# Supplementary material
Source: PubMed Central journal article supplement (PMC2928646)
Supplement: NIHMS218010-supplement-Supplemental_Material.pdf [file NIHMS218010-supplement-Supplemental_Material.pdf]

**Supplemental Material for: A multi-stage genome-wide association in breast cancer identifies two novel risk alleles at 1p11.2 and 14q24.1 (*RAD51L1*)**

Gilles Thomas<sup>1</sup>, Kevin B. Jacobs<sup>1,2,3</sup>, Peter Kraft<sup>4</sup>, Meredith Yeager<sup>1,3</sup>, Sholom Wacholder<sup>1</sup>, David G. Cox<sup>4,5</sup>, Susan E. Hankinson<sup>5</sup>, Amy Hutchinson<sup>1,3</sup>, Zhaoming Wang<sup>1,3</sup>, Kai Yu<sup>1</sup>, Nilanjan Chatterjee<sup>1</sup>, Montserrat Garcia-Closas<sup>1</sup>, Jesus Gonzalez-Bosquet<sup>1</sup>, Ludmila Prokunina-Olsson<sup>1</sup>, Nick Orr<sup>1</sup>, Walter C. Willett<sup>5,6</sup>, Graham A. Colditz<sup>7</sup>, Regina G. Ziegler<sup>1</sup>, Christine D. Berg<sup>8</sup>, Sandra S. Buys<sup>9</sup>, Catherine A. McCarty<sup>10</sup>, Heather Spencer Feigelson<sup>11</sup>, Eugenia E. Calle<sup>11</sup>, Michael J. Thun<sup>11</sup>, Ryan Diver<sup>11</sup>, Ross Prentice<sup>12</sup>, Rebecca Jackson<sup>13</sup>, Charles Kooperberg<sup>12</sup>, Rowan Chlebowski<sup>14</sup>, Jolanta Lissowska<sup>15</sup>, Beata Peplonska<sup>16</sup>, Louise A. Brinton<sup>1</sup>, Alice Sigurdson<sup>1</sup>, Michele Doody<sup>1</sup>, Parveen Bhatti<sup>1</sup>, Bruce H. Alexander<sup>17</sup>, Julie Buring<sup>18</sup>, I-Min Lee<sup>18</sup>, Lars J Vatten<sup>19</sup>, Kristian Hveem<sup>19</sup>, Merethe Kumle<sup>20</sup>, Richard B. Hayes<sup>1</sup>, Margaret Tucker<sup>1</sup>, Daniela S. Gerhard<sup>21</sup>, Joseph F. Fraumeni, Jr.<sup>1</sup>, Robert N. Hoover<sup>1</sup>, Stephen J Chanock<sup>1</sup>, David J. Hunter<sup>1,4,5,6,22</sup>

# Cancer Genetic Markers of Susceptibility (CGEMS) Breast Cancer Genome-Wide Association Scan

## Introduction

This report described the results of a GWAS of breast cancer performed in three stages, designated Stages 1, 2 and 3. In each stage, one or more breast cancer studies were genotyped on common SNP markers. The first stage, comprising the Nurses' Health Study using the Illumina HumanHap550 assay, was previously reported in Hunter et al (*Nature Genetics* 2008)<sup>1</sup>. In Stage 2, 33,352 SNPs were chosen and based on most significant findings observed in Stage 1 and genotyped in four independent studies. Similarly, Stage 3 interrogated 24 of the most promising SNPs based on a combined analysis of Stages 1 and 2 on additional samples in one study and in four additional studies. Stages 2 and 3 are novel and thus, the focus of this document.

## Stage 1

### Study Subjects

The Nurses' Health Study<sup>2,3</sup> (NHS) is a longitudinal study of 121,700 women enrolled in 1976. The CGEMS case-control study is derived from 32,826 participants who provided a blood sample between 1989 and 1990 and were free of diagnosed breast cancer at blood collection and followed for incident disease until May 2004. Cancer follow-up in the NHS was conducted by personal mailings and searches of the National Death Index. It is estimated that the percentage of true cancers captured by this system is greater than 90%. Permission was requested from all participants diagnosed with cancer to review medical records to confirm the diagnoses and obtain additional information on tumor histology, staging, and other characteristics. All study participants who were menopausal at blood draw with a confirmed diagnosis of invasive breast cancer and had sufficient stored blood available for DNA extraction at the time of case and control selection were included as cases in the CGEMS project. Controls were matched to cases based on age, blood collection variables (time, date, and year of blood collection, as well as recent (<3 months) use of postmenopausal hormones), ethnicity (all cases and controls are self-reported Caucasians), and menopausal status (all cases and controls were menopausal at blood draw).

### Genotyping

In stage 1 of CGEMS approximately 528,000 SNPs were successfully genotyped in the breast cancer scan (using the Illumina HumanHap550 chip, Illumina, San Diego, CA) in 1,145 breast cancer patients and an equivalent number of controls (n=1,142)<sup>1</sup>. Analysis of nearly 550,000 SNP genotypes per subject provides approximately 90% coverage of common SNPs based on HapMap Phase 2 with minor allele frequency (MAF) greater than 5% in the European population and a linkage disequilibrium coefficient threshold of  $r^2 > 0.8$  using the TagZilla program (<http://tagzilla.nci.nih.gov/>)<sup>4-6</sup>. Quality control metrics included sample completion rate, SNP assay completion rate, removal of duplicate

samples, and <15% admixture of non-European background, which were reported previously<sup>1</sup>.

Access to a subset of the individual raw phenotype and genotype data analyzed in the Nurses' Health Study as well as summary CGEMS data are available for scientific research purposes only (<https://caintegrator.nci.nih.gov/cgems>) through a registered access process. Registration by the individual investigator and the supporting institution are required as per the January 25, 2008 NIH Policy on GWAS Data Sharing. The data set for registered users includes genotypes from the Genome-Wide Association Scan (GWAS) and a set of covariates, namely, age (in 5 intervals: <55, 55-59, 60-64, 65-69, 70-74, and >74), family history of cancer (yes/no), and disease phenotype (control, case diagnosed with invasive breast cancer). Access to additional covariate data will be possible through established data sharing policies of NHS (<http://www.channing.harvard.edu/nhs>).

## Association Analysis

The primary analysis of the CGEMS breast GWAS study explores the association between a single SNPs and breast cancer susceptibility. This exploration is done one SNP at a time, sequentially for each SNP maintained in the study. The analytic approach assumes no structure to the risk across the 3 possible genotypes at each locus. This approach maintains power to detect recessive or over-dominant alleles at the cost of a small decrease in power relative to a Cochran-Armitage trend test for the detection of alleles with multiplicative risk effect. By maximizing genome coverage with a large number of SNPs and adopting an 'agnostic' approach to the analysis which does not take gene function or prior information on breast cancer or other phenotypes into consideration, we increase the opportunity to pursue different working hypotheses and different regions of interest now and in the future.

## Analytic procedure

Each participant is classified dichotomously according to her phenotype at the end of the follow-up period, namely a case diagnosed with invasive breast cancer or a matched control.

## Genotypes

In order to maintain high power to detect SNPs that are involved in non-multiplicative models (such as complete recessivity or over-dominance), we provide analyses of the data based on observed genotypes, considering each of the three possible genotype states separately. Accordingly, the analysis uses a statistical test with two degrees of freedom (two phenotypes cross-tabulated with three genotypes) when the rare homozygote genotype is observed more than 15 times (a somewhat arbitrary parameter imposed for numerical reasons). Otherwise, the rare homozygote genotype count is collapsed with the heterozygote genotype count, and a one degree of freedom test is used.

### Single SNP statistics

In order to expedite public access to the data, the first-pass analysis of the CGEMS data aims at detecting association of single SNPs with breast cancer susceptibility. Multi-SNP approaches, such as haplotype association, have not yet been fully explored.

### Statistical tests.

The characteristics of the analytical tests are:

i. *Unadjusted* score test

- **3-by-2 contingency table** of genotypes by phenotypes was constructed.
- **No adjustment** for covariates.
- The ***p-value*** from the standard test of independence was computed from the **3-by-2 contingency table**, based on a chi-squared test with up to 2 degrees of freedom.

ii. *Adjusted* score test

- **Dichotomous unconditional logistic regression** was performed.
  - Two phenotypes (either case or control);
  - The regression variable was performed on two-indicator variables for heterozygote and rare homozygote genotype states.
- **Adjustment** for
  - An indicator variable for each age group at randomization (ages categories <55, 55-59, 60-64, 65-69, 70-74, and >74, with range 55-59 as the reference),
  - an indicator for known hormone replacement therapy status at blood draw,
  - an indicator for unknown hormone replacement therapy status at diagnosis; this variable is included because it was a matching factor
  - three sets of coefficients to adjust for estimated population stratification corresponding to the top three eigenvectors identified by the principal component analysis.
- The ***p-value*** was obtained from a score test with up to 2 degrees of freedom.

## Stage 2. Large-scale Replication

### Studies

#### Women's Health Initiative (WHI)<sup>8</sup>

The WHI Observational Study (OS) cohort enrolled 93,676 postmenopausal women during 1993-1998. Women ineligible for, or not interested in, the clinical trials were given the opportunity to enroll in the OS. As of September 2005, the OS cohort had been followed for an average of 7.5 years. Detailed information on the cohort has been published<sup>7</sup>.

Initial reports of breast cancer were ascertained by self-administered annual questionnaires. Breast cancer occurrences were confirmed by medical record and

pathology report review by physician-adjudicators at the local clinical centers. All cases were subsequently classified centrally at the coordinating center by using the National Cancer Institute's Surveillance, Epidemiology, and End Results coding system (<http://www.seer.cancer.gov/>). A complete description of the WHI outcomes adjudication process is provided elsewhere<sup>8</sup>.

Pathologic confirmation is standard in WHI. Occasionally a cancer is diagnosed clinically because histologic confirmation is not available. Ninety-seven percent of self-reported breast cancer cases were confirmed locally. Subsequent central adjudication confirmed > 99% of the locally confirmed breast cancer cases, and 98% of the invasive breast cancer cases. Invasive breast cancers only are included in this project.

The set of breast cancer cases and controls for CGEMS was obtained from two previously selected breast cancer core studies. Participants were ineligible if they had an inadequate volume of available DNA, or refused genetic testing. One of the core studies also excluded participants with a history of breast cancer reported at baseline. Invasive breast cancer cases were matched to one control on age at screening, enrollment date, race/ethnicity, hysterectomy status at baseline and history of breast cancer at baseline.

Information on family history of breast cancer was obtained once, at screening. Personal history of breast biopsy occurrence was collected at screening, and annually during follow-up.

### **PLCO Breast Cancer Study<sup>9</sup>**

The Prostate, Lung, Colorectal, and Ovarian Cancer Screening Trial (PLCO), a randomized two-arm trial to determine if screening reduced the mortality from these cancers, enrolled during 1993-2001 155,000 men and women, aged 55–74, in 10 U.S. centers<sup>4</sup>. At study entry, demographic, medical, and lifestyle information and a blood sample were requested from the subjects assigned to the screening arm, including 39,000 women. Incident cancers are ascertained by annual mailed questionnaires (94% completion rate for living Trial participants), as well as searches of the National Death Index. For all reported cancers, medical records were requested from the appropriate hospitals to confirm diagnoses. Of the 37,800 women completing the baseline questionnaire and at least one follow up questionnaire, 83% also provided a blood sample and informed consent. Included in this nested case-control study of breast cancer are all 927 non-Hispanic white women with incident breast cancer reported by June 30, 2005, no previous history of breast cancer, a baseline questionnaire and blood sample, and informed consent. Also selected for this study were 927 non-Hispanic white controls, frequency matched to cases on age at randomization (5-year categories) and year of randomization (two categories), with no report of breast cancer as of June 30, 2005, a baseline questionnaire and blood sample, and informed consent. Because the youngest women in the cohort were 55 years at entry, practically all of the breast cancers diagnosed were postmenopausal.

### **The American Cancer Society Cancer Prevention Study II Nutrition Cohort (CPS-II)<sup>10</sup>**

The American Cancer Society Cancer Prevention Study II Nutrition Cohort (CPS-II) was established in 1992; the cohort includes over 86,000 men and 97,000 women from 21 U.S. states who completed a mailed questionnaire in 1992. At baseline, the cohort was 97% white and the median age of participants was 63 (range: 40-92). Starting in 1997, follow-up questionnaires have been sent to surviving cohort members every other year to update exposure information and to ascertain occurrence of new cases of cancer; a >90% response rate has been achieved for each follow-up questionnaire. Incident cancers are verified through medical records, state cancer registries, or death certificates. From 1998 - 2001, blood samples were collected from a subgroup of 39,376 cohort members.

Cases of postmenopausal breast cancer were frequency matched to controls on single year of age, ethnicity, date of sample collection and menopausal status (all postmenopausal). All controls were selected from individuals who were cancer-free (except for non-melanoma skin cancer) at the beginning of the interval preceding the diagnosis of each case. Similarly, cases were not eligible if they had a history of another cancer other than non-melanoma skin cancer prior to their diagnosis of breast cancer.

### **Polish Breast Cancer Study (PBCS)<sup>11</sup>**

A population-based breast cancer case-control study was conducted between 2000-2003 among female residents of Warsaw and Łódź, Poland, 20 to 74 years of age and of Polish Caucasian origin. Incident breast cancer cases were identified through participating hospitals and cancer registries, and confirmed by pathology review. Population controls with no history of breast cancer were randomly selected from population lists, frequency matched to cases on city and age in 5-year categories. A total of 2,386 cases (79% of those eligible) and 2,502 controls (69% of those eligible) agreed to participate in a personal interview regarding known and suspected risk factors for breast cancer. Blood cell samples were obtained at enrollment from 1,995 cases (6% in situ) and 2,296 controls, which represent 84 and 96%, respectively, of the study population. In addition, we obtained buccal cell DNA from an additional 238 cases and 85 controls.

In Stage 2, 669 cases and 506 controls were genotyped. The remainder of the study, 1,467 cases and 1,783 controls were genotyped with the 24 TaqMan SNPs in Stage 3. In addition, all subjects genotyped in Stage 2 were also genotyped in Stage 3 to assess concordance (see below).

### **Design**

Based on the results of Stage 1 in the NHS scan, 33,041 SNPs were chosen for a custom iSelect Infinium chip (Illumina). Due to either design or manufacturing problems, 2,593 SNPs failed, leaving 30,448 SNPs available for assay as per the chip manifest.

After passing quality control filters, the Stage 2 analysis of the CGEMS breast GWAS study explores the association in a function-agnostic approach based on ranked p-values observed in Stage 1 on 24,909 SNPs based on single-SNP association tests. 22,136 SNPs were selected based on the p-value less than 0.05 in a logistic regression model using a two-degree of freedom score test with indicator variables for heterozygous and homozygous carriers, adjusted for age, study design, and four continuous variables representing the top principal components of population stratification. The 2-df score test was chosen because it makes minimal assumptions for underlying genetic models. This set of SNPs was augmented by 2,773 SNPs with an observed p-value less than 0.06 in one of more 1-df tests of dominant, recessive or multiplicative models that were already not included by the 2-df described above. 1,436 SNPs were selected based on a two-SNP association test that conditioned each SNP on a neighboring SNP with marginal p-value less than 0.05, if this improved the p-value relative to the single SNP-statistics by an order of magnitude. In addition, 1,508 SNPs were chosen to monitor population structure.

Additional SNPs were chosen to explore high-profile genomic regions identified in GWAS studies with 1,711 SNPs for fine-mapping. 3,788 SNPs were drawn from candidate gene regions, collaboration with the Cancer Research UK breast cancer scan (Easton) and an analysis of suggested interaction with variants in intron 2 of *FGFR2*. These parallel hypotheses, not based on ranked p-values from Stage 1, will not be discussed here and are to be reported elsewhere. See figure 1 for the breakdown of SNPs selected.

**Figure i. Composition of Stage 2 Illumina iSelect design**

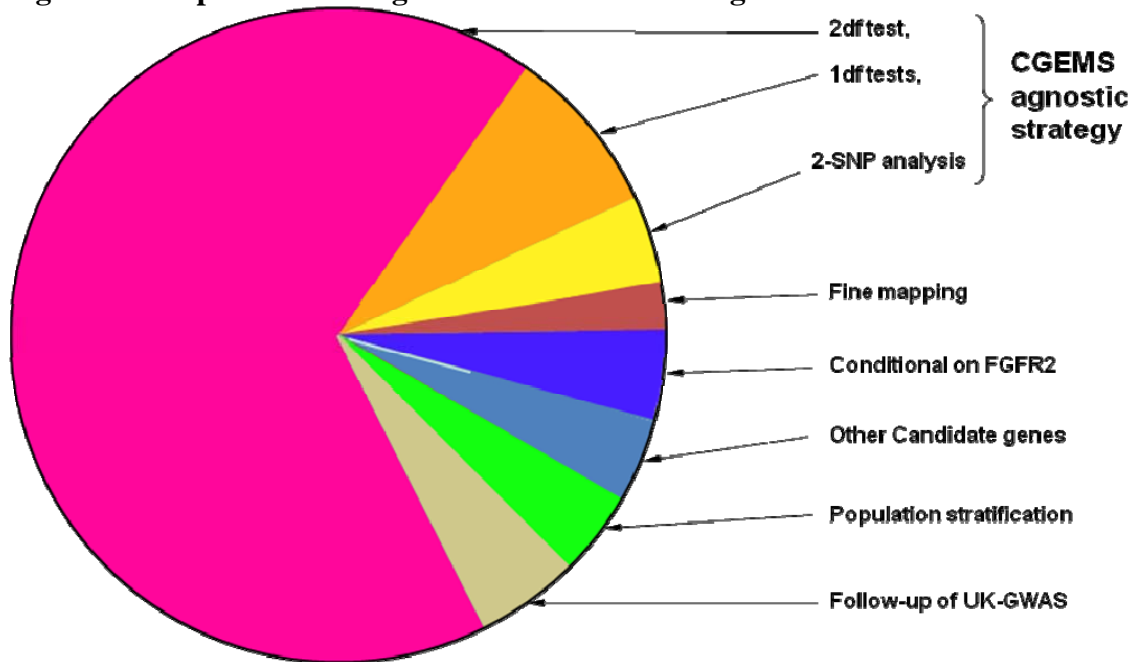

## Quality Control

DNA samples were received from each cohort and visually inspected for adequate fluid volume in individual tubes. Three measurements of DNA quantity were performed according to the standard procedures at the Core Genotyping Facility of the National Cancer Institute. These include pico-green analysis, optical density spectrophotometry and real time PCR (<http://cgf.nci.nih.gov/dnaquant.cfm>). Samples were also analyzed with 15 short tandem repeats and the Amelogenin marker in the Identifiler™ Assay (ABI, Foster City, CA). All samples advanced to genotype analysis completed no less than 13 of the 15 micro-satellite markers.

The quality control analysis is based on available samples from Stage 1<sup>1</sup> and Stage 2 summarized in Table i. The number of unique subjects available for analysis are listed in Table ii.

**Table i. Samples genotyped in STAGES 1+2 prior to quality control exclusions**

| Phenotype    | STUDY |       |       |       |       | Total  |
|--------------|-------|-------|-------|-------|-------|--------|
|              | CPSII | NHS   | PBCS  | PLCO  | WHI   |        |
| Case         | 556   | 1,247 | 805   | 1,058 | 2,505 | 6,171  |
| Control      | 564   | 1,224 | 605   | 1,185 | 2,516 | 6,094  |
| Unknown      | 8     |       |       | 2     |       | 10     |
| <b>Total</b> | 1,128 | 2,471 | 1,410 | 2,245 | 5,021 | 12,275 |

**Table ii. Subjects genotyped in STAGES 1+2 prior to quality control exclusions**

| Phenotype    | STUDY |       |       |       |       | Total  |
|--------------|-------|-------|-------|-------|-------|--------|
|              | CPSII | NHS   | PBCS  | PLCO  | WHI   |        |
| Case         | 556   | 1,158 | 788   | 1,058 | 2,457 | 6,017  |
| Control      | 564   | 1,159 | 586   | 1,083 | 2,451 | 5,843  |
| Unknown      | 4     |       |       | 2     |       | 6      |
| <b>Total</b> | 1,124 | 2,317 | 1,374 | 2,143 | 4,908 | 11,866 |

Quality control metrics include determination of discordance between reported sex and genotyped sex, unclear identity or sample contamination analysis, and poor assay performance, based on a 90% genotype completion threshold. The results are shown in Table iii.

SNPs were excluded for 2 reasons: 1) The assay failed manufacturing at Illumina or 2) The assay exhibited low completion rate in the laboratory. A total of SNPs failed to provide reliable genotype results due to either no call or low call rates (<90%; see Table i for distribution among SNP categories of inclusion).



**Table iii. Samples failing the quality control**

| <b>Study</b> | <b>Phenotype</b> | <b>Identifier profile discordance</b> | <b>gender discordance</b> | <b>low completion*</b> | <b>duplicate discordance</b> |
|--------------|------------------|---------------------------------------|---------------------------|------------------------|------------------------------|
| CPSII        | Case             |                                       |                           | 4                      |                              |
|              | Control          |                                       |                           | 11                     |                              |
| NHS          | Case             |                                       |                           | 30                     |                              |
|              | Control          |                                       |                           | 29                     |                              |
| PBCS         | Case             |                                       |                           | 125                    |                              |
|              | Control          |                                       |                           | 88                     |                              |
| PLCO         | Case             | 4                                     | 1                         | 3                      |                              |
|              | Control          | 4                                     | 1                         | 6                      | 2                            |
| WHI          | Case             |                                       |                           | 38                     | 1                            |
|              | Control          |                                       |                           | 31                     | 1                            |
| <b>Total</b> |                  | <b>8</b>                              | <b>2</b>                  | <b>365</b>             | <b>4</b>                     |

\* Missing rate threshold: 6% for Stage 1 (NHS) and 5% for Stage 2.

Table iv shows the available samples for analysis after quality control metrics, but before assessment of population heterogeneity.

**Table iv. Samples in STAGES 1+2 after quality control exclusions**

| <b>Phenotype</b> | <b>STUDY</b> |              |              |              |              | <b>Total</b>  |
|------------------|--------------|--------------|--------------|--------------|--------------|---------------|
|                  | <b>CPSII</b> | <b>NHS</b>   | <b>PBCS</b>  | <b>PLCO</b>  | <b>WHI</b>   |               |
| Case             | 552          | 1,217        | 680          | 1,050        | 2,466        | 5,965         |
| Control          | 553          | 1,195        | 517          | 1,172        | 2,484        | 5,921         |
| Unknown          | 8            | 2            | 10           |              |              | 20            |
| <b>Total</b>     | <b>1,113</b> | <b>2,412</b> | <b>1,197</b> | <b>2,224</b> | <b>4,950</b> | <b>11,896</b> |

Accounting for the known duplicates embedded in each of the studies, Table v presents the number of unique subjects with case/control status for subsequent analysis.

**Table v. Subjects in STAGES 1+2 after quality control exclusions**

| <b>Phenotype</b> | <b>STUDY</b> |              |              |              |              | <b>Total</b>  |
|------------------|--------------|--------------|--------------|--------------|--------------|---------------|
|                  | <b>CPSII</b> | <b>NHS</b>   | <b>PBCS</b>  | <b>PLCO</b>  | <b>WHI</b>   |               |
| Case             | 552          | 1,155        | 669          | 1,050        | 2,419        | 5,845         |
| Control          | 553          | 1,154        | 506          | 1,071        | 2,420        | 5,704         |
| Unknown          | 4            | 2            | 6            |              |              | 12            |
| <b>Total</b>     | <b>1,109</b> | <b>2,309</b> | <b>1,175</b> | <b>2,123</b> | <b>4,839</b> | <b>11,555</b> |

Table vi presents the concordance between known duplicate samples (pairs, except for and one triplicate in PLCO). Table vii summarizes the number reasons for excluding subjects in Stages 1 and 2 in addition to those excluded by the genotype quality control process.

**Table vi. Expected duplicates in STAGE 2**

| Study        | Duplicate pairs     | Concordance rate (%) | Concordant genotypes | genotype comparisons |
|--------------|---------------------|----------------------|----------------------|----------------------|
| CPSII        | 4                   | 99.930               | 120,731              | 120,815              |
| PLCO         | 100 + 1 trip        | 99.470               | 3,100,739            | 3,117,271            |
| PBCS         | 22                  | 99.996               | 652,103              | 652,127              |
| WHI          | 111                 | 99.998               | 3,365,635            | 3,365,710            |
| <b>Total</b> | <b>237 + 1 trip</b> | <b>99.770</b>        | <b>7,239,208</b>     | <b>7,255,923</b>     |

**Table vii. Subjects excluded from association**

| Study        | Phenotype | non-CEU admixture* | excluded by request of PI | inter-study duplicate | incomplete phenotype data | duplicate discordance |
|--------------|-----------|--------------------|---------------------------|-----------------------|---------------------------|-----------------------|
| NHS          | Case      | 3                  |                           |                       |                           | 7                     |
|              | Control   | 1                  |                           |                       |                           | 11                    |
| CPSII        | Case      | 8                  |                           | 9                     |                           |                       |
|              | Control   | 8                  |                           | 2                     |                           |                       |
| PBCS         | Case      |                    |                           |                       |                           |                       |
|              | Control   |                    |                           |                       |                           |                       |
| PLCO         | Case      | 89                 | 1                         | 14                    |                           |                       |
|              | Control   | 96                 |                           |                       |                           |                       |
| WHI          | Case      | 5                  |                           | 19                    |                           |                       |
|              | Control   | 8                  |                           | 2                     |                           |                       |
| <b>Total</b> |           | <b>218</b>         | <b>1</b>                  | <b>46</b>             | <b>6</b>                  | <b>18</b>             |

\* The minimum threshold for estimated CEU admixture is 85% for Stage 1 and 80% for Stage 2.

\*\* Two subjects were removed for two reasons: one has both a high degree of admixture and is an inter-study duplicate and one was admixed as well as excluded by request of the study investigators. Therefore the number of unique excluded subjects is 287 instead of 289.

### Assessment of Population Structure

Two independent sets of SNPs were used for the detection of population stratification in the four follow up samples. The first set of pre-selected 1,508 SNPs had been specifically chosen for typing in the follow-up studies for this purpose and were selected because of completion rates higher than 90%, a residual linkage disequilibrium  $r^2$  value lower than 0.1 for any pair of SNPs less than 200 Kb apart and enabling a stable detection of the first two principal components of population structure identified in the NHS study. The second set of 10,693 SNPs was selected from all of the SNPs typed in the follow-up studies because of indication of their possible associations in the genome-wide scan. The selection was based upon a completion rate higher than 90% and residual linkage disequilibrium  $r^2$  value lower than 0.0075 for any pair of SNPs less than 200Kb apart<sup>12</sup>.

In an attempt to maximize genetic homogeneity, subjects with significant estimated non-European ancestry were excluded from analysis. This estimation was done using the

STRUCTURE program by merging the genotypes from the follow-up studies with those of the reference HapMap population downloaded from the HapMap web site. The number of clusters (the “k” parameter) was set to three and the CEU, YRI and JPT+CHB samples were each specified to a different cluster schematically representing populations of European, African and Asian origin respectively<sup>13</sup>. The CGEMS samples were left unspecified. All individuals that had at greater than 80% European ancestry were retained for the replication study, regardless of their reported origin. Each of PLCO and WHI provided samples with known self-described non-European background. These samples were confirmed by STRUCTURE analysis and excluded from the primary analyses.

We defined the imputed origin as follows: a subject is considered to have a single continental origin if the estimated admixture portion was greater than 80% with any single seed population. Subjects were labeled “admixed” if their estimated proportion of admixture was greater than 20% with only one population, but less than 80%. Subjects with greater than 20% estimated admixture with more than one seed population was labeled as the concatenation of all such seed populations. For Stage 1, namely the GWAS in NHS, the cut-off used was 15%.

Figure 2 shows a plot of admixture coefficients estimated by STRUCTURE and Table viii lists subjects excluded from association analysis due to estimated non-CEU admixture.

**Figure ii: Admixture coefficients for Stage 2 subjects**

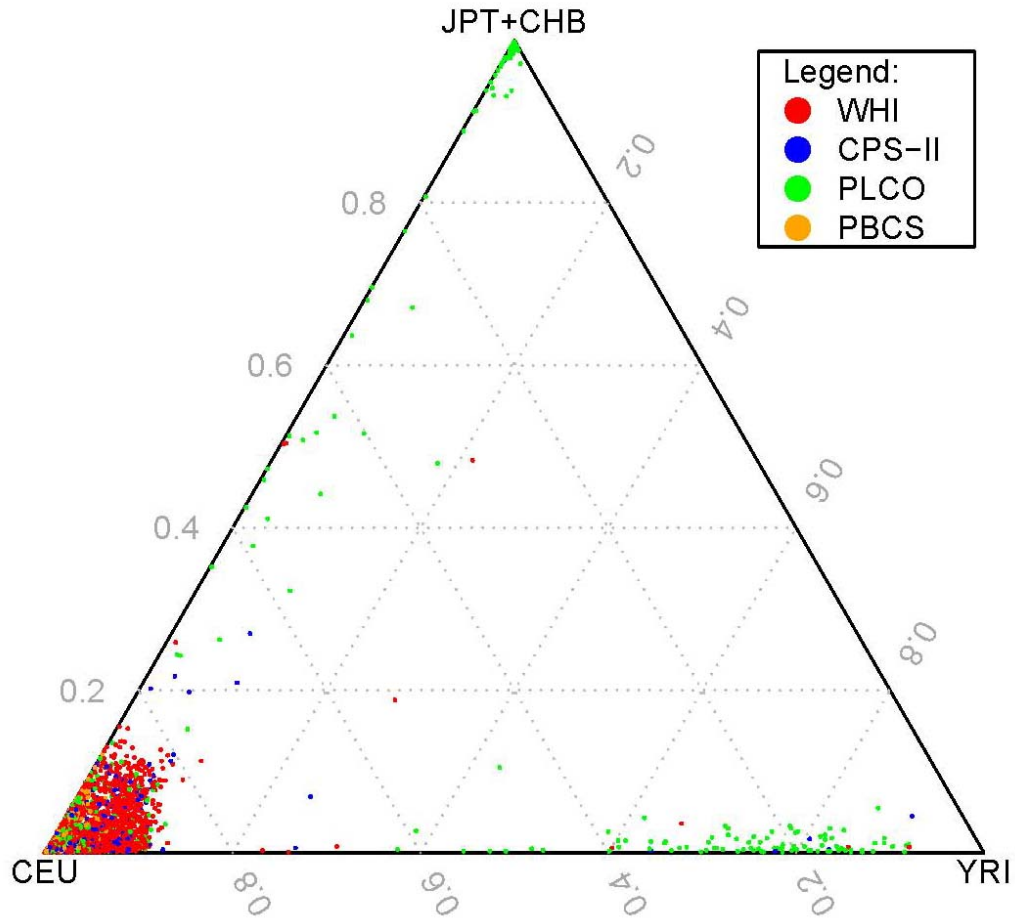

**Table viii. Admixture analysis exclusions**

| Study        | Imputed race   | Self-reported race |           |          |                     |           |                  |           |                     |                |
|--------------|----------------|--------------------|-----------|----------|---------------------|-----------|------------------|-----------|---------------------|----------------|
|              |                | American Indian    | Asian     | Black    | Black, non-Hispanic | Hispanic  | Pacific islander | White     | White, non-Hispanic | White/Hispanic |
| CPSII        | ADMIXED:CEU    |                    |           |          |                     |           |                  |           |                     | 1              |
|              | CEU,JPTCHB     |                    |           |          |                     | 4         |                  |           |                     |                |
|              | CEU,YRI        |                    |           | 4        |                     |           |                  |           |                     |                |
|              | JPTCHB         |                    | 4         |          |                     |           |                  |           |                     |                |
|              | YRI            |                    |           | 3        |                     |           |                  |           |                     |                |
| PLCO         | ADMIXED:CEU    |                    |           |          |                     | 1         |                  |           |                     |                |
|              | ADMIXED:YRI    |                    |           |          | 6                   |           |                  |           |                     |                |
|              | CEU,JPTCHB     | 2                  | 6         |          |                     | 7         | 7                |           |                     |                |
|              | CEU,YRI        |                    |           |          | 50                  |           |                  |           |                     |                |
|              | JPTCHB         |                    | 72        |          |                     |           | 2                |           |                     |                |
|              | YRI            |                    |           |          | 30                  | 1         |                  |           | 1                   |                |
| WHI          | ADMIXED:CEU    |                    |           |          |                     |           |                  | 1         |                     |                |
|              | CEU,JPTCHB     |                    |           |          |                     |           |                  | 3         |                     |                |
|              | CEU,JPTCHB,YRI |                    |           |          |                     |           |                  | 1         |                     |                |
|              | CEU,YRI        |                    |           |          |                     |           |                  | 6         |                     |                |
|              | YRI            |                    |           |          |                     |           |                  | 2         |                     |                |
| <b>Total</b> |                | <b>2</b>           | <b>82</b> | <b>7</b> | <b>86</b>           | <b>13</b> | <b>9</b>         | <b>13</b> | <b>1</b>            | <b>1</b>       |

Table ix presents the number of unique subjects available for analysis in Stage 1 and Stage 2.

**Table ix. Subjects used in association for STAGES 1+2**

| Phenotype    | STUDY        |              |              |              |              | Total         |
|--------------|--------------|--------------|--------------|--------------|--------------|---------------|
|              | CPSII        | NHS          | PBCS         | PLCO         | WHI          |               |
| Case         | 535          | 1,145        | 669          | 948          | 2,395        | <b>5,692</b>  |
| Control      | 543          | 1,142        | 506          | 975          | 2,410        | <b>5,576</b>  |
| <b>Total</b> | <b>1,078</b> | <b>2,287</b> | <b>1,175</b> | <b>1,923</b> | <b>4,805</b> | <b>11,268</b> |

## Hardy-Weinberg Proportion

Deviations from Hardy-Weinberg proportions were assessed on the control samples by each study. A Q-Q plot of the p values for each study is shown in Figure 3A. Expected p values were estimated using the uniform distribution for all loci and the observed p values were calculated based on the exact test. SNPs were filtered by only including autosomal SNPs with MAFs greater than 5% and completion rates greater than 95%. The

numbers of SNPs with p values less than 0.05 and 0.001 are shown in the plots. In order to check the low p-value corner of Figure 3A, Q-Q plot of p values in the logarithm space were shown in Figure 3B. Both figures demonstrate that globally there is no significant deviation from Hardy-Weinberg proportion.

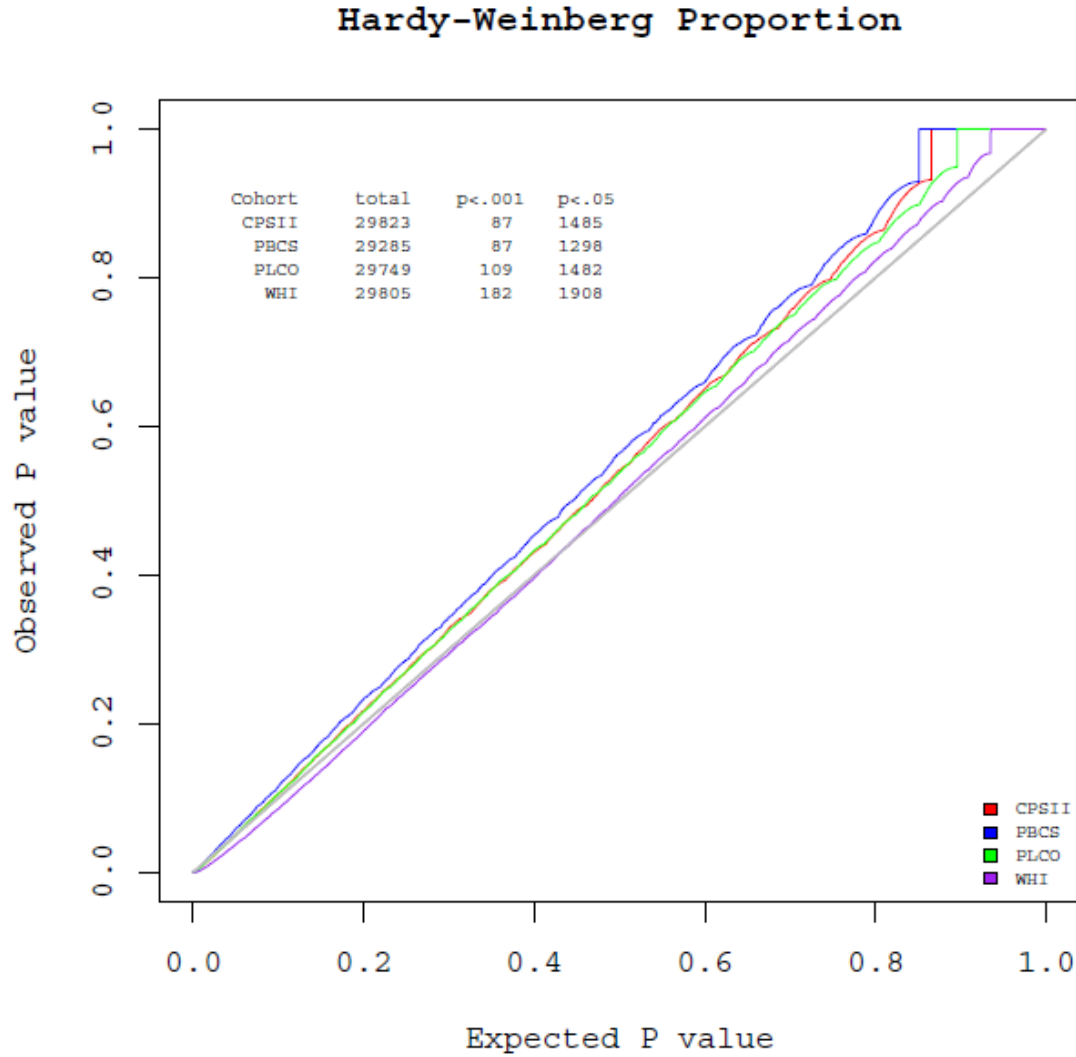

Figure iia

### Hardy-Weinberg Proportion

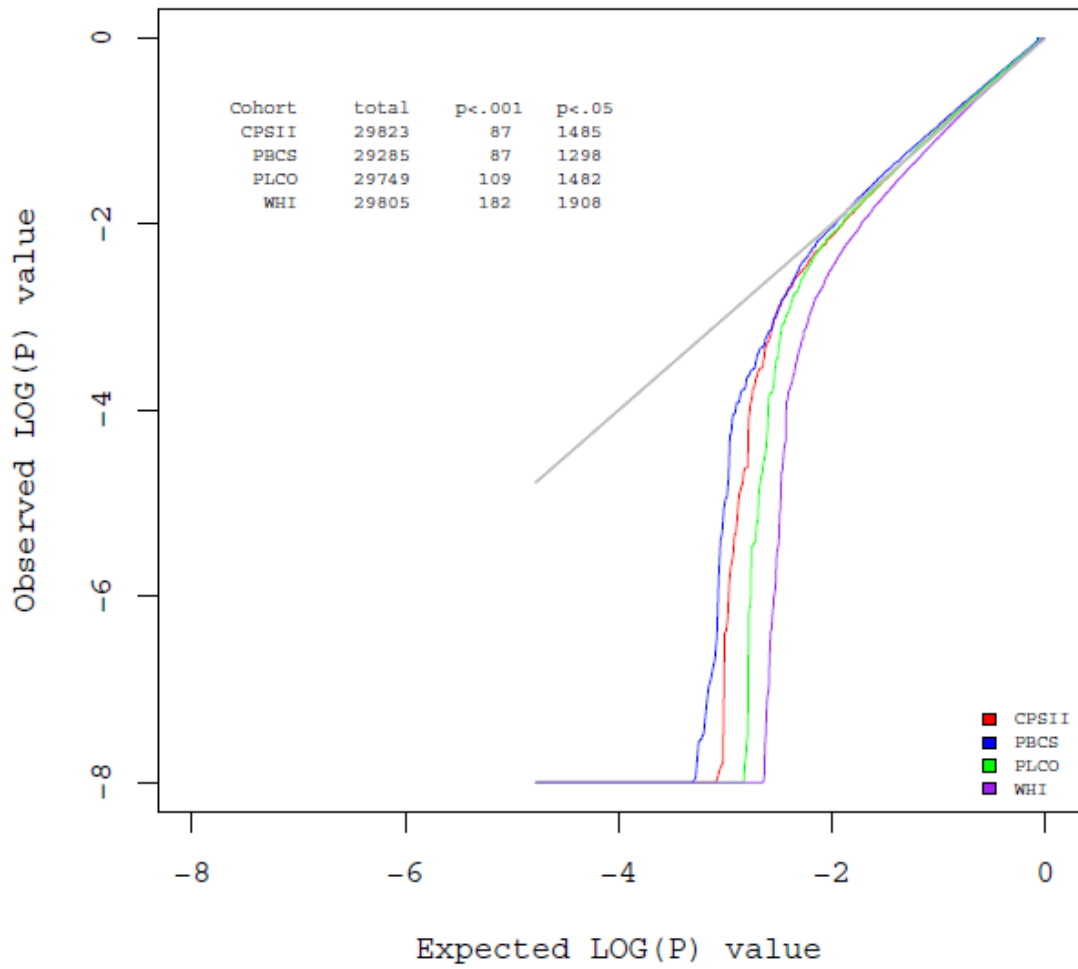

Figure iib

## Analysis

For the follow-up replication studies, all one- and two- SNPs analyses were conducted using unconditional logistic regression, adjusted for age (in ten-year categories) and study. We analyzed each study separately, the pooled replication studies (all except NHS), and all studies combined.

The analytic approach assumes no structure to the risk across the 3 possible genotypes at each locus. This approach maintains power to detect recessive or over-dominant alleles at the cost of a small decrease in power relative to the Cochran-Armitage trend test for the detection of alleles with multiplicative effect.

**Figure iv. Illumina Infinium genotype cluster plots for four notable SNPs**

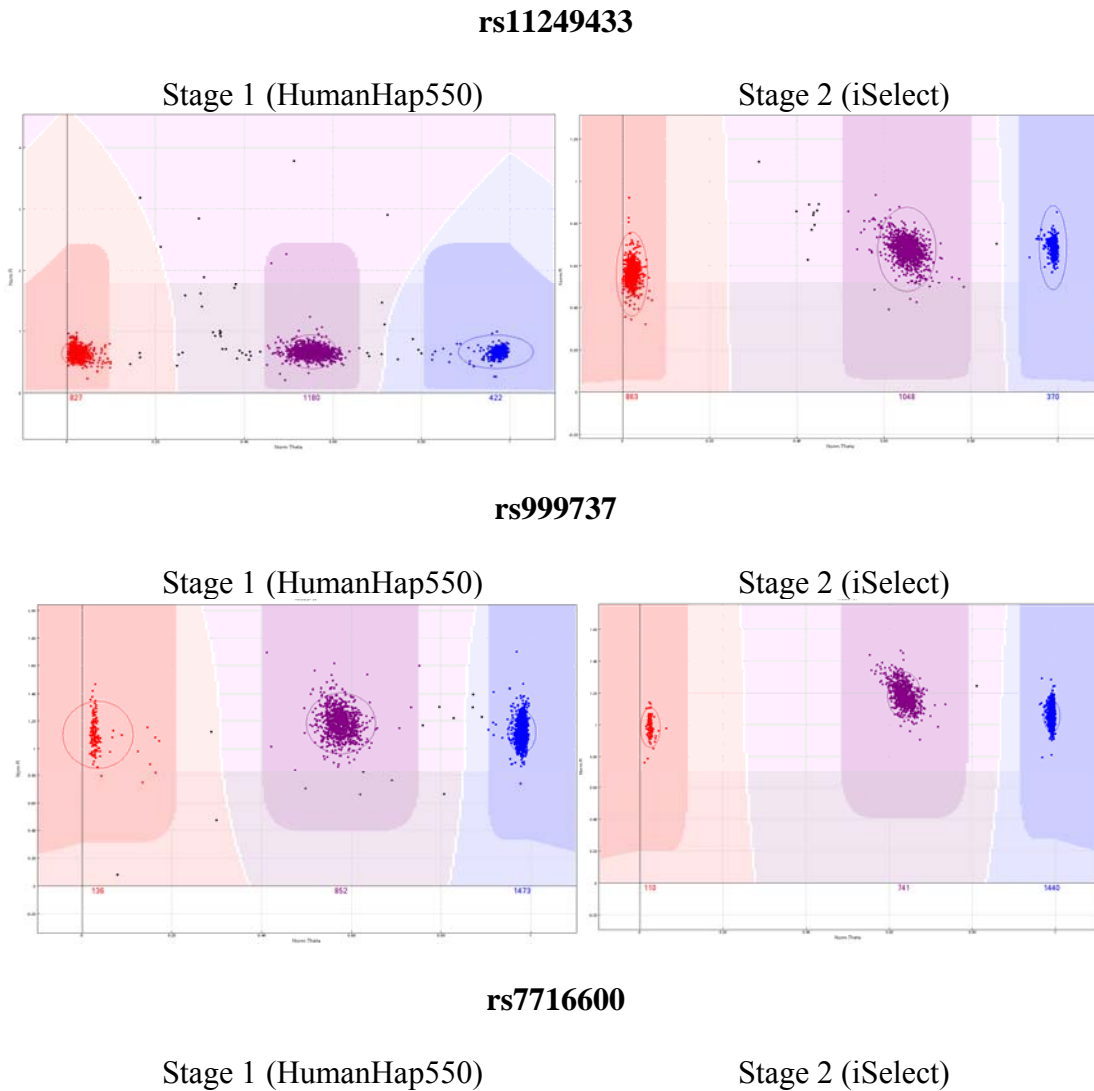



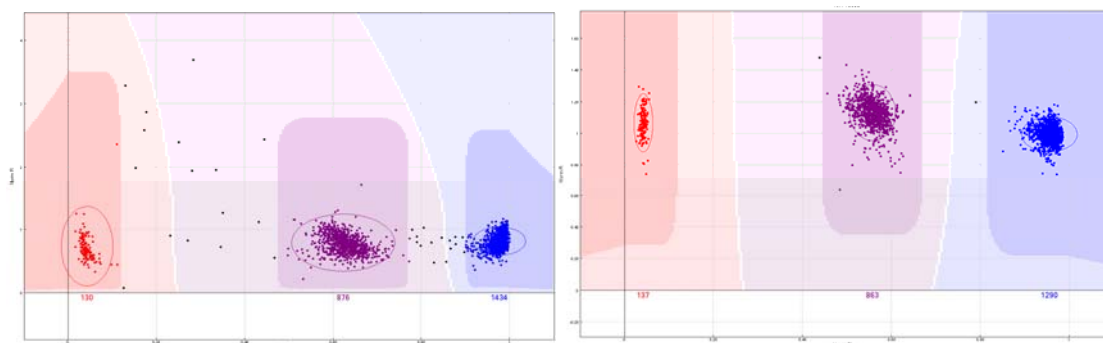

**rs2067980**

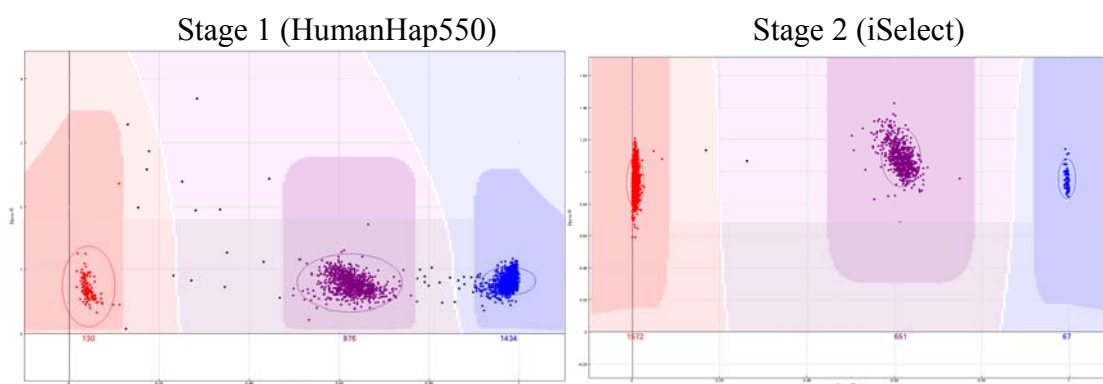

### Stage 3. Follow-up of 24 SNPs

#### Studies

#### Cohorts of Norway (CONOR)<sup>14</sup>

The primary aim of CONOR is to study the etiology, prevalence and incidence of a large number of diseases. CONOR is a collaboration of four population-based cohorts in Norway of approximately 180,000 participants of both sexes where information on the participants is collected at regular intervals. Core variables have been established through questionnaires, clinical measurements and venous blood sampling. Among the six studies data for this investigation were available from the HUNT and Tromsø studies (approximately 48,000 women). Incident breast cancer cases (n=566) were ascertained by linkage to the Norwegian Cancer Registry, and controls (n=545) were matched to the cases by age and study site. In this study, DNA from 516 cases and 498 controls were included.

#### Nurses' Health Study II (NHS II)<sup>15</sup>

The NHS2 began in 1989 when 116,671 female registered nurses (aged 25 to 42) from 14 U.S. states were enrolled. Blood samples were collected from 29,611 NHS2 participants in 1996-1999. Between blood collection and June 1, 2003 incident breast cancer cases (n=317) were identified via self-report, and confirmed by medical records. To increase power two controls for each case (n=634) were then selected for each case matched case based on year of follow-up, month and year of blood draw, and fasting status at blood draw, as well as age, menopausal status, and ethnicity. Pre-menopausal cases were additionally matched to controls based on luteal day (days before start of next menstrual cycle) to permit analyses of plasma hormone levels.

**The Women's Health Study (WHS)<sup>16</sup>**

The WHS is a completed randomized, double-blind, placebo-controlled trial investigating the benefits and risks of aspirin and vitamin E in the primary prevention of cancer and cardiovascular disease among 39,876 female health professionals, with enrollment beginning in April 1993. Blood samples have been collected from 28,345 women. WHS cases consisted of women with pathologically confirmed invasive breast cancer who had been diagnosed after blood collection and before 7 March, 2003. Controls were randomly selected participants who had given a blood sample, and were free of diagnosed cancer. Controls were matched to cases according to age, menopausal status and postmenopausal hormone use at time of blood draw.

**The U.S. Radiologic Technologists (USRT)<sup>17</sup>**

The USRT study was initiated in 1982 by the U. S. National Cancer Institute, in collaboration with the University of Minnesota and the American Registry of Radiologic Technologists and includes 146,022 (106,953 female) radiologic technologists who were certified for at least two years between 1926 and 1982. Cohort follow-up methods for cancer risk factors and health outcomes including incident breast cancer cases were by postal surveys, selected state cancer registry linkages, and the National Death Index. In 1998, all living female technologists reporting a primary breast cancer (ductal carcinoma *in situ* or invasive breast cancer) that was confirmed based on pathology or medical records were eligible for inclusion in the nested breast cancer case-control study. Controls were technologists who had not reported a diagnosis of breast cancer prior to 1998 and were randomly selected and frequency matched to cases (ratio 1.5:1) by birth year in 5 year strata. Sixty-three % of cases (n=874) and 48 % of controls (N=1094) provided informed consent, a blood sample, and completed a telephone interview. Few differences were found when demographic and other characteristics among responders, non-responders, and decedents were compared.

**Genotype Analysis**

**Table x. Samples Genotyped in Stage 3.**

| <b>Study</b> | <b>Controls</b> | <b>Cases</b> |
|--------------|-----------------|--------------|
| NHS2         | 1,243           | 619          |
| NOR          | 498             | 516          |

|              |              |              |
|--------------|--------------|--------------|
| PBCS2        | 1,783        | 1,467        |
| USRT         | 998          | 780          |
| WHS          | 701          | 696          |
| <b>Total</b> | <b>5,223</b> | <b>4,078</b> |

TaqMan assays were designed and optimized for 24 SNPs (see Figure 4 for plots of assay probe intensity and genotype clusters from Stages 1 and 2). Primers and probes are available on the SNP500Cancer website (<http://snp500cancer.nci.nih.gov>). Assays were validated according to the SNP500Cancer optimization protocol with assay completion rates shown in Table xi. 11 additional subjects were genotyped but excluded from analysis due to incomplete phenotype data.

In order to confirm the validity of the genotype call using the Infinium™ Technology (Illumina Corp., San Diego, CA), 24 SNPs were assayed by TaqMan™ (ABI, Foster City, CA) platform in the Polish Breast Breast Cancer Study to assess the concordance between Infinium™-generated genotype calls shown in Table xii and displays the concordance rate between Infinium and TaqMan genotypes and GenTrain scores for the Infinium assays<sup>18</sup>.

**Table xi. Completion Rates for each of 24 SNPs overall**

| Locus      | Completion Rate |
|------------|-----------------|
| rs999737   | 97.6%           |
| rs10850145 | 98.4%           |
| rs10941679 | 97.3%           |
| rs11077820 | 97.3%           |
| rs11249433 | 97.0%           |
| rs12608723 | 98.1%           |
| rs12622050 | 97.2%           |
| rs1274466  | 97.9%           |
| rs17570439 | 97.3%           |
| rs17740709 | 97.2%           |
| rs2067980  | 97.6%           |
| rs2303659  | 97.5%           |
| rs2391406  | 97.2%           |
| rs3134615  | 98.0%           |
| rs37936    | 97.7%           |
| rs3817198  | 98.0%           |
| rs4415084  | 97.6%           |
| rs4666451  | 97.7%           |
| rs7121523  | 97.7%           |
| rs724244   | 97.8%           |
| rs7936636  | 97.7%           |
| rs7716600  | 98.0%           |

|                |              |
|----------------|--------------|
| rs9491859      | 97.3%        |
| rs998592       | 97.8%        |
| <b>Overall</b> | <b>97.6%</b> |

**Table xii. Concordance between Infinium iSelect and TaqMan-derived genotypes for the 24 SNPs in Stage 3.**

| <b>SNP</b> | <b>concordant genotypes</b> | <b>discordant genotypes</b> | <b>discordance rate</b> |
|------------|-----------------------------|-----------------------------|-------------------------|
| rs2303659  | 1,109                       | 1                           | 0.09%                   |
| rs17570439 | 1,105                       | 1                           | 0.09%                   |
| rs7121523  | 1,097                       | 1                           | 0.09%                   |
| rs7936636  | 1,088                       | 2                           | 0.18%                   |
| rs10850145 | 1,110                       | 3                           | 0.27%                   |
| rs2067980  | 1,102                       | 4                           | 0.36%                   |
| rs3134615  | 1,101                       | 4                           | 0.36%                   |
| rs998592   | 1,097                       | 4                           | 0.36%                   |
| rs17740709 | 1,094                       | 4                           | 0.36%                   |
| rs11077820 | 1,100                       | 5                           | 0.45%                   |
| rs3817198  | 1,095                       | 6                           | 0.55%                   |
| rs11249433 | 1,093                       | 6                           | 0.55%                   |
| rs12622050 | 1,090                       | 6                           | 0.55%                   |
| rs724244   | 1,103                       | 7                           | 0.63%                   |
| rs4666451  | 1,102                       | 7                           | 0.63%                   |
| rs9491859  | 1,100                       | 8                           | 0.72%                   |
| rs999737   | 1,097                       | 8                           | 0.72%                   |
| rs2391406  | 1,093                       | 8                           | 0.73%                   |
| rs7716600  | 1,100                       | 9                           | 0.81%                   |
| rs1274466  | 1,095                       | 11                          | 0.99%                   |
| rs12608723 | 1,088                       | 11                          | 1.00%                   |
| rs4415084  | 1,095                       | 14                          | 1.26%                   |

**Reference List**

1. Hunter, D.J. et al. A genome-wide association study identifies alleles in FGFR2 associated with risk of sporadic postmenopausal breast cancer. *Nat Genet.* **39**, 870-874 (2007).
2. Colditz, G.A. & Rosner, B. Cumulative Risk of Breast Cancer to Age 70 Years According to Risk Factor Status: Data from the Nurses' Health Study. *Am J Epidemiol.* **152**, 950-964 (2000).
3. Tworoger, S.S., Eliassen, A.H., Sluss, P. & Hankinson, S.E. A Prospective Study of Plasma Prolactin Concentrations and Risk of Premenopausal and Postmenopausal Breast Cancer. *J Clin Oncol.* **25**, 1482-1488 (2007).
4. The International HapMap Project. *Nature* **426**, 789-796 (2003).
5. Barrett, J.C., Fry, B., Maller, J. & Daly, M.J. Haploview: analysis and visualization of LD and haplotype maps. *Bioinformatics* **21**, 263-5 (2005).
6. The International HapMap Project. A haplotype map of the human genome. *Nature* **437**, 1299-1320 (2005).
7. Langer, R.D. et al. The women's health initiative observational study: baseline characteristics of participants and reliability of baseline measures. *Ann Epidemiol.* **13**, S107-S121 (2003).
8. Curb, J.D. et al. Outcomes ascertainment and adjudication methods in the women's health initiative. *Ann Epidemiol* **13**, S122-S128 (2003).
9. Hayes, R.B. Etiologic and early marker studies in the prostate, lung, colorectal and ovarian (PLCO) cancer screening trial. *Control. Clin. Trials* **21**, 349S-355S (2000).
10. Stevens, V.L., Rodriguez, C., Pavluck, A.L., Thun, M.J. & Calle, E.E. Association of polymorphisms in the paraoxonase 1 gene with breast cancer incidence in the CPS-II Nutrition Cohort. *Cancer Epidemiol. Biomarkers Prev.* **15**, 1226-1228 (2006).
11. Garcia-Closas, M. et al. Common genetic variation in TP53 and its flanking genes, WDR79 and ATP1B2, and susceptibility to breast cancer. *Int J Cancer* **121**, 2532-2538 (2007).
12. Yu, K. et al. Population Substructure and Control Selection in Genome-Wide Association Studies. *PLoS ONE* **3**, e2551 (2008).
13. Price, A.L. Principal components analysis corrects for stratification in genome-wide association studies. *Nat Genet.* **38**, 904-909 (2006).
14. Naess, O. et al. Cohort Profile: Cohort of Norway (CONOR). *Int J Epidemiol.* **37**, 481-485 (2008).
15. Eliassen, A.H., Tworoger, S.S., Mantzoros, C.S., Pollak, M.N. & Hankinson, S.E. Circulating Insulin and C-Peptide Levels and Risk of Breast Cancer among Predominately Premenopausal Women. *Cancer Epidemiol Biomarkers Prev.* **16**, 161-164 (2007).
16. Rexrode, K.M., Lee, I.M., Cook, N.R., Hennekens, C.H. & Buring, J.E. Baseline Characteristics of Participants in the Women's Health Study. *J Womens Health Gen Based Med.* **9**, 19-27 (2000).
17. Bhatti, P. et al. Polymorphisms in DNA repair genes, ionizing radiation exposure and risk of breast cancer in U.S. Radiologic technologists. *Int J Cancer* **122**, 177-182 (2008).

18. NCI-NHGRI Working Group on Replication in Association Studies. Replicating genotype-phenotype associations. *Nature* **447**, 655-660 (2007).

## Supplemental Figure 1. Results of Combined Stage 1 and 2

This figure includes the most promising SNP associations based on a combined analysis of Stage 1 and Stage 2. A joint analysis of the genotypes was performed using an age, study design and population stratification-adjusted logistic regression analysis (2 df test). Dashed vertical lines indicate loci previously reported in GWAS<sup>10-13,19</sup>. The horizontal magenta line denotes the range of genome-wide significance ( $p < 5 \times 10^{-7}$ ). Black vertical arrows indicate loci explored in Stage 3 chosen on the basis of the p value. The magenta vertical arrow points to rs3817198 in the *LSP1* gene. Blue dots denote the results of the genotype test and red dots denote the trend test.

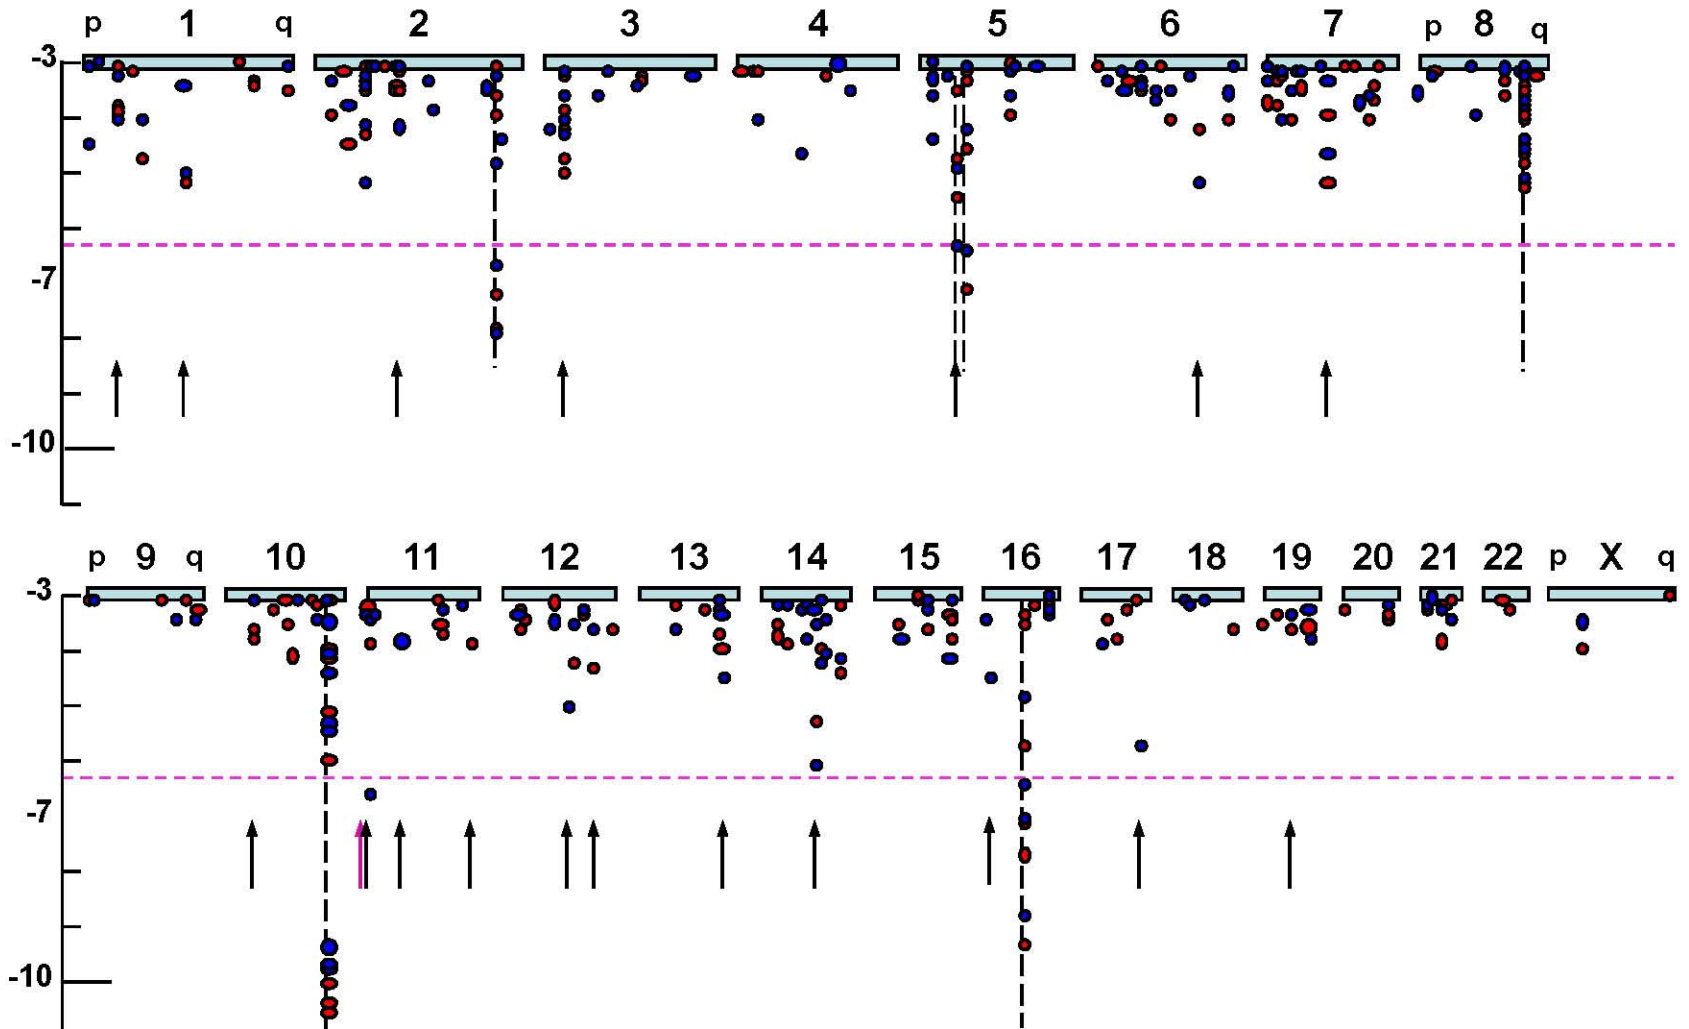

## Supplemental Figure 2. Linkage Disequilibrium Plot of Chromosome 14q24.1 Region.

Chromosome 14q24.1 region marked by rs999737 and bounded by SNPs between chr14:67,854,652-68,151,670. Note that the SNP (and the surrogate analyzed in Stage 3, rs10483813, because of difficulties in designing an optimized TaqMan assay) is located in an intron exclusive to the longest predicted transcript of *RAD51L1*. The SNP resides in a region bounded by the last exon in *RAD51L1*, which has been reported in one of the three known splice variants. LD metric shown is  $D'$ ; black triangles represent haplotype blocks based on confidence intervals (Haploview).

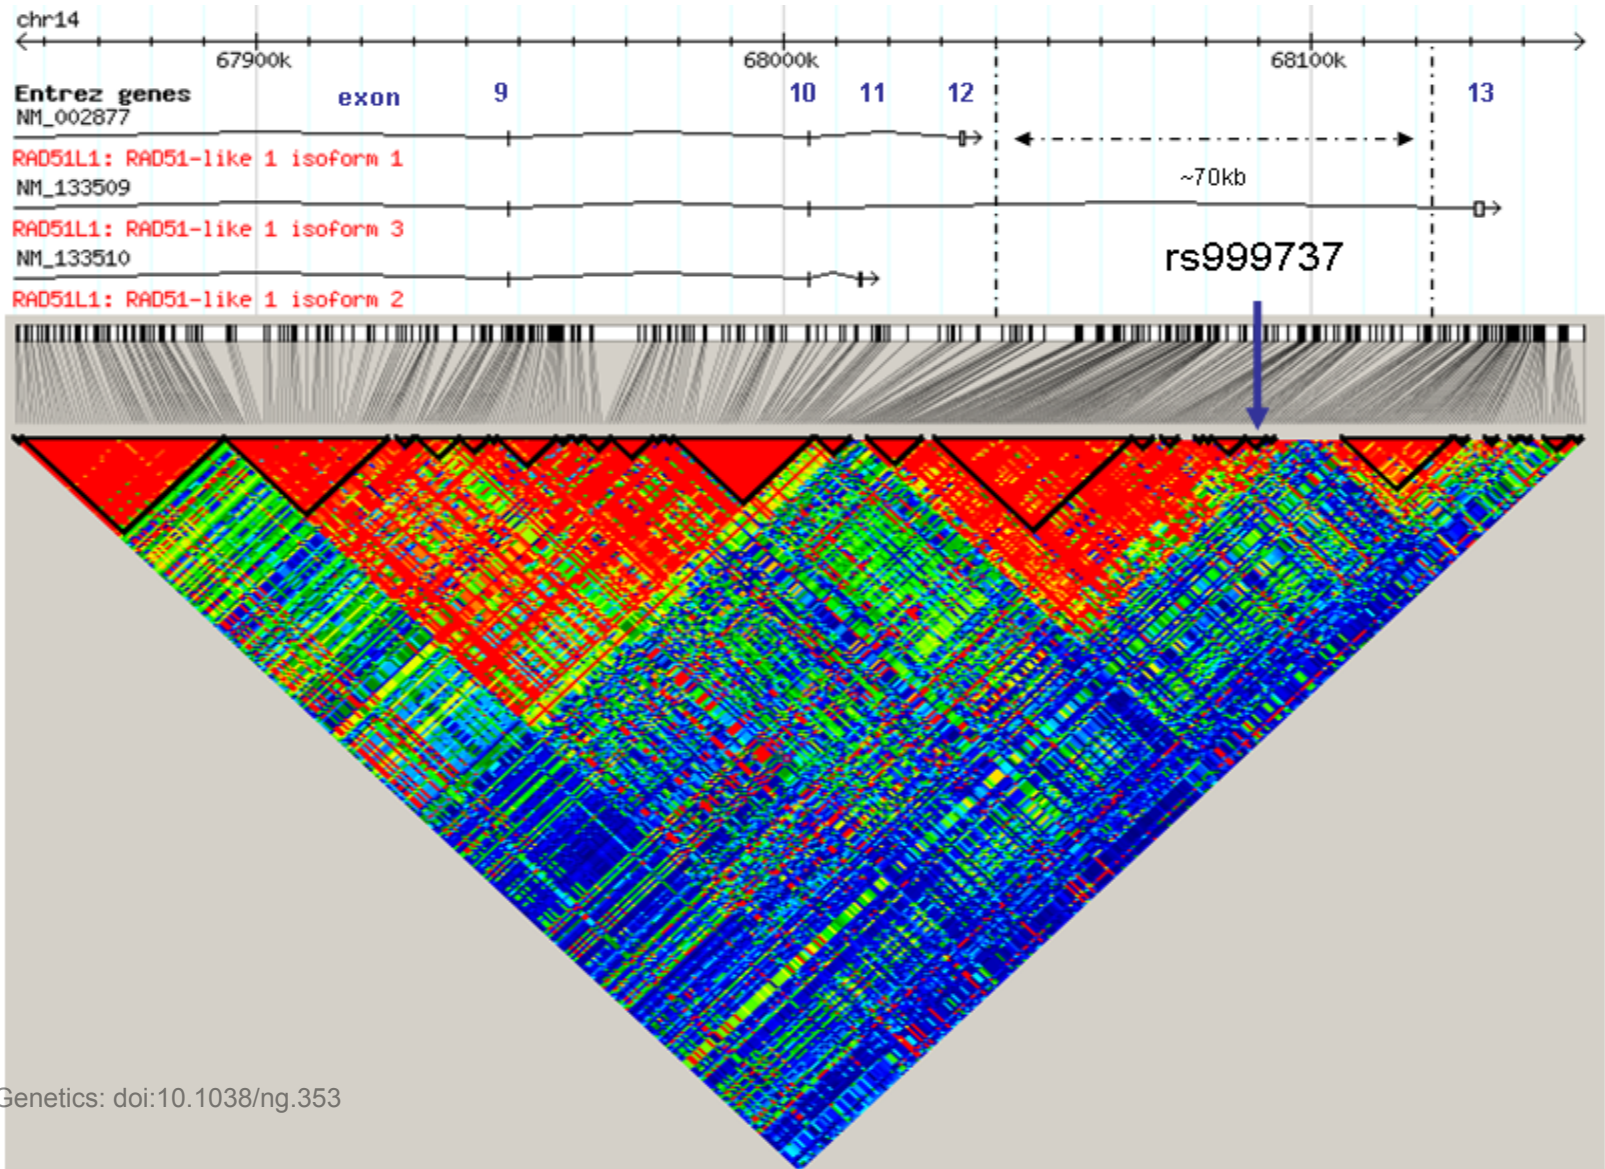





|          |    |             |                             |           |       |           |   |      |      |      |      |      |      |
|----------|----|-------------|-----------------------------|-----------|-------|-----------|---|------|------|------|------|------|------|
| STAGE1-2 | 3  | 0.239 0.212 | 3092 1863 330 3354 1858 226 | 5285 5438 | 27.75 | 9.40E-07  | 2 | 0.92 | 0.85 | 1.00 | 0.63 | 0.53 | 0.75 |
| STAGE2   | 4  | 0.237 0.212 | 2432 1457 254 2651 1464 179 | 4143 4294 | 19.38 | 6.18E-05  | 2 | 0.92 | 0.84 | 1.01 | 0.65 | 0.53 | 0.79 |
| CPSII    | 20 | 0.235 0.222 | 319 193 31 325 182 28       | 543 535   | 0.54  | 0.7648915 | 2 | 0.93 | 0.72 | 1.20 | 0.85 | 0.50 | 1.46 |
| PBCS1    | 7  | 0.242 0.213 | 291 185 30 409 234 25       | 506 668   | 3.79  | 0.1501912 | 2 | 0.91 | 0.71 | 1.17 | 0.58 | 0.33 | 1.02 |
| PLCO     | 3  | 0.238 0.215 | 576 334 65 576 336 36       | 975 948   | 7.63  | 0.0220161 | 2 | 1.00 | 0.82 | 1.21 | 0.56 | 0.36 | 0.85 |
| WHI      | 10 | 0.235 0.209 | 1416 854 139 1492 801 101   | 2409 2394 | 9.38  | 0.0091668 | 2 | 0.89 | 0.79 | 1.01 | 0.69 | 0.53 | 0.90 |
| STAGE3   | 5  | 0.240 0.226 | 2918 1789 310 2366 1399 195 | 5017 3960 | 6.71  | 0.0348632 | 2 | 0.95 | 0.87 | 1.04 | 0.78 | 0.65 | 0.95 |
| NHS2     | 18 | 0.234 0.226 | 664 362 77 336 187 32       | 1103 555  | 0.93  | 0.6273499 | 2 | 1.02 | 0.82 | 1.27 | 0.82 | 0.53 | 1.26 |
| NOR      | 3  | 0.257 0.215 | 271 195 30 319 171 25       | 496 515   | 5.60  | 0.0608396 | 2 | 0.74 | 0.57 | 0.97 | 0.71 | 0.40 | 1.23 |
| PBCS2    | 11 | 0.236 0.226 | 1016 637 94 850 514 66      | 1747 1430 | 1.21  | 0.5462296 | 2 | 0.96 | 0.83 | 1.12 | 0.84 | 0.60 | 1.17 |
| RADT     | 19 | 0.243 0.232 | 572 357 62 459 275 43       | 991 777   | 0.29  | 0.8629217 | 2 | 0.98 | 0.80 | 1.19 | 0.90 | 0.59 | 1.35 |
| WHS      | 3  | 0.244 0.227 | 395 238 47 402 252 29       | 680 683   | 4.75  | 0.0931328 | 2 | 1.04 | 0.83 | 1.30 | 0.61 | 0.37 | 0.98 |
| PBCS 1+2 | 6  | 0.237 0.222 | 1306 819 124 1257 746 92    | 2249 2095 | 3.63  | 0.1629349 | 2 | 0.94 | 0.83 | 1.07 | 0.77 | 0.58 | 1.02 |

Locus Alleles Chr Location Neighborhood  
rs7716600 C|A 5p12 44910762

| SUBSET   | Rank | MAF         | Geno Counts                 | Subjects   | score X2 | score p-value | df | het OR | het OR 95% CI | het OR 95% CI | hom OR | hom OR 95% CI | hom OR 95% CI_u |
|----------|------|-------------|-----------------------------|------------|----------|---------------|----|--------|---------------|---------------|--------|---------------|-----------------|
| STAGE1-3 | 3    | 0.221 0.241 | 6270 3545 506 5441 3395 564 | 10321 9400 | 21.45    | 2.20E-05      | 2  | 1.10   | 1.04          | 1.17          | 1.28   | 1.13          | 1.45            |
| NHS      | 8    | 0.215 0.249 | 693 402 44 652 415 78       | 1139 1145  | 10.59    | 0.0050057     | 2  | 1.09   | 0.92          | 1.30          | 1.87   | 1.27          | 2.75            |
| STAGE1-2 | 2    | 0.216 0.243 | 3227 1823 226 3147 1934 354 | 5276 5435  | 28.74    | 5.74E-07      | 2  | 1.08   | 1.00          | 1.17          | 1.59   | 1.34          | 1.90            |
| STAGE2   | 6    | 0.216 0.241 | 2534 1421 182 2495 1519 276 | 4137 4290  | 18.95    | 7.66E-05      | 2  | 1.08   | 0.98          | 1.18          | 1.53   | 1.26          | 1.86            |
| CPSII    | 19   | 0.225 0.236 | 325 192 26 315 186 33       | 543 534    | 0.71     | 0.6998429     | 2  | 1.01   | 0.78          | 1.30          | 1.26   | 0.73          | 2.17            |
| PBCS1    | 3    | 0.217 0.263 | 308 173 23 362 256 47       | 504 665    | 5.48     | 0.0647072     | 2  | 1.24   | 0.97          | 1.59          | 1.67   | 0.98          | 2.83            |
| PLCO     | 18   | 0.223 0.238 | 577 359 37 546 353 49       | 973 948    | 1.68     | 0.4307092     | 2  | 1.03   | 0.86          | 1.25          | 1.34   | 0.86          | 2.10            |
| WHI      | 5    | 0.212 0.239 | 1499 797 111 1412 818 163   | 2407 2393  | 12.82    | 0.0016444     | 2  | 1.09   | 0.97          | 1.23          | 1.56   | 1.21          | 2.01            |
| STAGE3   | 4    | 0.226 0.237 | 3043 1724 280 2293 1464 209 | 5047 3966  | 7.65     | 0.0218214     | 2  | 1.13   | 1.03          | 1.24          | 1.00   | 0.82          | 1.20            |
| NHS2     | 9    | 0.229 0.236 | 676 383 66 324 211 27       | 1125 562   | 2.47     | 0.290905      | 2  | 1.15   | 0.93          | 1.42          | 0.85   | 0.53          | 1.36            |
| NOR      | 15   | 0.246 0.241 | 284 178 33 293 191 28       | 495 512    | 0.87     | 0.6461693     | 2  | 1.04   | 0.80          | 1.35          | 0.80   | 0.47          | 1.37            |
| PBCS2    | 4    | 0.223 0.231 | 1070 586 98 847 518 74      | 1754 1439  | 2.48     | 0.2887188     | 2  | 1.12   | 0.97          | 1.30          | 0.97   | 0.71          | 1.34            |
| RADT     | 3    | 0.216 0.253 | 604 350 39 430 293 49       | 993 772    | 8.35     | 0.0154048     | 2  | 1.19   | 0.97          | 1.45          | 1.79   | 1.15          | 2.78            |
| WHS      | 5    | 0.232 0.230 | 409 227 44 399 251 31       | 680 681    | 3.61     | 0.1648217     | 2  | 1.13   | 0.90          | 1.42          | 0.72   | 0.45          | 1.17            |
| PBCS 1+2 | 3    | 0.221 0.241 | 1378 757 121 1210 771 122   | 2256 2103  | 5.44     | 0.0659559     | 2  | 1.16   | 1.02          | 1.32          | 1.14   | 0.88          | 1.49            |

Locus Alleles Chr Location Neighborhood  
rs4415084 C|T 5p12 44698272

| SUBSET   | Rank | MAF         | Geno Counts                   | Subjects   | score X2 | score p-value | df | het OR | het OR 95% CI | het OR 95% CI | hom OR | hom OR 95% CI | hom OR 95% CI_u |
|----------|------|-------------|-------------------------------|------------|----------|---------------|----|--------|---------------|---------------|--------|---------------|-----------------|
| STAGE1-3 | 4    | 0.406 0.429 | 3665 4889 1739 3084 4520 1763 | 10293 9367 | 20.01    | 4.53E-05      | 2  | 1.09   | 1.03          | 1.17          | 1.20   | 1.11          | 1.31            |
| NHS      | 3    | 0.392 0.435 | 429 513 186 350 583 203       | 1128 1136  | 12.99    | 0.0015098     | 2  | 1.39   | 1.16          | 1.67          | 1.34   | 1.05          | 1.71            |
| STAGE1-2 | 21   | 0.402 0.427 | 1895 2517 858 1797 2627 1006  | 5270 5430  | 12.71    | 0.0017364     | 2  | 1.09   | 1.00          | 1.19          | 1.22   | 1.09          | 1.37            |
| STAGE2   | 20   | 0.404 0.425 | 1466 2004 672 1447 2044 803   | 4142 4294  | 8.23     | 0.0163348     | 2  | 1.02   | 0.93          | 1.13          | 1.19   | 1.05          | 1.36            |
| CPSII    | 17   | 0.427 0.399 | 178 265 99 193 257 85         | 542 535    | 1.68     | 0.4317906     | 2  | 0.90   | 0.69          | 1.18          | 0.79   | 0.55          | 1.13            |
| PBCS1    | 4    | 0.410 0.460 | 174 249 83 193 337 139        | 506 669    | 5.42     | 0.0666335     | 2  | 1.23   | 0.94          | 1.61          | 1.49   | 1.05          | 2.11            |
| PLCO     | 19   | 0.408 0.422 | 339 475 160 321 454 173       | 974 948    | 0.80     | 0.671537      | 2  | 0.98   | 0.80          | 1.20          | 1.10   | 0.84          | 1.43            |
| WHI      | 16   | 0.400 0.420 | 866 1158 385 827 1120 446     | 2409 2393  | 5.87     | 0.0531945     | 2  | 1.01   | 0.89          | 1.15          | 1.21   | 1.03          | 1.43            |
| STAGE3   | 3    | 0.412 0.433 | 1770 2375 882 1289 1898 760   | 5027 3947  | 8.31     | 0.015715      | 2  | 1.10   | 1.00          | 1.21          | 1.19   | 1.05          | 1.34            |
| NHS2     | 6    | 0.402 0.436 | 413 517 193 178 270 107       | 1123 555   | 3.81     | 0.149111      | 2  | 1.21   | 0.96          | 1.52          | 1.29   | 0.96          | 1.73            |
| NOR      | 10   | 0.438 0.413 | 156 242 95 177 248 88         | 493 513    | 1.35     | 0.5090269     | 2  | 0.90   | 0.68          | 1.19          | 0.81   | 0.56          | 1.16            |
| PBCS2    | 8    | 0.424 0.435 | 593 833 328 457 711 271       | 1754 1439  | 1.91     | 0.3856567     | 2  | 1.12   | 0.95          | 1.31          | 1.09   | 0.89          | 1.33            |
| RADT     | 2    | 0.388 0.445 | 374 467 151 252 358 166       | 992 776    | 12.47    | 0.0019602     | 2  | 1.15   | 0.93          | 1.42          | 1.63   | 1.24          | 2.15            |
| WHS      | 18   | 0.411 0.427 | 234 316 115 225 311 128       | 665 664    | 0.93     | 0.629498      | 2  | 1.02   | 0.80          | 1.30          | 1.16   | 0.85          | 1.58            |
| PBCS 1+2 | 4    | 0.421 0.443 | 767 1079 410 648 1043 407     | 2256 2098  | 4.80     | 0.09065       | 2  | 1.14   | 1.00          | 1.31          | 1.18   | 0.99          | 1.40            |

Locus Alleles Chr Location Neighborhood  
rs2303659 G|A 11q24.3 129326474 PRDM10

| SUBSET   | Rank | MAF         | Geno Counts             | Subjects   | score X2 | score p-value | df | het OR | het OR 95% CI | het OR 95% CI | hom OR | hom OR 95% CI | hom OR 95% CI_u |
|----------|------|-------------|-------------------------|------------|----------|---------------|----|--------|---------------|---------------|--------|---------------|-----------------|
| STAGE1-3 | 5    | 0.035 0.028 | 9603 693 10 8879 500 14 | 10306 9393 | 18.88    | 7.94E-05      | 2  | 0.78   | 0.69          | 0.88          | 1.79   | 0.78          | 4.09            |
| NHS      | 22   | 0.034 0.024 | 1064 78 0 1089 56 0     | 1142 1145  |          |               |    |        |               |               |        |               |                 |
| STAGE1-2 | 18   | 0.034 0.025 | 4927 356 2 5166 271 3   | 5285 5440  | 15.25    | 0.0004891     | 2  | 0.72   | 0.61          | 0.85          | 1.25   | 0.21          | 7.61            |
| STAGE2   | 15   | 0.034 0.026 | 3863 278 2 4077 215 3   | 4143 4295  | 11.35    | 0.0034349     | 2  | 0.73   | 0.61          | 0.88          | 1.25   | 0.21          | 7.60            |
| CPSII    | 24   | 0.030 0.017 | 510 33 0 518 16 1       | 543 535    |          |               |    |        |               |               |        |               |                 |
| PBCS1    | 22   | 0.033 0.022 | 473 33 0 640 29 0       | 506 669    |          |               |    |        |               |               |        |               |                 |
| PLCO     | 15   | 0.036 0.028 | 906 68 1 895 52 1       | 975 948    | 2.09     | 0.3510362     | 2  | 0.76   | 0.53          | 1.11          | 0.58   | 0.03          | 10.04           |
| WHI      | 17   | 0.034 0.026 | 2245 163 1 2269 124 1   | 2409 2394  | 5.78     | 0.0557127     | 2  | 0.74   | 0.58          | 0.95          | 0.98   | 0.06          | 15.75           |
| STAGE3   | 6    | 0.035 0.032 | 4676 337 8 3714 229 11  | 5021 3954  | 5.49     | 0.0642218     | 2  | 0.85   | 0.72          | 1.01          | 1.98   | 0.79          | 5.00            |
| NHS2     | 2    | 0.039 0.025 | 1029 77 5 534 20 4      | 1111 558   | 8.05     | 0.0178454     | 2  | 0.50   | 0.30          | 0.83          | 1.55   | 0.42          | 5.81            |
| NOR      | 24   | 0.036 0.043 | 460 36 0 472 44 0       | 496 516    |          |               |    |        |               |               |        |               |                 |
| PBCS2    | 13   | 0.032 0.030 | 1648 112 1 1358 83 2    | 1761 1443  | 1.00     | 0.6056968     | 2  | 0.91   | 0.68          | 1.22          | 2.51   | 0.23          | 28.01           |
| RADT     | 24   | 0.037 0.035 | 920 74 0 723 54 0       | 994 777    |          |               |    |        |               |               |        |               |                 |
| WHS      | 7    | 0.032 0.029 | 619 38 2 627 28 5       | 659 660    | 2.80     | 0.2468477     | 2  | 0.73   | 0.44          | 1.20          | 2.45   | 0.47          | 12.70           |
| PBCS 1+2 | 9    | 0.032 0.027 | 2121 145 1 1997 112 2   | 2267 2111  | 2.59     | 0.2733992     | 2  | 0.83   | 0.64          | 1.07          | 2.39   | 0.22          | 26.51           |

Locus rs7121523 Alleles G|A Chr 11p15.4 Location Neighborhood 7556781 PPFIBP2

| SUBSET   | Rank | MAF         | Geno Counts                 | Subjects   | score X2 | score p-value | df | het OR | het OR 95% CI | het OR 95% CI | hom OR | hom OR 95% CI | hom OR 95% CI_u |
|----------|------|-------------|-----------------------------|------------|----------|---------------|----|--------|---------------|---------------|--------|---------------|-----------------|
| STAGE1-3 | 6    | 0.158 0.162 | 7275 2815 227 6636 2460 293 | 10317 9389 | 17.87    | 1.32E-04      | 2  | 0.96   | 0.90          | 1.02          | 1.42   | 1.19          | 1.70            |
| NHS      | 12   | 0.158 0.169 | 808 306 28 810 283 52       | 1142 1145  | 7.89     | 0.0193181     | 2  | 0.92   | 0.76          | 1.12          | 1.84   | 1.15          | 2.95            |
| STAGE1-2 | 1    | 0.155 0.163 | 3740 1443 99 3857 1390 191  | 5282 5438  | 30.04    | 3.00E-07      | 2  | 0.93   | 0.85          | 1.01          | 1.87   | 1.46          | 2.40            |
| STAGE2   | 1    | 0.154 0.161 | 2932 1137 71 3047 1107 139  | 4140 4293  | 22.20    | 1.51E-05      | 2  | 0.93   | 0.84          | 1.03          | 1.89   | 1.41          | 2.52            |
| CPSII    | 13   | 0.173 0.177 | 368 161 13 366 147 21       | 542 534    | 2.72     | 0.2563467     | 2  | 0.89   | 0.68          | 1.17          | 1.61   | 0.79          | 3.29            |
| PBCS1    | 8    | 0.138 0.156 | 373 123 8 481 165 22        | 504 668    | 3.59     | 0.1657869     | 2  | 0.99   | 0.75          | 1.30          | 2.17   | 0.95          | 4.98            |
| PLCO     | 12   | 0.156 0.166 | 688 270 17 661 259 28       | 975 948    | 2.93     | 0.2316154     | 2  | 0.98   | 0.80          | 1.21          | 1.69   | 0.91          | 3.14            |
| WHI      | 4    | 0.154 0.159 | 1704 664 40 1710 606 77     | 2408 2393  | 14.40    | 0.0007453     | 2  | 0.91   | 0.80          | 1.04          | 1.93   | 1.31          | 2.84            |
| STAGE3   | 23   | 0.162 0.161 | 3535 1372 127 2779 1071 102 | 5034 3952  | 0.09     | 0.9583588     | 2  | 0.99   | 0.90          | 1.09          | 1.03   | 0.79          | 1.35            |
| NHS2     | 11   | 0.167 0.159 | 777 314 30 402 141 19       | 1121 562   | 2.09     | 0.3520301     | 2  | 0.87   | 0.69          | 1.10          | 1.23   | 0.68          | 2.21            |
| NOR      | 22   | 0.172 0.177 | 342 136 17 347 147 17       | 495 511    | 0.18     | 0.9157125     | 2  | 1.06   | 0.80          | 1.40          | 0.97   | 0.48          | 1.93            |
| PBCS2    | 23   | 0.148 0.151 | 1266 440 38 1023 369 31     | 1744 1423  | 0.15     | 0.9280893     | 2  | 1.03   | 0.88          | 1.21          | 1.01   | 0.62          | 1.64            |
| RADT     | 18   | 0.177 0.172 | 668 301 25 527 223 21       | 994 771    | 0.39     | 0.8244529     | 2  | 0.94   | 0.77          | 1.16          | 1.08   | 0.59          | 1.95            |
| WHS      | 19   | 0.158 0.160 | 482 181 17 480 191 14       | 680 685    | 0.56     | 0.7576354     | 2  | 1.06   | 0.83          | 1.35          | 0.82   | 0.40          | 1.69            |
| PBCS 1+2 | 14   | 0.146 0.153 | 1639 563 47 1504 533 53     | 2249 2090  | 1.09     | 0.5784978     | 2  | 1.04   | 0.91          | 1.19          | 1.21   | 0.81          | 1.81            |

Locus rs17570439 Alleles T|C Chr 1p34.2 Location Neighborhood 40096797 TRIT1

| SUBSET   | Rank | MAF         | Geno Counts                 | Subjects   | score X2 | score p-value | df | het OR | het OR 95% CI | het OR 95% CI | hom OR | hom OR 95% CI | hom OR 95% CI_u |
|----------|------|-------------|-----------------------------|------------|----------|---------------|----|--------|---------------|---------------|--------|---------------|-----------------|
| STAGE1-3 | 7    | 0.209 0.226 | 6425 3413 446 5639 3268 487 | 10284 9394 | 16.69    | 2.37E-04      | 2  | 1.09   | 1.03          | 1.16          | 1.26   | 1.10          | 1.44            |
| NHS      | 5    | 0.204 0.244 | 719 381 42 654 424 67       | 1142 1145  | 12.25    | 0.002189      | 2  | 1.24   | 1.04          | 1.47          | 1.81   | 1.21          | 2.71            |
| STAGE1-2 | 13   | 0.208 0.229 | 3286 1798 201 3238 1908 291 | 5285 5437  | 19.06    | 7.27E-05      | 2  | 1.08   | 1.00          | 1.17          | 1.48   | 1.23          | 1.78            |
| STAGE2   | 18   | 0.209 0.225 | 2567 1417 159 2584 1484 224 | 4143 4292  | 9.85     | 0.0072467     | 2  | 1.04   | 0.95          | 1.14          | 1.40   | 1.13          | 1.73            |
| CPSII    | 6    | 0.196 0.218 | 343 187 13 329 179 27       | 543 535    | 5.32     | 0.069883      | 2  | 0.99   | 0.77          | 1.28          | 2.18   | 1.10          | 4.32            |
| PBCS1    | 15   | 0.210 0.222 | 310 179 17 406 228 34       | 506 668    | 2.25     | 0.324107      | 2  | 0.94   | 0.73          | 1.21          | 1.51   | 0.82          | 2.78            |
| PLCO     | 14   | 0.220 0.235 | 599 323 53 552 346 50       | 975 948    | 2.55     | 0.2792071     | 2  | 1.17   | 0.96          | 1.42          | 1.02   | 0.68          | 1.53            |
| WHI      | 9    | 0.206 0.226 | 1501 825 83 1438 829 125    | 2409 2392  | 9.81     | 0.0073981     | 2  | 1.05   | 0.93          | 1.19          | 1.57   | 1.18          | 2.10            |
| STAGE3   | 8    | 0.211 0.221 | 3139 1616 245 2400 1360 196 | 5000 3956  | 3.78     | 0.1513711     | 2  | 1.09   | 1.00          | 1.20          | 1.05   | 0.86          | 1.28            |
| NHS2     | 7    | 0.208 0.226 | 694 332 60 329 192 28       | 1086 549   | 3.43     | 0.1795429     | 2  | 1.23   | 0.98          | 1.53          | 0.98   | 0.62          | 1.57            |
| NOR      | 9    | 0.210 0.233 | 310 164 22 301 185 27       | 496 513    | 1.68     | 0.4327657     | 2  | 1.16   | 0.89          | 1.51          | 1.28   | 0.71          | 2.30            |
| PBCS2    | 18   | 0.208 0.216 | 1111 557 86 891 478 72      | 1754 1441  | 0.73     | 0.6925914     | 2  | 1.07   | 0.92          | 1.24          | 1.03   | 0.74          | 1.43            |
| RADT     | 12   | 0.218 0.221 | 607 344 45 476 258 43       | 996 777    | 1.33     | 0.5131199     | 2  | 0.97   | 0.79          | 1.18          | 1.26   | 0.81          | 1.95            |
| WHS      | 9    | 0.212 0.221 | 417 219 32 403 247 26       | 668 676    | 2.49     | 0.2885863     | 2  | 1.17   | 0.93          | 1.47          | 0.84   | 0.49          | 1.44            |
| PBCS 1+2 | 15   | 0.208 0.218 | 1421 735 103 1298 706 106   | 2259 2110  | 1.02     | 0.5998117     | 2  | 1.05   | 0.92          | 1.19          | 1.13   | 0.85          | 1.50            |

| Locus      | Alleles | Chr         | Location                    | Neighborhood         |          |               |    |        |               |               |        |               |               |                 |
|------------|---------|-------------|-----------------------------|----------------------|----------|---------------|----|--------|---------------|---------------|--------|---------------|---------------|-----------------|
| rs3134615  | G T     | 1p34.2      |                             | 40134653 TRIT1,MYCL1 |          |               |    |        |               |               |        |               |               |                 |
| SUBSET     | Rank    | MAF         | Geno Counts                 | Subjects             | score X2 | score p-value | df | het OR | het OR 95% CI | het OR 95% CI | hom OR | hom OR 95% CI | hom OR 95% CI | hom OR 95% CI_u |
| STAGE1-3   | 8       | 0.228 0.246 | 6153 3643 540 5335 3514 552 | 10336 9401           | 16.02    | 0.0003322     | 2  | 1.11   | 1.04          | 1.18          | 1.19   | 1.05          | 1.05          | 1.35            |
| NHS        | 2       | 0.220 0.263 | 690 402 50 617 454 74       | 1142 1145            | 13.26    | 0.0013224     | 2  | 1.28   | 1.07          | 1.52          | 1.72   | 1.18          | 1.18          | 2.51            |
| STAGE1-2   | 17      | 0.228 0.250 | 3134 1895 256 3048 2068 324 | 5285 5440            | 15.53    | 0.0004253     | 2  | 1.12   | 1.04          | 1.22          | 1.31   | 1.10          | 1.10          | 1.55            |
| STAGE2     | 22      | 0.230 0.246 | 2444 1493 206 2431 1614 250 | 4143 4295            | 6.01     | 0.0494166     | 2  | 1.09   | 0.99          | 1.19          | 1.22   | 1.00          | 1.00          | 1.48            |
| CPSII      | 8       | 0.215 0.236 | 326 200 17 313 192 30       | 543 535              | 4.10     | 0.1286891     | 2  | 1.00   | 0.78          | 1.29          | 1.87   | 1.00          | 1.00          | 3.47            |
| PBCS1      | 20      | 0.226 0.238 | 299 185 22 387 245 37       | 506 669              | 0.75     | 0.6881967     | 2  | 0.99   | 0.78          | 1.27          | 1.27   | 0.73          | 0.73          | 2.22            |
| PLCO       | 5       | 0.236 0.258 | 578 334 63 516 375 57       | 975 948              | 5.63     | 0.0597587     | 2  | 1.25   | 1.04          | 1.52          | 0.99   | 0.68          | 0.68          | 1.45            |
| WHI        | 19      | 0.229 0.248 | 1421 875 113 1349 904 141   | 2409 2394            | 5.46     | 0.0653218     | 2  | 1.09   | 0.97          | 1.23          | 1.31   | 1.01          | 1.01          | 1.70            |
| STAGE3     | 9       | 0.229 0.240 | 3019 1748 284 2287 1449 229 | 5051 3965            | 3.19     | 0.2029829     | 2  | 1.08   | 0.99          | 1.18          | 1.06   | 0.88          | 0.88          | 1.28            |
| NHS2       | 15      | 0.228 0.233 | 687 372 72 328 198 31       | 1131 557             | 1.43     | 0.4897763     | 2  | 1.12   | 0.90          | 1.39          | 0.90   | 0.58          | 0.58          | 1.40            |
| NOR        | 11      | 0.232 0.253 | 292 179 26 284 200 30       | 497 514              | 1.33     | 0.5148571     | 2  | 1.15   | 0.89          | 1.49          | 1.19   | 0.69          | 0.69          | 2.07            |
| PBCS2      | 19      | 0.226 0.231 | 1063 591 102 854 504 81     | 1756 1439            | 0.69     | 0.7071673     | 2  | 1.06   | 0.91          | 1.23          | 0.97   | 0.71          | 0.71          | 1.32            |
| RADT       | 10      | 0.240 0.246 | 567 373 51 445 276 52       | 991 773              | 1.99     | 0.3691299     | 2  | 0.96   | 0.78          | 1.17          | 1.29   | 0.86          | 0.86          | 1.94            |
| WHS        | 4       | 0.221 0.250 | 410 233 33 376 271 35       | 676 682              | 4.36     | 0.1132782     | 2  | 1.27   | 1.01          | 1.59          | 1.15   | 0.70          | 0.70          | 1.90            |
| PBCS 1+2   | 20      | 0.226 0.233 | 1362 776 124 1241 746 117   | 2262 2104            | 0.54     | 0.763415      | 2  | 1.05   | 0.92          | 1.19          | 1.04   | 0.80          | 0.80          | 1.36            |
| Locus      | Alleles | Chr         | Location                    | Neighborhood         |          |               |    |        |               |               |        |               |               |                 |
| rs10850145 | C T     | 12q24.13    |                             | 112428512            |          |               |    |        |               |               |        |               |               |                 |
| SUBSET     | Rank    | MAF         | Geno Counts                 | Subjects             | score X2 | score p-value | df | het OR | het OR 95% CI | het OR 95% CI | hom OR | hom OR 95% CI | hom OR 95% CI | hom OR 95% CI_u |
| STAGE1-3   | 9       | 0.095 0.106 | 8474 1786 86 7536 1776 110  | 10346 9422           | 15.39    | 0.0004547     | 2  | 1.12   | 1.04          | 1.20          | 1.47   | 1.11          | 1.11          | 1.96            |
| NHS        | 7       | 0.086 0.110 | 951 386 5 912 215 18        | 1142 1145            | 10.66    | 0.0048321     | 2  | 1.22   | 0.98          | 1.51          | 3.84   | 1.42          | 1.42          | 10.42           |
| STAGE1-2   | 16      | 0.089 0.107 | 4388 850 47 4340 1031 67    | 5285 5438            | 16.58    | 2.51E-04      | 2  | 1.21   | 1.10          | 1.34          | 1.42   | 0.98          | 0.98          | 2.07            |
| STAGE2     | 16      | 0.090 0.106 | 3437 664 42 3428 816 49     | 4143 4293            | 11.00    | 0.0040939     | 2  | 1.21   | 1.08          | 1.36          | 1.14   | 0.75          | 0.75          | 1.73            |
| CPSII      | 15      | 0.099 0.107 | 444 90 9 426 103 6          | 543 535              | 1.96     | 0.3753936     | 2  | 1.21   | 0.88          | 1.65          | 0.68   | 0.24          | 0.24          | 1.96            |
| PBCS1      | 9       | 0.094 0.113 | 417 83 6 523 141 5          | 506 669              | 3.52     | 0.1723655     | 2  | 1.31   | 0.97          | 1.79          | 0.71   | 0.21          | 0.21          | 2.36            |
| PLCO       | 9       | 0.077 0.094 | 832 135 8 775 167 6         | 975 948              | 4.40     | 0.1108021     | 2  | 1.29   | 1.01          | 1.66          | 0.75   | 0.26          | 0.26          | 2.19            |
| WHI        | 13      | 0.094 0.111 | 1982 403 24 1898 459 35     | 2409 2392            | 7.09     | 0.0288232     | 2  | 1.19   | 1.02          | 1.38          | 1.51   | 0.89          | 0.89          | 2.56            |
| STAGE3     | 7       | 0.100 0.104 | 4086 937 39 3198 745 43     | 5062 3986            | 4.78     | 0.0917167     | 2  | 1.02   | 0.91          | 1.13          | 1.62   | 1.05          | 1.05          | 2.52            |
| NHS2       | 4       | 0.103 0.105 | 905 207 12 456 92 13        | 1124 561             | 4.82     | 0.0897536     | 2  | 0.88   | 0.67          | 1.16          | 2.15   | 0.97          | 0.97          | 4.76            |
| NOR        | 23      | 0.081 0.090 | 414 80 0 426 82 5           | 494 513              |          |               |    |        |               |               |        |               |               |                 |
| PBCS2      | 15      | 0.104 0.108 | 1412 338 15 1152 282 16     | 1765 1450            | 0.95     | 0.622126      | 2  | 1.02   | 0.86          | 1.22          | 1.41   | 0.69          | 0.69          | 2.88            |
| RADT       | 23      | 0.105 0.106 | 799 184 12 622 146 9        | 995 777              | 0.01     | 0.9956746     | 2  | 1.01   | 0.79          | 1.29          | 0.97   | 0.41          | 0.41          | 2.34            |
| WHS        | 24      | 0.094 0.104 | 556 128 0 542 143 0         | 684 685              |          |               |    |        |               |               |        |               |               |                 |
| PBCS 1+2   | 11      | 0.102 0.110 | 1829 420 21 1673 423 21     | 2270 2117            | 1.81     | 0.4050423     | 2  | 1.11   | 0.95          | 1.29          | 1.11   | 0.60          | 0.60          | 2.06            |
| Locus      | Alleles | Chr         | Location                    | Neighborhood         |          |               |    |        |               |               |        |               |               |                 |
| rs2067980  | A G     | 5p12        |                             | 45018074             |          |               |    |        |               |               |        |               |               |                 |
| SUBSET     | Rank    | MAF         | Geno Counts                 | Subjects             | score X2 | score p-value | df | het OR | het OR 95% CI | het OR 95% CI | hom OR | hom OR 95% CI | hom OR 95% CI | hom OR 95% CI_u |
| STAGE1-3   | 10      | 0.159 0.173 | 7305 2730 274 6459 2624 308 | 10309 9391           | 13.39    | 0.0012355     | 2  | 1.08   | 1.02          | 1.15          | 1.29   | 1.09          | 1.09          | 1.52            |
| NHS        | 11      | 0.151 0.178 | 814 311 17 769 342 33       | 1142 1144            | 8.23     | 0.0163487     | 2  | 1.17   | 0.98          | 1.41          | 2.07   | 1.14          | 1.14          | 3.75            |
| STAGE1-2   | 8       | 0.150 0.173 | 3805 1375 105 3737 1522 180 | 5285 5439            | 22.37    | 1.39E-05      | 2  | 1.12   | 1.02          | 1.22          | 1.70   | 1.33          | 1.33          | 2.17            |
| STAGE2     | 10      | 0.150 0.172 | 2991 1064 88 2968 1180 147  | 4143 4295            | 14.92    | 0.0005752     | 2  | 1.10   | 1.00          | 1.21          | 1.62   | 1.24          | 1.24          | 2.13            |
| CPSII      | 18      | 0.159 0.164 | 383 147 13 377 140 18       | 543 535              | 0.74     | 0.6922465     | 2  | 0.96   | 0.73          | 1.26          | 1.33   | 0.64          | 0.64          | 2.77            |
| PBCS1      | 5       | 0.191 0.227 | 335 149 22 400 234 35       | 506 669              | 4.69     | 0.0957398     | 2  | 1.31   | 1.01          | 1.69          | 1.30   | 0.74          | 0.74          | 2.29            |
| PLCO       | 13      | 0.144 0.166 | 714 241 20 658 265 25       | 975 948              | 2.90     | 0.2350723     | 2  | 1.18   | 0.96          | 1.45          | 1.27   | 0.69          | 0.69          | 2.32            |
| WHI        | 6       | 0.143 0.161 | 1761 606 42 1700 616 78     | 2409 2394            | 11.83    | 0.0027031     | 2  | 1.05   | 0.92          | 1.20          | 1.92   | 1.31          | 1.31          | 2.81            |
| STAGE3     | 16      | 0.169 0.172 | 3500 1356 169 2722 1105 128 | 5025 3955            | 0.97     | 0.6141958     | 2  | 1.05   | 0.95          | 1.15          | 1.00   | 0.79          | 0.79          | 1.27            |
| NHS2       | 16      | 0.169 0.156 | 777 292 42 394 140 16       | 1111 550             | 1.04     | 0.59377       | 2  | 0.95   | 0.75          | 1.20          | 0.75   | 0.42          | 0.42          | 1.35            |
| NOR        | 18      | 0.142 0.135 | 364 125 8 382 127 6         | 497 515              | 0.63     | 0.7293478     | 2  | 0.95   | 0.72          | 1.27          | 0.66   | 0.23          | 0.23          | 1.95            |
| PBCS2      | 21      | 0.190 0.192 | 1158 519 73 941 441 55      | 1750 1437            | 0.51     | 0.7741054     | 2  | 1.05   | 0.90          | 1.22          | 0.94   | 0.66          | 0.66          | 1.35            |
| RADT       | 5       | 0.155 0.177 | 713 256 26 530 216 29       | 995 775              | 3.61     | 0.1645402     | 2  | 1.13   | 0.91          | 1.40          | 1.58   | 0.92          | 0.92          | 2.72            |

|          |    |             |                          |           |      |           |   |      |      |      |      |      |      |
|----------|----|-------------|--------------------------|-----------|------|-----------|---|------|------|------|------|------|------|
| WHS      | 17 | 0.152 0.166 | 488 164 20 475 181 22    | 672 678   | 1.09 | 0.5804781 | 2 | 1.13 | 0.89 | 1.45 | 1.13 | 0.61 | 2.10 |
| PBCS 1+2 | 10 | 0.190 0.203 | 1493 667 95 1341 672 190 | 2255 2103 | 2.47 | 0.2909593 | 2 | 1.11 | 0.97 | 1.27 | 1.04 | 0.77 | 1.41 |

Locus rs998592 Alleles Chr Location Neighborhood  
G|A 16p13.13 11107179 CLEC16A

| SUBSET   | Rank | MAF         | Geno Counts                   | Subjects   | score X2 | score p-value | df | het OR | het OR 95% CI | het OR 95% CI | hom OR | hom OR 95% CI | hom OR 95% CI_u |
|----------|------|-------------|-------------------------------|------------|----------|---------------|----|--------|---------------|---------------|--------|---------------|-----------------|
| STAGE1-3 | 11   | 0.424 0.413 | 3455 4960 1895 3179 4677 1549 | 10310 9405 | 12.97    | 0.0015299     | 2  | 1.02   | 0.96          | 1.09          | 0.89   | 0.82          | 0.96            |
| NHS      | 1    | 0.425 0.431 | 405 502 233 349 605 191       | 1140 1145  | 17.78    | 1.38E-04      | 2  | 1.40   | 1.16          | 1.68          | 0.95   | 0.75          | 1.20            |
| STAGE1-2 | 10   | 0.436 0.419 | 1716 2524 1043 1778 2767 895  | 5283 5440  | 20.78    | 3.07E-05      | 2  | 1.06   | 0.98          | 1.16          | 0.83   | 0.75          | 0.93            |
| STAGE2   | 13   | 0.440 0.416 | 1311 2022 810 1429 2162 704   | 4143 4295  | 13.62    | 0.0011014     | 2  | 0.99   | 0.89          | 1.09          | 0.80   | 0.71          | 0.91            |
| CPSII    | 2    | 0.475 0.415 | 158 254 131 184 258 93        | 543 535    | 7.85     | 0.019768      | 2  | 0.87   | 0.66          | 1.15          | 0.62   | 0.44          | 0.87            |
| PBCS1    | 1    | 0.415 0.369 | 186 220 100 264 316 89        | 506 669    | 7.49     | 0.0236278     | 2  | 1.01   | 0.78          | 1.31          | 0.65   | 0.46          | 0.91            |
| PLCO     | 22   | 0.419 0.411 | 324 485 166 320 476 152       | 975 948    | 0.31     | 0.854972      | 2  | 0.99   | 0.81          | 1.21          | 0.93   | 0.71          | 1.22            |
| WHI      | 20   | 0.450 0.433 | 729 1192 488 743 1229 422     | 2409 2394  | 5.45     | 0.0656693     | 2  | 1.01   | 0.89          | 1.15          | 0.85   | 0.72          | 1.00            |
| STAGE3   | 19   | 0.412 0.406 | 1739 2436 853 1402 1912 654   | 5028 3968  | 0.41     | 0.8157005     | 2  | 0.98   | 0.89          | 1.08          | 0.96   | 0.85          | 1.09            |
| NHS2     | 20   | 0.417 0.427 | 378 542 193 187 267 105       | 1113 559   | 0.52     | 0.7691791     | 2  | 1.00   | 0.79          | 1.25          | 1.10   | 0.82          | 1.48            |
| NOR      | 21   | 0.390 0.400 | 186 231 77 187 245 84         | 494 516    | 0.19     | 0.9090974     | 2  | 1.05   | 0.80          | 1.37          | 1.08   | 0.74          | 1.56            |
| PBCS2    | 22   | 0.400 0.394 | 625 849 274 528 682 223       | 1748 1433  | 0.46     | 0.7929432     | 2  | 0.95   | 0.81          | 1.11          | 0.95   | 0.77          | 1.18            |
| RADT     | 8    | 0.439 0.415 | 313 490 192 268 373 136       | 995 777    | 2.25     | 0.324737      | 2  | 0.88   | 0.71          | 1.09          | 0.82   | 0.63          | 1.09            |
| WHS      | 14   | 0.412 0.408 | 237 324 117 232 345 106       | 678 683    | 1.25     | 0.5359649     | 2  | 1.09   | 0.86          | 1.38          | 0.93   | 0.67          | 1.28            |
| PBCS 1+2 | 8    | 0.403 0.386 | 811 1069 373 791 996 312      | 2253 2099  | 2.68     | 0.2623506     | 2  | 0.96   | 0.84          | 1.10          | 0.86   | 0.72          | 1.03            |

Locus rs2391406 Alleles Chr Location Neighborhood  
T|G 13q33.3 106586873

| SUBSET   | Rank | MAF         | Geno Counts                   | Subjects   | score X2 | score p-value | df | het OR | het OR 95% CI | het OR 95% CI | hom OR | hom OR 95% CI | hom OR 95% CI_u |
|----------|------|-------------|-------------------------------|------------|----------|---------------|----|--------|---------------|---------------|--------|---------------|-----------------|
| STAGE1-3 | 12   | 0.371 0.364 | 4130 4683 1470 3746 4431 1190 | 10283 9367 | 12.52    | 0.0019082     | 2  | 1.04   | 0.98          | 1.10          | 0.89   | 0.81          | 0.97            |
| NHS      | 20   | 0.372 0.363 | 452 529 160 460 538 146       | 1141 1144  | 0.85     | 0.6553259     | 2  | 1.02   | 0.85          | 1.21          | 0.90   | 0.70          | 1.17            |
| STAGE1-2 | 9    | 0.375 0.359 | 2110 2378 789 2188 2594 652   | 5277 5434  | 20.86    | 2.96E-05      | 2  | 1.05   | 0.96          | 1.14          | 0.80   | 0.71          | 0.90            |
| STAGE2   | 2    | 0.376 0.358 | 1658 1849 629 1728 2056 506   | 4136 4290  | 21.76    | 1.88E-05      | 2  | 1.06   | 0.96          | 1.16          | 0.77   | 0.67          | 0.88            |
| CPSII    | 4    | 0.371 0.333 | 217 240 79 228 251 51         | 536 530    | 7.06     | 0.0293625     | 2  | 0.99   | 0.77          | 1.29          | 0.60   | 0.40          | 0.90            |
| PBCS1    | 2    | 0.387 0.374 | 195 230 81 242 351 74         | 506 667    | 7.05     | 0.0294556     | 2  | 1.20   | 0.93          | 1.56          | 0.75   | 0.52          | 1.09            |
| PLCO     | 2    | 0.376 0.350 | 398 416 157 393 445 109       | 971 947    | 8.80     | 0.0122686     | 2  | 1.07   | 0.88          | 1.30          | 0.70   | 0.53          | 0.93            |
| WHI      | 14   | 0.372 0.360 | 971 1084 353 966 1133 295     | 2408 2394  | 6.25     | 0.0439343     | 2  | 1.05   | 0.93          | 1.18          | 0.84   | 0.70          | 1.00            |
| STAGE3   | 21   | 0.366 0.370 | 2020 2309 681 1558 1839 538   | 5010 3935  | 0.24     | 0.8853137     | 2  | 1.02   | 0.93          | 1.12          | 1.02   | 0.89          | 1.16            |
| NHS2     | 3    | 0.341 0.379 | 493 477 140 216 265 80        | 1110 561   | 5.37     | 0.0680617     | 2  | 1.27   | 1.02          | 1.58          | 1.31   | 0.95          | 1.79            |
| NOR      | 8    | 0.366 0.372 | 207 214 74 201 245 69         | 495 515    | 1.89     | 0.3886415     | 2  | 1.18   | 0.90          | 1.54          | 0.96   | 0.65          | 1.41            |
| PBCS2    | 20   | 0.380 0.382 | 656 853 236 542 686 203       | 1745 1431  | 0.63     | 0.7284602     | 2  | 0.97   | 0.83          | 1.13          | 1.05   | 0.84          | 1.31            |
| RADT     | 17   | 0.359 0.365 | 410 454 130 309 368 99        | 994 776    | 0.58     | 0.7483976     | 2  | 1.08   | 0.88          | 1.32          | 1.00   | 0.74          | 1.35            |
| WHS      | 1    | 0.385 0.344 | 254 311 101 290 275 87        | 666 652    | 5.51     | 0.0636181     | 2  | 0.77   | 0.61          | 0.98          | 0.75   | 0.54          | 1.05            |
| PBCS 1+2 | 16   | 0.381 0.379 | 851 1079 317 784 1035 277     | 2247 2096  | 0.96     | 0.6172901     | 2  | 1.04   | 0.92          | 1.19          | 0.96   | 0.79          | 1.16            |

Locus rs17740709 Alleles Chr Location Neighborhood  
A|G 12q21.31 81947471 TMT2

| SUBSET   | Rank | MAF         | Geno Counts                 | Subjects   | score X2 | score p-value | df | het OR | het OR 95% CI | het OR 95% CI | hom OR | hom OR 95% CI | hom OR 95% CI_u |
|----------|------|-------------|-----------------------------|------------|----------|---------------|----|--------|---------------|---------------|--------|---------------|-----------------|
| STAGE1-3 | 13   | 0.220 0.215 | 6248 3554 485 5841 3051 491 | 10287 9383 | 12.06    | 0.0024046     | 2  | 0.91   | 0.86          | 0.97          | 1.08   | 0.95          | 1.24            |
| NHS      | 15   | 0.218 0.212 | 692 402 48 725 355 65       | 1142 1145  | 6.73     | 0.0344968     | 2  | 0.84   | 0.70          | 1.00          | 1.32   | 0.90          | 1.95            |
| STAGE1-2 | 6    | 0.218 0.214 | 3201 1869 215 3403 1742 295 | 5285 5440  | 22.82    | 1.11E-05      | 2  | 0.87   | 0.80          | 0.94          | 1.29   | 1.08          | 1.55            |
| STAGE2   | 8    | 0.217 0.215 | 2509 1467 167 2678 1387 230 | 4143 4295  | 16.25    | 2.96E-04      | 2  | 0.88   | 0.80          | 0.96          | 1.29   | 1.04          | 1.58            |
| CPSII    | 11   | 0.215 0.200 | 328 197 18 343 170 22       | 543 535    | 2.96     | 0.2281211     | 2  | 0.81   | 0.63          | 1.05          | 1.17   | 0.61          | 2.24            |
| PBCS1    | 6    | 0.242 0.247 | 282 203 21 383 241 45       | 506 669    | 4.36     | 0.1129269     | 2  | 0.89   | 0.70          | 1.14          | 1.60   | 0.93          | 2.77            |
| PLCO     | 17   | 0.214 0.203 | 603 326 46 610 291 47       | 975 948    | 1.91     | 0.3854003     | 2  | 0.87   | 0.72          | 1.06          | 0.98   | 0.64          | 1.51            |
| WHI      | 8    | 0.215 0.212 | 1466 851 92 1504 764 126    | 2409 2394  | 10.45    | 0.0053913     | 2  | 0.87   | 0.77          | 0.99          | 1.33   | 1.01          | 1.76            |
| STAGE3   | 14   | 0.222 0.216 | 3047 1686 270 2439 1311 196 | 5003 3946  | 1.32     | 0.515731      | 2  | 0.97   | 0.89          | 1.06          | 0.90   | 0.74          | 1.10            |
| NHS2     | 17   | 0.210 0.209 | 694 349 56 342 183 23       | 1099 548   | 0.95     | 0.6224631     | 2  | 1.06   | 0.85          | 1.33          | 0.83   | 0.50          | 1.38            |

|          |    |             |                           |           |      |           |   |      |      |      |      |      |      |
|----------|----|-------------|---------------------------|-----------|------|-----------|---|------|------|------|------|------|------|
| NOR      | 4  | 0.243 0.205 | 281 187 27 328 161 25     | 495 514   | 5.20 | 0.0742045 | 2 | 0.74 | 0.57 | 0.96 | 0.80 | 0.45 | 1.41 |
| PBCS2    | 17 | 0.234 0.240 | 1042 597 112 836 508 91   | 1751 1435 | 0.78 | 0.6787361 | 2 | 1.07 | 0.92 | 1.24 | 1.04 | 0.77 | 1.39 |
| RADT     | 11 | 0.212 0.195 | 612 339 41 501 250 27     | 992 778   | 1.86 | 0.3954103 | 2 | 0.88 | 0.72 | 1.08 | 0.82 | 0.50 | 1.36 |
| WHS      | 20 | 0.212 0.200 | 418 214 34 432 209 30     | 666 671   | 0.53 | 0.7685189 | 2 | 0.95 | 0.75 | 1.19 | 0.85 | 0.51 | 1.42 |
| PBCS 1+2 | 19 | 0.236 0.243 | 1324 799 133 1218 747 136 | 2256 2101 | 0.76 | 0.6844904 | 2 | 1.00 | 0.88 | 1.14 | 1.12 | 0.87 | 1.44 |

Locus rs12622050 Alleles G|A Chr 2q11.2 Location 100945886 Neighborhood NPAS2

| SUBSET   | Rank | MAF         | Geno Counts                 | Subjects   | score X2 | score p-value | df | het OR | het OR 95% CI | het OR 95% CI | hom OR | hom OR 95% I | hom OR 95% CI_u |
|----------|------|-------------|-----------------------------|------------|----------|---------------|----|--------|---------------|---------------|--------|--------------|-----------------|
| STAGE1-3 | 14   | 0.223 0.212 | 6195 3596 493 5841 3084 449 | 10284 9374 | 11.50    | 0.0031813     | 2  | 0.90   | 0.85          | 0.96          | 0.96   | 0.84         | 1.10            |
| NHS      | 16   | 0.220 0.189 | 695 392 55 754 349 42       | 1142 1145  | 6.36     | 0.0416035     | 2  | 0.82   | 0.69          | 0.98          | 0.71   | 0.47         | 1.07            |
| STAGE1-2 | 14   | 0.220 0.201 | 3183 1875 227 3482 1721 235 | 5285 5438  | 18.93    | 7.75E-05      | 2  | 0.83   | 0.77          | 0.91          | 0.93   | 0.77         | 1.13            |
| STAGE2   | 11   | 0.220 0.205 | 2488 1483 172 2728 1372 193 | 4143 4293  | 14.71    | 0.0006407     | 2  | 0.84   | 0.76          | 0.92          | 1.00   | 0.81         | 1.24            |
| CPSII    | 3    | 0.217 0.205 | 323 203 16 341 165 27       | 542 533    | 7.67     | 0.021643      | 2  | 0.75   | 0.58          | 0.97          | 1.56   | 0.82         | 2.97            |
| PBCS1    | 11   | 0.244 0.239 | 284 197 25 391 235 42       | 506 668    | 2.83     | 0.2430167     | 2  | 0.85   | 0.66          | 1.08          | 1.23   | 0.72         | 2.08            |
| PLCO     | 8    | 0.229 0.199 | 577 350 48 606 307 35       | 975 948    | 4.99     | 0.0824924     | 2  | 0.84   | 0.70          | 1.02          | 0.68   | 0.43         | 1.08            |
| WHI      | 11   | 0.213 0.196 | 1476 838 95 1557 734 102    | 2409 2393  | 9.37     | 0.0092175     | 2  | 0.83   | 0.73          | 0.94          | 1.01   | 0.76         | 1.35            |
| STAGE3   | 24   | 0.225 0.227 | 3013 1723 266 2360 1365 213 | 5002 3938  | 0.06     | 0.9681537     | 2  | 0.99   | 0.90          | 1.08          | 1.01   | 0.83         | 1.22            |
| NHS2     | 12   | 0.200 0.204 | 712 332 53 344 181 21       | 1097 546   | 1.98     | 0.3715158     | 2  | 1.13   | 0.91          | 1.41          | 0.82   | 0.49         | 1.39            |
| NOR      | 16   | 0.221 0.219 | 297 179 20 314 175 25       | 496 514    | 0.77     | 0.681121      | 2  | 0.92   | 0.71          | 1.20          | 1.17   | 0.64         | 2.16            |
| PBCS2    | 24   | 0.252 0.258 | 980 644 117 793 540 99      | 1741 1432  | 0.14     | 0.9315483     | 2  | 1.02   | 0.88          | 1.18          | 1.05   | 0.79         | 1.39            |
| RADT     | 14   | 0.206 0.205 | 626 327 41 495 242 38       | 994 775    | 0.92     | 0.6314772     | 2  | 0.94   | 0.77          | 1.15          | 1.17   | 0.74         | 1.85            |
| WHS      | 15   | 0.231 0.214 | 398 241 35 414 227 30       | 674 671    | 1.12     | 0.5699063     | 2  | 0.90   | 0.72          | 1.14          | 0.82   | 0.50         | 1.37            |
| PBCS 1+2 | 21   | 0.250 0.252 | 1263 839 142 1183 773 142   | 2244 2098  | 0.52     | 0.7706926     | 2  | 0.99   | 0.87          | 1.12          | 1.08   | 0.84         | 1.39            |

Locus rs10941679 Alleles A|G Chr 5p12 Location 44742255 Neighborhood

| SUBSET   | Rank | MAF         | Geno Counts                 | Subjects  | score X2 | score p-value | df | het OR | het OR 95% CI | het OR 95% CI | hom OR | hom OR 95% I | hom OR 95% CI_u |
|----------|------|-------------|-----------------------------|-----------|----------|---------------|----|--------|---------------|---------------|--------|--------------|-----------------|
| STAGE1-3 | 15   | 0.259 0.280 | 3015 2105 370 2365 1859 351 | 5490 4575 | 10.39    | 0.0055424     | 2  | 1.12   | 1.03          | 1.22          | 1.20   | 1.03         | 1.41            |
| STAGE3   | 2    | 0.259 0.278 | 2759 1911 343 2048 1601 295 | 5013 3944 | 8.41     | 0.0149113     | 2  | 1.13   | 1.03          | 1.23          | 1.16   | 0.98         | 1.38            |
| NHS2     | 10   | 0.256 0.280 | 607 415 73 286 220 44       | 1095 550  | 2.12     | 0.3458398     | 2  | 1.13   | 0.91          | 1.40          | 1.28   | 0.86         | 1.91            |
| NOR      | 12   | 0.303 0.282 | 239 213 44 265 210 40       | 496 515   | 1.27     | 0.5290934     | 2  | 0.89   | 0.69          | 1.15          | 0.81   | 0.51         | 1.29            |
| PBCS2    | 2    | 0.259 0.276 | 969 667 121 737 605 94      | 1757 1436 | 5.56     | 0.0621397     | 2  | 1.19   | 1.03          | 1.38          | 1.05   | 0.79         | 1.40            |
| RADT     | 1    | 0.236 0.290 | 575 373 49 395 307 71       | 997 773   | 16.06    | 0.0003264     | 2  | 1.20   | 0.98          | 1.47          | 2.14   | 1.45         | 3.15            |
| WHS      | 11   | 0.266 0.262 | 369 243 56 365 259 46       | 668 670   | 1.52     | 0.4672395     | 2  | 1.08   | 0.86          | 1.35          | 0.83   | 0.55         | 1.26            |
| PBCS 1+2 | 2    | 0.259 0.281 | 1225 861 148 1054 863 150   | 2234 2067 | 6.16     | 0.0459654     | 2  | 1.16   | 1.03          | 1.32          | 1.17   | 0.92         | 1.50            |

Locus rs9491859 Alleles C|A Chr 6q22.33 Location 128106056 Neighborhood C6orf190

| SUBSET   | Rank | MAF         | Geno Counts                   | Subjects   | score X2 | score p-value | df | het OR | het OR 95% CI | het OR 95% CI | hom OR | hom OR 95% I | hom OR 95% CI_u |
|----------|------|-------------|-------------------------------|------------|----------|---------------|----|--------|---------------|---------------|--------|--------------|-----------------|
| STAGE1-3 | 16   | 0.355 0.370 | 4295 4686 1313 3761 4282 1328 | 10294 9371 | 10.18    | 0.0061722     | 2  | 1.04   | 0.98          | 1.11          | 1.16   | 1.06         | 1.26            |
| NHS      | 13   | 0.356 0.381 | 459 552 130 447 523 175       | 1141 1145  | 7.22     | 0.0270581     | 2  | 0.97   | 0.81          | 1.16          | 1.37   | 1.05         | 1.78            |
| STAGE1-2 | 5    | 0.349 0.375 | 2226 2433 625 2178 2443 817   | 5284 5438  | 23.45    | 8.08E-06      | 2  | 1.03   | 0.95          | 1.12          | 1.34   | 1.18         | 1.51            |
| STAGE2   | 7    | 0.346 0.373 | 1767 1881 495 1731 1920 642   | 4143 4293  | 17.07    | 1.96E-04      | 2  | 1.04   | 0.95          | 1.15          | 1.33   | 1.16         | 1.52            |
| CPSII    | 10   | 0.350 0.339 | 220 266 57 238 231 66         | 543 535    | 3.58     | 0.167089      | 2  | 0.80   | 0.62          | 1.04          | 1.06   | 0.71         | 1.58            |
| PBCS1    | 18   | 0.345 0.356 | 216 231 59 287 287 94         | 506 668    | 1.29     | 0.5236214     | 2  | 0.92   | 0.72          | 1.19          | 1.14   | 0.78         | 1.66            |
| PLCO     | 4    | 0.333 0.374 | 437 427 111 378 430 140       | 975 948    | 6.65     | 0.0359321     | 2  | 1.16   | 0.96          | 1.41          | 1.44   | 1.08         | 1.92            |
| WHI      | 7    | 0.351 0.383 | 1018 1093 298 933 1089 371    | 2409 2393  | 11.40    | 0.0033427     | 2  | 1.08   | 0.96          | 1.23          | 1.36   | 1.14         | 1.62            |
| STAGE3   | 10   | 0.362 0.364 | 2070 2257 688 1584 1840 511   | 5015 3935  | 2.60     | 0.2718635     | 2  | 1.06   | 0.97          | 1.16          | 0.97   | 0.85         | 1.11            |
| NHS2     | 24   | 0.368 0.367 | 459 501 163 226 249 79        | 1123 554   | 0.02     | 0.9880898     | 2  | 1.01   | 0.81          | 1.26          | 0.99   | 0.72         | 1.35            |
| NOR      | 13   | 0.372 0.371 | 200 212 75 200 232 70         | 487 502    | 1.05     | 0.5915189     | 2  | 1.11   | 0.84          | 1.45          | 0.93   | 0.63         | 1.36            |
| PBCS2    | 16   | 0.349 0.349 | 744 779 218 599 660 169       | 1741 1428  | 0.83     | 0.6597734     | 2  | 1.05   | 0.90          | 1.22          | 0.95   | 0.76         | 1.19            |
| RADT     | 16   | 0.374 0.366 | 391 459 141 311 366 102       | 991 779    | 0.62     | 0.7348216     | 2  | 0.99   | 0.80          | 1.21          | 0.89   | 0.66         | 1.20            |
| WHS      | 8    | 0.363 0.383 | 276 306 91 248 333 91         | 673 672    | 2.70     | 0.2587927     | 2  | 1.21   | 0.96          | 1.53          | 1.11   | 0.79         | 1.56            |

PBCS 1+2 24 0.348|0.351 959|1006|277|885|946|263 2242|2094 0.12 0.9409957 2 1.02 0.90 1.16 1.02 0.84 1.24

Locus Alleles Chr Location Neighborhood  
rs1274466 T|C 10p11.21 34510210 PAR3

| SUBSET   | Rank | MAF         | Geno Counts                   | Subjects   | score X2 | score p-value | df | het OR | het OR 95% CI | het OR 95% CI | hom OR | hom OR 95% CI | hom OR 95% CI_u |
|----------|------|-------------|-------------------------------|------------|----------|---------------|----|--------|---------------|---------------|--------|---------------|-----------------|
| STAGE1-3 | 17   | 0.448 0.433 | 3162 5069 2091 3036 4591 1771 | 10322 9398 | 9.27     | 0.0096863     | 2  | 0.94   | 0.88          | 1.01          | 0.88   | 0.81          | 0.96            |
| NHS      | 17   | 0.470 0.439 | 312 586 244 357 569 218       | 1142 1144  | 4.43     | 0.1092557     | 2  | 0.85   | 0.70          | 1.03          | 0.79   | 0.62          | 1.00            |
| STAGE1-2 | 20   | 0.454 0.430 | 1574 2619 1092 1768 2664 1006 | 5285 5438  | 13.19    | 0.0013687     | 2  | 0.90   | 0.83          | 0.99          | 0.82   | 0.73          | 0.91            |
| STAGE2   | 19   | 0.450 0.427 | 1262 2033 848 1411 2095 788   | 4143 4294  | 9.24     | 0.009866      | 2  | 0.92   | 0.83          | 1.01          | 0.83   | 0.73          | 0.94            |
| CPSII    | 12   | 0.471 0.436 | 152 271 120 172 259 104       | 543 535    | 2.74     | 0.2537532     | 2  | 0.84   | 0.63          | 1.10          | 0.76   | 0.54          | 1.07            |
| PBCS1    | 10   | 0.483 0.446 | 138 247 121 200 340 128       | 506 668    | 3.14     | 0.2084452     | 2  | 0.97   | 0.74          | 1.28          | 0.76   | 0.54          | 1.06            |
| PLCO     | 10   | 0.449 0.419 | 298 478 199 319 464 165       | 975 948    | 4.04     | 0.1327715     | 2  | 0.89   | 0.73          | 1.09          | 0.77   | 0.59          | 0.99            |
| WHI      | 23   | 0.443 0.424 | 755 1175 479 803 1153 438     | 2409 2394  | 3.47     | 0.176377      | 2  | 0.92   | 0.81          | 1.05          | 0.86   | 0.73          | 1.01            |
| STAGE3   | 20   | 0.442 0.437 | 1588 2454 1000 1269 1929 767  | 5042 3965  | 0.32     | 0.8540489     | 2  | 0.99   | 0.90          | 1.09          | 0.97   | 0.86          | 1.09            |
| NHS2     | 19   | 0.440 0.436 | 363 535 227 175 278 104       | 1125 557   | 0.92     | 0.6315455     | 2  | 1.08   | 0.85          | 1.36          | 0.95   | 0.71          | 1.28            |
| NOR      | 9    | 0.391 0.401 | 184 235 76 188 240 86         | 495 514    | 0.35     | 0.8412894     | 2  | 1.01   | 0.77          | 1.32          | 1.11   | 0.77          | 1.61            |
| PBCS2    | 7    | 0.457 0.441 | 518 863 368 456 695 287       | 1749 1438  | 1.91     | 0.3852815     | 2  | 0.91   | 0.78          | 1.07          | 0.88   | 0.72          | 1.07            |
| RADT     | 15   | 0.454 0.444 | 295 489 205 243 378 156       | 989 777    | 0.66     | 0.7180856     | 2  | 0.93   | 0.75          | 1.16          | 0.90   | 0.69          | 1.18            |
| WHS      | 12   | 0.424 0.446 | 228 332 124 207 338 134       | 684 679    | 1.44     | 0.4877259     | 2  | 1.12   | 0.88          | 1.43          | 1.19   | 0.87          | 1.62            |
| PBCS 1+2 | 5    | 0.463 0.442 | 656 1106 488 655 1033 413     | 2250 2101  | 4.34     | 0.1143707     | 2  | 0.93   | 0.81          | 1.06          | 0.83   | 0.70          | 0.99            |

Locus Alleles Chr Location Neighborhood  
rs724244 C|T 3p24.1 27217157 NEK10

| SUBSET   | Rank | MAF         | Geno Counts                 | Subjects  | score X2 | score p-value | df | het OR | het OR 95% CI | het OR 95% CI | hom OR | hom OR 95% CI | hom OR 95% CI_u |
|----------|------|-------------|-----------------------------|-----------|----------|---------------|----|--------|---------------|---------------|--------|---------------|-----------------|
| STAGE1-3 | 18   | 0.261 0.275 | 5011 3522 635 4351 3283 626 | 9168 8260 | 8.55     | 0.0139378     | 2  | 1.07   | 1.01          | 1.14          | 1.15   | 1.02          | 1.30            |
| STAGE1-2 | 12   | 0.252 0.281 | 2304 1588 250 2220 1730 341 | 4142 4291 | 19.83    | 4.95E-05      | 2  | 1.14   | 1.04          | 1.25          | 1.42   | 1.19          | 1.69            |
| STAGE2   | 3    | 0.252 0.281 | 2304 1588 250 2220 1730 341 | 4142 4291 | 19.84    | 4.92E-05      | 2  | 1.14   | 1.04          | 1.25          | 1.42   | 1.19          | 1.69            |
| CPSII    | 16   | 0.247 0.273 | 309 198 35 287 202 45       | 542 534   | 1.89     | 0.3890061     | 2  | 1.12   | 0.87          | 1.45          | 1.34   | 0.83          | 2.15            |
| PBCS1    | 19   | 0.246 0.265 | 293 177 36 368 245 54       | 506 667   | 1.17     | 0.5566168     | 2  | 1.12   | 0.87          | 1.43          | 1.21   | 0.77          | 1.92            |
| PLCO     | 1    | 0.230 0.291 | 569 364 42 481 381 85       | 975 947   | 21.56    | 2.09E-05      | 2  | 1.26   | 1.04          | 1.52          | 2.39   | 1.61          | 3.54            |
| WHI      | 21   | 0.263 0.283 | 1302 949 158 1217 998 179   | 2409 2394 | 5.21     | 0.0738251     | 2  | 1.12   | 1.00          | 1.27          | 1.21   | 0.96          | 1.52            |
| STAGE3   | 18   | 0.269 0.267 | 2707 1938 385 2132 1554 285 | 5030 3971 | 0.49     | 0.7810077     | 2  | 1.01   | 0.93          | 1.11          | 0.96   | 0.81          | 1.13            |
| NHS2     | 14   | 0.269 0.281 | 611 397 100 293 218 48      | 1108 559  | 1.57     | 0.4568389     | 2  | 1.14   | 0.92          | 1.42          | 1.00   | 0.69          | 1.45            |
| NOR      | 17   | 0.248 0.264 | 276 192 27 278 204 34       | 495 516   | 0.68     | 0.7135123     | 2  | 1.06   | 0.82          | 1.37          | 1.23   | 0.72          | 2.10            |
| PBCS2    | 10   | 0.273 0.261 | 926 696 131 778 567 92      | 1753 1437 | 1.57     | 0.4554409     | 2  | 0.97   | 0.84          | 1.12          | 0.83   | 0.63          | 1.11            |
| RADT     | 20   | 0.273 0.267 | 524 397 73 418 302 56       | 994 776   | 0.24     | 0.8851413     | 2  | 0.95   | 0.78          | 1.16          | 0.97   | 0.67          | 1.42            |
| WHS      | 23   | 0.268 0.273 | 370 256 54 365 263 55       | 680 683   | 0.12     | 0.9411771     | 2  | 1.04   | 0.83          | 1.30          | 1.03   | 0.69          | 1.54            |
| PBCS 1+2 | 22   | 0.267 0.262 | 1219 869 167 1145 811 146   | 2255 2102 | 0.48     | 0.7881142     | 2  | 1.01   | 0.89          | 1.14          | 0.93   | 0.73          | 1.17            |

Locus Alleles Chr Location Neighborhood  
rs11077820 T|C 17q25.1 71966263 UBE2O,AANAT

| SUBSET   | Rank | MAF         | Geno Counts                   | Subjects   | score X2 | score p-value | df | het OR | het OR 95% CI | het OR 95% CI | hom OR | hom OR 95% CI | hom OR 95% CI_u |
|----------|------|-------------|-------------------------------|------------|----------|---------------|----|--------|---------------|---------------|--------|---------------|-----------------|
| STAGE1-3 | 19   | 0.371 0.365 | 4056 4814 1411 3845 4226 1308 | 10281 9379 | 7.37     | 0.0250979     | 2  | 0.92   | 0.87          | 0.98          | 0.97   | 0.89          | 1.06            |
| NHS      | 14   | 0.382 0.370 | 429 553 160 475 492 178       | 1142 1145  | 7.15     | 0.0279917     | 2  | 0.79   | 0.66          | 0.95          | 0.98   | 0.76          | 1.26            |
| STAGE1-2 | 4    | 0.383 0.367 | 1953 2611 715 2229 2429 778   | 5279 5436  | 25.87    | 2.42E-06      | 2  | 0.81   | 0.75          | 0.88          | 0.94   | 0.83          | 1.06            |
| STAGE2   | 5    | 0.383 0.366 | 1524 2058 555 1754 1937 600   | 4137 4291  | 19.03    | 7.39E-05      | 2  | 0.81   | 0.74          | 0.89          | 0.93   | 0.81          | 1.06            |
| CPSII    | 14   | 0.377 0.374 | 216 242 83 205 260 70         | 541 535    | 2.25     | 0.3252166     | 2  | 1.15   | 0.89          | 1.50          | 0.89   | 0.61          | 1.30            |
| PBCS1    | 17   | 0.375 0.353 | 193 244 67 284 298 87         | 504 669    | 1.66     | 0.4360376     | 2  | 0.85   | 0.66          | 1.09          | 0.89   | 0.61          | 1.30            |
| PLCO     | 11   | 0.371 0.355 | 371 484 120 395 430 121       | 975 946    | 3.84     | 0.1469509     | 2  | 0.82   | 0.68          | 1.00          | 0.92   | 0.68          | 1.23            |
| WHI      | 2    | 0.385 0.374 | 871 1215 320 962 1071 359     | 2406 2392  | 15.81    | 0.0003692     | 2  | 0.80   | 0.70          | 0.90          | 1.01   | 0.84          | 1.21            |
| STAGE3   | 11   | 0.359 0.362 | 2103 2202 697 1617 1799 530   | 5002 3946  | 2.57     | 0.2760269     | 2  | 1.07   | 0.98          | 1.17          | 1.00   | 0.88          | 1.14            |
| NHS2     | 23   | 0.364 0.374 | 446 495 150 219 253 80        | 1091 552   | 0.30     | 0.8625921     | 2  | 1.04   | 0.83          | 1.30          | 1.09   | 0.79          | 1.49            |
| NOR      | 7    | 0.329 0.316 | 225 216 55 233 237 44         | 496 514    | 1.95     | 0.3769285     | 2  | 1.05   | 0.81          | 1.37          | 0.77   | 0.50          | 1.20            |
| PBCS2    | 6    | 0.359 0.375 | 732 784 238 563 671 204       | 1754 1438  | 2.06     | 0.3569089     | 2  | 1.11   | 0.95          | 1.29          | 1.12   | 0.90          | 1.39            |

|          |    |             |                          |           |      |           |   |      |      |      |      |      |      |
|----------|----|-------------|--------------------------|-----------|------|-----------|---|------|------|------|------|------|------|
| RADT     | 21 | 0.371 0.380 | 405 441 148 303 353 118  | 994 774   | 0.24 | 0.8874426 | 2 | 1.05 | 0.86 | 1.29 | 1.03 | 0.78 | 1.38 |
| WHS      | 6  | 0.358 0.339 | 295 266 106 299 285 84   | 667 668   | 3.26 | 0.1960254 | 2 | 1.06 | 0.84 | 1.33 | 0.78 | 0.56 | 1.08 |
| PBCS 1+2 | 23 | 0.362 0.368 | 925 1029 304 846 967 291 | 2258 2104 | 0.26 | 0.8785093 | 2 | 1.02 | 0.90 | 1.16 | 1.05 | 0.87 | 1.26 |

Locus rs37936 Alleles A|G Chr 7q21.11 Location Neighborhood 79806994

| SUBSET   | Rank | MAF         | Geno Counts                   | Subjects   | score X2 | score p-value | df | het OR | het OR 95% CI | het OR 95% CI | hom OR | hom OR 95% CI | hom OR 95% CI_u |
|----------|------|-------------|-------------------------------|------------|----------|---------------|----|--------|---------------|---------------|--------|---------------|-----------------|
| STAGE1-3 | 20   | 0.384 0.371 | 3916 4697 1559 3704 4197 1330 | 10172 9231 | 6.95     | 0.0308978     | 2  | 0.94   | 0.89          | 1.00          | 0.90   | 0.82          | 0.98            |
| NHS      | 6    | 0.400 0.365 | 403 541 178 474 476 171       | 1122 1121  | 10.73    | 0.0046803     | 2  | 0.74   | 0.62          | 0.89          | 0.80   | 0.62          | 1.03            |
| STAGE1-2 | 11   | 0.400 0.368 | 1731 2149 797 1897 2074 674   | 4677 4645  | 20.55    | 3.44E-05      | 2  | 0.88   | 0.80          | 0.96          | 0.76   | 0.68          | 0.86            |
| STAGE2   | 9    | 0.400 0.369 | 1328 1608 619 1423 1598 503   | 3555 3524  | 15.92    | 0.0003484     | 2  | 0.92   | 0.84          | 1.02          | 0.75   | 0.65          | 0.87            |
| CPSII    | 22   | 0.387 0.373 | 199 251 79 202 249 70         | 529 521    | 0.39     | 0.8208258     | 2  | 0.98   | 0.76          | 1.28          | 0.89   | 0.61          | 1.30            |
| PLCO     | 21   | 0.378 0.376 | 379 431 146 373 394 147       | 956 914    | 0.71     | 0.6994731     | 2  | 0.92   | 0.76          | 1.13          | 1.00   | 0.76          | 1.32            |
| WHI      | 1    | 0.409 0.368 | 857 1064 430 933 1084 316     | 2351 2333  | 21.16    | 2.55E-05      | 2  | 0.93   | 0.82          | 1.06          | 0.67   | 0.57          | 0.80            |
| STAGE3   | 17   | 0.371 0.377 | 1992 2333 700 1552 1840 573   | 5025 3965  | 0.67     | 0.7146396     | 2  | 1.01   | 0.93          | 1.11          | 1.06   | 0.93          | 1.20            |
| NHS2     | 8    | 0.366 0.398 | 457 508 157 212 261 96        | 1122 569   | 3.27     | 0.1947394     | 2  | 1.11   | 0.89          | 1.38          | 1.32   | 0.97          | 1.78            |
| NOR      | 14   | 0.364 0.345 | 202 227 67 221 233 61         | 496 515    | 0.94     | 0.6246957     | 2  | 0.93   | 0.72          | 1.22          | 0.82   | 0.55          | 1.23            |
| PBCS2    | 5    | 0.368 0.364 | 706 782 248 568 669 183       | 1736 1420  | 2.48     | 0.2890305     | 2  | 1.07   | 0.92          | 1.24          | 0.90   | 0.72          | 1.12            |
| RADT     | 6    | 0.393 0.403 | 356 496 143 283 364 132       | 995 779    | 2.38     | 0.3045417     | 2  | 0.94   | 0.76          | 1.15          | 1.16   | 0.87          | 1.55            |
| WHS      | 13   | 0.362 0.378 | 271 320 85 268 313 101        | 676 682    | 1.42     | 0.4911797     | 2  | 0.99   | 0.78          | 1.24          | 1.20   | 0.86          | 1.68            |
| PBCS 1+2 | 12   | 0.367 0.364 | 899 997 310 823 952 266       | 2206 2041  | 1.53     | 0.4642402     | 2  | 1.05   | 0.92          | 1.19          | 0.93   | 0.77          | 1.13            |

Locus rs12608723 Alleles A|G Chr 19q13.11 Location Neighborhood 38508973

| SUBSET   | Rank | MAF         | Geno Counts                  | Subjects   | score X2 | score p-value | df | het OR | het OR 95% CI | het OR 95% CI | hom OR | hom OR 95% CI | hom OR 95% CI_u |
|----------|------|-------------|------------------------------|------------|----------|---------------|----|--------|---------------|---------------|--------|---------------|-----------------|
| STAGE1-3 | 21   | 0.136 0.128 | 7735 2378 2177 1555 2085 163 | 10330 9403 | 6.94     | 0.0311332     | 2  | 0.94   | 0.88          | 1.01          | 0.80   | 0.65          | 0.99            |
| NHS      | 9    | 0.153 0.123 | 819 296 27 877 252 15        | 1142 1144  | 9.79     | 0.0074816     | 2  | 0.79   | 0.65          | 0.96          | 0.50   | 0.26          | 0.94            |
| STAGE1-2 | 19   | 0.143 0.126 | 3888 1281 116 4158 1190 91   | 5285 5439  | 13.27    | 0.0013148     | 2  | 0.87   | 0.79          | 0.95          | 0.73   | 0.56          | 0.97            |
| STAGE2   | 21   | 0.140 0.127 | 3069 985 89 3281 938 76      | 4143 4295  | 6.30     | 0.0428818     | 2  | 0.89   | 0.80          | 0.99          | 0.81   | 0.59          | 1.10            |
| CPSII    | 9    | 0.140 0.120 | 398 138 7 417 108 10         | 543 535    | 3.66     | 0.1602449     | 2  | 0.77   | 0.58          | 1.03          | 1.39   | 0.52          | 3.72            |
| PBCS1    | 13   | 0.153 0.129 | 364 129 13 510 146 13        | 506 669    | 2.47     | 0.2913249     | 2  | 0.81   | 0.62          | 1.07          | 0.75   | 0.34          | 1.66            |
| PLCO     | 20   | 0.132 0.124 | 738 216 21 732 196 20        | 975 948    | 0.79     | 0.6733434     | 2  | 0.90   | 0.73          | 1.13          | 1.00   | 0.53          | 1.87            |
| WHI      | 22   | 0.141 0.128 | 1783 572 54 1818 540 36      | 2409 2394  | 4.82     | 0.089933      | 2  | 0.93   | 0.81          | 1.06          | 0.65   | 0.43          | 1.00            |
| STAGE3   | 15   | 0.129 0.132 | 3849 1100 101 2997 901 72    | 5050 3970  | 1.11     | 0.5749959     | 2  | 1.04   | 0.94          | 1.15          | 0.91   | 0.66          | 1.23            |
| NHS2     | 21   | 0.126 0.123 | 869 243 21 433 113 12        | 1133 558   | 0.49     | 0.7825961     | 2  | 0.93   | 0.72          | 1.20          | 1.15   | 0.56          | 2.36            |
| NOR      | 1    | 0.128 0.167 | 380 103 12 356 148 12        | 495 516    | 8.52     | 0.014114      | 2  | 1.54   | 1.15          | 2.06          | 1.11   | 0.49          | 2.52            |
| PBCS2    | 14   | 0.124 0.118 | 1344 368 32 1120 300 20      | 1744 1440  | 0.97     | 0.6157104     | 2  | 0.97   | 0.82          | 1.16          | 0.76   | 0.43          | 1.34            |
| RADT     | 22   | 0.138 0.142 | 736 239 17 573 191 15        | 992 779    | 0.06     | 0.9724619     | 2  | 1.00   | 0.80          | 1.25          | 1.09   | 0.54          | 2.21            |
| WHS      | 16   | 0.135 0.129 | 520 147 19 515 149 13        | 686 677    | 1.10     | 0.5758936     | 2  | 1.02   | 0.79          | 1.33          | 0.69   | 0.34          | 1.41            |
| PBCS 1+2 | 7    | 0.130 0.120 | 1706 494 45 1630 440 33      | 2245 2103  | 2.78     | 0.2492348     | 2  | 0.92   | 0.80          | 1.07          | 0.74   | 0.47          | 1.16            |

Locus rs3817198 Alleles T|C Chr 11p15.5 Location Neighborhood 1865582 LSP1

| SUBSET   | Rank | MAF         | Geno Counts                   | Subjects   | score X2 | score p-value | df | het OR | het OR 95% CI | het OR 95% CI | hom OR | hom OR 95% CI | hom OR 95% CI_u |
|----------|------|-------------|-------------------------------|------------|----------|---------------|----|--------|---------------|---------------|--------|---------------|-----------------|
| STAGE1-3 | 22   | 0.322 0.332 | 4732 4516 1068 4222 4118 1068 | 10316 9408 | 5.46     | 0.0651028     | 2  | 1.02   | 0.96          | 1.08          | 1.12   | 1.02          | 1.23            |
| NHS      | 19   | 0.318 0.330 | 524 510 108 514 505 125       | 1142 1144  | 1.25     | 0.5355728     | 2  | 1.01   | 0.85          | 1.21          | 1.17   | 0.88          | 1.56            |
| STAGE1-2 | 23   | 0.325 0.341 | 2407 2312 562 2371 2415 643   | 5281 5429  | 5.19     | 0.0745837     | 2  | 1.06   | 0.98          | 1.15          | 1.15   | 1.01          | 1.31            |
| STAGE2   | 23   | 0.327 0.344 | 1883 1802 454 1857 1910 518   | 4139 4285  | 4.32     | 0.1156018     | 2  | 1.07   | 0.98          | 1.17          | 1.15   | 0.99          | 1.32            |
| CPSII    | 21   | 0.334 0.345 | 243 231 64 235 227 70         | 538 532    | 0.47     | 0.792476      | 2  | 1.02   | 0.79          | 1.32          | 1.14   | 0.78          | 1.69            |
| PBCS1    | 21   | 0.319 0.333 | 229 228 47 292 299 71         | 504 662    | 0.55     | 0.7587576     | 2  | 1.00   | 0.78          | 1.28          | 1.16   | 0.77          | 1.76            |
| PLCO     | 6    | 0.335 0.344 | 440 417 118 397 449 101       | 975 947    | 5.38     | 0.0679398     | 2  | 1.19   | 0.99          | 1.45          | 0.88   | 0.65          | 1.20            |
| WHI      | 18   | 0.326 0.346 | 1097 1051 260 1047 1038 309   | 2408 2394  | 5.64     | 0.0595026     | 2  | 1.04   | 0.92          | 1.17          | 1.25   | 1.04          | 1.51            |
| STAGE3   | 12   | 0.319 0.322 | 2324 2205 506 1845 1706 426   | 5035 3977  | 1.67     | 0.4343521     | 2  | 0.98   | 0.89          | 1.07          | 1.07   | 0.93          | 1.24            |
| NHS2     | 13   | 0.317 0.311 | 518 491 109 277 232 61        | 1118 570   | 1.67     | 0.4332142     | 2  | 0.88   | 0.71          | 1.09          | 1.05   | 0.74          | 1.48            |



|          |    |             |                           |           |      |           |   |      |      |      |      |      |      |
|----------|----|-------------|---------------------------|-----------|------|-----------|---|------|------|------|------|------|------|
| NOR      | 6  | 0.262 0.290 | 269 194 33 258 215 42     | 496 515   | 2.10 | 0.3496641 | 2 | 1.16 | 0.90 | 1.50 | 1.33 | 0.82 | 2.17 |
| PBCS2    | 12 | 0.330 0.339 | 789 789 189 634 637 171   | 1767 1442 | 1.08 | 0.5823481 | 2 | 1.00 | 0.86 | 1.16 | 1.13 | 0.89 | 1.42 |
| RADT     | 9  | 0.338 0.317 | 442 434 119 366 331 81    | 995 778   | 2.13 | 0.3447019 | 2 | 0.91 | 0.74 | 1.11 | 0.80 | 0.59 | 1.10 |
| WHS      | 10 | 0.310 0.322 | 306 297 56 310 291 71     | 659 672   | 1.73 | 0.421129  | 2 | 0.97 | 0.77 | 1.21 | 1.25 | 0.85 | 1.84 |
| PBCS 1+2 | 13 | 0.328 0.336 | 1019 1016 236 932 933 241 | 2271 2106 | 1.43 | 0.4888131 | 2 | 1.01 | 0.89 | 1.14 | 1.13 | 0.92 | 1.38 |

Locus rs7936636 Alleles C|T Chr 11p11.2 Location 44397546 Neighborhood 44397546

| SUBSET   | Rank | MAF         | Geno Counts                 | Subjects   | score X2 | score p-value | df | het OR | het OR 95% CI | het OR 95% CI | hom OR | hom OR 95% CI | hom OR 95% CI_u |
|----------|------|-------------|-----------------------------|------------|----------|---------------|----|--------|---------------|---------------|--------|---------------|-----------------|
| STAGE1-3 | 23   | 0.254 0.246 | 5706 3954 643 5366 3460 582 | 10303 9408 | 5.46     | 0.0652593     | 2  | 0.93   | 0.88          | 0.99          | 0.97   | 0.86          | 1.09            |
| NHS      | 18   | 0.256 0.240 | 635 430 77 673 395 77       | 1142 1145  | 2.67     | 0.2634246     | 2  | 0.86   | 0.73          | 1.03          | 0.94   | 0.68          | 1.32            |
| STAGE1-2 | 15   | 0.263 0.244 | 2852 2086 344 3144 1940 355 | 5282 5439  | 17.24    | 1.80E-04      | 2  | 0.84   | 0.78          | 0.91          | 0.94   | 0.80          | 1.10            |
| STAGE2   | 12   | 0.264 0.245 | 2217 1656 267 2471 1545 278 | 4140 4294  | 14.70    | 0.0006433     | 2  | 0.84   | 0.77          | 0.92          | 0.94   | 0.79          | 1.12            |
| CPSII    | 1    | 0.266 0.233 | 286 224 32 323 175 37       | 542 535    | 8.60     | 0.0135835     | 2  | 0.69   | 0.53          | 0.89          | 1.01   | 0.61          | 1.67            |
| PBCS1    | 12   | 0.247 0.226 | 284 193 28 406 222 40       | 505 668    | 2.70     | 0.2595978     | 2  | 0.81   | 0.63          | 1.04          | 0.99   | 0.59          | 1.66            |
| PLCO     | 7    | 0.263 0.249 | 526 385 64 546 332 70       | 975 948    | 5.06     | 0.0797279     | 2  | 0.81   | 0.67          | 0.98          | 1.05   | 0.73          | 1.51            |
| WHI      | 12   | 0.270 0.247 | 1272 973 163 1358 890 146   | 2408 2394  | 7.34     | 0.02545       | 2  | 0.86   | 0.76          | 0.96          | 0.84   | 0.66          | 1.07            |
| STAGE3   | 13   | 0.246 0.249 | 2854 1868 299 2222 1521 226 | 5021 3969  | 1.46     | 0.4813519     | 2  | 1.05   | 0.97          | 1.15          | 1.00   | 0.83          | 1.20            |
| NHS2     | 5    | 0.266 0.235 | 598 438 77 330 197 33       | 1113 560   | 4.11     | 0.1278142     | 2  | 0.82   | 0.66          | 1.01          | 0.78   | 0.50          | 1.19            |
| NOR      | 2    | 0.192 0.237 | 326 153 19 301 185 30       | 498 516    | 6.54     | 0.0379589     | 2  | 1.32   | 1.01          | 1.72          | 1.75   | 0.96          | 3.19            |
| PBCS2    | 3    | 0.245 0.264 | 993 643 105 769 569 94      | 1741 1432  | 3.46     | 0.1771562     | 2  | 1.14   | 0.98          | 1.32          | 1.16   | 0.86          | 1.55            |
| RADT     | 7    | 0.254 0.240 | 553 376 64 442 301 37       | 993 780    | 2.30     | 0.316387      | 2  | 1.00   | 0.82          | 1.22          | 0.72   | 0.47          | 1.11            |
| WHS      | 22   | 0.241 0.244 | 384 258 34 380 269 32       | 676 681    | 0.29     | 0.8651925     | 2  | 1.05   | 0.84          | 1.32          | 0.95   | 0.58          | 1.57            |
| PBCS 1+2 | 18   | 0.245 0.252 | 1277 836 133 1175 790 135   | 2246 2100  | 0.85     | 0.6546002     | 2  | 1.04   | 0.91          | 1.18          | 1.11   | 0.86          | 1.44            |

Locus rs4666451 Alleles G|A Chr 2p24.1 Location 19150424 Neighborhood 19150424

| SUBSET   | Rank | MAF         | Geno Counts                   | Subjects  | score X2 | score p-value | df | het OR | het OR 95% CI | het OR 95% CI | hom OR | hom OR 95% CI | hom OR 95% CI_u |
|----------|------|-------------|-------------------------------|-----------|----------|---------------|----|--------|---------------|---------------|--------|---------------|-----------------|
| STAGE1-3 | 24   | 0.391 0.382 | 3412 4325 1424 3148 3915 1197 | 9161 8260 | 4.15     | 0.1254081     | 2  | 0.97   | 0.91          | 1.04          | 0.91   | 0.83          | 1.00            |
| STAGE1-2 | 22   | 0.398 0.376 | 1509 1968 666 1657 2045 593   | 4143 4295 | 10.70    | 0.0047469     | 2  | 0.94   | 0.86          | 1.03          | 0.81   | 0.71          | 0.92            |
| STAGE2   | 17   | 0.398 0.376 | 1509 1968 666 1657 2045 593   | 4143 4295 | 10.16    | 0.006234      | 2  | 0.94   | 0.86          | 1.03          | 0.81   | 0.71          | 0.92            |
| CPSII    | 7    | 0.394 0.400 | 201 256 86 177 288 70         | 543 535   | 4.69     | 0.0959408     | 2  | 1.26   | 0.96          | 1.64          | 0.90   | 0.62          | 1.31            |
| PBCS1    | 14   | 0.409 0.380 | 176 246 84 257 316 96         | 506 669   | 2.36     | 0.3075885     | 2  | 0.84   | 0.65          | 1.09          | 0.79   | 0.55          | 1.13            |
| PLCO     | 16   | 0.393 0.373 | 355 474 146 363 462 123       | 975 948   | 1.92     | 0.3821783     | 2  | 0.94   | 0.77          | 1.14          | 0.82   | 0.62          | 1.09            |
| WHI      | 15   | 0.397 0.372 | 890 1125 394 950 1105 339     | 2409 2394 | 6.00     | 0.0498254     | 2  | 0.92   | 0.81          | 1.04          | 0.81   | 0.68          | 0.96            |
| STAGE3   | 22   | 0.386 0.388 | 1905 2358 758 1491 1874 604   | 5021 3969 | 0.13     | 0.9390528     | 2  | 1.01   | 0.93          | 1.11          | 1.02   | 0.90          | 1.16            |
| NHS2     | 22   | 0.382 0.384 | 428 504 169 211 263 82        | 1101 556  | 0.36     | 0.8365835     | 2  | 1.06   | 0.85          | 1.32          | 0.98   | 0.72          | 1.34            |
| NOR      | 20   | 0.363 0.355 | 201 230 65 214 238 64         | 496 516   | 0.26     | 0.8785451     | 2  | 0.96   | 0.74          | 1.26          | 0.90   | 0.61          | 1.35            |
| PBCS2    | 9    | 0.399 0.411 | 621 858 268 504 692 247       | 1747 1443 | 1.70     | 0.4270595     | 2  | 1.00   | 0.85          | 1.16          | 1.13   | 0.92          | 1.40            |
| RADT     | 13   | 0.382 0.370 | 389 452 154 309 358 108       | 995 775   | 1.17     | 0.5559348     | 2  | 1.00   | 0.81          | 1.22          | 0.86   | 0.64          | 1.15            |
| WHS      | 21   | 0.380 0.390 | 266 314 102 253 323 103       | 682 679   | 0.45     | 0.7973041     | 2  | 1.08   | 0.86          | 1.36          | 1.06   | 0.77          | 1.47            |
| PBCS 1+2 | 17   | 0.402 0.401 | 795 1103 352 761 1004 343     | 2250 2108 | 0.95     | 0.6220754     | 2  | 0.95   | 0.84          | 1.09          | 1.03   | 0.86          | 1.23            |

adj\_trend

Locus rs11249433 Alleles T|C Chr 1p11.2 Location 120982136 Neighborhood LOC647121

| SUBSET   | Rank | MAF         | Geno Counts                   | Subjects   | score X2 | score p-value | df | het OR | het OR 95% CI | het OR 95% CI | hom OR | hom OR 95% CI | hom OR 95% CI_u |
|----------|------|-------------|-------------------------------|------------|----------|---------------|----|--------|---------------|---------------|--------|---------------|-----------------|
| STAGE1-3 | 1    | 0.393 0.426 | 3826 4800 1637 3102 4520 1713 | 10263 9335 | 41.85    | 9.83E-11      | 1  | 1.14   | 1.10          | 1.19          | 1.31   | 1.20          | 1.42            |
| NHS      | 2    | 0.388 0.440 | 425 541 170 358 563 220       | 1136 1141  | 12.57    | 0.0003917     | 1  | 1.24   | 1.10          | 1.40          | 1.54   | 1.21          | 1.95            |
| STAGE1-2 | 4    | 0.403 0.432 | 1899 2492 874 1732 2693 994   | 5265 5419  | 20.17    | 7.10E-06      | 1  | 1.13   | 1.07          | 1.20          | 1.28   | 1.15          | 1.43            |
| STAGE2   | 8    | 0.407 0.430 | 1474 1951 704 1374 2130 774   | 4129 4278  | 10.43    | 0.001238      | 1  | 1.11   | 1.04          | 1.18          | 1.22   | 1.08          | 1.39            |
| CPSII    | 5    | 0.378 0.417 | 220 235 88 178 267 89         | 543 534    | 2.90     | 0.0885359     | 1  | 1.16   | 0.98          | 1.38          | 1.35   | 0.96          | 1.90            |
| PBCS1    | 21   | 0.387 0.393 | 195 230 81 243 326 100        | 506 669    | 0.12     | 0.7244935     | 1  | 1.03   | 0.87          | 1.22          | 1.06   | 0.76          | 1.49            |
| PLCO     | 23   | 0.420 0.421 | 324 476 169 315 465 165       | 969 945    | 0.00     | 0.9928868     | 1  | 1.00   | 0.88          | 1.14          | 1.00   | 0.77          | 1.30            |

|          |   |             |                             |           |       |           |   |      |      |      |      |      |      |
|----------|---|-------------|-----------------------------|-----------|-------|-----------|---|------|------|------|------|------|------|
| WHI      | 2 | 0.407 0.444 | 857 1133 411 727 1192 462   | 2401 2381 | 13.67 | 2.17E-04  | 1 | 1.17 | 1.07 | 1.26 | 1.36 | 1.15 | 1.60 |
| STAGE3   | 1 | 0.383 0.417 | 1931 2310 763 1370 1827 719 | 5004 3916 | 21.48 | 3.58E-06  | 1 | 1.15 | 1.09 | 1.22 | 1.33 | 1.18 | 1.50 |
| NHS2     | 1 | 0.395 0.446 | 418 522 182 179 251 120     | 1122 550  | 7.75  | 0.0053649 | 1 | 1.23 | 1.06 | 1.41 | 1.50 | 1.13 | 2.00 |
| NOR      | 7 | 0.380 0.408 | 184 242 66 180 244 86       | 492 510   | 1.43  | 0.2313927 | 1 | 1.12 | 0.93 | 1.34 | 1.25 | 0.87 | 1.80 |
| PBCS2    | 1 | 0.362 0.398 | 719 778 240 518 661 231     | 1737 1410 | 9.44  | 0.002127  | 1 | 1.17 | 1.06 | 1.30 | 1.38 | 1.12 | 1.69 |
| USRT     | 5 | 0.385 0.410 | 387 443 159 271 371 132     | 989 774   | 2.50  | 0.1138912 | 1 | 1.11 | 0.97 | 1.28 | 1.24 | 0.95 | 1.63 |
| WHS      | 3 | 0.419 0.446 | 223 325 116 222 300 150     | 664 672   | 1.91  | 0.1664305 | 1 | 1.11 | 0.96 | 1.29 | 1.24 | 0.92 | 1.67 |
| PBCS 1+2 | 1 | 0.368 0.397 | 910 1006 321 761 987 331    | 2237 2079 | 7.06  | 0.0078915 | 1 | 1.12 | 1.03 | 1.23 | 1.26 | 1.06 | 1.50 |

Locus Alleles Chr Location Neighborhood  
rs999737 C|T 14q24.1 68104435 RAD51L1

| SUBSET   | Rank | MAF         | Geno Counts                 | Subjects   | score X2 | score p-value | df | het OR | het OR 95% CI | het OR 95% CI | hom OR | hom OR 95% CI | hom OR 95% CI_u |
|----------|------|-------------|-----------------------------|------------|----------|---------------|----|--------|---------------|---------------|--------|---------------|-----------------|
| STAGE1-3 | 2    | 0.239 0.218 | 6009 3649 640 5718 3255 422 | 10298 9395 | 23.79    | 1.07E-06      | 1  | 0.89   | 0.85          | 0.93          | 0.79   | 0.72          | 0.87            |
| NHS      | 11   | 0.244 0.213 | 660 406 76 703 394 47       | 1142 1144  | 6.25     | 0.0124524     | 1  | 0.84   | 0.73          | 0.96          | 0.70   | 0.53          | 0.93            |
| STAGE1-2 | 2    | 0.239 0.212 | 3092 1863 330 3354 1858 226 | 5285 5438  | 20.91    | 4.81E-06      | 1  | 0.86   | 0.81          | 0.92          | 0.74   | 0.65          | 0.84            |
| STAGE2   | 2    | 0.237 0.212 | 2432 1457 254 2651 1464 179 | 4143 4294  | 14.87    | 1.15E-04      | 1  | 0.87   | 0.81          | 0.93          | 0.75   | 0.65          | 0.87            |
| CPSII    | 14   | 0.235 0.222 | 319 193 31 325 182 28       | 543 535    | 0.53     | 0.4645326     | 1  | 0.93   | 0.76          | 1.14          | 0.86   | 0.57          | 1.29            |
| PBCS1    | 6    | 0.242 0.213 | 291 185 30 409 234 25       | 506 668    | 2.68     | 0.1018883     | 1  | 0.85   | 0.69          | 1.03          | 0.72   | 0.48          | 1.07            |
| PLCO     | 5    | 0.238 0.215 | 576 334 65 576 336 36       | 975 948    | 2.87     | 0.0900572     | 1  | 0.88   | 0.75          | 1.02          | 0.77   | 0.57          | 1.04            |
| WHI      | 5    | 0.235 0.209 | 1416 854 139 1492 801 101   | 2409 2394  | 8.69     | 0.0031977     | 1  | 0.86   | 0.78          | 0.95          | 0.75   | 0.62          | 0.91            |
| STAGE3   | 4    | 0.240 0.226 | 2918 1789 310 2366 1399 195 | 5017 3960  | 5.19     | 0.0226667     | 1  | 0.92   | 0.86          | 0.99          | 0.85   | 0.74          | 0.98            |
| NHS2     | 14   | 0.234 0.226 | 664 362 77 336 187 32       | 1103 555   | 0.24     | 0.6266698     | 1  | 0.96   | 0.81          | 1.13          | 0.92   | 0.66          | 1.28            |
| NOR      | 3    | 0.257 0.215 | 271 195 30 319 171 25       | 496 515    | 5.13     | 0.023573      | 1  | 0.79   | 0.64          | 0.97          | 0.62   | 0.41          | 0.94            |
| PBCS2    | 8    | 0.236 0.226 | 1016 637 94 850 514 66      | 1747 1430  | 0.98     | 0.3232239     | 1  | 0.94   | 0.84          | 1.06          | 0.89   | 0.70          | 1.13            |
| USRT     | 14   | 0.243 0.232 | 572 357 62 459 275 43       | 991 777    | 0.24     | 0.6220236     | 1  | 0.96   | 0.82          | 1.12          | 0.92   | 0.68          | 1.26            |
| WHS      | 7    | 0.244 0.227 | 395 238 47 402 252 29       | 680 683    | 1.11     | 0.2922478     | 1  | 0.91   | 0.76          | 1.09          | 0.83   | 0.58          | 1.18            |
| PBCS 1+2 | 6    | 0.237 0.222 | 1306 819 124 1257 746 92    | 2249 2095  | 3.02     | 0.082418      | 1  | 0.91   | 0.83          | 1.01          | 0.84   | 0.68          | 1.02            |

Locus Alleles Chr Location Neighborhood  
rs7716600 C|A 5p12 44910762

| SUBSET   | Rank | MAF         | Geno Counts                 | Subjects   | score X2 | score p-value | df | het OR | het OR 95% CI | het OR 95% CI | hom OR | hom OR 95% CI | hom OR 95% CI_u |
|----------|------|-------------|-----------------------------|------------|----------|---------------|----|--------|---------------|---------------|--------|---------------|-----------------|
| STAGE1-3 | 3    | 0.221 0.241 | 6270 3545 506 5441 3395 564 | 10321 9400 | 21.09    | 4.37E-06      | 1  | 1.12   | 1.07          | 1.17          | 1.25   | 1.13          | 1.37            |
| NHS      | 7    | 0.215 0.249 | 693 402 44 652 415 78       | 1139 1145  | 7.27     | 0.0070119     | 1  | 1.21   | 1.05          | 1.39          | 1.46   | 1.11          | 1.93            |
| STAGE1-2 | 1    | 0.216 0.243 | 3227 1823 226 3147 1934 354 | 5276 5435  | 21.13    | 4.28E-06      | 1  | 1.16   | 1.09          | 1.24          | 1.35   | 1.19          | 1.53            |
| STAGE2   | 4    | 0.216 0.241 | 2534 1421 182 2495 1519 276 | 4137 4290  | 14.24    | 1.61E-04      | 1  | 1.15   | 1.07          | 1.23          | 1.32   | 1.14          | 1.52            |
| CPSII    | 18   | 0.225 0.236 | 325 192 26 315 186 33       | 543 534    | 0.32     | 0.5741513     | 1  | 1.06   | 0.87          | 1.30          | 1.12   | 0.75          | 1.68            |
| PBCS1    | 1    | 0.217 0.263 | 308 173 23 362 256 47       | 504 665    | 5.43     | 0.0197502     | 1  | 1.26   | 1.04          | 1.54          | 1.60   | 1.08          | 2.37            |
| PLCO     | 16   | 0.223 0.238 | 577 359 37 546 353 49       | 973 948    | 1.01     | 0.314706      | 1  | 1.08   | 0.93          | 1.27          | 1.17   | 0.86          | 1.60            |
| WHI      | 4    | 0.212 0.239 | 1499 797 111 1412 818 163   | 2407 2393  | 10.04    | 0.0015331     | 1  | 1.17   | 1.06          | 1.28          | 1.36   | 1.12          | 1.64            |
| STAGE3   | 5    | 0.226 0.237 | 3043 1724 280 2293 1464 209 | 5047 3966  | 3.26     | 0.0710771     | 1  | 1.07   | 0.99          | 1.14          | 1.14   | 0.99          | 1.31            |
| NHS2     | 15   | 0.229 0.236 | 676 383 66 324 211 27       | 1125 562   | 0.19     | 0.6639269     | 1  | 1.04   | 0.88          | 1.23          | 1.08   | 0.77          | 1.51            |
| NOR      | 20   | 0.246 0.241 | 284 178 33 293 191 28       | 495 512    | 0.11     | 0.7393387     | 1  | 0.97   | 0.79          | 1.19          | 0.93   | 0.62          | 1.40            |
| PBCS2    | 10   | 0.223 0.231 | 1070 586 98 847 518 74      | 1754 1439  | 0.84     | 0.3588107     | 1  | 1.06   | 0.94          | 1.19          | 1.12   | 0.88          | 1.41            |
| USRT     | 3    | 0.216 0.253 | 604 350 39 430 293 49       | 993 772    | 7.59     | 0.0058542     | 1  | 1.25   | 1.07          | 1.47          | 1.57   | 1.14          | 2.16            |
| WHS      | 24   | 0.232 0.230 | 409 227 44 399 251 31       | 680 681    | 0.01     | 0.9121223     | 1  | 0.99   | 0.83          | 1.18          | 0.98   | 0.69          | 1.40            |
| PBCS 1+2 | 3    | 0.221 0.241 | 1378 757 121 1210 771 122   | 2256 2103  | 4.56     | 0.0327753     | 1  | 1.11   | 1.01          | 1.23          | 1.24   | 1.02          | 1.52            |

Locus Alleles Chr Location Neighborhood  
rs4415084 C|T 5p12 44698272

| SUBSET   | Rank | MAF         | Geno Counts                   | Subjects   | score X2 | score p-value | df | het OR | het OR 95% CI | het OR 95% CI | hom OR | hom OR 95% CI | hom OR 95% CI_u |
|----------|------|-------------|-------------------------------|------------|----------|---------------|----|--------|---------------|---------------|--------|---------------|-----------------|
| STAGE1-3 | 4    | 0.406 0.429 | 3665 4889 1739 3084 4520 1763 | 10293 9367 | 20.00    | 7.74E-06      | 1  | 1.10   | 1.05          | 1.14          | 1.20   | 1.11          | 1.30            |
| NHS      | 5    | 0.392 0.435 | 429 513 186 350 583 203       | 1128 1136  | 8.48     | 0.0035956     | 1  | 1.19   | 1.06          | 1.34          | 1.42   | 1.12          | 1.81            |
| STAGE1-2 | 15   | 0.402 0.427 | 1895 2517 858 1797 2627 1006  | 5270 5430  | 12.61    | 0.0003835     | 1  | 1.10   | 1.05          | 1.17          | 1.22   | 1.09          | 1.36            |
| STAGE2   | 17   | 0.404 0.425 | 1466 2004 672 1447 2044 803   | 4142 4294  | 6.20     | 0.0127508     | 1  | 1.08   | 1.02          | 1.15          | 1.17   | 1.03          | 1.32            |

|          |    |             |                             |           |       |           |   |      |      |      |      |      |      |
|----------|----|-------------|-----------------------------|-----------|-------|-----------|---|------|------|------|------|------|------|
| CPSII    | 8  | 0.427 0.399 | 178 265 99 193 257 85       | 542 535   | 1.67  | 0.1956718 | 1 | 0.89 | 0.75 | 1.06 | 0.80 | 0.56 | 1.13 |
| PBCS1    | 2  | 0.410 0.460 | 174 249 83 193 337 139      | 506 669   | 5.41  | 0.0200439 | 1 | 1.22 | 1.03 | 1.45 | 1.50 | 1.06 | 2.10 |
| PLCO     | 19 | 0.408 0.422 | 339 475 160 321 454 173     | 974 948   | 0.30  | 0.5862473 | 1 | 1.04 | 0.91 | 1.18 | 1.07 | 0.83 | 1.39 |
| WHI      | 16 | 0.400 0.420 | 866 1158 385 827 1120 446   | 2409 2393 | 3.96  | 0.0466445 | 1 | 1.09 | 1.00 | 1.18 | 1.18 | 1.00 | 1.39 |
| STAGE3   | 2  | 0.412 0.433 | 1770 2375 882 1289 1898 760 | 5027 3947 | 8.29  | 0.0039758 | 1 | 1.09 | 1.03 | 1.16 | 1.19 | 1.06 | 1.34 |
| NHS2     | 5  | 0.402 0.436 | 413 517 193 178 270 107     | 1123 555  | 3.45  | 0.063066  | 1 | 1.15 | 0.99 | 1.32 | 1.31 | 0.99 | 1.75 |
| NOR      | 8  | 0.438 0.413 | 156 242 95 177 248 88       | 493 513   | 1.35  | 0.2451895 | 1 | 0.90 | 0.75 | 1.08 | 0.81 | 0.57 | 1.16 |
| PBCS2    | 7  | 0.424 0.435 | 593 833 328 457 711 271     | 1754 1439 | 1.05  | 0.3056504 | 1 | 1.05 | 0.95 | 1.16 | 1.11 | 0.91 | 1.35 |
| USRT     | 2  | 0.388 0.445 | 374 467 151 252 358 166     | 992 776   | 11.23 | 0.0008053 | 1 | 1.26 | 1.10 | 1.44 | 1.58 | 1.21 | 2.07 |
| WHS      | 11 | 0.411 0.427 | 234 316 115 225 311 128     | 665 664   | 0.73  | 0.3936072 | 1 | 1.07 | 0.92 | 1.24 | 1.14 | 0.84 | 1.55 |
| PBCS 1+2 | 5  | 0.421 0.443 | 767 1079 410 648 1043 407   | 2256 2098 | 4.15  | 0.0415184 | 1 | 1.09 | 1.00 | 1.19 | 1.19 | 1.01 | 1.42 |

| Locus      | Alleles | Chr         | Location                    | Neighborhood   |          |               |    |        |               |               |        |               |                 |                 |
|------------|---------|-------------|-----------------------------|----------------|----------|---------------|----|--------|---------------|---------------|--------|---------------|-----------------|-----------------|
| rs17570439 | T C     | 1p34.2      |                             | 40096797 TRIT1 |          |               |    |        |               |               |        |               |                 |                 |
| SUBSET     | Rank    | MAF         | Geno Counts                 | Subjects       | score X2 | score p-value | df | het OR | het OR 95% CI | het OR 95% CI | hom OR | hom OR 95% CI | hom OR 95% CI_u | hom OR 95% CI_u |
| STAGE1-3   | 5       | 0.209 0.226 | 6425 3413 446 5639 3268 487 | 10284 9394     | 16.18    | 5.77E-05      | 1  | 1.10   | 1.05          | 1.16          | 1.22   | 1.11          | 1.34            |                 |
| NHS        | 3       | 0.204 0.244 | 719 381 42 654 424 67       | 1142 1145      | 11.80    | 0.0005933     | 1  | 1.28   | 1.11          | 1.48          | 1.64   | 1.24          | 2.18            |                 |
| STAGE1-2   | 11      | 0.208 0.229 | 3286 1798 201 3238 1908 291 | 5285 5437      | 14.25    | 1.60E-04      | 1  | 1.13   | 1.06          | 1.21          | 1.29   | 1.13          | 1.47            |                 |
| STAGE2     | 19      | 0.209 0.225 | 2567 1417 159 2584 1484 224 | 4143 4292      | 6.04     | 0.0139776     | 1  | 1.10   | 1.02          | 1.18          | 1.20   | 1.04          | 1.40            |                 |
| CPSII      | 9       | 0.196 0.218 | 343 187 13 329 179 27       | 543 535        | 1.47     | 0.2247015     | 1  | 1.14   | 0.92          | 1.41          | 1.30   | 0.85          | 2.00            |                 |
| PBCS1      | 19      | 0.210 0.222 | 310 179 17 406 228 34       | 506 668        | 0.20     | 0.6582249     | 1  | 1.05   | 0.85          | 1.28          | 1.10   | 0.73          | 1.65            |                 |
| PLCO       | 14      | 0.220 0.235 | 599 323 53 552 346 50       | 975 948        | 1.26     | 0.2621398     | 1  | 1.09   | 0.94          | 1.27          | 1.19   | 0.88          | 1.61            |                 |
| WHI        | 8       | 0.206 0.226 | 1501 825 83 1438 829 125    | 2409 2392      | 5.88     | 0.015278      | 1  | 1.13   | 1.02          | 1.25          | 1.28   | 1.05          | 1.55            |                 |
| STAGE3     | 6       | 0.211 0.221 | 3139 1616 245 2400 1360 196 | 5000 3956      | 2.71     | 0.0994748     | 1  | 1.06   | 0.99          | 1.14          | 1.13   | 0.98          | 1.30            |                 |
| NHS2       | 8       | 0.208 0.226 | 694 332 60 329 192 28       | 1086 549       | 1.37     | 0.2423672     | 1  | 1.11   | 0.93          | 1.31          | 1.23   | 0.87          | 1.73            |                 |
| NOR        | 6       | 0.210 0.233 | 310 164 22 301 185 27       | 496 513        | 1.65     | 0.19877       | 1  | 1.15   | 0.93          | 1.42          | 1.32   | 0.86          | 2.02            |                 |
| PBCS2      | 14      | 0.208 0.216 | 1111 557 86 891 478 72      | 1754 1441      | 0.49     | 0.48512       | 1  | 1.04   | 0.93          | 1.18          | 1.09   | 0.86          | 1.38            |                 |
| USRT       | 16      | 0.218 0.221 | 607 344 45 476 258 43       | 996 777        | 0.16     | 0.6850219     | 1  | 1.03   | 0.88          | 1.21          | 1.07   | 0.78          | 1.47            |                 |
| WHS        | 15      | 0.212 0.221 | 417 219 32 403 247 26       | 668 676        | 0.35     | 0.555449      | 1  | 1.06   | 0.88          | 1.27          | 1.12   | 0.77          | 1.62            |                 |
| PBCS 1+2   | 12      | 0.208 0.218 | 1421 735 103 1298 706 106   | 2259 2110      | 0.98     | 0.3212604     | 1  | 1.05   | 0.95          | 1.17          | 1.11   | 0.90          | 1.36            |                 |

| Locus     | Alleles | Chr         | Location                    | Neighborhood         |          |               |    |        |               |               |        |               |                 |                 |
|-----------|---------|-------------|-----------------------------|----------------------|----------|---------------|----|--------|---------------|---------------|--------|---------------|-----------------|-----------------|
| rs3134615 | G T     | 1p34.2      |                             | 40134653 TRIT1,MYCL1 |          |               |    |        |               |               |        |               |                 |                 |
| SUBSET    | Rank    | MAF         | Geno Counts                 | Subjects             | score X2 | score p-value | df | het OR | het OR 95% CI | het OR 95% CI | hom OR | hom OR 95% CI | hom OR 95% CI_u | hom OR 95% CI_u |
| STAGE1-3  | 6       | 0.228 0.246 | 6153 3643 540 5335 3514 552 | 10336 9401           | 15.87    | 6.78E-05      | 1  | 1.10   | 1.05          | 1.15          | 1.21   | 1.10          | 1.33            |                 |
| NHS       | 1       | 0.220 0.263 | 690 402 50 617 454 74       | 1142 1145            | 13.22    | 2.77E-04      | 1  | 1.29   | 1.13          | 1.49          | 1.67   | 1.27          | 2.21            |                 |
| STAGE1-2  | 9       | 0.228 0.250 | 3134 1895 256 3048 2068 324 | 5285 5440            | 14.78    | 1.21E-04      | 1  | 1.13   | 1.06          | 1.21          | 1.28   | 1.13          | 1.46            |                 |
| STAGE2    | 20      | 0.230 0.246 | 2444 1493 206 2431 1614 250 | 4143 4295            | 5.93     | 0.014906      | 1  | 1.09   | 1.02          | 1.17          | 1.20   | 1.04          | 1.38            |                 |
| CPSII     | 11      | 0.215 0.236 | 326 200 17 313 192 30       | 543 535              | 1.34     | 0.2471949     | 1  | 1.13   | 0.92          | 1.39          | 1.28   | 0.84          | 1.94            |                 |
| PBCS1     | 17      | 0.226 0.238 | 299 185 22 387 245 37       | 506 669              | 0.22     | 0.636199      | 1  | 1.05   | 0.86          | 1.28          | 1.10   | 0.74          | 1.64            |                 |
| PLCO      | 9       | 0.236 0.258 | 578 334 63 516 375 57       | 975 948              | 2.13     | 0.1446897     | 1  | 1.12   | 0.96          | 1.29          | 1.25   | 0.93          | 1.67            |                 |
| WHI       | 13      | 0.229 0.248 | 1421 875 113 1349 904 141   | 2409 2394            | 5.08     | 0.0241355     | 1  | 1.12   | 1.01          | 1.23          | 1.24   | 1.03          | 1.51            |                 |
| STAGE3    | 7       | 0.229 0.240 | 3019 1748 284 2287 1449 229 | 5051 3965            | 2.48     | 0.1154563     | 1  | 1.06   | 0.99          | 1.13          | 1.12   | 0.97          | 1.29            |                 |
| NHS2      | 17      | 0.228 0.233 | 687 372 72 328 198 31       | 1131 557             | 0.12     | 0.7307379     | 1  | 1.03   | 0.87          | 1.22          | 1.06   | 0.76          | 1.48            |                 |
| NOR       | 10      | 0.232 0.253 | 292 179 26 284 200 30       | 497 514              | 1.23     | 0.2665757     | 1  | 1.12   | 0.91          | 1.38          | 1.26   | 0.84          | 1.91            |                 |
| PBCS2     | 19      | 0.226 0.231 | 1063 591 102 854 504 81     | 1756 1439            | 0.14     | 0.707232      | 1  | 1.02   | 0.91          | 1.15          | 1.05   | 0.83          | 1.32            |                 |
| USRT      | 15      | 0.240 0.246 | 567 373 51 445 276 52       | 991 773              | 0.24     | 0.6237828     | 1  | 1.04   | 0.89          | 1.22          | 1.08   | 0.79          | 1.48            |                 |
| WHS       | 2       | 0.221 0.250 | 410 233 33 376 271 35       | 676 682              | 3.21     | 0.0730353     | 1  | 1.18   | 0.98          | 1.41          | 1.39   | 0.97          | 2.00            |                 |
| PBCS 1+2  | 16      | 0.226 0.233 | 1362 776 124 1241 746 117   | 2262 2104            | 0.44     | 0.5072521     | 1  | 1.03   | 0.94          | 1.14          | 1.07   | 0.88          | 1.31            |                 |

| Locus      | Alleles | Chr         | Location                   | Neighborhood |          |               |    |        |               |               |        |               |                 |                 |
|------------|---------|-------------|----------------------------|--------------|----------|---------------|----|--------|---------------|---------------|--------|---------------|-----------------|-----------------|
| rs10850145 | C T     | 12q24.13    |                            | 112428512    |          |               |    |        |               |               |        |               |                 |                 |
| SUBSET     | Rank    | MAF         | Geno Counts                | Subjects     | score X2 | score p-value | df | het OR | het OR 95% CI | het OR 95% CI | hom OR | hom OR 95% CI | hom OR 95% CI_u | hom OR 95% CI_u |
| STAGE1-3   | 7       | 0.095 0.106 | 8474 1786 86 7536 1776 110 | 10346 9422   | 14.37    | 1.50E-04      | 1  | 1.14   | 1.06          | 1.22          | 1.29   | 1.13          | 1.48            |                 |

|          |    |             |                          |           |       |           |   |      |      |      |      |      |      |
|----------|----|-------------|--------------------------|-----------|-------|-----------|---|------|------|------|------|------|------|
| NHS      | 6  | 0.086 0.110 | 951 186 5 912 215 18     | 1142 1145 | 7.67  | 0.005608  | 1 | 1.32 | 1.08 | 1.61 | 1.75 | 1.18 | 2.60 |
| STAGE1-2 | 7  | 0.089 0.107 | 4388 850 47 4340 1031 67 | 5285 5438 | 16.61 | 4.58E-05  | 1 | 1.21 | 1.10 | 1.32 | 1.46 | 1.22 | 1.75 |
| STAGE2   | 9  | 0.090 0.106 | 3437 664 42 3428 816 49  | 4143 4293 | 9.91  | 0.0016445 | 1 | 1.18 | 1.06 | 1.31 | 1.39 | 1.13 | 1.70 |
| CPSII    | 15 | 0.099 0.107 | 444 90 9 426 103 6       | 543 535   | 0.40  | 0.5261969 | 1 | 1.09 | 0.83 | 1.44 | 1.20 | 0.69 | 2.08 |
| PBCS1    | 10 | 0.094 0.113 | 417 83 6 523 141 5       | 506 669   | 1.78  | 0.182647  | 1 | 1.21 | 0.91 | 1.60 | 1.46 | 0.84 | 2.54 |
| PLCO     | 8  | 0.077 0.094 | 832 135 8 775 167 6      | 975 948   | 2.58  | 0.1085054 | 1 | 1.21 | 0.96 | 1.52 | 1.46 | 0.92 | 2.30 |
| WHI      | 6  | 0.094 0.111 | 1982 403 24 1898 459 35  | 2409 2392 | 7.04  | 0.0079531 | 1 | 1.20 | 1.05 | 1.37 | 1.43 | 1.10 | 1.87 |
| STAGE3   | 9  | 0.100 0.104 | 4086 937 39 3198 745 43  | 5062 3986 | 1.29  | 0.2560992 | 1 | 1.06 | 0.96 | 1.17 | 1.12 | 0.92 | 1.36 |
| NHS2     | 20 | 0.103 0.105 | 905 207 12 456 92 13     | 1124 561  | 0.05  | 0.8275237 | 1 | 1.03 | 0.82 | 1.29 | 1.05 | 0.67 | 1.67 |
| NOR      | 14 | 0.081 0.090 | 414 80 0 426 82 5        | 494 513   | 0.45  | 0.5013195 | 1 | 1.12 | 0.81 | 1.54 | 1.25 | 0.66 | 2.36 |
| PBCS2    | 15 | 0.104 0.108 | 1412 338 15 1152 282 16  | 1765 1450 | 0.40  | 0.5292011 | 1 | 1.05 | 0.90 | 1.24 | 1.11 | 0.80 | 1.53 |
| USRT     | 23 | 0.105 0.106 | 799 184 12 622 146 9     | 995 777   | 0.00  | 0.9715141 | 1 | 1.00 | 0.81 | 1.25 | 1.01 | 0.65 | 1.56 |
| WHS      | 9  | 0.094 0.104 | 556 128 0 542 143 0      | 684 685   | 1.00  | 0.3178945 | 1 | 1.15 | 0.88 | 1.50 | 1.31 | 0.77 | 2.24 |
| PBCS 1+2 | 9  | 0.102 0.110 | 1829 420 21 1673 423 21  | 2270 2117 | 1.73  | 0.1883632 | 1 | 1.10 | 0.96 | 1.26 | 1.20 | 0.91 | 1.59 |

Locus Alleles Chr Location Neighborhood  
rs2303659 G|A 11q24.3 129326474 PRDM10

| SUBSET   | Rank | MAF         | Geno Counts             | Subjects   | score X2 | score p-value | df | het OR | het OR 95% CI | het OR 95% CI | hom OR | hom OR 95% CI | hom OR 95% CI_u |
|----------|------|-------------|-------------------------|------------|----------|---------------|----|--------|---------------|---------------|--------|---------------|-----------------|
| STAGE1-3 | 8    | 0.035 0.028 | 9603 693 10 8879 500 14 | 10306 9393 | 12.73    | 0.00036       | 1  | 0.81   | 0.72          | 0.91          | 0.66   | 0.52          | 0.83            |
| NHS      | 13   | 0.034 0.024 | 1064 78 0 1089 56 0     | 1142 1145  | 3.94     | 0.0470387     | 1  | 0.70   | 0.49          | 1.00          | 0.49   | 0.24          | 0.99            |
| STAGE1-2 | 10   | 0.034 0.025 | 4927 356 2 5166 271 3   | 5285 5440  | 14.42    | 1.46E-04      | 1  | 0.73   | 0.62          | 0.86          | 0.54   | 0.39          | 0.74            |
| STAGE2   | 7    | 0.034 0.026 | 3863 278 2 4077 215 3   | 4143 4295  | 10.50    | 0.0011939     | 1  | 0.74   | 0.62          | 0.89          | 0.55   | 0.38          | 0.79            |
| CPSII    | 2    | 0.030 0.017 | 510 33 0 518 16 1       | 543 535    | 4.52     | 0.0335397     | 1  | 0.53   | 0.30          | 0.96          | 0.29   | 0.09          | 0.92            |
| PBCS1    | 5    | 0.033 0.022 | 473 33 0 640 29 0       | 506 669    | 3.23     | 0.0723462     | 1  | 0.62   | 0.37          | 1.05          | 0.39   | 0.14          | 1.10            |
| PLCO     | 10   | 0.036 0.028 | 906 68 1 895 52 1       | 975 948    | 2.09     | 0.1478121     | 1  | 0.76   | 0.53          | 1.10          | 0.58   | 0.28          | 1.21            |
| WHI      | 11   | 0.034 0.026 | 2245 163 1 2269 124 1   | 2409 2394  | 5.62     | 0.0177855     | 1  | 0.75   | 0.59          | 0.95          | 0.56   | 0.35          | 0.91            |
| STAGE3   | 8    | 0.035 0.032 | 4676 337 8 3714 229 11  | 5021 3954  | 1.40     | 0.2362169     | 1  | 0.91   | 0.77          | 1.07          | 0.82   | 0.59          | 1.14            |
| NHS2     | 3    | 0.039 0.025 | 1029 77 5 534 20 4      | 1111 558   | 3.91     | 0.0479425     | 1  | 0.66   | 0.44          | 1.00          | 0.44   | 0.19          | 1.00            |
| NOR      | 12   | 0.036 0.043 | 460 36 0 472 44 0       | 496 516    | 0.66     | 0.4174926     | 1  | 1.21   | 0.76          | 1.92          | 1.46   | 0.58          | 3.68            |
| PBCS2    | 17   | 0.032 0.030 | 1648 112 1 1358 83 2    | 1761 1443  | 0.18     | 0.6735738     | 1  | 0.94   | 0.71          | 1.25          | 0.88   | 0.50          | 1.56            |
| USRT     | 19   | 0.037 0.035 | 920 74 0 723 54 0       | 994 777    | 0.12     | 0.7345186     | 1  | 0.94   | 0.65          | 1.35          | 0.88   | 0.42          | 1.83            |
| WHS      | 17   | 0.032 0.029 | 619 38 2 627 28 5       | 659 660    | 0.19     | 0.6663294     | 1  | 0.91   | 0.60          | 1.38          | 0.83   | 0.36          | 1.91            |
| PBCS 1+2 | 11   | 0.032 0.027 | 2121 145 1 1997 112 2   | 2267 2111  | 1.53     | 0.2154451     | 1  | 0.85   | 0.67          | 1.10          | 0.73   | 0.44          | 1.20            |

Locus Alleles Chr Location Neighborhood  
rs2067980 A|G 5p12 45018074

| SUBSET   | Rank | MAF         | Geno Counts                 | Subjects   | score X2 | score p-value | df | het OR | het OR 95% CI | het OR 95% CI | hom OR | hom OR 95% CI | hom OR 95% CI_u |
|----------|------|-------------|-----------------------------|------------|----------|---------------|----|--------|---------------|---------------|--------|---------------|-----------------|
| STAGE1-3 | 9    | 0.159 0.173 | 7305 2730 274 6459 2624 308 | 10309 9391 | 12.55    | 0.0003956     | 1  | 1.10   | 1.04          | 1.16          | 1.21   | 1.09          | 1.35            |
| NHS      | 8    | 0.151 0.178 | 814 311 17 769 342 33       | 1142 1144  | 6.87     | 0.0087432     | 1  | 1.24   | 1.06          | 1.46          | 1.54   | 1.11          | 2.12            |
| STAGE1-2 | 6    | 0.150 0.173 | 3805 1375 105 3737 1522 180 | 5285 5439  | 18.00    | 2.21E-05      | 1  | 1.17   | 1.09          | 1.26          | 1.37   | 1.19          | 1.59            |
| STAGE2   | 6    | 0.150 0.172 | 2991 1064 88 2968 1180 147  | 4143 4295  | 11.68    | 0.0006311     | 1  | 1.15   | 1.06          | 1.25          | 1.33   | 1.13          | 1.57            |
| CPSII    | 20   | 0.159 0.164 | 383 147 13 377 140 18       | 543 535    | 0.03     | 0.8591097     | 1  | 1.02   | 0.81          | 1.28          | 1.04   | 0.66          | 1.65            |
| PBCS1    | 4    | 0.191 0.227 | 335 149 22 400 234 35       | 506 669    | 4.09     | 0.0431819     | 1  | 1.23   | 1.01          | 1.51          | 1.52   | 1.01          | 2.29            |
| PLCO     | 6    | 0.144 0.166 | 714 241 20 658 265 25       | 975 948    | 2.82     | 0.0928822     | 1  | 1.16   | 0.97          | 1.39          | 1.36   | 0.95          | 1.94            |
| WHI      | 9    | 0.143 0.161 | 1761 606 42 1700 616 78     | 2409 2394  | 5.86     | 0.0155274     | 1  | 1.15   | 1.03          | 1.28          | 1.32   | 1.05          | 1.64            |
| STAGE3   | 13   | 0.169 0.172 | 3500 1356 169 2722 1105 128 | 5025 3955  | 0.57     | 0.4497368     | 1  | 1.03   | 0.95          | 1.11          | 1.06   | 0.91          | 1.24            |
| NHS2     | 9    | 0.169 0.156 | 777 292 42 394 140 16       | 1111 550   | 0.83     | 0.3615564     | 1  | 0.91   | 0.76          | 1.11          | 0.84   | 0.57          | 1.23            |
| NOR      | 16   | 0.142 0.135 | 364 125 8 382 127 6         | 497 515    | 0.36     | 0.5511798     | 1  | 0.92   | 0.71          | 1.20          | 0.85   | 0.51          | 1.44            |
| PBCS2    | 22   | 0.190 0.192 | 1158 519 73 941 441 55      | 1750 1437  | 0.06     | 0.808242      | 1  | 1.02   | 0.90          | 1.15          | 1.03   | 0.80          | 1.32            |
| USRT     | 4    | 0.155 0.177 | 713 256 26 530 216 29       | 995 775    | 3.17     | 0.0752123     | 1  | 1.17   | 0.98          | 1.40          | 1.38   | 0.97          | 1.97            |
| WHS      | 10   | 0.152 0.166 | 488 164 20 475 181 22       | 672 678    | 0.97     | 0.3236031     | 1  | 1.11   | 0.90          | 1.36          | 1.23   | 0.82          | 1.84            |
| PBCS 1+2 | 10   | 0.190 0.203 | 1493 667 95 1341 672 90     | 2255 2103  | 1.66     | 0.1976639     | 1  | 1.07   | 0.96          | 1.19          | 1.15   | 0.93          | 1.42            |

Locus Alleles Chr Location Neighborhood  
rs10941679 A|G 5p12 44742255

| SUBSET   | Rank | MAF         | Geno Counts                 | Subjects  | score X2 | score p-value | df | het OR | het OR 95% CI | het OR 95% CI | hom OR | hom OR 95% I | hom OR 95% CI_u |
|----------|------|-------------|-----------------------------|-----------|----------|---------------|----|--------|---------------|---------------|--------|--------------|-----------------|
| STAGE1-3 | 10   | 0.259 0.280 | 3015 2105 370 2365 1859 351 | 5490 4575 | 10.10    | 0.0014842     | 1  | 1.11   | 1.04          | 1.18          | 1.23   | 1.08         | 1.39            |
| STAGE3   | 3    | 0.259 0.278 | 2759 1911 343 2048 1601 295 | 5013 3944 | 7.80     | 0.0052166     | 1  | 1.10   | 1.03          | 1.18          | 1.21   | 1.06         | 1.39            |
| NHS2     | 7    | 0.256 0.280 | 607 415 73 286 220 44       | 1095 550  | 2.12     | 0.1453449     | 1  | 1.13   | 0.96          | 1.33          | 1.27   | 0.92         | 1.76            |
| NOR      | 9    | 0.303 0.282 | 239 213 44 265 210 40       | 496 515   | 1.27     | 0.2601558     | 1  | 0.89   | 0.74          | 1.09          | 0.80   | 0.54         | 1.18            |
| PBCS2    | 3    | 0.259 0.276 | 969 667 121 737 605 94      | 1757 1436 | 2.90     | 0.0887689     | 1  | 1.10   | 0.99          | 1.24          | 1.22   | 0.97         | 1.53            |
| USRT     | 1    | 0.236 0.290 | 575 373 49 395 307 71       | 997 773   | 13.54    | 2.34E-04      | 1  | 1.33   | 1.14          | 1.55          | 1.77   | 1.30         | 2.40            |
| WHS      | 20   | 0.266 0.262 | 369 243 56 365 259 46       | 668 670   | 0.05     | 0.8274126     | 1  | 0.98   | 0.83          | 1.16          | 0.96   | 0.69         | 1.35            |
| PBCS 1+2 | 2    | 0.259 0.281 | 1225 861 148 1054 863 150   | 2234 2067 | 5.35     | 0.0207502     | 1  | 1.12   | 1.02          | 1.24          | 1.26   | 1.04         | 1.53            |

Locus Alleles Chr Location Neighborhood  
rs1274466 T|C 10p11.21 34510210 PARD3

| SUBSET   | Rank | MAF         | Geno Counts                   | Subjects   | score X2 | score p-value | df | het OR | het OR 95% CI | het OR 95% CI | hom OR | hom OR 95% I | hom OR 95% CI_u |
|----------|------|-------------|-------------------------------|------------|----------|---------------|----|--------|---------------|---------------|--------|--------------|-----------------|
| STAGE1-3 | 11   | 0.448 0.433 | 3162 5069 2091 3036 4591 1771 | 10322 9398 | 9.26     | 0.0023405     | 1  | 0.94   | 0.90          | 0.98          | 0.88   | 0.82         | 0.96            |
| NHS      | 12   | 0.470 0.439 | 312 586 244 357 569 218       | 1142 1144  | 4.22     | 0.0400373     | 1  | 0.88   | 0.79          | 0.99          | 0.78   | 0.62         | 0.99            |
| STAGE1-2 | 13   | 0.454 0.430 | 1574 2619 1092 1768 2664 1006 | 5285 5438  | 13.21    | 2.79E-04      | 1  | 0.90   | 0.86          | 0.95          | 0.82   | 0.73         | 0.91            |
| STAGE2   | 11   | 0.450 0.427 | 1262 2033 848 1411 2095 788   | 4143 4294  | 9.19     | 0.002437      | 1  | 0.91   | 0.86          | 0.97          | 0.83   | 0.73         | 0.94            |
| CPSII    | 6    | 0.471 0.436 | 152 271 120 172 259 104       | 543 535    | 2.63     | 0.1051026     | 1  | 0.87   | 0.73          | 1.03          | 0.75   | 0.54         | 1.06            |
| PBCS1    | 8    | 0.483 0.446 | 138 247 121 200 340 128       | 506 668    | 2.28     | 0.1306366     | 1  | 0.88   | 0.74          | 1.04          | 0.77   | 0.55         | 1.08            |
| PLCO     | 4    | 0.449 0.419 | 298 478 199 319 464 165       | 975 948    | 4.05     | 0.0440809     | 1  | 0.88   | 0.77          | 1.00          | 0.77   | 0.59         | 1.00            |
| WHI      | 18   | 0.443 0.424 | 755 1175 479 803 1153 438     | 2409 2394  | 3.46     | 0.0626881     | 1  | 0.93   | 0.86          | 1.00          | 0.86   | 0.73         | 1.01            |
| STAGE3   | 16   | 0.442 0.437 | 1588 2454 1000 1269 1929 767  | 5042 3965  | 0.30     | 0.5847041     | 1  | 0.98   | 0.93          | 1.04          | 0.97   | 0.86         | 1.09            |
| NHS2     | 21   | 0.440 0.436 | 363 535 227 175 278 104       | 1125 557   | 0.03     | 0.8599302     | 1  | 0.99   | 0.86          | 1.14          | 0.97   | 0.73         | 1.30            |
| NOR      | 18   | 0.391 0.401 | 184 235 76 188 240 86         | 495 514    | 0.22     | 0.6390995     | 1  | 1.04   | 0.87          | 1.25          | 1.09   | 0.76         | 1.55            |
| PBCS2    | 4    | 0.457 0.441 | 518 863 368 456 695 287       | 1749 1438  | 1.78     | 0.1826356     | 1  | 0.93   | 0.85          | 1.03          | 0.87   | 0.72         | 1.07            |
| USRT     | 11   | 0.454 0.444 | 295 489 205 243 378 156       | 989 777    | 0.63     | 0.426563      | 1  | 0.95   | 0.83          | 1.08          | 0.90   | 0.69         | 1.17            |
| WHS      | 4    | 0.424 0.446 | 228 332 124 207 338 134       | 684 679    | 1.37     | 0.2422335     | 1  | 1.09   | 0.94          | 1.27          | 1.20   | 0.88         | 1.62            |
| PBCS 1+2 | 4    | 0.463 0.442 | 656 1106 488 655 1033 413     | 2250 2101  | 4.28     | 0.0386343     | 1  | 0.91   | 0.84          | 1.00          | 0.84   | 0.71         | 0.99            |

Locus Alleles Chr Location Neighborhood  
rs9491859 C|A 6q22.33 128106056 G6orf190

| SUBSET   | Rank | MAF         | Geno Counts                   | Subjects   | score X2 | score p-value | df | het OR | het OR 95% CI | het OR 95% CI | hom OR | hom OR 95% I | hom OR 95% CI_u |
|----------|------|-------------|-------------------------------|------------|----------|---------------|----|--------|---------------|---------------|--------|--------------|-----------------|
| STAGE1-3 | 12   | 0.355 0.370 | 4295 4686 1313 3761 4282 1328 | 10294 9371 | 9.18     | 0.0024515     | 1  | 1.07   | 1.02          | 1.11          | 1.14   | 1.05         | 1.23            |
| NHS      | 14   | 0.356 0.381 | 459 552 130 447 523 175       | 1141 1145  | 2.91     | 0.0878516     | 1  | 1.11   | 0.98          | 1.26          | 1.24   | 0.97         | 1.58            |
| STAGE1-2 | 8    | 0.349 0.375 | 2226 2433 625 2178 2443 817   | 5284 5438  | 15.66    | 7.59E-05      | 1  | 1.12   | 1.06          | 1.18          | 1.25   | 1.12         | 1.40            |
| STAGE2   | 5    | 0.346 0.373 | 1767 1881 495 1731 1920 642   | 4143 4293  | 12.84    | 0.0003385     | 1  | 1.12   | 1.05          | 1.19          | 1.26   | 1.11         | 1.43            |
| CPSII    | 17   | 0.350 0.339 | 220 266 57 238 231 66         | 543 535    | 0.32     | 0.5728865     | 1  | 0.95   | 0.79          | 1.14          | 0.90   | 0.63         | 1.29            |
| PBCS1    | 22   | 0.345 0.356 | 216 231 59 287 287 94         | 506 668    | 0.08     | 0.7782246     | 1  | 1.03   | 0.86          | 1.22          | 1.05   | 0.75         | 1.48            |
| PLCO     | 2    | 0.333 0.374 | 437 427 111 378 430 140       | 975 948    | 6.54     | 0.0105207     | 1  | 1.19   | 1.04          | 1.36          | 1.41   | 1.08         | 1.84            |
| WHI      | 3    | 0.351 0.383 | 1018 1093 298 933 1089 371    | 2409 2393  | 10.10    | 0.0014858     | 1  | 1.14   | 1.05          | 1.24          | 1.31   | 1.11         | 1.54            |
| STAGE3   | 22   | 0.362 0.364 | 2070 2257 688 1584 1840 511   | 5015 3935  | 0.02     | 0.8889519     | 1  | 1.00   | 0.94          | 1.07          | 1.01   | 0.89         | 1.14            |
| NHS2     | 24   | 0.368 0.367 | 459 501 163 226 249 79        | 1123 554   | 0.00     | 0.9821966     | 1  | 1.00   | 0.86          | 1.16          | 1.00   | 0.74         | 1.34            |
| NOR      | 24   | 0.372 0.371 | 200 212 75 200 232 70         | 487 502    | 0.00     | 0.9692459     | 1  | 1.00   | 0.83          | 1.19          | 0.99   | 0.69         | 1.42            |
| PBCS2    | 24   | 0.349 0.349 | 744 779 218 599 660 169       | 1741 1428  | 0.01     | 0.9371275     | 1  | 1.00   | 0.90          | 1.11          | 0.99   | 0.81         | 1.22            |
| USRT     | 12   | 0.374 0.366 | 391 459 141 311 366 102       | 991 779    | 0.44     | 0.5061617     | 1  | 0.95   | 0.83          | 1.10          | 0.91   | 0.69         | 1.20            |
| WHS      | 5    | 0.363 0.383 | 276 306 91 248 333 91         | 673 672    | 1.27     | 0.2606075     | 1  | 1.09   | 0.93          | 1.28          | 1.20   | 0.87         | 1.64            |
| PBCS 1+2 | 21   | 0.348 0.351 | 959 1006 277 885 946 263      | 2242 2094  | 0.09     | 0.7588788     | 1  | 1.01   | 0.93          | 1.11          | 1.03   | 0.86         | 1.23            |

Locus Alleles Chr Location Neighborhood  
rs724244 C|T 3p24.1 27217157 NEK10

| SUBSET   | Rank | MAF         | Geno Counts                 | Subjects  | score X2 | score p-value | df | het OR | het OR 95% CI | het OR 95% CI | hom OR | hom OR 95% I | hom OR 95% CI_u |
|----------|------|-------------|-----------------------------|-----------|----------|---------------|----|--------|---------------|---------------|--------|--------------|-----------------|
| STAGE1-3 | 13   | 0.261 0.275 | 5011 3522 635 4351 3283 626 | 9168 8260 | 8.55     | 0.0034643     | 1  | 1.07   | 1.02          | 1.13          | 1.15   | 1.05         | 1.27            |
| STAGE1-2 | 5    | 0.252 0.281 | 2304 1588 250 2220 1730 341 | 4142 4291 | 19.41    | 1.06E-05      | 1  | 1.17   | 1.09          | 1.25          | 1.36   | 1.19         | 1.57            |

|          |    |             |                             |           |       |           |   |      |      |      |      |      |      |
|----------|----|-------------|-----------------------------|-----------|-------|-----------|---|------|------|------|------|------|------|
| STAGE2   | 1  | 0.252 0.281 | 2304 1588 250 2220 1730 341 | 4142 4291 | 19.25 | 1.15E-05  | 1 | 1.17 | 1.09 | 1.25 | 1.36 | 1.19 | 1.57 |
| CPSII    | 7  | 0.247 0.273 | 309 198 35 287 202 45       | 542 534   | 1.86  | 0.1728142 | 1 | 1.14 | 0.94 | 1.38 | 1.30 | 0.89 | 1.91 |
| PBCS1    | 12 | 0.246 0.265 | 293 177 36 368 245 54       | 506 667   | 1.17  | 0.2804155 | 1 | 1.11 | 0.92 | 1.33 | 1.23 | 0.85 | 1.78 |
| PLCO     | 1  | 0.230 0.291 | 569 364 42 481 381 85       | 975 947   | 18.94 | 1.35E-05  | 1 | 1.39 | 1.20 | 1.61 | 1.93 | 1.43 | 2.60 |
| WHI      | 12 | 0.263 0.283 | 1302 949 158 1217 998 179   | 2409 2394 | 5.13  | 0.0234819 | 1 | 1.11 | 1.01 | 1.22 | 1.23 | 1.03 | 1.48 |
| STAGE3   | 21 | 0.269 0.267 | 2707 1938 385 2132 1554 285 | 5030 3971 | 0.03  | 0.8693836 | 1 | 0.99 | 0.93 | 1.06 | 0.99 | 0.87 | 1.13 |
| NHS2     | 10 | 0.269 0.281 | 611 397 100 293 218 48      | 1108 559  | 0.45  | 0.5039181 | 1 | 1.05 | 0.90 | 1.23 | 1.11 | 0.81 | 1.52 |
| NOR      | 13 | 0.248 0.264 | 276 192 27 278 204 34       | 495 516   | 0.59  | 0.4405073 | 1 | 1.08 | 0.88 | 1.33 | 1.17 | 0.78 | 1.76 |
| PBCS2    | 6  | 0.273 0.261 | 926 696 131 778 567 92      | 1753 1437 | 1.14  | 0.2857261 | 1 | 0.94 | 0.84 | 1.05 | 0.88 | 0.71 | 1.11 |
| USRT     | 17 | 0.273 0.267 | 524 397 73 418 302 56       | 994 776   | 0.15  | 0.6967169 | 1 | 0.97 | 0.83 | 1.13 | 0.94 | 0.70 | 1.27 |
| WHS      | 19 | 0.268 0.273 | 370 256 54 365 263 55       | 680 683   | 0.09  | 0.7645311 | 1 | 1.03 | 0.87 | 1.21 | 1.05 | 0.75 | 1.47 |
| PBCS 1+2 | 19 | 0.267 0.262 | 1219 869 167 1145 811 146   | 2255 2102 | 0.12  | 0.7275676 | 1 | 0.98 | 0.89 | 1.08 | 0.97 | 0.80 | 1.17 |

Locus Alleles Chr Location Neighborhood  
rs12622050 G|A 2q11.2 100945886 NPAS2

| SUBSET   | Rank | MAF         | Geno Counts                 | Subjects   | score X2 | score p-value | df | het OR | het OR 95% CI | het OR 95% CI | hom OR | hom OR 95% CI | hom OR 95% CI_u |
|----------|------|-------------|-----------------------------|------------|----------|---------------|----|--------|---------------|---------------|--------|---------------|-----------------|
| STAGE1-3 | 14   | 0.223 0.212 | 6195 3596 493 5841 3084 449 | 10284 9374 | 7.45     | 0.0063435     | 1  | 0.93   | 0.89          | 0.98          | 0.87   | 0.79          | 0.96            |
| NHS      | 9    | 0.220 0.189 | 695 392 55 754 349 42       | 1142 1145  | 6.33     | 0.0118981     | 1  | 0.83   | 0.72          | 0.96          | 0.69   | 0.52          | 0.92            |
| STAGE1-2 | 14   | 0.220 0.201 | 3183 1875 227 3482 1721 235 | 5285 5438  | 12.71    | 0.0003635     | 1  | 0.89   | 0.83          | 0.95          | 0.79   | 0.69          | 0.90            |
| STAGE2   | 14   | 0.220 0.205 | 2488 1483 172 2728 1372 193 | 4143 4293  | 7.53     | 0.0060846     | 1  | 0.90   | 0.84          | 0.97          | 0.81   | 0.70          | 0.94            |
| CPSII    | 13   | 0.217 0.205 | 323 203 16 341 165 27       | 542 533    | 0.67     | 0.4117414     | 1  | 0.91   | 0.74          | 1.13          | 0.84   | 0.55          | 1.28            |
| PBCS1    | 20   | 0.244 0.239 | 284 197 25 391 235 42       | 506 668    | 0.18     | 0.6738738     | 1  | 0.96   | 0.79          | 1.17          | 0.92   | 0.62          | 1.36            |
| PLCO     | 3    | 0.229 0.199 | 577 350 48 606 307 35       | 975 948    | 4.98     | 0.0256001     | 1  | 0.84   | 0.71          | 0.98          | 0.70   | 0.51          | 0.96            |
| WHI      | 14   | 0.213 0.196 | 1476 838 95 1557 734 102    | 2409 2393  | 4.67     | 0.0306956     | 1  | 0.90   | 0.81          | 0.99          | 0.80   | 0.66          | 0.98            |
| STAGE3   | 23   | 0.225 0.227 | 3013 1723 266 2360 1365 213 | 5002 3938  | 0.01     | 0.928739      | 1  | 1.00   | 0.93          | 1.07          | 0.99   | 0.86          | 1.14            |
| NHS2     | 18   | 0.200 0.204 | 712 332 53 344 181 21       | 1097 546   | 0.11     | 0.7426708     | 1  | 1.03   | 0.86          | 1.23          | 1.06   | 0.74          | 1.52            |
| NOR      | 23   | 0.221 0.219 | 297 179 20 314 175 25       | 496 514    | 0.02     | 0.8844886     | 1  | 0.98   | 0.79          | 1.22          | 0.97   | 0.63          | 1.49            |
| PBCS2    | 20   | 0.252 0.258 | 980 644 117 793 540 99      | 1741 1432  | 0.14     | 0.7095465     | 1  | 1.02   | 0.91          | 1.14          | 1.04   | 0.83          | 1.31            |
| USRT     | 24   | 0.206 0.205 | 626 327 41 495 242 38       | 994 775    | 0.00     | 0.9880694     | 1  | 1.00   | 0.85          | 1.18          | 1.00   | 0.72          | 1.39            |
| WHS      | 6    | 0.231 0.214 | 398 241 35 414 227 30       | 674 671    | 1.12     | 0.2890838     | 1  | 0.91   | 0.75          | 1.09          | 0.82   | 0.57          | 1.18            |
| PBCS 1+2 | 22   | 0.250 0.252 | 1263 839 142 1183 773 142   | 2244 2098  | 0.07     | 0.7902235     | 1  | 1.01   | 0.92          | 1.12          | 1.03   | 0.85          | 1.25            |

Locus Alleles Chr Location Neighborhood  
rs37936 A|G 7q21.11 79806994

| SUBSET   | Rank | MAF         | Geno Counts                   | Subjects   | score X2 | score p-value | df | het OR | het OR 95% CI | het OR 95% CI | hom OR | hom OR 95% CI | hom OR 95% CI_u |
|----------|------|-------------|-------------------------------|------------|----------|---------------|----|--------|---------------|---------------|--------|---------------|-----------------|
| STAGE1-3 | 15   | 0.384 0.371 | 3916 4697 1559 3704 4197 1330 | 10172 9231 | 6.94     | 0.0084133     | 1  | 0.95   | 0.91          | 0.99          | 0.90   | 0.83          | 0.97            |
| NHS      | 10   | 0.400 0.365 | 403 541 178 474 476 171       | 1122 1121  | 6.29     | 0.012149      | 1  | 0.86   | 0.76          | 0.97          | 0.74   | 0.58          | 0.94            |
| STAGE1-2 | 3    | 0.400 0.368 | 1731 2149 797 1897 2074 674   | 4677 4645  | 20.53    | 5.86E-06      | 1  | 0.87   | 0.82          | 0.93          | 0.76   | 0.68          | 0.86            |
| STAGE2   | 3    | 0.400 0.369 | 1328 1608 619 1423 1598 503   | 3555 3524  | 14.31    | 1.55E-04      | 1  | 0.88   | 0.82          | 0.94          | 0.77   | 0.68          | 0.88            |
| CPSII    | 19   | 0.387 0.373 | 199 251 79 202 249 70         | 529 521    | 0.28     | 0.593905      | 1  | 0.95   | 0.80          | 1.14          | 0.91   | 0.63          | 1.30            |
| PLCO     | 22   | 0.378 0.376 | 379 431 146 373 394 147       | 956 914    | 0.06     | 0.8121731     | 1  | 0.98   | 0.86          | 1.12          | 0.97   | 0.75          | 1.26            |
| WHI      | 1    | 0.409 0.368 | 857 1064 430 933 1084 316     | 2351 2333  | 16.74    | 4.28E-05      | 1  | 0.84   | 0.78          | 0.91          | 0.71   | 0.60          | 0.84            |
| STAGE3   | 11   | 0.371 0.377 | 1992 2333 700 1552 1840 573   | 5025 3965  | 0.58     | 0.4463214     | 1  | 1.02   | 0.96          | 1.09          | 1.05   | 0.93          | 1.19            |
| NHS2     | 6    | 0.366 0.398 | 457 508 157 212 261 96        | 1122 569   | 3.14     | 0.0762009     | 1  | 1.14   | 0.99          | 1.32          | 1.30   | 0.97          | 1.73            |
| NOR      | 11   | 0.364 0.345 | 202 227 67 221 233 61         | 496 515    | 0.90     | 0.3437393     | 1  | 0.92   | 0.76          | 1.10          | 0.84   | 0.58          | 1.21            |
| PBCS2    | 18   | 0.368 0.364 | 706 782 248 568 669 183       | 1736 1420  | 0.16     | 0.6892231     | 1  | 0.98   | 0.88          | 1.09          | 0.96   | 0.78          | 1.18            |
| USRT     | 13   | 0.393 0.403 | 356 496 143 283 364 132       | 995 779    | 0.44     | 0.5082467     | 1  | 1.05   | 0.91          | 1.20          | 1.10   | 0.83          | 1.44            |
| WHS      | 12   | 0.362 0.378 | 271 320 85 268 313 101        | 676 682    | 0.64     | 0.422408      | 1  | 1.07   | 0.91          | 1.25          | 1.14   | 0.83          | 1.55            |
| PBCS 1+2 | 20   | 0.367 0.364 | 899 997 310 823 952 266       | 2206 2041  | 0.10     | 0.7515016     | 1  | 0.99   | 0.90          | 1.08          | 0.97   | 0.81          | 1.16            |

Locus Alleles Chr Location Neighborhood  
rs12608723 A|G 19q13.11 38508973

| SUBSET   | Rank | MAF         | Geno Counts                 | Subjects   | score X2 | score p-value | df | het OR | het OR 95% CI | het OR 95% CI | hom OR | hom OR 95% CI | hom OR 95% CI_u |
|----------|------|-------------|-----------------------------|------------|----------|---------------|----|--------|---------------|---------------|--------|---------------|-----------------|
| STAGE1-3 | 16   | 0.136 0.128 | 7735 2378 217 7155 2085 163 | 10330 9403 | 6.36     | 0.0116827     | 1  | 0.93   | 0.88          | 0.98          | 0.86   | 0.77          | 0.97            |

|          |    |             |                            |           |       |           |   |      |      |      |      |      |      |
|----------|----|-------------|----------------------------|-----------|-------|-----------|---|------|------|------|------|------|------|
| NHS      | 4  | 0.153 0.123 | 819 296 27 877 252 15      | 1142 1144 | 9.46  | 0.0020945 | 1 | 0.77 | 0.65 | 0.91 | 0.59 | 0.42 | 0.82 |
| STAGE1-2 | 12 | 0.143 0.126 | 3888 1281 116 4158 1190 91 | 5285 5439 | 13.25 | 2.72E-04  | 1 | 0.86 | 0.80 | 0.94 | 0.75 | 0.64 | 0.87 |
| STAGE2   | 16 | 0.140 0.127 | 3069 985 89 3281 938 76    | 4143 4295 | 6.27  | 0.0123068 | 1 | 0.89 | 0.82 | 0.98 | 0.80 | 0.67 | 0.95 |
| CPSII    | 10 | 0.140 0.120 | 398 138 7 417 108 10       | 543 535   | 1.37  | 0.2416355 | 1 | 0.86 | 0.66 | 1.11 | 0.74 | 0.44 | 1.23 |
| PBCS1    | 7  | 0.153 0.129 | 364 129 13 510 146 13      | 506 669   | 2.40  | 0.1214822 | 1 | 0.83 | 0.66 | 1.05 | 0.69 | 0.43 | 1.10 |
| PLCO     | 18 | 0.132 0.124 | 738 216 21 732 196 20      | 975 948   | 0.51  | 0.4739094 | 1 | 0.93 | 0.77 | 1.13 | 0.87 | 0.60 | 1.27 |
| WHI      | 17 | 0.141 0.128 | 1783 572 54 1818 540 36    | 2409 2394 | 3.62  | 0.057015  | 1 | 0.89 | 0.79 | 1.00 | 0.80 | 0.63 | 1.01 |
| STAGE3   | 20 | 0.129 0.132 | 3849 1100 101 2997 901 72  | 5050 3970 | 0.11  | 0.7399786 | 1 | 1.01 | 0.93 | 1.11 | 1.03 | 0.87 | 1.23 |
| NHS2     | 19 | 0.126 0.123 | 869 243 21 433 113 12      | 1133 558  | 0.07  | 0.7978548 | 1 | 0.97 | 0.79 | 1.20 | 0.95 | 0.62 | 1.45 |
| NOR      | 2  | 0.128 0.167 | 380 103 12 356 148 12      | 495 516   | 6.17  | 0.0130207 | 1 | 1.37 | 1.07 | 1.75 | 1.87 | 1.14 | 3.07 |
| PBCS2    | 13 | 0.124 0.118 | 1344 368 32 1120 300 20    | 1744 1440 | 0.51  | 0.4754138 | 1 | 0.95 | 0.81 | 1.10 | 0.90 | 0.66 | 1.21 |
| USRT     | 22 | 0.138 0.142 | 736 239 17 573 191 15      | 992 779   | 0.02  | 0.8963976 | 1 | 1.01 | 0.83 | 1.23 | 1.03 | 0.70 | 1.51 |
| WHS      | 18 | 0.135 0.129 | 520 147 19 515 149 13      | 686 677   | 0.17  | 0.6796931 | 1 | 0.96 | 0.77 | 1.19 | 0.91 | 0.59 | 1.41 |
| PBCS 1+2 | 7  | 0.130 0.120 | 1706 494 45 1630 440 33    | 2245 2103 | 2.50  | 0.1136209 | 1 | 0.90 | 0.80 | 1.02 | 0.81 | 0.63 | 1.05 |

| Locus    | Alleles | Chr         | Location                      | Neighborhood |          |               |    |        |               |               |        |               |                 |  |
|----------|---------|-------------|-------------------------------|--------------|----------|---------------|----|--------|---------------|---------------|--------|---------------|-----------------|--|
| rs998592 | G A     | 16p13.13    |                               | 11107179     | CLEC16A  |               |    |        |               |               |        |               |                 |  |
| SUBSET   | Rank    | MAF         | Geno Counts                   | Subjects     | score X2 | score p-value | df | het OR | het OR 95% CI | het OR 95% CI | hom OR | hom OR 95% CI | hom OR 95% CI_u |  |
| STAGE1-3 | 17      | 0.424 0.413 | 3455 4960 1895 3179 4677 1549 | 10310 9405   | 4.99     | 0.0255178     | 1  | 0.95   | 0.92          | 0.99          | 0.91   | 0.84          | 0.99            |  |
| NHS      | 21      | 0.425 0.431 | 405 502 233 349 605 191       | 1140 1145    | 0.17     | 0.6838614     | 1  | 1.02   | 0.91          | 1.15          | 1.05   | 0.83          | 1.33            |  |
| STAGE1-2 | 20      | 0.436 0.419 | 1716 2524 1043 1778 2767 895  | 5283 5440    | 6.10     | 0.0135267     | 1  | 0.93   | 0.88          | 0.99          | 0.87   | 0.78          | 0.97            |  |
| STAGE2   | 12      | 0.440 0.416 | 1311 2022 810 1429 2162 704   | 4143 4295    | 9.07     | 0.0026052     | 1  | 0.91   | 0.85          | 0.97          | 0.83   | 0.73          | 0.94            |  |
| CPSII    | 1       | 0.475 0.415 | 158 254 131 184 258 93        | 543 535      | 7.17     | 0.0074005     | 1  | 0.79   | 0.67          | 0.94          | 0.63   | 0.45          | 0.88            |  |
| PBCS1    | 3       | 0.415 0.369 | 186 220 100 264 316 89        | 506 669      | 4.17     | 0.0410616     | 1  | 0.84   | 0.71          | 0.99          | 0.71   | 0.50          | 0.99            |  |
| PLCO     | 20      | 0.419 0.411 | 324 485 166 320 476 152       | 975 948      | 0.26     | 0.6131115     | 1  | 0.97   | 0.85          | 1.10          | 0.93   | 0.72          | 1.22            |  |
| WHI      | 19      | 0.450 0.433 | 729 1192 488 743 1229 422     | 2409 2394    | 2.98     | 0.0842612     | 1  | 0.93   | 0.86          | 1.01          | 0.87   | 0.74          | 1.02            |  |
| STAGE3   | 14      | 0.412 0.406 | 1739 2436 853 1402 1912 654   | 5028 3968    | 0.41     | 0.523455      | 1  | 0.98   | 0.92          | 1.04          | 0.96   | 0.85          | 1.09            |  |
| NHS2     | 13      | 0.417 0.427 | 378 542 193 187 267 105       | 1113 559     | 0.29     | 0.5918245     | 1  | 1.04   | 0.90          | 1.20          | 1.08   | 0.81          | 1.45            |  |
| NOR      | 19      | 0.390 0.400 | 186 231 77 187 245 84         | 494 516      | 0.19     | 0.6651726     | 1  | 1.04   | 0.87          | 1.24          | 1.08   | 0.76          | 1.54            |  |
| PBCS2    | 16      | 0.400 0.394 | 625 849 274 528 682 223       | 1748 1433    | 0.34     | 0.5610134     | 1  | 0.97   | 0.88          | 1.07          | 0.94   | 0.77          | 1.15            |  |
| USRT     | 6       | 0.439 0.415 | 313 490 192 268 373 136       | 995 777      | 2.16     | 0.1418561     | 1  | 0.90   | 0.79          | 1.03          | 0.82   | 0.62          | 1.07            |  |
| WHS      | 22      | 0.412 0.408 | 237 324 117 232 345 106       | 678 683      | 0.04     | 0.8459726     | 1  | 0.98   | 0.84          | 1.15          | 0.97   | 0.71          | 1.32            |  |
| PBCS 1+2 | 8       | 0.403 0.386 | 811 1069 373 791 996 312      | 2253 2099    | 2.33     | 0.1272096     | 1  | 0.93   | 0.86          | 1.02          | 0.87   | 0.74          | 1.04            |  |

| Locus     | Alleles | Chr         | Location                      | Neighborhood |          |               |    |        |               |               |        |               |                 |  |
|-----------|---------|-------------|-------------------------------|--------------|----------|---------------|----|--------|---------------|---------------|--------|---------------|-----------------|--|
| rs3817198 | T C     | 11p15.5     |                               | 1865582      | LSP1     |               |    |        |               |               |        |               |                 |  |
| SUBSET    | Rank    | MAF         | Geno Counts                   | Subjects     | score X2 | score p-value | df | het OR | het OR 95% CI | het OR 95% CI | hom OR | hom OR 95% CI | hom OR 95% CI_u |  |
| STAGE1-3  | 18      | 0.322 0.332 | 4732 4516 1068 4222 4118 1068 | 10316 9408   | 4.28     | 0.0386333     | 1  | 1.05   | 1.00          | 1.09          | 1.09   | 1.00          | 1.19            |  |
| NHS       | 18      | 0.318 0.330 | 524 510 108 514 505 125       | 1142 1144    | 0.77     | 0.3804685     | 1  | 1.06   | 0.93          | 1.20          | 1.12   | 0.87          | 1.44            |  |
| STAGE1-2  | 21      | 0.325 0.341 | 2407 2312 562 2371 2415 643   | 5281 5429    | 5.06     | 0.0244592     | 1  | 1.07   | 1.01          | 1.13          | 1.14   | 1.02          | 1.28            |  |
| STAGE2    | 21      | 0.327 0.344 | 1883 1802 454 1857 1910 518   | 4139 4285    | 4.31     | 0.0377779     | 1  | 1.07   | 1.00          | 1.14          | 1.15   | 1.01          | 1.30            |  |
| CPSII     | 16      | 0.334 0.345 | 243 231 64 235 227 70         | 538 532      | 0.35     | 0.5521196     | 1  | 1.06   | 0.88          | 1.26          | 1.11   | 0.78          | 1.59            |  |
| PBCS1     | 16      | 0.319 0.333 | 229 228 47 292 299 71         | 504 662      | 0.25     | 0.6159112     | 1  | 1.05   | 0.87          | 1.25          | 1.10   | 0.76          | 1.57            |  |
| PLCO      | 21      | 0.335 0.344 | 440 417 118 397 449 101       | 975 947      | 0.06     | 0.8039682     | 1  | 1.02   | 0.89          | 1.16          | 1.03   | 0.79          | 1.36            |  |
| WHI       | 15      | 0.326 0.346 | 1097 1051 260 1047 1038 309   | 2408 2394    | 4.28     | 0.0386638     | 1  | 1.09   | 1.00          | 1.19          | 1.19   | 1.01          | 1.41            |  |
| STAGE3    | 17      | 0.319 0.322 | 2324 2205 506 1845 1706 426   | 5035 3977    | 0.18     | 0.6753061     | 1  | 1.01   | 0.95          | 1.08          | 1.03   | 0.91          | 1.17            |  |
| NHS2      | 16      | 0.317 0.311 | 518 491 109 277 232 61        | 1118 570     | 0.15     | 0.6959429     | 1  | 0.97   | 0.83          | 1.13          | 0.94   | 0.69          | 1.28            |  |
| NOR       | 5       | 0.262 0.290 | 269 194 33 258 215 42         | 496 515      | 2.10     | 0.1473198     | 1  | 1.16   | 0.95          | 1.41          | 1.34   | 0.90          | 1.99            |  |
| PBCS2     | 11      | 0.330 0.339 | 789 789 189 634 637 171       | 1767 1442    | 0.58     | 0.4479135     | 1  | 1.04   | 0.94          | 1.16          | 1.08   | 0.88          | 1.34            |  |
| USRT      | 7       | 0.338 0.317 | 442 434 119 366 331 81        | 995 778      | 2.12     | 0.1452375     | 1  | 0.90   | 0.78          | 1.04          | 0.81   | 0.61          | 1.08            |  |
| WHS       | 14      | 0.310 0.322 | 306 297 56 310 291 71         | 659 672      | 0.44     | 0.5058292     | 1  | 1.06   | 0.90          | 1.25          | 1.12   | 0.80          | 1.56            |  |
| PBCS 1+2  | 14      | 0.328 0.336 | 1019 1016 236 932 933 241     | 2271 2106    | 0.84     | 0.3588361     | 1  | 1.04   | 0.95          | 1.14          | 1.09   | 0.91          | 1.30            |  |

| Locus     | Alleles | Chr    | Location | Neighborhood |
|-----------|---------|--------|----------|--------------|
| rs4666451 | G A     | 2p24.1 |          | 19150424     |

| SUBSET   | Rank | MAF         | Geno Counts                   | Subjects  | score X2 | score p-value | df | het OR | het OR 95% CI | het OR 95% CI | hom OR | hom OR 95% I | hom OR 95% CI_u |
|----------|------|-------------|-------------------------------|-----------|----------|---------------|----|--------|---------------|---------------|--------|--------------|-----------------|
| STAGE1-3 | 19   | 0.391 0.382 | 3412 4325 1424/3148 3915 1197 | 9161 8260 | 3.62     | 0.0571613     | 1  | 0.96   | 0.92          | 1.00          | 0.92   | 0.84         | 1.00            |
| STAGE1-2 | 17   | 0.398 0.376 | 1509 1968 666/1657 2045 593   | 4143 4295 | 9.29     | 0.0023019     | 1  | 0.91   | 0.85          | 0.97          | 0.82   | 0.73         | 0.93            |
| STAGE2   | 10   | 0.398 0.376 | 1509 1968 666/1657 2045 593   | 4143 4295 | 9.37     | 0.0022044     | 1  | 0.91   | 0.85          | 0.97          | 0.82   | 0.73         | 0.93            |
| CPSII    | 21   | 0.394 0.400 | 201 256 86/177 288 70         | 543 535   | 0.02     | 0.8995977     | 1  | 1.01   | 0.85          | 1.21          | 1.02   | 1.02         | 1.46            |
| PBCS1    | 9    | 0.409 0.380 | 176 246 84/257 316 96         | 506 669   | 2.19     | 0.1385464     | 1  | 0.88   | 0.74          | 1.04          | 0.77   | 0.55         | 1.09            |
| PLCO     | 11   | 0.393 0.373 | 355 474 146/363 462 123       | 975 948   | 1.83     | 0.1761889     | 1  | 0.91   | 0.80          | 1.04          | 0.83   | 0.64         | 1.09            |
| WHI      | 10   | 0.397 0.372 | 890 1125 394/950 1105 339     | 2409 2394 | 5.85     | 0.0155669     | 1  | 0.90   | 0.83          | 0.98          | 0.82   | 0.69         | 0.96            |
| STAGE3   | 19   | 0.386 0.388 | 1905 2358 758/1491 1874 604   | 5021 3969 | 0.11     | 0.7377645     | 1  | 1.01   | 0.95          | 1.07          | 1.02   | 0.90         | 1.15            |
| NHS2     | 22   | 0.382 0.384 | 428 504 169/211 263 82        | 1101 556  | 0.01     | 0.9249408     | 1  | 1.01   | 0.87          | 1.17          | 1.01   | 0.76         | 1.36            |
| NOR      | 17   | 0.363 0.355 | 201 230 65/214 238 64         | 496 516   | 0.25     | 0.6155384     | 1  | 0.95   | 0.79          | 1.15          | 0.91   | 0.63         | 1.32            |
| PBCS2    | 9    | 0.399 0.411 | 621 858 268/504 692 247       | 1747 1443 | 0.92     | 0.3369832     | 1  | 1.05   | 0.95          | 1.16          | 1.10   | 0.90         | 1.35            |
| USRT     | 10   | 0.382 0.370 | 389 452 154/309 358 108       | 995 775   | 0.69     | 0.4046393     | 1  | 0.94   | 0.82          | 1.08          | 0.89   | 0.68         | 1.17            |
| WHS      | 16   | 0.380 0.390 | 266 314 102/253 323 103       | 682 679   | 0.27     | 0.6029523     | 1  | 1.04   | 0.89          | 1.21          | 1.09   | 0.80         | 1.48            |
| PBCS 1+2 | 24   | 0.402 0.401 | 795 1103 352/761 1004 343     | 2250 2108 | 0.00     | 0.9735245     | 1  | 1.00   | 0.92          | 1.09          | 1.00   | 0.84         | 1.19            |

Locus rs7936636 Alleles C|T Chr 11p11.2 Location Neighborhood 44397546

| SUBSET   | Rank | MAF         | Geno Counts                 | Subjects   | score X2 | score p-value | df | het OR | het OR 95% CI | het OR 95% CI | hom OR | hom OR 95% I | hom OR 95% CI_u |
|----------|------|-------------|-----------------------------|------------|----------|---------------|----|--------|---------------|---------------|--------|--------------|-----------------|
| STAGE1-3 | 20   | 0.254 0.246 | 5706 3954 643/5366 3460 582 | 10303 9408 | 3.48     | 0.0619335     | 1  | 0.96   | 0.91          | 1.00          | 0.92   | 0.84         | 1.00            |
| NHS      | 15   | 0.256 0.240 | 635 430 77/673 395 77       | 1142 1145  | 1.54     | 0.2139138     | 1  | 0.92   | 0.81          | 1.05          | 0.85   | 0.65         | 1.10            |
| STAGE1-2 | 16   | 0.263 0.244 | 2852 2086 344/3144 1940 355 | 5282 5439  | 9.79     | 0.0017566     | 1  | 0.91   | 0.85          | 0.96          | 0.82   | 0.73         | 0.93            |
| STAGE2   | 13   | 0.264 0.245 | 2217 1656 267/2471 1545 278 | 4140 4294  | 8.32     | 0.003913      | 1  | 0.90   | 0.84          | 0.97          | 0.81   | 0.71         | 0.94            |
| CPSII    | 4    | 0.266 0.233 | 286 224 32/323 175 37       | 542 535    | 3.24     | 0.0717239     | 1  | 0.84   | 0.69          | 1.02          | 0.70   | 0.47         | 1.03            |
| PBCS1    | 11   | 0.247 0.226 | 284 193 28/406 222 40       | 505 668    | 1.19     | 0.2753319     | 1  | 0.90   | 0.74          | 1.09          | 0.81   | 0.55         | 1.19            |
| PLCO     | 13   | 0.263 0.249 | 526 385 64/546 332 70       | 975 948    | 1.34     | 0.2474853     | 1  | 0.92   | 0.79          | 1.06          | 0.84   | 0.63         | 1.13            |
| WHI      | 7    | 0.270 0.247 | 1272 973 163/1358 890 146   | 2408 2394  | 6.52     | 0.0106444     | 1  | 0.89   | 0.81          | 0.97          | 0.79   | 0.65         | 0.95            |
| STAGE3   | 12   | 0.246 0.249 | 2854 1868 299/2222 1521 226 | 5021 3969  | 0.57     | 0.4492485     | 1  | 1.03   | 0.96          | 1.10          | 1.06   | 0.92         | 1.21            |
| NHS2     | 4    | 0.266 0.235 | 598 438 77/330 197 33       | 1113 560   | 3.78     | 0.0517916     | 1  | 0.85   | 0.72          | 1.00          | 0.72   | 0.51         | 1.00            |
| NOR      | 1    | 0.192 0.237 | 326 153 19/301 185 30       | 498 516    | 6.54     | 0.0105328     | 1  | 1.32   | 1.07          | 1.64          | 1.74   | 1.14         | 2.68            |
| PBCS2    | 2    | 0.245 0.264 | 993 643 105/769 569 94      | 1741 1432  | 3.07     | 0.0797158     | 1  | 1.11   | 0.99          | 1.24          | 1.23   | 0.98         | 1.54            |
| USRT     | 9    | 0.254 0.240 | 553 376 64/442 301 37       | 993 780    | 0.83     | 0.3617171     | 1  | 0.93   | 0.79          | 1.09          | 0.86   | 0.63         | 1.18            |
| WHS      | 21   | 0.241 0.244 | 384 258 34/380 269 32       | 676 681    | 0.04     | 0.8338754     | 1  | 1.02   | 0.85          | 1.22          | 1.04   | 0.72         | 1.49            |
| PBCS 1+2 | 15   | 0.245 0.252 | 1277 836 133/1175 790 135   | 2246 2100  | 0.80     | 0.3714725     | 1  | 1.05   | 0.95          | 1.15          | 1.09   | 0.90         | 1.33            |

Locus rs2391406 Alleles T|G Chr 13q33.3 Location Neighborhood 106586873

| SUBSET   | Rank | MAF         | Geno Counts                   | Subjects   | score X2 | score p-value | df | het OR | het OR 95% CI | het OR 95% CI | hom OR | hom OR 95% I | hom OR 95% CI_u |
|----------|------|-------------|-------------------------------|------------|----------|---------------|----|--------|---------------|---------------|--------|--------------|-----------------|
| STAGE1-3 | 21   | 0.371 0.364 | 4130 4683 1470/3746 4431 1190 | 10283 9367 | 2.52     | 0.1120642     | 1  | 0.97   | 0.93          | 1.01          | 0.94   | 0.86         | 1.02            |
| NHS      | 19   | 0.372 0.363 | 452 529 160/460 538 146       | 1141 1144  | 0.30     | 0.5861755     | 1  | 0.97   | 0.86          | 1.09          | 0.94   | 0.73         | 1.19            |
| STAGE1-2 | 19   | 0.375 0.359 | 2110 2378 789/2188 2594 652   | 5277 5434  | 6.27     | 0.0122848     | 1  | 0.93   | 0.88          | 0.98          | 0.87   | 0.78         | 0.97            |
| STAGE2   | 15   | 0.376 0.358 | 1658 1849 629/1728 2056 506   | 4136 4290  | 6.45     | 0.0111114     | 1  | 0.92   | 0.87          | 0.98          | 0.85   | 0.75         | 0.96            |
| CPSII    | 3    | 0.371 0.333 | 217 240 79/228 251 51         | 536 530    | 3.77     | 0.0520469     | 1  | 0.84   | 0.70          | 1.00          | 0.70   | 0.49         | 1.00            |
| PBCS1    | 15   | 0.387 0.374 | 195 230 81/242 351 74         | 506 667    | 0.44     | 0.5062495     | 1  | 0.94   | 0.79          | 1.12          | 0.89   | 0.62         | 1.26            |
| PLCO     | 7    | 0.376 0.350 | 398 416 157/393 445 109       | 971 947    | 2.79     | 0.0948389     | 1  | 0.89   | 0.78          | 1.02          | 0.80   | 0.61         | 1.04            |
| WHI      | 21   | 0.372 0.360 | 971 1084 353/966 1133 295     | 2408 2394  | 1.51     | 0.2187011     | 1  | 0.95   | 0.87          | 1.03          | 0.90   | 0.76         | 1.06            |
| STAGE3   | 18   | 0.366 0.370 | 2020 2309 681/1558 1839 538   | 5010 3935  | 0.13     | 0.7142303     | 1  | 1.01   | 0.95          | 1.08          | 1.02   | 0.90         | 1.16            |
| NHS2     | 2    | 0.341 0.379 | 493 477 140/216 265 80        | 1110 561   | 4.55     | 0.0330055     | 1  | 1.17   | 1.01          | 1.36          | 1.38   | 1.03         | 1.85            |
| NOR      | 21   | 0.366 0.372 | 207 214 74/201 245 69         | 495 515    | 0.07     | 0.7885146     | 1  | 1.02   | 0.86          | 1.23          | 1.05   | 0.73         | 1.50            |
| PBCS2    | 23   | 0.380 0.382 | 656 853 236/542 686 203       | 1745 1431  | 0.04     | 0.836907      | 1  | 1.01   | 0.91          | 1.12          | 1.02   | 0.83         | 1.26            |
| USRT     | 21   | 0.359 0.365 | 410 454 130/309 368 99        | 994 776    | 0.09     | 0.7686747     | 1  | 1.02   | 0.89          | 1.17          | 1.04   | 0.79         | 1.38            |
| WHS      | 1    | 0.385 0.344 | 254 311 101/290 275 87        | 666 652    | 4.57     | 0.0324944     | 1  | 0.84   | 0.72          | 0.99          | 0.71   | 0.52         | 0.97            |
| PBCS 1+2 | 23   | 0.381 0.379 | 851 1079 317/784 1035 277     | 2247 2096  | 0.01     | 0.9260593     | 1  | 1.00   | 0.91          | 1.09          | 0.99   | 0.83         | 1.18            |



| Locus      | Alleles | Chr         | Location                      | Neighborhood |             |               |    |        |               |               |        |               |               |                 |  |
|------------|---------|-------------|-------------------------------|--------------|-------------|---------------|----|--------|---------------|---------------|--------|---------------|---------------|-----------------|--|
| rs11077820 | T C     | 17q25.1     |                               | 71966263     | UBE2O,AANAT |               |    |        |               |               |        |               |               |                 |  |
| SUBSET     | Rank    | MAF         | Geno Counts                   | Subjects     | score X2    | score p-value | df | het OR | het OR 95% CI | het OR 95% CI | hom OR | hom OR 95% CI | hom OR 95% CI | hom OR 95% CI_u |  |
| STAGE1-3   | 22      | 0.371 0.365 | 4056 4814 1411 3845 4226 1308 | 10281 9379   | 2.26        | 0.1330961     | 1  | 0.97   | 0.93          | 1.01          | 0.94   | 0.86          | 0.86          | 1.02            |  |
| NHS        | 16      | 0.382 0.370 | 429 553 160 475 492 178       | 1142 1145    | 1.05        | 0.3046602     | 1  | 0.94   | 0.83          | 1.06          | 0.88   | 0.88          | 0.70          | 1.12            |  |
| STAGE1-2   | 18      | 0.383 0.367 | 1953 2611 715 2229 2429 778   | 5279 5436    | 7.14        | 0.0075575     | 1  | 0.93   | 0.88          | 0.98          | 0.86   | 0.77          | 0.96          | 0.96            |  |
| STAGE2     | 18      | 0.383 0.366 | 1524 2058 555 1754 1937 600   | 4137 4291    | 6.13        | 0.0132661     | 1  | 0.92   | 0.87          | 0.98          | 0.85   | 0.75          | 0.97          | 0.97            |  |
| CPSII      | 23      | 0.377 0.374 | 216 242 83 205 260 70         | 541 535      | 0.01        | 0.9336683     | 1  | 0.99   | 0.83          | 1.18          | 0.99   | 0.69          | 1.40          | 1.40            |  |
| PBCS1      | 13      | 0.375 0.353 | 193 244 67 284 298 87         | 504 669      | 0.96        | 0.3267839     | 1  | 0.92   | 0.77          | 1.09          | 0.84   | 0.59          | 1.19          | 1.19            |  |
| PLCO       | 12      | 0.371 0.355 | 371 484 120 395 430 121       | 975 946      | 1.64        | 0.2001604     | 1  | 0.92   | 0.80          | 1.05          | 0.84   | 0.64          | 1.10          | 1.10            |  |
| WHI        | 20      | 0.385 0.374 | 871 1215 320 962 1071 359     | 2406 2392    | 1.53        | 0.2153715     | 1  | 0.95   | 0.87          | 1.03          | 0.90   | 0.76          | 1.06          | 1.06            |  |
| STAGE3     | 15      | 0.359 0.362 | 2103 2202 697 1617 1799 530   | 5002 3946    | 0.40        | 0.5248131     | 1  | 1.02   | 0.96          | 1.08          | 1.04   | 0.92          | 1.18          | 1.18            |  |
| NHS2       | 12      | 0.364 0.374 | 446 495 150 219 253 80        | 1091 552     | 0.30        | 0.5869866     | 1  | 1.04   | 0.90          | 1.21          | 1.09   | 0.81          | 1.46          | 1.46            |  |
| NOR        | 15      | 0.329 0.316 | 225 216 55 233 237 44         | 496 514      | 0.39        | 0.5313379     | 1  | 0.94   | 0.78          | 1.14          | 0.89   | 0.60          | 1.30          | 1.30            |  |
| PBCS2      | 5       | 0.359 0.375 | 732 784 238 563 671 204       | 1754 1438    | 1.69        | 0.1930783     | 1  | 1.07   | 0.97          | 1.18          | 1.14   | 0.93          | 1.40          | 1.40            |  |
| USRT       | 18      | 0.371 0.380 | 405 441 148 303 353 118       | 994 774      | 0.13        | 0.7188197     | 1  | 1.03   | 0.90          | 1.17          | 1.05   | 0.80          | 1.38          | 1.38            |  |
| WHS        | 8       | 0.358 0.339 | 295 266 106 299 285 84        | 667 668      | 1.01        | 0.3141812     | 1  | 0.92   | 0.79          | 1.08          | 0.85   | 0.63          | 1.16          | 1.16            |  |
| PBCS 1+2   | 18      | 0.362 0.368 | 925 1029 304 846 967 291      | 2258 2104    | 0.26        | 0.610788      | 1  | 1.02   | 0.94          | 1.12          | 1.05   | 0.88          | 1.25          | 1.25            |  |

| Locus      | Alleles | Chr         | Location                    | Neighborhood |          |               |    |        |               |               |        |               |               |                 |  |
|------------|---------|-------------|-----------------------------|--------------|----------|---------------|----|--------|---------------|---------------|--------|---------------|---------------|-----------------|--|
| rs17740709 | A G     | 12q21.31    |                             | 81947471     | TMT2C    |               |    |        |               |               |        |               |               |                 |  |
| SUBSET     | Rank    | MAF         | Geno Counts                 | Subjects     | score X2 | score p-value | df | het OR | het OR 95% CI | het OR 95% CI | hom OR | hom OR 95% CI | hom OR 95% CI | hom OR 95% CI_u |  |
| STAGE1-3   | 23      | 0.220 0.215 | 6248 3554 485 5841 3051 491 | 10287 9383   | 1.84     | 0.1746109     | 1  | 0.97   | 0.92          | 1.01          | 0.94   | 0.85          | 1.03          | 1.03            |  |
| NHS        | 20      | 0.218 0.212 | 692 402 48 725 355 65       | 1142 1145    | 0.21     | 0.6475572     | 1  | 0.97   | 0.84          | 1.11          | 0.94   | 0.71          | 1.24          | 1.24            |  |
| STAGE1-2   | 23      | 0.218 0.214 | 3201 1869 215 3403 1742 295 | 5285 5440    | 0.51     | 0.4769407     | 1  | 0.98   | 0.92          | 1.04          | 0.95   | 0.84          | 1.09          | 1.09            |  |
| STAGE2     | 23      | 0.217 0.215 | 2509 1467 167 2678 1387 230 | 4143 4295    | 0.32     | 0.5713257     | 1  | 0.98   | 0.91          | 1.05          | 0.96   | 0.83          | 1.11          | 1.11            |  |
| CPSII      | 12      | 0.215 0.200 | 328 197 18 343 170 22       | 543 535      | 0.85     | 0.3560504     | 1  | 0.90   | 0.73          | 1.12          | 0.82   | 0.53          | 1.26          | 1.26            |  |
| PBCS1      | 18      | 0.242 0.247 | 282 203 21 383 241 45       | 506 669      | 0.21     | 0.6475451     | 1  | 1.05   | 0.86          | 1.27          | 1.10   | 0.74          | 1.62          | 1.62            |  |
| PLCO       | 15      | 0.214 0.203 | 603 326 46 610 291 47       | 975 948      | 1.02     | 0.3121127     | 1  | 0.92   | 0.79          | 1.08          | 0.85   | 0.63          | 1.16          | 1.16            |  |
| WHI        | 23      | 0.215 0.212 | 1466 851 92 1504 764 126    | 2409 2394    | 0.11     | 0.737969      | 1  | 0.98   | 0.89          | 1.08          | 0.97   | 0.80          | 1.18          | 1.18            |  |
| STAGE3     | 10      | 0.222 0.216 | 3047 1686 270 2439 1311 196 | 5003 3946    | 1.23     | 0.2675393     | 1  | 0.96   | 0.89          | 1.03          | 0.92   | 0.80          | 1.06          | 1.06            |  |
| NHS2       | 23      | 0.210 0.209 | 694 349 56 342 183 23       | 1099 548     | 0.00     | 0.9543065     | 1  | 0.99   | 0.83          | 1.19          | 0.99   | 0.70          | 1.41          | 1.41            |  |
| NOR        | 4       | 0.243 0.205 | 281 187 27 328 161 25       | 495 514      | 4.11     | 0.0425605     | 1  | 0.81   | 0.65          | 0.99          | 0.65   | 0.43          | 0.99          | 0.99            |  |
| PBCS2      | 12      | 0.234 0.240 | 1042 597 112 836 508 91     | 1751 1435    | 0.51     | 0.4744954     | 1  | 1.04   | 0.93          | 1.17          | 1.09   | 0.87          | 1.37          | 1.37            |  |
| USRT       | 8       | 0.212 0.195 | 612 339 41 501 250 27       | 992 778      | 1.81     | 0.1782308     | 1  | 0.89   | 0.75          | 1.05          | 0.79   | 0.57          | 1.11          | 1.11            |  |
| WHS        | 13      | 0.212 0.200 | 418 214 34 432 209 30       | 666 671      | 0.51     | 0.4768434     | 1  | 0.94   | 0.78          | 1.12          | 0.87   | 0.60          | 1.27          | 1.27            |  |
| PBCS 1+2   | 17      | 0.236 0.243 | 1324 799 133 1218 747 136   | 2256 2101    | 0.36     | 0.5501258     | 1  | 1.03   | 0.93          | 1.14          | 1.06   | 0.87          | 1.29          | 1.29            |  |

| Locus     | Alleles | Chr         | Location                    | Neighborhood |          |               |    |        |               |               |        |               |               |                 |  |
|-----------|---------|-------------|-----------------------------|--------------|----------|---------------|----|--------|---------------|---------------|--------|---------------|---------------|-----------------|--|
| rs7121523 | G A     | 11p15.4     |                             | 7556781      | PPFIBP2  |               |    |        |               |               |        |               |               |                 |  |
| SUBSET    | Rank    | MAF         | Geno Counts                 | Subjects     | score X2 | score p-value | df | het OR | het OR 95% CI | het OR 95% CI | hom OR | hom OR 95% CI | hom OR 95% CI | hom OR 95% CI_u |  |
| STAGE1-3  | 24      | 0.158 0.162 | 7275 2815 227 6636 2460 293 | 10317 9389   | 1.16     | 0.2824677     | 1  | 1.03   | 0.98          | 1.09          | 1.06   | 0.95          | 1.18          | 1.18            |  |
| NHS       | 17      | 0.158 0.169 | 808 306 28 810 283 52       | 1142 1145    | 0.84     | 0.3601066     | 1  | 1.07   | 0.92          | 1.25          | 1.15   | 0.85          | 1.57          | 1.57            |  |
| STAGE1-2  | 22      | 0.155 0.163 | 3740 1443 99 3857 1390 191  | 5282 5438    | 2.01     | 0.1562011     | 1  | 1.05   | 0.98          | 1.13          | 1.11   | 0.96          | 1.29          | 1.29            |  |
| STAGE2    | 22      | 0.154 0.161 | 2932 1137 71 3047 1107 139  | 4140 4293    | 1.25     | 0.2635168     | 1  | 1.05   | 0.96          | 1.14          | 1.10   | 0.93          | 1.30          | 1.30            |  |
| CPSII     | 22      | 0.173 0.177 | 368 161 13 366 147 21       | 542 534      | 0.02     | 0.9010366     | 1  | 1.01   | 0.81          | 1.27          | 1.03   | 0.66          | 1.61          | 1.61            |  |
| PBCS1     | 14      | 0.138 0.156 | 373 123 8 481 165 22        | 504 668      | 0.92     | 0.3385491     | 1  | 1.12   | 0.89          | 1.41          | 1.25   | 0.79          | 2.00          | 2.00            |  |
| PLCO      | 17      | 0.156 0.166 | 688 270 17 661 259 28       | 975 948      | 0.53     | 0.4672918     | 1  | 1.07   | 0.90          | 1.27          | 1.14   | 0.80          | 1.62          | 1.62            |  |
| WHI       | 22      | 0.154 0.159 | 1704 664 40 1710 606 77     | 2408 2393    | 0.36     | 0.5463116     | 1  | 1.03   | 0.93          | 1.16          | 1.07   | 0.86          | 1.33          | 1.33            |  |
| STAGE3    | 24      | 0.162 0.161 | 3535 1372 127 2779 1071 102 | 5034 3952    | 0.00     | 0.9966278     | 1  | 1.00   | 0.92          | 1.08          | 1.00   | 0.85          | 1.18          | 1.18            |  |
| NHS2      | 11      | 0.167 0.159 | 777 314 30 402 141 19       | 1121 562     | 0.30     | 0.5859833     | 1  | 0.95   | 0.78          | 1.15          | 0.90   | 0.61          | 1.32          | 1.32            |  |
| NOR       | 22      | 0.172 0.177 | 342 136 17 347 147 17       | 495 511      | 0.06     | 0.8082091     | 1  | 1.03   | 0.82          | 1.29          | 1.06   | 0.67          | 1.67          | 1.67            |  |
| PBCS2     | 21      | 0.148 0.151 | 1266 440 38 1023 369 31     | 1744 1423    | 0.11     | 0.7362348     | 1  | 1.02   | 0.89          | 1.18          | 1.05   | 0.79          | 1.39          | 1.39            |  |
| USRT      | 20      | 0.177 0.172 | 668 301 25 527 223 21       | 994 771      | 0.09     | 0.7592526     | 1  | 0.97   | 0.81          | 1.16          | 0.95   | 0.66          | 1.35          | 1.35            |  |

|          |    |             |                         |           |      |           |   |      |      |      |      |      |      |
|----------|----|-------------|-------------------------|-----------|------|-----------|---|------|------|------|------|------|------|
| WHS      | 23 | 0.158 0.160 | 482 181 17 480 191 14   | 680 685   | 0.02 | 0.8994666 | 1 | 1.01 | 0.82 | 1.25 | 1.03 | 0.68 | 1.55 |
| PBCS 1+2 | 13 | 0.146 0.153 | 1639 563 47 1504 533 53 | 2249 2090 | 0.87 | 0.3523337 | 1 | 1.06 | 0.94 | 1.19 | 1.12 | 0.88 | 1.42 |

**adj\_rec**

|          |         |         |          |                  |
|----------|---------|---------|----------|------------------|
| Locus    | Alleles | Chr     | Location | Neighborhood     |
| rs999737 | C T     | 14q24.1 |          | 68104435 RAD51L1 |

| SUBSET   | Rank | MAF         | Geno Counts                 | Subjects   | score X2 | score p-value | df | hom OR | hom OR 95% ( | hom OR 95% CI_u |
|----------|------|-------------|-----------------------------|------------|----------|---------------|----|--------|--------------|-----------------|
| STAGE1-3 | 1    | 0.239 0.218 | 6009 3649 640 5718 3255 422 | 10298 9395 | 26.40    | 2.77E-07      | 1  | 0.72   | 0.63         | 0.81            |
| NHS      | 2    | 0.244 0.213 | 660 406 76 703 394 47       | 1142 1144  | 7.64     | 0.0056942     | 1  | 0.59   | 0.41         | 0.86            |
| STAGE1-2 | 3    | 0.239 0.212 | 3092 1863 330 3354 1858 226 | 5285 5438  | 23.83    | 1.05E-06      | 1  | 0.65   | 0.55         | 0.77            |
| STAGE2   | 4    | 0.237 0.212 | 2432 1457 254 2651 1464 179 | 4143 4294  | 16.28    | 5.47E-05      | 1  | 0.67   | 0.55         | 0.81            |
| CPSII    | 21   | 0.235 0.222 | 319 193 31 325 182 28       | 543 535    | 0.23     | 0.6316597     | 1  | 0.88   | 0.52         | 1.49            |
| PBCS1    | 5    | 0.242 0.213 | 291 185 30 409 234 25       | 506 668    | 3.30     | 0.0692318     | 1  | 0.60   | 0.35         | 1.05            |
| PLCO     | 3    | 0.238 0.215 | 576 334 65 576 336 36       | 975 948    | 7.63     | 0.0057293     | 1  | 0.56   | 0.37         | 0.85            |
| WHI      | 7    | 0.235 0.209 | 1416 854 139 1492 801 101   | 2409 2394  | 5.97     | 0.0145241     | 1  | 0.72   | 0.55         | 0.94            |
| STAGE3   | 2    | 0.240 0.226 | 2918 1789 310 2366 1399 195 | 5017 3960  | 5.67     | 0.0172124     | 1  | 0.80   | 0.66         | 0.96            |
| NHS2     | 6    | 0.234 0.226 | 664 362 77 336 187 32       | 1103 555   | 0.90     | 0.3434484     | 1  | 0.81   | 0.53         | 1.25            |
| NOR      | 7    | 0.257 0.215 | 271 195 30 319 171 25       | 496 515    | 0.71     | 0.3993665     | 1  | 0.79   | 0.46         | 1.37            |
| PBCS2    | 6    | 0.236 0.226 | 1016 637 94 850 514 66      | 1747 1430  | 0.96     | 0.3279764     | 1  | 0.85   | 0.62         | 1.18            |
| USRT     | 16   | 0.243 0.232 | 572 357 62 459 275 43       | 991 777    | 0.24     | 0.625842      | 1  | 0.90   | 0.60         | 1.35            |
| WHS      | 2    | 0.244 0.227 | 395 238 47 402 252 29       | 680 683    | 4.62     | 0.031552      | 1  | 0.60   | 0.37         | 0.96            |
| PBCS 1+2 | 2    | 0.237 0.222 | 1306 819 124 1257 746 92    | 2249 2095  | 2.77     | 0.095955      | 1  | 0.79   | 0.60         | 1.04            |

|            |         |        |          |                     |
|------------|---------|--------|----------|---------------------|
| Locus      | Alleles | Chr    | Location | Neighborhood        |
| rs11249433 | T C     | 1p11.2 |          | 120982136 LOC647121 |

| SUBSET   | Rank | MAF         | Geno Counts                   | Subjects   | score X2 | score p-value | df | hom OR | hom OR 95% ( | hom OR 95% CI_u |
|----------|------|-------------|-------------------------------|------------|----------|---------------|----|--------|--------------|-----------------|
| STAGE1-3 | 2    | 0.393 0.426 | 3826 4800 1637 3102 4520 1713 | 10263 9335 | 20.76    | 5.20E-06      | 1  | 1.19   | 1.10         | 1.28            |
| NHS      | 4    | 0.388 0.440 | 425 541 170 358 563 220       | 1136 1141  | 7.38     | 0.0065804     | 1  | 1.36   | 1.09         | 1.69            |
| STAGE1-2 | 16   | 0.403 0.432 | 1899 2492 874 1732 2693 994   | 5265 5419  | 5.98     | 0.0144613     | 1  | 1.13   | 1.02         | 1.25            |
| STAGE2   | 17   | 0.407 0.430 | 1474 1951 704 1374 2130 774   | 4129 4278  | 1.76     | 0.1844194     | 1  | 1.08   | 0.96         | 1.21            |
| CPSII    | 22   | 0.378 0.417 | 220 235 88 178 267 89         | 543 534    | 0.05     | 0.8242282     | 1  | 1.04   | 0.75         | 1.44            |
| PBCS1    | 15   | 0.387 0.393 | 195 230 81 243 326 100        | 506 669    | 0.45     | 0.5026901     | 1  | 0.89   | 0.65         | 1.24            |
| PLCO     | 22   | 0.420 0.421 | 324 476 169 315 465 165       | 969 945    | 0.00     | 0.9462366     | 1  | 0.99   | 0.78         | 1.26            |
| WHI      | 13   | 0.407 0.444 | 857 1133 411 727 1192 462     | 2401 2381  | 4.35     | 0.0370434     | 1  | 1.17   | 1.01         | 1.35            |
| STAGE3   | 1    | 0.383 0.417 | 1931 2310 763 1370 1827 719   | 5004 3916  | 16.81    | 4.13E-05      | 1  | 1.27   | 1.13         | 1.42            |
| NHS2     | 1    | 0.395 0.446 | 418 522 182 179 251 120       | 1122 550   | 7.83     | 0.0051469     | 1  | 1.44   | 1.11         | 1.87            |
| NOR      | 2    | 0.380 0.408 | 184 242 66 180 244 86         | 492 510    | 2.11     | 0.1465054     | 1  | 1.30   | 0.91         | 1.84            |
| PBCS2    | 1    | 0.362 0.398 | 719 778 240 518 661 231       | 1737 1410  | 4.90     | 0.0267818     | 1  | 1.25   | 1.03         | 1.52            |
| USRT     | 17   | 0.385 0.410 | 387 443 159 271 371 132       | 989 774    | 0.23     | 0.6297417     | 1  | 1.06   | 0.83         | 1.37            |
| WHS      | 1    | 0.419 0.446 | 223 325 116 222 300 150       | 664 672    | 4.98     | 0.0257083     | 1  | 1.36   | 1.04         | 1.78            |
| PBCS 1+2 | 4    | 0.368 0.397 | 910 1006 321 761 987 331      | 2237 2079  | 2.14     | 0.1434298     | 1  | 1.13   | 0.96         | 1.34            |

|           |         |         |          |                 |
|-----------|---------|---------|----------|-----------------|
| Locus     | Alleles | Chr     | Location | Neighborhood    |
| rs7121523 | G A     | 11p15.4 |          | 7556781 PPFIBP2 |

| SUBSET   | Rank | MAF         | Geno Counts                 | Subjects   | score X2 | score p-value | df | hom OR | hom OR 95% ( | hom OR 95% CI_u |
|----------|------|-------------|-----------------------------|------------|----------|---------------|----|--------|--------------|-----------------|
| STAGE1-3 | 3    | 0.158 0.162 | 7275 2815 227 6636 2460 293 | 10317 9389 | 16.27    | 5.48E-05      | 1  | 1.44   | 1.20         | 1.72            |
| NHS      | 5    | 0.158 0.169 | 808 306 28 810 283 52       | 1142 1145  | 7.20     | 0.0072756     | 1  | 1.88   | 1.18         | 3.01            |
| STAGE1-2 | 1    | 0.155 0.163 | 3740 1443 99 3857 1390 191  | 5282 5438  | 27.50    | 1.57E-07      | 1  | 1.91   | 1.49         | 2.45            |
| STAGE2   | 2    | 0.154 0.161 | 2932 1137 71 3047 1107 139  | 4140 4293  | 20.12    | 7.26E-06      | 1  | 1.92   | 1.44         | 2.57            |
| CPSII    | 6    | 0.173 0.177 | 368 161 13 366 147 21       | 542 534    | 2.07     | 0.1504554     | 1  | 1.67   | 0.82         | 3.38            |
| PBCS1    | 3    | 0.138 0.156 | 373 123 8 481 165 22        | 504 668    | 3.59     | 0.058289      | 1  | 2.18   | 0.96         | 4.98            |
| PLCO     | 5    | 0.156 0.166 | 688 270 17 661 259 28       | 975 948    | 2.91     | 0.0878722     | 1  | 1.70   | 0.92         | 3.14            |
| WHI      | 2    | 0.154 0.159 | 1704 664 40 1710 606 77     | 2408 2393  | 12.37    | 0.0004372     | 1  | 1.98   | 1.34         | 2.91            |
| STAGE3   | 19   | 0.162 0.161 | 3535 1372 127 2779 1071 102 | 5034 3952  | 0.06     | 0.8052204     | 1  | 1.03   | 0.79         | 1.35            |

|          |    |             |                         |           |      |           |   |      |      |      |
|----------|----|-------------|-------------------------|-----------|------|-----------|---|------|------|------|
| NHS2     | 11 | 0.167 0.159 | 777 314 30 402 141 19   | 1121 562  | 0.68 | 0.4111839 | 1 | 1.28 | 0.71 | 2.29 |
| NOR      | 21 | 0.172 0.177 | 342 136 17 347 147 17   | 495 511   | 0.02 | 0.8863462 | 1 | 0.95 | 0.48 | 1.89 |
| PBCS2    | 24 | 0.148 0.151 | 1266 440 38 1023 369 31 | 1744 1423 | 0.00 | 0.994883  | 1 | 1.00 | 0.62 | 1.62 |
| USRT     | 18 | 0.177 0.172 | 668 301 25 527 223 21   | 994 771   | 0.09 | 0.7580153 | 1 | 1.10 | 0.61 | 1.98 |
| WHS      | 16 | 0.158 0.160 | 482 181 17 480 191 14   | 680 685   | 0.33 | 0.5670684 | 1 | 0.81 | 0.40 | 1.66 |
| PBCS 1+2 | 9  | 0.146 0.153 | 1639 563 47 1504 533 53 | 2249 2090 | 0.79 | 0.3730131 | 1 | 1.20 | 0.80 | 1.79 |

Locus Alleles Chr Location Neighborhood  
rs998592 G|A 16p13.13 11107179 CLEC16A

| SUBSET   | Rank | MAF         | Geno Counts                   | Subjects   | score X2 | score p-value | df | hom OR | hom OR 95% ( | hom OR 95% CI_u |
|----------|------|-------------|-------------------------------|------------|----------|---------------|----|--------|--------------|-----------------|
| STAGE1-3 | 4    | 0.424 0.413 | 3455 4960 1895 3179 4677 1549 | 10310 9405 | 13.98    | 1.85E-04      | 1  | 0.87   | 0.81         | 0.94            |
| NHS      | 9    | 0.425 0.431 | 405 502 233 349 605 191       | 1140 1145  | 5.40     | 0.0201915     | 1  | 0.78   | 0.63         | 0.96            |
| STAGE1-2 | 6    | 0.436 0.419 | 1716 2524 1043 1778 2767 895  | 5283 5440  | 19.04    | 1.28E-05      | 1  | 0.80   | 0.73         | 0.89            |
| STAGE2   | 7    | 0.440 0.416 | 1311 2022 810 1429 2162 704   | 4143 4295  | 13.51    | 2.37E-04      | 1  | 0.81   | 0.73         | 0.91            |
| CPSII    | 2    | 0.475 0.415 | 158 254 131 184 258 93        | 543 535    | 6.88     | 0.0087376     | 1  | 0.67   | 0.50         | 0.90            |
| PBCS1    | 1    | 0.415 0.369 | 186 220 100 264 316 89        | 506 669    | 7.49     | 0.0062177     | 1  | 0.64   | 0.47         | 0.88            |
| PLCO     | 15   | 0.419 0.411 | 324 485 166 320 476 152       | 975 948    | 0.29     | 0.5886408     | 1  | 0.94   | 0.73         | 1.19            |
| WHI      | 11   | 0.450 0.433 | 729 1192 488 743 1229 422     | 2409 2394  | 5.43     | 0.019818      | 1  | 0.84   | 0.73         | 0.97            |
| STAGE3   | 16   | 0.412 0.406 | 1739 2436 853 1402 1912 654   | 5028 3968  | 0.22     | 0.6353319     | 1  | 0.97   | 0.87         | 1.09            |
| NHS2     | 14   | 0.417 0.427 | 378 542 193 187 267 105       | 1113 559   | 0.52     | 0.4692622     | 1  | 1.10   | 0.85         | 1.43            |
| NOR      | 20   | 0.390 0.400 | 186 231 77 187 245 84         | 494 516    | 0.08     | 0.7712401     | 1  | 1.05   | 0.75         | 1.47            |
| PBCS2    | 20   | 0.400 0.394 | 625 849 274 528 682 223       | 1748 1433  | 0.04     | 0.8390498     | 1  | 0.98   | 0.81         | 1.19            |
| USRT     | 11   | 0.439 0.415 | 313 490 192 268 373 136       | 995 777    | 0.90     | 0.3422177     | 1  | 0.89   | 0.70         | 1.13            |
| WHS      | 12   | 0.412 0.408 | 237 324 117 232 345 106       | 678 683    | 0.75     | 0.3873        | 1  | 0.88   | 0.66         | 1.17            |
| PBCS 1+2 | 3    | 0.403 0.386 | 811 1069 373 791 996 312      | 2253 2099  | 2.37     | 0.1238392     | 1  | 0.88   | 0.74         | 1.04            |

Locus Alleles Chr Location Neighborhood  
rs4415084 C|T 5p12 44698272

| SUBSET   | Rank | MAF         | Geno Counts                   | Subjects   | score X2 | score p-value | df | hom OR | hom OR 95% ( | hom OR 95% CI_u |
|----------|------|-------------|-------------------------------|------------|----------|---------------|----|--------|--------------|-----------------|
| STAGE1-3 | 5    | 0.406 0.429 | 3665 4889 1739 3084 4520 1763 | 10293 9367 | 12.22    | 0.0004718     | 1  | 1.14   | 1.06         | 1.23            |
| NHS      | 18   | 0.392 0.435 | 429 513 186 350 583 203       | 1128 1136  | 0.74     | 0.3894679     | 1  | 1.10   | 0.88         | 1.37            |
| STAGE1-2 | 12   | 0.402 0.427 | 1895 2517 858 1797 2627 1006  | 5270 5430  | 9.88     | 0.0016683     | 1  | 1.16   | 1.05         | 1.28            |
| STAGE2   | 13   | 0.404 0.425 | 1466 2004 672 1447 2044 803   | 4142 4294  | 8.01     | 0.0046631     | 1  | 1.18   | 1.05         | 1.32            |
| CPSII    | 11   | 0.427 0.399 | 178 265 99 193 257 85         | 542 535    | 1.07     | 0.3001011     | 1  | 0.84   | 0.61         | 1.16            |
| PBCS1    | 7    | 0.410 0.460 | 174 249 83 193 337 139        | 506 669    | 3.04     | 0.0812761     | 1  | 1.31   | 0.97         | 1.78            |
| PLCO     | 11   | 0.408 0.422 | 339 475 160 321 454 173       | 974 948    | 0.74     | 0.3911568     | 1  | 1.11   | 0.87         | 1.41            |
| WHI      | 8    | 0.400 0.420 | 866 1158 385 827 1120 446     | 2409 2393  | 5.82     | 0.0158408     | 1  | 1.20   | 1.04         | 1.40            |
| STAGE3   | 4    | 0.412 0.433 | 1770 2375 882 1289 1898 760   | 5027 3947  | 4.69     | 0.0303147     | 1  | 1.13   | 1.01         | 1.26            |
| NHS2     | 4    | 0.402 0.436 | 413 517 193 178 270 107       | 1123 555   | 1.13     | 0.2882982     | 1  | 1.15   | 0.89         | 1.50            |
| NOR      | 5    | 0.438 0.413 | 156 242 95 177 248 88         | 493 513    | 0.81     | 0.3685688     | 1  | 0.86   | 0.63         | 1.19            |
| PBCS2    | 19   | 0.424 0.435 | 593 833 328 457 711 271       | 1754 1439  | 0.05     | 0.8300976     | 1  | 1.02   | 0.85         | 1.22            |
| USRT     | 2    | 0.388 0.445 | 374 467 151 252 358 166       | 992 776    | 10.89    | 0.000969      | 1  | 1.51   | 1.18         | 1.93            |
| WHS      | 11   | 0.411 0.427 | 234 316 115 225 311 128       | 665 664    | 0.89     | 0.3459178     | 1  | 1.14   | 0.87         | 1.51            |
| PBCS 1+2 | 7    | 0.421 0.443 | 767 1079 410 648 1043 407     | 2256 2098  | 1.16     | 0.2810309     | 1  | 1.09   | 0.93         | 1.27            |

Locus Alleles Chr Location Neighborhood  
rs2391406 T|G 13q33.3 106586873

| SUBSET   | Rank | MAF         | Geno Counts                   | Subjects   | score X2 | score p-value | df | hom OR | hom OR 95% ( | hom OR 95% CI_u |
|----------|------|-------------|-------------------------------|------------|----------|---------------|----|--------|--------------|-----------------|
| STAGE1-3 | 6    | 0.371 0.364 | 4130 4683 1470 3746 4431 1190 | 10283 9367 | 10.96    | 0.0009319     | 1  | 0.87   | 0.80         | 0.94            |
| NHS      | 16   | 0.372 0.363 | 452 529 160 460 538 146       | 1141 1144  | 0.82     | 0.3664518     | 1  | 0.89   | 0.70         | 1.14            |
| STAGE1-2 | 5    | 0.375 0.359 | 2110 2378 789 1288 2594 652   | 5277 5434  | 19.61    | 9.48E-06      | 1  | 0.78   | 0.69         | 0.87            |
| STAGE2   | 1    | 0.376 0.358 | 1658 1849 629 1728 2056 506   | 4136 4290  | 20.48    | 6.02E-06      | 1  | 0.75   | 0.66         | 0.85            |
| CPSII    | 1    | 0.371 0.333 | 217 240 79 228 251 51         | 536 530    | 7.05     | 0.0079106     | 1  | 0.60   | 0.41         | 0.88            |
| PBCS1    | 2    | 0.387 0.374 | 195 230 81 242 351 74         | 506 667    | 5.06     | 0.0244718     | 1  | 0.68   | 0.48         | 0.95            |

|          |    |             |                             |           |      |           |   |      |      |      |
|----------|----|-------------|-----------------------------|-----------|------|-----------|---|------|------|------|
| PLCO     | 2  | 0.376 0.350 | 398 416 157 393 445 109     | 971 947   | 8.32 | 0.0039109 | 1 | 0.68 | 0.52 | 0.88 |
| WHI      | 10 | 0.372 0.360 | 971 1084 353 966 1133 295   | 2408 2394 | 5.67 | 0.0172718 | 1 | 0.82 | 0.69 | 0.97 |
| STAGE3   | 24 | 0.366 0.370 | 2020 2309 681 1558 1839 538 | 5010 3935 | 0.00 | 0.9644522 | 1 | 1.00 | 0.89 | 1.13 |
| NHS2     | 7  | 0.341 0.379 | 493 477 140 216 265 80      | 1110 561  | 0.89 | 0.344396  | 1 | 1.15 | 0.86 | 1.55 |
| NOR      | 11 | 0.366 0.372 | 207 214 74 201 245 69       | 495 515   | 0.49 | 0.482694  | 1 | 0.88 | 0.62 | 1.26 |
| PBCS2    | 12 | 0.380 0.382 | 656 853 236 542 686 203     | 1745 1431 | 0.45 | 0.5001274 | 1 | 1.07 | 0.88 | 1.31 |
| USRT     | 19 | 0.359 0.365 | 410 454 130 309 368 99      | 994 776   | 0.07 | 0.7880341 | 1 | 0.96 | 0.73 | 1.28 |
| WHS      | 10 | 0.385 0.344 | 254 311 101 290 275 87      | 666 652   | 0.90 | 0.3437158 | 1 | 0.86 | 0.63 | 1.17 |
| PBCS 1+2 | 14 | 0.381 0.379 | 851 1079 317 784 1035 277   | 2247 2096 | 0.54 | 0.4620792 | 1 | 0.94 | 0.79 | 1.12 |

Locus Alleles Chr Location Neighborhood  
rs7716600 C|A 5p12 44910762

| SUBSET   | Rank | MAF         | Geno Counts                 | Subjects   | score X2 | score p-value | df | hom OR | hom OR 95% CI_l | hom OR 95% CI_u |
|----------|------|-------------|-----------------------------|------------|----------|---------------|----|--------|-----------------|-----------------|
| STAGE1-3 | 7    | 0.221 0.241 | 6270 3545 506 5441 3395 564 | 10321 9400 | 10.94    | 0.0009422     | 1  | 1.23   | 1.09            | 1.40            |
| NHS      | 1    | 0.215 0.249 | 693 402 44 652 415 78       | 1139 1145  | 9.56     | 0.0019888     | 1  | 1.81   | 1.24            | 2.64            |
| STAGE1-2 | 2    | 0.216 0.243 | 3227 1823 226 3147 1934 354 | 5276 5435  | 25.13    | 5.36E-07      | 1  | 1.55   | 1.30            | 1.84            |
| STAGE2   | 3    | 0.216 0.241 | 2534 1421 182 2495 1519 276 | 4137 4290  | 16.32    | 5.35E-05      | 1  | 1.49   | 1.22            | 1.80            |
| CPSII    | 13   | 0.225 0.236 | 325 192 26 315 186 33       | 543 534    | 0.71     | 0.3990705     | 1  | 1.26   | 0.74            | 2.14            |
| PBCS1    | 8    | 0.217 0.263 | 308 173 23 362 256 47       | 504 665    | 2.63     | 0.1047146     | 1  | 1.54   | 0.91            | 2.59            |
| PLCO     | 9    | 0.223 0.238 | 577 359 37 546 353 49       | 973 948    | 1.56     | 0.2116319     | 1  | 1.32   | 0.85            | 2.06            |
| WHI      | 4    | 0.212 0.239 | 1499 797 111 1412 818 163   | 2407 2393  | 10.87    | 0.0009749     | 1  | 1.52   | 1.18            | 1.94            |
| STAGE3   | 13   | 0.226 0.237 | 3043 1724 280 2293 1464 209 | 5047 3966  | 0.29     | 0.5892354     | 1  | 0.95   | 0.79            | 1.14            |
| NHS2     | 8    | 0.229 0.236 | 676 383 66 324 211 27       | 1125 562   | 0.84     | 0.3598579     | 1  | 0.81   | 0.51            | 1.28            |
| NOR      | 6    | 0.246 0.241 | 284 178 33 293 191 28       | 495 512    | 0.79     | 0.3740258     | 1  | 0.79   | 0.47            | 1.33            |
| PBCS2    | 15   | 0.223 0.231 | 1070 586 98 847 518 74      | 1754 1439  | 0.19     | 0.6598775     | 1  | 0.93   | 0.68            | 1.27            |
| USRT     | 3    | 0.216 0.253 | 604 350 39 430 293 49       | 993 772    | 5.47     | 0.0193326     | 1  | 1.67   | 1.08            | 2.58            |
| WHS      | 4    | 0.232 0.230 | 409 227 44 399 251 31       | 680 681    | 2.42     | 0.1199421     | 1  | 0.69   | 0.43            | 1.10            |
| PBCS 1+2 | 19   | 0.221 0.241 | 1378 757 121 1210 771 122   | 2256 2103  | 0.35     | 0.5519819     | 1  | 1.08   | 0.83            | 1.40            |

Locus Alleles Chr Location Neighborhood  
rs17570439 T|C 1p34.2 40096797 TRIT1

| SUBSET   | Rank | MAF         | Geno Counts                 | Subjects   | score X2 | score p-value | df | hom OR | hom OR 95% CI_l | hom OR 95% CI_u |
|----------|------|-------------|-----------------------------|------------|----------|---------------|----|--------|-----------------|-----------------|
| STAGE1-3 | 8    | 0.209 0.226 | 6425 3413 446 5639 3268 487 | 10284 9394 | 8.89     | 0.0028664     | 1  | 1.22   | 1.07            | 1.40            |
| NHS      | 7    | 0.204 0.244 | 719 381 42 654 424 67       | 1142 1145  | 6.65     | 0.0098967     | 1  | 1.68   | 1.13            | 2.49            |
| STAGE1-2 | 8    | 0.208 0.229 | 3286 1798 201 3238 1908 291 | 5285 5437  | 15.00    | 1.07E-04      | 1  | 1.44   | 1.20            | 1.73            |
| STAGE2   | 10   | 0.209 0.225 | 2567 1417 159 2584 1484 224 | 4143 4292  | 9.12     | 0.0025272     | 1  | 1.38   | 1.12            | 1.70            |
| CPSII    | 3    | 0.196 0.218 | 343 187 13 329 179 27       | 543 535    | 5.32     | 0.0211124     | 1  | 2.18   | 1.11            | 4.31            |
| PBCS1    | 9    | 0.210 0.222 | 310 179 17 406 228 34       | 506 668    | 2.03     | 0.1537821     | 1  | 1.55   | 0.85            | 2.82            |
| PLCO     | 19   | 0.220 0.235 | 599 323 53 552 346 50       | 975 948    | 0.04     | 0.838376      | 1  | 0.96   | 0.64            | 1.43            |
| WHI      | 6    | 0.206 0.226 | 1501 825 83 1438 829 125    | 2409 2392  | 9.13     | 0.0025088     | 1  | 1.54   | 1.16            | 2.05            |
| STAGE3   | 20   | 0.211 0.221 | 3139 1616 245 2400 1360 196 | 5000 3956  | 0.03     | 0.8525889     | 1  | 1.02   | 0.84            | 1.24            |
| NHS2     | 21   | 0.208 0.226 | 694 332 60 329 192 28       | 1086 549   | 0.14     | 0.7083227     | 1  | 0.92   | 0.58            | 1.45            |
| NOR      | 14   | 0.210 0.233 | 310 164 22 301 185 27       | 496 513    | 0.42     | 0.5184041     | 1  | 1.21   | 0.68            | 2.16            |
| PBCS2    | 23   | 0.208 0.216 | 1111 557 86 891 478 72      | 1754 1441  | 0.00     | 0.9707075     | 1  | 1.01   | 0.73            | 1.39            |
| USRT     | 8    | 0.218 0.221 | 607 344 45 476 258 43       | 996 777    | 1.22     | 0.2688009     | 1  | 1.28   | 0.83            | 1.96            |
| WHS      | 13   | 0.212 0.221 | 417 219 32 403 247 26       | 668 676    | 0.73     | 0.393952      | 1  | 0.79   | 0.47            | 1.35            |
| PBCS 1+2 | 12   | 0.208 0.218 | 1421 735 103 1298 706 106   | 2259 2110  | 0.57     | 0.4491605     | 1  | 1.11   | 0.84            | 1.47            |

Locus Alleles Chr Location Neighborhood  
rs9491859 C|A 6q22.33 128106056 C6orf190

| SUBSET   | Rank | MAF         | Geno Counts                   | Subjects   | score X2 | score p-value | df | hom OR | hom OR 95% CI_l | hom OR 95% CI_u |
|----------|------|-------------|-------------------------------|------------|----------|---------------|----|--------|-----------------|-----------------|
| STAGE1-3 | 9    | 0.355 0.370 | 4295 4686 1313 3761 4282 1328 | 10294 9371 | 8.42     | 0.0037061     | 1  | 1.13   | 1.04            | 1.23            |
| NHS      | 6    | 0.356 0.381 | 459 552 130 447 523 175       | 1141 1145  | 7.10     | 0.0077119     | 1  | 1.39   | 1.09            | 1.78            |
| STAGE1-2 | 4    | 0.349 0.375 | 2226 2433 625 2178 2443 817   | 5284 5438  | 23.04    | 1.59E-06      | 1  | 1.32   | 1.18            | 1.47            |

|          |    |             |                             |           |       |           |   |      |      |      |
|----------|----|-------------|-----------------------------|-----------|-------|-----------|---|------|------|------|
| STAGE2   | 5  | 0.346 0.373 | 1767 1881 495 1731 1920 642 | 4143 4293 | 16.24 | 5.58E-05  | 1 | 1.30 | 1.14 | 1.47 |
| CPSII    | 12 | 0.350 0.339 | 220 266 57 238 231 66       | 543 535   | 0.77  | 0.3790098 | 1 | 1.19 | 0.81 | 1.73 |
| PBCS1    | 11 | 0.345 0.356 | 216 231 59 287 287 94       | 506 668   | 0.91  | 0.3390756 | 1 | 1.19 | 0.83 | 1.69 |
| PLCO     | 4  | 0.333 0.374 | 437 427 111 378 430 140     | 975 948   | 4.34  | 0.0373105 | 1 | 1.33 | 1.02 | 1.75 |
| WHI      | 5  | 0.351 0.383 | 1018 1093 298 933 1089 371  | 2409 2393 | 9.72  | 0.0018263 | 1 | 1.30 | 1.10 | 1.53 |
| STAGE3   | 8  | 0.362 0.364 | 2070 2257 688 1584 1840 511 | 5015 3935 | 0.98  | 0.3216127 | 1 | 0.94 | 0.83 | 1.06 |
| NHS2     | 24 | 0.368 0.367 | 459 501 163 226 249 79      | 1123 554  | 0.01  | 0.905663  | 1 | 0.98 | 0.73 | 1.31 |
| NOR      | 10 | 0.372 0.371 | 200 212 75 200 232 70       | 487 502   | 0.50  | 0.4800417 | 1 | 0.88 | 0.62 | 1.25 |
| PBCS2    | 11 | 0.349 0.349 | 744 779 218 599 660 169     | 1741 1428 | 0.47  | 0.4915915 | 1 | 0.93 | 0.75 | 1.15 |
| USRT     | 12 | 0.374 0.366 | 391 459 141 311 366 102     | 991 779   | 0.60  | 0.4402164 | 1 | 0.90 | 0.68 | 1.18 |
| WHS      | 23 | 0.363 0.383 | 276 306 91 248 333 91       | 673 672   | 0.00  | 0.9955272 | 1 | 1.00 | 0.73 | 1.37 |
| PBCS 1+2 | 23 | 0.348 0.351 | 959 1006 277 885 946 263    | 2242 2094 | 0.01  | 0.9140517 | 1 | 1.01 | 0.84 | 1.21 |

Locus Alleles Chr Location Neighborhood  
rs2067980 A|G 5p12 45018074

| SUBSET   | Rank | MAF         | Geno Counts                 | Subjects   | score X2 | score p-value | df | hom OR | hom OR 95% CI_l | hom OR 95% CI_u |
|----------|------|-------------|-----------------------------|------------|----------|---------------|----|--------|-----------------|-----------------|
| STAGE1-3 | 10   | 0.159 0.173 | 7305 2730 274 6459 2624 308 | 10309 9391 | 7.34     | 0.0067538     | 1  | 1.26   | 1.07            | 1.49            |
| NHS      | 10   | 0.151 0.178 | 814 311 17 769 342 33       | 1142 1144  | 5.25     | 0.0219795     | 1  | 1.97   | 1.09            | 3.57            |
| STAGE1-2 | 7    | 0.150 0.173 | 3805 1375 105 3737 1522 180 | 5285 5439  | 16.11    | 5.99E-05      | 1  | 1.64   | 1.29            | 2.10            |
| STAGE2   | 9    | 0.150 0.172 | 2991 1064 88 2968 1180 147  | 4143 4295  | 11.30    | 0.0007754     | 1  | 1.58   | 1.21            | 2.07            |
| CPSII    | 14   | 0.159 0.164 | 383 147 13 377 140 18       | 543 535    | 0.64     | 0.4238461     | 1  | 1.35   | 0.65            | 2.79            |
| PBCS1    | 18   | 0.191 0.227 | 335 149 22 400 234 35       | 506 669    | 0.38     | 0.5365601     | 1  | 1.19   | 0.68            | 2.08            |
| PLCO     | 13   | 0.144 0.166 | 714 241 20 658 265 25       | 975 948    | 0.40     | 0.5284579     | 1  | 1.21   | 0.66            | 2.21            |
| WHI      | 3    | 0.143 0.161 | 1761 606 42 1700 616 78     | 2409 2394  | 11.26    | 0.000793      | 1  | 1.90   | 1.30            | 2.77            |
| STAGE3   | 23   | 0.169 0.172 | 3500 1356 169 2722 1105 128 | 5025 3955  | 0.01     | 0.9252375     | 1  | 0.99   | 0.78            | 1.25            |
| NHS2     | 9    | 0.169 0.156 | 777 292 42 394 140 16       | 1111 550   | 0.82     | 0.3640541     | 1  | 0.76   | 0.43            | 1.37            |
| NOR      | 9    | 0.142 0.135 | 364 125 8 382 127 6         | 497 515    | 0.53     | 0.4665535     | 1  | 0.67   | 0.23            | 1.97            |
| PBCS2    | 16   | 0.190 0.192 | 1158 519 73 941 441 55      | 1750 1437  | 0.16     | 0.6878529     | 1  | 0.93   | 0.65            | 1.33            |
| USRT     | 4    | 0.155 0.177 | 713 256 26 530 216 29       | 995 775    | 2.41     | 0.1207454     | 1  | 1.53   | 0.89            | 2.63            |
| WHS      | 18   | 0.152 0.166 | 488 164 20 475 181 22       | 672 678    | 0.08     | 0.7743406     | 1  | 1.09   | 0.59            | 2.03            |
| PBCS 1+2 | 24   | 0.190 0.203 | 1493 667 95 1341 672 90     | 2255 2103  | 0.00     | 0.9652075     | 1  | 1.01   | 0.75            | 1.35            |

Locus Alleles Chr Location Neighborhood  
rs10850145 C|T 12q24.13 112428512

| SUBSET   | Rank | MAF         | Geno Counts                | Subjects   | score X2 | score p-value | df | hom OR | hom OR 95% CI_l | hom OR 95% CI_u |
|----------|------|-------------|----------------------------|------------|----------|---------------|----|--------|-----------------|-----------------|
| STAGE1-3 | 11   | 0.095 0.106 | 8474 1786 86 7536 1776 110 | 10346 9422 | 6.31     | 0.0120009     | 1  | 1.44   | 1.08            | 1.92            |
| NHS      | 3    | 0.086 0.110 | 951 186 5 912 215 18       | 1142 1145  | 7.60     | 0.0058499     | 1  | 3.70   | 1.37            | 10.03           |
| STAGE1-2 | 19   | 0.089 0.107 | 4388 850 47 4340 1031 67   | 5285 5438  | 2.71     | 0.0995977     | 1  | 1.37   | 0.94            | 2.00            |
| STAGE2   | 21   | 0.090 0.106 | 3437 664 42 3428 816 49    | 4143 4293  | 0.19     | 0.6611959     | 1  | 1.10   | 0.72            | 1.67            |
| CPSII    | 15   | 0.099 0.107 | 444 90 9 426 103 6         | 543 535    | 0.62     | 0.4321211     | 1  | 0.66   | 0.23            | 1.88            |
| PBCS1    | 17   | 0.094 0.113 | 417 83 6 523 141 5         | 506 669    | 0.43     | 0.5096629     | 1  | 0.67   | 0.20            | 2.23            |
| PLCO     | 14   | 0.077 0.094 | 832 135 8 775 167 6        | 975 948    | 0.37     | 0.5454454     | 1  | 0.72   | 0.25            | 2.10            |
| WHI      | 19   | 0.094 0.111 | 1982 403 24 1898 459 35    | 2409 2392  | 1.98     | 0.159487      | 1  | 1.45   | 0.86            | 2.46            |
| STAGE3   | 3    | 0.100 0.104 | 4086 937 39 3198 745 43    | 5062 3986  | 4.69     | 0.0302829     | 1  | 1.62   | 1.04            | 2.51            |
| NHS2     | 2    | 0.103 0.105 | 905 207 12 456 92 13       | 1124 561   | 4.01     | 0.0452982     | 1  | 2.20   | 1.00            | 4.86            |
| NOR      | 23   | 0.081 0.090 | 414 80 0 426 82 5          | 494 513    |          |               |    |        |                 |                 |
| PBCS2    | 8    | 0.104 0.108 | 1412 338 15 1152 282 16    | 1765 1450  | 0.88     | 0.3494566     | 1  | 1.40   | 0.69            | 2.86            |
| USRT     | 21   | 0.105 0.106 | 799 184 12 622 146 9       | 995 777    | 0.00     | 0.9516006     | 1  | 0.97   | 0.41            | 2.34            |
| WHS      | 24   | 0.094 0.104 | 556 128 0 542 143 0        | 684 685    | -        |               | 1  | 1.00   | 1.00            | 1.00            |
| PBCS 1+2 | 21   | 0.102 0.110 | 1829 420 21 1673 423 21    | 2270 2117  | 0.08     | 0.7781235     | 1  | 1.09   | 0.59            | 2.01            |

Locus Alleles Chr Location Neighborhood  
rs1274466 T|C 10p11.21 34510210 PARD3

| SUBSET | Rank | MAF | Geno Counts | Subjects | score X2 | score p-value | df | hom OR | hom OR 95% CI_l | hom OR 95% CI_u |
|--------|------|-----|-------------|----------|----------|---------------|----|--------|-----------------|-----------------|
|--------|------|-----|-------------|----------|----------|---------------|----|--------|-----------------|-----------------|

|          |    |             |                               |            |      |           |   |      |      |      |
|----------|----|-------------|-------------------------------|------------|------|-----------|---|------|------|------|
| STAGE1-3 | 12 | 0.448 0.433 | 3162 5069 2091 3036 4591 1771 | 10322 9398 | 6.02 | 0.0141262 | 1 | 0.91 | 0.85 | 0.98 |
| NHS      | 13 | 0.470 0.439 | 312 586 244 357 569 218       | 1142 1144  | 1.77 | 0.183506  | 1 | 0.87 | 0.71 | 1.07 |
| STAGE1-2 | 13 | 0.454 0.430 | 1574 2619 1092 1768 2664 1006 | 5285 5438  | 9.02 | 0.0026688 | 1 | 0.87 | 0.79 | 0.96 |
| STAGE2   | 14 | 0.450 0.427 | 1262 2033 848 1411 2095 788   | 4143 4294  | 6.32 | 0.0119282 | 1 | 0.87 | 0.78 | 0.97 |
| CPSII    | 8  | 0.471 0.436 | 152 271 120 172 259 104       | 543 535    | 1.15 | 0.2828825 | 1 | 0.85 | 0.63 | 1.14 |
| PBCS1    | 6  | 0.483 0.446 | 138 247 121 200 340 128       | 506 668    | 3.10 | 0.078184  | 1 | 0.77 | 0.58 | 1.03 |
| PLCO     | 6  | 0.449 0.419 | 298 478 199 319 464 165       | 975 948    | 2.84 | 0.0922279 | 1 | 0.82 | 0.65 | 1.03 |
| WHI      | 18 | 0.443 0.424 | 755 1175 479 803 1153 438     | 2409 2394  | 1.98 | 0.1594722 | 1 | 0.90 | 0.78 | 1.04 |
| STAGE3   | 15 | 0.442 0.437 | 1588 2454 1000 1269 1929 767  | 5042 3965  | 0.26 | 0.6107471 | 1 | 0.97 | 0.88 | 1.08 |
| NHS2     | 15 | 0.440 0.436 | 363 535 227 175 278 104       | 1125 557   | 0.52 | 0.4702881 | 1 | 0.91 | 0.70 | 1.18 |
| NOR      | 16 | 0.391 0.401 | 184 235 76 188 240 86         | 495 514    | 0.34 | 0.5573645 | 1 | 1.11 | 0.79 | 1.55 |
| PBCS2    | 9  | 0.457 0.441 | 518 863 368 456 695 287       | 1749 1438  | 0.69 | 0.4056927 | 1 | 0.93 | 0.78 | 1.11 |
| USRT     | 15 | 0.454 0.444 | 295 489 205 243 378 156       | 989 777    | 0.27 | 0.6023517 | 1 | 0.94 | 0.74 | 1.19 |
| WHS      | 14 | 0.424 0.446 | 228 332 124 207 338 134       | 684 679    | 0.55 | 0.4563198 | 1 | 1.11 | 0.84 | 1.46 |
| PBCS 1+2 | 1  | 0.463 0.442 | 656 1106 488 655 1033 413     | 2250 2101  | 3.19 | 0.0742003 | 1 | 0.87 | 0.75 | 1.01 |

Locus Alleles Chr Location Neighborhood  
rs3817198 T|C 11p15.5 1865582 LSP1

| SUBSET   | Rank | MAF         | Geno Counts                   | Subjects   | score X2 | score p-value | df | hom OR | hom OR 95% ( | hom OR 95% CI_u |
|----------|------|-------------|-------------------------------|------------|----------|---------------|----|--------|--------------|-----------------|
| STAGE1-3 | 13   | 0.322 0.332 | 4732 4516 1068 4222 4118 1068 | 10316 9408 | 4.96     | 0.0259078     | 1  | 1.11   | 1.01         | 1.21            |
| NHS      | 15   | 0.318 0.330 | 524 510 108 514 505 125       | 1142 1144  | 1.23     | 0.2682136     | 1  | 1.17   | 0.89         | 1.53            |
| STAGE1-2 | 18   | 0.325 0.341 | 2407 2312 562 2371 2415 643   | 5281 5429  | 3.34     | 0.0675968     | 1  | 1.12   | 0.99         | 1.26            |
| STAGE2   | 16   | 0.327 0.344 | 1883 1802 454 1857 1910 518   | 4139 4285  | 2.22     | 0.1362461     | 1  | 1.11   | 0.97         | 1.27            |
| CPSII    | 18   | 0.334 0.345 | 243 231 64 235 227 70         | 538 532    | 0.44     | 0.5079772     | 1  | 1.13   | 0.78         | 1.64            |
| PBCS1    | 14   | 0.319 0.333 | 229 228 47 292 299 71         | 504 662    | 0.55     | 0.4575176     | 1  | 1.16   | 0.78         | 1.72            |
| PLCO     | 7    | 0.335 0.344 | 440 417 118 397 449 101       | 975 947    | 2.09     | 0.1483077     | 1  | 0.81   | 0.61         | 1.08            |
| WHI      | 12   | 0.326 0.346 | 1097 1051 260 1047 1038 309   | 2408 2394  | 5.28     | 0.0215968     | 1  | 1.23   | 1.03         | 1.47            |
| STAGE3   | 7    | 0.319 0.322 | 2324 2205 506 1845 1706 426   | 5035 3977  | 1.36     | 0.2430578     | 1  | 1.09   | 0.95         | 1.25            |
| NHS2     | 18   | 0.317 0.311 | 518 491 109 277 232 61        | 1118 570   | 0.38     | 0.5394847     | 1  | 1.11   | 0.80         | 1.54            |
| NOR      | 4    | 0.262 0.290 | 269 194 33 258 215 42         | 496 515    | 0.84     | 0.3608204     | 1  | 1.25   | 0.78         | 2.00            |
| PBCS2    | 5    | 0.330 0.339 | 789 789 189 634 637 171       | 1767 1442  | 1.08     | 0.2986083     | 1  | 1.12   | 0.90         | 1.40            |
| USRT     | 9    | 0.338 0.317 | 442 434 119 366 331 81        | 995 778    | 1.22     | 0.2697906     | 1  | 0.84   | 0.62         | 1.14            |
| WHS      | 5    | 0.310 0.322 | 306 297 56 310 291 71         | 659 672    | 1.65     | 0.1994188     | 1  | 1.27   | 0.88         | 1.84            |
| PBCS 1+2 | 6    | 0.328 0.336 | 1019 1016 236 932 933 241     | 2271 2106  | 1.42     | 0.2335519     | 1  | 1.12   | 0.93         | 1.36            |

Locus Alleles Chr Location Neighborhood  
rs3134615 G|T 1p34.2 40134653 TRIT1,MYCL1

| SUBSET   | Rank | MAF         | Geno Counts                 | Subjects   | score X2 | score p-value | df | hom OR | hom OR 95% ( | hom OR 95% CI_u |
|----------|------|-------------|-----------------------------|------------|----------|---------------|----|--------|--------------|-----------------|
| STAGE1-3 | 14   | 0.228 0.246 | 6153 3643 540 5335 3514 552 | 10336 9401 | 4.59     | 0.0321134     | 1  | 1.14   | 1.01         | 1.29            |
| NHS      | 8    | 0.220 0.263 | 690 402 50 617 454 74       | 1142 1145  | 5.58     | 0.0181904     | 1  | 1.56   | 1.08         | 2.25            |
| STAGE1-2 | 15   | 0.228 0.250 | 3134 1895 256 3048 2068 324 | 5285 5440  | 6.73     | 0.0094921     | 1  | 1.25   | 1.06         | 1.48            |
| STAGE2   | 15   | 0.230 0.246 | 2444 1493 206 2431 1614 250 | 4143 4295  | 2.84     | 0.0916681     | 1  | 1.18   | 0.97         | 1.43            |
| CPSII    | 4    | 0.215 0.236 | 326 200 17 313 192 30       | 543 535    | 4.10     | 0.0428658     | 1  | 1.87   | 1.01         | 3.44            |
| PBCS1    | 12   | 0.226 0.238 | 299 185 22 387 245 37       | 506 669    | 0.74     | 0.3881004     | 1  | 1.27   | 0.73         | 2.21            |
| PLCO     | 16   | 0.236 0.258 | 578 334 63 516 375 57       | 975 948    | 0.27     | 0.6028112     | 1  | 0.91   | 0.62         | 1.32            |
| WHI      | 16   | 0.229 0.248 | 1421 875 113 1349 904 141   | 2409 2394  | 3.42     | 0.0644162     | 1  | 1.27   | 0.99         | 1.64            |
| STAGE3   | 17   | 0.229 0.240 | 3019 1748 284 2287 1449 229 | 5051 3965  | 0.11     | 0.7457737     | 1  | 1.03   | 0.86         | 1.23            |
| NHS2     | 17   | 0.228 0.233 | 687 372 72 328 198 31       | 1131 557   | 0.42     | 0.5146119     | 1  | 0.87   | 0.56         | 1.34            |
| NOR      | 17   | 0.232 0.253 | 292 179 26 284 200 30       | 497 514    | 0.19     | 0.662648      | 1  | 1.13   | 0.66         | 1.94            |
| PBCS2    | 17   | 0.226 0.231 | 1063 591 102 854 504 81     | 1756 1439  | 0.11     | 0.7348676     | 1  | 0.95   | 0.70         | 1.28            |
| USRT     | 7    | 0.240 0.246 | 567 373 51 445 276 52       | 991 773    | 1.80     | 0.1800643     | 1  | 1.31   | 0.88         | 1.96            |
| WHS      | 20   | 0.221 0.250 | 410 233 33 376 271 35       | 676 682    | 0.04     | 0.8381202     | 1  | 1.05   | 0.65         | 1.72            |
| PBCS 1+2 | 22   | 0.226 0.233 | 1362 776 124 1241 746 117   | 2262 2104  | 0.03     | 0.8689584     | 1  | 1.02   | 0.79         | 1.33            |

Locus Alleles Chr Location Neighborhood

| rs12608723 | A G     | 19q13.11    | 38508973                      |              |          |               |    |        |               |                 |
|------------|---------|-------------|-------------------------------|--------------|----------|---------------|----|--------|---------------|-----------------|
| SUBSET     | Rank    | MAF         | Geno Counts                   | Subjects     | score X2 | score p-value | df | hom OR | hom OR 95% CI | hom OR 95% CI_u |
| STAGE1-3   | 15      | 0.136 0.128 | 7735 2378 2177 1555 2085 163  | 10330 9403   | 3.72     | 0.0536754     | 1  | 0.82   | 0.66          | 1.00            |
| NHS        | 11      | 0.153 0.123 | 819 296 27 877 252 15         | 1142 1144    | 3.97     | 0.0464475     | 1  | 0.53   | 0.28          | 1.00            |
| STAGE1-2   | 17      | 0.143 0.126 | 3888 1281 116 4158 1190 91    | 5285 5439    | 4.15     | 0.0415757     | 1  | 0.76   | 0.58          | 1.00            |
| STAGE2     | 18      | 0.140 0.127 | 3069 985 89 3281 938 76       | 4143 4295    | 1.38     | 0.2397158     | 1  | 0.83   | 0.61          | 1.13            |
| CPSII      | 16      | 0.140 0.120 | 398 138 7 417 108 10          | 543 535      | 0.61     | 0.4339525     | 1  | 1.48   | 0.55          | 3.93            |
| PBCS1      | 19      | 0.153 0.129 | 364 129 13 510 146 13         | 506 669      | 0.34     | 0.557087      | 1  | 0.79   | 0.36          | 1.74            |
| PLCO       | 23      | 0.132 0.124 | 738 216 21 732 196 20         | 975 948      | 0.00     | 0.9483054     | 1  | 1.02   | 0.55          | 1.91            |
| WHI        | 15      | 0.141 0.128 | 1783 572 54 1818 540 36       | 2409 2394    | 3.58     | 0.0586298     | 1  | 0.66   | 0.43          | 1.02            |
| STAGE3     | 11      | 0.129 0.132 | 3849 1100 101 2997 901 72     | 5050 3970    | 0.48     | 0.4881134     | 1  | 0.90   | 0.66          | 1.22            |
| NHS2       | 19      | 0.126 0.123 | 869 243 21 433 113 12         | 1133 558     | 0.18     | 0.6715833     | 1  | 1.17   | 0.57          | 2.39            |
| NOR        | 22      | 0.128 0.167 | 380 103 12 356 148 12         | 495 516      | 0.00     | 0.9980263     | 1  | 1.00   | 0.44          | 2.25            |
| PBCS2      | 7       | 0.124 0.118 | 1344 368 32 1120 300 20       | 1744 1440    | 0.88     | 0.3469728     | 1  | 0.76   | 0.43          | 1.34            |
| USRT       | 20      | 0.138 0.142 | 736 239 17 573 191 15         | 992 779      | 0.06     | 0.8138278     | 1  | 1.09   | 0.54          | 2.21            |
| WHS        | 9       | 0.135 0.129 | 520 147 19 515 149 13         | 686 677      | 1.07     | 0.3009686     | 1  | 0.69   | 0.34          | 1.40            |
| PBCS 1+2   | 5       | 0.130 0.120 | 1706 494 45 1630 440 33       | 2245 2103    | 1.55     | 0.2129891     | 1  | 0.75   | 0.47          | 1.18            |
| Locus      | Alleles | Chr         | Location                      | Neighborhood |          |               |    |        |               |                 |
| rs724244   | C T     | 3p24.1      |                               | 27217157     | NEK10    |               |    |        |               |                 |
| SUBSET     | Rank    | MAF         | Geno Counts                   | Subjects     | score X2 | score p-value | df | hom OR | hom OR 95% CI | hom OR 95% CI_u |
| STAGE1-3   | 16      | 0.261 0.275 | 5011 3522 635 4351 3283 626   | 9168 8260    | 3.64     | 0.0564546     | 1  | 1.12   | 1.00          | 1.26            |
| STAGE1-2   | 10      | 0.252 0.281 | 2304 1588 250 2220 1730 341   | 4142 4291    | 11.92    | 0.0005565     | 1  | 1.34   | 1.13          | 1.59            |
| STAGE2     | 8       | 0.252 0.281 | 2304 1588 250 2220 1730 341   | 4142 4291    | 11.55    | 0.0006791     | 1  | 1.34   | 1.13          | 1.59            |
| CPSII      | 10      | 0.247 0.273 | 309 198 35 287 202 45         | 542 534      | 1.08     | 0.299804      | 1  | 1.28   | 0.80          | 2.03            |
| PBCS1      | 16      | 0.246 0.265 | 293 177 36 368 245 54         | 506 667      | 0.44     | 0.5054535     | 1  | 1.16   | 0.74          | 1.82            |
| PLCO       | 1       | 0.230 0.291 | 569 364 42 481 381 85         | 975 947      | 16.03    | 6.25E-05      | 1  | 2.17   | 1.47          | 3.19            |
| WHI        | 20      | 0.263 0.283 | 1302 949 158 1217 998 179     | 2409 2394    | 1.52     | 0.2179869     | 1  | 1.15   | 0.92          | 1.44            |
| STAGE3     | 12      | 0.269 0.267 | 2707 1938 385 2132 1554 285   | 5030 3971    | 0.39     | 0.5331514     | 1  | 0.95   | 0.81          | 1.12            |
| NHS2       | 23      | 0.269 0.281 | 611 397 100 293 218 48        | 1108 559     | 0.09     | 0.7677601     | 1  | 0.95   | 0.66          | 1.36            |
| NOR        | 12      | 0.248 0.264 | 276 192 27 278 204 34         | 495 516      | 0.49     | 0.4837855     | 1  | 1.20   | 0.71          | 2.03            |
| PBCS2      | 4       | 0.273 0.261 | 926 696 131 778 567 92        | 1753 1437    | 1.42     | 0.2336174     | 1  | 0.85   | 0.64          | 1.12            |
| USRT       | 23      | 0.273 0.267 | 524 397 73 418 302 56         | 994 776      | 0.00     | 0.9814563     | 1  | 1.00   | 0.69          | 1.43            |
| WHS        | 22      | 0.268 0.273 | 370 256 54 365 263 55         | 680 683      | 0.01     | 0.9433545     | 1  | 1.01   | 0.69          | 1.50            |
| PBCS 1+2   | 17      | 0.267 0.262 | 1219 869 167 1145 811 146     | 2255 2102    | 0.46     | 0.4973663     | 1  | 0.92   | 0.73          | 1.16            |
| Locus      | Alleles | Chr         | Location                      | Neighborhood |          |               |    |        |               |                 |
| rs37936    | A G     | 7q21.11     |                               | 79806994     |          |               |    |        |               |                 |
| SUBSET     | Rank    | MAF         | Geno Counts                   | Subjects     | score X2 | score p-value | df | hom OR | hom OR 95% CI | hom OR 95% CI_u |
| STAGE1-3   | 17      | 0.384 0.371 | 3916 4697 1559 3704 4197 1330 | 10172 9231   | 3.63     | 0.056802      | 1  | 0.93   | 0.85          | 1.00            |
| NHS        | 19      | 0.400 0.365 | 403 541 178 474 476 171       | 1122 1121    | 0.26     | 0.6089729     | 1  | 0.94   | 0.75          | 1.19            |
| STAGE1-2   | 9       | 0.400 0.368 | 1731 2149 797 1897 2074 674   | 4677 4645    | 12.17    | 0.0004854     | 1  | 0.82   | 0.73          | 0.92            |
| STAGE2     | 6       | 0.400 0.369 | 1328 1608 619 1423 1598 503   | 3555 3524    | 13.71    | 2.14E-04      | 1  | 0.78   | 0.69          | 0.89            |
| CPSII      | 20      | 0.387 0.373 | 199 251 79 202 249 70         | 529 521      | 0.38     | 0.5366369     | 1  | 0.90   | 0.63          | 1.27            |
| PLCO       | 18      | 0.378 0.376 | 379 431 146 373 394 147       | 956 914      | 0.12     | 0.7277725     | 1  | 1.05   | 0.81          | 1.35            |
| WHI        | 1       | 0.409 0.368 | 857 1064 430 933 1084 316     | 2351 2333    | 20.01    | 7.71E-06      | 1  | 0.70   | 0.60          | 0.82            |
| STAGE3     | 10      | 0.371 0.377 | 1992 2333 700 1552 1840 573   | 5025 3965    | 0.59     | 0.442805      | 1  | 1.05   | 0.93          | 1.18            |
| NHS2       | 3       | 0.366 0.398 | 457 508 157 212 261 96        | 1122 569     | 2.45     | 0.1171765     | 1  | 1.25   | 0.95          | 1.65            |
| NOR        | 8       | 0.364 0.345 | 202 227 67 221 233 61         | 496 515      | 0.69     | 0.4062247     | 1  | 0.85   | 0.59          | 1.24            |
| PBCS2      | 2       | 0.368 0.364 | 706 782 248 568 669 183       | 1736 1420    | 1.76     | 0.1845904     | 1  | 0.87   | 0.71          | 1.07            |
| USRT       | 6       | 0.393 0.403 | 356 496 143 283 364 132       | 995 779      | 2.01     | 0.1565594     | 1  | 1.21   | 0.93          | 1.56            |
| WHS        | 6       | 0.362 0.378 | 271 320 85 268 313 101        | 676 682      | 1.41     | 0.2348941     | 1  | 1.21   | 0.88          | 1.65            |
| PBCS 1+2   | 8       | 0.367 0.364 | 899 997 310 823 952 266       | 2206 2041    | 1.09     | 0.2958707     | 1  | 0.91   | 0.76          | 1.09            |

| Locus     | Alleles | Chr         | Location                      | Neighborhood |          |               |    |        |               |                 |
|-----------|---------|-------------|-------------------------------|--------------|----------|---------------|----|--------|---------------|-----------------|
| rs4666451 | G A     | 2p24.1      |                               | 19150424     |          |               |    |        |               |                 |
| SUBSET    | Rank    | MAF         | Geno Counts                   | Subjects     | score X2 | score p-value | df | hom OR | hom OR 95% CI | hom OR 95% CI_u |
| STAGE1-3  | 18      | 0.391 0.382 | 3412 4325 1424 3148 3915 1197 | 9161 8260    | 3.49     | 0.0616468     | 1  | 0.92   | 0.85          | 1.00            |
| STAGE1-2  | 14      | 0.398 0.376 | 1509 1968 666 1657 2045 593   | 4143 4295    | 8.56     | 0.0034393     | 1  | 0.84   | 0.74          | 0.94            |
| STAGE2    | 11      | 0.398 0.376 | 1509 1968 666 1657 2045 593   | 4143 4295    | 8.53     | 0.0034891     | 1  | 0.84   | 0.74          | 0.94            |
| CPSII     | 7       | 0.394 0.400 | 201 256 86 177 288 70         | 543 535      | 1.86     | 0.1720731     | 1  | 0.79   | 0.56          | 1.11            |
| PBCS1     | 13      | 0.409 0.380 | 176 246 84 257 316 96         | 506 669      | 0.72     | 0.3977717     | 1  | 0.87   | 0.63          | 1.20            |
| PLCO      | 10      | 0.393 0.373 | 355 474 146 363 462 123       | 975 948      | 1.53     | 0.2168576     | 1  | 0.85   | 0.65          | 1.10            |
| WHI       | 14      | 0.397 0.372 | 890 1125 394 950 1105 339     | 2409 2394    | 4.29     | 0.0384419     | 1  | 0.85   | 0.72          | 0.99            |
| STAGE3    | 21      | 0.386 0.388 | 1905 2358 758 1491 1874 604   | 5021 3969    | 0.03     | 0.8623217     | 1  | 1.01   | 0.90          | 1.14            |
| NHS2      | 22      | 0.382 0.384 | 428 504 169 211 263 82        | 1101 556     | 0.10     | 0.7498255     | 1  | 0.95   | 0.72          | 1.27            |
| NOR       | 18      | 0.363 0.355 | 201 230 65 214 238 64         | 496 516      | 0.18     | 0.6744368     | 1  | 0.92   | 0.64          | 1.34            |
| PBCS2     | 3       | 0.399 0.411 | 621 858 268 504 692 247       | 1747 1443    | 1.70     | 0.1922815     | 1  | 1.13   | 0.94          | 1.37            |
| USRT      | 10      | 0.382 0.370 | 389 452 154 309 358 108       | 995 775      | 1.17     | 0.2787719     | 1  | 0.86   | 0.66          | 1.13            |
| WHS       | 21      | 0.380 0.390 | 266 314 102 253 323 103       | 682 679      | 0.01     | 0.9150459     | 1  | 1.02   | 0.75          | 1.37            |
| PBCS 1+2  | 18      | 0.402 0.401 | 795 1103 352 761 1004 343     | 2250 2108    | 0.44     | 0.5071048     | 1  | 1.06   | 0.90          | 1.24            |

| Locus      | Alleles | Chr         | Location                    | Neighborhood |          |               |    |        |               |                 |
|------------|---------|-------------|-----------------------------|--------------|----------|---------------|----|--------|---------------|-----------------|
| rs10941679 | A G     | 5p12        |                             | 44742255     |          |               |    |        |               |                 |
| SUBSET     | Rank    | MAF         | Geno Counts                 | Subjects     | score X2 | score p-value | df | hom OR | hom OR 95% CI | hom OR 95% CI_u |
| STAGE1-3   | 19      | 0.259 0.280 | 3015 2105 370 2365 1859 351 | 5490 4575    | 3.06     | 0.0804523     | 1  | 1.15   | 0.98          | 1.34            |
| STAGE3     | 6       | 0.259 0.278 | 2759 1911 343 2048 1601 295 | 5013 3944    | 1.48     | 0.2238961     | 1  | 1.11   | 0.94          | 1.30            |
| NHS2       | 5       | 0.256 0.280 | 607 415 73 286 220 44       | 1095 550     | 0.98     | 0.3220527     | 1  | 1.22   | 0.82          | 1.80            |
| NOR        | 13      | 0.303 0.282 | 239 213 44 265 210 40       | 496 515      | 0.48     | 0.4881904     | 1  | 0.85   | 0.54          | 1.34            |
| PBCS2      | 21      | 0.259 0.276 | 969 667 121 737 605 94      | 1757 1436    | 0.03     | 0.8581738     | 1  | 0.97   | 0.74          | 1.29            |
| USRT       | 1       | 0.236 0.290 | 575 373 49 395 307 71       | 997 773      | 12.82    | 0.0003436     | 1  | 1.98   | 1.35          | 2.89            |
| WHS        | 8       | 0.266 0.262 | 369 243 56 365 259 46       | 668 670      | 1.10     | 0.2938582     | 1  | 0.80   | 0.54          | 1.21            |
| PBCS 1+2   | 11      | 0.259 0.281 | 1225 861 148 1054 863 150   | 2234 2067    | 0.62     | 0.4318533     | 1  | 1.10   | 0.87          | 1.39            |

| Locus      | Alleles | Chr         | Location                    | Neighborhood |          |               |    |        |               |                 |  |
|------------|---------|-------------|-----------------------------|--------------|----------|---------------|----|--------|---------------|-----------------|--|
| rs17740709 | A G     | 12q21.31    |                             | 81947471     | TMTC2    |               |    |        |               |                 |  |
| SUBSET     | Rank    | MAF         | Geno Counts                 | Subjects     | score X2 | score p-value | df | hom OR | hom OR 95% CI | hom OR 95% CI_u |  |
| STAGE1-3   | 20      | 0.220 0.215 | 6248 3554 485 5841 3051 491 | 10287 9383   | 2.92     | 0.0873265     | 1  | 1.12   | 0.98          | 1.27            |  |
| NHS        | 12      | 0.218 0.212 | 692 402 48 725 355 65       | 1142 1145    | 3.03     | 0.0817077     | 1  | 1.40   | 0.96          | 2.06            |  |
| STAGE1-2   | 11      | 0.218 0.214 | 3201 1869 215 3403 1742 295 | 5285 5440    | 11.20    | 0.0008181     | 1  | 1.36   | 1.14          | 1.63            |  |
| STAGE2     | 12      | 0.217 0.215 | 2509 1467 167 2678 1387 230 | 4143 4295    | 8.19     | 0.0042098     | 1  | 1.35   | 1.10          | 1.65            |  |
| CPSII      | 17      | 0.215 0.200 | 328 197 18 343 170 22       | 543 535      | 0.50     | 0.4794669     | 1  | 1.26   | 0.66          | 2.40            |  |
| PBCS1      | 4       | 0.242 0.247 | 282 203 21 383 241 45       | 506 669      | 3.57     | 0.0586981     | 1  | 1.67   | 0.98          | 2.87            |  |
| PLCO       | 20      | 0.214 0.203 | 603 326 46 610 291 47       | 975 948      | 0.02     | 0.9010814     | 1  | 1.03   | 0.67          | 1.57            |  |
| WHI        | 9       | 0.215 0.212 | 1466 851 92 1504 764 126    | 2409 2394    | 5.72     | 0.0167588     | 1  | 1.40   | 1.06          | 1.84            |  |
| STAGE3     | 9       | 0.222 0.216 | 3047 1686 270 2439 1311 196 | 5003 3946    | 0.86     | 0.3539935     | 1  | 0.91   | 0.76          | 1.11            |  |
| NHS2       | 12      | 0.210 0.209 | 694 349 56 342 183 23       | 1099 548     | 0.65     | 0.4204136     | 1  | 0.82   | 0.50          | 1.34            |  |
| NOR        | 19      | 0.243 0.205 | 281 187 27 328 161 25       | 495 514      | 0.17     | 0.6807346     | 1  | 0.89   | 0.51          | 1.56            |  |
| PBCS2      | 22      | 0.234 0.240 | 1042 597 112 836 508 91     | 1751 1435    | 0.01     | 0.9422687     | 1  | 1.01   | 0.76          | 1.35            |  |
| USRT       | 14      | 0.212 0.195 | 612 339 41 501 250 27       | 992 778      | 0.34     | 0.5584656     | 1  | 0.86   | 0.52          | 1.42            |  |
| WHS        | 17      | 0.212 0.200 | 418 214 34 432 209 30       | 666 671      | 0.30     | 0.5832056     | 1  | 0.87   | 0.53          | 1.44            |  |
| PBCS 1+2   | 10      | 0.236 0.243 | 1324 799 133 1218 747 136   | 2256 2101    | 0.76     | 0.3848307     | 1  | 1.12   | 0.87          | 1.43            |  |

| Locus     | Alleles | Chr         | Location                | Neighborhood |          |               |    |        |               |                 |  |
|-----------|---------|-------------|-------------------------|--------------|----------|---------------|----|--------|---------------|-----------------|--|
| rs2303659 | G A     | 11q24.3     |                         | 129326474    | PRDM10   |               |    |        |               |                 |  |
| SUBSET    | Rank    | MAF         | Geno Counts             | Subjects     | score X2 | score p-value | df | hom OR | hom OR 95% CI | hom OR 95% CI_u |  |
| STAGE1-3  | 21      | 0.035 0.028 | 9603 693 10 8879 500 14 | 10306 9393   | 2.05     | 0.1526033     | 1  | 1.81   | 0.79          | 4.15            |  |



|          |    |             |                        |           |      |           |   |      |      |       |
|----------|----|-------------|------------------------|-----------|------|-----------|---|------|------|-------|
| NHS      | 22 | 0.034 0.024 | 1064 78 0 1089 56 0    | 1142 1145 | -    | 1         | 1 | 1.00 | 1.00 | 1.00  |
| STAGE1-2 | 21 | 0.034 0.025 | 4927 356 2 5166 271 3  | 5285 5440 | 0.08 | 0.7837882 | 1 | 1.29 | 0.21 | 7.80  |
| STAGE2   | 22 | 0.034 0.026 | 3863 278 2 4077 215 3  | 4143 4295 | 0.07 | 0.7847462 | 1 | 1.28 | 0.21 | 7.79  |
| CPSII    | 24 | 0.030 0.017 | 510 33 0 518 16 1      | 543 535   |      |           |   |      |      |       |
| PBCS1    | 22 | 0.033 0.022 | 473 33 0 640 29 0      | 506 669   | -    | 1         | 1 | 1.00 | 1.00 | 1.00  |
| PLCO     | 17 | 0.036 0.028 | 906 68 1 895 52 1      | 975 948   | 0.14 | 0.7119662 | 1 | 0.59 | 0.03 | 10.25 |
| WHI      | 23 | 0.034 0.026 | 2245 163 1 2269 124 1  | 2409 2394 | -    | 0.9982998 | 1 | 1.00 | 0.06 | 16.06 |
| STAGE3   | 5  | 0.035 0.032 | 4676 337 8 3714 229 11 | 5021 3954 | 2.24 | 0.1343277 | 1 | 2.00 | 0.79 | 5.05  |
| NHS2     | 16 | 0.039 0.025 | 1029 77 5 534 20 4     | 1111 558  | 0.51 | 0.4764601 | 1 | 1.61 | 0.43 | 6.02  |
| NOR      | 24 | 0.036 0.043 | 460 36 0 472 44 0      | 496 516   | -    | 1         | 1 | 1.00 | 1.00 | 1.00  |
| PBCS2    | 10 | 0.032 0.030 | 1648 112 1 1358 83 2   | 1761 1443 | 0.61 | 0.4350192 | 1 | 2.53 | 0.23 | 28.17 |
| USRT     | 24 | 0.037 0.035 | 920 74 0 723 54 0      | 994 777   | -    | 1         | 1 | 1.00 | 1.00 | 1.00  |
| WHS      | 7  | 0.032 0.029 | 619 38 2 627 28 5      | 659 660   | 1.25 | 0.2630372 | 1 | 2.48 | 0.48 | 12.88 |
| PBCS 1+2 | 13 | 0.032 0.027 | 2121 145 1 1997 112 2  | 2267 2111 | 0.55 | 0.4566182 | 1 | 2.42 | 0.22 | 26.81 |

Locus Alleles Chr Location Neighborhood  
rs11077820 T|C 17q25.1 71966263 UBE2O, AANAT

| SUBSET   | Rank | MAF         | Geno Counts                   | Subjects   | score X2 | score p-value | df | hom OR | hom OR 95% CI | hom OR 95% CI_u |
|----------|------|-------------|-------------------------------|------------|----------|---------------|----|--------|---------------|-----------------|
| STAGE1-3 | 22   | 0.371 0.365 | 4056 4814 1411 3845 4226 1308 | 10281 9379 | 0.18     | 0.6720734     | 1  | 1.02   | 0.94          | 1.10            |
| NHS      | 17   | 0.382 0.370 | 429 553 160 475 492 178       | 1142 1145  | 0.77     | 0.3810732     | 1  | 1.11   | 0.88          | 1.40            |
| STAGE1-2 | 20   | 0.383 0.367 | 1953 2611 715 2229 2429 778   | 5279 5436  | 0.95     | 0.3286054     | 1  | 1.06   | 0.95          | 1.18            |
| STAGE2   | 19   | 0.383 0.366 | 1524 2058 555 1754 1937 600   | 4137 4291  | 0.41     | 0.5229974     | 1  | 1.04   | 0.92          | 1.18            |
| CPSII    | 9    | 0.377 0.374 | 216 242 83 205 260 70         | 541 535    | 1.14     | 0.2860925     | 1  | 0.83   | 0.59          | 1.17            |
| PBCS1    | 21   | 0.375 0.353 | 193 244 67 284 298 87         | 504 669    | 0.02     | 0.8854299     | 1  | 0.97   | 0.69          | 1.38            |
| PLCO     | 21   | 0.371 0.355 | 371 484 120 395 430 121       | 975 946    | 0.01     | 0.905996      | 1  | 1.02   | 0.77          | 1.34            |
| WHI      | 17   | 0.385 0.374 | 871 1215 320 962 1071 359     | 2406 2392  | 2.72     | 0.0988169     | 1  | 1.15   | 0.97          | 1.35            |
| STAGE3   | 14   | 0.359 0.362 | 2103 2202 697 1617 1799 530   | 5002 3946  | 0.27     | 0.6011372     | 1  | 0.97   | 0.86          | 1.09            |
| NHS2     | 20   | 0.364 0.374 | 446 495 150 219 253 80        | 1091 552   | 0.17     | 0.6759962     | 1  | 1.06   | 0.79          | 1.43            |
| NOR      | 3    | 0.329 0.316 | 225 216 55 233 237 44         | 496 514    | 1.79     | 0.1804242     | 1  | 0.75   | 0.49          | 1.14            |
| PBCS2    | 14   | 0.359 0.375 | 732 784 238 563 671 204       | 1754 1438  | 0.31     | 0.5800375     | 1  | 1.06   | 0.86          | 1.30            |
| USRT     | 22   | 0.371 0.380 | 405 441 148 303 353 118       | 994 774    | 0.00     | 0.9573176     | 1  | 1.01   | 0.77          | 1.31            |
| WHS      | 3    | 0.358 0.339 | 295 266 106 299 285 84        | 667 668    | 3.04     | 0.0812051     | 1  | 0.76   | 0.56          | 1.04            |
| PBCS 1+2 | 20   | 0.362 0.368 | 925 1029 304 846 967 291      | 2258 2104  | 0.14     | 0.7051752     | 1  | 1.03   | 0.87          | 1.23            |

Locus Alleles Chr Location Neighborhood  
rs7936636 C|T 11p11.2 44397546

| SUBSET   | Rank | MAF         | Geno Counts                 | Subjects   | score X2 | score p-value | df | hom OR | hom OR 95% CI | hom OR 95% CI_u |
|----------|------|-------------|-----------------------------|------------|----------|---------------|----|--------|---------------|-----------------|
| STAGE1-3 | 23   | 0.254 0.246 | 5706 3954 643 5366 3460 582 | 10303 9408 | 0.01     | 0.9306505     | 1  | 0.99   | 0.89          | 1.12            |
| NHS      | 20   | 0.256 0.240 | 635 430 77 673 395 77       | 1142 1145  | 0.00     | 0.9949752     | 1  | 1.00   | 0.72          | 1.39            |
| STAGE1-2 | 22   | 0.263 0.244 | 2852 2086 344 3144 1940 355 | 5282 5439  | 0.01     | 0.9217735     | 1  | 1.01   | 0.86          | 1.18            |
| STAGE2   | 23   | 0.264 0.245 | 2217 1656 267 2471 1545 278 | 4140 4294  | 0.01     | 0.909302      | 1  | 1.01   | 0.85          | 1.20            |
| CPSII    | 19   | 0.266 0.233 | 286 224 32 323 175 37       | 542 535    | 0.39     | 0.5308112     | 1  | 1.17   | 0.72          | 1.92            |
| PBCS1    | 20   | 0.247 0.226 | 284 193 28 406 222 40       | 505 668    | 0.07     | 0.7864181     | 1  | 1.07   | 0.65          | 1.78            |
| PLCO     | 12   | 0.263 0.249 | 526 385 64 546 332 70       | 975 948    | 0.51     | 0.4730249     | 1  | 1.14   | 0.80          | 1.63            |
| WHI      | 21   | 0.270 0.247 | 1272 973 163 1358 890 146   | 2408 2394  | 0.84     | 0.3604068     | 1  | 0.90   | 0.71          | 1.13            |
| STAGE3   | 18   | 0.246 0.249 | 2854 1868 299 2222 1521 226 | 5021 3969  | 0.07     | 0.7850201     | 1  | 0.98   | 0.82          | 1.17            |
| NHS2     | 13   | 0.266 0.235 | 598 438 77 330 197 33       | 1113 560   | 0.64     | 0.4237812     | 1  | 0.84   | 0.55          | 1.28            |
| NOR      | 1    | 0.192 0.237 | 326 153 19 301 185 30       | 498 516    | 2.39     | 0.1218661     | 1  | 1.59   | 0.88          | 2.87            |
| PBCS2    | 13   | 0.245 0.264 | 993 643 105 769 569 94      | 1741 1432  | 0.38     | 0.5357443     | 1  | 1.10   | 0.82          | 1.46            |
| USRT     | 5    | 0.254 0.240 | 553 376 64 442 301 37       | 993 780    | 2.30     | 0.1292875     | 1  | 0.72   | 0.48          | 1.10            |
| WHS      | 19   | 0.241 0.244 | 384 258 34 380 269 32       | 676 681    | 0.08     | 0.7784936     | 1  | 0.93   | 0.57          | 1.53            |
| PBCS 1+2 | 15   | 0.245 0.252 | 1277 836 133 1175 790 135   | 2246 2100  | 0.54     | 0.4622976     | 1  | 1.10   | 0.86          | 1.41            |

Locus Alleles Chr Location Neighborhood  
rs12622050 G|A 2q11.2 100945886 NPAS2

| SUBSET   | Rank | MAF         | Geno Counts                 | Subjects   | score X2 | score p-value | df | hom OR | hom OR 95% CI | hom OR 95% CI_u |
|----------|------|-------------|-----------------------------|------------|----------|---------------|----|--------|---------------|-----------------|
| STAGE1-3 | 24   | 0.223 0.212 | 6195 3596 493 5841 3084 449 | 10284 9374 | 0.00     | 0.979985      | 1  | 1.00   | 0.87          | 1.14            |
| NHS      | 14   | 0.220 0.189 | 695 392 55 754 349 42       | 1142 1145  | 1.76     | 0.184903      | 1  | 0.76   | 0.50          | 1.14            |
| STAGE1-2 | 23   | 0.220 0.201 | 3183 1875 227 3482 1721 235 | 5285 5438  | 0.00     | 0.9604555     | 1  | 1.00   | 0.83          | 1.20            |
| STAGE2   | 20   | 0.220 0.205 | 2488 1483 172 2728 1372 193 | 4143 4293  | 0.40     | 0.5287832     | 1  | 1.07   | 0.87          | 1.32            |
| CPSII    | 5    | 0.217 0.205 | 323 203 16 341 165 27       | 542 533    | 2.96     | 0.0854227     | 1  | 1.73   | 0.92          | 3.27            |
| PBCS1    | 10   | 0.244 0.239 | 284 197 25 391 235 42       | 506 668    | 1.04     | 0.306736      | 1  | 1.31   | 0.78          | 2.20            |
| PLCO     | 8    | 0.229 0.199 | 577 350 48 606 307 35       | 975 948    | 1.96     | 0.1620425     | 1  | 0.73   | 0.46          | 1.14            |
| WHI      | 22   | 0.213 0.196 | 1476 838 95 1557 734 102    | 2409 2393  | 0.27     | 0.6003781     | 1  | 1.08   | 0.81          | 1.44            |
| STAGE3   | 22   | 0.225 0.227 | 3013 1723 266 2360 1365 213 | 5002 3938  | 0.02     | 0.8948601     | 1  | 1.01   | 0.84          | 1.22            |
| NHS2     | 10   | 0.200 0.204 | 712 332 53 344 181 21       | 1097 546   | 0.80     | 0.3713822     | 1  | 0.79   | 0.47          | 1.32            |
| NOR      | 15   | 0.221 0.219 | 297 179 20 314 175 25       | 496 514    | 0.38     | 0.5366419     | 1  | 1.21   | 0.66          | 2.21            |
| PBCS2    | 18   | 0.252 0.258 | 980 644 117 793 540 99      | 1741 1432  | 0.08     | 0.7764969     | 1  | 1.04   | 0.79          | 1.38            |
| USRT     | 13   | 0.206 0.205 | 626 327 41 495 242 38       | 994 775    | 0.58     | 0.4472431     | 1  | 1.19   | 0.76          | 1.88            |
| WHS      | 15   | 0.231 0.214 | 398 241 35 414 227 30       | 674 671    | 0.38     | 0.539413      | 1  | 0.86   | 0.52          | 1.41            |
| PBCS 1+2 | 16   | 0.250 0.252 | 1263 839 142 1183 773 142   | 2244 2098  | 0.47     | 0.4932537     | 1  | 1.09   | 0.85          | 1.39            |

unadj\_geno

| Locus      | Alleles | Chr    | Location | Neighborhood        |
|------------|---------|--------|----------|---------------------|
| rs11249433 | T C     | 1p11.2 |          | 120982136 LOC647121 |

| SUBSET   | Rank | MAF         | Geno Counts                   | Subjects   | score X2 | score p-value | df | het OR | het OR 95% CI | het OR 95% CI | hom OR | hom OR 95% CI | hom OR 95% CI_u |
|----------|------|-------------|-------------------------------|------------|----------|---------------|----|--------|---------------|---------------|--------|---------------|-----------------|
| STAGE1-3 | 1    | 0.393 0.425 | 3965 4951 1699 3207 4650 1761 | 10615 9618 | 41.63    | 9.11E-10      | 2  | 1.16   | 1.09          | 1.23          | 1.28   | 1.18          | 1.39            |
| NHS      | 3    | 0.388 0.440 | 425 541 170 358 563 220       | 1136 1141  | 12.57    | 0.0018633     | 2  | 1.24   | 1.03          | 1.48          | 1.54   | 1.20          | 1.96            |
| STAGE1-2 | 7    | 0.401 0.431 | 2022 2615 919 1821 2814 1036  | 5556 5671  | 23.63    | 7.38E-06      | 2  | 1.19   | 1.10          | 1.30          | 1.25   | 1.12          | 1.40            |
| STAGE2   | 14   | 0.404 0.429 | 1597 2074 749 1463 2251 816   | 4420 4530  | 14.63    | 0.0006654     | 2  | 1.18   | 1.08          | 1.30          | 1.19   | 1.05          | 1.34            |
| CPSII    | 5    | 0.378 0.417 | 220 235 88 178 267 89         | 543 534    | 6.40     | 0.0407034     | 2  | 1.40   | 1.08          | 1.83          | 1.25   | 0.88          | 1.78            |
| PBCS1    | 18   | 0.387 0.393 | 195 230 81 243 326 100        | 506 669    | 1.24     | 0.5373314     | 2  | 1.14   | 0.88          | 1.46          | 0.99   | 0.70          | 1.40            |
| PLCO     | 23   | 0.420 0.421 | 324 476 169 315 465 165       | 969 945    | 0.00     | 0.998845      | 2  | 1.00   | 0.82          | 1.23          | 1.00   | 0.77          | 1.31            |
| WHI      | 3    | 0.407 0.444 | 858 1133 411 727 1193 462     | 2402 2382  | 15.27    | 0.000483      | 2  | 1.24   | 1.09          | 1.41          | 1.33   | 1.12          | 1.57            |
| STAGE3   | 1    | 0.385 0.416 | 1947 2338 780 1386 1836 725   | 5065 3947  | 18.40    | 1.01E-04      | 2  | 1.10   | 1.01          | 1.21          | 1.31   | 1.16          | 1.48            |
| NHS2     | 4    | 0.400 0.442 | 433 545 197 190 259 124       | 1175 573   | 6.57     | 0.0373648     | 2  | 1.08   | 0.86          | 1.36          | 1.43   | 1.08          | 1.90            |
| NOR      | 5    | 0.380 0.408 | 184 242 66 180 244 86         | 492 510    | 2.36     | 0.3070984     | 2  | 1.03   | 0.79          | 1.35          | 1.33   | 0.91          | 1.95            |
| PBCS2    | 1    | 0.362 0.398 | 719 778 240 518 661 231       | 1737 1410  | 8.46     | 0.0145629     | 2  | 1.18   | 1.01          | 1.37          | 1.34   | 1.08          | 1.65            |
| USRT     | 5    | 0.385 0.410 | 387 443 159 271 371 132       | 989 774    | 3.15     | 0.2069143     | 2  | 1.20   | 0.97          | 1.47          | 1.19   | 0.90          | 1.57            |
| WHS      | 1    | 0.421 0.445 | 224 330 118 227 301 152       | 672 680    | 5.59     | 0.0612035     | 2  | 0.90   | 0.71          | 1.15          | 1.27   | 0.94          | 1.72            |
| PBCS 1+2 | 1    | 0.368 0.397 | 910 1006 321 761 987 331      | 2237 2079  | 7.85     | 0.0197716     | 2  | 1.17   | 1.03          | 1.34          | 1.23   | 1.03          | 1.48            |

| Locus    | Alleles | Chr     | Location | Neighborhood     |
|----------|---------|---------|----------|------------------|
| rs999737 | C T     | 14q24.1 |          | 68104435 RAD51L1 |

| SUBSET   | Rank | MAF         | Geno Counts                 | Subjects   | score X2 | score p-value | df | het OR | het OR 95% CI | het OR 95% CI | hom OR | hom OR 95% CI | hom OR 95% CI_u |
|----------|------|-------------|-----------------------------|------------|----------|---------------|----|--------|---------------|---------------|--------|---------------|-----------------|
| STAGE1-3 | 2    | 0.239 0.218 | 6217 3775 655 5890 3353 435 | 10647 9678 | 32.10    | 1.07E-07      | 2  | 0.94   | 0.88          | 0.99          | 0.70   | 0.62          | 0.80            |
| NHS      | 10   | 0.244 0.213 | 660 406 76 703 394 47       | 1142 1144  | 8.37     | 0.0152053     | 2  | 0.91   | 0.77          | 1.08          | 0.58   | 0.40          | 0.85            |
| STAGE1-2 | 3    | 0.238 0.213 | 3263 1972 341 3506 1947 237 | 5576 5690  | 26.44    | 1.81E-06      | 2  | 0.92   | 0.85          | 0.99          | 0.65   | 0.54          | 0.77            |
| STAGE2   | 6    | 0.236 0.213 | 2603 1566 265 2803 1553 190 | 4434 4546  | 18.42    | 9.99E-05      | 2  | 0.92   | 0.84          | 1.01          | 0.67   | 0.55          | 0.81            |
| CPSII    | 21   | 0.235 0.222 | 319 193 31 325 182 28       | 543 535    | 0.47     | 0.7898729     | 2  | 0.93   | 0.72          | 1.19          | 0.89   | 0.52          | 1.51            |
| PBCS1    | 9    | 0.242 0.213 | 291 185 30 409 234 25       | 506 668    | 3.79     | 0.1500041     | 2  | 0.90   | 0.70          | 1.15          | 0.59   | 0.34          | 1.03            |
| PLCO     | 3    | 0.238 0.215 | 576 334 65 576 336 36       | 975 948    | 7.96     | 0.0187308     | 2  | 1.01   | 0.83          | 1.22          | 0.55   | 0.36          | 0.85            |
| WHI      | 10   | 0.235 0.209 | 1417 854 139 1493 801 101   | 2410 2395  | 9.65     | 0.0080181     | 2  | 0.89   | 0.79          | 1.00          | 0.69   | 0.53          | 0.90            |
| STAGE3   | 5    | 0.240 0.226 | 2955 1806 314 2386 1408 197 | 5075 3991  | 7.18     | 0.0275469     | 2  | 0.97   | 0.88          | 1.05          | 0.78   | 0.65          | 0.94            |
| NHS2     | 16   | 0.232 0.226 | 698 374 81 350 195 33       | 1153 578   | 1.21     | 0.546058      | 2  | 1.04   | 0.84          | 1.29          | 0.81   | 0.53          | 1.24            |
| NOR      | 3    | 0.257 0.215 | 271 195 30 319 171 25       | 496 515    | 5.58     | 0.0614735     | 2  | 0.75   | 0.57          | 0.97          | 0.71   | 0.41          | 1.23            |
| PBCS2    | 11   | 0.236 0.226 | 1016 637 94 850 514 66      | 1747 1430  | 1.19     | 0.550635      | 2  | 0.96   | 0.83          | 1.12          | 0.84   | 0.60          | 1.16            |
| USRT     | 15   | 0.243 0.232 | 572 357 62 459 275 43       | 991 777    | 0.57     | 0.7527645     | 2  | 0.96   | 0.79          | 1.17          | 0.86   | 0.57          | 1.30            |
| WHS      | 4    | 0.245 0.226 | 398 243 47 408 253 30       | 688 691    | 4.07     | 0.1305223     | 2  | 1.02   | 0.81          | 1.27          | 0.62   | 0.39          | 1.00            |

PBCS 1+2 6 0.237|0.222 1306|819|124|1257|746|92 2249|2095 3.63 0.1630236 2 0.95 0.83 1.07 0.77 0.58 1.02

Locus Alleles Chr Location Neighborhood  
rs7716600 C|A 5p12 44910762

| SUBSET   | Rank | MAF         | Geno Counts                 | Subjects   | score X2 | score p-value | df | het OR | het OR 95% CI | het OR 95% CI | hom OR | hom OR 95% CI | hom OR 95% CI_u |
|----------|------|-------------|-----------------------------|------------|----------|---------------|----|--------|---------------|---------------|--------|---------------|-----------------|
| STAGE1-3 | 3    | 0.221 0.241 | 6483 3665 524/5603 3498 581 | 10672 9682 | 22.81    | 1.11E-05      | 2  | 1.10   | 1.04          | 1.17          | 1.28   | 1.13          | 1.45            |
| NHS      | 6    | 0.215 0.249 | 693 402 44/652 415 78       | 1139 1145  | 10.92    | 0.0042612     | 2  | 1.10   | 0.92          | 1.31          | 1.88   | 1.28          | 2.77            |
| STAGE1-2 | 1    | 0.216 0.243 | 3402 1924 241/3288 2028 370 | 5567 5686  | 30.66    | 2.20E-07      | 2  | 1.09   | 1.01          | 1.18          | 1.59   | 1.34          | 1.88            |
| STAGE2   | 3    | 0.216 0.242 | 2709 1522 197/2636 1613 292 | 4428 4541  | 20.67    | 3.24E-05      | 2  | 1.09   | 1.00          | 1.19          | 1.52   | 1.26          | 1.84            |
| CPSII    | 18   | 0.225 0.236 | 325 192 26/315 186 33       | 543 534    | 1.01     | 0.6044544     | 2  | 1.00   | 0.78          | 1.29          | 1.31   | 0.77          | 2.24            |
| PBCS1    | 3    | 0.217 0.263 | 308 173 23/362 256 47       | 504 665    | 6.59     | 0.0370599     | 2  | 1.26   | 0.98          | 1.61          | 1.74   | 1.03          | 2.93            |
| PLCO     | 15   | 0.223 0.238 | 577 359 37/546 353 49       | 973 948    | 2.26     | 0.3237197     | 2  | 1.04   | 0.86          | 1.25          | 1.40   | 0.90          | 2.18            |
| WHI      | 5    | 0.212 0.239 | 1499 798 111/1413 818 163   | 2408 2394  | 12.62    | 0.0018223     | 2  | 1.09   | 0.96          | 1.23          | 1.56   | 1.21          | 2.00            |
| STAGE3   | 4    | 0.226 0.237 | 3081 1743 283/2314 1473 210 | 5107 3997  | 7.29     | 0.0260834     | 2  | 1.13   | 1.03          | 1.23          | 0.99   | 0.82          | 1.19            |
| NHS2     | 8    | 0.227 0.235 | 712 397 69/338 219 28       | 1178 585   | 2.84     | 0.2415872     | 2  | 1.16   | 0.94          | 1.43          | 0.85   | 0.54          | 1.35            |
| NOR      | 17   | 0.246 0.241 | 284 178 33/293 191 28       | 495 512    | 0.72     | 0.6971789     | 2  | 1.04   | 0.80          | 1.35          | 0.82   | 0.48          | 1.40            |
| PBCS2    | 4    | 0.223 0.231 | 1070 586 98/847 518 74      | 1754 1439  | 2.43     | 0.2972865     | 2  | 1.12   | 0.96          | 1.30          | 0.95   | 0.70          | 1.31            |
| USRT     | 3    | 0.216 0.253 | 604 350 39/430 293 49       | 993 772    | 7.92     | 0.0190445     | 2  | 1.18   | 0.96          | 1.43          | 1.76   | 1.14          | 2.74            |
| WHS      | 5    | 0.233 0.228 | 411 232 44/406 252 31       | 687 689    | 3.11     | 0.2114558     | 2  | 1.10   | 0.88          | 1.38          | 0.71   | 0.44          | 1.15            |
| PBCS 1+2 | 3    | 0.221 0.241 | 1378 757 121/1210 771 122   | 2256 2103  | 5.67     | 0.0585769     | 2  | 1.16   | 1.02          | 1.32          | 1.15   | 0.88          | 1.49            |

Locus Alleles Chr Location Neighborhood  
rs2303659 G|A 11q24.3 129326474 PRDM10

| SUBSET   | Rank | MAF         | Geno Counts             | Subjects   | score X2 | score p-value | df | het OR | het OR 95% CI | het OR 95% CI | hom OR | hom OR 95% CI | hom OR 95% CI_u |
|----------|------|-------------|-------------------------|------------|----------|---------------|----|--------|---------------|---------------|--------|---------------|-----------------|
| STAGE1-3 | 4    | 0.035 0.028 | 9926 718 10/9156 508 14 | 10654 9678 | 20.91    | 2.89E-05      | 2  | 0.77   | 0.68          | 0.86          | 1.52   | 0.67          | 3.42            |
| NHS      | 22   | 0.034 0.024 | 1064 78 0/1089 56 0     | 1142 1145  |          |               |    |        |               |               |        |               |                 |
| STAGE1-2 | 16   | 0.034 0.025 | 5198 376 2/5412 277 3   | 5576 5692  | 18.33    | 1.05E-04      | 2  | 0.71   | 0.60          | 0.83          | 1.44   | 0.24          | 8.63            |
| STAGE2   | 15   | 0.034 0.025 | 4134 298 2/4323 221 3   | 4434 4547  | 14.43    | 0.0007361     | 2  | 0.71   | 0.59          | 0.85          | 1.43   | 0.24          | 8.59            |
| CPSII    | 24   | 0.030 0.017 | 510 33 0/518 16 1       | 543 535    |          |               |    |        |               |               |        |               |                 |
| PBCS1    | 22   | 0.033 0.022 | 473 33 0/640 29 0       | 506 669    |          |               |    |        |               |               |        |               |                 |
| PLCO     | 17   | 0.036 0.028 | 906 68 1/895 52 1       | 975 948    | 1.82     | 0.4021657     | 2  | 0.77   | 0.53          | 1.12          | 1.01   | 0.06          | 16.21           |
| WHI      | 17   | 0.034 0.026 | 2245 164 1/2270 124 1   | 2410 2395  | 5.65     | 0.0593914     | 2  | 0.75   | 0.59          | 0.95          | 0.99   | 0.06          | 15.82           |
| STAGE3   | 7    | 0.035 0.032 | 4728 342 8/3745 231 11  | 5078 3987  | 4.78     | 0.0914567     | 2  | 0.85   | 0.72          | 1.01          | 1.74   | 0.70          | 4.32            |
| NHS2     | 1    | 0.040 0.025 | 1074 82 5/558 21 4      | 1161 583   | 8.79     | 0.0123531     | 2  | 0.49   | 0.30          | 0.80          | 1.54   | 0.41          | 5.76            |
| NOR      | 24   | 0.036 0.043 | 460 36 0/472 44 0       | 496 516    |          |               |    |        |               |               |        |               |                 |
| PBCS2    | 13   | 0.032 0.030 | 1648 112 1/1358 83 2    | 1761 1443  | 1.07     | 0.5849969     | 2  | 0.90   | 0.67          | 1.21          | 2.43   | 0.22          | 26.79           |
| USRT     | 24   | 0.037 0.035 | 920 74 0/723 54 0       | 994 777    |          |               |    |        |               |               |        |               |                 |
| WHS      | 9    | 0.032 0.029 | 626 38 2/634 29 5       | 666 668    | 2.54     | 0.280485      | 2  | 0.75   | 0.46          | 1.24          | 2.47   | 0.48          | 12.77           |
| PBCS 1+2 | 9    | 0.032 0.027 | 2121 145 1/1997 112 2   | 2267 2111  | 2.75     | 0.2529247     | 2  | 0.82   | 0.64          | 1.06          | 2.12   | 0.19          | 23.44           |

Locus Alleles Chr Location Neighborhood  
rs3134615 G|T 1p34.2 40134653 TRIT1,MYCL1

| SUBSET   | Rank | MAF         | Geno Counts                 | Subjects   | score X2 | score p-value | df | het OR | het OR 95% CI | het OR 95% CI | hom OR | hom OR 95% CI | hom OR 95% CI_u |
|----------|------|-------------|-----------------------------|------------|----------|---------------|----|--------|---------------|---------------|--------|---------------|-----------------|
| STAGE1-3 | 5    | 0.228 0.246 | 6374 3763 552/5488 3630 568 | 10689 9686 | 19.47    | 5.91E-05      | 2  | 1.12   | 1.06          | 1.19          | 1.20   | 1.06          | 1.35            |
| NHS      | 4    | 0.220 0.263 | 690 402 50/617 454 74       | 1142 1145  | 11.88    | 0.0026355     | 2  | 1.26   | 1.06          | 1.50          | 1.66   | 1.14          | 2.41            |
| STAGE1-2 | 17   | 0.227 0.250 | 3315 1996 265/3183 2170 339 | 5576 5692  | 17.82    | 1.35E-04      | 2  | 1.13   | 1.05          | 1.22          | 1.33   | 1.13          | 1.58            |
| STAGE2   | 20   | 0.228 0.247 | 2625 1594 215/2566 1716 265 | 4434 4547  | 8.96     | 0.0113605     | 2  | 1.10   | 1.01          | 1.20          | 1.26   | 1.04          | 1.52            |
| CPSII    | 9    | 0.215 0.236 | 326 200 17/313 192 30       | 543 535    | 3.96     | 0.1377703     | 2  | 1.00   | 0.78          | 1.29          | 1.84   | 0.99          | 3.40            |
| PBCS1    | 20   | 0.226 0.238 | 299 185 22/387 245 37       | 506 669    | 0.88     | 0.6442656     | 2  | 1.02   | 0.80          | 1.31          | 1.30   | 0.75          | 2.25            |
| PLCO     | 5    | 0.236 0.258 | 578 334 63/516 375 57       | 975 948    | 5.81     | 0.054839      | 2  | 1.26   | 1.04          | 1.52          | 1.01   | 0.69          | 1.48            |
| WHI      | 20   | 0.228 0.248 | 1422 875 113/1350 904 141   | 2410 2395  | 5.38     | 0.0677891     | 2  | 1.09   | 0.97          | 1.23          | 1.31   | 1.02          | 1.70            |
| STAGE3   | 8    | 0.229 0.240 | 3059 1767 287/2305 1463 230 | 5113 3998  | 4.50     | 0.1055262     | 2  | 1.10   | 1.01          | 1.20          | 1.06   | 0.89          | 1.28            |
| NHS2     | 13   | 0.225 0.235 | 724 388 73/341 209 32       | 1185 582   | 1.85     | 0.3957367     | 2  | 1.14   | 0.93          | 1.41          | 0.93   | 0.60          | 1.44            |
| NOR      | 10   | 0.232 0.253 | 292 179 26/284 200 30       | 497 514    | 1.27     | 0.5286338     | 2  | 1.15   | 0.89          | 1.49          | 1.19   | 0.68          | 2.06            |

|          |    |             |                           |           |      |           |   |      |      |      |      |      |      |
|----------|----|-------------|---------------------------|-----------|------|-----------|---|------|------|------|------|------|------|
| PBCS2    | 17 | 0.226 0.231 | 1063 591 102 854 504 81   | 1756 1439 | 0.66 | 0.7178971 | 2 | 1.06 | 0.91 | 1.23 | 0.99 | 0.73 | 1.34 |
| USRT     | 8  | 0.240 0.246 | 567 373 51 445 276 52     | 991 773   | 2.31 | 0.3151945 | 2 | 0.94 | 0.77 | 1.15 | 1.30 | 0.87 | 1.95 |
| WHS      | 3  | 0.224 0.249 | 413 236 35 381 274 35     | 684 690   | 4.09 | 0.1290622 | 2 | 1.26 | 1.01 | 1.57 | 1.08 | 0.66 | 1.77 |
| PBCS 1+2 | 18 | 0.226 0.233 | 1362 776 124 1241 746 117 | 2262 2104 | 0.70 | 0.7038391 | 2 | 1.06 | 0.93 | 1.20 | 1.04 | 0.80 | 1.35 |

Locus rs4415084 Alleles C|T Chr 5p12 Location Neighborhood 44698272

| SUBSET   | Rank | MAF         | Geno Counts                   | Subjects   | score X2 | score p-value | df | het OR | het OR 95% CI | het OR 95% CI | hom OR | hom OR 95% CI | hom OR 95% CI_u |
|----------|------|-------------|-------------------------------|------------|----------|---------------|----|--------|---------------|---------------|--------|---------------|-----------------|
| STAGE1-3 | 6    | 0.407 0.429 | 3779 5060 1804 3184 4660 1808 | 10643 9652 | 18.96    | 7.62E-05      | 2  | 1.09   | 1.03          | 1.16          | 1.19   | 1.10          | 1.29            |
| NHS      | 2    | 0.392 0.435 | 429 513 186 350 583 203       | 1128 1136  | 13.20    | 0.0013623     | 2  | 1.39   | 1.16          | 1.68          | 1.34   | 1.05          | 1.71            |
| STAGE1-2 | 21   | 0.404 0.426 | 1986 2660 914 1884 2752 1046  | 5560 5682  | 11.82    | 0.0027128     | 2  | 1.09   | 1.00          | 1.18          | 1.21   | 1.08          | 1.35            |
| STAGE2   | 22   | 0.406 0.424 | 1557 2147 728 1534 2169 843   | 4432 4546  | 7.26     | 0.026581      | 2  | 1.03   | 0.93          | 1.12          | 1.18   | 1.04          | 1.33            |
| CPSII    | 17   | 0.427 0.399 | 178 265 99 193 257 85         | 542 535    | 1.75     | 0.4170978     | 2  | 0.89   | 0.69          | 1.17          | 0.79   | 0.56          | 1.13            |
| PBCS1    | 4    | 0.410 0.460 | 174 249 83 193 337 139        | 506 669    | 5.82     | 0.0543404     | 2  | 1.22   | 0.94          | 1.59          | 1.51   | 1.07          | 2.12            |
| PLCO     | 19   | 0.408 0.422 | 339 475 160 321 454 173       | 974 948    | 1.12     | 0.5707497     | 2  | 1.01   | 0.83          | 1.23          | 1.14   | 0.88          | 1.49            |
| WHI      | 16   | 0.400 0.420 | 866 1158 386 827 1121 446     | 2410 2394  | 5.77     | 0.0557765     | 2  | 1.01   | 0.89          | 1.15          | 1.21   | 1.02          | 1.43            |
| STAGE3   | 3    | 0.411 0.433 | 1793 2403 891 1302 1913 765   | 5087 3980  | 8.08     | 0.0176291     | 2  | 1.10   | 1.00          | 1.20          | 1.18   | 1.05          | 1.33            |
| NHS2     | 6    | 0.399 0.434 | 436 540 199 188 281 111       | 1175 580   | 3.99     | 0.1363078     | 2  | 1.21   | 0.96          | 1.51          | 1.29   | 0.97          | 1.73            |
| NOR      | 11   | 0.438 0.413 | 156 242 95 177 248 88         | 493 513    | 1.27     | 0.5303489     | 2  | 0.90   | 0.68          | 1.19          | 0.82   | 0.57          | 1.17            |
| PBCS2    | 9    | 0.424 0.435 | 593 833 328 457 711 271       | 1754 1439  | 1.62     | 0.445049      | 2  | 1.11   | 0.95          | 1.30          | 1.07   | 0.88          | 1.31            |
| USRT     | 2    | 0.388 0.445 | 374 467 151 252 358 166       | 992 776    | 12.69    | 0.0017576     | 2  | 1.14   | 0.92          | 1.40          | 1.63   | 1.24          | 2.14            |
| WHS      | 18   | 0.414 0.426 | 234 321 118 228 315 129       | 673 672    | 0.62     | 0.7321055     | 2  | 1.01   | 0.79          | 1.28          | 1.12   | 0.82          | 1.53            |
| PBCS 1+2 | 4    | 0.421 0.443 | 767 1079 410 648 1043 407     | 2256 2098  | 4.90     | 0.0861896     | 2  | 1.14   | 1.00          | 1.31          | 1.18   | 0.99          | 1.40            |

Locus rs7121523 Alleles G|A Chr 11p15.4 Location Neighborhood 7556781 PPFIBP2

| SUBSET   | Rank | MAF         | Geno Counts                 | Subjects   | score X2 | score p-value | df | het OR | het OR 95% CI | het OR 95% CI | hom OR | hom OR 95% CI | hom OR 95% CI_u |
|----------|------|-------------|-----------------------------|------------|----------|---------------|----|--------|---------------|---------------|--------|---------------|-----------------|
| STAGE1-3 | 7    | 0.159 0.163 | 7513 2919 235 6829 2540 303 | 10667 9672 | 18.90    | 7.88E-05      | 2  | 0.96   | 0.90          | 1.02          | 1.42   | 1.19          | 1.69            |
| NHS      | 11   | 0.158 0.169 | 808 306 28 810 283 52       | 1142 1145  | 8.10     | 0.0174513     | 2  | 0.92   | 0.76          | 1.11          | 1.85   | 1.16          | 2.96            |
| STAGE1-2 | 2    | 0.156 0.164 | 3941 1525 106 4028 1461 200 | 5572 5689  | 29.98    | 3.08E-07      | 2  | 0.94   | 0.86          | 1.02          | 1.85   | 1.45          | 2.35            |
| STAGE2   | 2    | 0.155 0.162 | 3133 1219 78 3218 1178 148  | 4430 4544  | 22.08    | 1.61E-05      | 2  | 0.94   | 0.86          | 1.03          | 1.85   | 1.40          | 2.44            |
| CPSII    | 13   | 0.173 0.177 | 368 161 13 366 147 21       | 542 534    | 2.46     | 0.2915886     | 2  | 0.92   | 0.70          | 1.20          | 1.62   | 0.80          | 3.29            |
| PBCS1    | 10   | 0.138 0.156 | 373 123 8 481 165 22        | 504 668    | 3.43     | 0.1795265     | 2  | 1.04   | 0.79          | 1.36          | 2.13   | 0.94          | 4.84            |
| PLCO     | 13   | 0.156 0.166 | 688 270 17 661 259 28       | 975 948    | 3.08     | 0.214431      | 2  | 1.00   | 0.82          | 1.22          | 1.71   | 0.93          | 3.16            |
| WHI      | 4    | 0.155 0.159 | 1704 665 40 1710 607 77     | 2409 2394  | 14.31    | 0.0007812     | 2  | 0.91   | 0.80          | 1.03          | 1.92   | 1.30          | 2.83            |
| STAGE3   | 22   | 0.162 0.161 | 3572 1394 128 2801 1080 103 | 5094 3984  | 0.11     | 0.9458492     | 2  | 0.99   | 0.90          | 1.08          | 1.03   | 0.79          | 1.34            |
| NHS2     | 11   | 0.167 0.160 | 811 332 30 418 149 19       | 1173 586   | 2.11     | 0.3483123     | 2  | 0.87   | 0.69          | 1.09          | 1.23   | 0.68          | 2.21            |
| NOR      | 21   | 0.172 0.177 | 342 136 17 347 147 17       | 495 511    | 0.21     | 0.9005829     | 2  | 1.07   | 0.81          | 1.41          | 0.99   | 0.50          | 1.96            |
| PBCS2    | 24   | 0.148 0.151 | 1266 440 38 1023 369 31     | 1744 1423  | 0.20     | 0.9028441     | 2  | 1.04   | 0.88          | 1.22          | 1.01   | 0.62          | 1.63            |
| USRT     | 20   | 0.177 0.172 | 668 301 25 527 223 21       | 994 771    | 0.43     | 0.8077199     | 2  | 0.94   | 0.76          | 1.16          | 1.06   | 0.59          | 1.92            |
| WHS      | 22   | 0.161 0.160 | 485 185 18 486 192 15       | 688 693    | 0.39     | 0.8246333     | 2  | 1.04   | 0.82          | 1.31          | 0.83   | 0.41          | 1.67            |
| PBCS 1+2 | 14   | 0.146 0.153 | 1639 563 47 1504 533 53     | 2249 2090  | 1.15     | 0.5613389     | 2  | 1.03   | 0.90          | 1.18          | 1.23   | 0.82          | 1.83            |

Locus rs17570439 Alleles T|C Chr 1p34.2 Location Neighborhood 40096797 TRIT1

| SUBSET   | Rank | MAF         | Geno Counts                 | Subjects   | score X2 | score p-value | df | het OR | het OR 95% CI | het OR 95% CI | hom OR | hom OR 95% CI | hom OR 95% CI_u |
|----------|------|-------------|-----------------------------|------------|----------|---------------|----|--------|---------------|---------------|--------|---------------|-----------------|
| STAGE1-3 | 8    | 0.209 0.226 | 6650 3528 455 5797 3380 500 | 10633 9677 | 18.79    | 8.31E-05      | 2  | 1.10   | 1.04          | 1.17          | 1.26   | 1.11          | 1.44            |
| NHS      | 5    | 0.204 0.244 | 719 381 42 654 424 67       | 1142 1145  | 11.10    | 0.0038794     | 2  | 1.22   | 1.03          | 1.46          | 1.75   | 1.18          | 2.62            |
| STAGE1-2 | 12   | 0.207 0.230 | 3473 1895 208 3380 2006 303 | 5576 5689  | 20.95    | 2.82E-05      | 2  | 1.09   | 1.01          | 1.18          | 1.50   | 1.25          | 1.80            |
| STAGE2   | 17   | 0.208 0.226 | 2754 1514 166 2726 1582 236 | 4434 4544  | 12.48    | 0.0019501     | 2  | 1.06   | 0.97          | 1.15          | 1.44   | 1.17          | 1.76            |
| CPSII    | 6    | 0.196 0.218 | 343 187 13 329 179 27       | 543 535    | 5.31     | 0.0703884     | 2  | 1.00   | 0.77          | 1.29          | 2.17   | 1.10          | 4.27            |
| PBCS1    | 15   | 0.210 0.222 | 310 179 17 406 228 34       | 506 668    | 2.12     | 0.3458451     | 2  | 0.97   | 0.76          | 1.24          | 1.53   | 0.84          | 2.78            |
| PLCO     | 14   | 0.220 0.235 | 599 323 53 552 346 50       | 975 948    | 2.42     | 0.2983922     | 2  | 1.16   | 0.96          | 1.41          | 1.02   | 0.68          | 1.53            |
| WHI      | 9    | 0.206 0.225 | 1502 825 83 1439 829 125    | 2410 2393  | 9.78     | 0.0075217     | 2  | 1.05   | 0.93          | 1.18          | 1.57   | 1.18          | 2.09            |

|          |    |             |                             |           |      |           |   |      |      |      |      |      |      |
|----------|----|-------------|-----------------------------|-----------|------|-----------|---|------|------|------|------|------|------|
| STAGE3   | 6  | 0.210 0.222 | 3177 1634 247 2416 1374 197 | 5058 3987 | 4.90 | 0.0862191 | 2 | 1.11 | 1.01 | 1.21 | 1.05 | 0.86 | 1.27 |
| NHS2     | 5  | 0.206 0.227 | 730 346 61 342 202 29       | 1137 573  | 4.07 | 0.1305538 | 2 | 1.25 | 1.00 | 1.55 | 1.01 | 0.64 | 1.61 |
| NOR      | 9  | 0.210 0.233 | 310 164 22 301 185 27       | 496 513   | 1.62 | 0.4447643 | 2 | 1.16 | 0.89 | 1.51 | 1.26 | 0.70 | 2.27 |
| PBCS2    | 16 | 0.208 0.216 | 1111 557 86 891 478 72      | 1754 1441 | 0.79 | 0.6734623 | 2 | 1.07 | 0.92 | 1.24 | 1.04 | 0.75 | 1.45 |
| USRT     | 12 | 0.218 0.221 | 607 344 45 476 258 43       | 996 777   | 1.14 | 0.5644929 | 2 | 0.96 | 0.78 | 1.17 | 1.22 | 0.79 | 1.88 |
| WHS      | 8  | 0.214 0.222 | 419 223 33 406 251 26       | 675 683   | 2.64 | 0.2668244 | 2 | 1.16 | 0.93 | 1.46 | 0.81 | 0.48 | 1.38 |
| PBCS 1+2 | 15 | 0.208 0.218 | 1421 735 103 1298 706 106   | 2259 2110 | 1.11 | 0.5738796 | 2 | 1.05 | 0.93 | 1.19 | 1.13 | 0.85 | 1.49 |

Locus Alleles Chr Location Neighborhood  
rs10850145 C|T 12q24.13 112428512

| SUBSET   | Rank | MAF         | Geno Counts                | Subjects   | score X2 | score p-value | df | het OR | het OR 95% CI | het OR 95% CI | hom OR | hom OR 95% CI | hom OR 95% CI_u |
|----------|------|-------------|----------------------------|------------|----------|---------------|----|--------|---------------|---------------|--------|---------------|-----------------|
| STAGE1-3 | 9    | 0.095 0.106 | 8763 1844 91 7754 1837 115 | 10698 9706 | 16.26    | 2.95E-04      | 2  | 1.13   | 1.05          | 1.21          | 1.43   | 1.08          | 1.88            |
| NHS      | 7    | 0.086 0.110 | 951 186 5 912 215 18       | 1142 1145  | 10.26    | 0.0059237     | 2  | 1.21   | 0.97          | 1.50          | 3.75   | 1.39          | 10.15           |
| STAGE1-2 | 14   | 0.090 0.108 | 4627 897 52 4535 1085 70   | 5576 6690  | 20.26    | 3.99E-05      | 2  | 1.23   | 1.12          | 1.36          | 1.37   | 0.96          | 1.97            |
| STAGE2   | 12   | 0.091 0.107 | 3676 711 47 3623 870 52    | 4434 4545  | 15.26    | 0.0004861     | 2  | 1.24   | 1.11          | 1.38          | 1.12   | 0.75          | 1.67            |
| CPSII    | 16   | 0.099 0.107 | 444 90 9 426 103 6         | 543 535    | 1.79     | 0.4088547     | 2  | 1.19   | 0.87          | 1.63          | 0.69   | 0.25          | 1.97            |
| PBCS1    | 7    | 0.094 0.113 | 417 83 6 523 141 5         | 506 669    | 4.54     | 0.1034486     | 2  | 1.35   | 1.00          | 1.83          | 0.66   | 0.20          | 2.19            |
| PLCO     | 6    | 0.077 0.094 | 832 135 8 775 167 6        | 975 948    | 5.32     | 0.0699421     | 2  | 1.33   | 1.04          | 1.70          | 0.81   | 0.28          | 2.33            |
| WHI      | 13   | 0.094 0.111 | 1983 403 24 1899 459 35    | 2410 2393  | 7.45     | 0.024156      | 2  | 1.19   | 1.03          | 1.38          | 1.52   | 0.90          | 2.57            |
| STAGE3   | 9    | 0.100 0.105 | 4136 948 39 3221 752 45    | 5123 4018  | 3.30     | 0.1922955     | 2  | 1.02   | 0.92          | 1.13          | 1.48   | 0.96          | 2.28            |
| NHS2     | 2    | 0.103 0.108 | 947 218 12 474 96 15       | 1177 585   | 7.08     | 0.029057      | 2  | 0.88   | 0.68          | 1.15          | 2.50   | 1.16          | 5.38            |
| NOR      | 23   | 0.081 0.090 | 414 80 0 426 82 5          | 494 513    |          |               |    |        |               |               |        |               |                 |
| PBCS2    | 19   | 0.104 0.108 | 1412 338 15 1152 282 16    | 1765 1450  | 0.60     | 0.7415683     | 2  | 1.02   | 0.86          | 1.22          | 1.31   | 0.64          | 2.66            |
| USRT     | 23   | 0.105 0.106 | 799 184 12 622 146 9       | 995 777    | 0.03     | 0.9838525     | 2  | 1.02   | 0.80          | 1.30          | 0.96   | 0.40          | 2.30            |
| WHS      | 24   | 0.092 0.105 | 564 128 0 547 146 0        | 692 693    |          |               |    |        |               |               |        |               |                 |
| PBCS 1+2 | 11   | 0.102 0.110 | 1829 420 21 1673 423 21    | 2270 2117  | 1.63     | 0.4435626     | 2  | 1.10   | 0.95          | 1.28          | 1.09   | 0.59          | 2.01            |

Locus Alleles Chr Location Neighborhood  
rs998592 G|A 16p13.13 11107179 CLEC16A

| SUBSET   | Rank | MAF         | Geno Counts                   | Subjects   | score X2 | score p-value | df | het OR | het OR 95% CI | het OR 95% CI | hom OR | hom OR 95% CI | hom OR 95% CI_u |
|----------|------|-------------|-------------------------------|------------|----------|---------------|----|--------|---------------|---------------|--------|---------------|-----------------|
| STAGE1-3 | 10   | 0.426 0.414 | 3559 5120 1981 3270 4814 1604 | 10660 9688 | 14.90    | 0.0005802     | 2  | 1.02   | 0.96          | 1.09          | 0.88   | 0.81          | 0.96            |
| NHS      | 1    | 0.425 0.431 | 405 502 233 349 605 191       | 1140 1145  | 17.89    | 1.30E-04      | 2  | 1.40   | 1.16          | 1.68          | 0.95   | 0.75          | 1.21            |
| STAGE1-2 | 8    | 0.439 0.420 | 1803 2653 1118 1861 2884 947  | 5574 5692  | 23.48    | 7.96E-06      | 2  | 1.05   | 0.97          | 1.14          | 0.82   | 0.74          | 0.91            |
| STAGE2   | 10   | 0.442 0.417 | 1398 2151 885 1512 2279 756   | 4434 4547  | 16.89    | 2.15E-04      | 2  | 0.98   | 0.89          | 1.08          | 0.79   | 0.70          | 0.89            |
| CPSII    | 2    | 0.475 0.415 | 158 254 131 184 258 93        | 543 535    | 8.40     | 0.0150303     | 2  | 0.87   | 0.66          | 1.15          | 0.61   | 0.43          | 0.86            |
| PBCS1    | 1    | 0.415 0.369 | 186 220 100 264 316 89        | 506 669    | 8.91     | 0.0115979     | 2  | 1.01   | 0.78          | 1.31          | 0.63   | 0.45          | 0.88            |
| PLCO     | 22   | 0.419 0.411 | 324 485 166 320 476 152       | 975 948    | 0.35     | 0.8409453     | 2  | 0.99   | 0.81          | 1.21          | 0.93   | 0.71          | 1.21            |
| WHI      | 19   | 0.450 0.433 | 730 1192 488 744 1229 422     | 2410 2395  | 5.44     | 0.0659248     | 2  | 1.01   | 0.89          | 1.15          | 0.85   | 0.72          | 1.00            |
| STAGE3   | 18   | 0.412 0.406 | 1756 2467 864 1410 1932 657   | 5087 3999  | 0.78     | 0.6772194     | 2  | 0.98   | 0.89          | 1.07          | 0.95   | 0.84          | 1.07            |
| NHS2     | 22   | 0.418 0.427 | 394 568 202 192 283 107       | 1164 582   | 0.32     | 0.8518524     | 2  | 1.02   | 0.82          | 1.28          | 1.09   | 0.81          | 1.45            |
| NOR      | 20   | 0.390 0.400 | 186 231 77 187 245 84         | 494 516    | 0.24     | 0.8870538     | 2  | 1.05   | 0.80          | 1.38          | 1.09   | 0.75          | 1.57            |
| PBCS2    | 21   | 0.400 0.394 | 625 849 274 528 682 223       | 1748 1433  | 0.42     | 0.8101147     | 2  | 0.95   | 0.82          | 1.11          | 0.96   | 0.78          | 1.19            |
| USRT     | 9    | 0.439 0.415 | 313 490 192 268 373 136       | 995 777    | 2.12     | 0.3462575     | 2  | 0.89   | 0.72          | 1.10          | 0.83   | 0.63          | 1.09            |
| WHS      | 14   | 0.413 0.407 | 238 329 119 235 349 107       | 686 691    | 1.23     | 0.5411745     | 2  | 1.07   | 0.85          | 1.36          | 0.91   | 0.66          | 1.25            |
| PBCS 1+2 | 8    | 0.403 0.386 | 811 1069 373 791 996 312      | 2253 2099  | 2.82     | 0.2445694     | 2  | 0.96   | 0.84          | 1.09          | 0.86   | 0.72          | 1.03            |

Locus Alleles Chr Location Neighborhood  
rs2391406 T|G 13q33.3 106586873

| SUBSET   | Rank | MAF         | Geno Counts                   | Subjects   | score X2 | score p-value | df | het OR | het OR 95% CI | het OR 95% CI | hom OR | hom OR 95% CI | hom OR 95% CI_u |
|----------|------|-------------|-------------------------------|------------|----------|---------------|----|--------|---------------|---------------|--------|---------------|-----------------|
| STAGE1-3 | 11   | 0.370 0.364 | 4275 4832 1520 3852 4575 1220 | 10627 9647 | 14.55    | 0.0006935     | 2  | 1.05   | 0.99          | 1.12          | 0.89   | 0.82          | 0.97            |
| NHS      | 20   | 0.372 0.363 | 452 529 160 460 538 146       | 1141 1144  | 0.78     | 0.676152      | 2  | 1.00   | 0.84          | 1.19          | 0.90   | 0.69          | 1.16            |
| STAGE1-2 | 5    | 0.374 0.358 | 2234 2499 830 2289 2719 675   | 5563 5683  | 24.63    | 4.48E-06      | 2  | 1.06   | 0.98          | 1.15          | 0.79   | 0.71          | 0.89            |
| STAGE2   | 1    | 0.374 0.357 | 1782 1970 670 1829 2181 529   | 4422 4539  | 26.40    | 1.86E-06      | 2  | 1.08   | 0.99          | 1.18          | 0.77   | 0.67          | 0.88            |
| CPSII    | 4    | 0.371 0.333 | 217 240 79 228 251 51         | 536 530    | 6.52     | 0.0384739     | 2  | 1.00   | 0.77          | 1.29          | 0.61   | 0.41          | 0.91            |

|          |    |             |                             |           |      |           |   |      |      |      |      |      |      |
|----------|----|-------------|-----------------------------|-----------|------|-----------|---|------|------|------|------|------|------|
| PBCS1    | 2  | 0.387 0.374 | 195 230 81 242 351 74       | 506 667   | 8.64 | 0.0133309 | 2 | 1.23 | 0.96 | 1.58 | 0.74 | 0.51 | 1.06 |
| PLCO     | 2  | 0.376 0.350 | 398 416 157 393 445 109     | 971 947   | 9.37 | 0.0092273 | 2 | 1.08 | 0.89 | 1.31 | 0.70 | 0.53 | 0.93 |
| WHI      | 14 | 0.372 0.360 | 972 1084 353 966 1134 295   | 2409 2395 | 6.30 | 0.0429308 | 2 | 1.05 | 0.93 | 1.19 | 0.84 | 0.70 | 1.01 |
| STAGE3   | 19 | 0.367 0.372 | 2041 2337 690 1563 1858 545 | 5068 3966 | 0.70 | 0.7046814 | 2 | 1.04 | 0.95 | 1.14 | 1.03 | 0.91 | 1.17 |
| NHS2     | 3  | 0.344 0.386 | 510 503 148 219 279 86      | 1161 584  | 6.69 | 0.0352064 | 2 | 1.29 | 1.04 | 1.60 | 1.35 | 0.99 | 1.84 |
| NOR      | 8  | 0.366 0.372 | 207 214 74 201 245 69       | 495 515   | 1.96 | 0.375035  | 2 | 1.18 | 0.90 | 1.54 | 0.96 | 0.66 | 1.41 |
| PBCS2    | 22 | 0.380 0.382 | 656 853 236 542 686 203     | 1745 1431 | 0.41 | 0.8145846 | 2 | 0.97 | 0.84 | 1.13 | 1.04 | 0.84 | 1.30 |
| USRT     | 16 | 0.359 0.365 | 410 454 130 309 368 99      | 994 776   | 0.54 | 0.7632601 | 2 | 1.08 | 0.88 | 1.32 | 1.01 | 0.75 | 1.36 |
| WHS      | 2  | 0.384 0.345 | 258 313 102 292 280 88      | 673 660   | 4.84 | 0.0887661 | 2 | 0.79 | 0.63 | 1.00 | 0.76 | 0.55 | 1.06 |
| PBCS 1+2 | 16 | 0.381 0.379 | 851 1079 317 784 1035 277   | 2247 2096 | 1.11 | 0.5751503 | 2 | 1.04 | 0.92 | 1.18 | 0.95 | 0.79 | 1.14 |

Locus Alleles Chr Location Neighborhood  
rs2067980 A|G 5p12 45018074

| SUBSET   | Rank | MAF         | Geno Counts                 | Subjects   | score X2 | score p-value | df | het OR | het OR 95% CI | het OR 95% CI | hom OR | hom OR 95% CI | hom OR 95% CI_u |
|----------|------|-------------|-----------------------------|------------|----------|---------------|----|--------|---------------|---------------|--------|---------------|-----------------|
| STAGE1-3 | 12   | 0.159 0.173 | 7544 2828 285 6652 2704 318 | 10657 9674 | 13.14    | 0.0014041     | 2  | 1.08   | 1.02          | 1.15          | 1.27   | 1.07          | 1.49            |
| NHS      | 12   | 0.151 0.178 | 814 311 17 769 342 33       | 1142 1144  | 7.87     | 0.0195541     | 2  | 1.16   | 0.97          | 1.40          | 2.05   | 1.14          | 3.72            |
| STAGE1-2 | 4    | 0.151 0.174 | 4007 1455 114 3905 1597 189 | 5576 5691  | 25.31    | 3.18E-06      | 2  | 1.13   | 1.04          | 1.22          | 1.70   | 1.34          | 2.16            |
| STAGE2   | 7    | 0.151 0.172 | 3193 1144 97 3136 1255 156  | 4434 4547  | 17.99    | 1.24E-04      | 2  | 1.12   | 1.02          | 1.23          | 1.64   | 1.26          | 2.12            |
| CPSII    | 19   | 0.159 0.164 | 383 147 13 377 140 18       | 543 535    | 0.97     | 0.6171656     | 2  | 0.97   | 0.74          | 1.27          | 1.41   | 0.68          | 2.91            |
| PBCS1    | 5    | 0.191 0.227 | 335 149 22 400 234 35       | 506 669    | 5.06     | 0.0795413     | 2  | 1.32   | 1.02          | 1.69          | 1.33   | 0.77          | 2.32            |
| PLCO     | 11   | 0.144 0.166 | 714 241 20 658 265 25       | 975 948    | 3.60     | 0.1651977     | 2  | 1.19   | 0.97          | 1.46          | 1.36   | 0.75          | 2.47            |
| WHI      | 6    | 0.143 0.161 | 1761 607 42 1701 616 78     | 2410 2395  | 11.86    | 0.0026593     | 2  | 1.05   | 0.92          | 1.20          | 1.92   | 1.31          | 2.81            |
| STAGE3   | 17   | 0.169 0.172 | 3537 1374 171 2747 1110 129 | 5082 3986  | 0.80     | 0.6710681     | 2  | 1.04   | 0.95          | 1.14          | 0.97   | 0.77          | 1.23            |
| NHS2     | 18   | 0.170 0.156 | 810 306 44 411 145 17       | 1160 573   | 1.11     | 0.57395       | 2  | 0.93   | 0.74          | 1.18          | 0.76   | 0.43          | 1.35            |
| NOR      | 18   | 0.142 0.135 | 364 125 8 382 127 6         | 497 515    | 0.42     | 0.8122569     | 2  | 0.97   | 0.73          | 1.29          | 0.71   | 0.25          | 2.08            |
| PBCS2    | 20   | 0.190 0.192 | 1158 519 73 941 441 55      | 1750 1437  | 0.57     | 0.7527475     | 2  | 1.05   | 0.90          | 1.22          | 0.93   | 0.65          | 1.33            |
| USRT     | 4    | 0.155 0.177 | 713 256 26 530 216 29       | 995 775    | 3.20     | 0.071861      | 2  | 1.14   | 0.92          | 1.40          | 1.50   | 0.87          | 2.58            |
| WHS      | 17   | 0.153 0.164 | 492 168 20 483 181 22       | 680 686    | 0.64     | 0.7275251     | 2  | 1.10   | 0.86          | 1.40          | 1.12   | 0.60          | 2.08            |
| PBCS 1+2 | 7    | 0.190 0.203 | 1493 667 95 1341 672 90     | 2255 2103  | 3.01     | 0.2221966     | 2  | 1.12   | 0.98          | 1.28          | 1.05   | 0.78          | 1.42            |

Locus Alleles Chr Location Neighborhood  
rs12622050 G|A 2q11.2 100945886 NPAS2

| SUBSET   | Rank | MAF         | Geno Counts                 | Subjects   | score X2 | score p-value | df | het OR | het OR 95% CI | het OR 95% CI | hom OR | hom OR 95% CI | hom OR 95% CI_u |
|----------|------|-------------|-----------------------------|------------|----------|---------------|----|--------|---------------|---------------|--------|---------------|-----------------|
| STAGE1-3 | 13   | 0.223 0.212 | 6394 3731 508 6029 3163 462 | 10633 9654 | 12.49    | 0.0019418     | 2  | 0.90   | 0.85          | 0.95          | 0.96   | 0.85          | 1.10            |
| NHS      | 15   | 0.220 0.189 | 695 392 55 754 349 42       | 1142 1145  | 6.64     | 0.0362258     | 2  | 0.82   | 0.69          | 0.98          | 0.70   | 0.47          | 1.07            |
| STAGE1-2 | 13   | 0.220 0.201 | 3356 1980 239 3650 1790 248 | 5575 5688  | 20.95    | 2.83E-05      | 2  | 0.83   | 0.77          | 0.90          | 0.95   | 0.79          | 1.15            |
| STAGE2   | 9    | 0.221 0.204 | 2661 1588 184 2896 1441 206 | 4433 4543  | 16.97    | 2.07E-04      | 2  | 0.83   | 0.76          | 0.91          | 1.03   | 0.84          | 1.26            |
| CPSII    | 3    | 0.217 0.205 | 323 203 16 341 165 27       | 542 533    | 7.15     | 0.0280018     | 2  | 0.77   | 0.60          | 0.99          | 1.60   | 0.85          | 3.02            |
| PBCS1    | 13   | 0.244 0.239 | 284 197 25 391 235 42       | 506 668    | 2.31     | 0.3155159     | 2  | 0.87   | 0.68          | 1.11          | 1.22   | 0.73          | 2.05            |
| PLCO     | 7    | 0.229 0.199 | 577 350 48 606 307 35       | 975 948    | 5.18     | 0.074897      | 2  | 0.84   | 0.69          | 1.01          | 0.69   | 0.44          | 1.09            |
| WHI      | 11   | 0.213 0.196 | 1477 838 95 1558 734 102    | 2410 2394  | 9.24     | 0.009864      | 2  | 0.83   | 0.74          | 0.94          | 1.02   | 0.76          | 1.36            |
| STAGE3   | 24   | 0.226 0.227 | 3039 1753 269 2380 1375 213 | 5061 3968  | 0.01     | 0.9933009     | 2  | 1.00   | 0.92          | 1.09          | 1.01   | 0.84          | 1.22            |
| NHS2     | 14   | 0.205 0.202 | 734 358 56 359 188 21       | 1148 568   | 1.65     | 0.438149      | 2  | 1.07   | 0.86          | 1.33          | 0.77   | 0.46          | 1.29            |
| NOR      | 15   | 0.221 0.219 | 297 179 20 314 175 25       | 496 514    | 0.75     | 0.686192      | 2  | 0.92   | 0.71          | 1.20          | 1.18   | 0.64          | 2.17            |
| PBCS2    | 23   | 0.252 0.258 | 980 644 117 793 540 99      | 1741 1432  | 0.27     | 0.8741338     | 2  | 1.04   | 0.89          | 1.20          | 1.05   | 0.79          | 1.39            |
| USRT     | 13   | 0.206 0.205 | 626 327 41 495 242 38       | 994 775    | 1.02     | 0.5992779     | 2  | 0.94   | 0.76          | 1.15          | 1.17   | 0.74          | 1.85            |
| WHS      | 15   | 0.231 0.214 | 402 245 35 419 230 30       | 682 679    | 1.20     | 0.5477966     | 2  | 0.90   | 0.72          | 1.13          | 0.82   | 0.50          | 1.36            |
| PBCS 1+2 | 21   | 0.250 0.252 | 1263 839 142 1183 773 142   | 2244 2098  | 0.41     | 0.8146656     | 2  | 0.98   | 0.87          | 1.12          | 1.07   | 0.84          | 1.37            |

Locus Alleles Chr Location Neighborhood  
rs17740709 A|G 12q21.31 81947471 TMTC2

| SUBSET   | Rank | MAF         | Geno Counts                 | Subjects   | score X2 | score p-value | df | het OR | het OR 95% CI | het OR 95% CI | hom OR | hom OR 95% CI | hom OR 95% CI_u |
|----------|------|-------------|-----------------------------|------------|----------|---------------|----|--------|---------------|---------------|--------|---------------|-----------------|
| STAGE1-3 | 14   | 0.220 0.214 | 6450 3688 498 6023 3139 502 | 10636 9664 | 12.27    | 0.0021665     | 2  | 0.91   | 0.86          | 0.97          | 1.08   | 0.95          | 1.23            |
| NHS      | 16   | 0.218 0.212 | 692 402 48 725 355 65       | 1142 1145  | 6.24     | 0.0441523     | 2  | 0.84   | 0.71          | 1.01          | 1.29   | 0.88          | 1.90            |

|          |    |             |                             |           |       |           |   |      |      |      |      |      |      |
|----------|----|-------------|-----------------------------|-----------|-------|-----------|---|------|------|------|------|------|------|
| STAGE1-2 | 9  | 0.218 0.214 | 3372 1979 225/3566 1821 305 | 5576 5692 | 22.88 | 1.08E-05  | 2 | 0.87 | 0.80 | 0.94 | 1.28 | 1.07 | 1.53 |
| STAGE2   | 11 | 0.218 0.214 | 2680 1577 177/2841 1466 240 | 4434 4547 | 16.84 | 2.20E-04  | 2 | 0.88 | 0.80 | 0.96 | 1.28 | 1.05 | 1.56 |
| CPSII    | 11 | 0.215 0.200 | 328 197 18/343 170 22       | 543 535   | 2.66  | 0.2641503 | 2 | 0.83 | 0.64 | 1.06 | 1.17 | 0.62 | 2.22 |
| PBCS1    | 6  | 0.242 0.247 | 282 203 21/383 241 45       | 506 669   | 4.80  | 0.0907257 | 2 | 0.87 | 0.69 | 1.11 | 1.58 | 0.92 | 2.71 |
| PLCO     | 18 | 0.214 0.203 | 603 326 46/610 291 47       | 975 948   | 1.66  | 0.4365307 | 2 | 0.88 | 0.73 | 1.07 | 1.01 | 0.66 | 1.54 |
| WHI      | 8  | 0.215 0.212 | 1467 851 92/1505 764 126    | 2410 2395 | 10.43 | 0.0054383 | 2 | 0.88 | 0.78 | 0.99 | 1.34 | 1.01 | 1.76 |
| STAGE3   | 13 | 0.223 0.216 | 3078 1710 273/2458 1320 197 | 5061 3975 | 1.42  | 0.4910468 | 2 | 0.97 | 0.88 | 1.06 | 0.90 | 0.75 | 1.09 |
| NHS2     | 17 | 0.211 0.207 | 723 368 59/356 190 23       | 1150 569  | 1.18  | 0.5549247 | 2 | 1.05 | 0.84 | 1.30 | 0.79 | 0.48 | 1.30 |
| NOR      | 4  | 0.243 0.205 | 281 187 27/328 161 25       | 495 514   | 5.29  | 0.0709768 | 2 | 0.74 | 0.57 | 0.96 | 0.79 | 0.45 | 1.40 |
| PBCS2    | 18 | 0.234 0.240 | 1042 597 112/836 508 91     | 1751 1435 | 0.60  | 0.7404818 | 2 | 1.06 | 0.91 | 1.23 | 1.01 | 0.76 | 1.36 |
| USRT     | 11 | 0.212 0.195 | 612 339 41/501 250 27       | 992 778   | 1.55  | 0.460736  | 2 | 0.90 | 0.74 | 1.10 | 0.80 | 0.49 | 1.33 |
| WHS      | 19 | 0.213 0.201 | 420 219 34/437 211 31       | 673 679   | 0.60  | 0.7415942 | 2 | 0.93 | 0.73 | 1.17 | 0.88 | 0.53 | 1.45 |
| PBCS 1+2 | 19 | 0.236 0.243 | 1324 799 133/1218 747 136   | 2256 2101 | 0.69  | 0.7084379 | 2 | 1.02 | 0.90 | 1.15 | 1.11 | 0.86 | 1.43 |

Locus Alleles Chr Location Neighborhood  
rs1274466 T|C 10p11.21 34510210 PARD3

| SUBSET   | Rank | MAF         | Geno Counts                   | Subjects   | score X2 | score p-value | df | het OR | het OR 95% CI | het OR 95% CI | hom OR | hom OR 95% I | hom OR 95% CI_u |
|----------|------|-------------|-------------------------------|------------|----------|---------------|----|--------|---------------|---------------|--------|--------------|-----------------|
| STAGE1-3 | 15   | 0.449 0.432 | 3262 5237 2175/3133 4725 1825 | 10674 9683 | 11.33    | 0.0034729     | 2  | 0.94   | 0.88          | 1.00          | 0.87   | 0.81         | 0.95            |
| NHS      | 17   | 0.470 0.439 | 312 586 244/357 569 218       | 1142 1144  | 4.74     | 0.0935471     | 2  | 0.85   | 0.70          | 1.03          | 0.78   | 0.62         | 0.99            |
| STAGE1-2 | 19   | 0.456 0.430 | 1656 2757 1163/1852 2785 1053 | 5576 5690  | 15.40    | 0.0004527     | 2  | 0.90   | 0.83          | 0.98          | 0.81   | 0.73         | 0.90            |
| STAGE2   | 18   | 0.452 0.427 | 1344 2171 919/1495 2216 835   | 4434 4546  | 11.12    | 0.0038476     | 2  | 0.92   | 0.83          | 1.01          | 0.82   | 0.73         | 0.92            |
| CPSII    | 12   | 0.471 0.436 | 152 271 120/172 259 104       | 543 535    | 2.59     | 0.273912      | 2  | 0.84   | 0.64          | 1.11          | 0.77   | 0.54         | 1.08            |
| PBCS1    | 8    | 0.483 0.446 | 138 247 121/200 340 128       | 506 668    | 4.03     | 0.1335787     | 2  | 0.95   | 0.72          | 1.25          | 0.73   | 0.52         | 1.02            |
| PLCO     | 10   | 0.449 0.419 | 298 478 199/319 464 165       | 975 948    | 3.72     | 0.1556509     | 2  | 0.91   | 0.74          | 1.11          | 0.77   | 0.60         | 1.00            |
| WHI      | 23   | 0.443 0.424 | 756 1175 479/804 1153 438     | 2410 2395  | 3.47     | 0.1762956     | 2  | 0.92   | 0.81          | 1.05          | 0.86   | 0.73         | 1.01            |
| STAGE3   | 20   | 0.442 0.436 | 1606 2484 1013/1282 1942 774  | 5103 3998  | 0.53     | 0.7671647     | 2  | 0.98   | 0.89          | 1.08          | 0.96   | 0.85         | 1.08            |
| NHS2     | 20   | 0.441 0.435 | 379 559 240/186 286 110       | 1178 582   | 0.66     | 0.7182904     | 2  | 1.04   | 0.83          | 1.31          | 0.93   | 0.70         | 1.24            |
| NOR      | 19   | 0.391 0.401 | 184 235 76/188 240 86         | 495 514    | 0.36     | 0.837247      | 2  | 1.00   | 0.76          | 1.31          | 1.11   | 0.77         | 1.60            |
| PBCS2    | 8    | 0.457 0.441 | 518 863 368/456 695 287       | 1749 1438  | 1.75     | 0.4174939     | 2  | 0.91   | 0.78          | 1.07          | 0.89   | 0.73         | 1.08            |
| USRT     | 19   | 0.454 0.444 | 295 489 205/243 378 156       | 989 777    | 0.44     | 0.8005663     | 2  | 0.94   | 0.76          | 1.17          | 0.92   | 0.71         | 1.21            |
| WHS      | 12   | 0.423 0.446 | 230 338 124/209 343 135       | 692 687    | 1.49     | 0.474654      | 2  | 1.12   | 0.88          | 1.42          | 1.20   | 0.88         | 1.63            |
| PBCS 1+2 | 5    | 0.463 0.442 | 656 1106 488/655 1033 413     | 2250 2101  | 3.64     | 0.1622741     | 2  | 0.94   | 0.82          | 1.07          | 0.85   | 0.72         | 1.00            |

Locus Alleles Chr Location Neighborhood  
rs10941679 A|G 5p12 44742255

| SUBSET   | Rank | MAF         | Geno Counts                 | Subjects  | score X2 | score p-value | df | het OR | het OR 95% CI | het OR 95% CI | hom OR | hom OR 95% I | hom OR 95% CI_u |
|----------|------|-------------|-----------------------------|-----------|----------|---------------|----|--------|---------------|---------------|--------|--------------|-----------------|
| STAGE1-3 | 16   | 0.259 0.279 | 3047 2125 374/2387 1867 353 | 5546 4607 | 10.69    | 0.0047697     | 2  | 1.12   | 1.03          | 1.22          | 1.20   | 1.03         | 1.41            |
| STAGE3   | 2    | 0.259 0.277 | 2791 1931 347/2070 1609 297 | 5069 3976 | 8.15     | 0.016966      | 2  | 1.12   | 1.03          | 1.23          | 1.15   | 0.98         | 1.36            |
| NHS2     | 12   | 0.255 0.277 | 637 430 76/301 228 45       | 1143 574  | 1.97     | 0.3741036     | 2  | 1.12   | 0.91          | 1.39          | 1.25   | 0.85         | 1.86            |
| NOR      | 12   | 0.303 0.282 | 239 213 44/265 210 40       | 496 515   | 1.20     | 0.5498078     | 2  | 0.89   | 0.69          | 1.15          | 0.82   | 0.52         | 1.30            |
| PBCS2    | 2    | 0.259 0.276 | 969 667 121/737 605 94      | 1757 1436 | 5.75     | 0.0564235     | 2  | 1.19   | 1.03          | 1.38          | 1.02   | 0.77         | 1.36            |
| USRT     | 1    | 0.236 0.290 | 575 373 49/395 307 71       | 997 773   | 15.75    | 0.000381      | 2  | 1.20   | 0.98          | 1.46          | 2.11   | 1.43         | 3.10            |
| WHS      | 16   | 0.268 0.260 | 371 248 57/372 259 47       | 676 678   | 1.20     | 0.5491983     | 2  | 1.04   | 0.83          | 1.31          | 0.82   | 0.54         | 1.24            |
| PBCS 1+2 | 2    | 0.259 0.281 | 1225 861 148/1054 863 150   | 2234 2067 | 6.37     | 0.0413437     | 2  | 1.16   | 1.03          | 1.32          | 1.18   | 0.93         | 1.50            |

Locus Alleles Chr Location Neighborhood  
rs9491859 C|A 6q22.33 128106056 C6orf190

| SUBSET   | Rank | MAF         | Geno Counts                   | Subjects   | score X2 | score p-value | df | het OR | het OR 95% CI | het OR 95% CI | hom OR | hom OR 95% I | hom OR 95% CI_u |
|----------|------|-------------|-------------------------------|------------|----------|---------------|----|--------|---------------|---------------|--------|--------------|-----------------|
| STAGE1-3 | 17   | 0.355 0.369 | 4448 4846 1351/3883 4411 1360 | 10645 9654 | 10.43    | 0.0054263     | 2  | 1.04   | 0.98          | 1.11          | 1.15   | 1.06         | 1.26            |
| NHS      | 13   | 0.356 0.381 | 459 552 130/447 523 175       | 1141 1145  | 7.57     | 0.0226676     | 2  | 0.97   | 0.82          | 1.16          | 1.38   | 1.06         | 1.80            |
| STAGE1-2 | 6    | 0.348 0.374 | 2351 2569 655/2284 2560 846   | 5575 5690  | 24.12    | 5.79E-06      | 2  | 1.03   | 0.95          | 1.11          | 1.33   | 1.18         | 1.49            |
| STAGE2   | 8    | 0.346 0.372 | 1892 2017 525/1837 2037 671   | 4434 4545  | 17.36    | 1.70E-04      | 2  | 1.04   | 0.95          | 1.14          | 1.32   | 1.15         | 1.50            |
| CPSII    | 10   | 0.350 0.339 | 220 266 57/238 231 66         | 543 535    | 3.77     | 0.1517086     | 2  | 0.80   | 0.62          | 1.04          | 1.07   | 0.72         | 1.60            |
| PBCS1    | 17   | 0.345 0.356 | 216 231 59/287 287 94         | 506 668    | 1.76     | 0.414439      | 2  | 0.94   | 0.73          | 1.20          | 1.20   | 0.83         | 1.74            |

|          |    |             |                             |           |       |           |   |      |      |      |      |      |      |
|----------|----|-------------|-----------------------------|-----------|-------|-----------|---|------|------|------|------|------|------|
| PLCO     | 4  | 0.333 0.374 | 437 427 111 378 430 140     | 975 948   | 7.25  | 0.0265879 | 2 | 1.16 | 0.96 | 1.41 | 1.46 | 1.10 | 1.94 |
| WHI      | 7  | 0.350 0.382 | 1019 1093 298 934 1089 371  | 2410 2394 | 11.62 | 0.0029986 | 2 | 1.09 | 0.96 | 1.23 | 1.36 | 1.14 | 1.62 |
| STAGE3   | 10 | 0.362 0.363 | 2098 2281 696 1600 1852 514 | 5075 3966 | 2.98  | 0.2253374 | 2 | 1.06 | 0.97 | 1.16 | 0.97 | 0.85 | 1.10 |
| NHS2     | 24 | 0.367 0.365 | 482 523 170 238 257 82      | 1175 577  | 0.02  | 0.9887474 | 2 | 1.00 | 0.80 | 1.23 | 0.98 | 0.72 | 1.33 |
| NOR      | 14 | 0.372 0.371 | 200 212 75 200 232 70       | 487 502   | 0.85  | 0.6550764 | 2 | 1.09 | 0.84 | 1.43 | 0.93 | 0.64 | 1.37 |
| PBCS2    | 15 | 0.349 0.349 | 744 779 218 599 660 169     | 1741 1428 | 0.79  | 0.6726085 | 2 | 1.05 | 0.91 | 1.22 | 0.96 | 0.77 | 1.21 |
| USRT     | 17 | 0.374 0.366 | 391 459 141 311 366 102     | 991 779   | 0.47  | 0.7888255 | 2 | 1.00 | 0.82 | 1.23 | 0.91 | 0.68 | 1.22 |
| WHS      | 6  | 0.361 0.382 | 281 308 92 252 337 91       | 681 680   | 2.89  | 0.2361627 | 2 | 1.22 | 0.97 | 1.54 | 1.10 | 0.79 | 1.54 |
| PBCS 1+2 | 24 | 0.348 0.351 | 959 1006 277 885 946 263    | 2242 2094 | 0.13  | 0.9392524 | 2 | 1.02 | 0.90 | 1.16 | 1.03 | 0.85 | 1.25 |

Locus Alleles Chr Location Neighborhood  
rs724244 C|T 3p24.1 27217157 NEK10

| SUBSET   | Rank | MAF         | Geno Counts                 | Subjects  | score X2 | score p-value | df | het OR | het OR 95% CI | het OR 95% CI | hom OR | hom OR 95% CI | hom OR 95% CI_u |
|----------|------|-------------|-----------------------------|-----------|----------|---------------|----|--------|---------------|---------------|--------|---------------|-----------------|
| STAGE1-3 | 18   | 0.261 0.275 | 5213 3644 662/4497 3397 649 | 9519 8543 | 8.88     | 0.0118129     | 2  | 1.08   | 1.02          | 1.15          | 1.14   | 1.01          | 1.28            |
| STAGE1-2 | 15   | 0.252 0.281 | 2473 1688 272/2354 1826 363 | 4433 4543 | 20.05    | 4.43E-05      | 2  | 1.14   | 1.04          | 1.24          | 1.40   | 1.19          | 1.66            |
| STAGE2   | 4    | 0.252 0.281 | 2473 1688 272/2354 1826 363 | 4433 4543 | 20.05    | 4.43E-05      | 2  | 1.14   | 1.04          | 1.24          | 1.40   | 1.19          | 1.66            |
| CPSII    | 14   | 0.247 0.273 | 309 198 35/287 202 45       | 542 534   | 2.04     | 0.360106      | 2  | 1.10   | 0.85          | 1.42          | 1.38   | 0.87          | 2.21            |
| PBCS1    | 19   | 0.246 0.265 | 293 177 36/368 245 54       | 506 667   | 0.99     | 0.6102575     | 2  | 1.10   | 0.86          | 1.41          | 1.19   | 0.76          | 1.87            |
| PLCO     | 1    | 0.230 0.291 | 569 364 42/481 381 85       | 975 947   | 21.92    | 1.74E-05      | 2  | 1.24   | 1.03          | 1.49          | 2.39   | 1.62          | 3.53            |
| WHI      | 21   | 0.263 0.283 | 1302 949 159/1218 998 179   | 2410 2395 | 5.17     | 0.0754023     | 2  | 1.12   | 1.00          | 1.27          | 1.20   | 0.96          | 1.51            |
| STAGE3   | 15   | 0.269 0.268 | 2740 1960 390/2144 1572 286 | 5090 4002 | 1.17     | 0.555987      | 2  | 1.03   | 0.94          | 1.12          | 0.94   | 0.80          | 1.10            |
| NHS2     | 9    | 0.270 0.283 | 638 417 105/302 231 49      | 1160 582  | 2.33     | 0.3120437     | 2  | 1.17   | 0.95          | 1.45          | 0.99   | 0.68          | 1.42            |
| NOR      | 16   | 0.248 0.264 | 276 192 27/278 204 34       | 495 516   | 0.74     | 0.6913383     | 2  | 1.05   | 0.82          | 1.37          | 1.25   | 0.73          | 2.13            |
| PBCS2    | 10   | 0.273 0.261 | 926 696 131/778 567 92      | 1753 1437 | 1.56     | 0.457632      | 2  | 0.97   | 0.84          | 1.12          | 0.84   | 0.63          | 1.11            |
| USRT     | 21   | 0.273 0.267 | 524 397 73/418 302 56       | 994 776   | 0.23     | 0.8899207     | 2  | 0.95   | 0.78          | 1.16          | 0.96   | 0.66          | 1.39            |
| WHS      | 23   | 0.266 0.274 | 376 258 54/368 268 55       | 688 691   | 0.28     | 0.8698866     | 2  | 1.06   | 0.85          | 1.33          | 1.04   | 0.70          | 1.56            |
| PBCS 1+2 | 22   | 0.267 0.262 | 1219 869 167/1145 811 146   | 2255 2102 | 0.36     | 0.837175      | 2  | 0.99   | 0.88          | 1.13          | 0.93   | 0.73          | 1.18            |

Locus Alleles Chr Location Neighborhood  
rs7936636 C|T 11p11.2 44397546

| SUBSET   | Rank | MAF         | Geno Counts                 | Subjects   | score X2 | score p-value | df | het OR | het OR 95% CI | het OR 95% CI | hom OR | hom OR 95% CI | hom OR 95% CI_u |
|----------|------|-------------|-----------------------------|------------|----------|---------------|----|--------|---------------|---------------|--------|---------------|-----------------|
| STAGE1-3 | 19   | 0.255 0.245 | 5896 4093 666/5545 3548 599 | 10655 9692 | 7.63     | 0.0220495     | 2  | 0.92   | 0.87          | 0.98          | 0.96   | 0.85          | 1.07            |
| NHS      | 18   | 0.256 0.240 | 635 430 77/673 395 77       | 1142 1145  | 2.58     | 0.2745981     | 2  | 0.87   | 0.73          | 1.03          | 0.94   | 0.68          | 1.32            |
| STAGE1-2 | 10   | 0.263 0.242 | 3003 2205 365/3307 2014 370 | 5573 5691  | 22.09    | 1.59E-05      | 2  | 0.83   | 0.77          | 0.90          | 0.92   | 0.79          | 1.07            |
| STAGE2   | 5    | 0.265 0.243 | 2368 1775 288/2634 1619 293 | 4431 4546  | 19.89    | 4.80E-05      | 2  | 0.82   | 0.75          | 0.89          | 0.91   | 0.77          | 1.09            |
| CPSII    | 1    | 0.266 0.233 | 286 224 32/323 175 37       | 542 535    | 8.58     | 0.0136866     | 2  | 0.69   | 0.54          | 0.89          | 1.02   | 0.62          | 1.69            |
| PBCS1    | 11   | 0.247 0.226 | 284 193 28/406 222 40       | 505 668    | 3.13     | 0.2096069     | 2  | 0.80   | 0.63          | 1.03          | 1.00   | 0.60          | 1.66            |
| PLCO     | 9    | 0.263 0.249 | 526 385 64/546 332 70       | 975 948    | 4.18     | 0.1236109     | 2  | 0.83   | 0.69          | 1.00          | 1.05   | 0.74          | 1.51            |
| WHI      | 12   | 0.270 0.247 | 1272 973 164/1359 890 146   | 2409 2395  | 7.58     | 0.022606      | 2  | 0.86   | 0.76          | 0.96          | 0.83   | 0.66          | 1.05            |
| STAGE3   | 12   | 0.245 0.249 | 2893 1888 301/2238 1535 228 | 5082 4001  | 1.46     | 0.4822715     | 2  | 1.05   | 0.96          | 1.15          | 0.98   | 0.82          | 1.17            |
| NHS2     | 7    | 0.264 0.235 | 630 457 79/344 206 34       | 1166 584   | 3.79     | 0.1506085     | 2  | 0.83   | 0.67          | 1.02          | 0.79   | 0.52          | 1.20            |
| NOR      | 2    | 0.192 0.237 | 326 153 19/301 185 30       | 498 516    | 6.18     | 0.0455428     | 2  | 1.31   | 1.00          | 1.71          | 1.71   | 0.94          | 3.10            |
| PBCS2    | 3    | 0.245 0.264 | 993 643 105/769 569 94      | 1741 1432  | 3.54     | 0.1699222     | 2  | 1.14   | 0.99          | 1.32          | 1.16   | 0.86          | 1.55            |
| USRT     | 7    | 0.254 0.240 | 553 376 64/442 301 37       | 993 780    | 2.35     | 0.3081093     | 2  | 1.00   | 0.82          | 1.22          | 0.72   | 0.47          | 1.10            |
| WHS      | 20   | 0.239 0.247 | 391 259 34/382 274 33       | 684 689    | 0.52     | 0.7696459     | 2  | 1.08   | 0.87          | 1.35          | 0.99   | 0.60          | 1.64            |
| PBCS 1+2 | 20   | 0.245 0.252 | 1277 836 133/1175 790 135   | 2246 2100  | 0.66     | 0.720599      | 2  | 1.03   | 0.91          | 1.16          | 1.10   | 0.86          | 1.42            |

Locus Alleles Chr Location Neighborhood  
rs12608723 A|G 19q13.11 38508973

| SUBSET   | Rank | MAF         | Geno Counts                 | Subjects   | score X2 | score p-value | df | het OR | het OR 95% CI | het OR 95% CI | hom OR | hom OR 95% CI | hom OR 95% CI_u |
|----------|------|-------------|-----------------------------|------------|----------|---------------|----|--------|---------------|---------------|--------|---------------|-----------------|
| STAGE1-3 | 20   | 0.136 0.128 | 7995 2464 224/7377 2145 166 | 10683 9688 | 6.97     | 0.0307039     | 2  | 0.94   | 0.88          | 1.01          | 0.80   | 0.66          | 0.98            |
| NHS      | 9    | 0.153 0.123 | 819 296 27/877 252 15       | 1142 1144  | 8.94     | 0.0114292     | 2  | 0.80   | 0.66          | 0.96          | 0.52   | 0.27          | 0.98            |
| STAGE1-2 | 20   | 0.143 0.126 | 4103 1351 122/4355 1242 94  | 5576 5691  | 14.55    | 0.0006935     | 2  | 0.87   | 0.79          | 0.95          | 0.73   | 0.55          | 0.95            |
| STAGE2   | 21   | 0.140 0.126 | 3284 1055 95/3478 990 79    | 4434 4547  | 7.68     | 0.0214665     | 2  | 0.89   | 0.80          | 0.98          | 0.79   | 0.58          | 1.06            |



|          |    |             |                           |           |      |           |   |      |      |      |      |      |      |
|----------|----|-------------|---------------------------|-----------|------|-----------|---|------|------|------|------|------|------|
| CPSII    | 8  | 0.140 0.120 | 398 138 7 417 108 10      | 543 535   | 4.57 | 0.1016837 | 2 | 0.75 | 0.56 | 1.00 | 1.36 | 0.51 | 3.62 |
| PBCS1    | 12 | 0.153 0.129 | 364 129 13 510 146 13     | 506 669   | 2.88 | 0.2365134 | 2 | 0.81 | 0.62 | 1.06 | 0.71 | 0.33 | 1.56 |
| PLCO     | 21 | 0.132 0.124 | 738 216 21 732 196 20     | 975 948   | 0.64 | 0.7258641 | 2 | 0.91 | 0.74 | 1.14 | 0.96 | 0.52 | 1.79 |
| WHI      | 22 | 0.141 0.128 | 1784 572 54 1819 540 36   | 2410 2395 | 4.81 | 0.0900816 | 2 | 0.93 | 0.81 | 1.06 | 0.65 | 0.43 | 1.00 |
| STAGE3   | 14 | 0.129 0.132 | 3894 1116 102 3022 909 72 | 5112 4003 | 1.37 | 0.5043512 | 2 | 1.05 | 0.95 | 1.16 | 0.91 | 0.67 | 1.23 |
| NHS2     | 19 | 0.127 0.122 | 907 259 21 453 118 12     | 1187 583  | 0.72 | 0.6983545 | 2 | 0.91 | 0.71 | 1.17 | 1.14 | 0.56 | 2.35 |
| NOR      | 1  | 0.128 0.167 | 380 103 12 356 148 12     | 495 516   | 8.42 | 0.0148629 | 2 | 1.53 | 1.15 | 2.05 | 1.07 | 0.47 | 2.41 |
| PBCS2    | 14 | 0.124 0.118 | 1344 368 32 1120 300 20   | 1744 1440 | 1.04 | 0.5947072 | 2 | 0.98 | 0.82 | 1.16 | 0.75 | 0.43 | 1.32 |
| USRT     | 22 | 0.138 0.142 | 736 239 17 573 191 15     | 992 779   | 0.16 | 0.9208256 | 2 | 1.03 | 0.82 | 1.28 | 1.13 | 0.56 | 2.29 |
| WHS      | 11 | 0.135 0.130 | 527 147 20 520 152 13     | 694 685   | 1.56 | 0.4591885 | 2 | 1.05 | 0.81 | 1.36 | 0.66 | 0.32 | 1.34 |
| PBCS 1+2 | 10 | 0.130 0.120 | 1706 494 45 1630 440 33   | 2245 2103 | 2.06 | 0.3562417 | 2 | 0.93 | 0.81 | 1.08 | 0.77 | 0.49 | 1.21 |

Locus rs37936 Alleles A|G Chr 7q21.11 Location Neighborhood 79806994

| SUBSET   | Rank | MAF         | Geno Counts                   | Subjects   | score X2 | score p-value | df | het OR | het OR 95% CI | het OR 95% CI | hom OR | hom OR 95% CI | hom OR 95% CI_u |
|----------|------|-------------|-------------------------------|------------|----------|---------------|----|--------|---------------|---------------|--------|---------------|-----------------|
| STAGE1-3 | 21   | 0.384 0.372 | 4045 4861 1609 3800 4343 1365 | 10515 9508 | 6.19     | 0.0451702     | 2  | 0.95   | 0.90          | 1.01          | 0.90   | 0.83          | 0.98            |
| NHS      | 8    | 0.400 0.365 | 403 541 178 474 476 171       | 1122 1121  | 10.04    | 0.0065968     | 2  | 0.75   | 0.62          | 0.90          | 0.82   | 0.64          | 1.05            |
| STAGE1-2 | 18   | 0.399 0.369 | 1839 2287 833 1982 2203 705   | 4959 4890  | 17.09    | 1.94E-04      | 2  | 0.89   | 0.82          | 0.97          | 0.79   | 0.70          | 0.88            |
| STAGE2   | 16   | 0.398 0.371 | 1436 1746 655 1508 1727 534   | 3837 3769  | 13.57    | 0.0011297     | 2  | 0.94   | 0.85          | 1.04          | 0.78   | 0.68          | 0.89            |
| CPSII    | 20   | 0.387 0.373 | 199 251 79 202 249 70         | 529 521    | 0.51     | 0.7736987     | 2  | 0.98   | 0.75          | 1.27          | 0.87   | 0.60          | 1.27            |
| PLCO     | 20   | 0.378 0.376 | 379 431 146 373 394 147       | 956 914    | 0.77     | 0.6812162     | 2  | 0.93   | 0.76          | 1.13          | 1.02   | 0.78          | 1.34            |
| WHI      | 1    | 0.409 0.368 | 858 1064 430 933 1084 317     | 2352 2334  | 20.35    | 3.81E-05      | 2  | 0.94   | 0.83          | 1.06          | 0.68   | 0.57          | 0.81            |
| STAGE3   | 21   | 0.372 0.377 | 2013 2359 714 1563 1857 577   | 5086 3997  | 0.38     | 0.8270998     | 2  | 1.01   | 0.93          | 1.11          | 1.04   | 0.92          | 1.18            |
| NHS2     | 10   | 0.371 0.396 | 475 529 171 222 272 99        | 1175 593   | 2.14     | 0.34318       | 2  | 1.10   | 0.89          | 1.37          | 1.24   | 0.92          | 1.66            |
| NOR      | 13   | 0.364 0.345 | 202 227 67 221 233 61         | 496 515    | 0.86     | 0.6517564     | 2  | 0.94   | 0.72          | 1.22          | 0.83   | 0.56          | 1.24            |
| PBCS2    | 6    | 0.368 0.364 | 706 782 248 568 669 183       | 1736 1420  | 1.93     | 0.3809034     | 2  | 1.06   | 0.91          | 1.24          | 0.92   | 0.74          | 1.14            |
| USRT     | 6    | 0.393 0.403 | 356 496 143 283 364 132       | 995 779    | 2.78     | 0.2489003     | 2  | 0.92   | 0.75          | 1.14          | 1.16   | 0.87          | 1.54            |
| WHS      | 10   | 0.362 0.379 | 274 325 85 269 319 102        | 684 690    | 1.62     | 0.4445855     | 2  | 1.00   | 0.80          | 1.26          | 1.22   | 0.88          | 1.71            |
| PBCS 1+2 | 12   | 0.367 0.364 | 899 997 310 823 952 266       | 2206 2041  | 1.35     | 0.5101837     | 2  | 1.04   | 0.92          | 1.19          | 0.94   | 0.78          | 1.13            |

Locus rs3817198 Alleles T|C Chr 11p15.5 Location Neighborhood 1865582 LSP1

| SUBSET   | Rank | MAF         | Geno Counts                   | Subjects   | score X2 | score p-value | df | het OR | het OR 95% CI | het OR 95% CI | hom OR | hom OR 95% CI | hom OR 95% CI_u |
|----------|------|-------------|-------------------------------|------------|----------|---------------|----|--------|---------------|---------------|--------|---------------|-----------------|
| STAGE1-3 | 22   | 0.323 0.333 | 4881 4670 1113 4350 4237 1105 | 10664 9692 | 5.22     | 0.0734482     | 2  | 1.02   | 0.96          | 1.08          | 1.11   | 1.02          | 1.22            |
| NHS      | 19   | 0.318 0.330 | 524 510 108 514 505 125       | 1142 1144  | 1.36     | 0.5067274     | 2  | 1.01   | 0.85          | 1.20          | 1.18   | 0.89          | 1.57            |
| STAGE1-2 | 23   | 0.326 0.341 | 2533 2438 597 2485 2518 677   | 5568 5680  | 5.66     | 0.0590306     | 2  | 1.05   | 0.97          | 1.14          | 1.16   | 1.02          | 1.31            |
| STAGE2   | 23   | 0.328 0.344 | 2009 1928 489 1971 2013 552   | 4426 4536  | 4.66     | 0.0973278     | 2  | 1.06   | 0.97          | 1.16          | 1.15   | 1.00          | 1.32            |
| CPSII    | 22   | 0.334 0.345 | 243 231 64 235 227 70         | 538 532    | 0.40     | 0.8171561     | 2  | 1.02   | 0.79          | 1.31          | 1.13   | 0.77          | 1.66            |
| PBCS1    | 21   | 0.319 0.333 | 229 228 47 292 299 71         | 504 662    | 0.67     | 0.7163528     | 2  | 1.03   | 0.81          | 1.31          | 1.18   | 0.79          | 1.78            |
| PLCO     | 8    | 0.335 0.344 | 440 417 118 397 449 101       | 975 947    | 4.30     | 0.1162417     | 2  | 1.19   | 0.99          | 1.44          | 0.95   | 0.70          | 1.28            |
| WHI      | 18   | 0.326 0.346 | 1097 1052 260 1047 1038 310   | 2409 2395  | 5.61     | 0.0606571     | 2  | 1.03   | 0.92          | 1.17          | 1.25   | 1.04          | 1.50            |
| STAGE3   | 16   | 0.320 0.322 | 2347 2233 516 1859 1722 429   | 5096 4010  | 1.15     | 0.5625916     | 2  | 0.97   | 0.89          | 1.06          | 1.05   | 0.91          | 1.21            |
| NHS2     | 15   | 0.320 0.314 | 538 516 117 285 246 64        | 1171 595   | 1.23     | 0.5418341     | 2  | 0.90   | 0.73          | 1.11          | 1.03   | 0.74          | 1.45            |
| NOR      | 6    | 0.262 0.290 | 269 194 33 258 215 42         | 496 515    | 2.03     | 0.3621332     | 2  | 1.16   | 0.89          | 1.50          | 1.33   | 0.82          | 2.16            |
| PBCS2    | 12   | 0.330 0.339 | 789 789 189 634 637 171       | 1767 1442  | 1.08     | 0.5824104     | 2  | 1.00   | 0.87          | 1.16          | 1.13   | 0.89          | 1.42            |
| USRT     | 10   | 0.338 0.317 | 442 434 119 366 331 81        | 995 778    | 1.70     | 0.4267614     | 2  | 0.92   | 0.75          | 1.12          | 0.82   | 0.60          | 1.13            |
| WHS      | 13   | 0.312 0.320 | 309 300 58 316 293 71         | 667 680    | 1.35     | 0.5102345     | 2  | 0.96   | 0.76          | 1.20          | 1.20   | 0.82          | 1.75            |
| PBCS 1+2 | 13   | 0.328 0.336 | 1019 1016 236 932 933 241     | 2271 2106  | 1.25     | 0.5357023     | 2  | 1.00   | 0.89          | 1.14          | 1.12   | 0.91          | 1.36            |

Locus rs11077820 Alleles T|C Chr 17q25.1 Location Neighborhood 71966263 UBE2O, AANAT

| SUBSET   | Rank | MAF         | Geno Counts                   | Subjects   | score X2 | score p-value | df | het OR | het OR 95% CI | het OR 95% CI | hom OR | hom OR 95% CI | hom OR 95% CI_u |
|----------|------|-------------|-------------------------------|------------|----------|---------------|----|--------|---------------|---------------|--------|---------------|-----------------|
| STAGE1-3 | 23   | 0.370 0.365 | 4214 4964 1454 3948 4367 1348 | 10632 9663 | 4.62     | 0.0992576     | 2  | 0.94   | 0.88          | 1.00          | 0.99   | 0.91          | 1.08            |
| NHS      | 14   | 0.382 0.370 | 429 553 160 475 492 178       | 1142 1145  | 6.86     | 0.0324497     | 2  | 0.80   | 0.67          | 0.96          | 1.00   | 0.78          | 1.29            |

|          |    |             |                             |           |       |           |   |      |      |      |      |      |      |
|----------|----|-------------|-----------------------------|-----------|-------|-----------|---|------|------|------|------|------|------|
| STAGE1-2 | 11 | 0.380 0.368 | 2081 2738 750 2321 2552 815 | 5569 5688 | 21.07 | 2.66E-05  | 2 | 0.84 | 0.77 | 0.91 | 0.97 | 0.87 | 1.09 |
| STAGE2   | 13 | 0.380 0.367 | 1652 2185 590 1846 2060 637 | 4427 4543 | 14.74 | 0.000629  | 2 | 0.84 | 0.77 | 0.92 | 0.97 | 0.85 | 1.10 |
| CPSII    | 15 | 0.377 0.374 | 216 242 83 205 260 70       | 541 535   | 2.00  | 0.3671427 | 2 | 1.13 | 0.87 | 1.47 | 0.89 | 0.61 | 1.29 |
| PBCS1    | 14 | 0.375 0.353 | 193 244 67 284 298 87       | 504 669   | 2.17  | 0.3376809 | 2 | 0.83 | 0.65 | 1.06 | 0.88 | 0.61 | 1.27 |
| PLCO     | 12 | 0.371 0.355 | 371 484 120 395 430 121     | 975 946   | 3.51  | 0.1729516 | 2 | 0.83 | 0.69 | 1.01 | 0.95 | 0.71 | 1.27 |
| WHI      | 2  | 0.385 0.374 | 872 1215 320 962 1072 359   | 2407 2393 | 15.56 | 0.0004186 | 2 | 0.80 | 0.71 | 0.90 | 1.02 | 0.85 | 1.21 |
| STAGE3   | 11 | 0.359 0.362 | 2133 2225 705 1628 1817 533 | 5063 3978 | 2.72  | 0.2569843 | 2 | 1.07 | 0.98 | 1.17 | 0.99 | 0.87 | 1.13 |
| NHS2     | 21 | 0.364 0.373 | 470 516 158 227 268 81      | 1144 576  | 0.45  | 0.7974921 | 2 | 1.08 | 0.87 | 1.34 | 1.06 | 0.78 | 1.45 |
| NOR      | 7  | 0.329 0.316 | 225 216 55 233 237 44       | 496 514   | 2.02  | 0.3650726 | 2 | 1.06 | 0.82 | 1.37 | 0.77 | 0.50 | 1.20 |
| PBCS2    | 5  | 0.359 0.375 | 732 784 238 563 671 204     | 1754 1438 | 2.18  | 0.3354851 | 2 | 1.11 | 0.96 | 1.29 | 1.11 | 0.90 | 1.38 |
| USRT     | 18 | 0.371 0.380 | 405 441 148 303 353 118     | 994 774   | 0.46  | 0.7932919 | 2 | 1.07 | 0.87 | 1.31 | 1.07 | 0.80 | 1.42 |
| WHS      | 7  | 0.356 0.340 | 301 268 106 302 288 86      | 675 676   | 2.80  | 0.2461439 | 2 | 1.07 | 0.85 | 1.35 | 0.81 | 0.58 | 1.12 |
| PBCS 1+2 | 23 | 0.362 0.368 | 925 1029 304 846 967 291    | 2258 2104 | 0.30  | 0.8618715 | 2 | 1.03 | 0.90 | 1.17 | 1.05 | 0.87 | 1.26 |

Locus Alleles Chr Location Neighborhood  
rs4666451 G|A 2p24.1 19150424

| SUBSET   | Rank | MAF         | Geno Counts                   | Subjects  | score X2 | score p-value | df | het OR | het OR 95% CI | het OR 95% CI | hom OR | hom OR 95% CI | hom OR 95% CI_u |
|----------|------|-------------|-------------------------------|-----------|----------|---------------|----|--------|---------------|---------------|--------|---------------|-----------------|
| STAGE1-3 | 24   | 0.391 0.382 | 3546 4486 1479 3251 4055 1238 | 9511 8544 | 4.15     | 0.1255299     | 2  | 0.99   | 0.93          | 1.05          | 0.91   | 0.84          | 1.00            |
| STAGE1-2 | 22   | 0.397 0.377 | 1622 2102 710 1747 2172 628   | 4434 4547 | 9.39     | 0.0091433     | 2  | 0.96   | 0.88          | 1.05          | 0.82   | 0.72          | 0.93            |
| STAGE2   | 19   | 0.397 0.377 | 1622 2102 710 1747 2172 628   | 4434 4547 | 9.39     | 0.0091433     | 2  | 0.96   | 0.88          | 1.05          | 0.82   | 0.72          | 0.93            |
| CPSII    | 7    | 0.394 0.400 | 201 256 86 177 288 70         | 543 535   | 4.99     | 0.025751      | 2  | 1.28   | 0.98          | 1.66          | 0.92   | 0.64          | 1.34            |
| PBCS1    | 16   | 0.409 0.380 | 176 246 84 257 316 96         | 506 669   | 2.10     | 0.3499763     | 2  | 0.88   | 0.68          | 1.13          | 0.78   | 0.55          | 1.11            |
| PLCO     | 16   | 0.393 0.373 | 355 474 146 363 462 123       | 975 948   | 1.83     | 0.4003582     | 2  | 0.95   | 0.78          | 1.16          | 0.82   | 0.62          | 1.09            |
| WHI      | 15   | 0.397 0.372 | 890 1126 394 950 1106 339     | 2410 2395 | 6.22     | 0.0446937     | 2  | 0.92   | 0.81          | 1.04          | 0.81   | 0.68          | 0.96            |
| STAGE3   | 23   | 0.386 0.388 | 1926 2385 769 1504 1887 610   | 5080 4001 | 0.10     | 0.9507899     | 2  | 1.01   | 0.93          | 1.11          | 1.02   | 0.90          | 1.15            |
| NHS2     | 23   | 0.384 0.385 | 446 528 178 220 273 87        | 1152 580  | 0.24     | 0.8867278     | 2  | 1.05   | 0.84          | 1.30          | 0.99   | 0.73          | 1.34            |
| NOR      | 22   | 0.363 0.355 | 201 230 65 214 238 64         | 496 516   | 0.16     | 0.924716      | 2  | 0.97   | 0.75          | 1.27          | 0.92   | 0.62          | 1.37            |
| PBCS2    | 7    | 0.399 0.411 | 621 858 268 504 692 247       | 1747 1443 | 1.85     | 0.3968029     | 2  | 0.99   | 0.85          | 1.16          | 1.14   | 0.92          | 1.40            |
| USRT     | 14   | 0.382 0.370 | 389 452 154 309 358 108       | 995 775   | 0.82     | 0.6629537     | 2  | 1.00   | 0.81          | 1.22          | 0.88   | 0.66          | 1.18            |
| WHS      | 21   | 0.380 0.389 | 269 317 104 257 326 104       | 690 687   | 0.39     | 0.8215183     | 2  | 1.08   | 0.85          | 1.36          | 1.05   | 0.76          | 1.44            |
| PBCS 1+2 | 17   | 0.402 0.401 | 795 1103 352 761 1004 343     | 2250 2108 | 0.89     | 0.6423765     | 2  | 0.95   | 0.83          | 1.08          | 1.02   | 0.85          | 1.22            |

**unadj\_trend**

Locus Alleles Chr Location Neighborhood  
rs11249433 T|C 1p11.2 120982136 LOC647121

| SUBSET   | Rank | MAF         | Geno Counts                   | Subjects   | score X2 | score p-value | df | het OR | het OR 95% CI | het OR 95% CI | hom OR | hom OR 95% CI | hom OR 95% CI_u |
|----------|------|-------------|-------------------------------|------------|----------|---------------|----|--------|---------------|---------------|--------|---------------|-----------------|
| STAGE1-3 | 1    | 0.393 0.425 | 3965 4951 1699 3207 4650 1761 | 10615 9618 | 40.89    | 1.61E-10      | 1  | 1.14   | 1.09          | 1.18          | 1.29   | 1.20          | 1.40            |
| NHS      | 1    | 0.388 0.440 | 425 541 170 358 563 220       | 1136 1141  | 12.57    | 0.000392      | 1  | 1.24   | 1.10          | 1.39          | 1.53   | 1.21          | 1.95            |
| STAGE1-2 | 3    | 0.401 0.431 | 2022 2615 919 1821 2814 1036  | 5556 5671  | 20.77    | 5.19E-06      | 1  | 1.13   | 1.07          | 1.19          | 1.28   | 1.15          | 1.42            |
| STAGE2   | 11   | 0.404 0.429 | 1597 2074 749 1463 2251 816   | 4420 4530  | 11.00    | 0.0009106     | 1  | 1.11   | 1.04          | 1.17          | 1.22   | 1.09          | 1.38            |
| CPSII    | 4    | 0.378 0.417 | 220 235 88 178 267 89         | 543 534    | 3.20     | 0.0737385     | 1  | 1.17   | 0.99          | 1.39          | 1.37   | 0.97          | 1.92            |
| PBCS1    | 22   | 0.387 0.393 | 195 230 81 243 326 100        | 506 669    | 0.08     | 0.7770732     | 1  | 1.02   | 0.87          | 1.21          | 1.05   | 0.75          | 1.47            |
| PLCO     | 23   | 0.420 0.421 | 324 476 169 315 465 165       | 969 945    | 0.00     | 0.9691555     | 1  | 1.00   | 0.88          | 1.14          | 1.01   | 0.78          | 1.30            |
| WHI      | 2    | 0.407 0.444 | 858 1133 411 727 1193 462     | 2402 2382  | 13.63    | 2.23E-04      | 1  | 1.16   | 1.07          | 1.26          | 1.36   | 1.15          | 1.60            |
| STAGE3   | 1    | 0.385 0.416 | 1947 2338 780 1386 1836 725   | 5065 3947  | 17.73    | 2.55E-05      | 1  | 1.14   | 1.07          | 1.20          | 1.29   | 1.15          | 1.45            |
| NHS2     | 2    | 0.400 0.442 | 433 545 197 190 259 124       | 1175 573   | 5.54     | 0.0185813     | 1  | 1.18   | 1.03          | 1.36          | 1.40   | 1.06          | 1.85            |
| NOR      | 6    | 0.380 0.408 | 184 242 66 180 244 86         | 492 510    | 1.64     | 0.2000703     | 1  | 1.13   | 0.94          | 1.35          | 1.27   | 0.88          | 1.82            |
| PBCS2    | 1    | 0.362 0.398 | 719 778 240 518 661 231       | 1737 1410  | 8.39     | 0.0037631     | 1  | 1.16   | 1.05          | 1.28          | 1.35   | 1.10          | 1.65            |
| USRT     | 5    | 0.385 0.410 | 387 443 159 271 371 132       | 989 774    | 2.28     | 0.1312902     | 1  | 1.11   | 0.97          | 1.27          | 1.23   | 0.94          | 1.61            |
| WHS      | 3    | 0.421 0.445 | 224 330 118 227 301 152       | 672 680    | 1.48     | 0.2243665     | 1  | 1.10   | 0.95          | 1.27          | 1.20   | 0.89          | 1.62            |
| PBCS 1+2 | 1    | 0.368 0.397 | 910 1006 321 761 987 331      | 2237 2079  | 7.12     | 0.0076165     | 1  | 1.12   | 1.03          | 1.23          | 1.26   | 1.06          | 1.50            |

Locus Alleles Chr Location Neighborhood  
rs999737 C|T 14q24.1 68104435 RAD51L1

| SUBSET   | Rank | MAF         | Geno Counts                 | Subjects   | score X2 | score p-value | df | het OR | het OR 95% CI | het OR 95% CI | hom OR | hom OR 95% CI | hom OR 95% CI_u |
|----------|------|-------------|-----------------------------|------------|----------|---------------|----|--------|---------------|---------------|--------|---------------|-----------------|
| STAGE1-3 | 2    | 0.239 0.218 | 6217 3775 655/5890 3353 435 | 10647 9678 | 24.26    | 8.40E-07      | 1  | 0.89   | 0.85          | 0.93          | 0.79   | 0.72          | 0.87            |
| NHS      | 10   | 0.244 0.213 | 660 406 76/703 394 47       | 1142 1144  | 6.18     | 0.0129001     | 1  | 0.84   | 0.73          | 0.96          | 0.71   | 0.54          | 0.93            |
| STAGE1-2 | 4    | 0.238 0.213 | 3263 1972 341/3506 1947 237 | 5576 5690  | 20.50    | 5.97E-06      | 1  | 0.87   | 0.81          | 0.92          | 0.75   | 0.66          | 0.85            |
| STAGE2   | 4    | 0.236 0.213 | 2603 1566 265/2803 1553 190 | 4434 4546  | 14.53    | 1.38E-04      | 1  | 0.87   | 0.81          | 0.94          | 0.76   | 0.66          | 0.88            |
| CPSII    | 13   | 0.235 0.222 | 319 193 31/325 182 28       | 543 535    | 0.46     | 0.4968311     | 1  | 0.93   | 0.76          | 1.14          | 0.87   | 0.58          | 1.30            |
| PBCS1    | 6    | 0.242 0.213 | 291 185 30/409 234 25       | 506 668    | 2.94     | 0.0863657     | 1  | 0.84   | 0.69          | 1.03          | 0.71   | 0.48          | 1.05            |
| PLCO     | 7    | 0.238 0.215 | 576 334 65/576 336 36       | 975 948    | 2.82     | 0.0929758     | 1  | 0.88   | 0.76          | 1.02          | 0.77   | 0.57          | 1.04            |
| WHI      | 5    | 0.235 0.209 | 1417 854 139/1493 801 101   | 2410 2395  | 8.98     | 0.0027276     | 1  | 0.86   | 0.78          | 0.95          | 0.75   | 0.61          | 0.90            |
| STAGE3   | 4    | 0.240 0.226 | 2955 1806 314/2386 1408 197 | 5075 3991  | 4.87     | 0.0272598     | 1  | 0.93   | 0.86          | 0.99          | 0.86   | 0.75          | 0.98            |
| NHS2     | 17   | 0.232 0.226 | 698 374 81/350 195 33       | 1153 578   | 0.18     | 0.6717096     | 1  | 0.97   | 0.82          | 1.14          | 0.93   | 0.67          | 1.29            |
| NOR      | 3    | 0.257 0.215 | 271 195 30/319 171 25       | 496 515    | 5.10     | 0.023951      | 1  | 0.79   | 0.64          | 0.97          | 0.62   | 0.41          | 0.94            |
| PBCS2    | 8    | 0.236 0.226 | 1016 637 94/850 514 66      | 1747 1430  | 0.94     | 0.3310008     | 1  | 0.94   | 0.84          | 1.06          | 0.89   | 0.70          | 1.13            |
| USRT     | 10   | 0.243 0.232 | 572 357 62/459 275 43       | 991 777    | 0.51     | 0.4752241     | 1  | 0.95   | 0.81          | 1.10          | 0.89   | 0.65          | 1.22            |
| WHS      | 6    | 0.245 0.226 | 398 243 47/408 253 30       | 688 691    | 1.30     | 0.2545903     | 1  | 0.90   | 0.76          | 1.08          | 0.82   | 0.57          | 1.16            |
| PBCS 1+2 | 6    | 0.237 0.222 | 1306 819 124/1257 746 92    | 2249 2095  | 2.90     | 0.0883354     | 1  | 0.92   | 0.83          | 1.01          | 0.84   | 0.69          | 1.03            |

Locus rs7716600 Alleles C|A Chr 5p12 Location Neighborhood 44910762

| SUBSET   | Rank | MAF         | Geno Counts                 | Subjects   | score X2 | score p-value | df | het OR | het OR 95% CI | het OR 95% CI | hom OR | hom OR 95% CI | hom OR 95% CI_u |
|----------|------|-------------|-----------------------------|------------|----------|---------------|----|--------|---------------|---------------|--------|---------------|-----------------|
| STAGE1-3 | 3    | 0.221 0.241 | 6483 3665 524/5603 3498 581 | 10672 9682 | 22.39    | 2.22E-06      | 1  | 1.12   | 1.07          | 1.17          | 1.25   | 1.14          | 1.37            |
| NHS      | 6    | 0.215 0.249 | 693 402 44/652 415 78       | 1139 1145  | 7.53     | 0.0060599     | 1  | 1.21   | 1.06          | 1.39          | 1.47   | 1.12          | 1.94            |
| STAGE1-2 | 1    | 0.216 0.243 | 3402 1924 241/3288 2028 370 | 5567 5686  | 23.51    | 1.24E-06      | 1  | 1.17   | 1.10          | 1.24          | 1.36   | 1.20          | 1.54            |
| STAGE2   | 2    | 0.216 0.242 | 2709 1522 197/2636 1613 292 | 4428 4541  | 16.39    | 5.15E-05      | 1  | 1.15   | 1.08          | 1.24          | 1.33   | 1.16          | 1.53            |
| CPSII    | 16   | 0.225 0.236 | 325 192 26/315 186 33       | 543 534    | 0.38     | 0.5362324     | 1  | 1.07   | 0.87          | 1.30          | 1.13   | 0.76          | 1.69            |
| PBCS1    | 1    | 0.217 0.263 | 308 173 23/362 256 47       | 504 665    | 6.54     | 0.0105694     | 1  | 1.29   | 1.06          | 1.56          | 1.66   | 1.12          | 2.44            |
| PLCO     | 12   | 0.223 0.238 | 577 359 37/546 353 49       | 973 948    | 1.34     | 0.2468369     | 1  | 1.10   | 0.94          | 1.28          | 1.20   | 0.88          | 1.63            |
| WHI      | 4    | 0.212 0.239 | 1499 798 111/1413 818 163   | 2408 2394  | 9.78     | 0.0017672     | 1  | 1.16   | 1.06          | 1.28          | 1.35   | 1.12          | 1.63            |
| STAGE3   | 7    | 0.226 0.237 | 3081 1743 283/2314 1473 210 | 5107 3997  | 2.90     | 0.088613      | 1  | 1.06   | 0.99          | 1.14          | 1.13   | 0.98          | 1.30            |
| NHS2     | 15   | 0.227 0.235 | 712 397 69/338 219 28       | 1178 585   | 0.28     | 0.5989209     | 1  | 1.05   | 0.89          | 1.23          | 1.09   | 0.79          | 1.52            |
| NOR      | 22   | 0.246 0.241 | 284 178 33/293 191 28       | 495 512    | 0.07     | 0.7843353     | 1  | 0.97   | 0.79          | 1.19          | 0.94   | 0.63          | 1.42            |
| PBCS2    | 10   | 0.223 0.231 | 1070 586 98/847 518 74      | 1754 1439  | 0.64     | 0.4232687     | 1  | 1.05   | 0.93          | 1.18          | 1.10   | 0.87          | 1.39            |
| USRT     | 3    | 0.216 0.253 | 604 350 39/430 293 49       | 993 772    | 7.10     | 0.0077164     | 1  | 1.24   | 1.06          | 1.46          | 1.54   | 1.12          | 2.12            |
| WHS      | 23   | 0.233 0.228 | 411 232 44/406 252 31       | 687 689    | 0.10     | 0.7549767     | 1  | 0.97   | 0.81          | 1.16          | 0.95   | 0.66          | 1.35            |
| PBCS 1+2 | 3    | 0.221 0.241 | 1378 757 121/1210 771 122   | 2256 2103  | 4.79     | 0.028553      | 1  | 1.12   | 1.01          | 1.23          | 1.25   | 1.02          | 1.52            |

Locus rs3134615 Alleles G|T Chr 1p34.2 Location Neighborhood 40134653 TRIT1,MYCL1

| SUBSET   | Rank | MAF         | Geno Counts                 | Subjects   | score X2 | score p-value | df | het OR | het OR 95% CI | het OR 95% CI | hom OR | hom OR 95% CI | hom OR 95% CI_u |
|----------|------|-------------|-----------------------------|------------|----------|---------------|----|--------|---------------|---------------|--------|---------------|-----------------|
| STAGE1-3 | 4    | 0.228 0.246 | 6374 3763 552/5488 3630 568 | 10689 9686 | 19.08    | 1.26E-05      | 1  | 1.11   | 1.06          | 1.16          | 1.23   | 1.12          | 1.34            |
| NHS      | 2    | 0.220 0.263 | 690 402 50/617 454 74       | 1142 1145  | 11.86    | 0.0005742     | 1  | 1.27   | 1.11          | 1.46          | 1.62   | 1.23          | 2.14            |
| STAGE1-2 | 7    | 0.227 0.250 | 3315 1996 265/3183 2170 339 | 5576 5692  | 17.70    | 2.59E-05      | 1  | 1.14   | 1.07          | 1.22          | 1.30   | 1.15          | 1.48            |
| STAGE2   | 13   | 0.228 0.247 | 2625 1594 215/2566 1716 265 | 4434 4547  | 8.85     | 0.0029298     | 1  | 1.11   | 1.04          | 1.19          | 1.23   | 1.07          | 1.42            |
| CPSII    | 11   | 0.215 0.236 | 326 200 17/313 192 30       | 543 535    | 1.29     | 0.2553746     | 1  | 1.13   | 0.92          | 1.39          | 1.27   | 0.84          | 1.92            |
| PBCS1    | 16   | 0.226 0.238 | 299 185 22/387 245 37       | 506 669    | 0.49     | 0.485938      | 1  | 1.07   | 0.88          | 1.30          | 1.15   | 0.78          | 1.70            |
| PLCO     | 9    | 0.236 0.258 | 578 334 63/516 375 57       | 975 948    | 2.49     | 0.1148498     | 1  | 1.12   | 0.97          | 1.30          | 1.27   | 0.94          | 1.69            |
| WHI      | 13   | 0.228 0.248 | 1422 875 113/1350 904 141   | 2410 2395  | 4.98     | 0.0257157     | 1  | 1.11   | 1.01          | 1.23          | 1.24   | 1.03          | 1.50            |
| STAGE3   | 6    | 0.229 0.240 | 3059 1767 287/2305 1463 230 | 5113 3998  | 3.31     | 0.0686974     | 1  | 1.07   | 1.00          | 1.14          | 1.14   | 0.99          | 1.30            |
| NHS2     | 11   | 0.225 0.235 | 724 388 73/341 209 32       | 1185 582   | 0.36     | 0.5476046     | 1  | 1.05   | 0.89          | 1.24          | 1.11   | 0.80          | 1.53            |
| NOR      | 10   | 0.232 0.253 | 292 179 26/284 200 30       | 497 514    | 1.18     | 0.2772063     | 1  | 1.12   | 0.91          | 1.38          | 1.26   | 0.83          | 1.90            |
| PBCS2    | 19   | 0.226 0.231 | 1063 591 102/854 504 81     | 1756 1439  | 0.22     | 0.6376044     | 1  | 1.03   | 0.92          | 1.15          | 1.06   | 0.84          | 1.33            |
| USRT     | 17   | 0.240 0.246 | 567 373 51/445 276 52       | 991 773    | 0.18     | 0.6725947     | 1  | 1.03   | 0.89          | 1.21          | 1.07   | 0.78          | 1.46            |
| WHS      | 2    | 0.224 0.249 | 413 236 35/381 274 35       | 684 690    | 2.56     | 0.1094334     | 1  | 1.16   | 0.97          | 1.38          | 1.34   | 0.94          | 1.92            |
| PBCS 1+2 | 16   | 0.226 0.233 | 1362 776 124/1241 746 117   | 2262 2104  | 0.52     | 0.4707927     | 1  | 1.04   | 0.94          | 1.15          | 1.08   | 0.88          | 1.31            |

| Locus     | Alleles | Chr         | Location                      | Neighborhood |          |               |    |        |               |               |        |               |               |                 |
|-----------|---------|-------------|-------------------------------|--------------|----------|---------------|----|--------|---------------|---------------|--------|---------------|---------------|-----------------|
| rs4415084 | C T     | 5p12        |                               | 44698272     |          |               |    |        |               |               |        |               |               |                 |
| SUBSET    | Rank    | MAF         | Geno Counts                   | Subjects     | score X2 | score p-value | df | het OR | het OR 95% CI | het OR 95% CI | hom OR | hom OR 95% CI | hom OR 95% CI | hom OR 95% CI_u |
| STAGE1-3  | 5       | 0.407 0.429 | 3779 5060 1804 3184 4660 1808 | 10643 9652   | 18.96    | 1.34E-05      | 1  | 1.09   | 1.05          | 1.13          | 1.19   | 1.10          | 1.12          | 1.29            |
| NHS       | 5       | 0.392 0.435 | 429 513 186 350 583 203       | 1128 1136    | 8.61     | 0.0033356     | 1  | 1.19   | 1.06          | 1.34          | 1.43   | 1.12          | 1.12          | 1.81            |
| STAGE1-2  | 16      | 0.404 0.426 | 1986 2660 914 1884 2752 1046  | 5560 5682    | 11.79    | 0.0005964     | 1  | 1.10   | 1.04          | 1.16          | 1.20   | 1.08          | 1.08          | 1.34            |
| STAGE2    | 19      | 0.406 0.424 | 1557 2147 728 1534 2169 843   | 4432 4546    | 5.62     | 0.0177722     | 1  | 1.07   | 1.01          | 1.14          | 1.15   | 1.03          | 1.03          | 1.30            |
| CPSII     | 9       | 0.427 0.399 | 178 265 99 193 257 85         | 542 535      | 1.75     | 0.1862187     | 1  | 0.89   | 0.75          | 1.06          | 0.79   | 0.56          | 0.56          | 1.12            |
| PBCS1     | 2       | 0.410 0.460 | 174 249 83 193 337 139        | 506 669      | 5.82     | 0.015809      | 1  | 1.23   | 1.04          | 1.45          | 1.51   | 1.08          | 1.08          | 2.10            |
| PLCO      | 17      | 0.408 0.422 | 339 475 160 321 454 173       | 974 948      | 0.75     | 0.3853254     | 1  | 1.06   | 0.93          | 1.20          | 1.12   | 0.87          | 0.87          | 1.45            |
| WHI       | 16      | 0.400 0.420 | 866 1158 386 827 1121 446     | 2410 2394    | 3.90     | 0.0483363     | 1  | 1.08   | 1.00          | 1.18          | 1.18   | 1.00          | 1.00          | 1.38            |
| STAGE3    | 2       | 0.411 0.433 | 1793 2403 891 1302 1913 765   | 5087 3980    | 8.04     | 0.0045649     | 1  | 1.09   | 1.03          | 1.15          | 1.19   | 1.05          | 1.05          | 1.33            |
| NHS2      | 4       | 0.399 0.434 | 436 540 199 188 281 111       | 1175 580     | 3.69     | 0.0547338     | 1  | 1.15   | 1.00          | 1.32          | 1.32   | 0.99          | 0.99          | 1.74            |
| NOR       | 8       | 0.438 0.413 | 156 242 95 177 248 88         | 493 513      | 1.27     | 0.2600607     | 1  | 0.90   | 0.76          | 1.08          | 0.82   | 0.57          | 0.57          | 1.16            |
| PBCS2     | 9       | 0.424 0.435 | 593 833 328 457 711 271       | 1754 1439    | 0.76     | 0.3837959     | 1  | 1.04   | 0.95          | 1.15          | 1.09   | 0.90          | 0.90          | 1.33            |
| USRT      | 2       | 0.388 0.445 | 374 467 151 252 358 166       | 992 776      | 11.25    | 0.000797      | 1  | 1.25   | 1.10          | 1.43          | 1.57   | 1.21          | 1.21          | 2.05            |
| WHS       | 13      | 0.414 0.426 | 234 321 118 228 315 129       | 673 672      | 0.42     | 0.5167556     | 1  | 1.05   | 0.90          | 1.22          | 1.11   | 0.82          | 0.82          | 1.49            |
| PBCS 1+2  | 4       | 0.421 0.443 | 767 1079 410 648 1043 407     | 2256 2098    | 4.14     | 0.041839      | 1  | 1.09   | 1.00          | 1.19          | 1.19   | 1.01          | 1.01          | 1.41            |

| Locus      | Alleles | Chr         | Location                    | Neighborhood |          |               |    |        |               |               |        |               |               |                 |  |
|------------|---------|-------------|-----------------------------|--------------|----------|---------------|----|--------|---------------|---------------|--------|---------------|---------------|-----------------|--|
| rs17570439 | T C     | 1p34.2      |                             | 40096797     | TRIT1    |               |    |        |               |               |        |               |               |                 |  |
| SUBSET     | Rank    | MAF         | Geno Counts                 | Subjects     | score X2 | score p-value | df | het OR | het OR 95% CI | het OR 95% CI | hom OR | hom OR 95% CI | hom OR 95% CI | hom OR 95% CI_u |  |
| STAGE1-3   | 6       | 0.209 0.226 | 6650 3528 455 5797 3380 500 | 10633 9677   | 18.52    | 1.68E-05      | 1  | 1.11   | 1.06          | 1.16          | 1.23   | 1.12          | 1.12          | 1.35            |  |
| NHS        | 3       | 0.204 0.244 | 719 381 42 654 424 67       | 1142 1145    | 10.72    | 0.0010575     | 1  | 1.27   | 1.10          | 1.46          | 1.60   | 1.21          | 1.21          | 2.12            |  |
| STAGE1-2   | 10      | 0.207 0.230 | 3473 1895 208 3380 2006 303 | 5576 5689    | 16.69    | 4.40E-05      | 1  | 1.14   | 1.07          | 1.22          | 1.30   | 1.15          | 1.15          | 1.48            |  |
| STAGE2     | 14      | 0.208 0.226 | 2754 1514 166 2726 1582 236 | 4434 4544    | 8.53     | 0.003494      | 1  | 1.11   | 1.04          | 1.20          | 1.24   | 1.07          | 1.07          | 1.43            |  |
| CPSII      | 10      | 0.196 0.218 | 343 187 13 329 179 27       | 543 535      | 1.59     | 0.2071463     | 1  | 1.15   | 0.93          | 1.42          | 1.31   | 0.86          | 0.86          | 2.01            |  |
| PBCS1      | 18      | 0.210 0.222 | 310 179 17 406 228 34       | 506 668      | 0.43     | 0.5142292     | 1  | 1.07   | 0.87          | 1.31          | 1.14   | 0.76          | 0.76          | 1.71            |  |
| PLCO       | 13      | 0.220 0.235 | 599 323 53 552 346 50       | 975 948      | 1.26     | 0.2623712     | 1  | 1.09   | 0.94          | 1.27          | 1.19   | 0.88          | 0.88          | 1.60            |  |
| WHI        | 10      | 0.206 0.225 | 1502 825 83 1439 829 125    | 2410 2393    | 5.70     | 0.0169514     | 1  | 1.13   | 1.02          | 1.24          | 1.27   | 1.04          | 1.04          | 1.55            |  |
| STAGE3     | 5       | 0.210 0.222 | 3177 1634 247 2416 1374 197 | 5058 3987    | 3.35     | 0.0671187     | 1  | 1.07   | 1.00          | 1.15          | 1.14   | 0.99          | 0.99          | 1.31            |  |
| NHS2       | 8       | 0.206 0.227 | 730 346 61 342 202 29       | 1137 573     | 1.93     | 0.1642474     | 1  | 1.13   | 0.95          | 1.33          | 1.27   | 0.91          | 0.91          | 1.78            |  |
| NOR        | 7       | 0.210 0.233 | 310 164 22 301 185 27       | 496 513      | 1.59     | 0.2076341     | 1  | 1.15   | 0.93          | 1.41          | 1.31   | 0.86          | 0.86          | 2.00            |  |
| PBCS2      | 12      | 0.208 0.216 | 1111 557 86 891 478 72      | 1754 1441    | 0.59     | 0.441558      | 1  | 1.05   | 0.93          | 1.18          | 1.10   | 0.87          | 0.87          | 1.39            |  |
| USRT       | 22      | 0.218 0.221 | 607 344 45 476 258 43       | 996 777      | 0.06     | 0.8039169     | 1  | 1.02   | 0.87          | 1.20          | 1.04   | 0.76          | 0.76          | 1.43            |  |
| WHS        | 14      | 0.214 0.222 | 419 223 33 406 251 26       | 675 683      | 0.24     | 0.6209417     | 1  | 1.05   | 0.87          | 1.26          | 1.10   | 0.76          | 0.76          | 1.59            |  |
| PBCS 1+2   | 12      | 0.208 0.218 | 1421 735 103 1298 706 106   | 2259 2110    | 1.10     | 0.2943556     | 1  | 1.06   | 0.95          | 1.17          | 1.12   | 0.91          | 0.91          | 1.37            |  |

| Locus     | Alleles | Chr         | Location                | Neighborhood |          |               |    |        |               |               |        |               |               |                 |  |
|-----------|---------|-------------|-------------------------|--------------|----------|---------------|----|--------|---------------|---------------|--------|---------------|---------------|-----------------|--|
| rs2303659 | G A     | 11q24.3     |                         | 129326474    | PRDM10   |               |    |        |               |               |        |               |               |                 |  |
| SUBSET    | Rank    | MAF         | Geno Counts             | Subjects     | score X2 | score p-value | df | het OR | het OR 95% CI | het OR 95% CI | hom OR | hom OR 95% CI | hom OR 95% CI | hom OR 95% CI_u |  |
| STAGE1-3  | 7       | 0.035 0.028 | 9926 718 10 9156 508 14 | 10654 9678   | 16.01    | 6.31E-05      | 1  | 0.79   | 0.71          | 0.89          | 0.63   | 0.50          | 0.50          | 0.79            |  |
| NHS       | 13      | 0.034 0.024 | 1064 78 0 1089 56 0     | 1142 1145    | 3.90     | 0.0483349     | 1  | 0.70   | 0.49          | 1.00          | 0.49   | 0.24          | 0.24          | 1.00            |  |
| STAGE1-2  | 9       | 0.034 0.025 | 5198 376 2 5412 277 3   | 5576 5692    | 17.00    | 3.73E-05      | 1  | 0.72   | 0.61          | 0.84          | 0.52   | 0.38          | 0.38          | 0.71            |  |
| STAGE2    | 6       | 0.034 0.025 | 4134 298 2 4323 221 3   | 4434 4547    | 13.13    | 2.90E-04      | 1  | 0.72   | 0.61          | 0.86          | 0.52   | 0.37          | 0.37          | 0.74            |  |
| CPSII     | 2       | 0.030 0.017 | 510 33 0 518 16 1       | 543 535      | 4.23     | 0.0398003     | 1  | 0.55   | 0.31          | 0.98          | 0.30   | 0.10          | 0.10          | 0.96            |  |
| PBCS1     | 8       | 0.033 0.022 | 473 33 0 640 29 0       | 506 669      | 2.76     | 0.0968477     | 1  | 0.65   | 0.39          | 1.08          | 0.42   | 0.15          | 0.15          | 1.18            |  |
| PLCO      | 10      | 0.036 0.028 | 906 68 1 895 52 1       | 975 948      | 1.69     | 0.1929965     | 1  | 0.79   | 0.55          | 1.13          | 0.62   | 0.30          | 0.30          | 1.28            |  |
| WHI       | 11      | 0.034 0.026 | 2245 164 1 2270 124 1   | 2410 2395    | 5.49     | 0.0191137     | 1  | 0.75   | 0.59          | 0.96          | 0.57   | 0.35          | 0.35          | 0.91            |  |
| STAGE3    | 8       | 0.035 0.032 | 4728 342 8 3745 231 11  | 5078 3987    | 1.65     | 0.1985887     | 1  | 0.90   | 0.77          | 1.06          | 0.81   | 0.59          | 0.59          | 1.12            |  |
| NHS2      | 3       | 0.040 0.025 | 1074 82 5 558 21 4      | 1161 583     | 4.51     | 0.0336995     | 1  | 0.65   | 0.43          | 0.97          | 0.42   | 0.19          | 0.19          | 0.94            |  |
| NOR       | 13      | 0.036 0.043 | 460 36 0 472 44 0       | 496 516      | 0.56     | 0.4544747     | 1  | 1.19   | 0.75          | 1.88          | 1.42   | 0.57          | 0.57          | 3.55            |  |
| PBCS2     | 16      | 0.032 0.030 | 1648 112 1 1358 83 2    | 1761 1443    | 0.26     | 0.611312      | 1  | 0.93   | 0.70          | 1.23          | 0.86   | 0.49          | 0.49          | 1.52            |  |
| USRT      | 18      | 0.037 0.035 | 920 74 0 723 54 0       | 994 777      | 0.16     | 0.6898258     | 1  | 0.93   | 0.65          | 1.34          | 0.86   | 0.42          | 0.42          | 1.79            |  |

|          |    |             |                       |           |      |           |   |      |      |      |      |      |      |
|----------|----|-------------|-----------------------|-----------|------|-----------|---|------|------|------|------|------|------|
| WHS      | 21 | 0.032 0.029 | 626 38 2 634 29 5     | 666 668   | 0.11 | 0.7422466 | 1 | 0.93 | 0.62 | 1.41 | 0.87 | 0.38 | 1.99 |
| PBCS 1+2 | 10 | 0.032 0.027 | 2121 145 1 1997 112 2 | 2267 2111 | 1.85 | 0.1737974 | 1 | 0.84 | 0.66 | 1.08 | 0.71 | 0.43 | 1.16 |

| Locus      | Alleles | Chr         | Location                   | Neighborhood |          |               |    |        |               |               |        |               |                 |
|------------|---------|-------------|----------------------------|--------------|----------|---------------|----|--------|---------------|---------------|--------|---------------|-----------------|
| rs10850145 | C T     | 12q24.13    |                            | 112428512    |          |               |    |        |               |               |        |               |                 |
| SUBSET     | Rank    | MAF         | Geno Counts                | Subjects     | score X2 | score p-value | df | het OR | het OR 95% CI | het OR 95% CI | hom OR | hom OR 95% CI | hom OR 95% CI_u |
| STAGE1-3   | 8       | 0.095 0.106 | 8763 1844 91 7754 1837 115 | 10698 9706   | 15.67    | 7.54E-05      | 1  | 1.14   | 1.07          | 1.22          | 1.30   | 1.14          | 1.48            |
| NHS        | 7       | 0.086 0.110 | 951 186 5 912 215 18       | 1142 1145    | 7.30     | 0.006898      | 1  | 1.31   | 1.08          | 1.59          | 1.72   | 1.16          | 2.54            |
| STAGE1-2   | 5       | 0.090 0.108 | 4627 897 52 4535 1085 70   | 5576 5690    | 20.00    | 7.76E-06      | 1  | 1.22   | 1.12          | 1.33          | 1.49   | 1.25          | 1.77            |
| STAGE2     | 5       | 0.091 0.107 | 3676 711 47 3623 870 52    | 4434 4545    | 13.31    | 2.65E-04      | 1  | 1.20   | 1.09          | 1.32          | 1.44   | 1.18          | 1.75            |
| CPSII      | 17      | 0.099 0.107 | 444 90 9 426 103 6         | 543 535      | 0.36     | 0.5473306     | 1  | 1.09   | 0.83          | 1.43          | 1.18   | 0.69          | 2.04            |
| PBCS1      | 9       | 0.094 0.113 | 417 83 6 523 141 5         | 506 669      | 2.25     | 0.1333181     | 1  | 1.23   | 0.94          | 1.62          | 1.52   | 0.88          | 2.62            |
| PLCO       | 6       | 0.077 0.094 | 832 135 8 775 167 6        | 975 948      | 3.53     | 0.0601097     | 1  | 1.24   | 0.99          | 1.56          | 1.54   | 0.98          | 2.43            |
| WHI        | 6       | 0.094 0.111 | 1983 403 24 1899 459 35    | 2410 2393    | 7.39     | 0.0065559     | 1  | 1.20   | 1.05          | 1.37          | 1.44   | 1.11          | 1.87            |
| STAGE3     | 10      | 0.100 0.105 | 4136 948 39 3221 752 45    | 5123 4018    | 1.07     | 0.3003953     | 1  | 1.05   | 0.96          | 1.16          | 1.11   | 0.91          | 1.34            |
| NHS2       | 16      | 0.103 0.108 | 947 218 12 474 96 15       | 1177 585     | 0.19     | 0.6623319     | 1  | 1.05   | 0.84          | 1.31          | 1.10   | 0.71          | 1.72            |
| NOR        | 14      | 0.081 0.090 | 414 80 0 426 82 5          | 494 513      | 0.50     | 0.4784611     | 1  | 1.12   | 0.82          | 1.54          | 1.26   | 0.67          | 2.38            |
| PBCS2      | 15      | 0.104 0.108 | 1412 338 15 1152 282 16    | 1765 1450    | 0.28     | 0.5987165     | 1  | 1.04   | 0.89          | 1.23          | 1.09   | 0.79          | 1.50            |
| USRT       | 23      | 0.105 0.106 | 799 184 12 622 146 9       | 995 777      | 0.01     | 0.9226848     | 1  | 1.01   | 0.81          | 1.25          | 1.02   | 0.66          | 1.57            |
| WHS        | 5       | 0.092 0.105 | 564 128 0 547 146 0        | 692 693      | 1.44     | 0.2298343     | 1  | 1.18   | 0.90          | 1.53          | 1.38   | 0.81          | 2.35            |
| PBCS 1+2   | 11      | 0.102 0.110 | 1829 420 21 1673 423 21    | 2270 2117    | 1.53     | 0.2156371     | 1  | 1.09   | 0.95          | 1.25          | 1.19   | 0.90          | 1.57            |

| Locus     | Alleles | Chr         | Location                    | Neighborhood |          |               |    |        |               |               |        |               |                 |
|-----------|---------|-------------|-----------------------------|--------------|----------|---------------|----|--------|---------------|---------------|--------|---------------|-----------------|
| rs2067980 | A G     | 5p12        |                             | 45018074     |          |               |    |        |               |               |        |               |                 |
| SUBSET    | Rank    | MAF         | Geno Counts                 | Subjects     | score X2 | score p-value | df | het OR | het OR 95% CI | het OR 95% CI | hom OR | hom OR 95% CI | hom OR 95% CI_u |
| STAGE1-3  | 9       | 0.159 0.173 | 7544 2828 285 6652 2704 318 | 10657 9674   | 12.59    | 0.0003888     | 1  | 1.10   | 1.04          | 1.16          | 1.21   | 1.09          | 1.34            |
| NHS       | 9       | 0.151 0.178 | 814 311 17 769 342 33       | 1142 1144    | 6.42     | 0.0112574     | 1  | 1.23   | 1.05          | 1.44          | 1.51   | 1.10          | 2.08            |
| STAGE1-2  | 2       | 0.151 0.174 | 4007 1455 114 3905 1597 189 | 5576 5691    | 21.08    | 4.40E-06      | 1  | 1.18   | 1.10          | 1.27          | 1.39   | 1.21          | 1.61            |
| STAGE2    | 3       | 0.151 0.172 | 3193 1144 97 3136 1255 156  | 4434 4547    | 14.99    | 1.08E-04      | 1  | 1.17   | 1.08          | 1.27          | 1.37   | 1.17          | 1.60            |
| CPSII     | 20      | 0.159 0.164 | 383 147 13 377 140 18       | 543 535      | 0.10     | 0.7460733     | 1  | 1.04   | 0.83          | 1.30          | 1.08   | 0.68          | 1.70            |
| PBCS1     | 4       | 0.191 0.227 | 335 149 22 400 234 35       | 506 669      | 4.50     | 0.0339061     | 1  | 1.24   | 1.02          | 1.52          | 1.54   | 1.03          | 2.30            |
| PLCO      | 5       | 0.144 0.166 | 714 241 20 658 265 25       | 975 948      | 3.58     | 0.0584207     | 1  | 1.18   | 0.99          | 1.41          | 1.40   | 0.99          | 1.99            |
| WHI       | 9       | 0.143 0.161 | 1761 607 42 1701 616 78     | 2410 2395    | 5.82     | 0.0158246     | 1  | 1.15   | 1.03          | 1.28          | 1.31   | 1.05          | 1.64            |
| STAGE3    | 16      | 0.169 0.172 | 3537 1374 171 2747 1110 129 | 5082 3986    | 0.24     | 0.6272299     | 1  | 1.02   | 0.94          | 1.10          | 1.04   | 0.89          | 1.21            |
| NHS2      | 9       | 0.170 0.156 | 810 306 44 411 145 17       | 1160 573     | 0.98     | 0.3228587     | 1  | 0.91   | 0.75          | 1.10          | 0.83   | 0.57          | 1.20            |
| NOR       | 17      | 0.142 0.135 | 364 125 8 382 127 6         | 497 515      | 0.21     | 0.6456548     | 1  | 0.94   | 0.73          | 1.22          | 0.89   | 0.53          | 1.48            |
| PBCS2     | 22      | 0.190 0.192 | 1158 519 73 941 441 55      | 1750 1437    | 0.03     | 0.8636704     | 1  | 1.01   | 0.89          | 1.14          | 1.02   | 0.80          | 1.31            |
| USRT      | 4       | 0.155 0.177 | 713 256 26 530 216 29       | 995 775      | 2.98     | 0.0841888     | 1  | 1.17   | 0.98          | 1.39          | 1.36   | 0.96          | 1.94            |
| WHS       | 11      | 0.153 0.164 | 492 168 20 483 181 22       | 680 686      | 0.60     | 0.4384682     | 1  | 1.08   | 0.89          | 1.32          | 1.17   | 0.78          | 1.75            |
| PBCS 1+2  | 8       | 0.190 0.203 | 1493 667 95 1341 672 90     | 2255 2103    | 2.12     | 0.1454611     | 1  | 1.08   | 0.97          | 1.20          | 1.17   | 0.95          | 1.44            |

| Locus     | Alleles | Chr         | Location                      | Neighborhood |          |               |    |        |               |               |        |               |                 |  |
|-----------|---------|-------------|-------------------------------|--------------|----------|---------------|----|--------|---------------|---------------|--------|---------------|-----------------|--|
| rs1274466 | T C     | 10p11.21    |                               | 34510210     | PARD3    |               |    |        |               |               |        |               |                 |  |
| SUBSET    | Rank    | MAF         | Geno Counts                   | Subjects     | score X2 | score p-value | df | het OR | het OR 95% CI | het OR 95% CI | hom OR | hom OR 95% CI | hom OR 95% CI_u |  |
| STAGE1-3  | 10      | 0.449 0.432 | 3262 5237 2175 3133 4725 1825 | 10674 9683   | 11.30    | 0.0007768     | 1  | 0.94   | 0.90          | 0.97          | 0.87   | 0.81          | 0.95            |  |
| NHS       | 12      | 0.470 0.439 | 312 586 244 357 569 218       | 1142 1144    | 4.51     | 0.0337141     | 1  | 0.88   | 0.78          | 0.99          | 0.77   | 0.61          | 0.98            |  |
| STAGE1-2  | 12      | 0.456 0.430 | 1656 2757 1163 1852 2785 1053 | 5576 5690    | 15.39    | 8.74E-05      | 1  | 0.90   | 0.85          | 0.95          | 0.81   | 0.73          | 0.90            |  |
| STAGE2    | 12      | 0.452 0.427 | 1344 2171 919 1495 2216 835   | 4434 4546    | 10.99    | 0.0009139     | 1  | 0.91   | 0.85          | 0.96          | 0.82   | 0.73          | 0.92            |  |
| CPSII     | 6       | 0.471 0.436 | 152 271 120 172 259 104       | 543 535      | 2.51     | 0.1134113     | 1  | 0.87   | 0.74          | 1.03          | 0.76   | 0.54          | 1.07            |  |
| PBCS1     | 5       | 0.483 0.446 | 138 247 121 200 340 128       | 506 668      | 3.21     | 0.0733658     | 1  | 0.86   | 0.73          | 1.01          | 0.74   | 0.53          | 1.03            |  |
| PLCO      | 4       | 0.449 0.419 | 298 478 199 319 464 165       | 975 948      | 3.62     | 0.0571498     | 1  | 0.88   | 0.78          | 1.00          | 0.78   | 0.60          | 1.01            |  |
| WHI       | 18      | 0.443 0.424 | 756 1175 479 804 1153 438     | 2410 2395    | 3.46     | 0.0627162     | 1  | 0.93   | 0.86          | 1.00          | 0.86   | 0.73          | 1.01            |  |
| STAGE3    | 12      | 0.442 0.436 | 1606 2484 1013 1282 1942 774  | 5103 3998    | 0.53     | 0.4668049     | 1  | 0.98   | 0.92          | 1.04          | 0.96   | 0.85          | 1.08            |  |
| NHS2      | 20      | 0.441 0.435 | 379 559 240 186 286 110       | 1178 582     | 0.12     | 0.7266275     | 1  | 0.98   | 0.85          | 1.12          | 0.95   | 0.72          | 1.26            |  |

|          |    |             |                           |           |      |           |   |      |      |      |      |      |      |
|----------|----|-------------|---------------------------|-----------|------|-----------|---|------|------|------|------|------|------|
| NOR      | 18 | 0.391 0.401 | 184 235 76 188 240 86     | 495 514   | 0.20 | 0.6529703 | 1 | 1.04 | 0.87 | 1.24 | 1.08 | 0.76 | 1.55 |
| PBCS2    | 5  | 0.457 0.441 | 518 863 368 456 695 287   | 1749 1438 | 1.59 | 0.2075264 | 1 | 0.94 | 0.85 | 1.04 | 0.88 | 0.72 | 1.07 |
| USRT     | 12 | 0.454 0.444 | 295 489 205 243 378 156   | 989 777   | 0.38 | 0.5357989 | 1 | 0.96 | 0.84 | 1.10 | 0.92 | 0.70 | 1.20 |
| WHS      | 4  | 0.423 0.446 | 230 338 124 209 343 135   | 692 687   | 1.46 | 0.2274279 | 1 | 1.10 | 0.94 | 1.28 | 1.20 | 0.89 | 1.63 |
| PBCS 1+2 | 5  | 0.463 0.442 | 656 1106 488 655 1033 413 | 2250 2101 | 3.57 | 0.058811  | 1 | 0.92 | 0.85 | 1.00 | 0.85 | 0.72 | 1.01 |

Locus rs10941679 Alleles A|G Chr 5p12 Location Neighborhood 44742255

| SUBSET   | Rank | MAF         | Geno Counts                 | Subjects  | score X2 | score p-value | df | het OR | het OR 95% CI | het OR 95% CI | hom OR | hom OR 95% CI | hom OR 95% CI_u |
|----------|------|-------------|-----------------------------|-----------|----------|---------------|----|--------|---------------|---------------|--------|---------------|-----------------|
| STAGE1-3 | 11   | 0.259 0.279 | 3047 2125 374 2387 1867 353 | 5546 4607 | 10.52    | 0.0011835     | 1  | 1.11   | 1.04          | 1.18          | 1.23   | 1.09          | 1.39            |
| STAGE3   | 3    | 0.259 0.277 | 2791 1931 347 2070 1609 297 | 5069 3976 | 7.47     | 0.006268      | 1  | 1.10   | 1.03          | 1.17          | 1.20   | 1.05          | 1.37            |
| NHS2     | 7    | 0.255 0.277 | 637 430 76 301 228 45       | 1143 574  | 1.97     | 0.1608271     | 1  | 1.12   | 0.96          | 1.31          | 1.26   | 0.91          | 1.73            |
| NOR      | 9    | 0.303 0.282 | 239 213 44 265 210 40       | 496 515   | 1.18     | 0.2768978     | 1  | 0.90   | 0.74          | 1.09          | 0.81   | 0.55          | 1.19            |
| PBCS2    | 3    | 0.259 0.276 | 969 667 121 737 605 94      | 1757 1436 | 2.50     | 0.1135055     | 1  | 1.10   | 0.98          | 1.23          | 1.20   | 0.96          | 1.50            |
| USRT     | 1    | 0.236 0.290 | 575 373 49 395 307 71       | 997 773   | 13.29    | 2.67E-04      | 1  | 1.32   | 1.14          | 1.54          | 1.75   | 1.30          | 2.38            |
| WHS      | 19   | 0.268 0.260 | 371 248 57 372 259 47       | 676 678   | 0.19     | 0.666769      | 1  | 0.96   | 0.81          | 1.14          | 0.93   | 0.66          | 1.30            |
| PBCS 1+2 | 2    | 0.259 0.281 | 1225 861 148 1054 863 150   | 2234 2067 | 5.55     | 0.018435      | 1  | 1.12   | 1.02          | 1.24          | 1.26   | 1.04          | 1.53            |

Locus rs9491859 Alleles C|A Chr 6q22.33 Location Neighborhood 128106056 C6orf190

| SUBSET   | Rank | MAF         | Geno Counts                   | Subjects   | score X2 | score p-value | df | het OR | het OR 95% CI | het OR 95% CI | hom OR | hom OR 95% CI | hom OR 95% CI_u |
|----------|------|-------------|-------------------------------|------------|----------|---------------|----|--------|---------------|---------------|--------|---------------|-----------------|
| STAGE1-3 | 12   | 0.355 0.369 | 4448 4846 1351 3883 4411 1360 | 10645 9654 | 9.49     | 0.0020694     | 1  | 1.07   | 1.02          | 1.11          | 1.14   | 1.05          | 1.23            |
| NHS      | 14   | 0.356 0.381 | 459 552 130 447 523 175       | 1141 1145  | 3.20     | 0.0736204     | 1  | 1.12   | 0.99          | 1.26          | 1.25   | 0.98          | 1.59            |
| STAGE1-2 | 11   | 0.348 0.374 | 2351 2569 655 2284 2560 846   | 5575 5690  | 15.98    | 6.41E-05      | 1  | 1.12   | 1.06          | 1.18          | 1.25   | 1.12          | 1.39            |
| STAGE2   | 7    | 0.346 0.372 | 1892 2017 525 1837 2037 671   | 4434 4545  | 12.82    | 0.0003429     | 1  | 1.12   | 1.05          | 1.19          | 1.25   | 1.11          | 1.41            |
| CPSII    | 19   | 0.350 0.339 | 220 266 57 238 231 66         | 543 535    | 0.28     | 0.5988993     | 1  | 0.95   | 0.80          | 1.14          | 0.91   | 0.63          | 1.30            |
| PBCS1    | 19   | 0.345 0.356 | 216 231 59 287 287 94         | 506 668    | 0.28     | 0.5970896     | 1  | 1.05   | 0.88          | 1.24          | 1.10   | 0.78          | 1.53            |
| PLCO     | 2    | 0.333 0.374 | 437 427 111 378 430 140       | 975 948    | 7.12     | 0.007613      | 1  | 1.20   | 1.05          | 1.36          | 1.43   | 1.10          | 1.86            |
| WHI      | 3    | 0.350 0.382 | 1019 1093 298 934 1089 371    | 2410 2394  | 10.37    | 0.0012808     | 1  | 1.14   | 1.05          | 1.24          | 1.31   | 1.11          | 1.54            |
| STAGE3   | 22   | 0.362 0.363 | 2098 2281 696 1600 1852 514   | 5075 3966  | 0.03     | 0.8668514     | 1  | 1.01   | 0.95          | 1.07          | 1.01   | 0.89          | 1.14            |
| NHS2     | 23   | 0.367 0.365 | 482 523 170 238 257 82        | 1175 577   | 0.02     | 0.8912604     | 1  | 0.99   | 0.86          | 1.14          | 0.98   | 0.74          | 1.31            |
| NOR      | 24   | 0.372 0.371 | 200 212 75 200 232 70         | 487 502    | 0.00     | 0.9587393     | 1  | 1.00   | 0.83          | 1.19          | 0.99   | 0.69          | 1.42            |
| PBCS2    | 24   | 0.349 0.349 | 744 779 218 599 660 169       | 1741 1428  | 0.00     | 0.9667172     | 1  | 1.00   | 0.90          | 1.11          | 1.00   | 0.82          | 1.24            |
| USRT     | 15   | 0.374 0.366 | 391 459 141 311 366 102       | 991 779    | 0.24     | 0.6242532     | 1  | 0.97   | 0.84          | 1.11          | 0.93   | 0.71          | 1.23            |
| WHS      | 7    | 0.361 0.382 | 281 308 92 252 337 91         | 681 680    | 1.23     | 0.267502      | 1  | 1.09   | 0.93          | 1.28          | 1.19   | 0.87          | 1.63            |
| PBCS 1+2 | 20   | 0.348 0.351 | 959 1006 277 885 946 263      | 2242 2094  | 0.12     | 0.7283692     | 1  | 1.02   | 0.93          | 1.11          | 1.03   | 0.87          | 1.23            |

Locus rs724244 Alleles C|T Chr 3p24.1 Location Neighborhood 27217157 NEK10

| SUBSET   | Rank | MAF         | Geno Counts                 | Subjects  | score X2 | score p-value | df | het OR | het OR 95% CI | het OR 95% CI | hom OR | hom OR 95% CI | hom OR 95% CI_u |
|----------|------|-------------|-----------------------------|-----------|----------|---------------|----|--------|---------------|---------------|--------|---------------|-----------------|
| STAGE1-3 | 13   | 0.261 0.275 | 5213 3644 662 4497 3397 649 | 9519 8543 | 8.75     | 0.0030964     | 1  | 1.07   | 1.02          | 1.12          | 1.15   | 1.05          | 1.26            |
| STAGE1-2 | 6    | 0.252 0.281 | 2473 1688 272 2354 1826 363 | 4433 4543 | 19.50    | 1.01E-05      | 1  | 1.16   | 1.09          | 1.24          | 1.35   | 1.18          | 1.54            |
| STAGE2   | 1    | 0.252 0.281 | 2473 1688 272 2354 1826 363 | 4433 4543 | 19.50    | 1.01E-05      | 1  | 1.16   | 1.09          | 1.24          | 1.35   | 1.18          | 1.54            |
| CPSII    | 8    | 0.247 0.273 | 309 198 35 287 202 45       | 542 534   | 1.85     | 0.1736715     | 1  | 1.14   | 0.94          | 1.38          | 1.30   | 0.89          | 1.90            |
| PBCS1    | 14   | 0.246 0.265 | 293 177 36 368 245 54       | 506 667   | 0.98     | 0.3211717     | 1  | 1.10   | 0.91          | 1.32          | 1.20   | 0.83          | 1.73            |
| PLCO     | 1    | 0.230 0.291 | 569 364 42 481 381 85       | 975 947   | 18.84    | 1.42E-05      | 1  | 1.38   | 1.19          | 1.60          | 1.91   | 1.42          | 2.56            |
| WHI      | 12   | 0.263 0.283 | 1302 949 159 1218 998 179   | 2410 2395 | 5.06     | 0.0244995     | 1  | 1.11   | 1.01          | 1.22          | 1.23   | 1.03          | 1.48            |
| STAGE3   | 20   | 0.269 0.268 | 2740 1960 390 2144 1572 286 | 5090 4002 | 0.04     | 0.8464814     | 1  | 0.99   | 0.93          | 1.06          | 0.99   | 0.87          | 1.13            |
| NHS2     | 10   | 0.270 0.283 | 638 417 105 302 231 49      | 1160 582  | 0.56     | 0.4540713     | 1  | 1.06   | 0.91          | 1.23          | 1.12   | 0.83          | 1.52            |
| NOR      | 12   | 0.248 0.264 | 276 192 27 278 204 34       | 495 516   | 0.62     | 0.4309287     | 1  | 1.08   | 0.89          | 1.33          | 1.18   | 0.78          | 1.77            |
| PBCS2    | 6    | 0.273 0.261 | 926 696 131 778 567 92      | 1753 1437 | 1.16     | 0.2817686     | 1  | 0.94   | 0.84          | 1.05          | 0.88   | 0.71          | 1.11            |
| USRT     | 16   | 0.273 0.267 | 524 397 73 418 302 56       | 994 776   | 0.18     | 0.6710384     | 1  | 0.97   | 0.83          | 1.12          | 0.94   | 0.69          | 1.26            |
| WHS      | 18   | 0.266 0.274 | 376 258 54 368 268 55       | 688 691   | 0.19     | 0.6610503     | 1  | 1.04   | 0.88          | 1.22          | 1.08   | 0.77          | 1.50            |
| PBCS 1+2 | 19   | 0.267 0.262 | 1219 869 167 1145 811 146   | 2255 2102 | 0.21     | 0.6454463     | 1  | 0.98   | 0.89          | 1.08          | 0.96   | 0.79          | 1.16            |

| Locus      | Alleles | Chr         | Location                      | Neighborhood    |          |               |    |        |               |               |        |               |                 |  |
|------------|---------|-------------|-------------------------------|-----------------|----------|---------------|----|--------|---------------|---------------|--------|---------------|-----------------|--|
| rs12622050 | G A     | 2q11.2      |                               | 100945886 NPAS2 |          |               |    |        |               |               |        |               |                 |  |
| SUBSET     | Rank    | MAF         | Geno Counts                   | Subjects        | score X2 | score p-value | df | het OR | het OR 95% CI | het OR 95% CI | hom OR | hom OR 95% CI | hom OR 95% CI_u |  |
| STAGE1-3   | 14      | 0.223 0.212 | 6394 3731 508/6029 3163 462   | 10633 9654      | 7.90     | 0.0049376     | 1  | 0.93   | 0.89          | 0.98          | 0.87   | 0.79          | 0.96            |  |
| NHS        | 8       | 0.220 0.189 | 695 392 55/754 349 42         | 1142 1145       | 6.60     | 0.0101728     | 1  | 0.83   | 0.72          | 0.96          | 0.69   | 0.51          | 0.91            |  |
| STAGE1-2   | 15      | 0.220 0.201 | 3356 1980 239/3650 1790 248   | 5575 5688       | 12.96    | 0.0003174     | 1  | 0.89   | 0.83          | 0.95          | 0.79   | 0.69          | 0.90            |  |
| STAGE2     | 17      | 0.221 0.204 | 2661 1588 184/2896 1441 206   | 4433 4543       | 7.54     | 0.0060418     | 1  | 0.90   | 0.84          | 0.97          | 0.82   | 0.71          | 0.94            |  |
| CPSII      | 14      | 0.217 0.205 | 323 203 16/341 165 27         | 542 533         | 0.43     | 0.5132963     | 1  | 0.93   | 0.76          | 1.15          | 0.87   | 0.57          | 1.32            |  |
| PBCS1      | 21      | 0.244 0.239 | 284 197 25/391 235 42         | 506 668         | 0.09     | 0.7656148     | 1  | 0.97   | 0.80          | 1.18          | 0.94   | 0.64          | 1.38            |  |
| PLCO       | 3       | 0.229 0.199 | 577 350 48/606 307 35         | 975 948         | 5.18     | 0.0228062     | 1  | 0.83   | 0.71          | 0.98          | 0.70   | 0.51          | 0.95            |  |
| WHI        | 14      | 0.213 0.196 | 1477 838 95/1558 734 102      | 2410 2394       | 4.48     | 0.0343452     | 1  | 0.90   | 0.81          | 0.99          | 0.81   | 0.66          | 0.98            |  |
| STAGE3     | 24      | 0.226 0.227 | 3039 1753 269/2380 1375 213   | 5061 3968       | 0.01     | 0.924049      | 1  | 1.00   | 0.94          | 1.08          | 1.01   | 0.88          | 1.16            |  |
| NHS2       | 22      | 0.205 0.202 | 734 358 56/359 188 21         | 1148 568        | 0.02     | 0.8794497     | 1  | 0.99   | 0.83          | 1.18          | 0.97   | 0.69          | 1.38            |  |
| NOR        | 23      | 0.221 0.219 | 297 179 20/314 175 25         | 496 514         | 0.01     | 0.9172188     | 1  | 0.99   | 0.80          | 1.22          | 0.98   | 0.64          | 1.50            |  |
| PBCS2      | 17      | 0.252 0.258 | 980 644 117/793 540 99        | 1741 1432       | 0.25     | 0.617961      | 1  | 1.03   | 0.92          | 1.15          | 1.06   | 0.85          | 1.33            |  |
| USRT       | 24      | 0.206 0.205 | 626 327 41/495 242 38         | 994 775         | 0.00     | 0.9668565     | 1  | 1.00   | 0.85          | 1.17          | 0.99   | 0.72          | 1.38            |  |
| WHS        | 8       | 0.231 0.214 | 402 245 35/419 230 30         | 682 679         | 1.20     | 0.2729668     | 1  | 0.90   | 0.75          | 1.08          | 0.82   | 0.57          | 1.17            |  |
| PBCS 1+2   | 23      | 0.250 0.252 | 1263 839 142/1183 773 142     | 2244 2098       | 0.03     | 0.8573956     | 1  | 1.01   | 0.92          | 1.11          | 1.02   | 0.84          | 1.23            |  |
| Locus      | Alleles | Chr         | Location                      | Neighborhood    |          |               |    |        |               |               |        |               |                 |  |
| rs12608723 | A G     | 19q13.11    |                               | 38508973        |          |               |    |        |               |               |        |               |                 |  |
| SUBSET     | Rank    | MAF         | Geno Counts                   | Subjects        | score X2 | score p-value | df | het OR | het OR 95% CI | het OR 95% CI | hom OR | hom OR 95% CI | hom OR 95% CI_u |  |
| STAGE1-3   | 15      | 0.136 0.128 | 7995 2464 224/7377 2145 166   | 10683 9688      | 6.24     | 0.0125191     | 1  | 0.93   | 0.88          | 0.98          | 0.86   | 0.77          | 0.97            |  |
| NHS        | 4       | 0.153 0.123 | 819 296 27/877 252 15         | 1142 1144       | 8.68     | 0.0032131     | 1  | 0.78   | 0.65          | 0.92          | 0.60   | 0.43          | 0.84            |  |
| STAGE1-2   | 13      | 0.143 0.126 | 4103 1351 122/4355 1242 94    | 5576 5691       | 14.51    | 1.40E-04      | 1  | 0.86   | 0.80          | 0.93          | 0.74   | 0.64          | 0.87            |  |
| STAGE2     | 16      | 0.140 0.126 | 3284 1055 95/3478 990 79      | 4434 4547       | 7.68     | 0.0055758     | 1  | 0.89   | 0.81          | 0.97          | 0.79   | 0.66          | 0.93            |  |
| CPSII      | 7       | 0.140 0.120 | 398 138 7/417 108 10          | 543 535         | 1.99     | 0.1581368     | 1  | 0.83   | 0.65          | 1.07          | 0.69   | 0.42          | 1.15            |  |
| PBCS1      | 7       | 0.153 0.129 | 364 129 13/510 146 13         | 506 669         | 2.85     | 0.0914868     | 1  | 0.82   | 0.65          | 1.03          | 0.67   | 0.42          | 1.07            |  |
| PLCO       | 19      | 0.132 0.124 | 738 216 21/732 196 20         | 975 948         | 0.51     | 0.4771423     | 1  | 0.94   | 0.78          | 1.13          | 0.87   | 0.60          | 1.27            |  |
| WHI        | 17      | 0.141 0.128 | 1784 572 54/1819 540 36       | 2410 2395       | 3.64     | 0.05646       | 1  | 0.89   | 0.79          | 1.00          | 0.80   | 0.63          | 1.01            |  |
| STAGE3     | 17      | 0.129 0.132 | 3894 1116 102/3022 909 72     | 5112 4003       | 0.23     | 0.6332982     | 1  | 1.02   | 0.94          | 1.11          | 1.04   | 0.88          | 1.24            |  |
| NHS2       | 18      | 0.127 0.122 | 907 259 21/453 118 12         | 1187 583        | 0.17     | 0.6763515     | 1  | 0.96   | 0.77          | 1.18          | 0.91   | 0.60          | 1.39            |  |
| NOR        | 2       | 0.128 0.167 | 380 103 12/356 148 12         | 495 516         | 5.82     | 0.0158319     | 1  | 1.35   | 1.06          | 1.73          | 1.83   | 1.12          | 3.01            |  |
| PBCS2      | 13      | 0.124 0.118 | 1344 368 32/1120 300 20       | 1744 1440       | 0.49     | 0.4838405     | 1  | 0.95   | 0.82          | 1.10          | 0.90   | 0.66          | 1.21            |  |
| USRT       | 20      | 0.138 0.142 | 736 239 17/573 191 15         | 992 779         | 0.13     | 0.715621      | 1  | 1.04   | 0.86          | 1.26          | 1.07   | 0.73          | 1.58            |  |
| WHS        | 20      | 0.135 0.130 | 527 147 20/520 152 13         | 694 685         | 0.13     | 0.7174204     | 1  | 0.96   | 0.78          | 1.19          | 0.92   | 0.60          | 1.42            |  |
| PBCS 1+2   | 9       | 0.130 0.120 | 1706 494 45/1630 440 33       | 2245 2103       | 1.85     | 0.1737514     | 1  | 0.92   | 0.81          | 1.04          | 0.84   | 0.65          | 1.08            |  |
| Locus      | Alleles | Chr         | Location                      | Neighborhood    |          |               |    |        |               |               |        |               |                 |  |
| rs37936    | A G     | 7q21.11     |                               | 79806994        |          |               |    |        |               |               |        |               |                 |  |
| SUBSET     | Rank    | MAF         | Geno Counts                   | Subjects        | score X2 | score p-value | df | het OR | het OR 95% CI | het OR 95% CI | hom OR | hom OR 95% CI | hom OR 95% CI_u |  |
| STAGE1-3   | 16      | 0.384 0.372 | 4045 4861 1609/3800 4343 1365 | 10515 9508      | 6.19     | 0.0128179     | 1  | 0.95   | 0.91          | 0.99          | 0.90   | 0.83          | 0.98            |  |
| NHS        | 11      | 0.400 0.365 | 403 541 178/474 476 171       | 1122 1121       | 5.56     | 0.0184205     | 1  | 0.87   | 0.77          | 0.98          | 0.75   | 0.59          | 0.95            |  |
| STAGE1-2   | 8       | 0.399 0.369 | 1839 2287 833/1982 2203 705   | 4959 4890       | 17.05    | 3.63E-05      | 1  | 0.89   | 0.84          | 0.94          | 0.79   | 0.70          | 0.88            |  |
| STAGE2     | 10      | 0.398 0.371 | 1436 1746 655/1508 1727 534   | 3837 3769       | 11.68    | 0.0006307     | 1  | 0.89   | 0.84          | 0.95          | 0.80   | 0.70          | 0.91            |  |
| CPSII      | 15      | 0.387 0.373 | 199 251 79/202 249 70         | 529 521         | 0.40     | 0.5292391     | 1  | 0.94   | 0.79          | 1.13          | 0.89   | 0.63          | 1.27            |  |
| PLCO       | 22      | 0.378 0.376 | 379 431 146/373 394 147       | 956 914         | 0.01     | 0.9136779     | 1  | 0.99   | 0.87          | 1.13          | 0.99   | 0.76          | 1.27            |  |
| WHI        | 1       | 0.409 0.368 | 858 1064 430/933 1084 317     | 2352 2334       | 15.99    | 6.36E-05      | 1  | 0.85   | 0.78          | 0.92          | 0.72   | 0.61          | 0.84            |  |
| STAGE3     | 14      | 0.372 0.377 | 2013 2359 714/1563 1857 577   | 5086 3997       | 0.36     | 0.5483394     | 1  | 1.02   | 0.96          | 1.08          | 1.04   | 0.92          | 1.17            |  |
| NHS2       | 6       | 0.371 0.396 | 475 529 171/222 272 99        | 1175 593        | 2.12     | 0.1451082     | 1  | 1.11   | 0.96          | 1.28          | 1.23   | 0.93          | 1.63            |  |
| NOR        | 11      | 0.364 0.345 | 202 227 67/221 233 61         | 496 515         | 0.81     | 0.3667994     | 1  | 0.92   | 0.77          | 1.10          | 0.85   | 0.59          | 1.22            |  |
| PBCS2      | 21      | 0.368 0.364 | 706 782 248/568 669 183       | 1736 1420       | 0.09     | 0.7656865     | 1  | 0.98   | 0.89          | 1.09          | 0.97   | 0.79          | 1.19            |  |
| USRT       | 13      | 0.393 0.403 | 356 496 143/283 364 132       | 995 779         | 0.38     | 0.5386629     | 1  | 1.04   | 0.91          | 1.20          | 1.09   | 0.83          | 1.43            |  |

|          |    |             |                         |           |      |           |   |      |      |      |      |      |      |
|----------|----|-------------|-------------------------|-----------|------|-----------|---|------|------|------|------|------|------|
| WHS      | 9  | 0.362 0.379 | 274 325 85 269 319 102  | 684 690   | 0.87 | 0.3509654 | 1 | 1.08 | 0.92 | 1.26 | 1.16 | 0.85 | 1.58 |
| PBCS 1+2 | 21 | 0.367 0.364 | 899 997 310 823 952 266 | 2206 2041 | 0.08 | 0.7786881 | 1 | 0.99 | 0.90 | 1.08 | 0.98 | 0.82 | 1.16 |

| Locus    | Alleles | Chr         | Location                      | Neighborhood     |          |               |    |        |               |               |        |               |                 |
|----------|---------|-------------|-------------------------------|------------------|----------|---------------|----|--------|---------------|---------------|--------|---------------|-----------------|
| rs998592 | G A     | 16p13.13    |                               | 11107179 CLEC16A |          |               |    |        |               |               |        |               |                 |
| SUBSET   | Rank    | MAF         | Geno Counts                   | Subjects         | score X2 | score p-value | df | het OR | het OR 95% CI | het OR 95% CI | hom OR | hom OR 95% CI | hom OR 95% CI_u |
| STAGE1-3 | 17      | 0.426 0.414 | 3559 5120 1981 3270 4814 1604 | 10660 9688       | 5.98     | 0.0144835     | 1  | 0.95   | 0.92          | 0.99          | 0.91   | 0.84          | 0.98            |
| NHS      | 21      | 0.425 0.431 | 405 502 233 349 605 191       | 1140 1145        | 0.19     | 0.6614653     | 1  | 1.03   | 0.91          | 1.15          | 1.05   | 0.83          | 1.33            |
| STAGE1-2 | 17      | 0.439 0.420 | 1803 2653 1118 1861 2884 947  | 5574 5692        | 8.19     | 0.0042147     | 1  | 0.93   | 0.88          | 0.98          | 0.86   | 0.77          | 0.95            |
| STAGE2   | 9       | 0.442 0.417 | 1398 2151 885 1512 2279 756   | 4434 4547        | 11.79    | 0.0005948     | 1  | 0.90   | 0.85          | 0.96          | 0.81   | 0.72          | 0.91            |
| CPSII    | 1       | 0.475 0.415 | 158 254 131 184 258 93        | 543 535          | 7.61     | 0.0058038     | 1  | 0.79   | 0.67          | 0.93          | 0.62   | 0.45          | 0.87            |
| PBCS1    | 3       | 0.415 0.369 | 186 220 100 264 316 89        | 506 669          | 4.89     | 0.0269966     | 1  | 0.83   | 0.70          | 0.98          | 0.69   | 0.50          | 0.96            |
| PLCO     | 21      | 0.419 0.411 | 324 485 166 320 476 152       | 975 948          | 0.23     | 0.6282813     | 1  | 0.97   | 0.85          | 1.10          | 0.94   | 0.72          | 1.22            |
| WHI      | 19      | 0.450 0.433 | 730 1192 488 744 1229 422     | 2410 2395        | 2.88     | 0.0894554     | 1  | 0.93   | 0.86          | 1.01          | 0.87   | 0.74          | 1.02            |
| STAGE3   | 11      | 0.412 0.406 | 1756 2467 864 1410 1932 657   | 5087 3999        | 0.78     | 0.3780469     | 1  | 0.97   | 0.92          | 1.03          | 0.95   | 0.84          | 1.07            |
| NHS2     | 14      | 0.418 0.427 | 394 568 202 192 283 107       | 1164 582         | 0.28     | 0.5938621     | 1  | 1.04   | 0.90          | 1.20          | 1.08   | 0.81          | 1.44            |
| NOR      | 16      | 0.390 0.400 | 186 231 77 187 245 84         | 494 516          | 0.23     | 0.6312113     | 1  | 1.04   | 0.87          | 1.25          | 1.09   | 0.77          | 1.55            |
| PBCS2    | 18      | 0.400 0.394 | 625 849 274 528 682 223       | 1748 1433        | 0.24     | 0.6244272     | 1  | 0.98   | 0.88          | 1.08          | 0.95   | 0.78          | 1.16            |
| USRT     | 6       | 0.439 0.415 | 313 490 192 268 373 136       | 995 777          | 2.06     | 0.1507922     | 1  | 0.91   | 0.79          | 1.04          | 0.82   | 0.63          | 1.07            |
| WHS      | 22      | 0.413 0.407 | 238 329 119 235 349 107       | 686 691          | 0.10     | 0.7514779     | 1  | 0.98   | 0.84          | 1.14          | 0.95   | 0.70          | 1.29            |
| PBCS 1+2 | 7       | 0.403 0.386 | 811 1069 373 791 996 312      | 2253 2099        | 2.58     | 0.1082359     | 1  | 0.93   | 0.86          | 1.02          | 0.87   | 0.73          | 1.03            |

| Locus     | Alleles | Chr         | Location                    | Neighborhood |          |               |    |        |               |               |        |               |                 |
|-----------|---------|-------------|-----------------------------|--------------|----------|---------------|----|--------|---------------|---------------|--------|---------------|-----------------|
| rs7936636 | C T     | 11p11.2     |                             | 44397546     |          |               |    |        |               |               |        |               |                 |
| SUBSET    | Rank    | MAF         | Geno Counts                 | Subjects     | score X2 | score p-value | df | het OR | het OR 95% CI | het OR 95% CI | hom OR | hom OR 95% CI | hom OR 95% CI_u |
| STAGE1-3  | 18      | 0.255 0.245 | 5896 4093 666 5545 3548 599 | 10655 9692   | 5.14     | 0.0233973     | 1  | 0.95   | 0.91          | 0.99          | 0.90   | 0.82          | 0.99            |
| NHS       | 15      | 0.256 0.240 | 635 430 77 673 395 77       | 1142 1145    | 1.51     | 0.2186372     | 1  | 0.92   | 0.81          | 1.05          | 0.85   | 0.65          | 1.10            |
| STAGE1-2  | 14      | 0.263 0.242 | 3003 2205 365 3307 2014 370 | 5573 5691    | 13.51    | 2.38E-04      | 1  | 0.89   | 0.84          | 0.95          | 0.80   | 0.71          | 0.90            |
| STAGE2    | 8       | 0.265 0.243 | 2368 1775 288 2634 1619 293 | 4431 4546    | 12.27    | 0.0004615     | 1  | 0.89   | 0.83          | 0.95          | 0.79   | 0.69          | 0.90            |
| CPSII     | 5       | 0.266 0.233 | 286 224 32 323 175 37       | 542 535      | 3.10     | 0.0784664     | 1  | 0.84   | 0.69          | 1.02          | 0.70   | 0.48          | 1.04            |
| PBCS1     | 12      | 0.247 0.226 | 284 193 28 406 222 40       | 505 668      | 1.32     | 0.2501132     | 1  | 0.89   | 0.74          | 1.08          | 0.80   | 0.55          | 1.17            |
| PLCO      | 15      | 0.263 0.249 | 526 385 64 546 332 70       | 975 948      | 0.99     | 0.3205998     | 1  | 0.93   | 0.81          | 1.07          | 0.86   | 0.65          | 1.15            |
| WHI       | 7       | 0.270 0.247 | 1272 973 164 1359 890 146   | 2409 2395    | 6.86     | 0.0087914     | 1  | 0.88   | 0.81          | 0.97          | 0.78   | 0.65          | 0.94            |
| STAGE3    | 15      | 0.245 0.249 | 2893 1888 301 2238 1535 228 | 5082 4001    | 0.36     | 0.5493139     | 1  | 1.02   | 0.95          | 1.09          | 1.04   | 0.91          | 1.20            |
| NHS2      | 5       | 0.264 0.235 | 630 457 79 344 206 34       | 1166 584     | 3.48     | 0.0619352     | 1  | 0.86   | 0.73          | 1.01          | 0.73   | 0.53          | 1.02            |
| NOR       | 1       | 0.192 0.237 | 326 153 19 301 185 30       | 498 516      | 6.18     | 0.0129382     | 1  | 1.31   | 1.06          | 1.62          | 1.71   | 1.12          | 2.62            |
| PBCS2     | 2       | 0.245 0.264 | 993 643 105 769 569 94      | 1741 1432    | 3.13     | 0.0767626     | 1  | 1.11   | 0.99          | 1.24          | 1.23   | 0.98          | 1.54            |
| USRT      | 9       | 0.254 0.240 | 553 376 64 442 301 37       | 993 780      | 0.86     | 0.3534184     | 1  | 0.93   | 0.79          | 1.09          | 0.86   | 0.63          | 1.18            |
| WHS       | 15      | 0.239 0.247 | 391 259 34 382 274 33       | 684 689      | 0.23     | 0.6283644     | 1  | 1.05   | 0.87          | 1.25          | 1.09   | 0.76          | 1.56            |
| PBCS 1+2  | 15      | 0.245 0.252 | 1277 836 133 1175 790 135   | 2246 2100    | 0.58     | 0.446735      | 1  | 1.04   | 0.94          | 1.14          | 1.08   | 0.89          | 1.31            |

| Locus     | Alleles | Chr         | Location                      | Neighborhood |          |               |    |        |               |               |        |               |                 |
|-----------|---------|-------------|-------------------------------|--------------|----------|---------------|----|--------|---------------|---------------|--------|---------------|-----------------|
| rs3817198 | T C     | 11p15.5     |                               | 1865582 LSP1 |          |               |    |        |               |               |        |               |                 |
| SUBSET    | Rank    | MAF         | Geno Counts                   | Subjects     | score X2 | score p-value | df | het OR | het OR 95% CI | het OR 95% CI | hom OR | hom OR 95% CI | hom OR 95% CI_u |
| STAGE1-3  | 19      | 0.323 0.333 | 4881 4670 1113 4350 4237 1105 | 10664 9692   | 3.93     | 0.047513      | 1  | 1.04   | 1.00          | 1.09          | 1.09   | 1.00          | 1.18            |
| NHS       | 17      | 0.318 0.330 | 524 510 108 514 505 125       | 1142 1144    | 0.78     | 0.3779914     | 1  | 1.06   | 0.93          | 1.20          | 1.12   | 0.87          | 1.44            |
| STAGE1-2  | 20      | 0.326 0.341 | 2533 2438 597 2485 2518 677   | 5568 5680    | 5.41     | 0.0199704     | 1  | 1.07   | 1.01          | 1.13          | 1.14   | 1.02          | 1.27            |
| STAGE2    | 20      | 0.328 0.344 | 2009 1928 489 1971 2013 552   | 4426 4536    | 4.63     | 0.0313851     | 1  | 1.07   | 1.01          | 1.14          | 1.14   | 1.01          | 1.29            |
| CPSII     | 18      | 0.334 0.345 | 243 231 64 235 227 70         | 538 532      | 0.29     | 0.5898289     | 1  | 1.05   | 0.88          | 1.25          | 1.10   | 0.78          | 1.56            |
| PBCS1     | 15      | 0.319 0.333 | 229 228 47 292 299 71         | 504 662      | 0.50     | 0.480964      | 1  | 1.07   | 0.89          | 1.27          | 1.14   | 0.80          | 1.62            |
| PLCO      | 20      | 0.335 0.344 | 440 417 118 397 449 101       | 975 947      | 0.34     | 0.5615328     | 1  | 1.04   | 0.91          | 1.19          | 1.08   | 0.83          | 1.42            |
| WHI       | 15      | 0.326 0.346 | 1097 1052 260 1047 1038 310   | 2409 2395    | 4.14     | 0.0418497     | 1  | 1.09   | 1.00          | 1.19          | 1.19   | 1.01          | 1.41            |
| STAGE3    | 21      | 0.320 0.322 | 2347 2233 516 1859 1722 429   | 5096 4010    | 0.04     | 0.8470494     | 1  | 1.01   | 0.95          | 1.07          | 1.01   | 0.89          | 1.15            |
| NHS2      | 19      | 0.320 0.314 | 538 516 117 285 246 64        | 1171 595     | 0.13     | 0.7203242     | 1  | 0.97   | 0.84          | 1.13          | 0.95   | 0.70          | 1.28            |



|          |    |             |                           |           |      |           |   |      |      |      |      |      |      |
|----------|----|-------------|---------------------------|-----------|------|-----------|---|------|------|------|------|------|------|
| NOR      | 5  | 0.262 0.290 | 269 194 33 258 215 42     | 496 515   | 2.03 | 0.1541213 | 1 | 1.15 | 0.95 | 1.40 | 1.33 | 0.90 | 1.97 |
| PBCS2    | 11 | 0.330 0.339 | 789 789 189 634 637 171   | 1767 1442 | 0.61 | 0.4355697 | 1 | 1.04 | 0.94 | 1.16 | 1.09 | 0.88 | 1.34 |
| USRT     | 7  | 0.338 0.317 | 442 434 119 366 331 81    | 995 778   | 1.68 | 0.1944304 | 1 | 0.91 | 0.79 | 1.05 | 0.83 | 0.63 | 1.10 |
| WHS      | 16 | 0.312 0.320 | 309 300 58 316 293 71     | 667 680   | 0.20 | 0.6517749 | 1 | 1.04 | 0.88 | 1.22 | 1.08 | 0.78 | 1.50 |
| PBCS 1+2 | 14 | 0.328 0.336 | 1019 1016 236 932 933 241 | 2271 2106 | 0.69 | 0.4067724 | 1 | 1.04 | 0.95 | 1.14 | 1.08 | 0.90 | 1.29 |

Locus rs4666451 Alleles G|A Chr 2p24.1 Location 19150424 Neighborhood

| SUBSET   | Rank | MAF         | Geno Counts                   | Subjects  | score X2 | score p-value | df | het OR | het OR 95% CI | het OR 95% CI | hom OR | hom OR 95% CI | hom OR 95% CI_u |
|----------|------|-------------|-------------------------------|-----------|----------|---------------|----|--------|---------------|---------------|--------|---------------|-----------------|
| STAGE1-3 | 20   | 0.391 0.382 | 3546 4486 1479 3251 4055 1238 | 9511 8544 | 3.16     | 0.0754977     | 1  | 0.96   | 0.92          | 1.00          | 0.93   | 0.85          | 1.01            |
| STAGE1-2 | 18   | 0.397 0.377 | 1622 2102 710 1747 2172 628   | 4434 4547 | 7.75     | 0.0053656     | 1  | 0.92   | 0.86          | 0.98          | 0.84   | 0.75          | 0.95            |
| STAGE2   | 15   | 0.397 0.377 | 1622 2102 710 1747 2172 628   | 4434 4547 | 7.75     | 0.0053656     | 1  | 0.92   | 0.86          | 0.98          | 0.84   | 0.75          | 0.95            |
| CPSII    | 21   | 0.394 0.400 | 201 256 86 177 288 70         | 543 535   | 0.08     | 0.7737377     | 1  | 1.03   | 0.86          | 1.23          | 1.05   | 0.74          | 1.50            |
| PBCS1    | 10   | 0.409 0.380 | 176 246 84 257 316 96         | 506 669   | 2.10     | 0.1474606     | 1  | 0.88   | 0.75          | 1.04          | 0.78   | 0.56          | 1.09            |
| PLCO     | 11   | 0.393 0.373 | 355 474 146 363 462 123       | 975 948   | 1.58     | 0.2090776     | 1  | 0.92   | 0.81          | 1.05          | 0.84   | 0.65          | 1.10            |
| WHI      | 8    | 0.397 0.372 | 890 1126 394 950 1106 339     | 2410 2395 | 6.05     | 0.0138784     | 1  | 0.90   | 0.83          | 0.98          | 0.82   | 0.69          | 0.96            |
| STAGE3   | 19   | 0.386 0.388 | 1926 2385 769 1504 1887 610   | 5080 4001 | 0.09     | 0.7680893     | 1  | 1.01   | 0.95          | 1.07          | 1.02   | 0.90          | 1.15            |
| NHS2     | 24   | 0.384 0.385 | 446 528 178 220 273 87        | 1152 580  | 0.01     | 0.9251257     | 1  | 1.01   | 0.87          | 1.16          | 1.01   | 0.76          | 1.35            |
| NOR      | 19   | 0.363 0.355 | 201 230 65 214 238 64         | 496 516   | 0.15     | 0.6980461     | 1  | 0.96   | 0.80          | 1.16          | 0.93   | 0.65          | 1.34            |
| PBCS2    | 7    | 0.399 0.411 | 621 858 268 504 692 247       | 1747 1443 | 0.95     | 0.3297248     | 1  | 1.05   | 0.95          | 1.16          | 1.11   | 0.90          | 1.35            |
| USRT     | 11   | 0.382 0.370 | 389 452 154 309 358 108       | 995 775   | 0.49     | 0.4858466     | 1  | 0.95   | 0.83          | 1.09          | 0.91   | 0.69          | 1.19            |
| WHS      | 17   | 0.380 0.389 | 269 317 104 257 326 104       | 690 687   | 0.19     | 0.6599766     | 1  | 1.03   | 0.89          | 1.21          | 1.07   | 0.79          | 1.45            |
| PBCS 1+2 | 24   | 0.402 0.401 | 795 1103 352 761 1004 343     | 2250 2108 | 0.00     | 0.9465833     | 1  | 1.00   | 0.91          | 1.09          | 0.99   | 0.84          | 1.18            |

Locus rs17740709 Alleles A|G Chr 12q21.31 Location 81947471 Neighborhood TMTC2

| SUBSET   | Rank | MAF         | Geno Counts                 | Subjects   | score X2 | score p-value | df | het OR | het OR 95% CI | het OR 95% CI | hom OR | hom OR 95% CI | hom OR 95% CI_u |
|----------|------|-------------|-----------------------------|------------|----------|---------------|----|--------|---------------|---------------|--------|---------------|-----------------|
| STAGE1-3 | 21   | 0.220 0.214 | 6450 3688 498 6023 3139 502 | 10636 9664 | 2.01     | 0.1563996     | 1  | 0.97   | 0.92          | 1.01          | 0.93   | 0.85          | 1.03            |
| NHS      | 20   | 0.218 0.212 | 692 402 48 725 355 65       | 1142 1145  | 0.26     | 0.61038       | 1  | 0.96   | 0.84          | 1.11          | 0.93   | 0.70          | 1.23            |
| STAGE1-2 | 23   | 0.218 0.214 | 3372 1979 225 3566 1821 305 | 5576 5692  | 0.60     | 0.4372826     | 1  | 0.98   | 0.92          | 1.04          | 0.95   | 0.84          | 1.08            |
| STAGE2   | 23   | 0.218 0.214 | 2680 1577 177 2841 1466 240 | 4434 4547  | 0.38     | 0.5398783     | 1  | 0.98   | 0.91          | 1.05          | 0.96   | 0.83          | 1.10            |
| CPSII    | 12   | 0.215 0.200 | 328 197 18 343 170 22       | 543 535    | 0.72     | 0.3961677     | 1  | 0.91   | 0.74          | 1.13          | 0.83   | 0.54          | 1.27            |
| PBCS1    | 20   | 0.242 0.247 | 282 203 21 383 241 45       | 506 669    | 0.09     | 0.7654517     | 1  | 1.03   | 0.85          | 1.25          | 1.06   | 0.72          | 1.56            |
| PLCO     | 18   | 0.214 0.203 | 603 326 46 610 291 47       | 975 948    | 0.72     | 0.3954255     | 1  | 0.94   | 0.80          | 1.09          | 0.88   | 0.64          | 1.19            |
| WHI      | 23   | 0.215 0.212 | 1467 851 92 1505 764 126    | 2410 2395  | 0.10     | 0.7536695     | 1  | 0.98   | 0.89          | 1.09          | 0.97   | 0.80          | 1.18            |
| STAGE3   | 9    | 0.223 0.216 | 3078 1710 273 2458 1320 197 | 5061 3975  | 1.35     | 0.2455577     | 1  | 0.96   | 0.89          | 1.03          | 0.92   | 0.80          | 1.06            |
| NHS2     | 21   | 0.211 0.207 | 723 368 59 356 190 23       | 1150 569   | 0.07     | 0.792619      | 1  | 0.98   | 0.82          | 1.16          | 0.95   | 0.68          | 1.35            |
| NOR      | 4    | 0.243 0.205 | 281 187 27 328 161 25       | 495 514    | 4.20     | 0.0404998     | 1  | 0.80   | 0.65          | 0.99          | 0.65   | 0.42          | 0.98            |
| PBCS2    | 14   | 0.234 0.240 | 1042 597 112 836 508 91     | 1751 1435  | 0.30     | 0.5842063     | 1  | 1.03   | 0.92          | 1.16          | 1.07   | 0.85          | 1.34            |
| USRT     | 8    | 0.212 0.195 | 612 339 41 501 250 27       | 992 778    | 1.55     | 0.2132337     | 1  | 0.90   | 0.76          | 1.06          | 0.81   | 0.58          | 1.13            |
| WHS      | 12   | 0.213 0.201 | 420 219 34 437 211 31       | 673 679    | 0.59     | 0.4411392     | 1  | 0.93   | 0.77          | 1.12          | 0.87   | 0.60          | 1.25            |
| PBCS 1+2 | 17   | 0.236 0.243 | 1324 799 133 1218 747 136   | 2256 2101  | 0.49     | 0.4849139     | 1  | 1.04   | 0.94          | 1.14          | 1.07   | 0.88          | 1.30            |

Locus rs2391406 Alleles T|G Chr 13q33.3 Location 106586873 Neighborhood

| SUBSET   | Rank | MAF         | Geno Counts                   | Subjects   | score X2 | score p-value | df | het OR | het OR 95% CI | het OR 95% CI | hom OR | hom OR 95% CI | hom OR 95% CI_u |
|----------|------|-------------|-------------------------------|------------|----------|---------------|----|--------|---------------|---------------|--------|---------------|-----------------|
| STAGE1-3 | 22   | 0.370 0.364 | 4275 4832 1520 3852 4575 1220 | 10627 9647 | 2.01     | 0.1567447     | 1  | 0.97   | 0.93          | 1.01          | 0.94   | 0.87          | 1.02            |
| NHS      | 19   | 0.372 0.363 | 452 529 160 460 538 146       | 1141 1144  | 0.43     | 0.5143213     | 1  | 0.96   | 0.85          | 1.08          | 0.92   | 0.73          | 1.17            |
| STAGE1-2 | 19   | 0.374 0.358 | 2234 2499 830 2289 2719 675   | 5563 5683  | 6.06     | 0.0138373     | 1  | 0.93   | 0.88          | 0.99          | 0.87   | 0.78          | 0.97            |
| STAGE2   | 18   | 0.374 0.357 | 1782 1970 670 1829 2181 529   | 4422 4539  | 5.89     | 0.0152441     | 1  | 0.93   | 0.87          | 0.99          | 0.86   | 0.76          | 0.97            |
| CPSII    | 3    | 0.371 0.333 | 217 240 79 228 251 51         | 536 530    | 3.45     | 0.0632621     | 1  | 0.84   | 0.71          | 1.01          | 0.71   | 0.50          | 1.02            |
| PBCS1    | 17   | 0.387 0.374 | 195 230 81 242 351 74         | 506 667    | 0.45     | 0.5000706     | 1  | 0.94   | 0.79          | 1.12          | 0.89   | 0.63          | 1.25            |
| PLCO     | 8    | 0.376 0.350 | 398 416 157 393 445 109       | 971 947    | 2.69     | 0.1009285     | 1  | 0.90   | 0.79          | 1.02          | 0.80   | 0.62          | 1.04            |
| WHI      | 20   | 0.372 0.360 | 972 1084 353 966 1134 295     | 2409 2395  | 1.39     | 0.2387003     | 1  | 0.95   | 0.88          | 1.03          | 0.91   | 0.77          | 1.07            |

|          |    |             |                             |           |      |           |   |      |      |      |      |      |      |
|----------|----|-------------|-----------------------------|-----------|------|-----------|---|------|------|------|------|------|------|
| STAGE3   | 13 | 0.367 0.372 | 2041 2337 690 1563 1858 545 | 5068 3966 | 0.47 | 0.4946554 | 1 | 1.02 | 0.96 | 1.09 | 1.04 | 0.92 | 1.18 |
| NHS2     | 1  | 0.344 0.386 | 510 503 148 219 279 86      | 1161 584  | 5.82 | 0.0158058 | 1 | 1.19 | 1.03 | 1.38 | 1.43 | 1.07 | 1.90 |
| NOR      | 21 | 0.366 0.372 | 207 214 74 201 245 69       | 495 515   | 0.08 | 0.7758132 | 1 | 1.03 | 0.86 | 1.23 | 1.05 | 0.74 | 1.51 |
| PBCS2    | 23 | 0.380 0.382 | 656 853 236/542 686 203     | 1745 1431 | 0.02 | 0.8752505 | 1 | 1.01 | 0.91 | 1.12 | 1.02 | 0.83 | 1.25 |
| USRT     | 21 | 0.359 0.365 | 410 454 130/309 368 99      | 994 776   | 0.12 | 0.7329807 | 1 | 1.02 | 0.89 | 1.18 | 1.05 | 0.80 | 1.38 |
| WHS      | 1  | 0.384 0.345 | 258 313 102/292 280 88      | 673 660   | 4.13 | 0.0421697 | 1 | 0.85 | 0.73 | 0.99 | 0.73 | 0.53 | 0.99 |
| PBCS 1+2 | 22 | 0.381 0.379 | 851 1079 317/784 1035 277   | 2247 2096 | 0.04 | 0.836186  | 1 | 0.99 | 0.91 | 1.08 | 0.98 | 0.82 | 1.17 |

Locus Alleles Chr Location Neighborhood  
rs7121523 G|A 11p15.4 7556781 PPFIBP2

| SUBSET   | Rank | MAF         | Geno Counts                 | Subjects   | score X2 | score p-value | df | het OR | het OR 95% CI | het OR 95% CI | hom OR | hom OR 95% CI | hom OR 95% CI_u |
|----------|------|-------------|-----------------------------|------------|----------|---------------|----|--------|---------------|---------------|--------|---------------|-----------------|
| STAGE1-3 | 23   | 0.159 0.163 | 7513 2919 235/6829 2540 303 | 10667 9672 | 1.07     | 0.3009646     | 1  | 1.03   | 0.98          | 1.08          | 1.06   | 0.95          | 1.18            |
| NHS      | 16   | 0.158 0.169 | 808 306 28/810 283 52       | 1142 1145  | 0.87     | 0.3511966     | 1  | 1.08   | 0.92          | 1.25          | 1.16   | 0.85          | 1.57            |
| STAGE1-2 | 22   | 0.156 0.164 | 3941 1525 106/4028 1461 200 | 5572 5689  | 2.45     | 0.1173932     | 1  | 1.06   | 0.99          | 1.14          | 1.12   | 0.97          | 1.29            |
| STAGE2   | 22   | 0.155 0.162 | 3133 1219 78/3218 1178 148  | 4430 4544  | 1.65     | 0.1994573     | 1  | 1.05   | 0.97          | 1.14          | 1.11   | 0.95          | 1.30            |
| CPSII    | 22   | 0.173 0.177 | 368 161 13/366 147 21       | 542 534    | 0.07     | 0.7862091     | 1  | 1.03   | 0.83          | 1.29          | 1.06   | 0.68          | 1.66            |
| PBCS1    | 11   | 0.138 0.156 | 373 123 8/481 165 22        | 504 668    | 1.52     | 0.2177102     | 1  | 1.15   | 0.92          | 1.45          | 1.33   | 0.84          | 2.11            |
| PLCO     | 16   | 0.156 0.166 | 688 270 17/661 259 28       | 975 948    | 0.76     | 0.3830785     | 1  | 1.08   | 0.91          | 1.29          | 1.17   | 0.82          | 1.65            |
| WHI      | 22   | 0.155 0.159 | 1704 665 40/1710 607 77     | 2409 2394  | 0.34     | 0.5609315     | 1  | 1.03   | 0.93          | 1.15          | 1.07   | 0.86          | 1.33            |
| STAGE3   | 23   | 0.162 0.161 | 3572 1394 128/2801 1080 103 | 5094 3984  | 0.01     | 0.9188316     | 1  | 1.00   | 0.92          | 1.08          | 0.99   | 0.85          | 1.16            |
| NHS2     | 12   | 0.167 0.160 | 811 332 30/418 149 19       | 1173 586   | 0.32     | 0.5709644     | 1  | 0.95   | 0.78          | 1.14          | 0.90   | 0.61          | 1.31            |
| NOR      | 20   | 0.172 0.177 | 342 136 17/347 147 17       | 495 511    | 0.10     | 0.7530337     | 1  | 1.04   | 0.83          | 1.30          | 1.08   | 0.68          | 1.70            |
| PBCS2    | 20   | 0.148 0.151 | 1266 440 38/1023 369 31     | 1744 1423  | 0.15     | 0.6965573     | 1  | 1.03   | 0.89          | 1.18          | 1.06   | 0.80          | 1.40            |
| USRT     | 19   | 0.177 0.172 | 668 301 25/527 223 21       | 994 771    | 0.14     | 0.7106547     | 1  | 0.97   | 0.81          | 1.16          | 0.93   | 0.65          | 1.34            |
| WHS      | 24   | 0.161 0.160 | 485 185 18/486 192 15       | 688 693    | 0.00     | 0.974848      | 1  | 1.00   | 0.81          | 1.22          | 0.99   | 0.66          | 1.50            |
| PBCS 1+2 | 13   | 0.146 0.153 | 1639 563 47/1504 533 53     | 2249 2090  | 0.79     | 0.3755046     | 1  | 1.05   | 0.94          | 1.19          | 1.11   | 0.88          | 1.41            |

Locus Alleles Chr Location Neighborhood  
rs11077820 T|C 17q25.1 71966263 UBE2O,AANAT

| SUBSET   | Rank | MAF         | Geno Counts                   | Subjects   | score X2 | score p-value | df | het OR | het OR 95% CI | het OR 95% CI | hom OR | hom OR 95% CI | hom OR 95% CI_u |
|----------|------|-------------|-------------------------------|------------|----------|---------------|----|--------|---------------|---------------|--------|---------------|-----------------|
| STAGE1-3 | 24   | 0.370 0.365 | 4214 4964 1454/3948 4367 1348 | 10632 9663 | 0.97     | 0.3257485     | 1  | 0.98   | 0.94          | 1.02          | 0.96   | 0.89          | 1.04            |
| NHS      | 18   | 0.382 0.370 | 429 553 160/475 492 178       | 1142 1145  | 0.67     | 0.4115727     | 1  | 0.95   | 0.85          | 1.07          | 0.91   | 0.72          | 1.15            |
| STAGE1-2 | 21   | 0.380 0.368 | 2081 2738 750/2321 2552 815   | 5569 5688  | 4.00     | 0.0453871     | 1  | 0.95   | 0.90          | 1.00          | 0.90   | 0.80          | 1.00            |
| STAGE2   | 21   | 0.380 0.367 | 1652 2185 590/1846 2060 637   | 4427 4543  | 3.33     | 0.0678293     | 1  | 0.94   | 0.89          | 1.00          | 0.89   | 0.79          | 1.01            |
| CPSII    | 23   | 0.377 0.374 | 216 242 83/205 260 70         | 541 535    | 0.02     | 0.8766975     | 1  | 0.99   | 0.83          | 1.17          | 0.97   | 0.69          | 1.38            |
| PBCS1    | 13   | 0.375 0.353 | 193 244 67/284 298 87         | 504 669    | 1.23     | 0.2673919     | 1  | 0.91   | 0.77          | 1.08          | 0.83   | 0.59          | 1.16            |
| PLCO     | 14   | 0.371 0.355 | 371 484 120/395 430 121       | 975 946    | 1.11     | 0.2925605     | 1  | 0.93   | 0.81          | 1.06          | 0.87   | 0.66          | 1.13            |
| WHI      | 21   | 0.385 0.374 | 872 1215 320/962 1072 359     | 2407 2393  | 1.32     | 0.2501362     | 1  | 0.95   | 0.88          | 1.03          | 0.91   | 0.77          | 1.07            |
| STAGE3   | 18   | 0.359 0.362 | 2133 2225 705/1628 1817 533   | 5063 3978  | 0.22     | 0.6423297     | 1  | 1.01   | 0.96          | 1.08          | 1.03   | 0.91          | 1.16            |
| NHS2     | 13   | 0.364 0.373 | 470 516 158/227 268 81        | 1144 576   | 0.30     | 0.5838094     | 1  | 1.04   | 0.90          | 1.20          | 1.08   | 0.81          | 1.45            |
| NOR      | 15   | 0.329 0.316 | 225 216 55/233 237 44         | 496 514    | 0.37     | 0.5430243     | 1  | 0.94   | 0.78          | 1.14          | 0.89   | 0.61          | 1.30            |
| PBCS2    | 4    | 0.359 0.375 | 732 784 238/563 671 204       | 1754 1438  | 1.71     | 0.1909305     | 1  | 1.07   | 0.97          | 1.18          | 1.14   | 0.93          | 1.40            |
| USRT     | 14   | 0.371 0.380 | 405 441 148/303 353 118       | 994 774    | 0.34     | 0.5598592     | 1  | 1.04   | 0.91          | 1.19          | 1.08   | 0.83          | 1.42            |
| WHS      | 10   | 0.356 0.340 | 301 268 106/302 288 86        | 675 676    | 0.64     | 0.423961      | 1  | 0.94   | 0.81          | 1.09          | 0.88   | 0.65          | 1.20            |
| PBCS 1+2 | 18   | 0.362 0.368 | 925 1029 304/846 967 291      | 2258 2104  | 0.29     | 0.5883833     | 1  | 1.02   | 0.94          | 1.12          | 1.05   | 0.88          | 1.25            |

#### unadj\_rec

Locus Alleles Chr Location Neighborhood  
rs999737 C|T 14q24.1 68104435 RAD51L1

| SUBSET   | Rank | MAF         | Geno Counts                 | Subjects   | score X2 | score p-value | df | hom OR | hom OR 95% CI | hom OR 95% CI_u |
|----------|------|-------------|-----------------------------|------------|----------|---------------|----|--------|---------------|-----------------|
| STAGE1-3 | 1    | 0.239 0.218 | 6217 3775 655/5890 3353 435 | 10647 9678 | 27.43    | 1.63E-07      | 1  | 0.72   | 0.63          | 0.81            |
| NHS      | 6    | 0.244 0.213 | 660 406 76/703 394 47       | 1142 1144  | 7.28     | 0.0069729     | 1  | 0.60   | 0.41          | 0.87            |
| STAGE1-2 | 5    | 0.238 0.213 | 3263 1972 341/3506 1947 237 | 5576 5690  | 22.01    | 2.72E-06      | 1  | 0.67   | 0.56          | 0.79            |
| STAGE2   | 6    | 0.236 0.213 | 2603 1566 265/2803 1553 190 | 4434 4546  | 15.07    | 1.04E-04      | 1  | 0.69   | 0.57          | 0.83            |

|          |    |             |                             |           |      |           |   |      |      |      |
|----------|----|-------------|-----------------------------|-----------|------|-----------|---|------|------|------|
| CPSII    | 21 | 0.235 0.222 | 319 193 31 325 182 28       | 543 535   | 0.12 | 0.7315277 | 1 | 0.91 | 0.54 | 1.54 |
| PBCS1    | 8  | 0.242 0.213 | 291 185 30 409 234 25       | 506 668   | 3.08 | 0.0791615 | 1 | 0.62 | 0.36 | 1.06 |
| PLCO     | 3  | 0.238 0.215 | 576 334 65 576 336 36       | 975 948   | 7.95 | 0.004805  | 1 | 0.55 | 0.36 | 0.84 |
| WHI      | 7  | 0.235 0.209 | 1417 854 139 1493 801 101   | 2410 2395 | 6.09 | 0.0136274 | 1 | 0.72 | 0.55 | 0.94 |
| STAGE3   | 2  | 0.240 0.226 | 2955 1806 314 2386 1408 197 | 5075 3991 | 6.57 | 0.0103446 | 1 | 0.79 | 0.66 | 0.95 |
| NHS2     | 7  | 0.232 0.226 | 698 374 81 350 195 33       | 1153 578  | 1.08 | 0.297918  | 1 | 0.80 | 0.53 | 1.22 |
| NOR      | 6  | 0.257 0.215 | 271 195 30 319 171 25       | 496 515   | 0.70 | 0.4027061 | 1 | 0.79 | 0.46 | 1.37 |
| PBCS2    | 7  | 0.236 0.226 | 1016 637 94 850 514 66      | 1747 1430 | 0.96 | 0.3264591 | 1 | 0.85 | 0.62 | 1.18 |
| USRT     | 15 | 0.243 0.232 | 572 357 62 459 275 43       | 991 777   | 0.41 | 0.523679  | 1 | 0.88 | 0.59 | 1.31 |
| WHS      | 2  | 0.245 0.226 | 398 243 47 408 253 30       | 688 691   | 4.05 | 0.0440679 | 1 | 0.62 | 0.39 | 0.99 |
| PBCS 1+2 | 1  | 0.237 0.222 | 1306 819 124 1257 746 92    | 2249 2095 | 2.89 | 0.0891028 | 1 | 0.79 | 0.60 | 1.04 |

Locus Alleles Chr Location Neighborhood  
rs11249433 T|C 1p11.2 120982136 LOC647121

| SUBSET   | Rank | MAF         | Geno Counts                   | Subjects   | score X2 | score p-value | df | hom OR | hom OR 95% ( | hom OR 95% CI_u |
|----------|------|-------------|-------------------------------|------------|----------|---------------|----|--------|--------------|-----------------|
| STAGE1-3 | 2    | 0.393 0.425 | 3965 4951 1699 3207 4650 1761 | 10615 9618 | 18.89    | 1.38E-05      | 1  | 1.18   | 1.09         | 1.27            |
| NHS      | 3    | 0.388 0.440 | 425 541 170 358 563 220       | 1136 1141  | 7.47     | 0.006265      | 1  | 1.36   | 1.09         | 1.69            |
| STAGE1-2 | 16   | 0.401 0.431 | 2022 2615 919 1821 2814 1036  | 5556 5671  | 5.83     | 0.0157988     | 1  | 1.13   | 1.02         | 1.24            |
| STAGE2   | 18   | 0.404 0.429 | 1597 2074 749 1463 2251 816   | 4420 4530  | 1.77     | 0.183747      | 1  | 1.08   | 0.97         | 1.20            |
| CPSII    | 22   | 0.378 0.417 | 220 235 88 178 267 89         | 543 534    | 0.04     | 0.8384707     | 1  | 1.03   | 0.75         | 1.43            |
| PBCS1    | 19   | 0.387 0.393 | 195 230 81 243 326 100        | 506 669    | 0.25     | 0.6181265     | 1  | 0.92   | 0.67         | 1.27            |
| PLCO     | 23   | 0.420 0.421 | 324 476 169 315 465 165       | 969 945    | 0.00     | 0.9909615     | 1  | 1.00   | 0.79         | 1.27            |
| WHI      | 14   | 0.407 0.444 | 858 1133 411 727 1193 462     | 2402 2382  | 4.18     | 0.0407887     | 1  | 1.17   | 1.01         | 1.35            |
| STAGE3   | 1    | 0.385 0.416 | 1947 2338 780 1386 1836 725   | 5065 3947  | 14.05    | 1.78E-04      | 1  | 1.24   | 1.11         | 1.38            |
| NHS2     | 2    | 0.400 0.442 | 433 545 197 190 259 124       | 1175 573   | 6.10     | 0.0134816     | 1  | 1.37   | 1.07         | 1.76            |
| NOR      | 1    | 0.380 0.408 | 184 242 66 180 244 86         | 492 510    | 2.31     | 0.1282403     | 1  | 1.31   | 0.92         | 1.85            |
| PBCS2    | 1    | 0.362 0.398 | 719 778 240 518 661 231       | 1737 1410  | 4.03     | 0.0447878     | 1  | 1.22   | 1.00         | 1.49            |
| USRT     | 16   | 0.385 0.410 | 387 443 159 271 371 132       | 989 774    | 0.30     | 0.5832635     | 1  | 1.07   | 0.83         | 1.38            |
| WHS      | 1    | 0.421 0.445 | 224 330 118 227 301 152       | 672 680    | 4.86     | 0.0275009     | 1  | 1.35   | 1.03         | 1.77            |
| PBCS 1+2 | 4    | 0.368 0.397 | 910 1006 321 761 987 331      | 2237 2079  | 2.08     | 0.149715      | 1  | 1.13   | 0.96         | 1.34            |

Locus Alleles Chr Location Neighborhood  
rs7121523 G|A 11p15.4 7556781 PPFIBP2

| SUBSET   | Rank | MAF         | Geno Counts                 | Subjects   | score X2 | score p-value | df | hom OR | hom OR 95% ( | hom OR 95% CI_u |
|----------|------|-------------|-----------------------------|------------|----------|---------------|----|--------|--------------|-----------------|
| STAGE1-3 | 3    | 0.159 0.163 | 7513 2919 235 6829 2540 303 | 10667 9672 | 17.03    | 3.69E-05      | 1  | 1.44   | 1.21         | 1.71            |
| NHS      | 4    | 0.158 0.169 | 808 306 28 810 283 52       | 1142 1145  | 7.40     | 0.0065373     | 1  | 1.89   | 1.19         | 3.02            |
| STAGE1-2 | 1    | 0.156 0.164 | 3941 1525 106 4028 1461 200 | 5572 5689  | 27.71    | 1.41E-07      | 1  | 1.88   | 1.48         | 2.38            |
| STAGE2   | 2    | 0.155 0.162 | 3133 1219 78 3218 1178 148  | 4430 4544  | 20.46    | 6.10E-06      | 1  | 1.88   | 1.42         | 2.48            |
| CPSII    | 6    | 0.173 0.177 | 368 161 13 366 147 21       | 542 534    | 2.07     | 0.1503527     | 1  | 1.67   | 0.83         | 3.36            |
| PBCS1    | 6    | 0.138 0.156 | 373 123 8 481 165 22        | 504 668    | 3.35     | 0.0671051     | 1  | 2.11   | 0.93         | 4.78            |
| PLCO     | 5    | 0.156 0.166 | 688 270 17 661 259 28       | 975 948    | 3.08     | 0.0792945     | 1  | 1.72   | 0.93         | 3.15            |
| WHI      | 2    | 0.155 0.159 | 1704 665 40 1710 607 77     | 2409 2394  | 12.23    | 0.00047       | 1  | 1.97   | 1.34         | 2.90            |
| STAGE3   | 20   | 0.162 0.161 | 3572 1394 128 2801 1080 103 | 5094 3984  | 0.05     | 0.8274885     | 1  | 1.03   | 0.79         | 1.34            |
| NHS2     | 12   | 0.167 0.160 | 811 332 30 418 149 19       | 1173 586   | 0.68     | 0.4107414     | 1  | 1.28   | 0.71         | 2.29            |
| NOR      | 22   | 0.172 0.177 | 342 136 17 347 147 17       | 495 511    | 0.01     | 0.9248242     | 1  | 0.97   | 0.49         | 1.92            |
| PBCS2    | 24   | 0.148 0.151 | 1266 440 38 1023 369 31     | 1744 1423  | -        | 0.9993835     | 1  | 1.00   | 0.62         | 1.62            |
| USRT     | 19   | 0.177 0.172 | 668 301 25 527 223 21       | 994 771    | 0.07     | 0.7849397     | 1  | 1.09   | 0.60         | 1.95            |
| WHS      | 16   | 0.161 0.160 | 485 185 18 486 192 15       | 688 693    | 0.30     | 0.5825651     | 1  | 0.82   | 0.41         | 1.65            |
| PBCS 1+2 | 8    | 0.146 0.153 | 1639 563 47 1504 533 53     | 2249 2090  | 0.96     | 0.3278597     | 1  | 1.22   | 0.82         | 1.81            |

Locus Alleles Chr Location Neighborhood  
rs998592 G|A 16p13.13 11107179 CLEC16A

| SUBSET   | Rank | MAF         | Geno Counts                   | Subjects   | score X2 | score p-value | df | hom OR | hom OR 95% ( | hom OR 95% CI_u |
|----------|------|-------------|-------------------------------|------------|----------|---------------|----|--------|--------------|-----------------|
| STAGE1-3 | 4    | 0.426 0.414 | 3559 5120 1981 3270 4814 1604 | 10660 9688 | 14.37    | 1.51E-04      | 1  | 0.87   | 0.81         | 0.93            |

|          |    |             |                              |           |       |           |   |      |      |      |
|----------|----|-------------|------------------------------|-----------|-------|-----------|---|------|------|------|
| NHS      | 8  | 0.425 0.431 | 405 502 233 349 605 191      | 1140 1145 | 5.34  | 0.0208839 | 1 | 0.78 | 0.63 | 0.96 |
| STAGE1-2 | 6  | 0.439 0.420 | 1803 2653 1118 1861 2884 947 | 5574 5692 | 22.00 | 2.72E-06  | 1 | 0.80 | 0.72 | 0.88 |
| STAGE2   | 4  | 0.442 0.417 | 1398 2151 885 1512 2279 756  | 4434 4547 | 16.70 | 4.38E-05  | 1 | 0.80 | 0.72 | 0.89 |
| CPSII    | 1  | 0.475 0.415 | 158 254 131 184 258 93       | 543 535   | 7.44  | 0.0063743 | 1 | 0.66 | 0.49 | 0.89 |
| PBCS1    | 1  | 0.415 0.369 | 186 220 100 264 316 89       | 506 669   | 8.91  | 0.002843  | 1 | 0.62 | 0.46 | 0.85 |
| PLCO     | 14 | 0.419 0.411 | 324 485 166 320 476 152      | 975 948   | 0.34  | 0.5583205 | 1 | 0.93 | 0.73 | 1.18 |
| WHI      | 11 | 0.450 0.433 | 730 1192 488 744 1229 422    | 2410 2395 | 5.41  | 0.0200467 | 1 | 0.84 | 0.73 | 0.97 |
| STAGE3   | 12 | 0.412 0.406 | 1756 2467 864 1410 1932 657  | 5087 3999 | 0.50  | 0.4815054 | 1 | 0.96 | 0.86 | 1.07 |
| NHS2     | 17 | 0.418 0.427 | 394 568 202 192 283 107      | 1164 582  | 0.28  | 0.5946674 | 1 | 1.07 | 0.83 | 1.39 |
| NOR      | 20 | 0.390 0.400 | 186 231 77 187 245 84        | 494 516   | 0.09  | 0.7639226 | 1 | 1.05 | 0.75 | 1.48 |
| PBCS2    | 22 | 0.400 0.394 | 625 849 274 528 682 223      | 1748 1433 | 0.01  | 0.9302224 | 1 | 0.99 | 0.82 | 1.20 |
| USRT     | 10 | 0.439 0.415 | 313 490 192 268 373 136      | 995 777   | 0.93  | 0.3348225 | 1 | 0.89 | 0.70 | 1.13 |
| WHS      | 12 | 0.413 0.407 | 238 329 119 235 349 107      | 686 691   | 0.87  | 0.3509248 | 1 | 0.87 | 0.66 | 1.16 |
| PBCS 1+2 | 3  | 0.403 0.386 | 811 1069 373 791 996 312     | 2253 2099 | 2.34  | 0.1257495 | 1 | 0.88 | 0.75 | 1.04 |

Locus Alleles Chr Location Neighborhood  
rs2391406 T|G 13q33.3 106586873

| SUBSET   | Rank | MAF         | Geno Counts                   | Subjects   | score X2 | score p-value | df | hom OR | hom OR 95% CI | hom OR 95% CI_u |
|----------|------|-------------|-------------------------------|------------|----------|---------------|----|--------|---------------|-----------------|
| STAGE1-3 | 5    | 0.370 0.364 | 4275 4832 1520 3852 4575 1220 | 10627 9647 | 11.88    | 0.0005689     | 1  | 0.87   | 0.80          | 0.94            |
| NHS      | 17   | 0.372 0.363 | 452 529 160 460 538 146       | 1141 1144  | 0.78     | 0.3763414     | 1  | 0.90   | 0.70          | 1.14            |
| STAGE1-2 | 4    | 0.374 0.358 | 2234 2499 830 2289 2719 675   | 5563 5683  | 22.45    | 2.16E-06      | 1  | 0.77   | 0.69          | 0.86            |
| STAGE2   | 1    | 0.374 0.357 | 1782 1970 670 1829 2181 529   | 4422 4539  | 23.63    | 1.17E-06      | 1  | 0.74   | 0.65          | 0.83            |
| CPSII    | 2    | 0.371 0.333 | 217 240 79 228 251 51         | 536 530    | 6.51     | 0.0107011     | 1  | 0.62   | 0.42          | 0.90            |
| PBCS1    | 2    | 0.387 0.374 | 195 230 81 242 351 74         | 506 667    | 6.06     | 0.0138501     | 1  | 0.65   | 0.47          | 0.92            |
| PLCO     | 2    | 0.376 0.350 | 398 416 157 393 445 109       | 971 947    | 8.71     | 0.0031623     | 1  | 0.67   | 0.52          | 0.88            |
| WHI      | 10   | 0.372 0.360 | 972 1084 353 966 1134 295     | 2409 2395  | 5.62     | 0.0177928     | 1  | 0.82   | 0.69          | 0.97            |
| STAGE3   | 21   | 0.367 0.372 | 2041 2337 690 1563 1858 545   | 5068 3966  | 0.03     | 0.8616058     | 1  | 1.01   | 0.90          | 1.14            |
| NHS2     | 4    | 0.344 0.386 | 510 503 148 219 279 86        | 1161 584   | 1.31     | 0.2524409     | 1  | 1.18   | 0.89          | 1.57            |
| NOR      | 10   | 0.366 0.372 | 207 214 74 201 245 69         | 495 515    | 0.50     | 0.4795625     | 1  | 0.88   | 0.62          | 1.25            |
| PBCS2    | 14   | 0.380 0.382 | 656 853 236 542 686 203       | 1745 1431  | 0.29     | 0.5909579     | 1  | 1.06   | 0.86          | 1.29            |
| USRT     | 21   | 0.359 0.365 | 410 454 130 309 368 99        | 994 776    | 0.04     | 0.8418715     | 1  | 0.97   | 0.73          | 1.29            |
| WHS      | 11   | 0.384 0.345 | 258 313 102 292 280 88        | 673 660    | 0.91     | 0.3412424     | 1  | 0.86   | 0.63          | 1.17            |
| PBCS 1+2 | 10   | 0.381 0.379 | 851 1079 317 784 1035 277     | 2247 2096  | 0.73     | 0.39259       | 1  | 0.93   | 0.78          | 1.10            |

Locus Alleles Chr Location Neighborhood  
rs7716600 C|A 5p12 44910762

| SUBSET   | Rank | MAF         | Geno Counts                 | Subjects   | score X2 | score p-value | df | hom OR | hom OR 95% CI | hom OR 95% CI_u |
|----------|------|-------------|-----------------------------|------------|----------|---------------|----|--------|---------------|-----------------|
| STAGE1-3 | 6    | 0.221 0.241 | 6483 3665 524 5603 3498 581 | 10672 9682 | 11.76    | 0.0006038     | 1  | 1.24   | 1.10          | 1.40            |
| NHS      | 1    | 0.215 0.249 | 693 402 44 652 415 78       | 1139 1145  | 9.82     | 0.001724      | 1  | 1.82   | 1.25          | 2.66            |
| STAGE1-2 | 2    | 0.216 0.243 | 3402 1924 241 3288 2028 370 | 5567 5686  | 25.99    | 3.43E-07      | 1  | 1.54   | 1.30          | 1.82            |
| STAGE2   | 3    | 0.216 0.242 | 2709 1522 197 2636 1613 292 | 4428 4541  | 17.07    | 3.60E-05      | 1  | 1.48   | 1.23          | 1.78            |
| CPSII    | 12   | 0.225 0.236 | 325 192 26 315 186 33       | 543 534    | 1.01     | 0.3156603     | 1  | 1.31   | 0.77          | 2.22            |
| PBCS1    | 7    | 0.217 0.263 | 308 173 23 362 256 47       | 504 665    | 3.19     | 0.0739202     | 1  | 1.59   | 0.95          | 2.66            |
| PLCO     | 7    | 0.223 0.238 | 577 359 37 546 353 49       | 973 948    | 2.10     | 0.1477362     | 1  | 1.38   | 0.89          | 2.13            |
| WHI      | 4    | 0.212 0.239 | 1499 798 111 1413 818 163   | 2408 2394  | 10.79    | 0.0010206     | 1  | 1.51   | 1.18          | 1.94            |
| STAGE3   | 14   | 0.226 0.237 | 3081 1743 283 2314 1473 210 | 5107 3997  | 0.36     | 0.5475275     | 1  | 0.95   | 0.79          | 1.14            |
| NHS2     | 9    | 0.227 0.235 | 712 397 69 338 219 28       | 1178 585   | 0.86     | 0.3530535     | 1  | 0.81   | 0.51          | 1.27            |
| NOR      | 7    | 0.246 0.241 | 284 178 33 293 191 28       | 495 512    | 0.63     | 0.4256534     | 1  | 0.81   | 0.48          | 1.36            |
| PBCS2    | 13   | 0.223 0.231 | 1070 586 98 847 518 74      | 1754 1439  | 0.31     | 0.57964       | 1  | 0.92   | 0.67          | 1.25            |
| USRT     | 3    | 0.216 0.253 | 604 350 39 430 293 49       | 993 772    | 5.37     | 0.0205108     | 1  | 1.66   | 1.08          | 2.55            |
| WHS      | 4    | 0.233 0.228 | 411 232 44 406 252 31       | 687 689    | 2.42     | 0.1195371     | 1  | 0.69   | 0.43          | 1.10            |
| PBCS 1+2 | 16   | 0.221 0.241 | 1378 757 121 1210 771 122   | 2256 2103  | 0.40     | 0.5290376     | 1  | 1.09   | 0.84          | 1.41            |

Locus Alleles Chr Location Neighborhood  
rs4415084 C|T 5p12 44698272

| SUBSET   | Rank | MAF         | Geno Counts                   | Subjects   | score X2 | score p-value | df | hom OR | hom OR 95% ( | hom OR 95% CI_u |
|----------|------|-------------|-------------------------------|------------|----------|---------------|----|--------|--------------|-----------------|
| STAGE1-3 | 7    | 0.407 0.429 | 3779 5060 1804 3184 4660 1808 | 10643 9652 | 10.98    | 0.0009192     | 1  | 1.13   | 1.05         | 1.21            |
| NHS      | 18   | 0.392 0.435 | 429 513 186 350 583 203       | 1128 1136  | 0.76     | 0.3839955     | 1  | 1.10   | 0.89         | 1.37            |
| STAGE1-2 | 15   | 0.404 0.426 | 1986 2660 914 1884 2752 1046  | 5560 5682  | 7.58     | 0.0059101     | 1  | 1.15   | 1.04         | 1.26            |
| STAGE2   | 14   | 0.406 0.424 | 1557 2147 728 1534 2169 843   | 4432 4546  | 6.97     | 0.0082798     | 1  | 1.16   | 1.04         | 1.29            |
| CPSII    | 11   | 0.427 0.399 | 178 265 99 193 257 85         | 542 535    | 1.07     | 0.2999003     | 1  | 0.85   | 0.61         | 1.16            |
| PBCS1    | 5    | 0.410 0.460 | 174 249 83 193 337 139        | 506 669    | 3.60     | 0.0578813     | 1  | 1.34   | 0.99         | 1.81            |
| PLCO     | 10   | 0.408 0.422 | 339 475 160 321 454 173       | 974 948    | 1.11     | 0.2913874     | 1  | 1.14   | 0.90         | 1.44            |
| WHI      | 9    | 0.400 0.420 | 866 1158 386 827 1121 446     | 2410 2394  | 5.73     | 0.0166977     | 1  | 1.20   | 1.03         | 1.39            |
| STAGE3   | 3    | 0.411 0.433 | 1793 2403 891 1302 1913 765   | 5087 3980  | 4.35     | 0.0369493     | 1  | 1.12   | 1.01         | 1.25            |
| NHS2     | 5    | 0.399 0.434 | 436 540 199 188 281 111       | 1175 580   | 1.29     | 0.2552468     | 1  | 1.16   | 0.90         | 1.50            |
| NOR      | 5    | 0.438 0.413 | 156 242 95 177 248 88         | 493 513    | 0.76     | 0.3845116     | 1  | 0.87   | 0.63         | 1.20            |
| PBCS2    | 21   | 0.424 0.435 | 593 833 328 457 711 271       | 1754 1439  | 0.01     | 0.9240296     | 1  | 1.01   | 0.84         | 1.21            |
| USRT     | 2    | 0.388 0.445 | 374 467 151 252 358 166       | 992 776    | 11.26    | 0.0007902     | 1  | 1.52   | 1.19         | 1.93            |
| WHS      | 14   | 0.414 0.426 | 234 321 118 228 315 129       | 673 672    | 0.62     | 0.4309422     | 1  | 1.12   | 0.85         | 1.47            |
| PBCS 1+2 | 7    | 0.421 0.443 | 767 1079 410 648 1043 407     | 2256 2098  | 1.07     | 0.3006457     | 1  | 1.08   | 0.93         | 1.26            |

Locus Alleles Chr Location Neighborhood  
rs17570439 T|C 1p34.2 40096797 TRIT1

| SUBSET   | Rank | MAF         | Geno Counts                 | Subjects   | score X2 | score p-value | df | hom OR | hom OR 95% ( | hom OR 95% CI_u |
|----------|------|-------------|-----------------------------|------------|----------|---------------|----|--------|--------------|-----------------|
| STAGE1-3 | 8    | 0.209 0.226 | 6650 3528 455 5797 3380 500 | 10633 9677 | 8.91     | 0.0028354     | 1  | 1.22   | 1.07         | 1.39            |
| NHS      | 7    | 0.204 0.244 | 719 381 42 654 424 67       | 1142 1145  | 5.95     | 0.0146986     | 1  | 1.63   | 1.10         | 2.42            |
| STAGE1-2 | 8    | 0.207 0.230 | 3473 1895 208 3380 2006 303 | 5576 5689  | 16.56    | 4.71E-05      | 1  | 1.45   | 1.21         | 1.74            |
| STAGE2   | 10   | 0.208 0.226 | 2754 1514 166 2726 1582 236 | 4434 4544  | 11.03    | 0.0008967     | 1  | 1.41   | 1.15         | 1.73            |
| CPSII    | 3    | 0.196 0.218 | 343 187 13 329 179 27       | 543 535    | 5.31     | 0.0212374     | 1  | 2.17   | 1.11         | 4.25            |
| PBCS1    | 9    | 0.210 0.222 | 310 179 17 406 228 34       | 506 668    | 2.07     | 0.1498294     | 1  | 1.54   | 0.85         | 2.79            |
| PLCO     | 20   | 0.220 0.235 | 599 323 53 552 346 50       | 975 948    | 0.02     | 0.8749368     | 1  | 0.97   | 0.65         | 1.44            |
| WHI      | 6    | 0.206 0.225 | 1502 825 83 1439 829 125    | 2410 2393  | 9.18     | 0.002449      | 1  | 1.55   | 1.16         | 2.05            |
| STAGE3   | 23   | 0.210 0.222 | 3177 1634 247 2416 1374 197 | 5058 3987  | 0.02     | 0.8996409     | 1  | 1.01   | 0.84         | 1.23            |
| NHS2     | 21   | 0.206 0.227 | 730 346 61 342 202 29       | 1137 573   | 0.07     | 0.7905007     | 1  | 0.94   | 0.60         | 1.48            |
| NOR      | 14   | 0.210 0.233 | 310 164 22 301 185 27       | 496 513    | 0.37     | 0.5408926     | 1  | 1.20   | 0.67         | 2.13            |
| PBCS2    | 20   | 0.208 0.216 | 1111 557 86 891 478 72      | 1754 1441  | 0.01     | 0.9035072     | 1  | 1.02   | 0.74         | 1.41            |
| USRT     | 9    | 0.218 0.221 | 607 344 45 476 258 43       | 996 777    | 0.96     | 0.3283836     | 1  | 1.24   | 0.81         | 1.90            |
| WHS      | 10   | 0.214 0.222 | 419 223 33 406 251 26       | 675 683    | 0.96     | 0.328039      | 1  | 0.77   | 0.46         | 1.30            |
| PBCS 1+2 | 13   | 0.208 0.218 | 1421 735 103 1298 706 106   | 2259 2110  | 0.52     | 0.4725421     | 1  | 1.11   | 0.84         | 1.46            |

Locus Alleles Chr Location Neighborhood  
rs9491859 C|A 6q22.33 128106056 C6orf190

| SUBSET   | Rank | MAF         | Geno Counts                   | Subjects   | score X2 | score p-value | df | hom OR | hom OR 95% ( | hom OR 95% CI_u |
|----------|------|-------------|-------------------------------|------------|----------|---------------|----|--------|--------------|-----------------|
| STAGE1-3 | 9    | 0.355 0.369 | 4448 4846 1351 3883 4411 1360 | 10645 9654 | 8.53     | 0.0035003     | 1  | 1.13   | 1.04         | 1.22            |
| NHS      | 2    | 0.356 0.381 | 459 552 130 447 523 175       | 1141 1145  | 7.48     | 0.0062356     | 1  | 1.40   | 1.10         | 1.79            |
| STAGE1-2 | 3    | 0.348 0.374 | 2351 2569 655 2284 2560 846   | 5575 5690  | 23.72    | 1.11E-06      | 1  | 1.31   | 1.18         | 1.46            |
| STAGE2   | 5    | 0.346 0.372 | 1892 2017 525 1837 2037 671   | 4434 4545  | 16.61    | 4.59E-05      | 1  | 1.29   | 1.14         | 1.46            |
| CPSII    | 14   | 0.350 0.339 | 220 266 57 238 231 66         | 543 535    | 0.90     | 0.3422902     | 1  | 1.20   | 0.82         | 1.75            |
| PBCS1    | 10   | 0.345 0.356 | 216 231 59 287 287 94         | 506 668    | 1.48     | 0.2241529     | 1  | 1.24   | 0.88         | 1.76            |
| PLCO     | 4    | 0.333 0.374 | 437 427 111 378 430 140       | 975 948    | 4.85     | 0.0276773     | 1  | 1.35   | 1.03         | 1.76            |
| WHI      | 5    | 0.350 0.382 | 1019 1093 298 934 1089 371    | 2410 2394  | 9.83     | 0.0017187     | 1  | 1.30   | 1.10         | 1.53            |
| STAGE3   | 7    | 0.362 0.363 | 2098 2281 696 1600 1852 514   | 5075 3966  | 1.09     | 0.2959918     | 1  | 0.94   | 0.83         | 1.06            |
| NHS2     | 23   | 0.367 0.365 | 482 523 170 238 257 82        | 1175 577   | 0.02     | 0.8856049     | 1  | 0.98   | 0.74         | 1.30            |
| NOR      | 11   | 0.372 0.371 | 200 212 75 200 232 70         | 487 502    | 0.42     | 0.5174658     | 1  | 0.89   | 0.63         | 1.27            |
| PBCS2    | 12   | 0.349 0.349 | 744 779 218 599 660 169       | 1741 1428  | 0.35     | 0.556853      | 1  | 0.94   | 0.76         | 1.16            |
| USRT     | 14   | 0.374 0.366 | 391 459 141 311 366 102       | 991 779    | 0.47     | 0.491228      | 1  | 0.91   | 0.69         | 1.19            |
| WHS      | 21   | 0.361 0.382 | 281 308 92 252 337 91         | 681 680    | 0.00     | 0.9451703     | 1  | 0.99   | 0.72         | 1.35            |
| PBCS 1+2 | 22   | 0.348 0.351 | 959 1006 277 885 946 263      | 2242 2094  | 0.04     | 0.8383971     | 1  | 1.02   | 0.85         | 1.22            |

| Locus      | Alleles | Chr         | Location                      | Neighborhood |          |               |    |        |                 |                 |  |
|------------|---------|-------------|-------------------------------|--------------|----------|---------------|----|--------|-----------------|-----------------|--|
| rs1274466  | T C     | 10p11.21    |                               | 34510210     | PAR3     |               |    |        |                 |                 |  |
| SUBSET     | Rank    | MAF         | Geno Counts                   | Subjects     | score X2 | score p-value | df | hom OR | hom OR 95% CI_l | hom OR 95% CI_u |  |
| STAGE1-3   | 10      | 0.449 0.432 | 3262 5237 2175 3133 4725 1825 | 10674 9683   | 7.52     | 0.0061035     | 1  | 0.91   | 0.85            | 0.97            |  |
| NHS        | 13      | 0.470 0.439 | 312 586 244 357 569 218       | 1142 1144    | 1.89     | 0.1690577     | 1  | 0.87   | 0.71            | 1.06            |  |
| STAGE1-2   | 12      | 0.456 0.430 | 1656 2757 1163 1852 2785 1053 | 5576 5690    | 9.85     | 0.0016964     | 1  | 0.86   | 0.79            | 0.95            |  |
| STAGE2     | 13      | 0.452 0.427 | 1344 2171 919 1495 2216 835   | 4434 4546    | 7.94     | 0.004826      | 1  | 0.86   | 0.78            | 0.96            |  |
| CPSII      | 9       | 0.471 0.436 | 152 271 120 172 259 104       | 543 535      | 1.16     | 0.2817783     | 1  | 0.85   | 0.63            | 1.14            |  |
| PBCS1      | 3       | 0.483 0.446 | 138 247 121 200 340 128       | 506 668      | 3.89     | 0.0485896     | 1  | 0.75   | 0.57            | 1.00            |  |
| PLCO       | 6       | 0.449 0.419 | 298 478 199 319 464 165       | 975 948      | 2.83     | 0.0925923     | 1  | 0.82   | 0.65            | 1.03            |  |
| WHI        | 19      | 0.443 0.424 | 756 1175 479 804 1153 438     | 2410 2395    | 1.96     | 0.1614906     | 1  | 0.90   | 0.78            | 1.04            |  |
| STAGE3     | 15      | 0.442 0.436 | 1606 2484 1013 1282 1942 774  | 5103 3998    | 0.34     | 0.5580876     | 1  | 0.97   | 0.87            | 1.08            |  |
| NHS2       | 14      | 0.441 0.435 | 379 559 240 186 286 110       | 1178 582     | 0.53     | 0.4663379     | 1  | 0.91   | 0.71            | 1.17            |  |
| NOR        | 16      | 0.391 0.401 | 184 235 76 188 240 86         | 495 514      | 0.36     | 0.5511497     | 1  | 1.11   | 0.79            | 1.55            |  |
| PBCS2      | 9       | 0.457 0.441 | 518 863 368 456 695 287       | 1749 1438    | 0.57     | 0.4517903     | 1  | 0.94   | 0.79            | 1.11            |  |
| USRT       | 17      | 0.454 0.444 | 295 489 205 243 378 156       | 989 777      | 0.11     | 0.7363964     | 1  | 0.96   | 0.76            | 1.21            |  |
| WHS        | 13      | 0.423 0.446 | 230 338 124 209 343 135       | 692 687      | 0.68     | 0.4104031     | 1  | 1.12   | 0.85            | 1.47            |  |
| PBCS 1+2   | 2       | 0.463 0.442 | 656 1106 488 655 1033 413     | 2250 2101    | 2.73     | 0.0984172     | 1  | 0.88   | 0.76            | 1.02            |  |
| Locus      | Alleles | Chr         | Location                      | Neighborhood |          |               |    |        |                 |                 |  |
| rs2067980  | A G     | 5p12        |                               | 45018074     |          |               |    |        |                 |                 |  |
| SUBSET     | Rank    | MAF         | Geno Counts                   | Subjects     | score X2 | score p-value | df | hom OR | hom OR 95% CI_l | hom OR 95% CI_u |  |
| STAGE1-3   | 11      | 0.159 0.173 | 7544 2828 285 6652 2704 318   | 10657 9674   | 6.62     | 0.0100954     | 1  | 1.24   | 1.05            | 1.45            |  |
| NHS        | 9       | 0.151 0.178 | 814 311 17 769 342 33         | 1142 1144    | 5.21     | 0.0225102     | 1  | 1.97   | 1.09            | 3.55            |  |
| STAGE1-2   | 7       | 0.151 0.174 | 4007 1455 114 3905 1597 189   | 5576 5691    | 17.54    | 2.82E-05      | 1  | 1.65   | 1.30            | 2.08            |  |
| STAGE2     | 7       | 0.151 0.172 | 3193 1144 97 3136 1255 156    | 4434 4547    | 12.67    | 0.0003709     | 1  | 1.59   | 1.23            | 2.05            |  |
| CPSII      | 13      | 0.159 0.164 | 383 147 13 377 140 18         | 543 535      | 0.91     | 0.3405005     | 1  | 1.42   | 0.69            | 2.93            |  |
| PBCS1      | 17      | 0.191 0.227 | 335 149 22 400 234 35         | 506 669      | 0.49     | 0.4849978     | 1  | 1.21   | 0.70            | 2.10            |  |
| PLCO       | 12      | 0.144 0.166 | 714 241 20 658 265 25         | 975 948      | 0.72     | 0.3955333     | 1  | 1.29   | 0.71            | 2.34            |  |
| WHI        | 3       | 0.143 0.161 | 1761 607 42 1701 616 78       | 2410 2395    | 11.31    | 0.0007715     | 1  | 1.90   | 1.30            | 2.77            |  |
| STAGE3     | 18      | 0.169 0.172 | 3537 1374 171 2747 1110 129   | 5082 3986    | 0.12     | 0.7341978     | 1  | 0.96   | 0.76            | 1.21            |  |
| NHS2       | 11      | 0.170 0.156 | 810 306 44 411 145 17         | 1160 573     | 0.77     | 0.3798933     | 1  | 0.78   | 0.44            | 1.37            |  |
| NOR        | 15      | 0.142 0.135 | 364 125 8 382 127 6           | 497 515      | 0.37     | 0.5449327     | 1  | 0.72   | 0.25            | 2.09            |  |
| PBCS2      | 16      | 0.190 0.192 | 1158 519 73 941 441 55        | 1750 1437    | 0.24     | 0.6225991     | 1  | 0.91   | 0.64            | 1.31            |  |
| USRT       | 7       | 0.155 0.177 | 713 256 26 530 216 29         | 995 775      | 1.84     | 0.1744837     | 1  | 1.45   | 0.85            | 2.48            |  |
| WHS        | 18      | 0.153 0.164 | 492 168 20 483 181 22         | 680 686      | 0.08     | 0.7759873     | 1  | 1.09   | 0.59            | 2.02            |  |
| PBCS 1+2   | 24      | 0.190 0.203 | 1493 667 95 1341 672 90       | 2255 2103    | 0.01     | 0.9130455     | 1  | 1.02   | 0.76            | 1.36            |  |
| Locus      | Alleles | Chr         | Location                      | Neighborhood |          |               |    |        |                 |                 |  |
| rs10850145 | C T     | 12q24.13    |                               | 112428512    |          |               |    |        |                 |                 |  |
| SUBSET     | Rank    | MAF         | Geno Counts                   | Subjects     | score X2 | score p-value | df | hom OR | hom OR 95% CI_l | hom OR 95% CI_u |  |
| STAGE1-3   | 12      | 0.095 0.106 | 8763 1844 91 7754 1837 115    | 10698 9706   | 5.69     | 0.0170869     | 1  | 1.40   | 1.06            | 1.84            |  |
| NHS        | 5       | 0.086 0.110 | 951 186 5 912 215 18          | 1142 1145    | 7.39     | 0.0065658     | 1  | 3.63   | 1.34            | 9.82            |  |
| STAGE1-2   | 19      | 0.090 0.108 | 4627 897 52 4535 1085 70      | 5576 5690    | 2.33     | 0.1269501     | 1  | 1.32   | 0.92            | 1.90            |  |
| STAGE2     | 22      | 0.091 0.107 | 3676 711 47 3623 870 52       | 4434 4545    | 0.15     | 0.7027168     | 1  | 1.08   | 0.73            | 1.61            |  |
| CPSII      | 16      | 0.099 0.107 | 444 90 9 426 103 6            | 543 535      | 0.56     | 0.4525809     | 1  | 0.67   | 0.24            | 1.90            |  |
| PBCS1      | 15      | 0.094 0.113 | 417 83 6 523 141 5            | 506 669      | 0.60     | 0.4397202     | 1  | 0.63   | 0.19            | 2.07            |  |
| PLCO       | 15      | 0.077 0.094 | 832 135 8 775 167 6           | 975 948      | 0.23     | 0.6285283     | 1  | 0.77   | 0.27            | 2.23            |  |
| WHI        | 18      | 0.094 0.111 | 1983 403 24 1899 459 35       | 2410 2393    | 2.16     | 0.1420172     | 1  | 1.48   | 0.88            | 2.49            |  |
| STAGE3     | 4       | 0.100 0.105 | 4136 948 39 3221 752 45       | 5123 4018    | 3.18     | 0.0744547     | 1  | 1.48   | 0.96            | 2.27            |  |
| NHS2       | 1       | 0.103 0.108 | 947 218 12 474 96 15          | 1177 585     | 6.18     | 0.0129309     | 1  | 2.55   | 1.19            | 5.49            |  |
| NOR        | 23      | 0.081 0.090 | 414 80 0 426 82 5             | 494 513      |          |               |    |        |                 |                 |  |
| PBCS2      | 10      | 0.104 0.108 | 1412 338 15 1152 282 16       | 1765 1450    | 0.54     | 0.4640653     | 1  | 1.30   | 0.64            | 2.64            |  |

|          |    |             |                         |           |      |           |   |      |      |      |
|----------|----|-------------|-------------------------|-----------|------|-----------|---|------|------|------|
| USRT     | 23 | 0.105 0.106 | 799 184 12 622 146 9    | 995 777   | 0.01 | 0.9265977 | 1 | 0.96 | 0.40 | 2.29 |
| WHS      | 24 | 0.092 0.105 | 564 128 0 547 146 0     | 692 693   | -    | 1         | 1 | 1.00 | 1.00 | 1.00 |
| PBCS 1+2 | 21 | 0.102 0.110 | 1829 420 21 1673 423 21 | 2270 2117 | 0.05 | 0.8202303 | 1 | 1.07 | 0.58 | 1.97 |

| Locus     | Alleles | Chr         | Location                      | Neighborhood |          |               |    |        |                 |                 |
|-----------|---------|-------------|-------------------------------|--------------|----------|---------------|----|--------|-----------------|-----------------|
| rs3817198 | T C     | 11p15.5     |                               | 1865582 LSP1 |          |               |    |        |                 |                 |
| SUBSET    | Rank    | MAF         | Geno Counts                   | Subjects     | score X2 | score p-value | df | hom OR | hom OR 95% CI_l | hom OR 95% CI_u |
| STAGE1-3  | 13      | 0.323 0.333 | 4881 4670 1113 4350 4237 1105 | 10664 9692   | 4.86     | 0.0274601     | 1  | 1.10   | 1.01            | 1.21            |
| NHS       | 15      | 0.318 0.330 | 524 510 108 514 505 125       | 1142 1144    | 1.35     | 0.2455947     | 1  | 1.17   | 0.90            | 1.54            |
| STAGE1-2  | 18      | 0.326 0.341 | 2533 2438 597 2485 2518 677   | 5568 5680    | 4.01     | 0.0451938     | 1  | 1.13   | 1.00            | 1.27            |
| STAGE2    | 16      | 0.328 0.344 | 2009 1928 489 1971 2013 552   | 4426 4536    | 2.74     | 0.0977529     | 1  | 1.12   | 0.98            | 1.27            |
| CPSII     | 20      | 0.334 0.345 | 243 231 64 235 227 70         | 538 532      | 0.39     | 0.5328939     | 1  | 1.12   | 0.78            | 1.61            |
| PBCS1     | 14      | 0.319 0.333 | 229 228 47 292 299 71         | 504 662      | 0.62     | 0.4324211     | 1  | 1.17   | 0.79            | 1.72            |
| PLCO      | 11      | 0.335 0.344 | 440 417 118 397 449 101       | 975 947      | 0.98     | 0.3214627     | 1  | 0.87   | 0.65            | 1.15            |
| WHI       | 12      | 0.326 0.346 | 1097 1052 260 1047 1038 310   | 2409 2395    | 5.31     | 0.0211715     | 1  | 1.23   | 1.03            | 1.46            |
| STAGE3    | 10      | 0.320 0.322 | 2347 2233 516 1859 1722 429   | 5096 4010    | 0.79     | 0.3737143     | 1  | 1.06   | 0.93            | 1.22            |
| NHS2      | 18      | 0.320 0.314 | 538 516 117 285 246 64        | 1171 595     | 0.25     | 0.6164422     | 1  | 1.09   | 0.79            | 1.50            |
| NOR       | 4       | 0.262 0.290 | 269 194 33 258 215 42         | 496 515      | 0.83     | 0.3622556     | 1  | 1.25   | 0.78            | 2.00            |
| PBCS2     | 5       | 0.330 0.339 | 789 789 189 634 637 171       | 1767 1442    | 1.08     | 0.2993151     | 1  | 1.12   | 0.90            | 1.40            |
| USRT      | 8       | 0.338 0.317 | 442 434 119 366 331 81        | 995 778      | 1.05     | 0.3064097     | 1  | 0.86   | 0.63            | 1.15            |
| WHS       | 8       | 0.312 0.320 | 309 300 58 316 293 71         | 667 680      | 1.18     | 0.2763964     | 1  | 1.22   | 0.85            | 1.76            |
| PBCS 1+2  | 5       | 0.328 0.336 | 1019 1016 236 932 933 241     | 2271 2106    | 1.24     | 0.2646205     | 1  | 1.11   | 0.92            | 1.35            |

| Locus     | Alleles | Chr         | Location                    | Neighborhood         |          |               |    |        |                 |                 |
|-----------|---------|-------------|-----------------------------|----------------------|----------|---------------|----|--------|-----------------|-----------------|
| rs3134615 | G T     | 1p34.2      |                             | 40134653 TRIT1,MYCL1 |          |               |    |        |                 |                 |
| SUBSET    | Rank    | MAF         | Geno Counts                 | Subjects             | score X2 | score p-value | df | hom OR | hom OR 95% CI_l | hom OR 95% CI_u |
| STAGE1-3  | 14      | 0.228 0.246 | 6374 3763 552 5488 3630 568 | 10689 9686           | 4.79     | 0.0285867     | 1  | 1.14   | 1.01            | 1.29            |
| NHS       | 10      | 0.220 0.263 | 690 402 50 617 454 74       | 1142 1145            | 4.85     | 0.0277245     | 1  | 1.51   | 1.04            | 2.18            |
| STAGE1-2  | 14      | 0.227 0.250 | 3315 1996 265 3183 2170 339 | 5576 5692            | 8.04     | 0.0045798     | 1  | 1.27   | 1.08            | 1.50            |
| STAGE2    | 15      | 0.228 0.247 | 2625 1594 215 2566 1716 265 | 4434 4547            | 4.25     | 0.0391554     | 1  | 1.21   | 1.01            | 1.46            |
| CPSII     | 4       | 0.215 0.236 | 326 200 17 313 192 30       | 543 535              | 3.96     | 0.0464739     | 1  | 1.84   | 1.00            | 3.37            |
| PBCS1     | 13      | 0.226 0.238 | 299 185 22 387 245 37       | 506 669              | 0.85     | 0.3579284     | 1  | 1.29   | 0.75            | 2.21            |
| PLCO      | 17      | 0.236 0.258 | 578 334 63 516 375 57       | 975 948              | 0.17     | 0.6841156     | 1  | 0.93   | 0.64            | 1.34            |
| WHI       | 16      | 0.228 0.248 | 1422 875 113 1350 904 141   | 2410 2395            | 3.45     | 0.063401      | 1  | 1.27   | 0.99            | 1.64            |
| STAGE3    | 19      | 0.229 0.240 | 3059 1767 287 2305 1463 230 | 5113 3998            | 0.08     | 0.7748106     | 1  | 1.03   | 0.86            | 1.23            |
| NHS2      | 16      | 0.225 0.235 | 724 388 73 341 209 32       | 1185 582             | 0.31     | 0.5800905     | 1  | 0.89   | 0.58            | 1.36            |
| NOR       | 18      | 0.232 0.253 | 292 179 26 284 200 30       | 497 514              | 0.18     | 0.6740752     | 1  | 1.12   | 0.65            | 1.93            |
| PBCS2     | 18      | 0.226 0.231 | 1063 591 102 854 504 81     | 1756 1439            | 0.05     | 0.8277884     | 1  | 0.97   | 0.72            | 1.31            |
| USRT      | 6       | 0.240 0.246 | 567 373 51 445 276 52       | 991 773              | 1.97     | 0.1600682     | 1  | 1.33   | 0.89            | 1.98            |
| WHS       | 22      | 0.224 0.249 | 413 236 35 381 274 35       | 684 690              | 0.00     | 0.9700835     | 1  | 0.99   | 0.61            | 1.60            |
| PBCS 1+2  | 23      | 0.226 0.233 | 1362 776 124 1241 746 117   | 2262 2104            | 0.01     | 0.909112      | 1  | 1.02   | 0.78            | 1.32            |

| Locus      | Alleles | Chr         | Location                    | Neighborhood |          |               |    |        |                 |                 |
|------------|---------|-------------|-----------------------------|--------------|----------|---------------|----|--------|-----------------|-----------------|
| rs12608723 | A G     | 19q13.11    |                             | 38508973     |          |               |    |        |                 |                 |
| SUBSET     | Rank    | MAF         | Geno Counts                 | Subjects     | score X2 | score p-value | df | hom OR | hom OR 95% CI_l | hom OR 95% CI_u |
| STAGE1-3   | 15      | 0.136 0.128 | 7995 2464 224 7377 2145 166 | 10683 9688   | 3.98     | 0.0461642     | 1  | 0.81   | 0.66            | 1.00            |
| NHS        | 11      | 0.153 0.123 | 819 296 27 877 252 15       | 1142 1144    | 3.51     | 0.0608462     | 1  | 0.55   | 0.29            | 1.04            |
| STAGE1-2   | 17      | 0.143 0.126 | 4103 1351 122 4355 1242 94  | 5576 5691    | 4.31     | 0.0379622     | 1  | 0.75   | 0.57            | 0.99            |
| STAGE2     | 17      | 0.140 0.126 | 3284 1055 95 3478 990 79    | 4434 4547    | 1.94     | 0.1637433     | 1  | 0.81   | 0.60            | 1.09            |
| CPSII      | 15      | 0.140 0.120 | 398 138 7 417 108 10        | 543 535      | 0.58     | 0.4447027     | 1  | 1.46   | 0.55            | 3.86            |
| PBCS1      | 16      | 0.153 0.129 | 364 129 13 510 146 13       | 506 669      | 0.52     | 0.4701128     | 1  | 0.75   | 0.35            | 1.64            |
| PLCO       | 21      | 0.132 0.124 | 738 216 21 732 196 20       | 975 948      | 0.00     | 0.9465858     | 1  | 0.98   | 0.53            | 1.82            |
| WHI        | 15      | 0.141 0.128 | 1784 572 54 1819 540 36     | 2410 2395    | 3.56     | 0.0593621     | 1  | 0.67   | 0.44            | 1.02            |
| STAGE3     | 13      | 0.129 0.132 | 3894 1116 102 3022 909 72   | 5112 4003    | 0.46     | 0.4959162     | 1  | 0.90   | 0.66            | 1.22            |

|          |    |             |                         |           |      |           |   |      |      |      |
|----------|----|-------------|-------------------------|-----------|------|-----------|---|------|------|------|
| NHS2     | 20 | 0.127 0.122 | 907 259 21 453 118 12   | 1187 583  | 0.18 | 0.6725248 | 1 | 1.17 | 0.57 | 2.39 |
| NOR      | 21 | 0.128 0.167 | 380 103 12 356 148 12   | 495 516   | 0.01 | 0.9179541 | 1 | 0.96 | 0.43 | 2.15 |
| PBCS2    | 6  | 0.124 0.118 | 1344 368 32 1120 300 20 | 1744 1440 | 0.98 | 0.3230629 | 1 | 0.75 | 0.43 | 1.32 |
| USRT     | 18 | 0.138 0.142 | 736 239 17 573 191 15   | 992 779   | 0.11 | 0.7397331 | 1 | 1.13 | 0.56 | 2.27 |
| WHS      | 6  | 0.135 0.130 | 527 147 20 520 152 13   | 694 685   | 1.43 | 0.2319044 | 1 | 0.65 | 0.32 | 1.32 |
| PBCS 1+2 | 6  | 0.130 0.120 | 1706 494 45 1630 440 33 | 2245 2103 | 1.17 | 0.2798722 | 1 | 0.78 | 0.50 | 1.23 |

Locus Alleles Chr Location Neighborhood  
rs4666451 G|A 2p24.1 19150424

| SUBSET   | Rank | MAF         | Geno Counts                   | Subjects  | score X2 | score p-value | df | hom OR | hom OR 95% CI_l | hom OR 95% CI_u |
|----------|------|-------------|-------------------------------|-----------|----------|---------------|----|--------|-----------------|-----------------|
| STAGE1-3 | 16   | 0.391 0.382 | 3546 4486 1479 3251 4055 1238 | 9511 8544 | 3.96     | 0.0465612     | 1  | 0.92   | 0.85            | 1.00            |
| STAGE1-2 | 13   | 0.397 0.377 | 1622 2102 710 1747 2172 628   | 4434 4547 | 8.58     | 0.0033985     | 1  | 0.84   | 0.75            | 0.94            |
| STAGE2   | 11   | 0.397 0.377 | 1622 2102 710 1747 2172 628   | 4434 4547 | 8.58     | 0.0033985     | 1  | 0.84   | 0.75            | 0.94            |
| CPSII    | 7    | 0.394 0.400 | 201 256 86 177 288 70         | 543 535   | 1.65     | 0.1988009     | 1  | 0.80   | 0.57            | 1.12            |
| PBCS1    | 11   | 0.409 0.380 | 176 246 84 257 316 96         | 506 669   | 1.13     | 0.288776      | 1  | 0.84   | 0.61            | 1.16            |
| PLCO     | 9    | 0.393 0.373 | 355 474 146 363 462 123       | 975 948   | 1.60     | 0.2062669     | 1  | 0.85   | 0.65            | 1.10            |
| WHI      | 13   | 0.397 0.372 | 890 1126 394 950 1106 339     | 2410 2395 | 4.47     | 0.0344341     | 1  | 0.84   | 0.72            | 0.99            |
| STAGE3   | 22   | 0.386 0.388 | 1926 2385 769 1504 1887 610   | 5080 4001 | 0.02     | 0.8863773     | 1  | 1.01   | 0.90            | 1.13            |
| NHS2     | 22   | 0.384 0.385 | 446 528 178 220 273 87        | 1152 580  | 0.06     | 0.8054664     | 1  | 0.97   | 0.73            | 1.28            |
| NOR      | 19   | 0.363 0.355 | 201 230 65 214 238 64         | 496 516   | 0.11     | 0.7379095     | 1  | 0.94   | 0.65            | 1.36            |
| PBCS2    | 2    | 0.399 0.411 | 621 858 268 504 692 247       | 1747 1443 | 1.84     | 0.174679      | 1  | 1.14   | 0.94            | 1.38            |
| USRT     | 11   | 0.382 0.370 | 389 452 154 309 358 108       | 995 775   | 0.82     | 0.3647961     | 1  | 0.88   | 0.68            | 1.15            |
| WHS      | 23   | 0.380 0.389 | 269 317 104 257 326 104       | 690 687   | 0.00     | 0.9727958     | 1  | 1.01   | 0.75            | 1.35            |
| PBCS 1+2 | 19   | 0.402 0.401 | 795 1103 352 761 1004 343     | 2250 2108 | 0.32     | 0.5721524     | 1  | 1.05   | 0.89            | 1.23            |

Locus Alleles Chr Location Neighborhood  
rs37936 A|G 7q21.11 79806994

| SUBSET   | Rank | MAF         | Geno Counts                   | Subjects   | score X2 | score p-value | df | hom OR | hom OR 95% CI_l | hom OR 95% CI_u |
|----------|------|-------------|-------------------------------|------------|----------|---------------|----|--------|-----------------|-----------------|
| STAGE1-3 | 17   | 0.384 0.372 | 4045 4861 1609 3800 4343 1365 | 10515 9508 | 3.53     | 0.0602546     | 1  | 0.93   | 0.86            | 1.00            |
| NHS      | 19   | 0.400 0.365 | 403 541 178 474 476 171       | 1122 1121  | 0.16     | 0.6901133     | 1  | 0.95   | 0.76            | 1.20            |
| STAGE1-2 | 11   | 0.399 0.369 | 1839 2287 833 1982 2203 705   | 4959 4890  | 10.59    | 0.0011378     | 1  | 0.83   | 0.75            | 0.93            |
| STAGE2   | 8    | 0.398 0.371 | 1436 1746 655 1508 1727 534   | 3837 3769  | 12.14    | 0.0004923     | 1  | 0.80   | 0.71            | 0.91            |
| CPSII    | 17   | 0.387 0.373 | 199 251 79 202 249 70         | 529 521    | 0.48     | 0.4867017     | 1  | 0.88   | 0.62            | 1.25            |
| PLCO     | 16   | 0.378 0.376 | 379 431 146 373 394 147       | 956 914    | 0.23     | 0.6295333     | 1  | 1.06   | 0.83            | 1.36            |
| WHI      | 1    | 0.409 0.368 | 858 1064 430 933 1084 317     | 2352 2334  | 19.32    | 1.11E-05      | 1  | 0.70   | 0.60            | 0.82            |
| STAGE3   | 16   | 0.372 0.377 | 2013 2359 714 1563 1857 577   | 5086 3997  | 0.29     | 0.5903997     | 1  | 1.03   | 0.92            | 1.16            |
| NHS2     | 3    | 0.371 0.396 | 475 529 171 222 272 99        | 1175 593   | 1.40     | 0.2372417     | 1  | 1.18   | 0.90            | 1.54            |
| NOR      | 8    | 0.364 0.345 | 202 227 67 221 233 61         | 496 515    | 0.63     | 0.4265439     | 1  | 0.86   | 0.59            | 1.25            |
| PBCS2    | 4    | 0.368 0.364 | 706 782 248 568 669 183       | 1736 1420  | 1.30     | 0.2550638     | 1  | 0.89   | 0.72            | 1.09            |
| USRT     | 5    | 0.393 0.403 | 356 496 143 283 364 132       | 995 779    | 2.21     | 0.1372782     | 1  | 1.22   | 0.94            | 1.57            |
| WHS      | 5    | 0.362 0.379 | 274 325 85 269 319 102        | 684 690    | 1.62     | 0.2029214     | 1  | 1.22   | 0.90            | 1.67            |
| PBCS 1+2 | 9    | 0.367 0.364 | 899 997 310 823 952 266       | 2206 2041  | 0.94     | 0.3321725     | 1  | 0.92   | 0.77            | 1.09            |

Locus Alleles Chr Location Neighborhood  
rs10941679 A|G 5p12 44742255

| SUBSET   | Rank | MAF         | Geno Counts                 | Subjects  | score X2 | score p-value | df | hom OR | hom OR 95% CI_l | hom OR 95% CI_u |
|----------|------|-------------|-----------------------------|-----------|----------|---------------|----|--------|-----------------|-----------------|
| STAGE1-3 | 18   | 0.259 0.279 | 3047 2125 374 2387 1867 353 | 5546 4607 | 3.19     | 0.0738758     | 1  | 1.15   | 0.99            | 1.33            |
| STAGE3   | 6    | 0.259 0.277 | 2791 1931 347 2070 1609 297 | 5069 3976 | 1.31     | 0.2518169     | 1  | 1.10   | 0.94            | 1.29            |
| NHS2     | 10   | 0.255 0.277 | 637 430 76 301 228 45       | 1143 574  | 0.83     | 0.3631958     | 1  | 1.19   | 0.81            | 1.75            |
| NOR      | 13   | 0.303 0.282 | 239 213 44 265 210 40       | 496 515   | 0.40     | 0.5249257     | 1  | 0.87   | 0.55            | 1.35            |
| PBCS2    | 17   | 0.259 0.276 | 969 667 121 737 605 94      | 1757 1436 | 0.15     | 0.7022729     | 1  | 0.95   | 0.72            | 1.25            |
| USRT     | 1    | 0.236 0.290 | 575 373 49 395 307 71       | 997 773   | 12.56    | 0.0003935     | 1  | 1.96   | 1.34            | 2.85            |
| WHS      | 9    | 0.268 0.260 | 371 248 57 372 259 47       | 676 678   | 1.07     | 0.3000917     | 1  | 0.81   | 0.54            | 1.21            |
| PBCS 1+2 | 11   | 0.259 0.281 | 1225 861 148 1054 863 150   | 2234 2067 | 0.67     | 0.4147939     | 1  | 1.10   | 0.87            | 1.40            |



| Locus      | Alleles | Chr         | Location                    | Neighborhood     |          |               |    |        |                 |                 |  |
|------------|---------|-------------|-----------------------------|------------------|----------|---------------|----|--------|-----------------|-----------------|--|
| rs17740709 | A G     | 12q21.31    |                             | 81947471 TMTC2   |          |               |    |        |                 |                 |  |
| SUBSET     | Rank    | MAF         | Geno Counts                 | Subjects         | score X2 | score p-value | df | hom OR | hom OR 95% CI_l | hom OR 95% CI_u |  |
| STAGE1-3   | 19      | 0.220 0.214 | 6450 3688 498/6023 3139 502 | 10636 9664       | 2.84     | 0.0920764     | 1  | 1.12   | 0.98            | 1.27            |  |
| NHS        | 12      | 0.218 0.212 | 692 402 48/725 355 65       | 1142 1145        | 2.64     | 0.103958      | 1  | 1.37   | 0.94            | 2.01            |  |
| STAGE1-2   | 10      | 0.218 0.214 | 3372 1979 225/3566 1821 305 | 5576 5692        | 11.00    | 0.0009096     | 1  | 1.35   | 1.13            | 1.61            |  |
| STAGE2     | 12      | 0.218 0.214 | 2680 1577 177/2841 1466 240 | 4434 4547        | 8.39     | 0.003774      | 1  | 1.34   | 1.10            | 1.63            |  |
| CPSII      | 18      | 0.215 0.200 | 328 197 18/343 170 22       | 543 535          | 0.48     | 0.4887008     | 1  | 1.25   | 0.66            | 2.36            |  |
| PBCS1      | 4       | 0.242 0.247 | 282 203 21/383 241 45       | 506 669          | 3.61     | 0.0575448     | 1  | 1.67   | 0.98            | 2.83            |  |
| PLCO       | 19      | 0.214 0.203 | 603 326 46/610 291 47       | 975 948          | 0.06     | 0.8063622     | 1  | 1.05   | 0.69            | 1.60            |  |
| WHI        | 8       | 0.215 0.212 | 1467 851 92/1505 764 126    | 2410 2395        | 5.78     | 0.0162149     | 1  | 1.40   | 1.06            | 1.84            |  |
| STAGE3     | 8       | 0.223 0.216 | 3078 1710 273/2458 1320 197 | 5061 3975        | 0.87     | 0.3517699     | 1  | 0.91   | 0.76            | 1.10            |  |
| NHS2       | 8       | 0.211 0.207 | 723 368 59/356 190 23       | 1150 569         | 0.99     | 0.3191574     | 1  | 0.78   | 0.48            | 1.27            |  |
| NOR        | 17      | 0.243 0.205 | 281 187 27/328 161 25       | 495 514          | 0.18     | 0.6713544     | 1  | 0.89   | 0.51            | 1.55            |  |
| PBCS2      | 23      | 0.234 0.240 | 1042 597 112/836 508 91     | 1751 1435        | 0.00     | 0.9496852     | 1  | 0.99   | 0.74            | 1.32            |  |
| USRT       | 13      | 0.212 0.195 | 612 339 41/501 250 27       | 992 778          | 0.52     | 0.4715914     | 1  | 0.83   | 0.51            | 1.37            |  |
| WHS        | 17      | 0.213 0.201 | 420 219 34/437 211 31       | 673 679          | 0.17     | 0.6759027     | 1  | 0.90   | 0.55            | 1.48            |  |
| PBCS 1+2   | 12      | 0.236 0.243 | 1324 799 133/1218 747 136   | 2256 2101        | 0.63     | 0.4285356     | 1  | 1.10   | 0.86            | 1.41            |  |
| Locus      | Alleles | Chr         | Location                    | Neighborhood     |          |               |    |        |                 |                 |  |
| rs724244   | C T     | 3p24.1      |                             | 27217157 NEK10   |          |               |    |        |                 |                 |  |
| SUBSET     | Rank    | MAF         | Geno Counts                 | Subjects         | score X2 | score p-value | df | hom OR | hom OR 95% CI_l | hom OR 95% CI_u |  |
| STAGE1-3   | 20      | 0.261 0.275 | 5213 3644 662/4497 3397 649 | 9519 8543        | 2.76     | 0.0966637     | 1  | 1.10   | 0.98            | 1.23            |  |
| STAGE1-2   | 9       | 0.252 0.281 | 2473 1688 272/2354 1826 363 | 4433 4543        | 11.74    | 0.0006124     | 1  | 1.33   | 1.13            | 1.56            |  |
| STAGE2     | 9       | 0.252 0.281 | 2473 1688 272/2354 1826 363 | 4433 4543        | 11.74    | 0.0006124     | 1  | 1.33   | 1.13            | 1.56            |  |
| CPSII      | 8       | 0.247 0.273 | 309 198 35/287 202 45       | 542 534          | 1.52     | 0.2182402     | 1  | 1.33   | 0.84            | 2.11            |  |
| PBCS1      | 18      | 0.246 0.265 | 293 177 36/368 245 54       | 506 667          | 0.39     | 0.5317012     | 1  | 1.15   | 0.74            | 1.78            |  |
| PLCO       | 1       | 0.230 0.291 | 569 364 42/481 381 85       | 975 947          | 16.96    | 3.81E-05      | 1  | 2.19   | 1.50            | 3.21            |  |
| WHI        | 20      | 0.263 0.283 | 1302 949 159/1218 998 179   | 2410 2395        | 1.41     | 0.2349149     | 1  | 1.14   | 0.92            | 1.43            |  |
| STAGE3     | 9       | 0.269 0.268 | 2740 1960 390/2144 1572 286 | 5090 4002        | 0.87     | 0.3521739     | 1  | 0.93   | 0.79            | 1.09            |  |
| NHS2       | 19      | 0.270 0.283 | 638 417 105/302 231 49      | 1160 582         | 0.19     | 0.6609461     | 1  | 0.92   | 0.65            | 1.32            |  |
| NOR        | 9       | 0.248 0.264 | 276 192 27/278 204 34       | 495 516          | 0.57     | 0.448816      | 1  | 1.22   | 0.73            | 2.06            |  |
| PBCS2      | 3       | 0.273 0.261 | 926 696 131/778 567 92      | 1753 1437        | 1.39     | 0.238022      | 1  | 0.85   | 0.64            | 1.12            |  |
| USRT       | 22      | 0.273 0.267 | 524 397 73/418 302 56       | 994 776          | 0.01     | 0.9184001     | 1  | 0.98   | 0.68            | 1.41            |  |
| WHS        | 20      | 0.266 0.274 | 376 258 54/368 268 55       | 688 691          | 0.01     | 0.9393068     | 1  | 1.02   | 0.69            | 1.50            |  |
| PBCS 1+2   | 17      | 0.267 0.262 | 1219 869 167/1145 811 146   | 2255 2102        | 0.35     | 0.5568183     | 1  | 0.93   | 0.74            | 1.18            |  |
| Locus      | Alleles | Chr         | Location                    | Neighborhood     |          |               |    |        |                 |                 |  |
| rs2303659  | G A     | 11q24.3     |                             | 129326474 PRDM10 |          |               |    |        |                 |                 |  |
| SUBSET     | Rank    | MAF         | Geno Counts                 | Subjects         | score X2 | score p-value | df | hom OR | hom OR 95% CI_l | hom OR 95% CI_u |  |
| STAGE1-3   | 21      | 0.035 0.028 | 9926 718 10/9156 508 14     | 10654 9678       | 1.11     | 0.2921125     | 1  | 1.54   | 0.68            | 3.47            |  |
| NHS        | 22      | 0.034 0.024 | 1064 78 0/1089 56 0         | 1142 1145        | -        |               | 1  | 1.00   | 1.00            | 1.00            |  |
| STAGE1-2   | 21      | 0.034 0.025 | 5198 376 2/5412 277 3       | 5576 5692        | 0.18     | 0.6713392     | 1  | 1.47   | 0.25            | 8.80            |  |
| STAGE2     | 21      | 0.034 0.025 | 4134 298 2/4323 221 3       | 4434 4547        | 0.18     | 0.6750488     | 1  | 1.46   | 0.24            | 8.76            |  |
| CPSII      | 24      | 0.030 0.017 | 510 33 0/518 16 1           | 543 535          |          |               |    |        |                 |                 |  |
| PBCS1      | 22      | 0.033 0.022 | 473 33 0/640 29 0           | 506 669          | -        |               | 1  | 1.00   | 1.00            | 1.00            |  |
| PLCO       | 22      | 0.036 0.028 | 906 68 1/895 52 1           | 975 948          | 0.00     | 0.9841482     | 1  | 1.03   | 0.06            | 16.47           |  |
| WHI        | 23      | 0.034 0.026 | 2245 164 1/2270 124 1       | 2410 2395        | 0.00     | 0.9964767     | 1  | 1.01   | 0.06            | 16.10           |  |
| STAGE3     | 5       | 0.035 0.032 | 4728 342 8/3745 231 11      | 5078 3987        | 1.50     | 0.2213234     | 1  | 1.75   | 0.70            | 4.36            |  |
| NHS2       | 15      | 0.040 0.025 | 1074 82 5/558 21 4          | 1161 583         | 0.49     | 0.4824677     | 1  | 1.60   | 0.43            | 5.97            |  |
| NOR        | 24      | 0.036 0.043 | 460 36 0/472 44 0           | 496 516          | -        |               | 1  | 1.00   | 1.00            | 1.00            |  |
| PBCS2      | 8       | 0.032 0.030 | 1648 112 1/1358 83 2        | 1761 1443        | 0.57     | 0.4512525     | 1  | 2.44   | 0.22            | 26.97           |  |
| USRT       | 24      | 0.037 0.035 | 920 74 0/723 54 0           | 994 777          | -        |               | 1  | 1.00   | 1.00            | 1.00            |  |

|          |    |             |                       |           |      |           |   |      |      |       |
|----------|----|-------------|-----------------------|-----------|------|-----------|---|------|------|-------|
| WHS      | 7  | 0.032 0.029 | 626 38 2 634 29 5     | 666 668   | 1.28 | 0.2572544 | 1 | 2.50 | 0.48 | 12.95 |
| PBCS 1+2 | 15 | 0.032 0.027 | 2121 145 1 1997 112 2 | 2267 2111 | 0.41 | 0.5223721 | 1 | 2.15 | 0.19 | 23.71 |

|            |         |         |          |                      |
|------------|---------|---------|----------|----------------------|
| Locus      | Alleles | Chr     | Location | Neighborhood         |
| rs11077820 | T C     | 17q25.1 |          | 71966263 UBE2O,AANAT |

| SUBSET   | Rank | MAF         | Geno Counts                   | Subjects   | score X2 | score p-value | df | hom OR | hom OR 95% CI | hom OR 95% CI_u |
|----------|------|-------------|-------------------------------|------------|----------|---------------|----|--------|---------------|-----------------|
| STAGE1-3 | 22   | 0.370 0.365 | 4214 4964 1454 3948 4367 1348 | 10632 9663 | 0.32     | 0.5713974     | 1  | 1.02   | 0.94          | 1.11            |
| NHS      | 16   | 0.382 0.370 | 429 553 160 475 492 178       | 1142 1145  | 1.07     | 0.3009251     | 1  | 1.13   | 0.90          | 1.42            |
| STAGE1-2 | 20   | 0.380 0.368 | 2081 2738 750 2321 2552 815   | 5569 5688  | 1.74     | 0.1867883     | 1  | 1.07   | 0.97          | 1.20            |
| STAGE2   | 19   | 0.380 0.367 | 1652 2185 590 1846 2060 637   | 4427 4543  | 0.92     | 0.3387264     | 1  | 1.06   | 0.94          | 1.20            |
| CPSII    | 10   | 0.377 0.374 | 216 242 83 205 260 70         | 541 535    | 1.12     | 0.2890072     | 1  | 0.83   | 0.59          | 1.17            |
| PBCS1    | 21   | 0.375 0.353 | 193 244 67 284 298 87         | 504 669    | 0.02     | 0.8845764     | 1  | 0.98   | 0.69          | 1.37            |
| PLCO     | 18   | 0.371 0.355 | 371 484 120 395 430 121       | 975 946    | 0.10     | 0.7493309     | 1  | 1.05   | 0.80          | 1.37            |
| WHI      | 17   | 0.385 0.374 | 872 1215 320 962 1072 359     | 2407 2393  | 2.88     | 0.089637      | 1  | 1.15   | 0.98          | 1.35            |
| STAGE3   | 11   | 0.359 0.362 | 2133 2225 705 1628 1817 533   | 5063 3978  | 0.52     | 0.4703102     | 1  | 0.96   | 0.85          | 1.08            |
| NHS2     | 24   | 0.364 0.373 | 470 516 158 227 268 81        | 1144 576   | 0.02     | 0.8869158     | 1  | 1.02   | 0.77          | 1.36            |
| NOR      | 3    | 0.329 0.316 | 225 216 55 233 237 44         | 496 514    | 1.83     | 0.176699      | 1  | 0.75   | 0.49          | 1.14            |
| PBCS2    | 15   | 0.359 0.375 | 732 784 238 563 671 204       | 1754 1438  | 0.25     | 0.6153418     | 1  | 1.05   | 0.86          | 1.29            |
| USRT     | 20   | 0.371 0.380 | 405 441 148 303 353 118       | 994 774    | 0.04     | 0.8353826     | 1  | 1.03   | 0.79          | 1.34            |
| WHS      | 3    | 0.356 0.340 | 301 268 106 302 288 86        | 675 676    | 2.46     | 0.1165489     | 1  | 0.78   | 0.58          | 1.06            |
| PBCS 1+2 | 20   | 0.362 0.368 | 925 1029 304 846 967 291      | 2258 2104  | 0.12     | 0.7237708     | 1  | 1.03   | 0.87          | 1.23            |

|           |         |         |          |              |
|-----------|---------|---------|----------|--------------|
| Locus     | Alleles | Chr     | Location | Neighborhood |
| rs7936636 | C T     | 11p11.2 |          | 44397546     |

| SUBSET   | Rank | MAF         | Geno Counts                 | Subjects   | score X2 | score p-value | df | hom OR | hom OR 95% CI | hom OR 95% CI_u |
|----------|------|-------------|-----------------------------|------------|----------|---------------|----|--------|---------------|-----------------|
| STAGE1-3 | 23   | 0.255 0.245 | 5896 4093 666 5545 3548 599 | 10655 9692 | 0.04     | 0.8358464     | 1  | 0.99   | 0.88          | 1.11            |
| NHS      | 20   | 0.256 0.240 | 635 430 77 673 395 77       | 1142 1145  | 0.00     | 0.9865515     | 1  | 1.00   | 0.72          | 1.38            |
| STAGE1-2 | 23   | 0.263 0.242 | 3003 2205 365 3307 2014 370 | 5573 5691  | 0.01     | 0.9179593     | 1  | 0.99   | 0.85          | 1.15            |
| STAGE2   | 23   | 0.265 0.243 | 2368 1775 288 2634 1619 293 | 4431 4546  | 0.01     | 0.9165301     | 1  | 0.99   | 0.84          | 1.17            |
| CPSII    | 19   | 0.266 0.233 | 286 224 32 323 175 37       | 542 535    | 0.46     | 0.4977648     | 1  | 1.18   | 0.73          | 1.93            |
| PBCS1    | 20   | 0.247 0.226 | 284 193 28 406 222 40       | 505 668    | 0.10     | 0.7475902     | 1  | 1.09   | 0.66          | 1.78            |
| PLCO     | 13   | 0.263 0.249 | 526 385 64 546 332 70       | 975 948    | 0.50     | 0.4802129     | 1  | 1.13   | 0.80          | 1.61            |
| WHI      | 21   | 0.270 0.247 | 1272 973 164 1359 890 146   | 2409 2395  | 1.01     | 0.3153991     | 1  | 0.89   | 0.71          | 1.12            |
| STAGE3   | 17   | 0.245 0.249 | 2893 1888 301 2238 1535 228 | 5082 4001  | 0.21     | 0.6504625     | 1  | 0.96   | 0.80          | 1.15            |
| NHS2     | 13   | 0.264 0.235 | 630 457 79 344 206 34       | 1166 584   | 0.59     | 0.444149      | 1  | 0.85   | 0.56          | 1.29            |
| NOR      | 2    | 0.192 0.237 | 326 153 19 301 185 30       | 498 516    | 2.20     | 0.1378915     | 1  | 1.56   | 0.86          | 2.80            |
| PBCS2    | 11   | 0.245 0.264 | 993 643 105 769 569 94      | 1741 1432  | 0.38     | 0.5375742     | 1  | 1.09   | 0.82          | 1.46            |
| USRT     | 4    | 0.254 0.240 | 553 376 64 442 301 37       | 993 780    | 2.35     | 0.1249335     | 1  | 0.72   | 0.48          | 1.10            |
| WHS      | 19   | 0.239 0.247 | 391 259 34 382 274 33       | 684 689    | 0.02     | 0.8761683     | 1  | 0.96   | 0.59          | 1.57            |
| PBCS 1+2 | 14   | 0.245 0.252 | 1277 836 133 1175 790 135   | 2246 2100  | 0.48     | 0.4875224     | 1  | 1.09   | 0.85          | 1.40            |

|            |         |        |          |                 |
|------------|---------|--------|----------|-----------------|
| Locus      | Alleles | Chr    | Location | Neighborhood    |
| rs12622050 | G A     | 2q11.2 |          | 100945886 NPAS2 |

| SUBSET   | Rank | MAF         | Geno Counts                 | Subjects   | score X2 | score p-value | df | hom OR | hom OR 95% CI | hom OR 95% CI_u |
|----------|------|-------------|-----------------------------|------------|----------|---------------|----|--------|---------------|-----------------|
| STAGE1-3 | 24   | 0.223 0.212 | 6394 3731 508 6029 3163 462 | 10633 9654 | 0.00     | 0.9787179     | 1  | 1.00   | 0.88          | 1.14            |
| NHS      | 14   | 0.220 0.189 | 695 392 55 754 349 42       | 1142 1145  | 1.86     | 0.1731762     | 1  | 0.75   | 0.50          | 1.13            |
| STAGE1-2 | 22   | 0.220 0.201 | 3356 1980 239 3650 1790 248 | 5575 5688  | 0.04     | 0.84884       | 1  | 1.02   | 0.85          | 1.22            |
| STAGE2   | 20   | 0.221 0.204 | 2661 1588 184 2896 1441 206 | 4433 4543  | 0.80     | 0.3725807     | 1  | 1.10   | 0.90          | 1.34            |
| CPSII    | 5    | 0.217 0.205 | 323 203 16 341 165 27       | 542 533    | 3.13     | 0.0770327     | 1  | 1.75   | 0.93          | 3.29            |
| PBCS1    | 12   | 0.244 0.239 | 284 197 25 391 235 42       | 506 668    | 0.97     | 0.3245958     | 1  | 1.29   | 0.78          | 2.15            |
| PLCO     | 8    | 0.229 0.199 | 577 350 48 606 307 35       | 975 948    | 1.76     | 0.1841365     | 1  | 0.74   | 0.47          | 1.16            |
| WHI      | 22   | 0.213 0.196 | 1477 838 95 1558 734 102    | 2410 2394  | 0.31     | 0.5775141     | 1  | 1.08   | 0.82          | 1.44            |
| STAGE3   | 24   | 0.226 0.227 | 3039 1753 269 2380 1375 213 | 5061 3968  | 0.01     | 0.9118169     | 1  | 1.01   | 0.84          | 1.22            |
| NHS2     | 6    | 0.205 0.202 | 734 358 56 359 188 21       | 1148 568   | 1.24     | 0.2661771     | 1  | 0.75   | 0.45          | 1.25            |

|          |    |             |                           |           |      |           |   |      |      |      |
|----------|----|-------------|---------------------------|-----------|------|-----------|---|------|------|------|
| NOR      | 12 | 0.221 0.219 | 297 179 20 314 175 25     | 496 514   | 0.41 | 0.5219577 | 1 | 1.22 | 0.67 | 2.22 |
| PBCS2    | 19 | 0.252 0.258 | 980 644 117 793 540 99    | 1741 1432 | 0.05 | 0.8298177 | 1 | 1.03 | 0.78 | 1.36 |
| USRT     | 12 | 0.206 0.205 | 626 327 41 495 242 38     | 994 775   | 0.62 | 0.4315764 | 1 | 1.20 | 0.76 | 1.88 |
| WHS      | 15 | 0.231 0.214 | 402 245 35 419 230 30     | 682 679   | 0.38 | 0.53702   | 1 | 0.85 | 0.52 | 1.41 |
| PBCS 1+2 | 18 | 0.250 0.252 | 1263 839 142 1183 773 142 | 2244 2098 | 0.34 | 0.5575498 | 1 | 1.07 | 0.84 | 1.37 |

**Supplementary Table 2. Results of Combined Analysis of Multi-stage Analysis of Breast Cancer with Stages 1, 2 and 3 for 24 SNPs for ER+ Cases Only Compared to Controls**

**Data dictionary**

Locus – dbSNP ID  
 Alleles – SNP alleles, listed as major|minor  
 Chr – chromosomal mapping  
 Location – chromosomal location based on NCBI genome build 36.3  
 Neighborhood – known protein-coding gene(s) within the vicinity, if the SNP lies within 20kb 5' of the start of transcription of the gene and 10kb 3' of the last exon.  
 SUBSET – Analytic subset of the data  
 Rank – p value rank relative to the 24 SNPs within each study  
 MAF – Minor allele frequency (controls|cases)  
 Geno counts – genotype counts for each observed genotype (Major homozygote controls|heterozygote controls|minor homozygote controls/ Major homozygote cases|heterozygote cases|minor homozygote cases)  
 Subjects – number of subjects (controls|cases)  
 Score X2 – X2 statistic for association by a Score test  
 Score p-value – significance level for X2 statistic  
 df – degrees of freedom of X2 statistic  
 het OR – Odds ratio for the heterozygote genotype (not included for recessive models)  
 het OR 95% CI\_l – lower bound of the 95% confidence interval of the Odds ratio  
 het OR 95% CI\_u – upper bound of the 95% confidence interval of the Odds ratio

**Supplementary Table results:**

adj\_gen0 – covariate adjusted, genotype-specific effect model  
 adj\_trend – covariate adjusted, trend effect model  
 adj\_rec – covariate adjusted, recessive effect model  
 unadj\_gen0 – unadjusted, genotype-specific effect model  
 unadj\_trend – unadjusted, trend effect model  
 unadj\_rec – unadjusted, recessive effect model

**adj\_gen0**

| Locus      | Alleles | Chr     | Location | Neighborhood        | Rank | MAF         | Geno Counts                  | Subjects  | score X2 | score p-value | df | het OR | het OR 95% CI_l | het OR 95% CI_u | hom OR | hom OR 95% CI_l | hom OR 95% CI_u |
|------------|---------|---------|----------|---------------------|------|-------------|------------------------------|-----------|----------|---------------|----|--------|-----------------|-----------------|--------|-----------------|-----------------|
| rs11249433 | T C     | 1p11.2  |          | 120982136 LOC647121 |      |             |                              |           |          |               |    |        |                 |                 |        |                 |                 |
| STAGE1-3   |         |         |          |                     | 1    | 0.395 0.441 | 3255 4114 1412 1590 2476 993 | 8781 5059 | 49.61    | 1.691E-11     | 2  | 1.22   | 1.13            | 1.32            | 1.42   | 1.28            | 1.57            |
| NHS        |         |         |          |                     | 1    | 0.388 0.448 | 425 540 170 238 411 155      | 1135 804  | 14.71    | 0.0006386     | 2  | 1.37   | 1.11            | 1.68            | 1.62   | 1.24            | 2.12            |
| STAGE1-2   |         |         |          |                     | 2    | 0.403 0.443 | 1899 2491 874 1070 1756 674  | 5264 3500 | 31.75    | 1.277E-07     | 2  | 1.26   | 1.15            | 1.39            | 1.37   | 1.21            | 1.56            |
| STAGE2     |         |         |          |                     | 6    | 0.407 0.442 | 1474 1951 704 832 1345 519   | 4129 2696 | 19.00    | 0.00007486    | 2  | 1.24   | 1.11            | 1.38            | 1.31   | 1.13            | 1.51            |
| CPSII      |         |         |          |                     | 10   | 0.378 0.405 | 220 235 88 108 159 48        | 543 315   | 3.52     | 0.172211      | 2  | 1.33   | 0.98            | 1.82            | 1.09   | 0.71            | 1.66            |
| PBCS1      |         |         |          |                     | 18   | 0.387 0.407 | 195 230 81 124 171 58        | 506 353   | 1.45     | 0.4834956     | 2  | 1.21   | 0.89            | 1.63            | 1.09   | 0.72            | 1.65            |
| PLCO       |         |         |          |                     | 19   | 0.420 0.427 | 324 476 169 140 232 75       | 969 447   | 1.19     | 0.5517388     | 2  | 1.14   | 0.89            | 1.48            | 1.04   | 0.74            | 1.46            |
| WHI        |         |         |          |                     | 2    | 0.407 0.455 | 857 1133 411 514 857 359     | 2401 1730 | 19.51    | 0.00005814    | 2  | 1.26   | 1.10            | 1.45            | 1.46   | 1.22            | 1.75            |
| STAGE3     |         |         |          |                     | 1    | 0.383 0.436 | 1360 1625 538 520 720 319    | 3523 1559 | 20.77    | 0.00003093    | 2  | 1.13   | 0.99            | 1.30            | 1.50   | 1.26            | 1.79            |
| NHS2       |         |         |          |                     | 1    | 0.395 0.446 | 418 522 182 107 147 72       | 1122 326  | 6.47     | 0.0394376     | 2  | 1.10   | 0.83            | 1.46            | 1.55   | 1.09            | 2.19            |
| PBCS2      |         |         |          |                     | 1    | 0.362 0.410 | 719 778 240 246 324 121      | 1737 691  | 9.24     | 0.0098565     | 2  | 1.22   | 1.00            | 1.48            | 1.48   | 1.14            | 1.93            |
| WHS        |         |         |          |                     | 1    | 0.419 0.462 | 223 325 116 167 249 126      | 664 542   | 6.43     | 0.04014       | 2  | 1.02   | 0.79            | 1.33            | 1.46   | 1.06            | 2.02            |
| PBCS 1+2   |         |         |          |                     | 1    | 0.368 0.409 | 910 1006 321 370 495 179     | 2237 1044 | 8.61     | 0.0134998     | 2  | 1.20   | 1.02            | 1.41            | 1.36   | 1.09            | 1.69            |
| rs999737   | C T     | 14q24.1 |          | 68104435 RAD51L1    |      |             |                              |           |          |               |    |        |                 |                 |        |                 |                 |

| SUBSET   | Rank | MAF         | Geno Counts                 | Subjects  | score X2 | score p-value | df | het OR | het OR 95% l | het OR 95% f | hom OR | hom OR 95% | hom OR 95% Cl_u |
|----------|------|-------------|-----------------------------|-----------|----------|---------------|----|--------|--------------|--------------|--------|------------|-----------------|
| STAGE1-3 | 2    | 0.238 0.215 | 5166 3096 548/3130 1743 227 | 8810 5100 | 21.57    | 0.00002074    | 2  | 0.93   | 0.87         | 1.01         | 0.69   | 0.58       | 0.81            |
| NHS      | 8    | 0.244 0.209 | 660 405 76/499 278 30       | 1141 807  | 8.97     | 0.0113029     | 2  | 0.91   | 0.75         | 1.10         | 0.52   | 0.33       | 0.81            |
| STAGE1-2 | 9    | 0.239 0.211 | 3092 1862 330/2185 1182 150 | 5284 3517 | 20.74    | 0.00003134    | 2  | 0.90   | 0.82         | 0.99         | 0.64   | 0.53       | 0.79            |
| STAGE2   | 12   | 0.237 0.211 | 2432 1457 254/1686 904 120  | 4143 2710 | 13.00    | 0.0015028     | 2  | 0.90   | 0.81         | 1.00         | 0.68   | 0.54       | 0.86            |
| CPSII    | 21   | 0.235 0.223 | 319 193 31/193 105 18       | 543 316   | 0.38     | 0.8256143     | 2  | 0.91   | 0.67         | 1.23         | 0.93   | 0.51       | 1.72            |
| PBCS1    | 3    | 0.242 0.203 | 291 185 30/219 125 9        | 506 353   | 6.49     | 0.0390619     | 2  | 0.89   | 0.67         | 1.20         | 0.38   | 0.18       | 0.83            |
| PLCO     | 2    | 0.238 0.225 | 576 334 65/262 170 16       | 975 448   | 6.66     | 3.58E-02      | 2  | 1.14   | 0.89         | 1.44         | 0.54   | 0.30       | 0.96            |
| WHI      | 12   | 0.235 0.208 | 1416 854 139/1100 559 83    | 2409 1742 | 8.52     | 0.0140877     | 2  | 0.84   | 0.74         | 0.96         | 0.76   | 0.57       | 1.01            |
| STAGE3   | 10   | 0.237 0.226 | 2075 1237 218/946 562 77    | 3530 1585 | 2.90     | 0.234108      | 2  | 0.99   | 0.87         | 1.13         | 0.79   | 0.60       | 1.04            |
| NHS2     | 19   | 0.234 0.233 | 664 362 77/198 115 20       | 1103 333  | 0.64     | 0.7260858     | 2  | 1.07   | 0.82         | 1.40         | 0.88   | 0.52       | 1.47            |
| PBCS2    | 15   | 0.236 0.224 | 1016 637 94/422 248 34      | 1747 704  | 0.62     | 0.7349966     | 2  | 0.94   | 0.78         | 1.13         | 0.89   | 0.59       | 1.34            |
| WHS      | 5    | 0.244 0.224 | 395 238 47/326 199 23       | 680 548   | 3.94     | 0.1393825     | 2  | 1.01   | 0.79         | 1.28         | 0.60   | 0.36       | 1.01            |
| PBCS 1+2 | 7    | 0.237 0.217 | 1306 819 124/640 372 43     | 2249 1055 | 3.66     | 0.1600936     | 2  | 0.93   | 0.79         | 1.08         | 0.72   | 0.50       | 1.03            |

Locus Alleles Chr Location Neighborhood  
rs7121523 G|A 11p15.4 7556781 PPFIBP2

| SUBSET   | Rank | MAF         | Geno Counts                 | Subjects  | score X2 | score p-value | df | het OR | het OR 95% l | het OR 95% f | hom OR | hom OR 95% | hom OR 95% Cl_u |
|----------|------|-------------|-----------------------------|-----------|----------|---------------|----|--------|--------------|--------------|--------|------------|-----------------|
| STAGE1-3 | 3    | 0.156 0.160 | 6264 2378 185/3629 1305 166 | 8827 5100 | 19.62    | 0.00005499    | 2  | 0.94   | 0.87         | 1.02         | 1.55   | 1.25       | 1.93            |
| NHS      | 13   | 0.159 0.168 | 807 306 28/572 199 36       | 1141 807  | 6.73     | 0.0346298     | 2  | 0.92   | 0.75         | 1.13         | 1.83   | 1.10       | 3.05            |
| STAGE1-2 | 3    | 0.155 0.161 | 3739 1443 99/2508 881 126   | 5281 3515 | 28.23    | 7.429E-07     | 2  | 0.91   | 0.82         | 1.00         | 1.88   | 1.44       | 2.47            |
| STAGE2   | 2    | 0.154 0.159 | 2932 1137 71/1936 682 90    | 4140 2708 | 21.39    | 0.00002262    | 2  | 0.90   | 0.81         | 1.01         | 1.91   | 1.39       | 2.62            |
| CPSII    | 13   | 0.173 0.171 | 368 161 13/220 84 12        | 542 316   | 2.87     | 0.2379985     | 2  | 0.84   | 0.61         | 1.15         | 1.60   | 0.71       | 3.59            |
| PBCS1    | 1    | 0.138 0.156 | 373 123 8/259 76 17         | 504 352   | 9.31     | 0.0095011     | 2  | 0.86   | 0.62         | 1.20         | 3.27   | 1.38       | 7.77            |
| PLCO     | 17   | 0.156 0.160 | 688 270 17/318 117 13       | 975 448   | 1.73     | 0.4208722     | 2  | 0.92   | 0.71         | 1.19         | 1.50   | 0.71       | 3.17            |
| WHI      | 10   | 0.154 0.157 | 1704 664 40/1244 446 51     | 2408 1741 | 9.04     | 0.0108737     | 2  | 0.92   | 0.80         | 1.06         | 1.75   | 1.15       | 2.67            |
| STAGE3   | 22   | 0.156 0.159 | 2525 935 85/1121 424 40     | 3545 1585 | 0.17     | 0.9182276     | 2  | 1.01   | 0.88         | 1.16         | 1.08   | 0.73       | 1.60            |
| NHS2     | 12   | 0.167 0.151 | 777 314 30/246 82 10        | 1121 338  | 1.81     | 0.4047437     | 2  | 0.83   | 0.62         | 1.10         | 1.05   | 0.51       | 2.18            |
| PBCS2    | 14   | 0.148 0.158 | 1266 440 38/496 184 18      | 1744 698  | 0.76     | 0.6848511     | 2  | 1.06   | 0.87         | 1.30         | 1.23   | 0.69       | 2.19            |
| WHS      | 20   | 0.158 0.166 | 482 181 17/379 158 12       | 680 549   | 0.60     | 0.7418528     | 2  | 1.10   | 0.85         | 1.41         | 0.93   | 0.44       | 1.98            |
| PBCS 1+2 | 4    | 0.146 0.157 | 1639 563 47/755 260 35      | 2249 1050 | 4.40     | 0.1108098     | 2  | 1.02   | 0.86         | 1.21         | 1.61   | 1.03       | 2.53            |

Locus Alleles Chr Location Neighborhood  
rs7716600 C|A 5p12 44910762

| SUBSET   | Rank | MAF         | Geno Counts                 | Subjects  | score X2 | score p-value | df | het OR | het OR 95% l | het OR 95% f | hom OR | hom OR 95% | hom OR 95% Cl_u |
|----------|------|-------------|-----------------------------|-----------|----------|---------------|----|--------|--------------|--------------|--------|------------|-----------------|
| STAGE1-3 | 4    | 0.220 0.243 | 5382 3016 434/2950 1835 322 | 8832 5107 | 18.94    | 0.00007703    | 2  | 1.11   | 1.03         | 1.20         | 1.35   | 1.16       | 1.57            |
| NHS      | 6    | 0.215 0.253 | 693 401 44/451 303 53       | 1138 807  | 9.52     | 0.0085743     | 2  | 1.16   | 0.95         | 1.40         | 1.86   | 1.22       | 2.82            |
| STAGE1-2 | 1    | 0.216 0.248 | 3227 1822 226/2015 1256 243 | 5275 3514 | 32.07    | 1.085E-07     | 2  | 1.11   | 1.01         | 1.21         | 1.71   | 1.41       | 2.06            |
| STAGE2   | 1    | 0.216 0.246 | 2534 1421 182/1564 953 190  | 4137 2707 | 22.85    | 0.0000109     | 2  | 1.09   | 0.98         | 1.21         | 1.67   | 1.35       | 2.07            |
| CPSII    | 18   | 0.225 0.241 | 325 192 26/186 108 22       | 543 316   | 1.00     | 0.6051402     | 2  | 0.98   | 0.73         | 1.32         | 1.34   | 0.73       | 2.45            |
| PBCS1    | 5    | 0.217 0.272 | 308 173 23/186 139 26       | 504 351   | 6.12     | 0.0469141     | 2  | 1.29   | 0.97         | 1.74         | 1.87   | 1.03       | 3.41            |
| PLCO     | 20   | 0.223 0.232 | 577 359 37/261 166 21       | 973 448   | 0.82     | 0.6633659     | 2  | 1.01   | 0.80         | 1.29         | 1.30   | 0.74       | 2.27            |
| WHI      | 4    | 0.212 0.248 | 1499 797 111/1010 600 131   | 2407 1741 | 18.18    | 0.0001131     | 2  | 1.12   | 0.98         | 1.28         | 1.75   | 1.34       | 2.28            |
| STAGE3   | 3    | 0.226 0.231 | 2155 1196 208/936 581 78    | 3559 1595 | 4.88     | 0.0871987     | 2  | 1.12   | 0.99         | 1.27         | 1.07   | 0.66       | 1.14            |
| NHS2     | 11   | 0.229 0.230 | 676 383 66/198 126 15       | 1125 339  | 1.84     | 0.3979516     | 2  | 1.12   | 0.87         | 1.45         | 0.78   | 0.43       | 1.39            |
| PBCS2    | 10   | 0.223 0.233 | 1070 586 98/417 254 38      | 1754 709  | 1.25     | 0.5339971     | 2  | 1.11   | 0.92         | 1.34         | 1.02   | 0.69       | 1.51            |
| WHS      | 8    | 0.232 0.229 | 409 227 44/321 201 25       | 680 547   | 2.98     | 0.2258697     | 2  | 1.13   | 0.89         | 1.44         | 0.73   | 0.44       | 1.22            |
| PBCS 1+2 | 3    | 0.221 0.246 | 1378 757 121/602 391 65     | 2256 1058 | 4.58     | 0.1012678     | 2  | 1.17   | 1.00         | 1.37         | 1.22   | 0.89       | 1.68            |

Locus Alleles Chr Location Neighborhood  
rs9491859 C|A 6q22.33 128106056 C6orf190

| SUBSET   | Rank | MAF         | Geno Counts                  | Subjects  | score X2 | score p-value | df | het OR | het OR 95% CI | het OR 95% CI | hom OR | hom OR 95% CI | hom OR 95% CI_u |
|----------|------|-------------|------------------------------|-----------|----------|---------------|----|--------|---------------|---------------|--------|---------------|-----------------|
| STAGE1-3 | 5    | 0.352 0.377 | 3704 4014 1097 2017 2314 764 | 8815 5095 | 18.94    | 0.00007725    | 2  | 1.05   | 0.97          | 1.13          | 1.27   | 1.14          | 1.42            |
| NHS      | 14   | 0.356 0.375 | 459 551 130/325 359 123      | 1140 807  | 6.30     | 0.0428622     | 2  | 0.91   | 0.75          | 1.11          | 1.31   | 0.98          | 1.74            |
| STAGE1-2 | 10   | 0.348 0.377 | 2226 2432 625/1401 1579 536  | 5283 3516 | 19.87    | 0.00004853    | 2  | 1.03   | 0.94          | 1.13          | 1.34   | 1.18          | 1.54            |
| STAGE2   | 7    | 0.346 0.378 | 1767 1881 495/1076 1220 413  | 4143 2709 | 15.25    | 0.0004869     | 2  | 1.06   | 0.96          | 1.18          | 1.35   | 1.16          | 1.58            |
| CPSII    | 11   | 0.350 0.351 | 220 266 57/137 136 43        | 543 316   | 3.40     | 0.1827009     | 2  | 0.81   | 0.60          | 1.10          | 1.18   | 0.75          | 1.87            |
| PBCS1    | 19   | 0.345 0.364 | 216 231 59/147 154 51        | 506 352   | 1.06     | 0.5890937     | 2  | 0.98   | 0.73          | 1.32          | 1.23   | 0.79          | 1.90            |
| PLCO     | 5    | 0.333 0.376 | 437 427 111/170 219 59       | 975 448   | 5.38     | 0.0677716     | 2  | 1.32   | 1.03          | 1.68          | 1.31   | 0.91          | 1.90            |
| WHI      | 6    | 0.351 0.384 | 1018 1093 298/682 781 279    | 2409 1742 | 12.26    | 0.002174      | 2  | 1.06   | 0.93          | 1.22          | 1.40   | 1.16          | 1.70            |
| STAGE3   | 11   | 0.358 0.377 | 1479 1586 472/617 735 228    | 3537 1580 | 2.74     | 0.2536781     | 2  | 1.09   | 0.96          | 1.24          | 1.15   | 0.95          | 1.38            |
| NHS2     | 22   | 0.368 0.371 | 459 501 163/139 147 52       | 1123 338  | 0.22     | 0.897915      | 2  | 0.97   | 0.74          | 1.26          | 1.05   | 0.73          | 1.51            |
| PBCS2    | 13   | 0.349 0.365 | 744 779 218/286 322 96       | 1741 704  | 1.01     | 0.6039309     | 2  | 1.07   | 0.89          | 1.29          | 1.14   | 0.86          | 1.50            |
| WHS      | 4    | 0.363 0.396 | 276 306 91/192 266 80        | 673 538   | 3.96     | 0.1382315     | 2  | 1.26   | 0.98          | 1.61          | 1.30   | 0.91          | 1.85            |
| PBCS 1+2 | 13   | 0.348 0.365 | 959 1006 277/432 476 147     | 2242 1055 | 2.10     | 0.3500615     | 2  | 1.05   | 0.90          | 1.24          | 1.19   | 0.94          | 1.50            |

Locus Alleles Chr Location Neighborhood  
rs2067980 A|G 5p12 45018074

| SUBSET   | Rank | MAF         | Geno Counts                 | Subjects  | score X2 | score p-value | df | het OR | het OR 95% CI | het OR 95% CI | hom OR | hom OR 95% CI | hom OR 95% CI_u |
|----------|------|-------------|-----------------------------|-----------|----------|---------------|----|--------|---------------|---------------|--------|---------------|-----------------|
| STAGE1-3 | 6    | 0.160 0.176 | 6228 2348 240/3497 1411 190 | 8816 5098 | 17.62    | 0.0001493     | 2  | 1.08   | 0.99          | 1.16          | 1.49   | 1.22          | 1.82            |
| NHS      | 11   | 0.151 0.179 | 814 310 17/542 240 24       | 1141 806  | 7.54     | 0.023108      | 2  | 1.18   | 0.96          | 1.44          | 2.13   | 1.13          | 4.02            |
| STAGE1-2 | 4    | 0.150 0.175 | 3805 1374 105/2412 975 129  | 5284 3516 | 28.21    | 7.481E-07     | 2  | 1.11   | 1.01          | 1.23          | 1.96   | 1.50          | 2.55            |
| STAGE2   | 3    | 0.150 0.174 | 2991 1064 88/1870 735 105   | 4143 2710 | 20.94    | 0.0000284     | 2  | 1.10   | 0.98          | 1.23          | 1.92   | 1.43          | 2.57            |
| CPSII    | 17   | 0.159 0.171 | 383 147 13/221 82 13        | 543 316   | 1.34     | 0.5123511     | 2  | 0.94   | 0.68          | 1.30          | 1.53   | 0.69          | 3.39            |
| PBCS1    | 7    | 0.191 0.231 | 335 149 22/208 127 18       | 506 353   | 5.05     | 0.0801812     | 2  | 1.39   | 1.03          | 1.87          | 1.38   | 0.72          | 2.66            |
| PLCO     | 18   | 0.144 0.156 | 714 241 20/322 112 14       | 975 448   | 1.46     | 0.4822906     | 2  | 1.01   | 0.77          | 1.31          | 1.54   | 0.76          | 3.11            |
| WHI      | 3    | 0.143 0.170 | 1761 606 42/1216 460 66     | 2409 1742 | 18.41    | 0.0001004     | 2  | 1.10   | 0.96          | 1.27          | 2.28   | 1.54          | 3.38            |
| STAGE3   | 23   | 0.176 0.177 | 2423 975 135/1085 437 61    | 3533 1583 | 0.14     | 0.930503      | 2  | 1.01   | 0.89          | 1.16          | 1.06   | 0.77          | 1.45            |
| NHS2     | 16   | 0.169 0.161 | 777 292 42/240 79 14        | 1111 333  | 0.94     | 0.6240002     | 2  | 0.88   | 0.66          | 1.17          | 1.08   | 0.58          | 2.01            |
| PBCS2    | 22   | 0.190 0.188 | 1158 519 73/467 211 27      | 1750 705  | 0.10     | 0.9515743     | 2  | 1.01   | 0.83          | 1.22          | 0.93   | 0.59          | 1.47            |
| WHS      | 10   | 0.152 0.172 | 488 164 20/378 147 20       | 672 545   | 1.73     | 0.4213178     | 2  | 1.16   | 0.89          | 1.51          | 1.30   | 0.69          | 2.45            |
| PBCS 1+2 | 17   | 0.190 0.202 | 1493 667 95/675 337 45      | 2255 1057 | 1.32     | 0.516911      | 2  | 1.10   | 0.94          | 1.29          | 1.03   | 0.71          | 1.49            |

Locus Alleles Chr Location Neighborhood  
rs2303659 G|A 11q24.3 129326474 PRDM10

| SUBSET   | Rank | MAF         | Geno Counts            | Subjects  | score X2 | score p-value | df | het OR | het OR 95% CI | het OR 95% CI | hom OR | hom OR 95% CI | hom OR 95% CI_u |
|----------|------|-------------|------------------------|-----------|----------|---------------|----|--------|---------------|---------------|--------|---------------|-----------------|
| STAGE1-3 | 7    | 0.034 0.026 | 8222 583 10/4833 251 9 | 8815 5093 | 16.85    | 0.0002193     | 2  | 0.74   | 0.63          | 0.86          | 1.75   | 0.70          | 4.42            |
| NHS      | 22   | 0.034 0.026 | 1063 78 0/765 42 0     | 1141 807  |          |               |    |        |               |               |        |               |                 |
| STAGE1-2 | 17   | 0.034 0.025 | 4926 356 2/3341 174 2  | 5284 3517 | 12.29    | 0.0021428     | 2  | 0.72   | 0.60          | 0.87          | 1.61   | 0.22          | 11.68           |
| STAGE2   | 15   | 0.034 0.025 | 3863 278 2/2576 132 2  | 4143 2710 | 10.34    | 0.00568       | 2  | 0.71   | 0.57          | 0.88          | 1.62   | 0.22          | 11.72           |
| CPSII    | 24   | 0.030 0.019 | 510 33 0/305 10 1      | 543 316   |          |               |    |        |               |               |        |               |                 |
| PBCS1    | 22   | 0.033 0.024 | 473 33 0/336 17 0      | 506 353   |          |               |    |        |               |               |        |               |                 |
| PLCO     | 24   | 0.036 0.026 | 906 68 1/425 23 0      | 975 448   |          |               |    |        |               |               |        |               |                 |
| WHI      | 14   | 0.034 0.025 | 2245 163 1/1655 86 1   | 2409 1742 | 6.29     | 0.0431654     | 2  | 0.71   | 0.54          | 0.93          | 1.38   | 0.09          | 22.07           |
| STAGE3   | 4    | 0.034 0.029 | 3296 227 8/1493 77 7   | 3531 1577 | 4.78     | 0.0915615     | 2  | 0.78   | 0.59          | 1.02          | 1.82   | 0.64          | 5.17            |
| NHS2     | 4    | 0.039 0.030 | 1029 77 5/321 14 3     | 1111 338  | 4.15     | 0.1258279     | 2  | 0.59   | 0.33          | 1.05          | 1.90   | 0.45          | 8.02            |
| PBCS2    | 24   | 0.032 0.028 | 1648 112 1/669 40 0    | 1761 709  |          |               |    |        |               |               |        |               |                 |
| WHS      | 9    | 0.032 0.029 | 619 38 2/503 23 4      | 659 530   | 1.93     | 0.3800476     | 2  | 0.77   | 0.45          | 1.32          | 2.34   | 0.42          | 12.91           |
| PBCS 1+2 | 24   | 0.032 0.027 | 2121 145 1/1004 57 0   | 2267 1061 |          |               |    |        |               |               |        |               |                 |

Locus Alleles Chr Location Neighborhood  
rs12608723 A|G 19q13.11 38508973

| SUBSET   | Rank | MAF         | Geno Counts                | Subjects  | score X2 | score p-value | df | het OR | het OR 95% CI | het OR 95% CI | hom OR | hom OR 95% CI | hom OR 95% CI_u |
|----------|------|-------------|----------------------------|-----------|----------|---------------|----|--------|---------------|---------------|--------|---------------|-----------------|
| STAGE1-3 | 8    | 0.136 0.121 | 6618 2036 188/3939 1089 75 | 8842 5103 | 16.65    | 0.0002425     | 2  | 0.88   | 0.81          | 0.96          | 0.65   | 0.49          | 0.85            |
| NHS      | 7    | 0.153 0.121 | 818 296 27/624 169 13      | 1141 806  | 9.11     | 0.0105183     | 2  | 0.74   | 0.59          | 0.92          | 0.61   | 0.31          | 1.19            |
| STAGE1-2 | 12   | 0.143 0.122 | 3887 1281 116/2710 757 49  | 5284 3516 | 18.51    | 0.00009569    | 2  | 0.84   | 0.76          | 0.93          | 0.60   | 0.43          | 0.84            |
| STAGE2   | 14   | 0.140 0.122 | 3069 985 89/2086 588 36    | 4143 2710 | 11.12    | 0.0038411     | 2  | 0.87   | 0.78          | 0.98          | 0.60   | 0.40          | 0.88            |
| CPSII    | 6    | 0.140 0.114 | 398 138 7/250 60 6         | 543 316   | 4.19     | 0.1231113     | 2  | 0.72   | 0.51          | 1.02          | 1.49   | 0.49          | 4.55            |
| PBCS1    | 4    | 0.153 0.110 | 364 129 13/278 72 3        | 506 353   | 6.29     | 0.0430154     | 2  | 0.73   | 0.52          | 1.01          | 0.33   | 0.09          | 1.20            |
| PLCO     | 10   | 0.132 0.116 | 738 216 21/348 96 4        | 975 448   | 2.93     | 0.231421      | 2  | 0.94   | 0.71          | 1.23          | 0.41   | 0.14          | 1.21            |
| WHI      | 16   | 0.141 0.126 | 1783 572 54/1330 386 26    | 2409 1742 | 4.75     | 0.0929904     | 2  | 0.91   | 0.78          | 1.05          | 0.64   | 0.40          | 1.03            |
| STAGE3   | 13   | 0.127 0.122 | 2733 758 72/1229 335 26    | 3563 1590 | 1.31     | 0.5193619     | 2  | 0.98   | 0.84          | 1.13          | 0.77   | 0.48          | 1.22            |
| NHS2     | 21   | 0.126 0.118 | 869 243 21/261 69 5        | 1133 335  | 0.29     | 0.8663792     | 2  | 0.95   | 0.70          | 1.28          | 0.81   | 0.30          | 2.16            |
| PBCS2    | 19   | 0.124 0.119 | 1344 368 32/554 145 12     | 1744 711  | 0.24     | 0.8866501     | 2  | 0.95   | 0.77          | 1.19          | 0.91   | 0.46          | 1.79            |
| WHS      | 11   | 0.135 0.128 | 520 147 19/414 121 9       | 686 544   | 1.70     | 0.4269626     | 2  | 1.03   | 0.78          | 1.36          | 0.60   | 0.27          | 1.34            |
| PBCS 1+2 | 6    | 0.130 0.115 | 1706 494 45/832 214 15     | 2245 1061 | 3.67     | 0.1598257     | 2  | 0.87   | 0.73          | 1.05          | 0.67   | 0.37          | 1.21            |

Locus Alleles Chr Location Neighborhood  
rs10850145 C|T 12q24.13 112428512

| SUBSET   | Rank | MAF         | Geno Counts               | Subjects  | score X2 | score p-value | df | het OR | het OR 95% CI | het OR 95% CI | hom OR | hom OR 95% CI | hom OR 95% CI_u |
|----------|------|-------------|---------------------------|-----------|----------|---------------|----|--------|---------------|---------------|--------|---------------|-----------------|
| STAGE1-3 | 9    | 0.094 0.109 | 7261 1521 74/4054 1012 52 | 8856 5118 | 16.24    | 0.0002972     | 2  | 1.19   | 1.09          | 1.30          | 1.30   | 0.90          | 1.87            |
| NHS      | 12   | 0.085 0.108 | 951 185 5/642 155 10      | 1141 807  | 7.45     | 0.0241496     | 2  | 1.25   | 0.98          | 1.58          | 1.30   | 1.04          | 9.09            |
| STAGE1-2 | 11   | 0.089 0.110 | 4388 849 47/2781 693 41   | 5284 3515 | 19.10    | 0.00007109    | 2  | 1.27   | 1.14          | 1.42          | 1.36   | 0.89          | 2.08            |
| STAGE2   | 8    | 0.090 0.111 | 3437 664 42/2139 538 31   | 4143 2708 | 14.76    | 0.0006233     | 2  | 1.28   | 1.13          | 1.46          | 1.16   | 0.72          | 1.86            |
| CPSII    | 15   | 0.099 0.111 | 444 90 9/250 62 4         | 543 316   | 1.72     | 0.4231034     | 2  | 1.25   | 0.87          | 1.80          | 0.78   | 0.24          | 2.61            |
| PBCS1    | 11   | 0.094 0.123 | 417 83 6/270 79 4         | 506 353   | 3.97     | 0.1371373     | 2  | 1.43   | 1.01          | 2.03          | 1.06   | 0.29          | 3.87            |
| PLCO     | 3    | 0.077 0.106 | 832 135 8/357 87 4        | 975 448   | 6.36     | 0.041529      | 2  | 1.47   | 1.09          | 1.99          | 1.17   | 0.34          | 3.97            |
| WHI      | 13   | 0.094 0.110 | 1982 403 24/1378 341 21   | 2409 1740 | 6.30     | 0.0428281     | 2  | 1.22   | 1.04          | 1.43          | 1.28   | 0.70          | 2.31            |
| STAGE3   | 19   | 0.102 0.106 | 2873 673 27/1275 319 11   | 3573 1605 | 0.68     | 0.7130201     | 2  | 1.05   | 0.90          | 1.22          | 1.21   | 0.60          | 2.47            |
| NHS2     | 14   | 0.103 0.099 | 905 207 12/280 56 6       | 1124 342  | 1.66     | 0.4369315     | 2  | 0.87   | 0.63          | 1.21          | 1.61   | 0.60          | 4.33            |
| PBCS2    | 20   | 0.104 0.107 | 1412 338 15/565 143 5     | 1765 713  | 0.23     | 0.8925055     | 2  | 1.05   | 0.84          | 1.31          | 0.90   | 0.32          | 2.51            |
| WHS      | 24   | 0.094 0.109 | 556 128 0/430 120 0       | 684 550   |          |               |    |        |               |               |        |               |                 |
| PBCS 1+2 | 10   | 0.102 0.113 | 1829 420 21/833 222 9     | 2270 1064 | 2.61     | 0.2717919     | 2  | 1.16   | 0.97          | 1.39          | 0.90   | 0.41          | 2.00            |

Locus Alleles Chr Location Neighborhood  
rs4415084 C|T 5p12 44698272

| SUBSET   | Rank | MAF         | Geno Counts                  | Subjects  | score X2 | score p-value | df | het OR | het OR 95% CI | het OR 95% CI | hom OR | hom OR 95% CI | hom OR 95% CI_u |
|----------|------|-------------|------------------------------|-----------|----------|---------------|----|--------|---------------|---------------|--------|---------------|-----------------|
| STAGE1-3 | 10   | 0.407 0.431 | 3135 4180 1492/1673 2433 970 | 8807 5076 | 15.44    | 0.0004428     | 2  | 1.09   | 1.01          | 1.18          | 1.22   | 1.11          | 1.36            |
| NHS      | 2    | 0.392 0.437 | 429 513 185/240 421 139      | 1127 800  | 13.27    | 0.0013121     | 2  | 1.46   | 1.19          | 1.79          | 1.34   | 1.02          | 1.75            |
| STAGE1-2 | 15   | 0.401 0.429 | 1895 2517 857/1154 1698 657  | 5269 3509 | 12.80    | 0.0016655     | 2  | 1.10   | 1.00          | 1.21          | 1.26   | 1.11          | 1.43            |
| STAGE2   | 17   | 0.404 0.427 | 1466 2004 672/914 1277 518   | 4142 2709 | 9.49     | 0.0086806     | 2  | 1.02   | 0.91          | 1.14          | 1.23   | 1.07          | 1.42            |
| CPSII    | 12   | 0.427 0.389 | 178 265 99/121 144 51        | 542 316   | 2.92     | 0.2321868     | 2  | 0.80   | 0.59          | 1.09          | 0.73   | 0.48          | 1.11            |
| PBCS1    | 10   | 0.410 0.463 | 174 249 83/97 185 71         | 506 353   | 4.36     | 0.1130617     | 2  | 1.33   | 0.96          | 1.82          | 1.47   | 0.98          | 2.21            |
| PLCO     | 16   | 0.408 0.407 | 339 475 160/163 205 80       | 974 448   | 1.88     | 0.3899788     | 2  | 0.86   | 0.67          | 1.11          | 1.02   | 0.74          | 1.43            |
| WHI      | 9    | 0.400 0.429 | 866 1158 385/588 813 340     | 2409 1741 | 9.35     | 0.009336      | 2  | 1.04   | 0.91          | 1.19          | 1.31   | 1.09          | 1.57            |
| STAGE3   | 7    | 0.415 0.435 | 1240 1666 636/520 739 315    | 3542 1574 | 3.89     | 0.1427696     | 2  | 1.07   | 0.93          | 1.22          | 1.19   | 1.00          | 1.41            |
| NHS2     | 3    | 0.402 0.449 | 413 517 193/105 156 71       | 1123 332  | 4.38     | 0.1117045     | 2  | 1.19   | 0.90          | 1.57          | 1.44   | 1.02          | 2.04            |
| PBCS2    | 11   | 0.424 0.440 | 593 833 328/226 346 140      | 1754 712  | 1.12     | 0.5725758     | 2  | 1.10   | 0.90          | 1.34          | 1.12   | 0.87          | 1.45            |
| WHS      | 12   | 0.411 0.420 | 234 316 115/189 237 104      | 665 530   | 1.37     | 0.5036895     | 2  | 0.93   | 0.72          | 1.20          | 1.12   | 0.81          | 1.55            |
| PBCS 1+2 | 5    | 0.421 0.447 | 767 1079 410/322 527 209     | 2256 1058 | 3.95     | 0.138529      | 2  | 1.15   | 0.97          | 1.36          | 1.21   | 0.98          | 1.50            |

Locus Alleles Chr Location Neighborhood  
rs11077820 T|C 17q25.1 71966263 UBE2O,AANAT

| SUBSET   | Rank | MAF         | Geno Counts                  | Subjects  | score X2 | score p-value | df | het OR | het OR 95% l | het OR 95% f | hom OR | hom OR 95% | hom OR 95% CI_u |
|----------|------|-------------|------------------------------|-----------|----------|---------------|----|--------|--------------|--------------|--------|------------|-----------------|
| STAGE1-3 | 11   | 0.374 0.367 | 3426 4157 1207/2093 2255 738 | 8790 5086 | 11.98    | 0.0025069     | 2  | 0.88   | 0.82         | 0.95         | 0.98   | 0.88       | 1.09            |
| NHS      | 17   | 0.382 0.374 | 429 553 159/329 353 125      | 1141 807  | 4.65     | 0.0979731     | 2  | 0.82   | 0.67         | 1.00         | 0.99   | 0.75       | 1.31            |
| STAGE1-2 | 6    | 0.383 0.368 | 1953 2611 714/1447 1549 517  | 5278 3513 | 24.21    | 0.000005523   | 2  | 0.80   | 0.73         | 0.88         | 0.95   | 0.84       | 1.09            |
| STAGE2   | 5    | 0.383 0.366 | 1524 2058 555/1118 1196 392  | 4137 2706 | 19.64    | 0.00005438    | 2  | 0.79   | 0.71         | 0.88         | 0.94   | 0.81       | 1.10            |
| CPSII    | 19   | 0.377 0.359 | 216 242 83/131 143 42        | 541 316   | 0.87     | 0.6478341     | 2  | 0.99   | 0.73         | 1.34         | 0.82   | 0.53       | 1.27            |
| PBCS1    | 12   | 0.375 0.334 | 193 244 67/160 150 43        | 504 353   | 3.23     | 0.1986905     | 2  | 0.77   | 0.57         | 1.03         | 0.79   | 0.51       | 1.23            |
| PLCO     | 11   | 0.371 0.354 | 371 484 120/188 200 58       | 975 446   | 2.79     | 0.2477566     | 2  | 0.81   | 0.64         | 1.04         | 0.89   | 0.62       | 1.28            |
| WHI      | 5    | 0.385 0.378 | 871 1215 320/694 776 270     | 2406 1740 | 14.12    | 0.0008569     | 2  | 0.80   | 0.70         | 0.92         | 1.06   | 0.87       | 1.28            |
| STAGE3   | 14   | 0.361 0.365 | 1473 1545 494/646 707 221    | 3512 1574 | 1.28     | 0.5273617     | 2  | 1.08   | 0.95         | 1.23         | 1.03   | 0.86       | 1.24            |
| NHS2     | 24   | 0.364 0.373 | 446 495 150/133 153 48       | 1091 334  | 0.16     | 0.9241262     | 2  | 1.04   | 0.80         | 1.36         | 1.07   | 0.73       | 1.57            |
| PBCS2    | 6    | 0.359 0.382 | 732 784 238/269 335 102      | 1754 706  | 2.67     | 0.2634574     | 2  | 1.16   | 0.96         | 1.40         | 1.18   | 0.90       | 1.55            |
| WHS      | 15   | 0.358 0.338 | 295 266 106/244 219 71       | 667 534   | 1.32     | 0.5166208     | 2  | 1.00   | 0.78         | 1.28         | 0.83   | 0.59       | 1.17            |
| PBCS 1+2 | 21   | 0.362 0.366 | 925 1029 304/429 484 145     | 2258 1058 | 0.08     | 0.9591668     | 2  | 1.01   | 0.86         | 1.18         | 1.03   | 0.82       | 1.30            |

Locus Alleles Chr Location Neighborhood  
rs12622050 G|A 2q11.2 100945886 NPAS2

| SUBSET   | Rank | MAF         | Geno Counts                 | Subjects  | score X2 | score p-value | df | het OR | het OR 95% l | het OR 95% f | hom OR | hom OR 95% | hom OR 95% CI_u |
|----------|------|-------------|-----------------------------|-----------|----------|---------------|----|--------|--------------|--------------|--------|------------|-----------------|
| STAGE1-3 | 12   | 0.225 0.209 | 5271 3090 432/3197 1647 236 | 8793 5080 | 11.86    | 0.002653      | 2  | 0.88   | 0.81         | 0.95         | 0.93   | 0.78       | 1.09            |
| NHS      | 16   | 0.220 0.189 | 694 392 55/529 251 27       | 1141 807  | 5.11     | 0.0776797     | 2  | 0.84   | 0.69         | 1.03         | 0.66   | 0.41       | 1.06            |
| STAGE1-2 | 13   | 0.220 0.200 | 3182 1875 227/2262 1101 152 | 5284 3515 | 16.47    | 0.0002649     | 2  | 0.83   | 0.75         | 0.91         | 0.95   | 0.76       | 1.17            |
| STAGE2   | 9    | 0.220 0.203 | 2488 1483 172/1733 850 125  | 4143 2708 | 14.43    | 0.0007365     | 2  | 0.82   | 0.74         | 0.91         | 1.04   | 0.82       | 1.32            |
| CPSII    | 1    | 0.217 0.213 | 323 203 16/201 94 20        | 542 315   | 10.19    | 0.0061334     | 2  | 0.72   | 0.53         | 0.97         | 1.98   | 0.99       | 3.94            |
| PBCS1    | 9    | 0.244 0.249 | 284 197 25/204 121 27       | 506 352   | 4.65     | 0.0979549     | 2  | 0.83   | 0.62         | 1.11         | 1.54   | 0.86       | 2.75            |
| PLCO     | 7    | 0.229 0.195 | 577 350 48/288 145 15       | 975 448   | 4.17     | 0.1242041     | 2  | 0.83   | 0.65         | 1.06         | 0.62   | 0.34       | 1.13            |
| WHI      | 11   | 0.213 0.194 | 1476 838 95/1138 530 73     | 2409 1741 | 8.80     | 0.012265      | 2  | 0.82   | 0.72         | 0.93         | 0.99   | 0.72       | 1.35            |
| STAGE3   | 20   | 0.232 0.228 | 2090 1217 205/936 547 83    | 3512 1566 | 0.44     | 0.8010732     | 2  | 0.99   | 0.87         | 1.12         | 1.01   | 0.70       | 1.20            |
| NHS2     | 13   | 0.200 0.216 | 712 332 53/202 112 15       | 1097 329  | 1.66     | 0.4359351     | 2  | 1.19   | 0.91         | 1.55         | 1.00   | 0.55       | 1.81            |
| PBCS2    | 18   | 0.252 0.245 | 980 644 117/402 254 45      | 1741 701  | 0.28     | 0.8702188     | 2  | 0.95   | 0.79         | 1.15         | 0.94   | 0.66       | 1.36            |
| WHS      | 13   | 0.231 0.212 | 398 241 35/332 181 23       | 674 536   | 1.37     | 0.5040364     | 2  | 0.90   | 0.70         | 1.14         | 0.78   | 0.45       | 1.34            |
| PBCS 1+2 | 16   | 0.250 0.247 | 1263 839 142/605 374 73     | 2244 1052 | 1.36     | 0.5065272     | 2  | 0.93   | 0.79         | 1.09         | 1.08   | 0.80       | 1.46            |

Locus Alleles Chr Location Neighborhood  
rs17570439 T|C 1p34.2 40096797 TRIT1

| SUBSET   | Rank | MAF         | Geno Counts                 | Subjects  | score X2 | score p-value | df | het OR | het OR 95% l | het OR 95% f | hom OR | hom OR 95% | hom OR 95% CI_u |
|----------|------|-------------|-----------------------------|-----------|----------|---------------|----|--------|--------------|--------------|--------|------------|-----------------|
| STAGE1-3 | 13   | 0.208 0.224 | 5507 2905 379/3076 1762 263 | 8791 5101 | 11.74    | 0.0028225     | 2  | 1.08   | 1.00         | 1.16         | 1.29   | 1.10       | 1.53            |
| NHS      | 3    | 0.204 0.245 | 718 381 42/457 304 46       | 1141 807  | 10.56    | 0.0050906     | 2  | 1.27   | 1.05         | 1.54         | 1.76   | 1.14       | 2.72            |
| STAGE1-2 | 8    | 0.208 0.229 | 3285 1798 201/2104 1217 196 | 5284 3517 | 20.92    | 0.0000286     | 2  | 1.06   | 0.97         | 1.16         | 1.56   | 1.27       | 1.92            |
| STAGE2   | 13   | 0.209 0.224 | 2567 1417 159/1647 913 150  | 4143 2710 | 12.16    | 0.0022935     | 2  | 1.01   | 0.91         | 1.12         | 1.51   | 1.19       | 1.91            |
| CPSII    | 9    | 0.196 0.201 | 343 187 13/203 99 14        | 543 316   | 3.53     | 0.1713941     | 2  | 0.89   | 0.66         | 1.21         | 1.89   | 0.86       | 4.18            |
| PBCS1    | 6    | 0.210 0.215 | 310 179 17/223 108 22       | 506 353   | 5.77     | 0.0559607     | 2  | 0.83   | 0.61         | 1.11         | 1.85   | 0.95       | 3.61            |
| PLCO     | 12   | 0.220 0.238 | 599 323 53/259 165 24       | 975 448   | 2.46     | 0.2918808     | 2  | 1.21   | 0.95         | 1.54         | 1.07   | 0.64       | 1.78            |
| WHI      | 8    | 0.206 0.225 | 1501 825 83/1053 594 95     | 2409 1742 | 9.96     | 0.0068861     | 2  | 1.03   | 0.90         | 1.17         | 1.63   | 1.20       | 2.21            |
| STAGE3   | 9    | 0.209 0.214 | 2222 1108 178/972 545 67    | 3508 1584 | 3.43     | 0.179634      | 2  | 1.11   | 0.97         | 1.26         | 0.89   | 0.66       | 1.19            |
| NHS2     | 5    | 0.208 0.229 | 694 332 60/194 119 16       | 1086 329  | 3.70     | 0.1570384     | 2  | 1.29   | 0.99         | 1.67         | 0.96   | 0.54       | 1.71            |
| PBCS2    | 23   | 0.208 0.210 | 1111 557 86/448 228 35      | 1754 711  | 0.01     | 0.9969135     | 2  | 1.01   | 0.83         | 1.22         | 0.99   | 0.66       | 1.49            |
| WHS      | 6    | 0.212 0.211 | 417 219 32/330 198 16       | 668 544   | 3.90     | 0.1425496     | 2  | 1.15   | 0.90         | 1.46         | 0.63   | 0.34       | 1.18            |
| PBCS 1+2 | 15   | 0.208 0.211 | 1421 735 103/671 336 57     | 2259 1064 | 1.39     | 0.5000978     | 2  | 0.96   | 0.82         | 1.13         | 1.18   | 0.84       | 1.66            |

Locus Alleles Chr Location Neighborhood  
rs17740709 A|G 12q21.31 81947471 TMTC2



| SUBSET   | Rank | MAF         | Geno Counts                 | Subjects  | score X2 | score p-value | df | het OR | het OR 95% l | het OR 95% t | hom OR | hom OR 95% | hom OR 95% CI_u |
|----------|------|-------------|-----------------------------|-----------|----------|---------------|----|--------|--------------|--------------|--------|------------|-----------------|
| STAGE1-3 | 14   | 0.219 0.220 | 5354 3028 417/3142 1658 292 | 8799 5092 | 11.45    | 0.0032619     | 2  | 0.94   | 0.87         | 1.01         | 1.23   | 1.05       | 1.44            |
| NHS      | 10   | 0.218 0.222 | 691 402 48/502 251 54       | 1141 807  | 8.28     | 0.0159561     | 2  | 0.87   | 0.71         | 1.05         | 1.25   | 1.05       | 2.37            |
| STAGE1-2 | 7    | 0.218 0.217 | 3200 1869 215/2194 1121 202 | 5284 3517 | 21.35    | 0.0000231     | 2  | 0.88   | 0.80         | 0.96         | 1.38   | 1.13       | 1.69            |
| STAGE2   | 10   | 0.217 0.215 | 2509 1467 167/1692 870 148  | 4143 2710 | 13.79    | 0.0010107     | 2  | 0.88   | 0.79         | 0.98         | 1.32   | 1.05       | 1.66            |
| CPSII    | 7    | 0.215 0.199 | 328 197 18/205 96 15        | 543 316   | 4.18     | 0.1235035     | 2  | 0.75   | 0.56         | 1.02         | 1.26   | 0.61       | 2.58            |
| PBCS1    | 14   | 0.242 0.245 | 282 203 21/203 127 23       | 506 353   | 2.91     | 0.2333108     | 2  | 0.89   | 0.66         | 1.18         | 1.52   | 0.81       | 2.85            |
| PLCO     | 22   | 0.214 0.218 | 603 326 46/277 147 24       | 975 448   | 0.11     | 0.9460943     | 2  | 0.99   | 0.78         | 1.27         | 1.09   | 0.64       | 1.84            |
| WHI      | 7    | 0.215 0.210 | 1466 851 92/1105 544 93     | 2409 1742 | 11.15    | 0.0037838     | 2  | 0.85   | 0.74         | 0.97         | 1.34   | 1.00       | 1.81            |
| STAGE3   | 15   | 0.222 0.228 | 2154 1160 202/948 539 90    | 3516 1577 | 1.14     | 0.5652783     | 2  | 1.07   | 0.94         | 1.22         | 1.06   | 0.81       | 1.38            |
| NHS2     | 23   | 0.210 0.212 | 694 349 56/207 109 16       | 1099 332  | 0.16     | 0.9223433     | 2  | 1.05   | 0.80         | 1.37         | 0.95   | 0.54       | 1.70            |
| PBCS2    | 5    | 0.234 0.254 | 1042 597 112/398 260 50     | 1751 708  | 2.73     | 0.255239      | 2  | 1.15   | 0.95         | 1.38         | 1.22   | 0.85       | 1.74            |
| WHS      | 22   | 0.212 0.203 | 418 214 34/343 170 24       | 666 537   | 0.24     | 0.8852347     | 2  | 0.97   | 0.76         | 1.24         | 0.88   | 0.51       | 1.51            |
| PBCS 1+2 | 12   | 0.236 0.251 | 1324 799 133/601 385 73     | 2256 1059 | 2.14     | 0.3436949     | 2  | 1.05   | 0.89         | 1.22         | 1.25   | 0.92       | 1.69            |

Locus rs37936 Alleles A|G Chr 7q21.11 Location Neighborhood 79806994

| SUBSET   | Rank | MAF         | Geno Counts                  | Subjects  | score X2 | score p-value | df | het OR | het OR 95% l | het OR 95% t | hom OR | hom OR 95% | hom OR 95% CI_u |
|----------|------|-------------|------------------------------|-----------|----------|---------------|----|--------|--------------|--------------|--------|------------|-----------------|
| STAGE1-3 | 15   | 0.384 0.367 | 3358 3974 1348/2015 2294 686 | 8680 4995 | 10.84    | 0.0044185     | 2  | 0.95   | 0.88         | 1.03         | 0.83   | 0.75       | 0.93            |
| NHS      | 9    | 0.399 0.362 | 403 541 177/333 343 115      | 1121 791  | 8.46     | 0.0145877     | 2  | 0.75   | 0.62         | 0.92         | 0.76   | 0.58       | 1.01            |
| STAGE1-2 | 5    | 0.400 0.362 | 1731 2149 796/1268 1397 418  | 4676 3083 | 25.08    | 0.000003587   | 2  | 0.88   | 0.79         | 0.97         | 0.70   | 0.61       | 0.81            |
| STAGE2   | 4    | 0.400 0.362 | 1328 1608 619/935 1054 303   | 3555 2292 | 20.93    | 0.00002857    | 2  | 0.92   | 0.82         | 1.03         | 0.69   | 0.58       | 0.81            |
| CPSII    | 16   | 0.387 0.355 | 199 251 79/131 139 41        | 529 311   | 1.50     | 0.4719206     | 2  | 0.85   | 0.63         | 1.15         | 0.80   | 0.52       | 1.25            |
| PLCO     | 21   | 0.378 0.372 | 379 431 146/181 186 69       | 956 436   | 0.66     | 0.7173457     | 2  | 0.90   | 0.70         | 1.16         | 0.97   | 0.69       | 1.36            |
| WHI      | 1    | 0.409 0.362 | 857 1064 430/680 800 212     | 2351 1692 | 25.12    | 0.000003512   | 2  | 0.95   | 0.83         | 1.09         | 0.62   | 0.51       | 0.75            |
| STAGE3   | 12   | 0.366 0.374 | 1434 1610 490/618 750 218    | 3534 1586 | 1.48     | 0.4773839     | 2  | 1.08   | 0.95         | 1.24         | 1.04   | 0.86       | 1.26            |
| NHS2     | 6    | 0.366 0.404 | 457 508 157/122 166 56       | 1122 344  | 3.27     | 0.1946363     | 2  | 1.22   | 0.94         | 1.59         | 1.34   | 0.93       | 1.92            |
| PBCS2    | 7    | 0.368 0.360 | 706 782 248/283 324 88       | 1736 695  | 1.70     | 0.4278026     | 2  | 1.05   | 0.87         | 1.27         | 0.87   | 0.66       | 1.16            |
| WHS      | 21   | 0.362 0.373 | 271 320 85/213 260 74        | 676 547   | 0.36     | 0.8355155     | 2  | 1.03   | 0.81         | 1.32         | 1.12   | 0.78       | 1.60            |
| PBCS 1+2 | 19   | 0.367 0.366 | 899 997 310/412 471 138      | 2206 1021 | 0.43     | 0.8084046     | 2  | 1.03   | 0.88         | 1.21         | 0.96   | 0.76       | 1.21            |

Locus rs3134615 Alleles G|T Chr 1p34.2 Location Neighborhood 40134653 TRIT1,MYCL1

| SUBSET   | Rank | MAF         | Geno Counts                 | Subjects  | score X2 | score p-value | df | het OR | het OR 95% l | het OR 95% t | hom OR | hom OR 95% | hom OR 95% CI_u |
|----------|------|-------------|-----------------------------|-----------|----------|---------------|----|--------|--------------|--------------|--------|------------|-----------------|
| STAGE1-3 | 16   | 0.227 0.243 | 5293 3091 463/2906 1906 288 | 8847 5100 | 10.33    | 0.00572       | 2  | 1.11   | 1.03         | 1.20         | 1.17   | 1.00       | 1.37            |
| NHS      | 4    | 0.220 0.262 | 689 402 50/433 325 49       | 1141 807  | 10.40    | 0.0055044     | 2  | 1.30   | 1.08         | 1.58         | 1.60   | 1.06       | 2.43            |
| STAGE1-2 | 20   | 0.228 0.248 | 3133 1895 256/1984 1323 210 | 5284 3517 | 10.95    | 0.0041946     | 2  | 1.11   | 1.01         | 1.21         | 1.32   | 1.09       | 1.61            |
| STAGE2   | 21   | 0.230 0.244 | 2444 1493 206/1551 998 161  | 4143 2710 | 4.53     | 0.1036742     | 2  | 1.05   | 0.95         | 1.17         | 1.25   | 1.01       | 1.56            |
| CPSII    | 8    | 0.215 0.222 | 326 200 17/193 106 17       | 543 316   | 3.79     | 0.1503889     | 2  | 0.89   | 0.66         | 1.20         | 1.80   | 0.89       | 3.66            |
| PBCS1    | 13   | 0.226 0.231 | 299 185 22/213 117 23       | 506 353   | 3.02     | 0.2205182     | 2  | 0.88   | 0.65         | 1.18         | 1.52   | 0.81       | 2.83            |
| PLCO     | 9    | 0.236 0.253 | 578 334 63/247 175 26       | 975 448   | 3.46     | 0.1775177     | 2  | 1.25   | 0.98         | 1.58         | 0.98   | 0.60       | 1.59            |
| WHI      | 17   | 0.229 0.247 | 1421 875 113/985 654 103    | 2409 1742 | 4.44     | 0.1084665     | 2  | 1.08   | 0.95         | 1.23         | 1.32   | 0.99       | 1.74            |
| STAGE3   | 6    | 0.226 0.234 | 2160 1196 207/922 585 79    | 3563 1586 | 4.05     | 0.1318465     | 2  | 1.12   | 0.99         | 1.28         | 0.92   | 0.70       | 1.21            |
| NHS2     | 9    | 0.228 0.241 | 687 372 72/190 124 18       | 1131 332  | 2.39     | 0.3023301     | 2  | 1.21   | 0.93         | 1.56         | 0.91   | 0.53       | 1.56            |
| PBCS2    | 21   | 0.226 0.225 | 1063 591 102/427 240 39     | 1756 706  | 0.13     | 0.9350661     | 2  | 1.00   | 0.83         | 1.21         | 0.93   | 0.63       | 1.37            |
| WHS      | 2    | 0.221 0.242 | 410 233 33/305 221 22       | 676 548   | 4.59     | 0.1006518     | 2  | 1.28   | 1.01         | 1.62         | 0.90   | 0.51       | 1.57            |
| PBCS 1+2 | 20   | 0.226 0.226 | 1362 776 124/640 355 61     | 2262 1056 | 0.38     | 0.8264424     | 2  | 0.97   | 0.82         | 1.13         | 1.06   | 0.77       | 1.47            |

Locus rs998592 Alleles G|A Chr 16p13.13 Location Neighborhood 11107179 CLEC16A

| SUBSET | Rank | MAF | Geno Counts | Subjects | score X2 | score p-value | df | het OR | het OR 95% l | het OR 95% t | hom OR | hom OR 95% | hom OR 95% CI_u |
|--------|------|-----|-------------|----------|----------|---------------|----|--------|--------------|--------------|--------|------------|-----------------|
|--------|------|-----|-------------|----------|----------|---------------|----|--------|--------------|--------------|--------|------------|-----------------|

|          |    |             |                              |           |       |           |   |      |      |      |      |      |      |
|----------|----|-------------|------------------------------|-----------|-------|-----------|---|------|------|------|------|------|------|
| STAGE1-3 | 17 | 0.425 0.417 | 2956 4239 1625 1696 2557 852 | 8820 5105 | 10.00 | 0.0067232 | 2 | 1.03 | 0.96 | 1.12 | 0.88 | 0.80 | 0.98 |
| NHS      | 5  | 0.424 0.429 | 405 502 232 253 415 139      | 1139 807  | 10.05 | 0.0065715 | 2 | 1.31 | 1.07 | 1.61 | 0.95 | 0.73 | 1.24 |
| STAGE1-2 | 14 | 0.436 0.424 | 1716 2524 1042 1133 1787 597 | 5282 3517 | 13.40 | 0.0012318 | 2 | 1.06 | 0.96 | 1.17 | 0.85 | 0.75 | 0.97 |
| STAGE2   | 19 | 0.440 0.422 | 1311 2022 810 880 1372 458   | 4143 2710 | 8.72  | 0.0127725 | 2 | 1.00 | 0.89 | 1.11 | 0.82 | 0.71 | 0.95 |
| CPSII    | 4  | 0.475 0.416 | 158 254 131 107 155 54       | 543 316   | 5.44  | 0.0658594 | 2 | 0.90 | 0.65 | 1.24 | 0.63 | 0.42 | 0.94 |
| PBCS1    | 8  | 0.415 0.368 | 186 220 100 141 164 48       | 506 353   | 4.82  | 0.0897233 | 2 | 0.94 | 0.69 | 1.27 | 0.64 | 0.42 | 0.96 |
| PLCO     | 13 | 0.419 0.393 | 324 485 166 162 220 66       | 975 448   | 2.03  | 0.3621779 | 2 | 0.89 | 0.69 | 1.15 | 0.78 | 0.55 | 1.11 |
| WHI      | 22 | 0.450 0.444 | 729 1192 488 517 903 322     | 2409 1742 | 2.91  | 0.2335718 | 2 | 1.07 | 0.93 | 1.23 | 0.93 | 0.78 | 1.11 |
| STAGE3   | 21 | 0.407 0.403 | 1240 1715 584 563 771 255    | 3539 1589 | 0.28  | 0.8708136 | 2 | 0.98 | 0.86 | 1.12 | 0.95 | 0.80 | 1.14 |
| NHS2     | 20 | 0.417 0.425 | 378 542 193 115 159 64       | 1113 338  | 0.47  | 0.7905375 | 2 | 0.96 | 0.73 | 1.27 | 1.08 | 0.76 | 1.54 |
| PBCS2    | 12 | 0.400 0.386 | 625 849 274 266 333 105      | 1748 704  | 1.03  | 0.5985685 | 2 | 0.92 | 0.76 | 1.11 | 0.89 | 0.68 | 1.17 |
| WHS      | 16 | 0.412 0.412 | 237 324 117 182 279 86       | 678 547   | 1.18  | 0.5552025 | 2 | 1.11 | 0.86 | 1.43 | 0.95 | 0.68 | 1.34 |
| PBCS 1+2 | 8  | 0.403 0.380 | 811 1069 373 407 496 153     | 2253 1056 | 3.63  | 0.1630679 | 2 | 0.93 | 0.79 | 1.09 | 0.80 | 0.64 | 1.01 |

Locus Alleles Chr Location Neighborhood  
rs10941679 A|G 5p12 44742255

| SUBSET   | Rank | MAF         | Geno Counts               | Subjects  | score X2 | score p-value | df | het OR | het OR 95% t | het OR 95% t | hom OR | hom OR 95% | hom OR 95% CI_u |
|----------|------|-------------|---------------------------|-----------|----------|---------------|----|--------|--------------|--------------|--------|------------|-----------------|
| STAGE1-3 | 18   | 0.259 0.282 | 2201 1519 277 978 787 146 | 3997 1911 | 7.82     | 0.0200736     | 2  | 1.17   | 1.04         | 1.32         | 1.18   | 0.95       | 1.46            |
| STAGE3   | 2    | 0.259 0.278 | 1945 1325 250 817 646 116 | 3520 1579 | 6.40     | 0.0408197     | 2  | 1.18   | 1.04         | 1.34         | 1.11   | 0.87       | 1.41            |
| NHS2     | 10   | 0.256 0.285 | 607 415 73 173 133 29     | 1095 335  | 2.31     | 0.3143273     | 2  | 1.12   | 0.87         | 1.46         | 1.21   | 0.88       | 2.21            |
| PBCS2    | 2    | 0.259 0.288 | 969 667 121 350 308 50    | 1757 708  | 6.92     | 0.0314154     | 2  | 1.28   | 1.06         | 1.53         | 1.17   | 0.82       | 1.66            |
| WHS      | 17   | 0.266 0.260 | 369 243 56 294 205 37     | 668 536   | 1.11     | 0.5730079     | 2  | 1.06   | 0.84         | 1.35         | 0.84   | 0.54       | 1.30            |
| PBCS 1+2 | 2    | 0.259 0.293 | 1225 861 148 511 449 80   | 2234 1040 | 8.43     | 0.0147405     | 2  | 1.24   | 1.06         | 1.45         | 1.28   | 0.96       | 1.72            |

Locus Alleles Chr Location Neighborhood  
rs3817198 T|C 11p15.5 1865582 LSP1

| SUBSET   | Rank | MAF         | Geno Counts                 | Subjects  | score X2 | score p-value | df | het OR | het OR 95% t | het OR 95% t | hom OR | hom OR 95% | hom OR 95% CI_u |
|----------|------|-------------|-----------------------------|-----------|----------|---------------|----|--------|--------------|--------------|--------|------------|-----------------|
| STAGE1-3 | 19   | 0.324 0.335 | 4021 3887 916 2294 2211 606 | 8824 5111 | 7.24     | 0.0268108     | 2  | 1.00   | 0.93         | 1.08         | 1.16   | 1.04       | 1.31            |
| NHS      | 18   | 0.318 0.328 | 524 509 108 373 339 95      | 1141 807  | 2.97     | 0.2267303     | 2  | 0.93   | 0.77         | 1.13         | 1.22   | 0.90       | 1.66            |
| STAGE1-2 | 23   | 0.325 0.337 | 2407 2311 562 1564 1530 419 | 5280 3513 | 3.35     | 0.1868786     | 2  | 1.02   | 0.93         | 1.12         | 1.14   | 0.99       | 1.32            |
| STAGE2   | 23   | 0.327 0.340 | 1883 1802 454 1191 1191 324 | 4139 2706 | 2.11     | 0.3481057     | 2  | 1.05   | 0.94         | 1.16         | 1.12   | 0.95       | 1.32            |
| CPSII    | 22   | 0.334 0.340 | 243 231 64 139 138 38       | 538 315   | 0.14     | 0.9332502     | 2  | 1.04   | 0.77         | 1.41         | 1.08   | 0.68       | 1.71            |
| PBCS1    | 20   | 0.319 0.326 | 229 228 47 161 150 39       | 504 350   | 0.98     | 0.6120757     | 2  | 0.91   | 0.68         | 1.22         | 1.14   | 0.71       | 1.84            |
| PLCO     | 6    | 0.335 0.334 | 440 417 118 190 215 42      | 975 447   | 5.33     | 0.0695377     | 2  | 1.18   | 0.93         | 1.50         | 0.76   | 0.51       | 1.13            |
| WHI      | 18   | 0.326 0.343 | 1097 1051 260 768 753 221   | 2408 1742 | 4.18     | 0.1239027     | 2  | 1.03   | 0.90         | 1.17         | 1.23   | 1.01       | 1.51            |
| STAGE3   | 5    | 0.322 0.331 | 1613 1577 354 727 682 187   | 3544 1596 | 4.39     | 0.1112683     | 2  | 0.95   | 0.84         | 1.08         | 1.19   | 0.97       | 1.45            |
| NHS2     | 17   | 0.317 0.324 | 518 491 109 160 145 39      | 1118 344  | 0.82     | 0.6635111     | 2  | 0.96   | 0.74         | 1.24         | 1.16   | 0.77       | 1.74            |
| PBCS2    | 9    | 0.330 0.330 | 789 789 189 326 301 84      | 1767 711  | 1.40     | 0.4962023     | 2  | 0.92   | 0.76         | 1.11         | 1.08   | 0.81       | 1.44            |
| WHS      | 7    | 0.310 0.336 | 306 297 56 241 236 64       | 659 541   | 3.51     | 0.1732773     | 2  | 1.01   | 0.79         | 1.28         | 1.44   | 0.97       | 2.14            |
| PBCS 1+2 | 11   | 0.328 0.327 | 1019 1016 236 490 450 123   | 2271 1063 | 2.22     | 0.3288087     | 2  | 0.92   | 0.79         | 1.08         | 1.10   | 0.86       | 1.40            |

Locus Alleles Chr Location Neighborhood  
rs1274466 T|C 10p11.21 34510210 PARD3

| SUBSET   | Rank | MAF         | Geno Counts                  | Subjects  | score X2 | score p-value | df | het OR | het OR 95% t | het OR 95% t | hom OR | hom OR 95% | hom OR 95% CI_u |
|----------|------|-------------|------------------------------|-----------|----------|---------------|----|--------|--------------|--------------|--------|------------|-----------------|
| STAGE1-3 | 20   | 0.451 0.434 | 2683 4344 1810 1648 2482 973 | 8837 5103 | 7.23     | 0.0269016     | 2  | 0.93   | 0.86         | 1.00         | 0.88   | 0.79       | 0.97            |
| NHS      | 15   | 0.470 0.436 | 312 585 244 261 388 158      | 1141 807  | 5.56     | 0.0620887     | 2  | 0.79   | 0.64         | 0.98         | 0.78   | 0.60       | 1.01            |
| STAGE1-2 | 19   | 0.454 0.429 | 1574 2618 1092 1164 1687 665 | 5284 3516 | 11.95    | 0.0025446     | 2  | 0.87   | 0.79         | 0.96         | 0.82   | 0.73       | 0.93            |
| STAGE2   | 20   | 0.450 0.427 | 1262 2033 848 903 1299 507   | 4143 2709 | 7.37     | 0.0250861     | 2  | 0.89   | 0.80         | 1.00         | 0.83   | 0.72       | 0.96            |
| CPSII    | 14   | 0.471 0.440 | 152 271 120 101 152 63       | 543 316   | 1.76     | 0.4139121     | 2  | 0.83   | 0.60         | 1.15         | 0.78   | 0.53       | 1.17            |
| PBCS1    | 21   | 0.483 0.457 | 138 247 121 104 174 74       | 506 352   | 0.59     | 0.7456094     | 2  | 0.98   | 0.71         | 1.36         | 0.87   | 0.59       | 1.28            |
| PLCO     | 1    | 0.449 0.391 | 298 478 199 167 212 69       | 975 448   | 8.35     | 0.0154007     | 2  | 0.78   | 0.61         | 1.01         | 0.62   | 0.44       | 0.87            |

|          |    |             |                           |           |      |           |   |      |      |      |      |      |      |
|----------|----|-------------|---------------------------|-----------|------|-----------|---|------|------|------|------|------|------|
| WHI      | 23 | 0.443 0.428 | 755 1175 479/579 835 328  | 2409 1742 | 1.97 | 0.373328  | 2 | 0.93 | 0.80 | 1.06 | 0.89 | 0.74 | 1.06 |
| STAGE3   | 17 | 0.445 0.445 | 1109 1730 719/484 795 309 | 3558 1588 | 0.78 | 0.678235  | 2 | 1.05 | 0.92 | 1.21 | 0.99 | 0.83 | 1.18 |
| NHS2     | 18 | 0.440 0.432 | 363 535 227/106 166 61    | 1125 333  | 0.68 | 0.7125768 | 2 | 1.05 | 0.80 | 1.39 | 0.92 | 0.64 | 1.31 |
| PBCS2    | 16 | 0.457 0.451 | 518 863 368/211 357 141   | 1749 709  | 0.57 | 0.7510604 | 2 | 1.01 | 0.83 | 1.24 | 0.93 | 0.72 | 1.20 |
| WHS      | 14 | 0.424 0.445 | 228 332 124/167 272 107   | 684 546   | 1.35 | 0.5097867 | 2 | 1.11 | 0.86 | 1.44 | 1.21 | 0.87 | 1.67 |
| PBCS 1+2 | 14 | 0.463 0.452 | 656 1106 488/315 531 214  | 2250 1060 | 1.41 | 0.4950597 | 2 | 0.99 | 0.84 | 1.18 | 0.89 | 0.72 | 1.10 |

Locus Alleles Chr Location Neighborhood  
rs7936636 C|T 11p11.2 44397546

| SUBSET   | Rank | MAF         | Geno Counts                 | Subjects  | score X2 | score p-value | df | het OR | het OR 95% CI | het OR 95% CI | hom OR | hom OR 95% CI | hom OR 95% CI_u |
|----------|------|-------------|-----------------------------|-----------|----------|---------------|----|--------|---------------|---------------|--------|---------------|-----------------|
| STAGE1-3 | 21   | 0.258 0.250 | 4826 3425 560/2885 1879 337 | 8811 5101 | 6.57     | 0.0375011     | 2  | 0.91   | 0.85          | 0.98          | 1.01   | 0.88          | 1.17            |
| NHS      | 19   | 0.256 0.247 | 634 430 77/470 276 61       | 1141 807  | 2.75     | 0.252558      | 2  | 0.86   | 0.71          | 1.04          | 1.06   | 0.74          | 1.52            |
| STAGE1-2 | 16   | 0.263 0.247 | 2851 2086 344/2020 1258 238 | 5281 3516 | 12.69    | 0.0017539     | 2  | 0.85   | 0.78          | 0.93          | 0.98   | 0.82          | 1.17            |
| STAGE2   | 16   | 0.264 0.247 | 2217 1656 267/1550 982 177  | 4140 2709 | 10.17    | 0.0062026     | 2  | 0.85   | 0.76          | 0.94          | 0.96   | 0.78          | 1.17            |
| CPSII    | 2    | 0.266 0.222 | 286 224 32/197 98 21        | 542 316   | 9.11     | 0.0104966     | 2  | 0.63   | 0.47          | 0.85          | 0.92   | 0.51          | 1.66            |
| PBCS1    | 16   | 0.247 0.229 | 284 193 28/212 119 21       | 505 352   | 1.81     | 0.4049353     | 2  | 0.82   | 0.61          | 1.10          | 1.03   | 0.56          | 1.89            |
| PLCO     | 15   | 0.263 0.253 | 526 385 64/254 161 33       | 975 448   | 1.98     | 0.3719405     | 2  | 0.85   | 0.67          | 1.08          | 1.06   | 0.67          | 1.66            |
| WHI      | 15   | 0.270 0.249 | 1272 973 163/983 649 110    | 2408 1742 | 5.06     | 0.0797501     | 2  | 0.87   | 0.76          | 0.99          | 0.88   | 0.68          | 1.13            |
| STAGE3   | 18   | 0.251 0.258 | 1975 1339 216/865 621 98    | 3530 1584 | 0.72     | 0.6982153     | 2  | 1.05   | 0.92          | 1.19          | 1.08   | 0.83          | 1.39            |
| NHS2     | 7    | 0.266 0.239 | 598 438 77/198 117 22       | 1113 337  | 2.75     | 0.2527845     | 2  | 0.81   | 0.62          | 1.04          | 0.86   | 0.52          | 1.42            |
| PBCS2    | 4    | 0.245 0.268 | 993 643 105/372 282 47      | 1741 701  | 2.81     | 0.2453943     | 2  | 1.16   | 0.96          | 1.39          | 1.20   | 0.83          | 1.72            |
| WHS      | 18   | 0.241 0.256 | 384 258 34/295 222 29       | 676 546   | 0.91     | 0.6331963     | 2  | 1.12   | 0.88          | 1.41          | 1.11   | 0.66          | 1.87            |
| PBCS 1+2 | 18   | 0.245 0.256 | 1277 836 133/584 401 69     | 2246 1054 | 0.95     | 0.6205492     | 2  | 1.04   | 0.89          | 1.22          | 1.15   | 0.85          | 1.57            |

Locus Alleles Chr Location Neighborhood  
rs724244 C|T 3p24.1 27217157 NEK10

| SUBSET   | Rank | MAF         | Geno Counts                 | Subjects  | score X2 | score p-value | df | het OR | het OR 95% CI | het OR 95% CI | hom OR | hom OR 95% CI | hom OR 95% CI_u |
|----------|------|-------------|-----------------------------|-----------|----------|---------------|----|--------|---------------|---------------|--------|---------------|-----------------|
| STAGE1-3 | 22   | 0.261 0.273 | 4211 2933 535/2281 1695 328 | 7679 4304 | 4.70     | 0.0952238     | 2  | 1.07   | 0.98          | 1.15          | 1.15   | 0.99          | 1.33            |
| STAGE1-2 | 21   | 0.252 0.275 | 2304 1588 250/1429 1071 209 | 4142 2709 | 9.52     | 0.0085773     | 2  | 1.09   | 0.98          | 1.21          | 1.34   | 1.10          | 1.63            |
| STAGE2   | 18   | 0.252 0.275 | 2304 1588 250/1429 1071 209 | 4142 2709 | 9.44     | 0.0089134     | 2  | 1.09   | 0.98          | 1.21          | 1.34   | 1.10          | 1.63            |
| CPSII    | 20   | 0.247 0.266 | 309 198 35/173 118 25       | 542 316   | 0.77     | 0.6805392     | 2  | 1.11   | 0.83          | 1.50          | 1.21   | 0.69          | 2.09            |
| PBCS1    | 17   | 0.246 0.265 | 293 177 36/198 123 32       | 506 353   | 1.46     | 0.4830701     | 2  | 1.05   | 0.78          | 1.41          | 1.37   | 0.82          | 2.31            |
| PLCO     | 4    | 0.230 0.271 | 569 364 42/235 182 30       | 975 447   | 5.72     | 0.0573307     | 2  | 1.22   | 0.97          | 1.55          | 1.68   | 1.01          | 2.77            |
| WHI      | 21   | 0.263 0.280 | 1302 949 158/901 708 133    | 2409 1742 | 3.24     | 0.1976143     | 2  | 1.08   | 0.95          | 1.23          | 1.23   | 0.96          | 1.57            |
| STAGE3   | 16   | 0.271 0.270 | 1907 1349 285/852 624 119   | 3541 1595 | 0.86     | 0.6493833     | 2  | 1.04   | 0.92          | 1.18          | 0.94   | 0.74          | 1.19            |
| NHS2     | 15   | 0.269 0.281 | 611 397 100/176 134 28      | 1108 338  | 1.61     | 0.4461014     | 2  | 1.17   | 0.90          | 1.52          | 0.97   | 0.62          | 1.53            |
| PBCS2    | 17   | 0.273 0.265 | 926 696 131/381 280 48      | 1753 709  | 0.50     | 0.779063      | 2  | 0.98   | 0.82          | 1.18          | 0.88   | 0.62          | 1.25            |
| WHS      | 23   | 0.268 0.270 | 370 256 54/295 210 43       | 680 548   | 0.07     | 0.9678248     | 2  | 1.03   | 0.81          | 1.31          | 1.02   | 0.67          | 1.57            |
| PBCS 1+2 | 23   | 0.267 0.265 | 1219 869 167/579 403 80     | 2255 1062 | 0.01     | 0.9974029     | 2  | 1.00   | 0.85          | 1.16          | 1.00   | 0.75          | 1.34            |

Locus Alleles Chr Location Neighborhood  
rs2391406 T|G 13q33.3 106586873

| SUBSET   | Rank | MAF         | Geno Counts                  | Subjects  | score X2 | score p-value | df | het OR | het OR 95% CI | het OR 95% CI | hom OR | hom OR 95% CI | hom OR 95% CI_u |
|----------|------|-------------|------------------------------|-----------|----------|---------------|----|--------|---------------|---------------|--------|---------------|-----------------|
| STAGE1-3 | 23   | 0.372 0.367 | 3513 4015 1265/2027 2376 676 | 8793 5079 | 3.07     | 0.2157086     | 2  | 1.02   | 0.95          | 1.10          | 0.93   | 0.83          | 1.04            |
| NHS      | 20   | 0.371 0.366 | 452 529 159/323 377 107      | 1140 807  | 0.26     | 0.879983      | 2  | 1.02   | 0.84          | 1.24          | 0.95   | 0.71          | 1.26            |
| STAGE1-2 | 18   | 0.375 0.364 | 2110 2378 788/1393 1684 438  | 5276 3515 | 11.95    | 0.0025414     | 2  | 1.07   | 0.97          | 1.17          | 0.84   | 0.74          | 0.97            |
| STAGE2   | 11   | 0.376 0.364 | 1658 1849 629/1070 1307 331  | 4136 2708 | 13.26    | 0.0013179     | 2  | 1.08   | 0.97          | 1.20          | 0.82   | 0.70          | 0.95            |
| CPSII    | 5    | 0.371 0.339 | 217 240 79/132 150 31        | 536 313   | 4.63     | 0.0989282     | 2  | 1.02   | 0.76          | 1.38          | 0.62   | 0.39          | 1.00            |
| PBCS1    | 2    | 0.387 0.375 | 195 230 81/125 190 37        | 506 352   | 7.84     | 0.0198724     | 2  | 1.28   | 0.95          | 1.73          | 0.71   | 0.45          | 1.12            |
| PLCO     | 8    | 0.376 0.360 | 398 416 157/180 213 55       | 971 448   | 3.85     | 0.1461524     | 2  | 1.09   | 0.85          | 1.39          | 0.77   | 0.54          | 1.10            |
| WHI      | 19   | 0.372 0.365 | 971 1084 353/693 828 221     | 2408 1742 | 4.11     | 0.1281107     | 2  | 1.07   | 0.93          | 1.22          | 0.88   | 0.72          | 1.07            |

|          |    |             |                           |           |      |           |   |      |      |      |      |      |      |
|----------|----|-------------|---------------------------|-----------|------|-----------|---|------|------|------|------|------|------|
| STAGE3   | 8  | 0.369 0.373 | 1403 1641 477 634 693 238 | 3521 1565 | 3.84 | 0.1463487 | 2 | 0.93 | 0.82 | 1.06 | 1.11 | 0.92 | 1.34 |
| NHS2     | 2  | 0.341 0.392 | 493 477 140 129 154 56    | 1110 339  | 6.02 | 0.0492348 | 2 | 1.24 | 0.95 | 1.62 | 1.55 | 1.07 | 2.23 |
| PBCS2    | 3  | 0.380 0.381 | 656 853 236 275 321 108   | 1745 704  | 3.26 | 0.1963425 | 2 | 0.89 | 0.73 | 1.08 | 1.11 | 0.85 | 1.46 |
| WHS      | 3  | 0.385 0.351 | 254 311 101 230 218 74    | 666 522   | 4.14 | 0.1259678 | 2 | 0.78 | 0.61 | 1.00 | 0.81 | 0.57 | 1.16 |
| PBCS 1+2 | 22 | 0.381 0.379 | 851 1079 317 400 510 145  | 2247 1055 | 0.03 | 0.9859684 | 2 | 1.00 | 0.85 | 1.18 | 0.98 | 0.78 | 1.24 |

Locus Alleles Chr Location Neighborhood  
rs4666451 G|A 2p24.1 19150424

| SUBSET   | Rank | MAF         | Geno Counts                  | Subjects  | score X2 | score p-value | df | het OR | het OR 95% CI | het OR 95% CI | hom OR | hom OR 95% CI | hom OR 95% CI_u |
|----------|------|-------------|------------------------------|-----------|----------|---------------|----|--------|---------------|---------------|--------|---------------|-----------------|
| STAGE1-3 | 24   | 0.395 0.385 | 2822 3643 1205 1621 2044 634 | 7670 4299 | 2.32     | 0.314065      | 2  | 0.97   | 0.90          | 1.06          | 0.91   | 0.81          | 1.03            |
| STAGE1-2 | 22   | 0.398 0.383 | 1509 1968 666 1028 1286 396  | 4143 2710 | 3.38     | 0.1846378     | 2  | 0.95   | 0.86          | 1.06          | 0.87   | 0.75          | 1.01            |
| STAGE2   | 22   | 0.398 0.383 | 1509 1968 666 1028 1286 396  | 4143 2710 | 3.40     | 0.1824638     | 2  | 0.95   | 0.86          | 1.06          | 0.87   | 0.75          | 1.01            |
| CPSII    | 3    | 0.394 0.413 | 201 256 86 96 179 41         | 543 316   | 6.50     | 0.0387617     | 2  | 1.43   | 1.05          | 1.95          | 0.97   | 0.62          | 1.52            |
| PBCS1    | 15   | 0.409 0.375 | 176 246 84 140 161 52        | 506 353   | 2.75     | 0.2522101     | 2  | 0.78   | 0.58          | 1.06          | 0.79   | 0.52          | 1.20            |
| PLCO     | 14   | 0.393 0.394 | 355 474 146 170 203 75       | 975 448   | 2.01     | 0.3665339     | 2  | 0.87   | 0.68          | 1.11          | 1.06   | 0.76          | 1.49            |
| WHI      | 20   | 0.397 0.378 | 890 1125 394 672 822 248     | 2409 1742 | 3.74     | 0.1542724     | 2  | 0.97   | 0.85          | 1.11          | 0.83   | 0.69          | 1.01            |
| STAGE3   | 24   | 0.390 0.388 | 1315 1676 539 593 760 238    | 3530 1591 | 0.10     | 0.9517818     | 2  | 1.01   | 0.89          | 1.15          | 0.98   | 0.82          | 1.18            |
| NHS2     | 8    | 0.382 0.370 | 428 504 169 128 165 41       | 1101 334  | 2.46     | 0.2921723     | 2  | 1.10   | 0.84          | 1.43          | 0.81   | 0.55          | 1.20            |
| PBCS2    | 8    | 0.399 0.398 | 621 858 268 263 330 118      | 1747 711  | 1.41     | 0.4947083     | 2  | 0.91   | 0.75          | 1.11          | 1.04   | 0.80          | 1.35            |
| WHS      | 19   | 0.380 0.387 | 266 314 102 202 265 79       | 682 546   | 0.68     | 0.7127003     | 2  | 1.11   | 0.87          | 1.42          | 1.03   | 0.73          | 1.46            |
| PBCS 1+2 | 9    | 0.402 0.390 | 795 1103 352 403 489 170     | 2250 1062 | 2.69     | 0.2607758     | 2  | 0.88   | 0.74          | 1.03          | 0.96   | 0.77          | 1.19            |

adj\_trend

Locus Alleles Chr Location Neighborhood  
rs11249433 T|C 1p11.2 120982136 LOC647121

| SUBSET   | Rank | MAF         | Geno Counts                  | Subjects  | score X2 | score p-value | df | het OR | het OR 95% CI | het OR 95% CI | hom OR | hom OR 95% CI | hom OR 95% CI_u |
|----------|------|-------------|------------------------------|-----------|----------|---------------|----|--------|---------------|---------------|--------|---------------|-----------------|
| STAGE1-3 | 1    | 0.395 0.441 | 3255 4114 1412 1590 2476 993 | 8781 5059 | 49.27    | 2.229E-12     | 1  | 1.20   | 1.14          | 1.26          | 1.43   | 1.29          | 1.58            |
| NHS      | 1    | 0.388 0.448 | 425 540 170 238 411 155      | 1135 804  | 14.24    | 0.0001609     | 1  | 1.29   | 1.13          | 1.47          | 1.66   | 1.27          | 2.16            |
| STAGE1-2 | 1    | 0.403 0.443 | 1899 2491 874 1070 1756 674  | 5264 3500 | 28.98    | 7.317E-08     | 1  | 1.18   | 1.11          | 1.26          | 1.40   | 1.24          | 1.59            |
| STAGE2   | 2    | 0.407 0.442 | 1474 1951 704 832 1345 519   | 4129 2696 | 16.80    | 0.00004162    | 1  | 1.16   | 1.08          | 1.24          | 1.34   | 1.16          | 1.54            |
| CPSII    | 10   | 0.378 0.405 | 220 235 88 108 159 48        | 543 315   | 0.82     | 0.3664292     | 1  | 1.10   | 0.90          | 1.34          | 1.20   | 0.81          | 1.79            |
| PBCS1    | 14   | 0.387 0.407 | 195 230 81 124 171 58        | 506 353   | 0.51     | 0.4764589     | 1  | 1.07   | 0.88          | 1.31          | 1.15   | 0.78          | 1.71            |
| PLCO     | 17   | 0.420 0.427 | 324 476 169 140 232 75       | 969 447   | 0.22     | 0.6388939     | 1  | 1.04   | 0.88          | 1.23          | 1.08   | 0.78          | 1.50            |
| WHI      | 1    | 0.407 0.455 | 857 1133 411 514 857 359     | 2401 1730 | 19.12    | 0.00001228    | 1  | 1.22   | 1.11          | 1.33          | 1.48   | 1.24          | 1.77            |
| STAGE3   | 1    | 0.383 0.436 | 1360 1625 538 520 720 319    | 3523 1559 | 18.94    | 0.00001348    | 1  | 1.21   | 1.11          | 1.32          | 1.46   | 1.23          | 1.74            |
| NHS2     | 2    | 0.395 0.446 | 418 522 182 107 147 72       | 1122 326  | 5.35     | 0.0207293     | 1  | 1.23   | 1.03          | 1.46          | 1.50   | 1.06          | 2.12            |
| PBCS2    | 1    | 0.362 0.410 | 719 778 240 246 324 121      | 1737 691  | 9.23     | 0.0023815     | 1  | 1.22   | 1.07          | 1.38          | 1.48   | 1.15          | 1.91            |
| WHS      | 1    | 0.419 0.462 | 223 325 116 167 249 126      | 664 542   | 4.40     | 0.0358692     | 1  | 1.19   | 1.01          | 1.39          | 1.41   | 1.02          | 1.94            |
| PBCS 1+2 | 1    | 0.368 0.409 | 910 1006 321 370 495 179     | 2237 1044 | 8.53     | 0.0035025     | 1  | 1.17   | 1.05          | 1.30          | 1.37   | 1.11          | 1.69            |

Locus Alleles Chr Location Neighborhood  
rs7716600 C|A 5p12 44910762

| SUBSET   | Rank | MAF         | Geno Counts                 | Subjects  | score X2 | score p-value | df | het OR | het OR 95% CI | het OR 95% CI | hom OR | hom OR 95% CI | hom OR 95% CI_u |
|----------|------|-------------|-----------------------------|-----------|----------|---------------|----|--------|---------------|---------------|--------|---------------|-----------------|
| STAGE1-3 | 2    | 0.220 0.243 | 5382 3016 434 2950 1835 322 | 8832 5107 | 18.05    | 0.00002153    | 1  | 1.13   | 1.07          | 1.20          | 1.29   | 1.15          | 1.44            |
| NHS      | 5    | 0.215 0.253 | 693 401 44 451 303 53       | 1138 807  | 7.85     | 0.0050801     | 1  | 1.24   | 1.07          | 1.45          | 1.55   | 1.14          | 2.10            |
| STAGE1-2 | 2    | 0.216 0.248 | 3227 1822 226 2015 1256 243 | 5275 3514 | 24.06    | 0.000000933   | 1  | 1.20   | 1.11          | 1.29          | 1.43   | 1.24          | 1.65            |
| STAGE2   | 3    | 0.216 0.246 | 2534 1421 182 1564 953 190  | 4137 2707 | 16.52    | 0.0000481     | 1  | 1.18   | 1.09          | 1.28          | 1.40   | 1.19          | 1.65            |
| CPSII    | 16   | 0.225 0.241 | 325 192 26 186 108 22       | 543 316   | 0.28     | 0.5994387     | 1  | 1.06   | 0.84          | 1.34          | 1.13   | 0.71          | 1.80            |
| PBCS1    | 2    | 0.217 0.272 | 308 173 23 186 139 26       | 504 351   | 6.02     | 0.0141666     | 1  | 1.33   | 1.06          | 1.67          | 1.77   | 1.12          | 2.80            |
| PLCO     | 15   | 0.223 0.232 | 577 359 37 261 166 21       | 973 448   | 0.42     | 5.18E-01      | 1  | 1.06   | 0.87          | 1.29          | 1.13   | 0.76          | 1.67            |
| WHI      | 3    | 0.212 0.248 | 1499 797 111 1010 600 131   | 2407 1741 | 14.39    | 0.0001488     | 1  | 1.22   | 1.10          | 1.35          | 1.48   | 1.21          | 1.82            |

|          |    |             |                          |           |      |           |   |      |      |      |      |      |      |
|----------|----|-------------|--------------------------|-----------|------|-----------|---|------|------|------|------|------|------|
| STAGE3   | 17 | 0.226 0.231 | 2155 1196 208 936 581 78 | 3559 1595 | 0.29 | 0.5898268 | 1 | 1.03 | 0.93 | 1.14 | 1.06 | 0.86 | 1.29 |
| NHS2     | 23 | 0.229 0.230 | 676 383 66 198 126 15    | 1125 339  | 0.00 | 0.9472513 | 1 | 1.01 | 0.82 | 1.23 | 1.01 | 0.68 | 1.52 |
| PBCS2    | 10 | 0.223 0.233 | 1070 586 98 417 254 38   | 1754 709  | 0.64 | 0.4234571 | 1 | 1.06 | 0.92 | 1.23 | 1.13 | 0.84 | 1.51 |
| WHS      | 22 | 0.232 0.229 | 409 227 44 321 201 25    | 680 547   | 0.01 | 0.9260212 | 1 | 0.99 | 0.82 | 1.20 | 0.98 | 0.67 | 1.43 |
| PBCS 1+2 | 3  | 0.221 0.246 | 1378 757 121 602 391 65  | 2256 1058 | 4.29 | 0.0382396 | 1 | 1.14 | 1.01 | 1.28 | 1.29 | 1.01 | 1.65 |

Locus Alleles Chr Location Neighborhood  
rs999737 C|T 14q24.1 68104435 RAD51L1

| SUBSET   | Rank | MAF         | Geno Counts                 | Subjects  | score X2 | score p-value | df | het OR | het OR 95% CI | het OR 95% CI | hom OR | hom OR 95% CI | hom OR 95% CI_u |
|----------|------|-------------|-----------------------------|-----------|----------|---------------|----|--------|---------------|---------------|--------|---------------|-----------------|
| STAGE1-3 | 3    | 0.238 0.215 | 5166 3096 548 3130 1743 227 | 8810 5100 | 16.75    | 0.00004275    | 1  | 0.88   | 0.83          | 0.94          | 0.78   | 0.69          | 0.88            |
| NHS      | 7    | 0.244 0.209 | 660 405 76 499 278 30       | 1141 807  | 6.28     | 0.0122422     | 1  | 0.82   | 0.70          | 0.96          | 0.67   | 0.50          | 0.92            |
| STAGE1-2 | 7    | 0.239 0.211 | 3092 1862 330 2185 1182 150 | 5284 3517 | 17.59    | 0.00002736    | 1  | 0.86   | 0.80          | 0.92          | 0.73   | 0.63          | 0.85            |
| STAGE2   | 7    | 0.237 0.211 | 2432 1457 254 1686 904 120  | 4143 2710 | 11.78    | 0.0005999     | 1  | 0.86   | 0.80          | 0.94          | 0.75   | 0.63          | 0.88            |
| CPSII    | 15   | 0.235 0.223 | 319 193 31 193 105 18       | 543 316   | 0.29     | 0.5877089     | 1  | 0.94   | 0.74          | 1.18          | 0.88   | 0.55          | 1.40            |
| PBCS1    | 4    | 0.242 0.203 | 291 185 30 219 125 9        | 506 353   | 4.13     | 0.0422054     | 1  | 0.78   | 0.61          | 0.99          | 0.61   | 0.37          | 0.98            |
| PLCO     | 16   | 0.238 0.225 | 576 334 65 262 170 16       | 975 448   | 0.41     | 0.5215631     | 1  | 0.94   | 0.78          | 1.14          | 0.88   | 0.60          | 1.29            |
| WHI      | 6    | 0.235 0.208 | 1416 854 139 1100 559 83    | 2409 1742 | 8.34     | 0.0038806     | 1  | 0.86   | 0.77          | 0.95          | 0.73   | 0.59          | 0.91            |
| STAGE3   | 6    | 0.237 0.226 | 2075 1237 218 946 562 77    | 3530 1585 | 1.36     | 0.243497      | 1  | 0.94   | 0.85          | 1.04          | 0.89   | 0.73          | 1.09            |
| NHS2     | 24   | 0.234 0.233 | 664 362 77 198 115 20       | 1103 333  | 0.00     | 0.9874734     | 1  | 1.00   | 0.82          | 1.22          | 1.00   | 0.67          | 1.48            |
| PBCS2    | 11   | 0.236 0.224 | 1016 637 94 422 248 34      | 1747 704  | 0.61     | 0.4330622     | 1  | 0.94   | 0.81          | 1.09          | 0.89   | 0.66          | 1.20            |
| WHS      | 8    | 0.244 0.224 | 395 238 47 326 199 23       | 680 548   | 1.42     | 0.2328094     | 1  | 0.89   | 0.74          | 1.08          | 0.80   | 0.55          | 1.16            |
| PBCS 1+2 | 7    | 0.237 0.217 | 1306 819 124 640 372 43     | 2249 1055 | 3.12     | 0.077288      | 1  | 0.89   | 0.79          | 1.01          | 0.80   | 0.62          | 1.03            |

Locus Alleles Chr Location Neighborhood  
rs10850145 C|T 12q24.13 112428512

| SUBSET   | Rank | MAF         | Geno Counts               | Subjects  | score X2 | score p-value | df | het OR | het OR 95% CI | het OR 95% CI | hom OR | hom OR 95% CI | hom OR 95% CI_u |
|----------|------|-------------|---------------------------|-----------|----------|---------------|----|--------|---------------|---------------|--------|---------------|-----------------|
| STAGE1-3 | 4    | 0.094 0.109 | 7261 1521 74 4054 1012 52 | 8856 5118 | 16.05    | 0.00006178    | 1  | 1.18   | 1.09          | 1.28          | 1.40   | 1.19          | 1.65            |
| NHS      | 10   | 0.085 0.108 | 951 185 5 642 155 10      | 1141 807  | 6.01     | 0.0142552     | 1  | 1.32   | 1.06          | 1.64          | 1.73   | 1.11          | 2.68            |
| STAGE1-2 | 5    | 0.089 0.110 | 4388 849 47 2781 693 41   | 5284 3515 | 18.57    | 0.00001634    | 1  | 1.25   | 1.13          | 1.38          | 1.56   | 1.27          | 1.91            |
| STAGE2   | 5    | 0.090 0.111 | 3437 664 42 2139 538 31   | 4143 2708 | 13.02    | 0.0003008     | 1  | 1.23   | 1.10          | 1.38          | 1.52   | 1.21          | 1.92            |
| CPSII    | 12   | 0.099 0.111 | 444 90 9 250 62 4         | 543 316   | 0.68     | 0.4112802     | 1  | 1.14   | 0.83          | 1.56          | 1.30   | 0.69          | 2.44            |
| PBCS1    | 7    | 0.094 0.123 | 417 83 6 270 79 4         | 506 353   | 3.16     | 0.0753782     | 1  | 1.33   | 0.97          | 1.82          | 1.77   | 0.94          | 3.31            |
| PLCO     | 3    | 0.077 0.106 | 832 135 8 357 87 4        | 975 448   | 5.51     | 0.0189466     | 1  | 1.38   | 1.05          | 1.82          | 1.92   | 1.11          | 3.31            |
| WHI      | 8    | 0.094 0.110 | 1982 403 24 1378 341 21   | 2409 1740 | 6.10     | 0.0135564     | 1  | 1.20   | 1.04          | 1.39          | 1.44   | 1.08          | 1.93            |
| STAGE3   | 13   | 0.102 0.106 | 2873 673 27 1275 319 11   | 3573 1605 | 0.61     | 0.4341663     | 1  | 1.06   | 0.92          | 1.22          | 1.12   | 0.84          | 1.49            |
| NHS2     | 20   | 0.103 0.099 | 905 207 12 280 56 6       | 1124 342  | 0.06     | 0.8012497     | 1  | 0.96   | 0.73          | 1.28          | 0.93   | 0.53          | 1.64            |
| PBCS2    | 18   | 0.104 0.107 | 1412 338 15 565 143 5     | 1765 713  | 0.10     | 0.7546111     | 1  | 1.03   | 0.84          | 1.27          | 1.07   | 0.71          | 1.61            |
| WHS      | 6    | 0.094 0.109 | 556 128 0 430 120 0       | 684 550   | 1.60     | 0.2065859     | 1  | 1.20   | 0.91          | 1.58          | 1.43   | 0.82          | 2.51            |
| PBCS 1+2 | 9    | 0.102 0.113 | 1829 420 21 833 222 9     | 2270 1064 | 1.75     | 0.1857734     | 1  | 1.12   | 0.95          | 1.33          | 1.26   | 0.90          | 1.76            |

Locus Alleles Chr Location Neighborhood  
rs12608723 A|G 19q13.11 38508973

| SUBSET   | Rank | MAF         | Geno Counts                | Subjects  | score X2 | score p-value | df | het OR | het OR 95% CI | het OR 95% CI | hom OR | hom OR 95% CI | hom OR 95% CI_u |
|----------|------|-------------|----------------------------|-----------|----------|---------------|----|--------|---------------|---------------|--------|---------------|-----------------|
| STAGE1-3 | 5    | 0.136 0.121 | 6618 2036 188 3939 1089 75 | 8842 5103 | 15.48    | 0.00008342    | 1  | 0.86   | 0.80          | 0.93          | 0.74   | 0.64          | 0.86            |
| NHS      | 4    | 0.153 0.121 | 818 296 27 624 169 13      | 1141 806  | 9.01     | 0.0026827     | 1  | 0.75   | 0.62          | 0.91          | 0.56   | 0.38          | 0.82            |
| STAGE1-2 | 6    | 0.143 0.122 | 3887 1281 116 2710 757 49  | 5284 3516 | 17.92    | 0.00002307    | 1  | 0.82   | 0.75          | 0.90          | 0.68   | 0.57          | 0.81            |
| STAGE2   | 8    | 0.140 0.122 | 3069 985 89 2086 588 36    | 4143 2710 | 10.08    | 0.0014998     | 1  | 0.85   | 0.76          | 0.94          | 0.72   | 0.58          | 0.88            |
| CPSII    | 6    | 0.140 0.114 | 398 138 7 250 60 6         | 543 316   | 1.61     | 0.2046882     | 1  | 0.82   | 0.60          | 1.11          | 0.67   | 0.36          | 1.24            |
| PBCS1    | 1    | 0.153 0.110 | 364 129 13 278 72 3        | 506 353   | 6.04     | 0.0140042     | 1  | 0.69   | 0.51          | 0.93          | 0.48   | 0.26          | 0.86            |
| PLCO     | 8    | 0.132 0.116 | 738 216 21 348 96 4        | 975 448   | 1.49     | 0.2221232     | 1  | 0.86   | 0.67          | 1.10          | 0.74   | 0.45          | 1.20            |
| WHI      | 14   | 0.141 0.126 | 1783 572 54 1330 386 26    | 2409 1742 | 3.99     | 0.0458357     | 1  | 0.88   | 0.77          | 1.00          | 0.77   | 0.60          | 1.00            |

|          |    |             |                         |           |      |           |   |      |      |      |      |      |      |
|----------|----|-------------|-------------------------|-----------|------|-----------|---|------|------|------|------|------|------|
| STAGE3   | 9  | 0.127 0.122 | 2733 758 72/1229 335 26 | 3563 1590 | 0.72 | 0.3974156 | 1 | 0.95 | 0.83 | 1.08 | 0.90 | 0.69 | 1.16 |
| NHS2     | 14 | 0.126 0.118 | 869 243 21/261 69 5     | 1133 335  | 0.25 | 0.6138532 | 1 | 0.93 | 0.72 | 1.22 | 0.87 | 0.52 | 1.48 |
| PBCS2    | 17 | 0.124 0.119 | 1344 368 32/554 145 12  | 1744 711  | 0.24 | 0.6238349 | 1 | 0.95 | 0.79 | 1.15 | 0.91 | 0.62 | 1.33 |
| WHS      | 14 | 0.135 0.128 | 520 147 19/414 121 9    | 686 544   | 0.26 | 0.6098418 | 1 | 0.94 | 0.75 | 1.19 | 0.89 | 0.56 | 1.41 |
| PBCS 1+2 | 5  | 0.130 0.115 | 1706 494 45/832 214 15  | 2245 1061 | 3.54 | 0.0598929 | 1 | 0.86 | 0.73 | 1.01 | 0.74 | 0.54 | 1.01 |

Locus Alleles Chr Location Neighborhood  
rs4415084 C|T 5p12 44698272

| SUBSET   | Rank | MAF         | Geno Counts                  | Subjects  | score X2 | score p-value | df | het OR | het OR 95% CI | het OR 95% CI | hom OR | hom OR 95% CI | hom OR 95% CI_u |
|----------|------|-------------|------------------------------|-----------|----------|---------------|----|--------|---------------|---------------|--------|---------------|-----------------|
| STAGE1-3 | 6    | 0.407 0.431 | 3135 4180 1492/1673 2433 970 | 8807 5076 | 15.26    | 0.00009379    | 1  | 1.10   | 1.05          | 1.16          | 1.22   | 1.10          | 1.35            |
| NHS      | 6    | 0.392 0.437 | 429 513 185/240 421 139      | 1127 800  | 7.53     | 0.0060766     | 1  | 1.20   | 1.05          | 1.37          | 1.44   | 1.11          | 1.88            |
| STAGE1-2 | 9    | 0.401 0.429 | 1895 2517 857/1154 1698 657  | 5269 3509 | 12.64    | 0.0003767     | 1  | 1.12   | 1.05          | 1.19          | 1.25   | 1.11          | 1.41            |
| STAGE2   | 12   | 0.404 0.427 | 1466 2004 672/914 1277 518   | 4142 2709 | 6.51     | 0.010729      | 1  | 1.10   | 1.02          | 1.17          | 1.20   | 1.04          | 1.38            |
| CPSII    | 3    | 0.427 0.389 | 178 265 99/121 144 51        | 542 316   | 2.69     | 0.1009002     | 1  | 0.85   | 0.69          | 1.03          | 0.71   | 0.48          | 1.07            |
| PBCS1    | 5    | 0.410 0.463 | 174 249 83/97 185 71         | 506 353   | 4.01     | 0.0453369     | 1  | 1.23   | 1.00          | 1.50          | 1.51   | 1.01          | 2.25            |
| PLCO     | 20   | 0.408 0.407 | 339 475 160/163 205 80       | 974 448   | 0.04     | 0.8373449     | 1  | 0.98   | 0.84          | 1.16          | 0.97   | 0.70          | 1.34            |
| WHI      | 7    | 0.400 0.429 | 866 1158 385/588 813 340     | 2409 1741 | 7.09     | 0.0077327     | 1  | 1.13   | 1.03          | 1.23          | 1.27   | 1.07          | 1.52            |
| STAGE3   | 3    | 0.415 0.435 | 1240 1666 636/520 739 315    | 3542 1574 | 3.73     | 0.0532981     | 1  | 1.09   | 1.00          | 1.18          | 1.18   | 1.00          | 1.40            |
| NHS2     | 3    | 0.402 0.449 | 413 517 193/105 156 71       | 1123 332  | 4.36     | 0.0368712     | 1  | 1.20   | 1.01          | 1.42          | 1.44   | 1.02          | 2.03            |
| PBCS2    | 7    | 0.424 0.440 | 593 833 328/226 346 140      | 1754 712  | 0.99     | 0.3190255     | 1  | 1.06   | 0.94          | 1.20          | 1.13   | 0.89          | 1.45            |
| WHS      | 18   | 0.411 0.420 | 234 316 115/189 237 104      | 665 530   | 0.19     | 0.6628552     | 1  | 1.04   | 0.88          | 1.22          | 1.07   | 0.78          | 1.48            |
| PBCS 1+2 | 4    | 0.421 0.447 | 767 1079 410/322 527 209     | 2256 1058 | 3.63     | 0.0568797     | 1  | 1.11   | 1.00          | 1.23          | 1.23   | 0.99          | 1.51            |

Locus Alleles Chr Location Neighborhood  
rs9491859 C|A 6q22.33 128106056 C6orf190

| SUBSET   | Rank | MAF         | Geno Counts                  | Subjects  | score X2 | score p-value | df | het OR | het OR 95% CI | het OR 95% CI | hom OR | hom OR 95% CI | hom OR 95% CI_u |
|----------|------|-------------|------------------------------|-----------|----------|---------------|----|--------|---------------|---------------|--------|---------------|-----------------|
| STAGE1-3 | 7    | 0.352 0.377 | 3704 4014 1097/2017 2314 764 | 8815 5095 | 15.20    | 0.00009667    | 1  | 1.11   | 1.05          | 1.16          | 1.23   | 1.11          | 1.36            |
| NHS      | 14   | 0.356 0.375 | 459 551 130/325 359 123      | 1140 807  | 1.17     | 0.2802203     | 1  | 1.08   | 0.94          | 1.23          | 1.16   | 0.89          | 1.51            |
| STAGE1-2 | 8    | 0.348 0.377 | 2226 2432 625/1401 1579 536  | 5283 3516 | 13.07    | 0.0002993     | 1  | 1.12   | 1.05          | 1.20          | 1.26   | 1.11          | 1.43            |
| STAGE2   | 6    | 0.346 0.378 | 1767 1881 495/1076 1220 413  | 4143 2709 | 12.30    | 0.000454      | 1  | 1.14   | 1.06          | 1.22          | 1.29   | 1.12          | 1.49            |
| CPSII    | 23   | 0.350 0.351 | 220 266 57/137 136 43        | 543 316   | 0.00     | 0.9673399     | 1  | 1.00   | 0.81          | 1.23          | 0.99   | 0.65          | 1.51            |
| PBCS1    | 16   | 0.345 0.364 | 216 231 59/147 154 51        | 506 352   | 0.45     | 0.5030632     | 1  | 1.07   | 0.88          | 1.31          | 1.15   | 0.77          | 1.72            |
| PLCO     | 4    | 0.333 0.376 | 437 427 111/170 219 59       | 975 448   | 4.23     | 0.0396606     | 1  | 1.19   | 1.01          | 1.41          | 1.42   | 1.02          | 1.99            |
| WHI      | 5    | 0.351 0.384 | 1018 1093 298/682 781 279    | 2409 1742 | 9.67     | 0.0018727     | 1  | 1.15   | 1.05          | 1.26          | 1.33   | 1.11          | 1.59            |
| STAGE3   | 4    | 0.358 0.377 | 1479 1586 472/617 735 228    | 3537 1580 | 2.68     | 0.1018351     | 1  | 1.08   | 0.99          | 1.17          | 1.16   | 0.97          | 1.38            |
| NHS2     | 22   | 0.368 0.371 | 459 501 163/139 147 52       | 1123 338  | 0.02     | 0.8996766     | 1  | 1.01   | 0.85          | 1.20          | 1.02   | 0.72          | 1.45            |
| PBCS2    | 6    | 0.349 0.365 | 744 779 218/286 322 96       | 1741 704  | 1.01     | 0.3154593     | 1  | 1.07   | 0.94          | 1.22          | 1.14   | 0.88          | 1.48            |
| WHS      | 2    | 0.363 0.396 | 276 306 91/192 266 80        | 673 538   | 3.30     | 0.0694087     | 1  | 1.17   | 0.99          | 1.38          | 1.36   | 0.98          | 1.90            |
| PBCS 1+2 | 8    | 0.348 0.365 | 959 1006 277/432 476 147     | 2242 1055 | 1.93     | 0.1647897     | 1  | 1.08   | 0.97          | 1.20          | 1.17   | 0.94          | 1.45            |

Locus Alleles Chr Location Neighborhood  
rs2067980 A|G 5p12 45018074

| SUBSET   | Rank | MAF         | Geno Counts                 | Subjects  | score X2 | score p-value | df | het OR | het OR 95% CI | het OR 95% CI | hom OR | hom OR 95% CI | hom OR 95% CI_u |
|----------|------|-------------|-----------------------------|-----------|----------|---------------|----|--------|---------------|---------------|--------|---------------|-----------------|
| STAGE1-3 | 8    | 0.160 0.176 | 6228 2348 240/3497 1411 190 | 8816 5098 | 13.07    | 0.0002996     | 1  | 1.13   | 1.06          | 1.20          | 1.27   | 1.12          | 1.45            |
| NHS      | 9    | 0.151 0.179 | 814 310 17/542 240 24       | 1141 806  | 6.05     | 0.0139364     | 1  | 1.25   | 1.05          | 1.49          | 1.55   | 1.09          | 2.21            |
| STAGE1-2 | 4    | 0.150 0.175 | 3805 1374 105/2412 975 129  | 5284 3516 | 19.63    | 0.000009395   | 1  | 1.20   | 1.11          | 1.31          | 1.45   | 1.23          | 1.71            |
| STAGE2   | 4    | 0.150 0.174 | 2991 1064 88/1870 735 105   | 4143 2710 | 13.59    | 0.000227      | 1  | 1.19   | 1.08          | 1.31          | 1.42   | 1.18          | 1.71            |
| CPSII    | 20   | 0.159 0.171 | 383 147 13/221 82 13        | 543 316   | 0.10     | 0.7567934     | 1  | 1.04   | 0.80          | 1.36          | 1.09   | 0.64          | 1.84            |
| PBCS1    | 3    | 0.191 0.231 | 335 149 22/208 127 18       | 506 353   | 4.42     | 0.0355809     | 1  | 1.29   | 1.02          | 1.63          | 1.66   | 1.03          | 2.66            |
| PLCO     | 13   | 0.144 0.156 | 714 241 20/322 112 14       | 975 448   | 0.46     | 0.4996842     | 1  | 1.08   | 0.86          | 1.35          | 1.16   | 0.75          | 1.81            |
| WHI      | 4    | 0.143 0.170 | 1761 606 42/1216 460 66     | 2409 1742 | 10.98    | 0.0009207     | 1  | 1.22   | 1.09          | 1.38          | 1.50   | 1.18          | 1.90            |

|          |    |             |                          |           |      |           |   |      |      |      |      |      |      |
|----------|----|-------------|--------------------------|-----------|------|-----------|---|------|------|------|------|------|------|
| STAGE3   | 20 | 0.176 0.177 | 2423 975 135 1085 437 61 | 3533 1583 | 0.12 | 0.7241841 | 1 | 1.02 | 0.91 | 1.14 | 1.04 | 0.84 | 1.29 |
| NHS2     | 15 | 0.169 0.161 | 777 292 42 240 79 14     | 1111 333  | 0.25 | 0.6191556 | 1 | 0.94 | 0.75 | 1.18 | 0.89 | 0.57 | 1.40 |
| PBCS2    | 21 | 0.190 0.188 | 1158 519 73 467 211 27   | 1750 705  | 0.01 | 0.9040873 | 1 | 0.99 | 0.85 | 1.16 | 0.98 | 0.72 | 1.34 |
| WHS      | 5  | 0.152 0.172 | 488 164 20 378 147 20    | 672 545   | 1.72 | 0.1898069 | 1 | 1.15 | 0.93 | 1.42 | 1.33 | 0.87 | 2.03 |
| PBCS 1+2 | 15 | 0.190 0.202 | 1493 667 95 675 337 45   | 2255 1057 | 0.85 | 0.3558591 | 1 | 1.06 | 0.93 | 1.21 | 1.13 | 0.87 | 1.46 |

Locus Alleles Chr Location Neighborhood  
rs2303659 G|A 11q24.3 129326474 PRDM10

| SUBSET   | Rank | MAF         | Geno Counts            | Subjects  | score X2 | score p-value | df | het OR | het OR 95% CI | het OR 95% CI | hom OR | hom OR 95% CI | hom OR 95% CI_u |
|----------|------|-------------|------------------------|-----------|----------|---------------|----|--------|---------------|---------------|--------|---------------|-----------------|
| STAGE1-3 | 9    | 0.034 0.026 | 8222 583 10 4833 251 9 | 8815 5093 | 11.57    | 0.0006714     | 1  | 0.78   | 0.67          | 0.90          | 0.60   | 0.45          | 0.81            |
| NHS      | 13   | 0.034 0.026 | 1063 78 0 765 42 0     | 1141 807  | 2.04     | 0.1528149     | 1  | 0.75   | 0.51          | 1.11          | 0.57   | 0.26          | 1.24            |
| STAGE1-2 | 11   | 0.034 0.025 | 4926 356 2 3341 174 2  | 5284 3517 | 11.09    | 0.0008663     | 1  | 0.73   | 0.61          | 0.88          | 0.53   | 0.37          | 0.77            |
| STAGE2   | 9    | 0.034 0.025 | 3863 278 2 2576 132 2  | 4143 2710 | 9.10     | 0.0025546     | 1  | 0.72   | 0.59          | 0.89          | 0.53   | 0.34          | 0.80            |
| CPSII    | 5    | 0.030 0.019 | 510 33 0 305 10 1      | 543 316   | 1.81     | 0.1782591     | 1  | 0.63   | 0.32          | 1.24          | 0.40   | 0.10          | 1.54            |
| PBCS1    | 10   | 0.033 0.024 | 473 33 0 336 17 0      | 506 353   | 1.53     | 0.2160677     | 1  | 0.68   | 0.37          | 1.25          | 0.46   | 0.14          | 1.57            |
| PLCO     | 7    | 0.036 0.026 | 906 68 1 425 23 0      | 975 448   | 1.97     | 0.1603545     | 1  | 0.71   | 0.44          | 1.15          | 0.50   | 0.19          | 1.32            |
| WHI      | 9    | 0.034 0.025 | 2245 163 1 1655 86 1   | 2409 1742 | 5.82     | 0.0158014     | 1  | 0.72   | 0.55          | 0.94          | 0.52   | 0.31          | 0.89            |
| STAGE3   | 5    | 0.034 0.029 | 3296 227 8 1493 77 7   | 3531 1577 | 1.46     | 0.2270283     | 1  | 0.86   | 0.68          | 1.10          | 0.74   | 0.46          | 1.20            |
| NHS2     | 8    | 0.039 0.030 | 1029 77 5 321 14 3     | 1111 338  | 1.16     | 0.2816549     | 1  | 0.77   | 0.48          | 1.24          | 0.60   | 0.23          | 1.53            |
| PBCS2    | 12   | 0.032 0.028 | 1648 112 1 669 40 0    | 1761 709  | 0.45     | 0.5017352     | 1  | 0.88   | 0.61          | 1.28          | 0.78   | 0.37          | 1.63            |
| WHS      | 19   | 0.032 0.029 | 619 38 2 503 23 4      | 659 530   | 0.06     | 0.799899      | 1  | 0.94   | 0.61          | 1.47          | 0.89   | 0.37          | 2.17            |
| PBCS 1+2 | 12   | 0.032 0.027 | 2121 145 1 1004 57 0   | 2267 1061 | 1.38     | 0.2407403     | 1  | 0.83   | 0.60          | 1.14          | 0.69   | 0.36          | 1.29            |

Locus Alleles Chr Location Neighborhood  
rs17570439 T|C 1p34.2 40096797 TRIT1

| SUBSET   | Rank | MAF         | Geno Counts                 | Subjects  | score X2 | score p-value | df | het OR | het OR 95% CI | het OR 95% CI | hom OR | hom OR 95% CI | hom OR 95% CI_u |
|----------|------|-------------|-----------------------------|-----------|----------|---------------|----|--------|---------------|---------------|--------|---------------|-----------------|
| STAGE1-3 | 10   | 0.208 0.224 | 5507 2905 379 3076 1762 263 | 8791 5101 | 10.71    | 0.001066      | 1  | 1.11   | 1.04          | 1.17          | 1.22   | 1.08          | 1.38            |
| NHS      | 2    | 0.204 0.245 | 718 381 42 457 304 46       | 1141 807  | 10.43    | 0.0012406     | 1  | 1.29   | 1.11          | 1.51          | 1.67   | 1.22          | 2.28            |
| STAGE1-2 | 10   | 0.208 0.229 | 3285 1798 201 2104 1217 196 | 5284 3517 | 12.03    | 0.0005249     | 1  | 1.14   | 1.06          | 1.23          | 1.30   | 1.12          | 1.51            |
| STAGE2   | 17   | 0.209 0.224 | 2567 1417 159 1647 913 150  | 4143 2710 | 4.75     | 0.0292427     | 1  | 1.10   | 1.01          | 1.19          | 1.21   | 1.02          | 1.43            |
| CPSII    | 21   | 0.196 0.201 | 343 187 13 203 99 14        | 543 316   | 0.07     | 0.7916021     | 1  | 1.04   | 0.80          | 1.34          | 1.07   | 0.64          | 1.78            |
| PBCS1    | 20   | 0.210 0.215 | 310 179 17 223 108 22       | 506 353   | 0.04     | 0.8403297     | 1  | 1.02   | 0.81          | 1.30          | 1.05   | 0.65          | 1.69            |
| PLCO     | 9    | 0.220 0.238 | 599 323 53 259 165 24       | 975 448   | 1.48     | 0.2230441     | 1  | 1.12   | 0.93          | 1.36          | 1.26   | 0.87          | 1.84            |
| WHI      | 11   | 0.206 0.225 | 1501 825 83 1053 594 95     | 2409 1742 | 4.67     | 0.0306361     | 1  | 1.13   | 1.01          | 1.25          | 1.27   | 1.02          | 1.57            |
| STAGE3   | 15   | 0.209 0.214 | 2222 1108 178 972 545 67    | 3508 1584 | 0.35     | 0.5548943     | 1  | 1.03   | 0.93          | 1.14          | 1.06   | 0.87          | 1.31            |
| NHS2     | 7    | 0.208 0.229 | 694 332 60 194 119 16       | 1086 329  | 1.38     | 0.2409139     | 1  | 1.13   | 0.92          | 1.39          | 1.28   | 0.85          | 1.92            |
| PBCS2    | 24   | 0.208 0.210 | 1111 557 86 448 228 35      | 1754 711  | 0.00     | 0.9905603     | 1  | 1.00   | 0.86          | 1.16          | 1.00   | 0.74          | 1.35            |
| WHS      | 24   | 0.212 0.211 | 417 219 32 330 198 16       | 668 544   | 0.00     | 0.997584      | 1  | 1.00   | 0.82          | 1.22          | 1.00   | 0.67          | 1.49            |
| PBCS 1+2 | 18   | 0.208 0.211 | 1421 735 103 671 336 57     | 2259 1064 | 0.06     | 0.8022459     | 1  | 1.02   | 0.90          | 1.15          | 1.03   | 0.80          | 1.33            |

Locus Alleles Chr Location Neighborhood  
rs3134615 G|T 1p34.2 40134653 TRIT1,MYCL1

| SUBSET   | Rank | MAF         | Geno Counts                 | Subjects  | score X2 | score p-value | df | het OR | het OR 95% CI | het OR 95% CI | hom OR | hom OR 95% CI | hom OR 95% CI_u |
|----------|------|-------------|-----------------------------|-----------|----------|---------------|----|--------|---------------|---------------|--------|---------------|-----------------|
| STAGE1-3 | 11   | 0.227 0.243 | 5293 3091 463 2906 1906 288 | 8847 5100 | 10.01    | 0.0015576     | 1  | 1.10   | 1.04          | 1.16          | 1.21   | 1.07          | 1.36            |
| NHS      | 3    | 0.220 0.262 | 689 402 50 433 325 49       | 1141 807  | 10.37    | 0.0012816     | 1  | 1.29   | 1.10          | 1.50          | 1.65   | 1.22          | 2.24            |
| STAGE1-2 | 13   | 0.228 0.248 | 3133 1895 256 1984 1323 210 | 5284 3517 | 10.50    | 0.0011911     | 1  | 1.13   | 1.05          | 1.21          | 1.27   | 1.10          | 1.46            |
| STAGE2   | 18   | 0.230 0.244 | 2444 1493 206 1551 998 161  | 4143 2710 | 3.77     | 0.0521358     | 1  | 1.08   | 1.00          | 1.18          | 1.18   | 1.00          | 1.38            |
| CPSII    | 19   | 0.215 0.222 | 326 200 17 193 106 17       | 543 316   | 0.14     | 0.7111337     | 1  | 1.05   | 0.82          | 1.34          | 1.10   | 0.67          | 1.79            |
| PBCS1    | 19   | 0.226 0.231 | 299 185 22 213 117 23       | 506 353   | 0.04     | 0.8346616     | 1  | 1.03   | 0.81          | 1.29          | 1.05   | 0.66          | 1.68            |
| PLCO     | 11   | 0.236 0.253 | 578 334 63 247 175 26       | 975 448   | 1.22     | 0.2686033     | 1  | 1.11   | 0.92          | 1.33          | 1.23   | 0.85          | 1.78            |
| WHI      | 13   | 0.229 0.247 | 1421 875 113 985 654 103    | 2409 1742 | 3.99     | 0.045719      | 1  | 1.11   | 1.00          | 1.23          | 1.23   | 1.00          | 1.52            |

|          |    |             |                          |           |      |           |   |      |      |      |      |      |      |
|----------|----|-------------|--------------------------|-----------|------|-----------|---|------|------|------|------|------|------|
| STAGE3   | 10 | 0.226 0.234 | 2160 1196 207 922 585 79 | 3563 1586 | 0.70 | 0.4024152 | 1 | 1.04 | 0.94 | 1.15 | 1.09 | 0.89 | 1.33 |
| NHS2     | 11 | 0.228 0.241 | 687 372 72 190 124 18    | 1131 332  | 0.47 | 0.4922571 | 1 | 1.07 | 0.88 | 1.31 | 1.15 | 0.77 | 1.71 |
| PBCS2    | 19 | 0.226 0.225 | 1063 591 102 427 240 39  | 1756 706  | 0.06 | 0.8143252 | 1 | 0.98 | 0.85 | 1.14 | 0.97 | 0.72 | 1.29 |
| WHS      | 7  | 0.221 0.242 | 410 233 33 305 221 22    | 676 548   | 1.51 | 0.218539  | 1 | 1.13 | 0.93 | 1.37 | 1.28 | 0.87 | 1.88 |
| PBCS 1+2 | 22 | 0.226 0.226 | 1362 776 124 640 355 61  | 2262 1056 | 0.00 | 0.9500576 | 1 | 1.00 | 0.88 | 1.13 | 0.99 | 0.78 | 1.27 |

Locus Alleles Chr Location Neighborhood  
rs37936 A|G 7q21.11 79806994

| SUBSET   | Rank | MAF         | Geno Counts                  | Subjects  | score X2 | score p-value | df | het OR | het OR 95% CI | het OR 95% CI | hom OR | hom OR 95% CI | hom OR 95% CI_u |
|----------|------|-------------|------------------------------|-----------|----------|---------------|----|--------|---------------|---------------|--------|---------------|-----------------|
| STAGE1-3 | 12   | 0.384 0.367 | 3358 3974 1348 2015 2294 686 | 8680 4995 | 9.68     | 0.0018643     | 1  | 0.92   | 0.88          | 0.97          | 0.85   | 0.77          | 0.94            |
| NHS      | 8    | 0.399 0.362 | 403 541 177 333 343 115      | 1121 791  | 6.23     | 0.0125936     | 1  | 0.84   | 0.74          | 0.96          | 0.71   | 0.55          | 0.93            |
| STAGE1-2 | 3    | 0.400 0.362 | 1731 2149 796 1268 1397 418  | 4676 3083 | 24.06    | 9.338E-07     | 1  | 0.85   | 0.79          | 0.91          | 0.72   | 0.63          | 0.82            |
| STAGE2   | 1    | 0.400 0.362 | 1328 1608 619 935 1054 303   | 3555 2292 | 17.82    | 0.00002429    | 1  | 0.85   | 0.79          | 0.92          | 0.72   | 0.62          | 0.84            |
| CPSII    | 8    | 0.387 0.355 | 199 251 79 131 139 41        | 529 311   | 1.37     | 0.2424311     | 1  | 0.88   | 0.72          | 1.09          | 0.78   | 0.52          | 1.18            |
| PLCO     | 18   | 0.378 0.372 | 379 431 146 181 186 69       | 956 436   | 0.19     | 0.6622152     | 1  | 0.97   | 0.82          | 1.14          | 0.93   | 0.67          | 1.29            |
| WHI      | 2    | 0.409 0.362 | 857 1064 430 680 800 212     | 2351 1692 | 18.17    | 0.00002023    | 1  | 0.82   | 0.75          | 0.90          | 0.68   | 0.56          | 0.81            |
| STAGE3   | 12   | 0.366 0.374 | 1434 1610 490 618 750 218    | 3534 1586 | 0.65     | 0.419432      | 1  | 1.04   | 0.95          | 1.13          | 1.08   | 0.90          | 1.28            |
| NHS2     | 4    | 0.366 0.404 | 457 508 157 122 166 56       | 1122 344  | 3.12     | 0.0775064     | 1  | 1.17   | 0.98          | 1.39          | 1.37   | 0.97          | 1.93            |
| PBCS2    | 14   | 0.368 0.360 | 706 782 248 283 324 88       | 1736 695  | 0.32     | 0.5704565     | 1  | 0.96   | 0.85          | 1.10          | 0.93   | 0.72          | 1.20            |
| WHS      | 13   | 0.362 0.373 | 271 320 85 213 260 74        | 676 547   | 0.33     | 0.5670119     | 1  | 1.05   | 0.89          | 1.24          | 1.10   | 0.79          | 1.54            |
| PBCS 1+2 | 20   | 0.367 0.366 | 899 997 310 412 471 138      | 2206 1021 | 0.02     | 0.8772369     | 1  | 0.99   | 0.89          | 1.11          | 0.98   | 0.79          | 1.22            |

Locus Alleles Chr Location Neighborhood  
rs12622050 G|A 2q11.2 100945886 NPAS2

| SUBSET   | Rank | MAF         | Geno Counts                 | Subjects  | score X2 | score p-value | df | het OR | het OR 95% CI | het OR 95% CI | hom OR | hom OR 95% CI | hom OR 95% CI_u |
|----------|------|-------------|-----------------------------|-----------|----------|---------------|----|--------|---------------|---------------|--------|---------------|-----------------|
| STAGE1-3 | 13   | 0.225 0.209 | 5271 3090 432 3197 1647 236 | 8793 5080 | 8.73     | 0.0031222     | 1  | 0.91   | 0.86          | 0.97          | 0.83   | 0.74          | 0.94            |
| NHS      | 11   | 0.220 0.189 | 694 392 55 529 251 27       | 1141 807  | 5.06     | 0.0244329     | 1  | 0.83   | 0.71          | 0.98          | 0.69   | 0.50          | 0.95            |
| STAGE1-2 | 14   | 0.220 0.200 | 3182 1875 227 2262 1101 152 | 5284 3515 | 10.49    | 0.0012028     | 1  | 0.88   | 0.82          | 0.95          | 0.78   | 0.67          | 0.91            |
| STAGE2   | 13   | 0.220 0.203 | 2488 1483 172 1733 850 125  | 4143 2708 | 6.09     | 0.0135721     | 1  | 0.90   | 0.82          | 0.98          | 0.81   | 0.68          | 0.96            |
| CPSII    | 17   | 0.217 0.213 | 323 203 16 201 94 20        | 542 315   | 0.17     | 0.6831867     | 1  | 0.95   | 0.74          | 1.22          | 0.90   | 0.55          | 1.48            |
| PBCS1    | 21   | 0.244 0.249 | 284 197 25 204 121 27       | 506 352   | 0.01     | 0.9166892     | 1  | 1.01   | 0.81          | 1.27          | 1.02   | 0.65          | 1.61            |
| PLCO     | 5    | 0.229 0.195 | 577 350 48 288 145 15       | 975 448   | 4.13     | 0.0420353     | 1  | 0.81   | 0.67          | 0.99          | 0.66   | 0.44          | 0.99            |
| WHI      | 10   | 0.213 0.194 | 1476 838 95 1138 530 73     | 2409 1741 | 4.89     | 0.0270158     | 1  | 0.88   | 0.79          | 0.99          | 0.78   | 0.63          | 0.97            |
| STAGE3   | 16   | 0.232 0.228 | 2090 1217 205 936 547 83    | 3512 1566 | 0.30     | 0.5812031     | 1  | 0.97   | 0.88          | 1.08          | 0.94   | 0.77          | 1.16            |
| NHS2     | 10   | 0.200 0.216 | 712 332 53 202 112 15       | 1097 329  | 0.77     | 0.3810143     | 1  | 1.10   | 0.89          | 1.35          | 1.21   | 0.79          | 1.83            |
| PBCS2    | 16   | 0.252 0.245 | 980 644 117 402 254 45      | 1741 701  | 0.26     | 0.6132154     | 1  | 0.96   | 0.83          | 1.11          | 0.93   | 0.70          | 1.24            |
| WHS      | 9    | 0.231 0.212 | 398 241 35 332 181 23       | 674 536   | 1.36     | 0.24379       | 1  | 0.89   | 0.73          | 1.08          | 0.79   | 0.54          | 1.17            |
| PBCS 1+2 | 19   | 0.250 0.247 | 1263 839 142 605 374 73     | 2244 1052 | 0.06     | 0.81222       | 1  | 0.99   | 0.87          | 1.11          | 0.97   | 0.76          | 1.23            |

Locus Alleles Chr Location Neighborhood  
rs1274466 T|C 10p11.21 34510210 PARD3

| SUBSET   | Rank | MAF         | Geno Counts                  | Subjects  | score X2 | score p-value | df | het OR | het OR 95% CI | het OR 95% CI | hom OR | hom OR 95% CI | hom OR 95% CI_u |
|----------|------|-------------|------------------------------|-----------|----------|---------------|----|--------|---------------|---------------|--------|---------------|-----------------|
| STAGE1-3 | 14   | 0.451 0.434 | 2683 4344 1810 1648 2482 973 | 8837 5103 | 7.15     | 0.0074949     | 1  | 0.93   | 0.89          | 0.98          | 0.87   | 0.79          | 0.96            |
| NHS      | 12   | 0.470 0.436 | 312 585 244 261 388 158      | 1141 807  | 4.28     | 0.0385055     | 1  | 0.87   | 0.77          | 0.99          | 0.76   | 0.59          | 0.99            |
| STAGE1-2 | 12   | 0.454 0.429 | 1574 2618 1092 1164 1687 665 | 5284 3516 | 11.04    | 0.0008937     | 1  | 0.90   | 0.85          | 0.96          | 0.81   | 0.72          | 0.92            |
| STAGE2   | 11   | 0.450 0.427 | 1262 2033 848 903 1299 507   | 4143 2709 | 7.15     | 0.0075106     | 1  | 0.91   | 0.85          | 0.98          | 0.83   | 0.72          | 0.95            |
| CPSII    | 7    | 0.471 0.440 | 152 271 120 101 152 63       | 543 316   | 1.58     | 0.2082563     | 1  | 0.88   | 0.72          | 1.07          | 0.77   | 0.52          | 1.15            |
| PBCS1    | 15   | 0.483 0.457 | 138 247 121 104 174 74       | 506 352   | 0.47     | 0.4949307     | 1  | 0.93   | 0.77          | 1.14          | 0.87   | 0.59          | 1.29            |
| PLCO     | 1    | 0.449 0.391 | 298 478 199 167 212 69       | 975 448   | 8.33     | 0.003895      | 1  | 0.79   | 0.67          | 0.93          | 0.62   | 0.45          | 0.86            |
| WHI      | 18   | 0.443 0.428 | 755 1175 479 579 835 328     | 2409 1742 | 1.88     | 0.1699882     | 1  | 0.94   | 0.86          | 1.03          | 0.88   | 0.74          | 1.05            |
| STAGE3   | 23   | 0.445 0.445 | 1109 1730 719 484 795 309    | 3558 1588 | 0.00     | 0.9649295     | 1  | 1.00   | 0.92          | 1.09          | 1.00   | 0.85          | 1.19            |



|          |    |             |                          |           |      |           |   |      |      |      |      |      |      |
|----------|----|-------------|--------------------------|-----------|------|-----------|---|------|------|------|------|------|------|
| NHS2     | 18 | 0.440 0.432 | 363 535 227 106 166 61   | 1125 333  | 0.12 | 0.7283735 | 1 | 0.97 | 0.82 | 1.15 | 0.94 | 0.67 | 1.33 |
| PBCS2    | 15 | 0.457 0.451 | 518 863 368/211 357 141  | 1749 709  | 0.26 | 0.6110287 | 1 | 0.97 | 0.85 | 1.10 | 0.94 | 0.73 | 1.20 |
| WHS      | 10 | 0.424 0.445 | 228 332 124/167 272 107  | 684 546   | 1.33 | 0.2481453 | 1 | 1.10 | 0.94 | 1.29 | 1.21 | 0.88 | 1.67 |
| PBCS 1+2 | 13 | 0.463 0.452 | 656 1106 488/315 531 214 | 2250 1060 | 0.96 | 0.326725  | 1 | 0.95 | 0.86 | 1.05 | 0.90 | 0.73 | 1.11 |

Locus Alleles Chr Location Neighborhood  
rs10941679 A|G 5p12 44742255

| SUBSET   | Rank | MAF         | Geno Counts               | Subjects  | score X2 | score p-value | df | het OR | het OR 95% CI | het OR 95% CI | hom OR | hom OR 95% CI | hom OR 95% CI_u |
|----------|------|-------------|---------------------------|-----------|----------|---------------|----|--------|---------------|---------------|--------|---------------|-----------------|
| STAGE1-3 | 15   | 0.259 0.282 | 2201 1519 277/978 787 146 | 3997 1911 | 6.68     | 0.0097669     | 1  | 1.12   | 1.03          | 1.23          | 1.26   | 1.06          | 1.50            |
| STAGE3   | 2    | 0.259 0.278 | 1945 1325 250/817 646 116 | 3520 1579 | 4.34     | 0.0372297     | 1  | 1.11   | 1.01          | 1.22          | 1.23   | 1.01          | 1.48            |
| NHS2     | 5    | 0.256 0.285 | 607 415 73/173 133 29     | 1095 335  | 2.19     | 0.1393495     | 1  | 1.16   | 0.95          | 1.40          | 1.34   | 0.91          | 1.96            |
| PBCS2    | 2    | 0.259 0.288 | 969 667 121/350 308 50    | 1757 708  | 4.77     | 0.0289114     | 1  | 1.17   | 1.02          | 1.34          | 1.36   | 1.03          | 1.80            |
| WHS      | 20   | 0.266 0.260 | 369 243 56/294 205 37     | 668 536   | 0.06     | 0.8068211     | 1  | 0.98   | 0.82          | 1.17          | 0.96   | 0.67          | 1.37            |
| PBCS 1+2 | 2    | 0.259 0.293 | 1225 861 148/511 449 80   | 2234 1040 | 7.61     | 0.0058122     | 1  | 1.18   | 1.05          | 1.33          | 1.39   | 1.10          | 1.76            |

Locus Alleles Chr Location Neighborhood  
rs724244 C|T 3p24.1 27217157 NEK10

| SUBSET   | Rank | MAF         | Geno Counts                 | Subjects  | score X2 | score p-value | df | het OR | het OR 95% CI | het OR 95% CI | hom OR | hom OR 95% CI | hom OR 95% CI_u |
|----------|------|-------------|-----------------------------|-----------|----------|---------------|----|--------|---------------|---------------|--------|---------------|-----------------|
| STAGE1-3 | 16   | 0.261 0.273 | 4211 2933 535/2281 1695 328 | 7679 4304 | 4.69     | 0.0303883     | 1  | 1.07   | 1.01          | 1.14          | 1.14   | 1.01          | 1.29            |
| STAGE1-2 | 15   | 0.252 0.275 | 2304 1588 250/1429 1071 209 | 4142 2709 | 8.63     | 0.0033141     | 1  | 1.12   | 1.04          | 1.22          | 1.26   | 1.08          | 1.48            |
| STAGE2   | 10   | 0.252 0.275 | 2304 1588 250/1429 1071 209 | 4142 2709 | 8.51     | 0.0035303     | 1  | 1.12   | 1.04          | 1.22          | 1.26   | 1.08          | 1.48            |
| CPSII    | 11   | 0.247 0.266 | 309 198 35/173 118 25       | 542 316   | 0.77     | 0.3816559     | 1  | 1.10   | 0.88          | 1.38          | 1.22   | 0.78          | 1.91            |
| PBCS1    | 11   | 0.246 0.265 | 293 177 36/198 123 32       | 506 353   | 1.06     | 0.303014      | 1  | 1.12   | 0.90          | 1.39          | 1.25   | 0.81          | 1.93            |
| PLCO     | 2    | 0.230 0.271 | 569 364 42/235 182 30       | 975 447   | 5.55     | 0.0184682     | 1  | 1.26   | 1.04          | 1.52          | 1.58   | 1.08          | 2.31            |
| WHI      | 15   | 0.263 0.280 | 1302 949 158/901 708 133    | 2409 1742 | 3.13     | 0.0769904     | 1  | 1.09   | 0.99          | 1.21          | 1.20   | 0.98          | 1.46            |
| STAGE3   | 24   | 0.271 0.270 | 1907 1349 285/852 624 119   | 3541 1595 | 0.00     | 0.991269      | 1  | 1.00   | 0.91          | 1.10          | 1.00   | 0.83          | 1.21            |
| NHS2     | 13   | 0.269 0.281 | 611 397 100/176 134 28      | 1108 338  | 0.32     | 0.5688925     | 1  | 1.06   | 0.88          | 1.27          | 1.11   | 0.77          | 1.61            |
| PBCS2    | 13   | 0.273 0.265 | 926 696 131/381 280 48      | 1753 709  | 0.34     | 0.5625248     | 1  | 0.96   | 0.83          | 1.10          | 0.92   | 0.70          | 1.22            |
| WHS      | 21   | 0.268 0.270 | 370 256 54/295 210 43       | 680 548   | 0.05     | 0.8264987     | 1  | 1.02   | 0.85          | 1.22          | 1.04   | 0.73          | 1.48            |
| PBCS 1+2 | 24   | 0.267 0.265 | 1219 869 167/579 403 80     | 2255 1062 | 0.00     | 0.9880766     | 1  | 1.00   | 0.89          | 1.12          | 1.00   | 0.79          | 1.26            |

Locus Alleles Chr Location Neighborhood  
rs3817198 T|C 11p15.5 1865582 LSP1

| SUBSET   | Rank | MAF         | Geno Counts                 | Subjects  | score X2 | score p-value | df | het OR | het OR 95% CI | het OR 95% CI | hom OR | hom OR 95% CI | hom OR 95% CI_u |
|----------|------|-------------|-----------------------------|-----------|----------|---------------|----|--------|---------------|---------------|--------|---------------|-----------------|
| STAGE1-3 | 17   | 0.324 0.335 | 4021 3887 916/2294 2211 606 | 8824 5111 | 3.59     | 0.0582505     | 1  | 1.05   | 1.00          | 1.11          | 1.11   | 1.00          | 1.23            |
| NHS      | 18   | 0.318 0.328 | 524 509 108/373 339 95      | 1141 807  | 0.37     | 0.5441547     | 1  | 1.04   | 0.91          | 1.20          | 1.09   | 0.83          | 1.43            |
| STAGE1-2 | 20   | 0.325 0.337 | 2407 2311 562/1564 1530 419 | 5280 3513 | 2.41     | 0.12048       | 1  | 1.05   | 0.99          | 1.12          | 1.11   | 0.97          | 1.26            |
| STAGE2   | 21   | 0.327 0.340 | 1883 1802 454/1191 1191 324 | 4139 2706 | 2.06     | 0.1513376     | 1  | 1.05   | 0.98          | 1.13          | 1.11   | 0.96          | 1.29            |
| CPSII    | 18   | 0.334 0.340 | 243 231 64/139 138 38       | 538 315   | 0.14     | 0.7107075     | 1  | 1.04   | 0.85          | 1.28          | 1.08   | 0.71          | 1.64            |
| PBCS1    | 22   | 0.319 0.326 | 229 228 47/161 150 39       | 504 350   | 0.01     | 0.9251499     | 1  | 1.01   | 0.82          | 1.25          | 1.02   | 0.67          | 1.56            |
| PLCO     | 19   | 0.335 0.334 | 440 417 118/190 215 42      | 975 447   | 0.12     | 0.7260342     | 1  | 0.97   | 0.82          | 1.15          | 0.94   | 0.67          | 1.32            |
| WHI      | 17   | 0.326 0.343 | 1097 1051 260/768 753 221   | 2408 1742 | 2.97     | 0.0847857     | 1  | 1.08   | 0.99          | 1.19          | 1.18   | 0.98          | 1.41            |
| STAGE3   | 8    | 0.322 0.331 | 1613 1577 354/727 682 187   | 3544 1596 | 0.76     | 0.3831107     | 1  | 1.04   | 0.95          | 1.14          | 1.08   | 0.90          | 1.30            |
| NHS2     | 17   | 0.317 0.324 | 518 491 109/160 145 39      | 1118 344  | 0.12     | 0.7258877     | 1  | 1.03   | 0.86          | 1.24          | 1.07   | 0.74          | 1.54            |
| PBCS2    | 23   | 0.330 0.330 | 789 789 189/326 301 84      | 1767 711  | 0.00     | 0.9695867     | 1  | 1.00   | 0.87          | 1.14          | 0.99   | 0.77          | 1.29            |
| WHS      | 4    | 0.310 0.336 | 306 297 56/241 236 64       | 659 541   | 1.82     | 0.1773251     | 1  | 1.13   | 0.95          | 1.34          | 1.27   | 0.90          | 1.80            |
| PBCS 1+2 | 23   | 0.328 0.327 | 1019 1016 236/490 450 123   | 2271 1063 | 0.00     | 0.9542654     | 1  | 1.00   | 0.90          | 1.12          | 1.01   | 0.81          | 1.26            |

Locus Alleles Chr Location Neighborhood  
rs998592 G|A 16p13.13 11107179 CLEC16A

| SUBSET   | Rank | MAF         | Geno Counts                  | Subjects  | score X2 | score p-value | df | het OR | het OR 95% l | het OR 95% t | hom OR | hom OR 95% | hom OR 95% CI_u |
|----------|------|-------------|------------------------------|-----------|----------|---------------|----|--------|--------------|--------------|--------|------------|-----------------|
| STAGE1-3 | 18   | 0.425 0.417 | 2956 4239 1625/1696 2557 852 | 8820 5105 | 3.28     | 0.070018      | 1  | 0.95   | 0.91         | 1.00         | 0.91   | 0.82       | 1.01            |
| NHS      | 21   | 0.424 0.429 | 405 502 232/253 415 139      | 1139 807  | 0.06     | 0.8083598     | 1  | 1.02   | 0.89         | 1.15         | 1.03   | 0.80       | 1.33            |
| STAGE1-2 | 18   | 0.436 0.424 | 1716 2524 1042/1133 1787 597 | 5282 3517 | 3.72     | 0.0537455     | 1  | 0.94   | 0.89         | 1.00         | 0.89   | 0.78       | 1.00            |
| STAGE2   | 14   | 0.440 0.422 | 1311 2022 810/880 1372 458   | 4143 2710 | 5.49     | 0.0191088     | 1  | 0.92   | 0.86         | 0.99         | 0.85   | 0.74       | 0.97            |
| CPSII    | 1    | 0.475 0.416 | 158 254 131/107 155 54       | 543 316   | 4.75     | 0.0292285     | 1  | 0.80   | 0.66         | 0.98         | 0.65   | 0.44       | 0.96            |
| PBCS1    | 6    | 0.415 0.368 | 186 220 100/141 164 48       | 506 353   | 3.74     | 0.053127      | 1  | 0.82   | 0.68         | 1.00         | 0.68   | 0.46       | 1.01            |
| PLCO     | 6    | 0.419 0.393 | 324 485 166/162 220 66       | 975 448   | 2.03     | 0.1545687     | 1  | 0.89   | 0.75         | 1.05         | 0.79   | 0.56       | 1.10            |
| WHI      | 21   | 0.450 0.444 | 729 1192 488/517 903 322     | 2409 1742 | 0.30     | 0.5814906     | 1  | 0.98   | 0.89         | 1.07         | 0.95   | 0.80       | 1.14            |
| STAGE3   | 18   | 0.407 0.403 | 1240 1715 584/563 771 255    | 3539 1589 | 0.27     | 0.6008725     | 1  | 0.98   | 0.90         | 1.07         | 0.95   | 0.80       | 1.14            |
| NHS2     | 19   | 0.417 0.425 | 378 542 193/115 159 64       | 1113 338  | 0.11     | 0.7455812     | 1  | 1.03   | 0.87         | 1.22         | 1.06   | 0.75       | 1.50            |
| PBCS2    | 8    | 0.400 0.386 | 625 849 274/266 333 105      | 1748 704  | 0.92     | 0.3375368     | 1  | 0.94   | 0.83         | 1.07         | 0.88   | 0.68       | 1.14            |
| WHS      | 23   | 0.412 0.412 | 237 324 117/182 279 86       | 678 547   | 0.00     | 0.9960146     | 1  | 1.00   | 0.85         | 1.18         | 1.00   | 0.72       | 1.39            |
| PBCS 1+2 | 6    | 0.403 0.380 | 811 1069 373/407 496 153     | 2253 1056 | 3.42     | 0.0643557     | 1  | 0.90   | 0.81         | 1.01         | 0.82   | 0.66       | 1.01            |

Locus Alleles Chr Location Neighborhood  
rs11077820 T|C 17q25.1 71966263 UBE2O, AANAT

| SUBSET   | Rank | MAF         | Geno Counts                  | Subjects  | score X2 | score p-value | df | het OR | het OR 95% l | het OR 95% t | hom OR | hom OR 95% | hom OR 95% CI_u |
|----------|------|-------------|------------------------------|-----------|----------|---------------|----|--------|--------------|--------------|--------|------------|-----------------|
| STAGE1-3 | 19   | 0.374 0.367 | 3426 4157 1207/2093 2255 738 | 8790 5086 | 2.23     | 0.1353384     | 1  | 0.96   | 0.91         | 1.01         | 0.93   | 0.84       | 1.02            |
| NHS      | 16   | 0.382 0.374 | 429 553 159/329 353 125      | 1141 807  | 0.54     | 0.4609043     | 1  | 0.95   | 0.83         | 1.09         | 0.91   | 0.70       | 1.18            |
| STAGE1-2 | 17   | 0.383 0.368 | 1953 2611 714/1447 1549 517  | 5278 3513 | 5.32     | 0.0211175     | 1  | 0.93   | 0.87         | 0.99         | 0.86   | 0.76       | 0.98            |
| STAGE2   | 16   | 0.383 0.366 | 1524 2058 555/1118 1196 392  | 4137 2706 | 4.93     | 0.0264525     | 1  | 0.92   | 0.86         | 0.99         | 0.85   | 0.73       | 0.98            |
| CPSII    | 13   | 0.377 0.359 | 216 242 83/131 143 42        | 541 316   | 0.55     | 0.4597807     | 1  | 0.93   | 0.76         | 1.13         | 0.86   | 0.57       | 1.29            |
| PBCS1    | 8    | 0.375 0.334 | 193 244 67/160 150 43        | 504 353   | 2.31     | 0.1285249     | 1  | 0.85   | 0.69         | 1.05         | 0.73   | 0.48       | 1.10            |
| PLCO     | 10   | 0.371 0.354 | 371 484 120/188 200 58       | 975 446   | 1.46     | 0.2268894     | 1  | 0.90   | 0.76         | 1.07         | 0.81   | 0.58       | 1.14            |
| WHI      | 20   | 0.385 0.378 | 871 1215 320/694 776 270     | 2406 1740 | 0.47     | 0.4934089     | 1  | 0.97   | 0.88         | 1.06         | 0.94   | 0.78       | 1.13            |
| STAGE3   | 14   | 0.361 0.365 | 1473 1545 494/646 707 221    | 3512 1574 | 0.48     | 0.4875169     | 1  | 1.03   | 0.95         | 1.13         | 1.06   | 0.89       | 1.27            |
| NHS2     | 16   | 0.364 0.373 | 446 495 150/133 153 48       | 1091 334  | 0.16     | 0.6916939     | 1  | 1.04   | 0.87         | 1.24         | 1.07   | 0.75       | 1.53            |
| PBCS2    | 5    | 0.359 0.382 | 732 784 238/269 335 102      | 1754 706  | 2.26     | 0.1328306     | 1  | 1.10   | 0.97         | 1.25         | 1.22   | 0.94       | 1.57            |
| WHS      | 12   | 0.358 0.338 | 295 266 106/244 219 71       | 667 534   | 0.74     | 0.3902401     | 1  | 0.93   | 0.79         | 1.09         | 0.87   | 0.63       | 1.20            |
| PBCS 1+2 | 17   | 0.362 0.366 | 925 1029 304/429 484 145     | 2258 1058 | 0.07     | 0.7982522     | 1  | 1.01   | 0.91         | 1.13         | 1.03   | 0.83       | 1.28            |

Locus Alleles Chr Location Neighborhood  
rs4666451 G|A 2p24.1 19150424

| SUBSET   | Rank | MAF         | Geno Counts                  | Subjects  | score X2 | score p-value | df | het OR | het OR 95% l | het OR 95% t | hom OR | hom OR 95% | hom OR 95% CI_u |
|----------|------|-------------|------------------------------|-----------|----------|---------------|----|--------|--------------|--------------|--------|------------|-----------------|
| STAGE1-3 | 20   | 0.395 0.385 | 2822 3643 1205/1621 2044 634 | 7670 4299 | 2.14     | 0.1436535     | 1  | 0.96   | 0.91         | 1.01         | 0.92   | 0.83       | 1.03            |
| STAGE1-2 | 19   | 0.398 0.383 | 1509 1968 666/1028 1286 396  | 4143 2710 | 3.38     | 0.0658163     | 1  | 0.94   | 0.87         | 1.01         | 0.88   | 0.76       | 1.01            |
| STAGE2   | 19   | 0.398 0.383 | 1509 1968 666/1028 1286 396  | 4143 2710 | 3.19     | 0.0740664     | 1  | 0.94   | 0.87         | 1.01         | 0.88   | 0.76       | 1.01            |
| CPSII    | 14   | 0.394 0.413 | 201 256 86/96 179 41         | 543 316   | 0.39     | 0.5317302     | 1  | 1.07   | 0.87         | 1.31         | 1.14   | 0.75       | 1.73            |
| PBCS1    | 9    | 0.409 0.375 | 176 246 84/140 161 52        | 506 353   | 2.04     | 0.1535444     | 1  | 0.86   | 0.71         | 1.06         | 0.75   | 0.50       | 1.12            |
| PLCO     | 22   | 0.393 0.394 | 355 474 146/170 203 75       | 975 448   | 0.01     | 0.9412591     | 1  | 0.99   | 0.84         | 1.17         | 0.99   | 0.71       | 1.37            |
| WHI      | 16   | 0.397 0.378 | 890 1125 394/672 822 248     | 2409 1742 | 2.97     | 0.0847368     | 1  | 0.92   | 0.85         | 1.01         | 0.85   | 0.72       | 1.02            |
| STAGE3   | 22   | 0.390 0.388 | 1315 1676 539/593 760 238    | 3530 1591 | 0.01     | 0.9083979     | 1  | 0.99   | 0.91         | 1.09         | 0.99   | 0.83       | 1.18            |
| NHS2     | 12   | 0.382 0.370 | 428 504 169/128 165 41       | 1101 334  | 0.34     | 0.5606154     | 1  | 0.95   | 0.79         | 1.13         | 0.90   | 0.63       | 1.28            |
| PBCS2    | 22   | 0.399 0.398 | 621 858 268/263 330 118      | 1747 711  | 0.00     | 0.9444778     | 1  | 1.00   | 0.88         | 1.13         | 0.99   | 0.77       | 1.28            |
| WHS      | 17   | 0.380 0.387 | 266 314 102/202 265 79       | 682 546   | 0.19     | 0.6626342     | 1  | 1.04   | 0.88         | 1.22         | 1.08   | 0.78       | 1.49            |
| PBCS 1+2 | 16   | 0.402 0.390 | 795 1103 352/403 489 170     | 2250 1062 | 0.71     | 0.3984513     | 1  | 0.96   | 0.86         | 1.06         | 0.91   | 0.74       | 1.13            |

Locus Alleles Chr Location Neighborhood  
rs7936636 C|T 11p11.2 44397546

| SUBSET | Rank | MAF | Geno Counts | Subjects | score X2 | score p-value | df | het OR | het OR 95% l | het OR 95% t | hom OR | hom OR 95% | hom OR 95% CI_u |
|--------|------|-----|-------------|----------|----------|---------------|----|--------|--------------|--------------|--------|------------|-----------------|
|--------|------|-----|-------------|----------|----------|---------------|----|--------|--------------|--------------|--------|------------|-----------------|

|          |    |             |                             |           |      |           |   |      |      |      |      |      |      |
|----------|----|-------------|-----------------------------|-----------|------|-----------|---|------|------|------|------|------|------|
| STAGE1-3 | 21 | 0.258 0.250 | 4826 3425 560/2885 1879 337 | 8811 5101 | 2.14 | 0.1437768 | 1 | 0.96 | 0.91 | 1.01 | 0.92 | 0.82 | 1.03 |
| NHS      | 17 | 0.256 0.247 | 634 430 77/470 276 61       | 1141 807  | 0.51 | 0.4761864 | 1 | 0.95 | 0.82 | 1.10 | 0.90 | 0.67 | 1.20 |
| STAGE1-2 | 16 | 0.263 0.247 | 2851 2086 344/2020 1258 238 | 5281 3516 | 5.55 | 0.0184979 | 1 | 0.92 | 0.86 | 0.99 | 0.85 | 0.74 | 0.97 |
| STAGE2   | 15 | 0.264 0.247 | 2217 1656 267/1550 982 177  | 4140 2709 | 5.34 | 0.0208858 | 1 | 0.91 | 0.84 | 0.99 | 0.83 | 0.71 | 0.97 |
| CPSII    | 2  | 0.266 0.222 | 286 224 32/197 98 21        | 542 316   | 4.52 | 0.0334055 | 1 | 0.78 | 0.61 | 0.98 | 0.60 | 0.38 | 0.96 |
| PBCS1    | 13 | 0.247 0.229 | 284 193 28/212 119 21       | 505 352   | 0.65 | 0.4198709 | 1 | 0.91 | 0.72 | 1.15 | 0.83 | 0.52 | 1.31 |
| PLCO     | 14 | 0.263 0.253 | 526 385 64/254 161 33       | 975 448   | 0.43 | 0.5123049 | 1 | 0.94 | 0.78 | 1.13 | 0.88 | 0.61 | 1.28 |
| WHI      | 12 | 0.270 0.249 | 1272 973 163/983 649 110    | 2408 1742 | 4.14 | 0.041914  | 1 | 0.90 | 0.81 | 1.00 | 0.81 | 0.66 | 0.99 |
| STAGE3   | 11 | 0.251 0.258 | 1975 1339 216/865 621 98    | 3530 1584 | 0.70 | 0.4027227 | 1 | 1.04 | 0.95 | 1.15 | 1.09 | 0.89 | 1.33 |
| NHS2     | 6  | 0.266 0.239 | 598 438 77/198 117 22       | 1113 337  | 2.00 | 0.1575201 | 1 | 0.87 | 0.71 | 1.06 | 0.75 | 0.50 | 1.12 |
| PBCS2    | 4  | 0.245 0.268 | 993 643 105/372 282 47      | 1741 701  | 2.59 | 0.1076509 | 1 | 1.12 | 0.97 | 1.30 | 1.26 | 0.95 | 1.68 |
| WHS      | 11 | 0.241 0.256 | 384 258 34/295 222 29       | 676 546   | 0.79 | 0.3750888 | 1 | 1.09 | 0.90 | 1.32 | 1.19 | 0.81 | 1.74 |
| PBCS 1+2 | 14 | 0.245 0.256 | 1277 836 133/584 401 69     | 2246 1054 | 0.87 | 0.3505172 | 1 | 1.06 | 0.94 | 1.19 | 1.12 | 0.88 | 1.43 |

Locus Alleles Chr Location Neighborhood  
rs7121523 G|A 11p15.4 7556781 PPFIBP2

| SUBSET   | Rank | MAF         | Geno Counts                 | Subjects  | score X2 | score p-value | df | het OR | het OR 95% l | het OR 95% t | hom OR | hom OR 95% l | hom OR 95% CI_u |
|----------|------|-------------|-----------------------------|-----------|----------|---------------|----|--------|--------------|--------------|--------|--------------|-----------------|
| STAGE1-3 | 22   | 0.156 0.160 | 6264 2378 185/3629 1305 166 | 8827 5100 | 0.90     | 0.3416449     | 1  | 1.03   | 0.97         | 1.11         | 1.07   | 0.93         | 1.22            |
| NHS      | 15   | 0.159 0.168 | 807 306 28/572 199 36       | 1141 807  | 0.64     | 0.4250899     | 1  | 1.07   | 0.90         | 1.27         | 1.15   | 0.82         | 1.61            |
| STAGE1-2 | 22   | 0.155 0.161 | 3739 1443 99/2508 881 126   | 5281 3515 | 0.83     | 0.3635641     | 1  | 1.04   | 0.96         | 1.13         | 1.08   | 0.91         | 1.27            |
| STAGE2   | 22   | 0.154 0.159 | 2932 1137 71/1936 682 90    | 4140 2708 | 0.36     | 0.5506145     | 1  | 1.03   | 0.94         | 1.13         | 1.06   | 0.88         | 1.28            |
| CPSII    | 22   | 0.173 0.171 | 368 161 13/220 84 12        | 542 316   | 0.06     | 0.8093686     | 1  | 0.97   | 0.74         | 1.26         | 0.94   | 0.55         | 1.59            |
| PBCS1    | 12   | 0.138 0.156 | 373 123 8/259 76 17         | 504 352   | 0.98     | 0.3225781     | 1  | 1.14   | 0.88         | 1.49         | 1.31   | 0.77         | 2.23            |
| PLCO     | 23   | 0.156 0.160 | 688 270 17/318 117 13       | 975 448   | 0.00     | 0.9907542     | 1  | 1.00   | 0.80         | 1.25         | 1.00   | 0.64         | 1.56            |
| WHI      | 23   | 0.154 0.157 | 1704 664 40/1244 446 51     | 2408 1741 | 0.12     | 0.7344614     | 1  | 1.02   | 0.90         | 1.15         | 1.04   | 0.82         | 1.33            |
| STAGE3   | 21   | 0.156 0.159 | 2525 935 85/1121 424 40     | 3545 1585 | 0.11     | 0.7413102     | 1  | 1.02   | 0.91         | 1.15         | 1.04   | 0.82         | 1.32            |
| NHS2     | 9    | 0.167 0.151 | 777 314 30/246 82 10        | 1121 338  | 0.93     | 0.3338694     | 1  | 0.89   | 0.70         | 1.13         | 0.79   | 0.49         | 1.27            |
| PBCS2    | 9    | 0.148 0.158 | 1266 440 38/496 184 18      | 1744 698  | 0.68     | 0.4103504     | 1  | 1.08   | 0.90         | 1.28         | 1.16   | 0.82         | 1.63            |
| WHS      | 15   | 0.158 0.166 | 482 181 17/379 158 12       | 680 549   | 0.25     | 0.6190722     | 1  | 1.06   | 0.85         | 1.32         | 1.12   | 0.72         | 1.73            |
| PBCS 1+2 | 10   | 0.146 0.157 | 1639 563 47/755 260 35      | 2249 1050 | 1.73     | 0.1887641     | 1  | 1.10   | 0.95         | 1.27         | 1.21   | 0.91         | 1.62            |

Locus Alleles Chr Location Neighborhood  
rs2391406 T|G 13q33.3 106586873

| SUBSET   | Rank | MAF         | Geno Counts                  | Subjects  | score X2 | score p-value | df | het OR | het OR 95% l | het OR 95% t | hom OR | hom OR 95% l | hom OR 95% CI_u |
|----------|------|-------------|------------------------------|-----------|----------|---------------|----|--------|--------------|--------------|--------|--------------|-----------------|
| STAGE1-3 | 23   | 0.372 0.367 | 3513 4015 1265/2027 2376 676 | 8793 5079 | 0.69     | 0.4056612     | 1  | 0.98   | 0.93         | 1.03         | 0.96   | 0.86         | 1.06            |
| NHS      | 20   | 0.371 0.366 | 452 529 159/323 377 107      | 1140 807  | 0.06     | 0.8078241     | 1  | 0.98   | 0.86         | 1.12         | 0.97   | 0.74         | 1.26            |
| STAGE1-2 | 21   | 0.375 0.364 | 2110 2378 788/1393 1684 438  | 5276 3515 | 2.05     | 0.152148      | 1  | 0.96   | 0.90         | 1.02         | 0.91   | 0.80         | 1.03            |
| STAGE2   | 20   | 0.376 0.364 | 1658 1849 629/1070 1307 331  | 4136 2708 | 2.24     | 0.1343299     | 1  | 0.95   | 0.88         | 1.02         | 0.90   | 0.78         | 1.03            |
| CPSII    | 4    | 0.371 0.339 | 217 240 79/132 150 31        | 536 313   | 2.18     | 0.1400548     | 1  | 0.85   | 0.69         | 1.05         | 0.73   | 0.48         | 1.11            |
| PBCS1    | 17   | 0.387 0.375 | 195 230 81/125 190 37        | 506 352   | 0.30     | 0.5814294     | 1  | 0.94   | 0.77         | 1.16         | 0.89   | 0.59         | 1.34            |
| PLCO     | 12   | 0.376 0.360 | 398 416 157/180 213 55       | 971 448   | 0.83     | 0.3609388     | 1  | 0.93   | 0.79         | 1.09         | 0.86   | 0.62         | 1.19            |
| WHI      | 19   | 0.372 0.365 | 971 1084 353/693 828 221     | 2408 1742 | 0.47     | 0.493347      | 1  | 0.97   | 0.89         | 1.06         | 0.94   | 0.78         | 1.12            |
| STAGE3   | 19   | 0.369 0.373 | 1403 1641 477/634 693 238    | 3521 1565 | 0.25     | 0.6186358     | 1  | 1.02   | 0.94         | 1.12         | 1.05   | 0.88         | 1.25            |
| NHS2     | 1    | 0.341 0.392 | 493 477 140/129 154 56       | 1110 339  | 6.01     | 0.0142566     | 1  | 1.24   | 1.04         | 1.48         | 1.54   | 1.09         | 2.19            |
| PBCS2    | 20   | 0.380 0.381 | 656 853 236/275 321 108      | 1745 704  | 0.04     | 0.8490082     | 1  | 1.01   | 0.89         | 1.15         | 1.03   | 0.79         | 1.33            |
| WHS      | 3    | 0.385 0.351 | 254 311 101/230 218 74       | 666 522   | 2.72     | 0.0988874     | 1  | 0.87   | 0.74         | 1.03         | 0.76   | 0.54         | 1.05            |
| PBCS 1+2 | 21   | 0.381 0.379 | 851 1079 317/400 510 145     | 2247 1055 | 0.01     | 0.9162836     | 1  | 0.99   | 0.89         | 1.11         | 0.99   | 0.80         | 1.23            |

Locus Alleles Chr Location Neighborhood  
rs17740709 A|G 12q21.31 81947471 TMTC2

| SUBSET | Rank | MAF | Geno Counts | Subjects | score X2 | score p-value | df | het OR | het OR 95% l | het OR 95% t | hom OR | hom OR 95% l | hom OR 95% CI_u |
|--------|------|-----|-------------|----------|----------|---------------|----|--------|--------------|--------------|--------|--------------|-----------------|
|--------|------|-----|-------------|----------|----------|---------------|----|--------|--------------|--------------|--------|--------------|-----------------|

|          |    |             |                             |           |      |           |   |      |      |      |      |      |      |
|----------|----|-------------|-----------------------------|-----------|------|-----------|---|------|------|------|------|------|------|
| STAGE1-3 | 24 | 0.219 0.220 | 5354 3028 417 3142 1658 292 | 8799 5092 | 0.16 | 0.6896561 | 1 | 1.01 | 0.95 | 1.07 | 1.02 | 0.91 | 1.15 |
| NHS      | 19 | 0.218 0.222 | 691 402 48 502 251 54       | 1141 807  | 0.18 | 0.6740173 | 1 | 1.03 | 0.89 | 1.20 | 1.07 | 0.79 | 1.45 |
| STAGE1-2 | 23 | 0.218 0.217 | 3200 1869 215 2194 1121 202 | 5284 3517 | 0.01 | 0.9405648 | 1 | 1.00 | 0.93 | 1.07 | 0.99 | 0.86 | 1.15 |
| STAGE2   | 23 | 0.217 0.215 | 2509 1467 167 1692 870 148  | 4143 2710 | 0.09 | 0.7645887 | 1 | 0.99 | 0.91 | 1.07 | 0.97 | 0.82 | 1.15 |
| CPSII    | 9  | 0.215 0.199 | 328 197 18 205 96 15        | 543 316   | 1.01 | 0.3140617 | 1 | 0.88 | 0.68 | 1.13 | 0.77 | 0.47 | 1.28 |
| PBCS1    | 18 | 0.242 0.245 | 282 203 21 203 127 23       | 506 353   | 0.05 | 0.8206527 | 1 | 1.03 | 0.81 | 1.30 | 1.06 | 0.66 | 1.68 |
| PLCO     | 21 | 0.214 0.218 | 603 326 46 277 147 24       | 975 448   | 0.02 | 0.8813931 | 1 | 1.01 | 0.84 | 1.23 | 1.03 | 0.70 | 1.51 |
| WHI      | 22 | 0.215 0.210 | 1466 851 92 1105 544 93     | 2409 1742 | 0.30 | 0.5833079 | 1 | 0.97 | 0.87 | 1.08 | 0.94 | 0.76 | 1.17 |
| STAGE3   | 7  | 0.222 0.228 | 2154 1160 202 948 539 90    | 3516 1577 | 0.92 | 0.3385281 | 1 | 1.05 | 0.95 | 1.16 | 1.10 | 0.90 | 1.35 |
| NHS2     | 21 | 0.210 0.212 | 694 349 56 207 109 16       | 1099 332  | 0.02 | 0.8938798 | 1 | 1.01 | 0.82 | 1.25 | 1.03 | 0.68 | 1.56 |
| PBCS2    | 3  | 0.234 0.254 | 1042 597 112 398 260 50     | 1751 708  | 2.63 | 0.1050702 | 1 | 1.12 | 0.98 | 1.29 | 1.26 | 0.95 | 1.67 |
| WHS      | 16 | 0.212 0.203 | 418 214 34 343 170 24       | 666 537   | 0.21 | 0.6494604 | 1 | 0.96 | 0.79 | 1.16 | 0.91 | 0.62 | 1.35 |
| PBCS 1+2 | 11 | 0.236 0.251 | 1324 799 133 601 385 73     | 2256 1059 | 1.67 | 0.1960106 | 1 | 1.08 | 0.96 | 1.22 | 1.17 | 0.92 | 1.49 |

#### adj\_rec

| Locus      | Alleles | Chr         | Location                     | Neighborhood        |          |               |    |        |            |            |      |  |  |
|------------|---------|-------------|------------------------------|---------------------|----------|---------------|----|--------|------------|------------|------|--|--|
| rs11249433 | T C     | 1p11.2      |                              | 120982136 LOC647121 |          |               |    |        |            |            |      |  |  |
| SUBSET     | Rank    | MAF         | Geno Counts                  | Subjects            | score X2 | score p-value | df | hom OR | hom OR 95% | hom OR 95% | CI_u |  |  |
| STAGE1-3   | 1       | 0.395 0.441 | 3255 4114 1412 1590 2476 993 | 8781 5059           | 25.42    | 4.609E-07     | 1  | 1.26   | 1.15       | 1.38       |      |  |  |
| NHS        | 5       | 0.388 0.448 | 425 540 170 238 411 155      | 1135 804            | 5.89     | 0.0152437     | 1  | 1.35   | 1.06       | 1.71       |      |  |  |
| STAGE1-2   | 11      | 0.403 0.443 | 1899 2491 874 1070 1756 674  | 5264 3500           | 9.58     | 0.0019688     | 1  | 1.19   | 1.07       | 1.33       |      |  |  |
| STAGE2     | 14      | 0.407 0.442 | 1474 1951 704 832 1345 519   | 4129 2696           | 4.99     | 0.025438      | 1  | 1.15   | 1.02       | 1.31       |      |  |  |
| CPSII      | 19      | 0.378 0.405 | 220 235 88 108 159 48        | 543 315             | 0.15     | 0.6997681     | 1  | 0.93   | 0.63       | 1.37       |      |  |  |
| PBCS1      | 20      | 0.387 0.407 | 195 230 81 124 171 58        | 506 353             | 0.01     | 0.9276637     | 1  | 0.98   | 0.68       | 1.43       |      |  |  |
| PLCO       | 18      | 0.420 0.427 | 324 476 169 140 232 75       | 969 447             | 0.08     | 0.7827011     | 1  | 0.96   | 0.71       | 1.30       |      |  |  |
| WHI        | 6       | 0.407 0.455 | 857 1133 411 514 857 359     | 2401 1730           | 9.05     | 0.0026253     | 1  | 1.27   | 1.09       | 1.49       |      |  |  |
| STAGE3     | 1       | 0.383 0.436 | 1360 1625 538 520 720 319    | 3523 1559           | 17.67    | 0.00002622    | 1  | 1.40   | 1.20       | 1.64       |      |  |  |
| NHS2       | 1       | 0.395 0.446 | 418 522 182 107 147 72       | 1122 326            | 6.04     | 0.0139987     | 1  | 1.47   | 1.08       | 1.99       |      |  |  |
| PBCS2      | 1       | 0.362 0.410 | 719 778 240 246 324 121      | 1737 691            | 5.50     | 0.0190383     | 1  | 1.33   | 1.05       | 1.70       |      |  |  |
| WHS        | 1       | 0.419 0.462 | 223 325 116 167 249 126      | 664 542             | 6.40     | 0.0114006     | 1  | 1.44   | 1.08       | 1.91       |      |  |  |
| PBCS 1+2   | 2       | 0.368 0.409 | 910 1006 321 370 495 179     | 2237 1044           | 4.04     | 0.0445084     | 1  | 1.23   | 1.00       | 1.50       |      |  |  |

| Locus    | Alleles | Chr         | Location                    | Neighborhood     |          |               |    |        |            |            |      |  |  |
|----------|---------|-------------|-----------------------------|------------------|----------|---------------|----|--------|------------|------------|------|--|--|
| rs999737 | C T     | 14q24.1     |                             | 68104435 RAD51L1 |          |               |    |        |            |            |      |  |  |
| SUBSET   | Rank    | MAF         | Geno Counts                 | Subjects         | score X2 | score p-value | df | hom OR | hom OR 95% | hom OR 95% | CI_u |  |  |
| STAGE1-3 | 2       | 0.238 0.215 | 5166 3096 548 3130 1743 227 | 8810 5100        | 18.22    | 0.00001963    | 1  | 0.71   | 0.60       | 0.83       |      |  |  |
| NHS      | 1       | 0.244 0.209 | 660 405 76 499 278 30       | 1141 807         | 8.04     | 0.0045657     | 1  | 0.54   | 0.35       | 0.83       |      |  |  |
| STAGE1-2 | 7       | 0.239 0.211 | 3092 1862 330 2185 1182 150 | 5284 3517        | 15.94    | 0.00006544    | 1  | 0.67   | 0.55       | 0.82       |      |  |  |
| STAGE2   | 9       | 0.237 0.211 | 2432 1457 254 1686 904 120  | 4143 2710        | 8.99     | 0.0027175     | 1  | 0.71   | 0.57       | 0.89       |      |  |  |
| CPSII    | 22      | 0.235 0.223 | 319 193 31 193 105 18       | 543 316          | 0.01     | 0.9120954     | 1  | 0.97   | 0.53       | 1.77       |      |  |  |
| PBCS1    | 2       | 0.242 0.203 | 291 185 30 219 125 9        | 506 353          | 5.91     | 0.0150918     | 1  | 0.40   | 0.19       | 0.86       |      |  |  |
| PLCO     | 1       | 0.238 0.225 | 576 334 65 262 170 16       | 975 448          | 5.54     | 1.85E-02      | 1  | 0.51   | 0.29       | 0.90       |      |  |  |
| WHI      | 16      | 0.235 0.208 | 1416 854 139 1100 559 83    | 2409 1742        | 2.09     | 0.1480146     | 1  | 0.81   | 0.61       | 1.08       |      |  |  |
| STAGE3   | 4       | 0.237 0.226 | 2075 1237 218 946 562 77    | 3530 1585        | 2.89     | 0.0893229     | 1  | 0.79   | 0.60       | 1.04       |      |  |  |
| NHS2     | 14      | 0.234 0.233 | 664 362 77 198 115 20       | 1103 333         | 0.37     | 0.5436062     | 1  | 0.85   | 0.51       | 1.42       |      |  |  |
| PBCS2    | 15      | 0.236 0.224 | 1016 637 94 422 248 34      | 1747 704         | 0.20     | 0.6557827     | 1  | 0.91   | 0.61       | 1.37       |      |  |  |
| WHS      | 2       | 0.244 0.224 | 395 238 47 326 199 23       | 680 548          | 3.94     | 0.0472148     | 1  | 0.60   | 0.36       | 1.00       |      |  |  |
| PBCS 1+2 | 4       | 0.237 0.217 | 1306 819 124 640 372 43     | 2249 1055        | 2.72     | 0.0993975     | 1  | 0.74   | 0.52       | 1.06       |      |  |  |

| Locus     | Alleles | Chr     | Location | Neighborhood       |
|-----------|---------|---------|----------|--------------------|
| rs9491859 | C A     | 6q22.33 |          | 128106056 C6orf190 |

| SUBSET   | Rank | MAF         | Geno Counts                  | Subjects  | score X2 | score p-value | df | hom OR | hom OR 95% | hom OR 95% CI_u |
|----------|------|-------------|------------------------------|-----------|----------|---------------|----|--------|------------|-----------------|
| STAGE1-3 | 3    | 0.352 0.377 | 3704 4014 1097 2017 2314 764 | 8815 5095 | 17.49    | 0.00002891    | 1  | 1.24   | 1.12       | 1.37            |
| NHS      | 6    | 0.356 0.375 | 459 551 130 325 359 123      | 1140 807  | 5.49     | 0.0191713     | 1  | 1.37   | 1.05       | 1.79            |
| STAGE1-2 | 4    | 0.348 0.377 | 2226 2432 625 1401 1579 536  | 5283 3516 | 19.55    | 0.000009775   | 1  | 1.33   | 1.17       | 1.50            |
| STAGE2   | 5    | 0.346 0.378 | 1767 1881 495 1076 1220 413  | 4143 2709 | 13.98    | 0.0001852     | 1  | 1.31   | 1.14       | 1.51            |
| CPSII    | 7    | 0.350 0.351 | 220 266 57 137 136 43        | 543 316   | 1.61     | 0.2038273     | 1  | 1.32   | 0.86       | 2.02            |
| PBCS1    | 13   | 0.345 0.364 | 216 231 59 147 154 51        | 506 352   | 1.05     | 0.3065109     | 1  | 1.24   | 0.82       | 1.86            |
| PLCO     | 14   | 0.333 0.376 | 437 427 111 170 219 59       | 975 448   | 0.50     | 0.4788214     | 1  | 1.13   | 0.80       | 1.60            |
| WHI      | 4    | 0.351 0.384 | 1018 1093 298 682 781 279    | 2409 1742 | 11.44    | 0.0007188     | 1  | 1.36   | 1.14       | 1.62            |
| STAGE3   | 10   | 0.358 0.377 | 1479 1586 472 617 735 228    | 3537 1580 | 1.06     | 0.3022532     | 1  | 1.10   | 0.92       | 1.30            |
| NHS2     | 18   | 0.368 0.371 | 459 501 163 139 147 52       | 1123 338  | 0.15     | 0.6967557     | 1  | 1.07   | 0.76       | 1.50            |
| PBCS2    | 8    | 0.349 0.365 | 744 779 218 286 322 96       | 1741 704  | 0.51     | 0.4772465     | 1  | 1.10   | 0.85       | 1.42            |
| WHS      | 12   | 0.363 0.396 | 276 306 91 192 266 80        | 673 538   | 0.63     | 0.4285281     | 1  | 1.14   | 0.82       | 1.58            |
| PBCS 1+2 | 6    | 0.348 0.365 | 959 1006 277 432 476 147     | 2242 1055 | 1.68     | 0.1954901     | 1  | 1.15   | 0.93       | 1.43            |

Locus Alleles Chr Location Neighborhood  
rs7121523 G|A 11p15.4 7556781 PPFIBP2

| SUBSET   | Rank | MAF         | Geno Counts                 | Subjects  | score X2 | score p-value | df | hom OR | hom OR 95% | hom OR 95% CI_u |
|----------|------|-------------|-----------------------------|-----------|----------|---------------|----|--------|------------|-----------------|
| STAGE1-3 | 4    | 0.156 0.160 | 6264 2378 185 3629 1305 166 | 8827 5100 | 17.47    | 0.00002914    | 1  | 1.58   | 1.27       | 1.96            |
| NHS      | 4    | 0.159 0.168 | 807 306 28 572 199 36       | 1141 807  | 6.13     | 0.0133201     | 1  | 1.87   | 1.13       | 3.11            |
| STAGE1-2 | 2    | 0.155 0.161 | 3739 1443 99 2508 881 126   | 5281 3515 | 23.99    | 9.675E-07     | 1  | 1.93   | 1.48       | 2.53            |
| STAGE2   | 4    | 0.154 0.159 | 2932 1137 71 1936 682 90    | 4140 2708 | 17.95    | 0.00002273    | 1  | 1.96   | 1.43       | 2.70            |
| CPSII    | 6    | 0.173 0.171 | 368 161 13 220 84 12        | 542 316   | 1.65     | 0.1988589     | 1  | 1.68   | 0.75       | 3.76            |
| PBCS1    | 1    | 0.138 0.156 | 373 123 8 259 76 17         | 504 352   | 8.57     | 0.0034177     | 1  | 3.39   | 1.43       | 8.01            |
| PLCO     | 9    | 0.156 0.160 | 688 270 17 318 117 13       | 975 448   | 1.30     | 0.2538864     | 1  | 1.54   | 0.73       | 3.24            |
| WHI      | 8    | 0.154 0.157 | 1704 664 40 1244 446 51     | 2408 1741 | 7.63     | 0.0057469     | 1  | 1.79   | 1.18       | 2.73            |
| STAGE3   | 18   | 0.156 0.159 | 2525 935 85 1121 424 40     | 3545 1585 | 0.15     | 0.7016361     | 1  | 1.08   | 0.73       | 1.59            |
| NHS2     | 21   | 0.167 0.151 | 777 314 30 246 82 10        | 1121 338  | 0.07     | 0.786355      | 1  | 1.11   | 0.53       | 2.29            |
| PBCS2    | 11   | 0.148 0.158 | 1266 440 38 496 184 18      | 1744 698  | 0.44     | 0.5073133     | 1  | 1.21   | 0.68       | 2.15            |
| WHS      | 20   | 0.158 0.166 | 482 181 17 379 158 12       | 680 549   | 0.07     | 0.7943591     | 1  | 0.90   | 0.43       | 1.92            |
| PBCS 1+2 | 1    | 0.146 0.157 | 1639 563 47 755 260 35      | 2249 1050 | 4.34     | 0.0371335     | 1  | 1.60   | 1.02       | 2.51            |

Locus Alleles Chr Location Neighborhood  
rs2067980 A|G 5p12 45018074

| SUBSET   | Rank | MAF         | Geno Counts                 | Subjects  | score X2 | score p-value | df | hom OR | hom OR 95% | hom OR 95% CI_u |
|----------|------|-------------|-----------------------------|-----------|----------|---------------|----|--------|------------|-----------------|
| STAGE1-3 | 5    | 0.160 0.176 | 6228 2348 240 3497 1411 190 | 8816 5098 | 14.31    | 0.0001549     | 1  | 1.46   | 1.20       | 1.78            |
| NHS      | 7    | 0.151 0.179 | 814 310 17 542 240 24       | 1141 806  | 5.08     | 0.024239      | 1  | 2.04   | 1.08       | 3.82            |
| STAGE1-2 | 3    | 0.150 0.175 | 3805 1374 105 2412 975 129  | 5284 3516 | 23.48    | 0.000001262   | 1  | 1.90   | 1.46       | 2.47            |
| STAGE2   | 3    | 0.150 0.174 | 2991 1064 88 1870 735 105   | 4143 2710 | 18.36    | 0.00001832    | 1  | 1.87   | 1.40       | 2.50            |
| CPSII    | 9    | 0.159 0.171 | 383 147 13 221 82 13        | 543 316   | 1.20     | 0.2728025     | 1  | 1.55   | 0.70       | 3.43            |
| PBCS1    | 16   | 0.191 0.231 | 335 149 22 208 127 18       | 506 353   | 0.41     | 0.5195201     | 1  | 1.24   | 0.65       | 2.36            |
| PLCO     | 8    | 0.144 0.156 | 714 241 20 322 112 14       | 975 448   | 1.46     | 0.2274646     | 1  | 1.53   | 0.76       | 3.09            |
| WHI      | 2    | 0.143 0.170 | 1761 606 42 1216 460 66     | 2409 1742 | 16.64    | 0.00004529    | 1  | 2.22   | 1.50       | 3.29            |
| STAGE3   | 19   | 0.176 0.177 | 2423 975 135 1085 437 61    | 3533 1583 | 0.10     | 0.7475362     | 1  | 1.05   | 0.77       | 1.44            |
| NHS2     | 19   | 0.169 0.161 | 777 292 42 240 79 14        | 1111 333  | 0.13     | 0.720686      | 1  | 1.12   | 0.60       | 2.08            |
| PBCS2    | 17   | 0.190 0.188 | 1158 519 73 467 211 27      | 1750 705  | 0.09     | 0.7596205     | 1  | 0.93   | 0.59       | 1.47            |
| WHS      | 16   | 0.152 0.172 | 488 164 20 378 147 20       | 672 545   | 0.46     | 0.4954853     | 1  | 1.25   | 0.66       | 2.34            |
| PBCS 1+2 | 23   | 0.190 0.202 | 1493 667 95 675 337 45      | 2255 1057 | 0.00     | 0.9978446     | 1  | 1.00   | 0.69       | 1.44            |

Locus Alleles Chr Location Neighborhood  
rs7716600 C|A 5p12 44910762

| SUBSET   | Rank | MAF         | Geno Counts                 | Subjects  | score X2 | score p-value | df | hom OR | hom OR 95% | hom OR 95% CI_u |
|----------|------|-------------|-----------------------------|-----------|----------|---------------|----|--------|------------|-----------------|
| STAGE1-3 | 6    | 0.220 0.243 | 5382 3016 434/2950 1835 322 | 8832 5107 | 11.53    | 0.000684      | 1  | 1.29   | 1.11       | 1.51            |
| NHS      | 2    | 0.215 0.253 | 693 401 44/451 303 53       | 1138 807  | 7.34     | 0.0067368     | 1  | 1.76   | 1.16       | 2.65            |
| STAGE1-2 | 1    | 0.216 0.248 | 3227 1822 226/2015 1256 243 | 5275 3514 | 27.39    | 1.659E-07     | 1  | 1.64   | 1.36       | 1.98            |
| STAGE2   | 1    | 0.216 0.246 | 2534 1421 182/1564 953 190  | 4137 2707 | 20.21    | 0.000006939   | 1  | 1.62   | 1.31       | 2.00            |
| CPSII    | 10   | 0.225 0.241 | 325 192 26/186 108 22       | 543 316   | 0.99     | 0.3200624     | 1  | 1.35   | 0.75       | 2.44            |
| PBCS1    | 6    | 0.217 0.272 | 308 173 23/186 139 26       | 504 351   | 3.16     | 0.0756691     | 1  | 1.69   | 0.94       | 3.05            |
| PLCO     | 11   | 0.223 0.232 | 577 359 37/261 166 21       | 973 448   | 0.81     | 0.3682391     | 1  | 1.29   | 0.74       | 2.24            |
| WHI      | 3    | 0.212 0.248 | 1499 797 111/1010 600 131   | 2407 1741 | 15.34    | 0.00008976    | 1  | 1.68   | 1.29       | 2.18            |
| STAGE3   | 6    | 0.226 0.231 | 2155 1196 208/936 581 78    | 3559 1595 | 1.79     | 0.1808987     | 1  | 0.83   | 0.63       | 1.09            |
| NHS2     | 7    | 0.229 0.230 | 676 383 66/198 126 15       | 1125 339  | 1.04     | 0.3078596     | 1  | 0.74   | 0.42       | 1.32            |
| PBCS2    | 22   | 0.223 0.233 | 1070 586 98/417 254 38      | 1754 709  | 0.01     | 0.909291      | 1  | 0.98   | 0.66       | 1.44            |
| WHS      | 5    | 0.232 0.229 | 409 227 44/321 201 25       | 680 547   | 1.97     | 0.1606709     | 1  | 0.70   | 0.42       | 1.16            |
| PBCS 1+2 | 13   | 0.221 0.246 | 1378 757 121/602 391 65     | 2256 1058 | 0.77     | 0.3791682     | 1  | 1.15   | 0.84       | 1.57            |

Locus Alleles Chr Location Neighborhood  
rs4415084 C|T 5p12 44698272

| SUBSET   | Rank | MAF         | Geno Counts                  | Subjects  | score X2 | score p-value | df | hom OR | hom OR 95% | hom OR 95% CI_u |
|----------|------|-------------|------------------------------|-----------|----------|---------------|----|--------|------------|-----------------|
| STAGE1-3 | 7    | 0.407 0.431 | 3135 4180 1492/1673 2433 970 | 8807 5076 | 10.85    | 0.0009888     | 1  | 1.16   | 1.06       | 1.27            |
| NHS      | 19   | 0.392 0.437 | 429 513 185/240 421 139      | 1127 800  | 0.29     | 0.5903472     | 1  | 1.07   | 0.84       | 1.36            |
| STAGE1-2 | 12   | 0.401 0.429 | 1895 2517 857/1154 1698 657  | 5269 3509 | 8.85     | 0.0029361     | 1  | 1.19   | 1.06       | 1.33            |
| STAGE2   | 8    | 0.404 0.427 | 1466 2004 672/914 1277 518   | 4142 2709 | 9.40     | 0.002172      | 1  | 1.22   | 1.07       | 1.39            |
| CPSII    | 11   | 0.427 0.389 | 178 265 99/121 144 51        | 542 316   | 0.92     | 0.3374749     | 1  | 0.83   | 0.57       | 1.21            |
| PBCS1    | 12   | 0.410 0.463 | 174 249 83/97 185 71         | 506 353   | 1.35     | 0.2455267     | 1  | 1.23   | 0.86       | 1.76            |
| PLCO     | 13   | 0.408 0.407 | 339 475 160/163 205 80       | 974 448   | 0.51     | 0.4736043     | 1  | 1.12   | 0.83       | 1.51            |
| WHI      | 7    | 0.400 0.429 | 866 1158 385/588 813 340     | 2409 1741 | 9.04     | 0.0026388     | 1  | 1.28   | 1.09       | 1.51            |
| STAGE3   | 3    | 0.415 0.435 | 1240 1666 636/520 739 315    | 3542 1574 | 3.08     | 0.0793322     | 1  | 1.15   | 0.98       | 1.34            |
| NHS2     | 3    | 0.402 0.449 | 413 517 193/105 156 71       | 1123 332  | 2.98     | 0.0844234     | 1  | 1.31   | 0.96       | 1.77            |
| PBCS2    | 13   | 0.424 0.440 | 593 833 328/226 346 140      | 1754 712  | 0.31     | 0.5766255     | 1  | 1.07   | 0.85       | 1.33            |
| WHS      | 8    | 0.411 0.420 | 234 316 115/189 237 104      | 665 530   | 1.05     | 0.3065446     | 1  | 1.17   | 0.87       | 1.57            |
| PBCS 1+2 | 9    | 0.421 0.447 | 767 1079 410/322 527 209     | 2256 1058 | 1.25     | 0.2628642     | 1  | 1.11   | 0.92       | 1.34            |

Locus Alleles Chr Location Neighborhood  
rs998592 G|A 16p13.13 11107179 CLEC16A

| SUBSET   | Rank | MAF         | Geno Counts                  | Subjects  | score X2 | score p-value | df | hom OR | hom OR 95% | hom OR 95% CI_u |
|----------|------|-------------|------------------------------|-----------|----------|---------------|----|--------|------------|-----------------|
| STAGE1-3 | 8    | 0.425 0.417 | 2956 4239 1625/1696 2557 852 | 8820 5105 | 9.29     | 0.0023046     | 1  | 0.87   | 0.79       | 0.95            |
| NHS      | 10   | 0.424 0.429 | 405 502 232/253 415 139      | 1139 807  | 3.16     | 0.0754461     | 1  | 0.81   | 0.64       | 1.02            |
| STAGE1-2 | 9    | 0.436 0.424 | 1716 2524 1042/1133 1787 597 | 5282 3517 | 11.90    | 0.0005604     | 1  | 0.82   | 0.74       | 0.92            |
| STAGE2   | 10   | 0.440 0.422 | 1311 2022 810/880 1372 458   | 4143 2710 | 8.78     | 0.0030465     | 1  | 0.83   | 0.73       | 0.94            |
| CPSII    | 2    | 0.475 0.416 | 158 254 131/107 155 54       | 543 316   | 5.00     | 0.0253117     | 1  | 0.67   | 0.47       | 0.95            |
| PBCS1    | 4    | 0.415 0.368 | 186 220 100/141 164 48       | 506 353   | 4.64     | 0.0311942     | 1  | 0.66   | 0.45       | 0.96            |
| PLCO     | 10   | 0.419 0.393 | 324 485 166/162 220 66       | 975 448   | 1.22     | 0.2695816     | 1  | 0.84   | 0.61       | 1.15            |
| WHI      | 17   | 0.450 0.444 | 729 1192 488/517 903 322     | 2409 1742 | 2.07     | 0.1506186     | 1  | 0.89   | 0.76       | 1.04            |
| STAGE3   | 16   | 0.407 0.403 | 1240 1715 584/563 771 255    | 3539 1589 | 0.19     | 0.665581      | 1  | 0.96   | 0.82       | 1.14            |
| NHS2     | 12   | 0.417 0.425 | 378 542 193/115 159 64       | 1113 338  | 0.40     | 0.5253727     | 1  | 1.11   | 0.81       | 1.52            |
| PBCS2    | 14   | 0.400 0.386 | 625 849 274/266 333 105      | 1748 704  | 0.25     | 0.6146051     | 1  | 0.94   | 0.73       | 1.20            |
| WHS      | 15   | 0.412 0.412 | 237 324 117/182 279 86       | 678 547   | 0.49     | 0.4828742     | 1  | 0.90   | 0.66       | 1.22            |
| PBCS 1+2 | 3    | 0.403 0.380 | 811 1069 373/407 496 153     | 2253 1056 | 2.88     | 0.0897618     | 1  | 0.84   | 0.68       | 1.03            |

Locus Alleles Chr Location Neighborhood  
rs37936 A|G 7q21.11 79806994

| SUBSET   | Rank | MAF         | Geno Counts                  | Subjects  | score X2 | score p-value | df | hom OR | hom OR 95% | hom OR 95% CI_u |
|----------|------|-------------|------------------------------|-----------|----------|---------------|----|--------|------------|-----------------|
| STAGE1-3 | 9    | 0.384 0.367 | 3358 3974 1348/2015 2294 686 | 8680 4995 | 9.28     | 0.0023188     | 1  | 0.86   | 0.77       | 0.95            |
| NHS      | 16   | 0.399 0.362 | 403 541 177/333 343 115      | 1121 791  | 0.79     | 0.3750074     | 1  | 0.89   | 0.69       | 1.15            |
| STAGE1-2 | 5    | 0.400 0.362 | 1731 2149 796/1268 1397 418  | 4676 3083 | 17.89    | 0.00002344    | 1  | 0.76   | 0.67       | 0.86            |
| STAGE2   | 2    | 0.400 0.362 | 1328 1608 619/935 1054 303   | 3555 2292 | 19.05    | 0.00001271    | 1  | 0.72   | 0.62       | 0.83            |
| CPSII    | 16   | 0.387 0.355 | 199 251 79/131 139 41        | 529 311   | 0.38     | 0.5355394     | 1  | 0.88   | 0.58       | 1.32            |
| PLCO     | 20   | 0.378 0.372 | 379 431 146/181 186 69       | 956 436   | 0.02     | 0.8980318     | 1  | 1.02   | 0.74       | 1.40            |
| WHI      | 1    | 0.409 0.362 | 857 1064 430/680 800 212     | 2351 1692 | 24.50    | 7.412E-07     | 1  | 0.64   | 0.53       | 0.76            |
| STAGE3   | 24   | 0.366 0.374 | 1434 1610 490/618 750 218    | 3534 1586 | 0.00     | 0.9844861     | 1  | 1.00   | 0.84       | 1.19            |
| NHS2     | 6    | 0.366 0.404 | 457 508 157/122 166 56       | 1122 344  | 1.10     | 0.2932797     | 1  | 1.20   | 0.86       | 1.67            |
| PBCS2    | 3    | 0.368 0.360 | 706 782 248/283 324 88       | 1736 695  | 1.46     | 0.2265836     | 1  | 0.85   | 0.65       | 1.11            |
| WHS      | 17   | 0.362 0.373 | 271 320 85/213 260 74        | 676 547   | 0.29     | 0.5905716     | 1  | 1.10   | 0.78       | 1.53            |
| PBCS 1+2 | 16   | 0.367 0.366 | 899 997 310/412 471 138      | 2206 1021 | 0.29     | 0.5885665     | 1  | 0.94   | 0.76       | 1.17            |

Locus rs12608723 Alleles A|G Chr 19q13.11 Location Neighborhood 38508973

| SUBSET   | Rank | MAF         | Geno Counts                | Subjects  | score X2 | score p-value | df | hom OR | hom OR 95% | hom OR 95% CI_u |
|----------|------|-------------|----------------------------|-----------|----------|---------------|----|--------|------------|-----------------|
| STAGE1-3 | 10   | 0.136 0.121 | 6618 2036 188/3939 1089 75 | 8842 5103 | 8.48     | 0.0035902     | 1  | 0.67   | 0.51       | 0.88            |
| NHS      | 14   | 0.153 0.121 | 818 296 27/624 169 13      | 1141 806  | 1.57     | 0.2106889     | 1  | 0.65   | 0.33       | 1.28            |
| STAGE1-2 | 13   | 0.143 0.122 | 3887 1281 116/2710 757 49  | 5284 3516 | 7.67     | 0.0055994     | 1  | 0.62   | 0.44       | 0.87            |
| STAGE2   | 13   | 0.140 0.122 | 3069 985 89/2086 588 36    | 4143 2710 | 6.06     | 0.0138636     | 1  | 0.61   | 0.41       | 0.91            |
| CPSII    | 14   | 0.140 0.114 | 398 138 7/250 60 6         | 543 316   | 0.72     | 0.396125      | 1  | 1.61   | 0.53       | 4.89            |
| PBCS1    | 8    | 0.153 0.110 | 364 129 13/278 72 3        | 506 353   | 2.68     | 0.1018103     | 1  | 0.36   | 0.10       | 1.29            |
| PLCO     | 6    | 0.132 0.116 | 738 216 21/348 96 4        | 975 448   | 2.71     | 0.0999807     | 1  | 0.41   | 0.14       | 1.22            |
| WHI      | 14   | 0.141 0.126 | 1783 572 54/1330 386 26    | 2409 1742 | 3.08     | 0.0792473     | 1  | 0.66   | 0.41       | 1.05            |
| STAGE3   | 8    | 0.127 0.122 | 2733 758 72/1229 335 26    | 3563 1590 | 1.20     | 0.2728951     | 1  | 0.77   | 0.49       | 1.23            |
| NHS2     | 17   | 0.126 0.118 | 869 243 21/261 69 5        | 1133 335  | 0.17     | 0.6840351     | 1  | 0.82   | 0.30       | 2.18            |
| PBCS2    | 19   | 0.124 0.119 | 1344 368 32/554 145 12     | 1744 711  | 0.06     | 0.8107094     | 1  | 0.92   | 0.47       | 1.80            |
| WHS      | 6    | 0.135 0.128 | 520 147 19/414 121 9       | 686 544   | 1.65     | 0.1984939     | 1  | 0.59   | 0.27       | 1.33            |
| PBCS 1+2 | 7    | 0.130 0.115 | 1706 494 45/832 214 15     | 2245 1061 | 1.57     | 0.2097821     | 1  | 0.69   | 0.38       | 1.24            |

Locus rs17740709 Alleles A|G Chr 12q21.31 Location Neighborhood 81947471 TMTC2

| SUBSET   | Rank | MAF         | Geno Counts                 | Subjects  | score X2 | score p-value | df | hom OR | hom OR 95% | hom OR 95% CI_u |
|----------|------|-------------|-----------------------------|-----------|----------|---------------|----|--------|------------|-----------------|
| STAGE1-3 | 11   | 0.219 0.220 | 5354 3028 417/3142 1658 292 | 8799 5092 | 8.42     | 0.003709      | 1  | 1.26   | 1.08       | 1.47            |
| NHS      | 3    | 0.218 0.222 | 691 402 48/502 251 54       | 1141 807  | 6.22     | 0.0126559     | 1  | 1.66   | 1.11       | 2.48            |
| STAGE1-2 | 8    | 0.218 0.217 | 3200 1869 215/2194 1121 202 | 5284 3517 | 13.37    | 0.0002559     | 1  | 1.45   | 1.19       | 1.76            |
| STAGE2   | 11   | 0.217 0.215 | 2509 1467 167/1692 870 148  | 4143 2710 | 7.71     | 0.0054844     | 1  | 1.38   | 1.10       | 1.74            |
| CPSII    | 13   | 0.215 0.199 | 328 197 18/205 96 15        | 543 316   | 0.85     | 0.3572388     | 1  | 1.39   | 0.69       | 2.84            |
| PBCS1    | 10   | 0.242 0.245 | 282 203 21/203 127 23       | 506 353   | 2.24     | 0.1343555     | 1  | 1.60   | 0.86       | 2.97            |
| PLCO     | 17   | 0.214 0.218 | 603 326 46/277 147 24       | 975 448   | 0.11     | 0.7440809     | 1  | 1.09   | 0.65       | 1.83            |
| WHI      | 9    | 0.215 0.210 | 1466 851 92/1105 544 93     | 2409 1742 | 5.47     | 0.0193961     | 1  | 1.42   | 1.06       | 1.91            |
| STAGE3   | 22   | 0.222 0.228 | 2154 1160 202/948 539 90    | 3516 1577 | 0.06     | 0.8108164     | 1  | 1.03   | 0.80       | 1.34            |
| NHS2     | 23   | 0.210 0.212 | 694 349 56/207 109 16       | 1099 332  | 0.05     | 0.8297526     | 1  | 0.94   | 0.53       | 1.66            |
| PBCS2    | 5    | 0.234 0.254 | 1042 597 112/398 260 50     | 1751 708  | 0.66     | 0.4183108     | 1  | 1.15   | 0.82       | 1.63            |
| WHS      | 19   | 0.212 0.203 | 418 214 34/343 170 24       | 666 537   | 0.19     | 0.6669063     | 1  | 0.89   | 0.52       | 1.52            |
| PBCS 1+2 | 5    | 0.236 0.251 | 1324 799 133/601 385 73     | 2256 1059 | 1.82     | 0.1774008     | 1  | 1.23   | 0.91       | 1.65            |

Locus rs17570439 Alleles T|C Chr 1p34.2 Location Neighborhood 40096797 TRIT1

| SUBSET | Rank | MAF | Geno Counts | Subjects | score X2 | score p-value | df | hom OR | hom OR 95% | hom OR 95% CI_u |
|--------|------|-----|-------------|----------|----------|---------------|----|--------|------------|-----------------|
|--------|------|-----|-------------|----------|----------|---------------|----|--------|------------|-----------------|

|          |    |             |                             |           |       |            |   |      |      |      |
|----------|----|-------------|-----------------------------|-----------|-------|------------|---|------|------|------|
| STAGE1-3 | 12 | 0.208 0.224 | 5507 2905 379 3076 1762 263 | 8791 5101 | 7.61  | 0.0057962  | 1 | 1.26 | 1.07 | 1.48 |
| NHS      | 8  | 0.204 0.245 | 718 381 42 457 304 46       | 1141 807  | 4.75  | 0.0293298  | 1 | 1.61 | 1.05 | 2.47 |
| STAGE1-2 | 6  | 0.208 0.229 | 3285 1798 201 2104 1217 196 | 5284 3517 | 17.02 | 0.00003697 | 1 | 1.53 | 1.25 | 1.88 |
| STAGE2   | 6  | 0.209 0.224 | 2567 1417 159 1647 913 150  | 4143 2710 | 12.13 | 0.0004972  | 1 | 1.50 | 1.19 | 1.89 |
| CPSII    | 5  | 0.196 0.201 | 343 187 13 203 99 14        | 543 316   | 2.98  | 0.0844232  | 1 | 1.97 | 0.90 | 4.32 |
| PBCS1    | 5  | 0.210 0.215 | 310 179 17 223 108 22       | 506 353   | 4.21  | 0.0400748  | 1 | 1.98 | 1.02 | 3.83 |
| PLCO     | 22 | 0.220 0.238 | 599 323 53 259 165 24       | 975 448   | 0.00  | 0.9843458  | 1 | 1.00 | 0.60 | 1.64 |
| WHI      | 5  | 0.206 0.225 | 1501 825 83 1053 594 95     | 2409 1742 | 9.77  | 0.0017715  | 1 | 1.61 | 1.19 | 2.18 |
| STAGE3   | 9  | 0.209 0.214 | 2222 1108 178 972 545 67    | 3508 1584 | 1.08  | 0.2987114  | 1 | 0.86 | 0.64 | 1.15 |
| NHS2     | 15 | 0.208 0.229 | 694 332 60 194 119 16       | 1086 329  | 0.19  | 0.6590717  | 1 | 0.88 | 0.50 | 1.55 |
| PBCS2    | 23 | 0.208 0.210 | 1111 557 86 448 228 35      | 1754 711  | 0.00  | 0.9570248  | 1 | 0.99 | 0.66 | 1.48 |
| WHS      | 4  | 0.212 0.211 | 417 219 32 330 198 16       | 668 544   | 2.65  | 0.1034165  | 1 | 0.60 | 0.33 | 1.11 |
| PBCS 1+2 | 12 | 0.208 0.211 | 1421 735 103 671 336 57     | 2259 1064 | 1.13  | 0.2870481  | 1 | 1.20 | 0.86 | 1.68 |

Locus Alleles Chr Location Neighborhood  
rs3817198 T|C 11p15.5 1865582 LSP1

| SUBSET   | Rank | MAF         | Geno Counts                 | Subjects  | score X2 | score p-value | df | hom OR | hom OR 95% | hom OR 95% CI_u |
|----------|------|-------------|-----------------------------|-----------|----------|---------------|----|--------|------------|-----------------|
| STAGE1-3 | 13   | 0.324 0.335 | 4021 3887 916 2294 2211 606 | 8824 5111 | 7.22     | 0.0072224     | 1  | 1.16   | 1.04       | 1.30            |
| NHS      | 12   | 0.318 0.328 | 524 509 108 373 339 95      | 1141 807  | 2.49     | 0.1149265     | 1  | 1.27   | 0.94       | 1.70            |
| STAGE1-2 | 17   | 0.325 0.337 | 2407 2311 562 1564 1530 419 | 5280 3513 | 3.17     | 0.0752077     | 1  | 1.13   | 0.99       | 1.30            |
| STAGE2   | 18   | 0.327 0.340 | 1883 1802 454 1191 1191 324 | 4139 2706 | 1.40     | 0.236159      | 1  | 1.10   | 0.94       | 1.28            |
| CPSII    | 21   | 0.334 0.340 | 243 231 64 139 138 38       | 538 315   | 0.06     | 0.8027409     | 1  | 1.06   | 0.68       | 1.63            |
| PBCS1    | 14   | 0.319 0.326 | 229 228 47 161 150 39       | 504 350   | 0.60     | 0.4369463     | 1  | 1.20   | 0.76       | 1.89            |
| PLCO     | 3    | 0.335 0.334 | 440 417 118 190 215 42      | 975 447   | 3.43     | 0.0639932     | 1  | 0.70   | 0.48       | 1.02            |
| WHI      | 11   | 0.326 0.343 | 1097 1051 260 768 753 221   | 2408 1742 | 3.99     | 0.0456487     | 1  | 1.22   | 1.00       | 1.47            |
| STAGE3   | 2    | 0.322 0.331 | 1613 1577 354 727 682 187   | 3544 1596 | 3.89     | 0.0486059     | 1  | 1.21   | 1.00       | 1.47            |
| NHS2     | 10   | 0.317 0.324 | 518 491 109 160 145 39      | 1118 344  | 0.71     | 0.3985682     | 1  | 1.18   | 0.80       | 1.74            |
| PBCS2    | 4    | 0.330 0.330 | 789 789 189 326 301 84      | 1767 711  | 0.66     | 0.4180283     | 1  | 1.12   | 0.85       | 1.47            |
| WHS      | 3    | 0.310 0.336 | 306 297 56 241 236 64       | 659 541   | 3.50     | 0.0613945     | 1  | 1.43   | 0.98       | 2.10            |
| PBCS 1+2 | 10   | 0.328 0.327 | 1019 1016 236 490 450 123   | 2271 1063 | 1.21     | 0.2711777     | 1  | 1.14   | 0.90       | 1.44            |

Locus Alleles Chr Location Neighborhood  
rs1274466 T|C 10p11.21 34510210 PARD3

| SUBSET   | Rank | MAF         | Geno Counts                  | Subjects  | score X2 | score p-value | df | hom OR | hom OR 95% | hom OR 95% CI_u |
|----------|------|-------------|------------------------------|-----------|----------|---------------|----|--------|------------|-----------------|
| STAGE1-3 | 14   | 0.451 0.434 | 2683 4344 1810 1648 2482 973 | 8837 5103 | 3.73     | 0.053449      | 1  | 0.92   | 0.84       | 1.00            |
| NHS      | 15   | 0.470 0.436 | 312 585 244 261 388 158      | 1141 807  | 0.88     | 0.3476382     | 1  | 0.90   | 0.72       | 1.12            |
| STAGE1-2 | 16   | 0.454 0.429 | 1574 2618 1092 1164 1687 665 | 5284 3516 | 4.09     | 0.0432465     | 1  | 0.89   | 0.80       | 1.00            |
| STAGE2   | 16   | 0.450 0.427 | 1262 2033 848 903 1299 507   | 4143 2709 | 3.29     | 0.0699077     | 1  | 0.89   | 0.79       | 1.01            |
| CPSII    | 15   | 0.471 0.440 | 152 271 120 101 152 63       | 543 316   | 0.55     | 0.4579435     | 1  | 0.88   | 0.62       | 1.24            |
| PBCS1    | 15   | 0.483 0.457 | 138 247 121 104 174 74       | 506 352   | 0.57     | 0.4497868     | 1  | 0.88   | 0.63       | 1.23            |
| PLCO     | 2    | 0.449 0.391 | 298 478 199 167 212 69       | 975 448   | 4.64     | 0.0312518     | 1  | 0.72   | 0.53       | 0.97            |
| WHI      | 19   | 0.443 0.428 | 755 1175 479 579 835 328     | 2409 1742 | 0.79     | 0.3729467     | 1  | 0.93   | 0.80       | 1.09            |
| STAGE3   | 15   | 0.445 0.445 | 1109 1730 719 484 795 309    | 3558 1588 | 0.26     | 0.6103954     | 1  | 0.96   | 0.83       | 1.12            |
| NHS2     | 11   | 0.440 0.432 | 363 535 227 106 166 61       | 1125 333  | 0.54     | 0.4628408     | 1  | 0.89   | 0.65       | 1.22            |
| PBCS2    | 6    | 0.457 0.451 | 518 863 368 211 357 141      | 1749 709  | 0.55     | 0.4563158     | 1  | 0.92   | 0.74       | 1.15            |
| WHS      | 11   | 0.424 0.445 | 228 332 124 167 272 107      | 684 546   | 0.67     | 0.4115616     | 1  | 1.13   | 0.85       | 1.51            |
| PBCS 1+2 | 8    | 0.463 0.452 | 656 1106 488 315 531 214     | 2250 1060 | 1.40     | 0.2364038     | 1  | 0.90   | 0.75       | 1.07            |

Locus Alleles Chr Location Neighborhood  
rs2391406 T|G 13q33.3 106586873

| SUBSET | Rank | MAF | Geno Counts | Subjects | score X2 | score p-value | df | hom OR | hom OR 95% | hom OR 95% CI_u |
|--------|------|-----|-------------|----------|----------|---------------|----|--------|------------|-----------------|
|--------|------|-----|-------------|----------|----------|---------------|----|--------|------------|-----------------|



|          |    |             |                              |           |       |           |   |      |      |      |
|----------|----|-------------|------------------------------|-----------|-------|-----------|---|------|------|------|
| STAGE1-3 | 15 | 0.372 0.367 | 3513 4015 1265/2027 2376 676 | 8793 5079 | 2.73  | 0.0983925 | 1 | 0.92 | 0.83 | 1.02 |
| NHS      | 20 | 0.371 0.366 | 452 529 159/323 377 107      | 1140 807  | 0.23  | 0.6317859 | 1 | 0.94 | 0.72 | 1.22 |
| STAGE1-2 | 10 | 0.375 0.364 | 2110 2378 788/1393 1684 438  | 5276 3515 | 10.00 | 0.0015639 | 1 | 0.82 | 0.72 | 0.93 |
| STAGE2   | 7  | 0.376 0.364 | 1658 1849 629/1070 1307 331  | 4136 2708 | 11.19 | 0.0008225 | 1 | 0.78 | 0.68 | 0.90 |
| CPSII    | 3  | 0.371 0.339 | 217 240 79/132 150 31        | 536 313   | 4.61  | 0.0318004 | 1 | 0.62 | 0.40 | 0.96 |
| PBCS1    | 3  | 0.387 0.375 | 195 230 81/125 190 37        | 506 352   | 5.18  | 0.0228381 | 1 | 0.62 | 0.40 | 0.94 |
| PLCO     | 4  | 0.376 0.360 | 398 416 157/180 213 55       | 971 448   | 3.35  | 0.0670598 | 1 | 0.73 | 0.52 | 1.02 |
| WHI      | 13 | 0.372 0.365 | 971 1084 353/693 828 221     | 2408 1742 | 3.22  | 0.0729419 | 1 | 0.85 | 0.71 | 1.02 |
| STAGE3   | 5  | 0.369 0.373 | 1403 1641 477/634 693 238    | 3521 1565 | 2.70  | 0.10024   | 1 | 1.15 | 0.97 | 1.37 |
| NHS2     | 2  | 0.341 0.392 | 493 477 140/129 154 56       | 1110 339  | 3.60  | 0.0578116 | 1 | 1.39 | 0.99 | 1.94 |
| PBCS2    | 2  | 0.380 0.381 | 656 853 236/275 321 108      | 1745 704  | 1.84  | 0.1745979 | 1 | 1.19 | 0.93 | 1.52 |
| WHS      | 18 | 0.385 0.351 | 254 311 101/230 218 74       | 666 522   | 0.20  | 0.6545431 | 1 | 0.93 | 0.67 | 1.29 |
| PBCS 1+2 | 21 | 0.381 0.379 | 851 1079 317/400 510 145     | 2247 1055 | 0.03  | 0.867966  | 1 | 0.98 | 0.79 | 1.22 |

Locus Alleles Chr Location Neighborhood  
rs724244 C|T 3p24.1 27217157 NEK10

| SUBSET   | Rank | MAF         | Geno Counts                 | Subjects  | score X2 | score p-value | df | hom OR | hom OR 95% | hom OR 95% CI_u |
|----------|------|-------------|-----------------------------|-----------|----------|---------------|----|--------|------------|-----------------|
| STAGE1-3 | 16   | 0.261 0.273 | 4211 2933 535/2281 1695 328 | 7679 4304 | 2.29     | 0.1306162     | 1  | 1.12   | 0.97       | 1.29            |
| STAGE1-2 | 14   | 0.252 0.275 | 2304 1588 250/1429 1071 209 | 4142 2709 | 6.94     | 0.0084311     | 1  | 1.29   | 1.06       | 1.56            |
| STAGE2   | 12   | 0.252 0.275 | 2304 1588 250/1429 1071 209 | 4142 2709 | 6.79     | 0.0091764     | 1  | 1.29   | 1.06       | 1.56            |
| CPSII    | 17   | 0.247 0.266 | 309 198 35/173 118 25       | 542 316   | 0.28     | 0.5960563     | 1  | 1.16   | 0.67       | 1.98            |
| PBCS1    | 11   | 0.246 0.265 | 293 177 36/198 123 32       | 506 353   | 1.35     | 0.2453639     | 1  | 1.35   | 0.81       | 2.24            |
| PLCO     | 5    | 0.230 0.271 | 569 364 42/235 182 30       | 975 447   | 2.94     | 0.0863305     | 1  | 1.54   | 0.94       | 2.51            |
| WHI      | 18   | 0.263 0.280 | 1302 949 158/901 708 133    | 2409 1742 | 1.95     | 0.162838      | 1  | 1.19   | 0.93       | 1.51            |
| STAGE3   | 12   | 0.271 0.270 | 1907 1349 285/852 624 119   | 3541 1595 | 0.47     | 0.4944065     | 1  | 0.92   | 0.74       | 1.16            |
| NHS2     | 16   | 0.269 0.281 | 611 397 100/176 134 28      | 1108 338  | 0.18     | 0.6753068     | 1  | 0.91   | 0.59       | 1.41            |
| PBCS2    | 9    | 0.273 0.265 | 926 696 131/381 280 48      | 1753 709  | 0.47     | 0.4936051     | 1  | 0.89   | 0.63       | 1.25            |
| WHS      | 23   | 0.268 0.270 | 370 256 54/295 210 43       | 680 548   | 0.00     | 0.9603242     | 1  | 1.01   | 0.66       | 1.54            |
| PBCS 1+2 | 22   | 0.267 0.265 | 1219 869 167/579 403 80     | 2255 1062 | 0.00     | 0.9656823     | 1  | 1.01   | 0.76       | 1.33            |

Locus Alleles Chr Location Neighborhood  
rs3134615 G|T 1p34.2 40134653 TRIT1,MYCL1

| SUBSET   | Rank | MAF         | Geno Counts                 | Subjects  | score X2 | score p-value | df | hom OR | hom OR 95% | hom OR 95% CI_u |
|----------|------|-------------|-----------------------------|-----------|----------|---------------|----|--------|------------|-----------------|
| STAGE1-3 | 17   | 0.227 0.243 | 5293 3091 463/2906 1906 288 | 8847 5100 | 2.21     | 0.1373443     | 1  | 1.12   | 0.96       | 1.31            |
| NHS      | 11   | 0.220 0.262 | 689 402 50/433 325 49       | 1141 807  | 3.11     | 0.0778363     | 1  | 1.44   | 0.96       | 2.16            |
| STAGE1-2 | 15   | 0.228 0.248 | 3133 1895 256/1984 1323 210 | 5284 3517 | 6.83     | 0.0089755     | 1  | 1.27   | 1.05       | 1.54            |
| STAGE2   | 15   | 0.230 0.244 | 2444 1493 206/1551 998 161  | 4143 2710 | 3.51     | 0.0609587     | 1  | 1.23   | 0.99       | 1.52            |
| CPSII    | 4    | 0.215 0.222 | 326 200 17/193 106 17       | 543 316   | 3.24     | 0.0720766     | 1  | 1.88   | 0.94       | 3.79            |
| PBCS1    | 9    | 0.226 0.231 | 299 185 22/213 117 23       | 506 353   | 2.25     | 0.1333174     | 1  | 1.59   | 0.86       | 2.94            |
| PLCO     | 16   | 0.236 0.253 | 578 334 63/247 175 26       | 975 448   | 0.19     | 0.6620274     | 1  | 0.90   | 0.56       | 1.45            |
| WHI      | 15   | 0.229 0.247 | 1421 875 113/985 654 103    | 2409 1742 | 3.03     | 0.0818347     | 1  | 1.28   | 0.97       | 1.68            |
| STAGE3   | 11   | 0.226 0.234 | 2160 1196 207/922 585 79    | 3563 1586 | 0.83     | 0.3608993     | 1  | 0.88   | 0.67       | 1.16            |
| NHS2     | 13   | 0.228 0.241 | 687 372 72/190 124 18       | 1131 332  | 0.38     | 0.5388816     | 1  | 0.85   | 0.50       | 1.44            |
| PBCS2    | 16   | 0.226 0.225 | 1063 591 102/427 240 39     | 1756 706  | 0.13     | 0.7140475     | 1  | 0.93   | 0.64       | 1.36            |
| WHS      | 14   | 0.221 0.242 | 410 233 33/305 221 22       | 676 548   | 0.53     | 0.4654874     | 1  | 0.81   | 0.47       | 1.42            |
| PBCS 1+2 | 17   | 0.226 0.226 | 1362 776 124/640 355 61     | 2262 1056 | 0.19     | 0.6602341     | 1  | 1.07   | 0.78       | 1.48            |

Locus Alleles Chr Location Neighborhood  
rs4666451 G|A 2p24.1 19150424

| SUBSET   | Rank | MAF         | Geno Counts                  | Subjects  | score X2 | score p-value | df | hom OR | hom OR 95% | hom OR 95% CI_u |
|----------|------|-------------|------------------------------|-----------|----------|---------------|----|--------|------------|-----------------|
| STAGE1-3 | 18   | 0.395 0.385 | 2822 3643 1205/1621 2044 634 | 7670 4299 | 1.88     | 0.1705625     | 1  | 0.93   | 0.84       | 1.03            |

|          |    |             |                             |           |      |           |   |      |      |      |
|----------|----|-------------|-----------------------------|-----------|------|-----------|---|------|------|------|
| STAGE1-2 | 18 | 0.398 0.383 | 1509 1968 666/1028 1286 396 | 4143 2710 | 2.66 | 0.103015  | 1 | 0.89 | 0.78 | 1.02 |
| STAGE2   | 17 | 0.398 0.383 | 1509 1968 666/1028 1286 396 | 4143 2710 | 2.69 | 0.1012146 | 1 | 0.89 | 0.78 | 1.02 |
| CPSII    | 8  | 0.394 0.413 | 201 256 86/96 179 41        | 543 316   | 1.43 | 0.232324  | 1 | 0.78 | 0.52 | 1.17 |
| PBCS1    | 17 | 0.409 0.375 | 176 246 84/140 161 52       | 506 353   | 0.28 | 0.5972217 | 1 | 0.90 | 0.62 | 1.32 |
| PLCO     | 12 | 0.393 0.394 | 355 474 146/170 203 75      | 975 448   | 0.77 | 0.3799651 | 1 | 1.15 | 0.84 | 1.56 |
| WHI      | 12 | 0.397 0.378 | 890 1125 394/672 822 248    | 2409 1742 | 3.51 | 0.060988  | 1 | 0.85 | 0.71 | 1.01 |
| STAGE3   | 20 | 0.390 0.388 | 1315 1676 539/593 760 238   | 3530 1591 | 0.08 | 0.7794544 | 1 | 0.98 | 0.83 | 1.16 |
| NHS2     | 4  | 0.382 0.370 | 428 504 169/128 165 41      | 1101 334  | 1.97 | 0.1600613 | 1 | 0.77 | 0.53 | 1.11 |
| PBCS2    | 7  | 0.399 0.398 | 621 858 268/263 330 118     | 1747 711  | 0.53 | 0.4675461 | 1 | 1.09 | 0.86 | 1.39 |
| WHS      | 22 | 0.380 0.387 | 266 314 102/202 265 79      | 682 546   | 0.02 | 0.8878245 | 1 | 0.98 | 0.71 | 1.34 |
| PBCS 1+2 | 19 | 0.402 0.390 | 795 1103 352/403 489 170    | 2250 1062 | 0.08 | 0.774847  | 1 | 1.03 | 0.84 | 1.26 |

Locus Alleles Chr Location Neighborhood  
rs2303659 G|A 11q24.3 129326474 PRDM10

| SUBSET   | Rank | MAF         | Geno Counts            | Subjects  | score X2 | score p-value | df | hom OR | hom OR 95% | hom OR 95% CI_u |
|----------|------|-------------|------------------------|-----------|----------|---------------|----|--------|------------|-----------------|
| STAGE1-3 | 19   | 0.034 0.026 | 8222 583 10/4833 251 9 | 8815 5093 | 1.54     | 0.2139323     | 1  | 1.78   | 0.71       | 4.50            |
| NHS      | 22   | 0.034 0.026 | 1063 78 0/765 42 0     | 1141 807  | -        |               | 1  | 1.00   | 1.00       | 1.00            |
| STAGE1-2 | 22   | 0.034 0.025 | 4926 356 2/3341 174 2  | 5284 3517 | 0.26     | 0.6120144     | 1  | 1.66   | 0.23       | 11.99           |
| STAGE2   | 21   | 0.034 0.025 | 3863 278 2/2576 132 2  | 4143 2710 | 0.26     | 0.6112874     | 1  | 1.66   | 0.23       | 12.04           |
| CPSII    | 24   | 0.030 0.019 | 510 33 0/305 10 1      | 543 316   |          |               |    |        |            |                 |
| PBCS1    | 22   | 0.033 0.024 | 473 33 0/336 17 0      | 506 353   | -        |               | 1  | 1.00   | 1.00       | 1.00            |
| PLCO     | 24   | 0.036 0.026 | 906 68 1/425 23 0      | 975 448   |          |               |    |        |            |                 |
| WHI      | 23   | 0.034 0.025 | 2245 163 1/1655 86 1   | 2409 1742 | 0.06     | 0.8073679     | 1  | 1.41   | 0.09       | 22.59           |
| STAGE3   | 7    | 0.034 0.029 | 3296 227 8/1493 77 7   | 3531 1577 | 1.35     | 0.2446899     | 1  | 1.84   | 0.65       | 5.24            |
| NHS2     | 9    | 0.039 0.030 | 1029 77 5/321 14 3     | 1111 338  | 0.87     | 0.3503788     | 1  | 1.96   | 0.47       | 8.25            |
| PBCS2    | 24   | 0.032 0.028 | 1648 112 1/669 40 0    | 1761 709  |          |               |    |        |            |                 |
| WHS      | 9    | 0.032 0.029 | 619 38 2/503 23 4      | 659 530   | 1.04     | 0.3077379     | 1  | 2.37   | 0.43       | 13.06           |
| PBCS 1+2 | 24   | 0.032 0.027 | 2121 145 1/1004 57 0   | 2267 1061 |          |               |    |        |            |                 |

Locus Alleles Chr Location Neighborhood  
rs10850145 C|T 12q24.13 112428512

| SUBSET   | Rank | MAF         | Geno Counts               | Subjects  | score X2 | score p-value | df | hom OR | hom OR 95% | hom OR 95% CI_u |
|----------|------|-------------|---------------------------|-----------|----------|---------------|----|--------|------------|-----------------|
| STAGE1-3 | 20   | 0.094 0.109 | 7261 1521 74/4054 1012 52 | 8856 5118 | 1.49     | 0.222786      | 1  | 1.25   | 0.87       | 1.80            |
| NHS      | 9    | 0.085 0.108 | 951 185 5/642 155 10      | 1141 807  | 4.20     | 0.0405197     | 1  | 2.94   | 1.00       | 8.68            |
| STAGE1-2 | 20   | 0.089 0.110 | 4388 849 47/2781 693 41   | 5284 3515 | 1.43     | 0.2318943     | 1  | 1.29   | 0.85       | 1.98            |
| STAGE2   | 22   | 0.090 0.111 | 3437 664 42/2139 538 31   | 4143 2708 | 0.15     | 0.6948482     | 1  | 1.10   | 0.69       | 1.76            |
| CPSII    | 18   | 0.099 0.111 | 444 90 9/250 62 4         | 543 316   | 0.22     | 0.6373953     | 1  | 0.75   | 0.23       | 2.49            |
| PBCS1    | 21   | 0.094 0.123 | 417 83 6/270 79 4         | 506 353   | 0.00     | 0.9805609     | 1  | 0.98   | 0.27       | 3.57            |
| PLCO     | 19   | 0.077 0.106 | 832 135 8/357 87 4        | 975 448   | 0.02     | 0.8836901     | 1  | 1.10   | 0.32       | 3.72            |
| WHI      | 20   | 0.094 0.110 | 1982 403 24/1378 341 21   | 2409 1740 | 0.43     | 0.5097469     | 1  | 1.22   | 0.67       | 2.21            |
| STAGE3   | 14   | 0.102 0.106 | 2873 673 27/1275 319 11   | 3573 1605 | 0.26     | 0.6088308     | 1  | 1.20   | 0.59       | 2.44            |
| NHS2     | 8    | 0.103 0.099 | 905 207 12/280 56 6       | 1124 342  | 1.00     | 0.3166356     | 1  | 1.65   | 0.61       | 4.43            |
| PBCS2    | 20   | 0.104 0.107 | 1412 338 15/565 143 5     | 1765 713  | 0.05     | 0.8267081     | 1  | 0.89   | 0.32       | 2.48            |
| WHS      | 24   | 0.094 0.109 | 556 128 0/430 120 0       | 684 550   | -        |               | 1  | 1.00   | 1.00       | 1.00            |
| PBCS 1+2 | 18   | 0.102 0.113 | 1829 420 21/833 222 9     | 2270 1064 | 0.11     | 0.7458701     | 1  | 0.88   | 0.40       | 1.94            |

Locus Alleles Chr Location Neighborhood  
rs11077820 T|C 17q25.1 71966263 UBE2O,AANAT

| SUBSET   | Rank | MAF         | Geno Counts                  | Subjects  | score X2 | score p-value | df | hom OR | hom OR 95% | hom OR 95% CI_u |
|----------|------|-------------|------------------------------|-----------|----------|---------------|----|--------|------------|-----------------|
| STAGE1-3 | 21   | 0.374 0.367 | 3426 4157 1207/2093 2255 738 | 8790 5086 | 1.00     | 0.3173477     | 1  | 1.05   | 0.95       | 1.16            |
| NHS      | 17   | 0.382 0.374 | 429 553 159/329 353 125      | 1141 807  | 0.65     | 0.4207389     | 1  | 1.11   | 0.86       | 1.43            |

|          |    |             |                             |           |      |           |   |      |      |      |
|----------|----|-------------|-----------------------------|-----------|------|-----------|---|------|------|------|
| STAGE1-2 | 19 | 0.383 0.368 | 1953 2611 714/1447 1549 517 | 5278 3513 | 1.56 | 0.2118001 | 1 | 1.08 | 0.96 | 1.22 |
| STAGE2   | 19 | 0.383 0.366 | 1524 2058 555/1118 1196 392 | 4137 2706 | 0.96 | 0.3261871 | 1 | 1.07 | 0.93 | 1.24 |
| CP5II    | 12 | 0.377 0.359 | 216 242 83/131 143 42       | 541 316   | 0.86 | 0.352564  | 1 | 0.83 | 0.55 | 1.24 |
| PBCS1    | 18 | 0.375 0.334 | 193 244 67/160 150 43       | 504 353   | 0.20 | 0.6550775 | 1 | 0.91 | 0.60 | 1.38 |
| PLCO     | 21 | 0.371 0.354 | 371 484 120/188 200 58      | 975 446   | 0.00 | 0.9724687 | 1 | 0.99 | 0.70 | 1.40 |
| WHI      | 10 | 0.385 0.378 | 871 1215 320/694 776 270    | 2406 1740 | 4.00 | 0.045434  | 1 | 1.20 | 1.00 | 1.43 |
| STAGE3   | 23 | 0.361 0.365 | 1473 1545 494/646 707 221   | 3512 1574 | 0.01 | 0.9377012 | 1 | 0.99 | 0.83 | 1.18 |
| NHS2     | 20 | 0.364 0.373 | 446 495 150/133 153 48      | 1091 334  | 0.08 | 0.7814882 | 1 | 1.05 | 0.74 | 1.49 |
| PBCS2    | 10 | 0.359 0.382 | 732 784 238/269 335 102     | 1754 706  | 0.46 | 0.4981648 | 1 | 1.09 | 0.85 | 1.40 |
| WHS      | 7  | 0.358 0.338 | 295 266 106/244 219 71      | 667 534   | 1.32 | 0.2505137 | 1 | 0.83 | 0.60 | 1.14 |
| PBCS 1+2 | 20 | 0.362 0.366 | 925 1029 304/429 484 145    | 2258 1058 | 0.08 | 0.7802659 | 1 | 1.03 | 0.83 | 1.28 |

Locus Alleles Chr Location Neighborhood  
rs10941679 A|G 5p12 44742255

| SUBSET   | Rank | MAF         | Geno Counts               | Subjects  | score X2 | score p-value | df | hom OR | hom OR 95% | hom OR 95% CI_u |
|----------|------|-------------|---------------------------|-----------|----------|---------------|----|--------|------------|-----------------|
| STAGE1-3 | 22   | 0.259 0.282 | 2201 1519 277/978 787 146 | 3997 1911 | 0.76     | 0.3834227     | 1  | 1.10   | 0.89       | 1.36            |
| STAGE3   | 21   | 0.259 0.278 | 1945 1325 250/817 646 116 | 3520 1579 | 0.07     | 0.7855606     | 1  | 1.03   | 0.82       | 1.30            |
| NHS2     | 5    | 0.256 0.285 | 607 415 73/173 133 29     | 1095 335  | 1.53     | 0.2160407     | 1  | 1.33   | 0.85       | 2.08            |
| PBCS2    | 18   | 0.259 0.288 | 969 667 121/350 308 50    | 1757 708  | 0.07     | 0.7847979     | 1  | 1.05   | 0.74       | 1.48            |
| WHS      | 10   | 0.266 0.260 | 369 243 56/294 205 37     | 668 536   | 0.86     | 0.3546583     | 1  | 0.82   | 0.53       | 1.26            |
| PBCS 1+2 | 11   | 0.259 0.293 | 1225 861 148/511 449 80   | 2234 1040 | 1.15     | 0.2844227     | 1  | 1.17   | 0.88       | 1.55            |

Locus Alleles Chr Location Neighborhood  
rs7936636 C|T 11p11.2 44397546

| SUBSET   | Rank | MAF         | Geno Counts                 | Subjects  | score X2 | score p-value | df | hom OR | hom OR 95% | hom OR 95% CI_u |
|----------|------|-------------|-----------------------------|-----------|----------|---------------|----|--------|------------|-----------------|
| STAGE1-3 | 23   | 0.258 0.250 | 4826 3425 560/2885 1879 337 | 8811 5101 | 0.49     | 0.4853141     | 1  | 1.05   | 0.91       | 1.21            |
| NHS      | 18   | 0.256 0.247 | 634 430 77/470 276 61       | 1141 807  | 0.43     | 0.512331      | 1  | 1.12   | 0.79       | 1.60            |
| STAGE1-2 | 21   | 0.263 0.247 | 2851 2086 344/2020 1258 238 | 5281 3516 | 0.29     | 0.5928223     | 1  | 1.05   | 0.88       | 1.25            |
| STAGE2   | 23   | 0.264 0.247 | 2217 1656 267/1550 982 177  | 4140 2709 | 0.05     | 0.8166463     | 1  | 1.02   | 0.84       | 1.25            |
| CP5II    | 20   | 0.266 0.222 | 286 224 32/197 98 21        | 542 316   | 0.11     | 0.7453774     | 1  | 1.10   | 0.62       | 1.96            |
| PBCS1    | 19   | 0.247 0.229 | 284 193 28/212 119 21       | 505 352   | 0.12     | 0.7334285     | 1  | 1.11   | 0.61       | 2.01            |
| PLCO     | 15   | 0.263 0.253 | 526 385 64/254 161 33       | 975 448   | 0.28     | 0.5941658     | 1  | 1.13   | 0.72       | 1.76            |
| WHI      | 21   | 0.270 0.249 | 1272 973 163/983 649 110    | 2408 1742 | 0.31     | 0.5807631     | 1  | 0.93   | 0.73       | 1.20            |
| STAGE3   | 17   | 0.251 0.258 | 1975 1339 216/865 621 98    | 3530 1584 | 0.17     | 0.677574      | 1  | 1.05   | 0.82       | 1.36            |
| NHS2     | 22   | 0.266 0.239 | 598 438 77/198 117 22       | 1113 337  | 0.06     | 0.8041522     | 1  | 0.94   | 0.58       | 1.54            |
| PBCS2    | 12   | 0.245 0.268 | 993 643 105/372 282 47      | 1741 701  | 0.42     | 0.5172752     | 1  | 1.13   | 0.79       | 1.61            |
| WHS      | 21   | 0.241 0.256 | 384 258 34/295 222 29       | 676 546   | 0.06     | 0.8138009     | 1  | 1.06   | 0.64       | 1.77            |
| PBCS 1+2 | 14   | 0.245 0.256 | 1277 836 133/584 401 69     | 2246 1054 | 0.66     | 0.4176891     | 1  | 1.13   | 0.84       | 1.54            |

Locus Alleles Chr Location Neighborhood  
rs12622050 G|A 2q11.2 100945886 NPAS2

| SUBSET   | Rank | MAF         | Geno Counts                 | Subjects  | score X2 | score p-value | df | hom OR | hom OR 95% | hom OR 95% CI_u |
|----------|------|-------------|-----------------------------|-----------|----------|---------------|----|--------|------------|-----------------|
| STAGE1-3 | 24   | 0.225 0.209 | 5271 3090 432/3197 1647 236 | 8793 5080 | 0.12     | 0.7258511     | 1  | 0.97   | 0.82       | 1.14            |
| NHS      | 13   | 0.220 0.189 | 694 392 55/529 251 27       | 1141 807  | 2.20     | 0.1383192     | 1  | 0.70   | 0.44       | 1.12            |
| STAGE1-2 | 23   | 0.220 0.200 | 3182 1875 227/2262 1101 152 | 5284 3515 | 0.02     | 0.9007959     | 1  | 1.01   | 0.82       | 1.25            |
| STAGE2   | 20   | 0.220 0.203 | 2488 1483 172/1733 850 125  | 4143 2708 | 0.84     | 0.3591234     | 1  | 1.12   | 0.88       | 1.42            |
| CP5II    | 1    | 0.217 0.213 | 323 203 16/201 94 20        | 542 315   | 5.60     | 0.0179345     | 1  | 2.23   | 1.13       | 4.41            |
| PBCS1    | 7    | 0.244 0.249 | 284 197 25/204 121 27       | 506 352   | 3.04     | 0.0811756     | 1  | 1.66   | 0.94       | 2.93            |
| PLCO     | 7    | 0.229 0.195 | 577 350 48/288 145 15       | 975 448   | 1.88     | 0.1703463     | 1  | 0.66   | 0.36       | 1.20            |
| WHI      | 22   | 0.213 0.194 | 1476 838 95/1138 530 73     | 2409 1741 | 0.12     | 0.7258845     | 1  | 1.06   | 0.77       | 1.44            |
| STAGE3   | 13   | 0.232 0.228 | 2090 1217 205/936 547 83    | 3512 1566 | 0.40     | 0.5246446     | 1  | 0.92   | 0.70       | 1.20            |

|          |    |             |                         |           |      |           |   |      |      |      |
|----------|----|-------------|-------------------------|-----------|------|-----------|---|------|------|------|
| NHS2     | 24 | 0.200 0.216 | 712 332 53 202 112 15   | 1097 329  | 0.04 | 0.8353623 | 1 | 0.94 | 0.52 | 1.69 |
| PBCS2    | 21 | 0.252 0.245 | 980 644 117 402 254 45  | 1741 701  | 0.04 | 0.8325276 | 1 | 0.96 | 0.67 | 1.38 |
| WHS      | 13 | 0.231 0.212 | 398 241 35 332 181 23   | 674 536   | 0.61 | 0.4340359 | 1 | 0.81 | 0.47 | 1.38 |
| PBCS 1+2 | 15 | 0.250 0.247 | 1263 839 142 605 374 73 | 2244 1052 | 0.52 | 0.4702286 | 1 | 1.11 | 0.83 | 1.50 |

**unadj\_geno**

| Locus      | Alleles | Chr    | Location | Neighborhood        |
|------------|---------|--------|----------|---------------------|
| rs11249433 | T C     | 1p11.2 |          | 120982136 LOC647121 |

| SUBSET   | Rank | MAF         | Geno Counts                   | Subjects  | score X2 | score p-value | df | het OR | het OR 95% CI | het OR 95% CI | hom OR | hom OR 95% CI | hom OR 95% CI_u |
|----------|------|-------------|-------------------------------|-----------|----------|---------------|----|--------|---------------|---------------|--------|---------------|-----------------|
| STAGE1-3 | 1    | 0.395 0.439 | 3394 4265 1474 1655 2556 1017 | 9133 5228 | 53.07    | 2.987E-12     | 2  | 1.23   | 1.14          | 1.33          | 1.41   | 1.28          | 1.56            |
| NHS      | 1    | 0.388 0.448 | 425 540 170 238 411 155       | 1135 804  | 14.86    | 0.0005921     | 2  | 1.36   | 1.11          | 1.67          | 1.63   | 1.24          | 2.13            |
| STAGE1-2 | 2    | 0.401 0.441 | 2022 2614 919 1124 1831 695   | 5555 3650 | 32.49    | 8.812E-08     | 2  | 1.26   | 1.15          | 1.38          | 1.36   | 1.20          | 1.54            |
| STAGE2   | 3    | 0.404 0.439 | 1597 2074 749 886 1420 540    | 4420 2846 | 19.86    | 0.00004873    | 2  | 1.23   | 1.11          | 1.37          | 1.30   | 1.13          | 1.49            |
| CPSII    | 6    | 0.378 0.405 | 220 235 88 108 159 48         | 543 315   | 4.39     | 0.1112931     | 2  | 1.38   | 1.02          | 1.87          | 1.11   | 0.73          | 1.69            |
| PBCS1    | 20   | 0.387 0.407 | 195 230 81 124 171 58         | 506 353   | 1.07     | 0.5852003     | 2  | 1.17   | 0.87          | 1.58          | 1.13   | 0.75          | 1.69            |
| PLCO     | 19   | 0.420 0.427 | 324 476 169 140 232 75        | 969 447   | 0.97     | 0.6161799     | 2  | 1.13   | 0.88          | 1.45          | 1.03   | 0.73          | 1.44            |
| WHI      | 2    | 0.407 0.455 | 858 1133 411 514 858 359      | 2402 1731 | 19.32    | 0.00006388    | 2  | 1.26   | 1.10          | 1.46          | 1.46   | 1.22          | 1.74            |
| STAGE3   | 1    | 0.385 0.434 | 1376 1653 555 531 725 322     | 3584 1578 | 22.29    | 0.00001446    | 2  | 1.14   | 1.00          | 1.30          | 1.50   | 1.27          | 1.78            |
| NHS2     | 5    | 0.400 0.440 | 433 545 197 114 152 73        | 1175 339  | 4.25     | 0.1196367     | 2  | 1.06   | 0.81          | 1.39          | 1.41   | 1.00          | 1.97            |
| PBCS2    | 1    | 0.362 0.410 | 719 778 240 246 324 121       | 1737 691  | 9.19     | 0.0101021     | 2  | 1.22   | 1.00          | 1.48          | 1.47   | 1.13          | 1.92            |
| WHS      | 1    | 0.421 0.461 | 224 330 118 171 249 128       | 672 548   | 6.31     | 0.042608      | 2  | 0.99   | 0.76          | 1.28          | 1.42   | 1.03          | 1.96            |
| PBCS 1+2 | 1    | 0.368 0.409 | 910 1006 321 370 495 179      | 2237 1044 | 9.59     | 0.0082807     | 2  | 1.21   | 1.03          | 1.42          | 1.37   | 1.10          | 1.71            |

| Locus    | Alleles | Chr     | Location | Neighborhood     |
|----------|---------|---------|----------|------------------|
| rs999737 | C T     | 14q24.1 |          | 68104435 RAD51L1 |

| SUBSET   | Rank | MAF         | Geno Counts                 | Subjects  | score X2 | score p-value | df | het OR | het OR 95% CI | het OR 95% CI | hom OR | hom OR 95% CI | hom OR 95% CI_u |
|----------|------|-------------|-----------------------------|-----------|----------|---------------|----|--------|---------------|---------------|--------|---------------|-----------------|
| STAGE1-3 | 2    | 0.237 0.216 | 5374 3222 563 3232 1803 234 | 9159 5269 | 22.49    | 0.00001308    | 2  | 0.93   | 0.87          | 1.00          | 0.69   | 0.59          | 0.81            |
| NHS      | 7    | 0.244 0.209 | 660 405 76 499 278 30       | 1141 807  | 8.94     | 0.0114589     | 2  | 0.91   | 0.75          | 1.10          | 0.52   | 0.34          | 0.81            |
| STAGE1-2 | 10   | 0.238 0.211 | 3263 1971 341 2274 1237 156 | 5575 3667 | 20.42    | 0.00003676    | 2  | 0.90   | 0.82          | 0.98          | 0.66   | 0.54          | 0.80            |
| STAGE2   | 13   | 0.236 0.212 | 2603 1566 265 1775 959 126  | 4434 2860 | 12.87    | 0.0016026     | 2  | 0.90   | 0.81          | 0.99          | 0.70   | 0.56          | 0.87            |
| CPSII    | 21   | 0.235 0.223 | 319 193 31 193 105 18       | 543 316   | 0.49     | 0.782539      | 2  | 0.90   | 0.67          | 1.21          | 0.96   | 0.52          | 1.76            |
| PBCS1    | 5    | 0.242 0.203 | 291 185 30 219 125 9        | 506 353   | 6.02     | 0.0491689     | 2  | 0.90   | 0.67          | 1.20          | 0.40   | 0.19          | 0.86            |
| PLCO     | 3    | 0.238 0.225 | 576 334 65 262 170 16       | 975 448   | 6.36     | 4.15E-02      | 2  | 1.12   | 0.88          | 1.42          | 0.54   | 0.31          | 0.95            |
| WHI      | 12   | 0.235 0.208 | 1417 854 139 1101 559 83    | 2410 1743 | 8.47     | 0.0145128     | 2  | 0.84   | 0.74          | 0.96          | 0.77   | 0.58          | 1.02            |
| STAGE3   | 8    | 0.237 0.225 | 2112 1254 222 959 567 78    | 3588 1604 | 3.58     | 0.1672989     | 2  | 1.00   | 0.88          | 1.13          | 0.77   | 0.59          | 1.01            |
| NHS2     | 17   | 0.232 0.234 | 698 374 81 205 120 21       | 1153 346  | 0.84     | 0.6577958     | 2  | 1.09   | 0.84          | 1.41          | 0.88   | 0.53          | 1.46            |
| PBCS2    | 14   | 0.236 0.224 | 1016 637 94 422 248 34      | 1747 704  | 0.78     | 0.6781444     | 2  | 0.94   | 0.78          | 1.13          | 0.87   | 0.58          | 1.31            |
| WHS      | 4    | 0.245 0.221 | 398 243 47 332 199 23       | 688 554   | 4.17     | 0.124496      | 2  | 0.98   | 0.77          | 1.24          | 0.59   | 0.35          | 0.99            |
| PBCS 1+2 | 6    | 0.237 0.217 | 1306 819 124 640 372 43     | 2249 1055 | 4.02     | 0.133801      | 2  | 0.93   | 0.79          | 1.08          | 0.71   | 0.49          | 1.01            |

| Locus     | Alleles | Chr  | Location | Neighborhood |
|-----------|---------|------|----------|--------------|
| rs7716600 | C A     | 5p12 |          | 44910762     |

| SUBSET   | Rank | MAF         | Geno Counts                 | Subjects  | score X2 | score p-value | df | het OR | het OR 95% CI | het OR 95% CI | hom OR | hom OR 95% CI | hom OR 95% CI_u |
|----------|------|-------------|-----------------------------|-----------|----------|---------------|----|--------|---------------|---------------|--------|---------------|-----------------|
| STAGE1-3 | 3    | 0.220 0.243 | 5595 3136 452 3042 1901 333 | 9183 5276 | 21.32    | 0.00002348    | 2  | 1.11   | 1.04          | 1.20          | 1.36   | 1.17          | 1.57            |
| NHS      | 5    | 0.215 0.253 | 693 401 44 451 303 53       | 1138 807  | 9.62     | 0.0081544     | 2  | 1.16   | 0.96          | 1.40          | 1.85   | 1.22          | 2.81            |
| STAGE1-2 | 1    | 0.216 0.249 | 3402 1923 241 2095 1316 253 | 5566 3664 | 34.32    | 3.522E-08     | 2  | 1.11   | 1.02          | 1.21          | 1.70   | 1.42          | 2.05            |
| STAGE2   | 1    | 0.216 0.247 | 2709 1522 197 1644 1013 200 | 4428 2857 | 25.17    | 0.000003418   | 2  | 1.10   | 0.99          | 1.21          | 1.67   | 1.36          | 2.06            |
| CPSII    | 15   | 0.225 0.241 | 325 192 26 186 108 22       | 543 316   | 1.80     | 0.4061294     | 2  | 0.98   | 0.73          | 1.32          | 1.48   | 0.81          | 2.68            |
| PBCS1    | 4    | 0.217 0.272 | 308 173 23 186 139 26       | 504 351   | 6.86     | 0.0324023     | 2  | 1.33   | 1.00          | 1.77          | 1.87   | 1.04          | 3.38            |
| PLCO     | 21   | 0.223 0.232 | 577 359 37 261 166 21       | 973 448   | 0.65     | 0.7236238     | 2  | 1.02   | 0.81          | 1.29          | 1.25   | 0.72          | 2.19            |
| WHI      | 4    | 0.212 0.247 | 1499 798 111 1011 600 131   | 2408 1742 | 18.16    | 0.0001139     | 2  | 1.11   | 0.98          | 1.27          | 1.75   | 1.34          | 2.28            |

|          |    |             |                          |           |      |           |   |      |      |      |      |      |      |
|----------|----|-------------|--------------------------|-----------|------|-----------|---|------|------|------|------|------|------|
| STAGE3   | 6  | 0.226 0.231 | 2193 1215 211 948 587 79 | 3619 1614 | 4.94 | 0.0844957 | 2 | 1.12 | 0.99 | 1.27 | 0.87 | 0.66 | 1.13 |
| NHS2     | 12 | 0.227 0.232 | 712 397 69 205 131 16    | 1178 352  | 2.03 | 0.3625487 | 2 | 1.15 | 0.89 | 1.47 | 0.81 | 0.46 | 1.42 |
| PBCS2    | 9  | 0.223 0.233 | 1070 586 98 417 254 38   | 1754 709  | 1.31 | 0.5189829 | 2 | 1.11 | 0.92 | 1.34 | 0.80 | 0.67 | 1.47 |
| WHS      | 8  | 0.233 0.228 | 411 232 44 326 202 25    | 687 553   | 2.66 | 0.2645721 | 2 | 1.10 | 0.87 | 1.39 | 0.72 | 0.43 | 1.20 |
| PBCS 1+2 | 3  | 0.221 0.246 | 1378 757 121 602 391 65  | 2256 1058 | 5.29 | 0.0708344 | 2 | 1.18 | 1.01 | 1.38 | 1.23 | 0.90 | 1.69 |

Locus Alleles Chr Location Neighborhood  
rs9491859 C|A 6q22.33 128106056 C6orf190

| SUBSET   | Rank | MAF         | Geno Counts                  | Subjects  | score X2 | score p-value | df | het OR | het OR 95% CI | het OR 95% CI | hom OR | hom OR 95% CI | hom OR 95% CI_u |
|----------|------|-------------|------------------------------|-----------|----------|---------------|----|--------|---------------|---------------|--------|---------------|-----------------|
| STAGE1-3 | 4    | 0.352 0.376 | 3857 4174 1135 2089 2392 784 | 9166 5265 | 20.51    | 0.00003516    | 2  | 1.06   | 0.98          | 1.14          | 1.28   | 1.15          | 1.42            |
| NHS      | 13   | 0.356 0.375 | 459 551 130 325 359 123      | 1140 807  | 6.85     | 0.0324952     | 2  | 0.92   | 0.76          | 1.12          | 1.34   | 1.01          | 1.78            |
| STAGE1-2 | 6    | 0.348 0.376 | 2351 2568 655 1462 1649 555  | 5574 3666 | 22.79    | 0.00001124    | 2  | 1.03   | 0.94          | 1.13          | 1.36   | 1.20          | 1.55            |
| STAGE2   | 8    | 0.346 0.377 | 1892 2017 525 1137 1290 432  | 4434 2859 | 17.74    | 0.0001407     | 2  | 1.06   | 0.96          | 1.18          | 1.37   | 1.18          | 1.59            |
| CPSII    | 9    | 0.350 0.351 | 220 266 57 137 136 43        | 543 316   | 3.56     | 0.1688074     | 2  | 0.82   | 0.61          | 1.10          | 1.21   | 0.77          | 1.90            |
| PBCS1    | 17   | 0.345 0.364 | 216 231 59 147 154 51        | 506 352   | 1.50     | 0.4711921     | 2  | 0.98   | 0.73          | 1.31          | 1.27   | 0.83          | 1.95            |
| PLCO     | 5    | 0.333 0.376 | 437 427 111 170 219 59       | 975 448   | 5.97     | 0.0505344     | 2  | 1.32   | 1.04          | 1.68          | 1.37   | 0.95          | 1.96            |
| WHI      | 6    | 0.350 0.384 | 1019 1093 298 683 781 279    | 2410 1743 | 12.09    | 0.0023713     | 2  | 1.07   | 0.93          | 1.22          | 1.40   | 1.16          | 1.69            |
| STAGE3   | 11   | 0.357 0.375 | 1507 1610 480 628 743 229    | 3597 1600 | 3.34     | 0.1885581     | 2  | 1.11   | 0.98          | 1.26          | 1.14   | 0.95          | 1.37            |
| NHS2     | 23   | 0.367 0.366 | 482 523 170 147 152 53       | 1175 352  | 0.21     | 0.9010014     | 2  | 0.95   | 0.74          | 1.23          | 1.02   | 0.71          | 1.46            |
| PBCS2    | 11   | 0.349 0.365 | 744 779 218 286 322 96       | 1741 704  | 1.12     | 0.5699303     | 2  | 1.08   | 0.89          | 1.30          | 1.15   | 0.87          | 1.51            |
| WHS      | 5    | 0.361 0.394 | 281 308 92 195 269 80        | 681 544   | 3.74     | 0.1544191     | 2  | 1.26   | 0.98          | 1.61          | 1.25   | 0.88          | 1.78            |
| PBCS 1+2 | 12   | 0.348 0.365 | 959 1006 277 432 476 147     | 2242 1055 | 1.97     | 0.3739565     | 2  | 1.05   | 0.90          | 1.23          | 1.18   | 0.94          | 1.48            |

Locus Alleles Chr Location Neighborhood  
rs7121523 G|A 11p15.4 7556781 PPFIBP2

| SUBSET   | Rank | MAF         | Geno Counts                 | Subjects  | score X2 | score p-value | df | het OR | het OR 95% CI | het OR 95% CI | hom OR | hom OR 95% CI | hom OR 95% CI_u |
|----------|------|-------------|-----------------------------|-----------|----------|---------------|----|--------|---------------|---------------|--------|---------------|-----------------|
| STAGE1-3 | 5    | 0.156 0.161 | 6502 2482 193 3746 1354 170 | 9177 5270 | 19.13    | 0.00007022    | 2  | 0.95   | 0.88          | 1.02          | 1.53   | 1.24          | 1.89            |
| NHS      | 14   | 0.159 0.168 | 807 306 28 572 199 36       | 1141 807  | 6.65     | 0.0360286     | 2  | 0.92   | 0.75          | 1.13          | 1.81   | 1.09          | 3.01            |
| STAGE1-2 | 4    | 0.156 0.161 | 3940 1525 106 2613 923 129  | 5571 3665 | 26.82    | 0.000001499   | 2  | 0.91   | 0.83          | 1.00          | 1.84   | 1.41          | 2.38            |
| STAGE2   | 4    | 0.155 0.159 | 3133 1219 78 2041 724 93    | 4430 2858 | 19.74    | 0.00005177    | 2  | 0.91   | 0.82          | 1.02          | 1.83   | 1.35          | 2.49            |
| CPSII    | 13   | 0.173 0.171 | 368 161 13 220 84 12        | 542 316   | 2.11     | 0.3483875     | 2  | 0.87   | 0.64          | 1.19          | 1.54   | 0.69          | 3.44            |
| PBCS1    | 1    | 0.138 0.156 | 373 123 8 259 76 17         | 504 352   | 8.17     | 0.0168166     | 2  | 0.89   | 0.64          | 1.23          | 3.06   | 1.30          | 7.20            |
| PLCO     | 12   | 0.156 0.160 | 688 270 17 318 117 13       | 975 448   | 2.24     | 0.3260978     | 2  | 0.94   | 0.73          | 1.21          | 1.65   | 0.79          | 3.45            |
| WHI      | 9    | 0.155 0.158 | 1704 665 40 1244 447 51     | 2409 1742 | 8.90     | 0.0116905     | 2  | 0.92   | 0.80          | 1.06          | 1.75   | 1.15          | 2.66            |
| STAGE3   | 22   | 0.157 0.160 | 2562 957 86 1133 431 41     | 3605 1605 | 0.20     | 0.9026505     | 2  | 1.02   | 0.89          | 1.16          | 1.08   | 0.74          | 1.57            |
| NHS2     | 14   | 0.167 0.153 | 811 332 30 254 88 10        | 1173 352  | 1.51     | 0.4701615     | 2  | 0.85   | 0.64          | 1.11          | 1.06   | 0.51          | 2.21            |
| PBCS2    | 15   | 0.148 0.158 | 1266 440 38 496 184 18      | 1744 698  | 0.76     | 0.6840249     | 2  | 1.07   | 0.87          | 1.31          | 1.21   | 0.68          | 2.14            |
| WHS      | 20   | 0.161 0.167 | 485 185 18 383 159 13       | 688 555   | 0.53     | 0.7660745     | 2  | 1.09   | 0.85          | 1.40          | 0.91   | 0.44          | 1.89            |
| PBCS 1+2 | 4    | 0.146 0.157 | 1639 563 47 755 260 35      | 2249 1050 | 4.57     | 0.1019014     | 2  | 1.00   | 0.85          | 1.19          | 1.62   | 1.03          | 2.53            |

Locus Alleles Chr Location Neighborhood  
rs2303659 G|A 11q24.3 129326474 PRDM10

| SUBSET   | Rank | MAF         | Geno Counts            | Subjects  | score X2 | score p-value | df | het OR | het OR 95% CI | het OR 95% CI | hom OR | hom OR 95% CI | hom OR 95% CI_u |
|----------|------|-------------|------------------------|-----------|----------|---------------|----|--------|---------------|---------------|--------|---------------|-----------------|
| STAGE1-3 | 6    | 0.034 0.026 | 8545 608 10 4997 257 9 | 9163 5263 | 19.11    | 0.00007097    | 2  | 0.72   | 0.62          | 0.84          | 1.54   | 0.63          | 3.79            |
| NHS      | 22   | 0.034 0.026 | 1063 78 0 765 42 0     | 1141 807  |          |               |    |        |               |               |        |               |                 |
| STAGE1-2 | 16   | 0.034 0.025 | 5197 376 2 3487 178 2  | 5575 3667 | 14.19    | 0.0008299     | 2  | 0.71   | 0.59          | 0.85          | 1.49   | 0.21          | 10.59           |
| STAGE2   | 14   | 0.034 0.024 | 4134 298 2 2722 136 2  | 4434 2860 | 12.18    | 0.0022647     | 2  | 0.69   | 0.56          | 0.85          | 1.52   | 0.21          | 10.79           |
| CPSII    | 24   | 0.030 0.019 | 510 33 0 305 10 1      | 543 316   |          |               |    |        |               |               |        |               |                 |
| PBCS1    | 22   | 0.033 0.024 | 473 33 0 336 17 0      | 506 353   |          |               |    |        |               |               |        |               |                 |
| PLCO     | 24   | 0.036 0.026 | 906 68 1 425 23 0      | 975 448   |          |               |    |        |               |               |        |               |                 |
| WHI      | 13   | 0.034 0.025 | 2245 164 1 1656 86 1   | 2410 1743 | 6.31     | 0.0427406     | 2  | 0.71   | 0.54          | 0.93          | 1.36   | 0.08          | 21.69           |

|          |    |             |                      |           |      |           |   |      |      |      |      |      |       |
|----------|----|-------------|----------------------|-----------|------|-----------|---|------|------|------|------|------|-------|
| STAGE3   | 3  | 0.035 0.029 | 3348 232 8 1511 79 7 | 3588 1597 | 6.22 | 0.0444984 | 2 | 0.75 | 0.58 | 0.98 | 1.94 | 0.70 | 5.36  |
| NHS2     | 4  | 0.040 0.030 | 1074 82 5 334 15 3   | 1161 352  | 4.38 | 0.1119677 | 2 | 0.59 | 0.33 | 1.03 | 1.93 | 0.46 | 8.12  |
| PBCS2    | 24 | 0.032 0.028 | 1648 112 1 669 40 0  | 1761 709  |      |           |   |      |      |      |      |      |       |
| WHS      | 10 | 0.032 0.030 | 626 38 2 508 24 4    | 666 536   | 2.07 | 0.3550594 | 2 | 0.78 | 0.46 | 1.31 | 2.46 | 0.45 | 13.51 |
| PBCS 1+2 | 24 | 0.032 0.027 | 2121 145 1 1004 57 0 | 2267 1061 |      |           |   |      |      |      |      |      |       |

Locus Alleles Chr Location Neighborhood  
rs10850145 C|T 12q24.13 112428512

| SUBSET   | Rank | MAF         | Geno Counts               | Subjects  | score X2 | score p-value | df | het OR | het OR 95% CI | het OR 95% CI | hom OR | hom OR 95% CI | hom OR 95% CI_u |
|----------|------|-------------|---------------------------|-----------|----------|---------------|----|--------|---------------|---------------|--------|---------------|-----------------|
| STAGE1-3 | 7    | 0.094 0.109 | 7550 1579 79 4185 1048 54 | 9208 5287 | 17.57    | 0.0001531     | 2  | 1.20   | 1.10          | 1.31          | 1.23   | 0.87          | 1.75            |
| NHS      | 12   | 0.085 0.108 | 951 185 5 642 155 10      | 1141 807  | 7.20     | 0.0273758     | 2  | 1.24   | 0.98          | 1.57          | 2.96   | 1.01          | 8.71            |
| STAGE1-2 | 7    | 0.090 0.111 | 4627 896 52 2898 724 43   | 5575 3665 | 22.53    | 0.00001282    | 2  | 1.29   | 1.16          | 1.44          | 1.32   | 0.88          | 1.98            |
| STAGE2   | 5    | 0.091 0.111 | 3676 711 47 2256 569 33   | 4434 2858 | 18.36    | 0.0001029     | 2  | 1.30   | 1.15          | 1.47          | 1.14   | 0.73          | 1.79            |
| CPSII    | 18   | 0.099 0.111 | 444 90 9 250 62 4         | 543 316   | 1.42     | 0.4907231     | 2  | 1.22   | 0.85          | 1.75          | 0.79   | 0.24          | 2.59            |
| PBCS1    | 9    | 0.094 0.123 | 417 83 6 270 79 4         | 506 353   | 4.86     | 0.0882352     | 2  | 1.47   | 1.04          | 2.07          | 1.03   | 0.29          | 3.68            |
| PLCO     | 2    | 0.077 0.106 | 832 135 8 357 87 4        | 975 448   | 7.30     | 0.0259644     | 2  | 1.50   | 1.12          | 2.02          | 1.17   | 0.35          | 3.89            |
| WHI      | 14   | 0.094 0.110 | 1983 403 24 1379 341 21   | 2410 1741 | 6.22     | 0.0446059     | 2  | 1.22   | 1.04          | 1.43          | 1.26   | 0.70          | 2.27            |
| STAGE3   | 16   | 0.102 0.107 | 2923 684 27 1289 324 11   | 3634 1624 | 0.97     | 0.6154436     | 2  | 1.07   | 0.93          | 1.24          | 0.92   | 0.46          | 1.87            |
| NHS2     | 13   | 0.103 0.100 | 947 218 12 290 59 6       | 1177 355  | 1.64     | 0.4402611     | 2  | 0.88   | 0.64          | 1.21          | 1.63   | 0.61          | 4.39            |
| PBCS2    | 18   | 0.104 0.107 | 1412 338 15 565 143 5     | 1765 713  | 0.39     | 0.822758      | 2  | 1.06   | 0.85          | 1.32          | 0.83   | 0.30          | 2.30            |
| WHS      | 24   | 0.092 0.110 | 564 128 0 434 122 0       | 692 556   |          |               |    |        |               |               |        |               |                 |
| PBCS 1+2 | 10   | 0.102 0.113 | 1829 420 21 833 222 9     | 2270 1064 | 2.62     | 0.2693796     | 2  | 1.16   | 0.97          | 1.39          | 0.94   | 0.43          | 2.06            |

Locus Alleles Chr Location Neighborhood  
rs12608723 A|G 19q13.11 38508973

| SUBSET   | Rank | MAF         | Geno Counts                | Subjects  | score X2 | score p-value | df | het OR | het OR 95% CI | het OR 95% CI | hom OR | hom OR 95% CI | hom OR 95% CI_u |
|----------|------|-------------|----------------------------|-----------|----------|---------------|----|--------|---------------|---------------|--------|---------------|-----------------|
| STAGE1-3 | 8    | 0.137 0.121 | 6878 2122 195 4075 1120 78 | 9195 5273 | 15.08    | 0.0005319     | 2  | 0.89   | 0.82          | 0.97          | 0.68   | 0.52          | 0.88            |
| NHS      | 8    | 0.153 0.121 | 818 296 27 624 169 13      | 1141 806  | 8.29     | 0.0158325     | 2  | 0.75   | 0.60          | 0.93          | 0.63   | 0.32          | 1.23            |
| STAGE1-2 | 12   | 0.143 0.121 | 4102 1351 122 2831 783 52  | 5575 3666 | 18.79    | 0.00008301    | 2  | 0.84   | 0.76          | 0.93          | 0.62   | 0.44          | 0.86            |
| STAGE2   | 15   | 0.140 0.121 | 3284 1055 95 2207 614 39   | 4434 2860 | 12.07    | 0.0023898     | 2  | 0.87   | 0.77          | 0.97          | 0.61   | 0.42          | 0.89            |
| CPSII    | 5    | 0.140 0.114 | 398 138 7 250 60 6         | 543 316   | 4.97     | 0.0834805     | 2  | 0.69   | 0.49          | 0.97          | 1.36   | 0.45          | 4.11            |
| PBCS1    | 3    | 0.153 0.110 | 364 129 13 278 72 3        | 506 353   | 6.90     | 0.0317149     | 2  | 0.73   | 0.53          | 1.01          | 0.30   | 0.09          | 1.07            |
| PLCO     | 10   | 0.132 0.116 | 738 216 21 348 96 4        | 975 448   | 3.01     | 0.2219578     | 2  | 0.94   | 0.72          | 1.24          | 0.40   | 0.14          | 1.19            |
| WHI      | 16   | 0.141 0.126 | 1784 572 54 1331 386 26    | 2410 1743 | 4.79     | 0.0912078     | 2  | 0.90   | 0.78          | 1.05          | 0.65   | 0.40          | 1.04            |
| STAGE3   | 15   | 0.127 0.122 | 2778 774 73 1244 340 26    | 3625 1610 | 1.02     | 0.5990943     | 2  | 0.98   | 0.85          | 1.13          | 0.80   | 0.51          | 1.25            |
| NHS2     | 20   | 0.127 0.117 | 907 259 21 272 72 5        | 1187 349  | 0.44     | 0.8028168     | 2  | 0.93   | 0.69          | 1.24          | 0.79   | 0.30          | 2.13            |
| PBCS2    | 20   | 0.124 0.119 | 1344 368 32 554 145 12     | 1744 711  | 0.23     | 0.8915869     | 2  | 0.96   | 0.77          | 1.19          | 0.91   | 0.47          | 1.78            |
| WHS      | 9    | 0.135 0.128 | 527 147 20 418 123 9       | 694 550   | 2.24     | 0.3263727     | 2  | 1.05   | 0.80          | 1.38          | 0.57   | 0.26          | 1.26            |
| PBCS 1+2 | 8    | 0.130 0.115 | 1706 494 45 832 214 15     | 2245 1061 | 3.07     | 0.2154655     | 2  | 0.89   | 0.74          | 1.06          | 0.68   | 0.38          | 1.23            |

Locus Alleles Chr Location Neighborhood  
rs12622050 G|A 2q11.2 100945886 NPAS2

| SUBSET   | Rank | MAF         | Geno Counts                 | Subjects  | score X2 | score p-value | df | het OR | het OR 95% CI | het OR 95% CI | hom OR | hom OR 95% CI | hom OR 95% CI_u |
|----------|------|-------------|-----------------------------|-----------|----------|---------------|----|--------|---------------|---------------|--------|---------------|-----------------|
| STAGE1-3 | 9    | 0.225 0.208 | 5470 3225 447 3307 1695 246 | 9142 5248 | 14.47    | 0.0007227     | 2  | 0.87   | 0.81          | 0.94          | 0.91   | 0.77          | 1.07            |
| NHS      | 16   | 0.220 0.189 | 694 392 55 529 251 27       | 1141 807  | 5.64     | 0.059612      | 2  | 0.84   | 0.69          | 1.02          | 0.64   | 0.40          | 1.03            |
| STAGE1-2 | 11   | 0.220 0.200 | 3355 1980 239 2361 1141 162 | 5574 3664 | 19.10    | 0.00007126    | 2  | 0.82   | 0.75          | 0.90          | 0.96   | 0.78          | 1.18            |
| STAGE2   | 9    | 0.221 0.203 | 2661 1588 184 1832 890 135  | 4433 2857 | 17.19    | 0.000185      | 2  | 0.81   | 0.74          | 0.90          | 1.07   | 0.85          | 1.34            |
| CPSII    | 1    | 0.217 0.213 | 323 203 16 201 94 20        | 542 315   | 9.38     | 0.0091704     | 2  | 0.74   | 0.55          | 1.01          | 2.01   | 1.02          | 3.97            |
| PBCS1    | 12   | 0.244 0.249 | 284 197 25 204 121 27       | 506 352   | 3.84     | 0.1467675     | 2  | 0.86   | 0.64          | 1.14          | 1.50   | 0.85          | 2.67            |
| PLCO     | 8    | 0.229 0.195 | 577 350 48 288 145 15       | 975 448   | 4.14     | 0.1263961     | 2  | 0.83   | 0.65          | 1.05          | 0.63   | 0.34          | 1.14            |
| WHI      | 11   | 0.213 0.194 | 1477 838 95 1139 530 73     | 2410 1742 | 8.65     | 0.0132398     | 2  | 0.82   | 0.72          | 0.94          | 1.00   | 0.73          | 1.37            |

|          |    |             |                          |           |      |           |   |      |      |      |      |      |      |
|----------|----|-------------|--------------------------|-----------|------|-----------|---|------|------|------|------|------|------|
| STAGE3   | 19 | 0.233 0.227 | 2116 1247 208/947 555 83 | 3571 1585 | 0.72 | 0.69753   | 2 | 0.99 | 0.88 | 1.13 | 0.89 | 0.68 | 1.16 |
| NHS2     | 15 | 0.205 0.215 | 734 358 56/210 117 15    | 1148 342  | 1.16 | 0.5605433 | 2 | 1.14 | 0.88 | 1.48 | 0.94 | 0.52 | 1.69 |
| PBCS2    | 19 | 0.252 0.245 | 980 644 117/402 254 45   | 1741 701  | 0.24 | 0.8848714 | 2 | 0.96 | 0.80 | 1.16 | 0.94 | 0.65 | 1.35 |
| WHS      | 15 | 0.231 0.212 | 402 245 35/335 184 23    | 682 542   | 1.25 | 0.5350964 | 2 | 0.90 | 0.71 | 1.15 | 0.79 | 0.46 | 1.36 |
| PBCS 1+2 | 15 | 0.250 0.247 | 1263 839 142/605 374 73  | 2244 1052 | 1.26 | 0.5333777 | 2 | 0.93 | 0.80 | 1.09 | 1.07 | 0.80 | 1.45 |

Locus Alleles Chr Location Neighborhood  
rs2067980 A|G 5p12 45018074

| SUBSET   | Rank | MAF         | Geno Counts                 | Subjects  | score X2 | score p-value | df | het OR | het OR 95% CI | het OR 95% CI | hom OR | hom OR 95% CI | hom OR 95% CI_u |
|----------|------|-------------|-----------------------------|-----------|----------|---------------|----|--------|---------------|---------------|--------|---------------|-----------------|
| STAGE1-3 | 10   | 0.161 0.176 | 6467 2446 251/3610 1460 197 | 9164 5267 | 14.08    | 0.0008754     | 2  | 1.07   | 0.99          | 1.15          | 1.41   | 1.16          | 1.70            |
| NHS      | 11   | 0.151 0.179 | 814 310 17/542 240 24       | 1141 806  | 7.24     | 0.0267956     | 2  | 1.16   | 0.95          | 1.42          | 2.12   | 1.13          | 3.98            |
| STAGE1-2 | 3    | 0.151 0.176 | 4007 1454 114/2510 1021 135 | 5575 3666 | 28.24    | 7.373E-07     | 2  | 1.12   | 1.02          | 1.23          | 1.89   | 1.47          | 2.44            |
| STAGE2   | 2    | 0.151 0.175 | 3193 1144 97/1968 781 111   | 4434 2860 | 21.50    | 0.00002147    | 2  | 1.11   | 1.00          | 1.23          | 1.86   | 1.41          | 2.45            |
| CPSII    | 14   | 0.159 0.171 | 383 147 13/221 82 13        | 543 316   | 2.06     | 0.3576262     | 2  | 0.97   | 0.70          | 1.33          | 1.73   | 0.79          | 3.80            |
| PBCS1    | 10   | 0.191 0.231 | 335 149 22/208 127 18       | 506 353   | 4.76     | 0.0927096     | 2  | 1.37   | 1.02          | 1.84          | 1.32   | 0.69          | 2.52            |
| PLCO     | 16   | 0.144 0.156 | 714 241 20/322 112 14       | 975 448   | 1.57     | 0.4564752     | 2  | 1.03   | 0.79          | 1.34          | 1.55   | 0.77          | 3.11            |
| WHI      | 3    | 0.143 0.170 | 1761 607 42/1217 460 66     | 2410 1743 | 18.31    | 0.0001058     | 2  | 1.10   | 0.95          | 1.26          | 2.27   | 1.53          | 3.37            |
| STAGE3   | 24   | 0.176 0.176 | 2460 993 137/1100 440 62    | 3590 1602 | 0.03     | 0.9866891     | 2  | 0.99   | 0.87          | 1.13          | 1.01   | 0.74          | 1.38            |
| NHS2     | 16   | 0.170 0.162 | 810 306 44/249 82 15        | 1160 346  | 1.12     | 0.5723347     | 2  | 0.87   | 0.66          | 1.16          | 1.11   | 0.61          | 2.03            |
| PBCS2    | 21   | 0.190 0.188 | 1158 519 73/467 211 27      | 1750 705  | 0.16     | 0.9245628     | 2  | 1.01   | 0.83          | 1.22          | 0.92   | 0.58          | 1.44            |
| WHS      | 17   | 0.153 0.170 | 492 168 20/384 147 20       | 680 551   | 1.21     | 0.5460528     | 2  | 1.12   | 0.87          | 1.45          | 1.28   | 0.68          | 2.42            |
| PBCS 1+2 | 13   | 0.190 0.202 | 1493 667 95/675 337 45      | 2255 1057 | 1.87     | 0.3926005     | 2  | 1.12   | 0.95          | 1.31          | 1.05   | 0.73          | 1.51            |

Locus Alleles Chr Location Neighborhood  
rs4415084 C|T 5p12 44698272

| SUBSET   | Rank | MAF         | Geno Counts                  | Subjects  | score X2 | score p-value | df | het OR | het OR 95% CI | het OR 95% CI | hom OR | hom OR 95% CI | hom OR 95% CI_u |
|----------|------|-------------|------------------------------|-----------|----------|---------------|----|--------|---------------|---------------|--------|---------------|-----------------|
| STAGE1-3 | 11   | 0.408 0.430 | 3249 4351 1557/1736 2512 998 | 9157 5246 | 13.27    | 0.0013121     | 2  | 1.08   | 1.00          | 1.17          | 1.20   | 1.09          | 1.32            |
| NHS      | 2    | 0.392 0.437 | 429 513 185/240 421 139      | 1127 800  | 13.90    | 0.0009596     | 2  | 1.47   | 1.20          | 1.80          | 1.34   | 1.02          | 1.76            |
| STAGE1-2 | 20   | 0.403 0.428 | 1986 2660 913/1209 1769 681  | 5559 3659 | 10.81    | 0.0045        | 2  | 1.09   | 1.00          | 1.20          | 1.23   | 1.08          | 1.38            |
| STAGE2   | 20   | 0.406 0.425 | 1557 2147 728/969 1348 542   | 4432 2859 | 7.77     | 0.0205438     | 2  | 1.01   | 0.91          | 1.12          | 1.20   | 1.04          | 1.37            |
| CPSII    | 12   | 0.427 0.389 | 178 265 99/121 144 51        | 542 316   | 2.68     | 0.2618329     | 2  | 0.80   | 0.59          | 1.09          | 0.76   | 0.50          | 1.14            |
| PBCS1    | 8    | 0.410 0.463 | 174 249 83/97 185 71         | 506 353   | 5.16     | 0.075644      | 2  | 1.33   | 0.97          | 1.82          | 1.53   | 1.03          | 2.30            |
| PLCO     | 18   | 0.408 0.407 | 339 475 160/163 205 80       | 974 448   | 1.17     | 0.5572342     | 2  | 0.90   | 0.70          | 1.15          | 1.04   | 0.75          | 1.44            |
| WHI      | 10   | 0.400 0.429 | 866 1158 386/588 814 340     | 2410 1742 | 8.83     | 0.0120828     | 2  | 1.04   | 0.90          | 1.19          | 1.30   | 1.08          | 1.55            |
| STAGE3   | 7    | 0.414 0.434 | 1263 1694 645/528 747 319    | 3602 1594 | 3.85     | 0.1456004     | 2  | 1.05   | 0.92          | 1.21          | 1.18   | 1.00          | 1.40            |
| NHS2     | 2    | 0.399 0.447 | 436 540 199/111 161 74       | 1175 346  | 4.85     | 0.0886268     | 2  | 1.17   | 0.89          | 1.54          | 1.46   | 1.04          | 2.05            |
| PBCS2    | 12   | 0.424 0.440 | 593 833 328/226 346 140      | 1754 712  | 1.03     | 0.5981324     | 2  | 1.09   | 0.89          | 1.33          | 1.12   | 0.87          | 1.44            |
| WHS      | 14   | 0.414 0.420 | 234 321 118/191 240 105      | 673 536   | 1.30     | 0.5231269     | 2  | 0.92   | 0.71          | 1.18          | 1.09   | 0.79          | 1.51            |
| PBCS 1+2 | 5    | 0.421 0.447 | 767 1079 410/322 527 209     | 2256 1058 | 4.33     | 0.1147069     | 2  | 1.16   | 0.98          | 1.37          | 1.21   | 0.98          | 1.50            |

Locus Alleles Chr Location Neighborhood  
rs3134615 G|T 1p34.2 40134653 TRIT1,MYCL1

| SUBSET   | Rank | MAF         | Geno Counts                 | Subjects  | score X2 | score p-value | df | het OR | het OR 95% CI | het OR 95% CI | hom OR | hom OR 95% CI | hom OR 95% CI_u |
|----------|------|-------------|-----------------------------|-----------|----------|---------------|----|--------|---------------|---------------|--------|---------------|-----------------|
| STAGE1-3 | 12   | 0.226 0.243 | 5514 3211 475/3003 1970 297 | 9200 5270 | 12.12    | 0.0023401     | 2  | 1.13   | 1.05          | 1.21          | 1.15   | 0.99          | 1.34            |
| NHS      | 6    | 0.220 0.262 | 689 402 50/433 325 49       | 1141 807  | 9.59     | 0.0082689     | 2  | 1.29   | 1.06          | 1.55          | 1.56   | 1.03          | 2.35            |
| STAGE1-2 | 19   | 0.227 0.247 | 3314 1996 265/2072 1377 218 | 5575 3667 | 11.14    | 0.0038046     | 2  | 1.10   | 1.01          | 1.20          | 1.32   | 1.09          | 1.59            |
| STAGE2   | 21   | 0.228 0.243 | 2625 1594 215/1639 1052 169 | 4434 2860 | 5.11     | 0.0776195     | 2  | 1.06   | 0.96          | 1.17          | 1.26   | 1.02          | 1.55            |
| CPSII    | 11   | 0.215 0.222 | 326 200 17/193 106 17       | 543 316   | 3.19     | 0.2024462     | 2  | 0.90   | 0.67          | 1.20          | 1.69   | 0.84          | 3.39            |
| PBCS1    | 14   | 0.226 0.231 | 299 185 22/213 117 23       | 506 353   | 2.61     | 0.2711531     | 2  | 0.89   | 0.66          | 1.19          | 1.47   | 0.80          | 2.70            |
| PLCO     | 9    | 0.236 0.253 | 578 334 63/247 175 26       | 975 448   | 3.11     | 0.2116434     | 2  | 1.23   | 0.97          | 1.55          | 0.97   | 0.60          | 1.56            |
| WHI      | 18   | 0.228 0.247 | 1422 875 113/986 654 103    | 2410 1743 | 4.34     | 0.1143651     | 2  | 1.08   | 0.95          | 1.23          | 1.31   | 0.99          | 1.74            |

|          |    |             |                          |           |      |           |   |      |      |      |      |      |      |
|----------|----|-------------|--------------------------|-----------|------|-----------|---|------|------|------|------|------|------|
| STAGE3   | 2  | 0.226 0.235 | 2200 1215 210 931 595 80 | 3625 1606 | 6.71 | 0.0349251 | 2 | 1.16 | 1.02 | 1.31 | 0.90 | 0.69 | 1.18 |
| NHS2     | 6  | 0.225 0.244 | 724 388 73 196 131 19    | 1185 346  | 3.15 | 0.2068316 | 2 | 1.25 | 0.97 | 1.61 | 0.96 | 0.57 | 1.63 |
| PBCS2    | 22 | 0.226 0.225 | 1063 591 102 427 240 39  | 1756 706  | 0.09 | 0.9567059 | 2 | 1.01 | 0.84 | 1.22 | 0.95 | 0.65 | 1.40 |
| WHS      | 2  | 0.224 0.242 | 413 236 35 308 224 22    | 684 554   | 4.97 | 0.0832005 | 2 | 1.27 | 1.01 | 1.61 | 0.84 | 0.48 | 1.47 |
| PBCS 1+2 | 20 | 0.226 0.226 | 1362 776 124 640 355 61  | 2262 1056 | 0.23 | 0.8910475 | 2 | 0.97 | 0.83 | 1.14 | 1.05 | 0.76 | 1.44 |

Locus Alleles Chr Location Neighborhood  
rs17740709 A|G 12q21.31 81947471 TMTC2

| SUBSET   | Rank | MAF         | Geno Counts                 | Subjects  | score X2 | score p-value | df | het OR | het OR 95% CI | het OR 95% CI | hom OR | hom OR 95% CI | hom OR 95% CI_u |
|----------|------|-------------|-----------------------------|-----------|----------|---------------|----|--------|---------------|---------------|--------|---------------|-----------------|
| STAGE1-3 | 13   | 0.220 0.219 | 5556 3162 430 3251 1707 300 | 9148 5258 | 11.67    | 0.0029256     | 2  | 0.92   | 0.86          | 0.99          | 1.19   | 1.02          | 1.39            |
| NHS      | 9    | 0.218 0.222 | 691 402 48 502 251 54       | 1141 807  | 8.19     | 0.0166881     | 2  | 0.86   | 0.71          | 1.04          | 1.55   | 1.03          | 2.32            |
| STAGE1-2 | 5    | 0.218 0.216 | 3371 1979 225 2293 1165 209 | 5575 3667 | 23.61    | 0.000007462   | 2  | 0.87   | 0.79          | 0.95          | 1.37   | 1.12          | 1.66            |
| STAGE2   | 11   | 0.218 0.214 | 2680 1577 177 1791 914 155  | 4434 2860 | 15.76    | 0.000378      | 2  | 0.87   | 0.78          | 0.96          | 1.31   | 1.05          | 1.64            |
| CPSII    | 8    | 0.215 0.199 | 328 197 18 205 96 15        | 543 316   | 3.75     | 0.1535427     | 2  | 0.78   | 0.58          | 1.05          | 1.33   | 0.66          | 2.70            |
| PBCS1    | 13   | 0.242 0.245 | 282 203 21 203 127 23       | 506 353   | 3.32     | 0.1905468     | 2  | 0.87   | 0.65          | 1.16          | 1.52   | 0.82          | 2.82            |
| PLCO     | 22   | 0.214 0.218 | 603 326 46 277 147 24       | 975 448   | 0.29     | 0.8646557     | 2  | 0.98   | 0.77          | 1.25          | 1.14   | 0.68          | 1.90            |
| WHI      | 7    | 0.215 0.209 | 1467 851 92 1106 544 93     | 2410 1743 | 11.39    | 0.0033698     | 2  | 0.85   | 0.74          | 0.97          | 1.34   | 0.99          | 1.81            |
| STAGE3   | 20   | 0.223 0.228 | 2185 1184 205 958 544 91    | 3574 1593 | 0.53     | 0.7691026     | 2  | 1.05   | 0.92          | 1.19          | 1.01   | 0.78          | 1.31            |
| NHS2     | 24   | 0.211 0.211 | 723 368 59 214 112 16       | 1150 342  | 0.16     | 0.924608      | 2  | 1.03   | 0.79          | 1.33          | 0.92   | 0.52          | 1.63            |
| PBCS2    | 6    | 0.234 0.254 | 1042 597 112 398 260 50     | 1751 708  | 2.27     | 0.3209765     | 2  | 1.14   | 0.95          | 1.37          | 1.17   | 0.82          | 1.66            |
| WHS      | 22   | 0.213 0.204 | 420 219 34 346 172 25       | 673 543   | 0.28     | 0.8709        | 2  | 0.95   | 0.75          | 1.22          | 0.89   | 0.52          | 1.52            |
| PBCS 1+2 | 14   | 0.236 0.251 | 1324 799 133 601 385 73     | 2256 1059 | 1.80     | 0.4069963     | 2  | 1.06   | 0.91          | 1.24          | 1.21   | 0.89          | 1.63            |

Locus Alleles Chr Location Neighborhood  
rs17570439 T|C 1p34.2 40096797 TRIT1

| SUBSET   | Rank | MAF         | Geno Counts                 | Subjects  | score X2 | score p-value | df | het OR | het OR 95% CI | het OR 95% CI | hom OR | hom OR 95% CI | hom OR 95% CI_u |
|----------|------|-------------|-----------------------------|-----------|----------|---------------|----|--------|---------------|---------------|--------|---------------|-----------------|
| STAGE1-3 | 14   | 0.208 0.224 | 5732 3020 388 3177 1825 269 | 9140 5271 | 11.11    | 0.0038676     | 2  | 1.09   | 1.01          | 1.17          | 1.25   | 1.06          | 1.47            |
| NHS      | 4    | 0.204 0.245 | 718 381 42 457 304 46       | 1141 807  | 9.83     | 0.0073182     | 2  | 1.25   | 1.04          | 1.52          | 1.72   | 1.11          | 2.66            |
| STAGE1-2 | 13   | 0.207 0.228 | 3472 1895 208 2196 1270 201 | 5575 3667 | 17.65    | 0.0001474     | 2  | 1.06   | 0.97          | 1.16          | 1.53   | 1.25          | 1.87            |
| STAGE2   | 16   | 0.208 0.223 | 2754 1514 166 1739 966 155  | 4434 2860 | 11.65    | 0.0029592     | 2  | 1.01   | 0.91          | 1.12          | 1.48   | 1.18          | 1.86            |
| CPSII    | 10   | 0.196 0.201 | 343 187 13 203 99 14        | 543 316   | 3.25     | 0.1967888     | 2  | 0.89   | 0.66          | 1.21          | 1.82   | 0.84          | 3.95            |
| PBCS1    | 7    | 0.210 0.215 | 310 179 17 223 108 22       | 506 353   | 5.32     | 0.0698199     | 2  | 0.84   | 0.62          | 1.13          | 1.80   | 0.93          | 3.47            |
| PLCO     | 13   | 0.220 0.238 | 599 323 53 259 165 24       | 975 448   | 1.90     | 0.386993      | 2  | 1.18   | 0.93          | 1.50          | 1.05   | 0.63          | 1.73            |
| WHI      | 8    | 0.206 0.225 | 1502 825 83 1054 594 95     | 2410 1743 | 10.07    | 0.0065017     | 2  | 1.03   | 0.90          | 1.17          | 1.63   | 1.20          | 2.21            |
| STAGE3   | 4    | 0.208 0.215 | 2260 1126 180 981 555 68    | 3566 1604 | 5.49     | 0.0643239     | 2  | 1.14   | 1.00          | 1.29          | 0.87   | 0.65          | 1.16            |
| NHS2     | 3    | 0.206 0.232 | 730 346 61 201 125 17       | 1137 343  | 4.39     | 0.111261      | 2  | 1.31   | 1.01          | 1.70          | 1.01   | 0.58          | 1.77            |
| PBCS2    | 23   | 0.208 0.210 | 1111 557 86 448 228 35      | 1754 711  | 0.02     | 0.9877848     | 2  | 1.02   | 0.84          | 1.23          | 1.01   | 0.67          | 1.52            |
| WHS      | 3    | 0.214 0.213 | 419 223 33 332 202 16       | 675 550   | 4.30     | 0.1162584     | 2  | 1.14   | 0.90          | 1.45          | 0.61   | 0.33          | 1.13            |
| PBCS 1+2 | 16   | 0.208 0.211 | 1421 735 103 671 336 57     | 2259 1064 | 1.16     | 0.5586672     | 2  | 0.97   | 0.83          | 1.13          | 1.17   | 0.84          | 1.64            |

Locus Alleles Chr Location Neighborhood  
rs998592 G|A 16p13.13 11107179 CLEC16A

| SUBSET   | Rank | MAF         | Geno Counts                  | Subjects  | score X2 | score p-value | df | het OR | het OR 95% CI | het OR 95% CI | hom OR | hom OR 95% CI | hom OR 95% CI_u |
|----------|------|-------------|------------------------------|-----------|----------|---------------|----|--------|---------------|---------------|--------|---------------|-----------------|
| STAGE1-3 | 15   | 0.426 0.418 | 3060 4399 1711 1751 2638 885 | 9170 5274 | 9.48     | 0.008732      | 2  | 1.05   | 0.97          | 1.13          | 0.90   | 0.82          | 1.00            |
| NHS      | 3    | 0.424 0.429 | 405 502 232 253 415 139      | 1139 807  | 10.34    | 0.0056879     | 2  | 1.32   | 1.08          | 1.62          | 0.96   | 0.74          | 1.25            |
| STAGE1-2 | 17   | 0.438 0.425 | 1803 2653 1117 1181 1857 629 | 5573 3667 | 13.97    | 0.0009264     | 2  | 1.07   | 0.97          | 1.17          | 0.86   | 0.76          | 0.97            |
| STAGE2   | 18   | 0.442 0.423 | 1398 2151 885 928 1442 490   | 4434 2860 | 9.11     | 0.0104976     | 2  | 1.01   | 0.91          | 1.12          | 0.83   | 0.73          | 0.96            |
| CPSII    | 4    | 0.475 0.416 | 158 254 131 107 155 54       | 543 316   | 6.28     | 0.0433193     | 2  | 0.90   | 0.66          | 1.24          | 0.61   | 0.41          | 0.91            |
| PBCS1    | 6    | 0.415 0.368 | 186 220 100 141 164 48       | 506 353   | 5.55     | 0.0622139     | 2  | 0.98   | 0.73          | 1.32          | 0.63   | 0.42          | 0.95            |
| PLCO     | 14   | 0.419 0.393 | 324 485 166 162 220 66       | 975 448   | 1.79     | 0.4092199     | 2  | 0.91   | 0.71          | 1.16          | 0.80   | 0.56          | 1.12            |
| WHI      | 22   | 0.450 0.444 | 730 1192 488 518 903 322     | 2410 1743 | 2.85     | 0.2407326     | 2  | 1.07   | 0.93          | 1.23          | 0.93   | 0.78          | 1.11            |



|          |    |             |                           |           |      |           |   |      |      |      |      |      |      |
|----------|----|-------------|---------------------------|-----------|------|-----------|---|------|------|------|------|------|------|
| STAGE3   | 21 | 0.408 0.402 | 1257 1746 595/570 782 256 | 3598 1608 | 0.34 | 0.8420297 | 2 | 0.99 | 0.87 | 1.12 | 0.95 | 0.80 | 1.13 |
| NHS2     | 22 | 0.418 0.423 | 394 568 202/119 167 65    | 1164 351  | 0.29 | 0.8648707 | 2 | 0.97 | 0.74 | 1.27 | 1.07 | 0.75 | 1.51 |
| PBCS2    | 13 | 0.400 0.386 | 625 849 274/266 333 105   | 1748 704  | 0.92 | 0.6300825 | 2 | 0.92 | 0.76 | 1.12 | 0.90 | 0.69 | 1.18 |
| WHS      | 13 | 0.413 0.410 | 238 329 119/185 282 86    | 686 553   | 1.31 | 0.5203624 | 2 | 1.10 | 0.86 | 1.42 | 0.93 | 0.66 | 1.30 |
| PBCS 1+2 | 7  | 0.403 0.380 | 811 1069 373/407 496 153  | 2253 1056 | 3.23 | 0.1986139 | 2 | 0.92 | 0.79 | 1.08 | 0.82 | 0.65 | 1.02 |

Locus Alleles Chr Location Neighborhood  
rs37936 A|G 7q21.11 79806994

| SUBSET   | Rank | MAF         | Geno Counts                  | Subjects  | score X2 | score p-value | df | het OR | het OR 95% ( | het OR 95% ( | hom OR | hom OR 95% | hom OR 95% CI_u |
|----------|------|-------------|------------------------------|-----------|----------|---------------|----|--------|--------------|--------------|--------|------------|-----------------|
| STAGE1-3 | 16   | 0.384 0.367 | 3487 4138 1398/2078 2378 707 | 9023 5163 | 9.35     | 0.0093318     | 2  | 0.96   | 0.90         | 1.04         | 0.85   | 0.76       | 0.94            |
| NHS      | 10   | 0.399 0.362 | 403 541 177/333 343 115      | 1121 791  | 7.44     | 0.0242844     | 2  | 0.77   | 0.63         | 0.94         | 0.79   | 0.60       | 1.04            |
| STAGE1-2 | 8    | 0.398 0.363 | 1839 2287 832/1325 1468 438  | 4958 3231 | 21.09    | 0.0000263     | 2  | 0.89   | 0.81         | 0.98         | 0.73   | 0.64       | 0.84            |
| STAGE2   | 6    | 0.398 0.363 | 1436 1746 655/992 1125 323   | 3837 2440 | 18.21    | 0.0001113     | 2  | 0.93   | 0.84         | 1.04         | 0.71   | 0.61       | 0.83            |
| CPSII    | 16   | 0.387 0.355 | 199 251 79/131 139 41        | 529 311   | 1.75     | 0.4165864     | 2  | 0.84   | 0.62         | 1.14         | 0.79   | 0.51       | 1.22            |
| PLCO     | 20   | 0.378 0.372 | 379 431 146/181 186 69       | 956 436   | 0.72     | 0.6989991     | 2  | 0.90   | 0.71         | 1.16         | 0.99   | 0.71       | 1.39            |
| WHI      | 1    | 0.409 0.362 | 858 1064 430/680 800 213     | 2352 1693 | 24.51    | 0.00004755    | 2  | 0.95   | 0.83         | 1.09         | 0.63   | 0.52       | 0.76            |
| STAGE3   | 12   | 0.368 0.374 | 1455 1636 504/624 763 219    | 3595 1606 | 1.81     | 0.4047359     | 2  | 1.09   | 0.96         | 1.24         | 1.01   | 0.84       | 1.22            |
| NHS2     | 7    | 0.371 0.399 | 475 529 171/128 174 56       | 1175 358  | 2.51     | 0.2850903     | 2  | 1.22   | 0.94         | 1.58         | 1.22   | 0.85       | 1.74            |
| PBCS2    | 10   | 0.368 0.360 | 706 782 248/283 324 88       | 1736 695  | 1.22     | 0.5441755     | 2  | 1.03   | 0.86         | 1.25         | 0.89   | 0.67       | 1.17            |
| WHS      | 21   | 0.362 0.375 | 274 325 85/213 265 75        | 684 553   | 0.50     | 0.7788482     | 2  | 1.05   | 0.82         | 1.34         | 1.14   | 0.79       | 1.62            |
| PBCS 1+2 | 19   | 0.367 0.366 | 899 997 310/412 471 138      | 2206 1021 | 0.31     | 0.8578505     | 2  | 1.03   | 0.88         | 1.21         | 0.97   | 0.77       | 1.23            |

Locus Alleles Chr Location Neighborhood  
rs1274466 T|C 10p11.21 34510210 PARD3

| SUBSET   | Rank | MAF         | Geno Counts                   | Subjects  | score X2 | score p-value | df | het OR | het OR 95% ( | het OR 95% ( | hom OR | hom OR 95% | hom OR 95% CI_u |
|----------|------|-------------|-------------------------------|-----------|----------|---------------|----|--------|--------------|--------------|--------|------------|-----------------|
| STAGE1-3 | 17   | 0.452 0.433 | 2783 4512 1894/1706 2563 1004 | 9189 5273 | 8.91     | 0.0116258     | 2  | 0.93   | 0.86         | 1.00         | 0.86   | 0.78       | 0.95            |
| NHS      | 15   | 0.470 0.436 | 312 585 244/261 388 158       | 1141 807  | 5.72     | 0.0571388     | 2  | 0.79   | 0.64         | 0.98         | 0.77   | 0.60       | 1.00            |
| STAGE1-2 | 18   | 0.456 0.429 | 1656 2756 1163/1213 1761 692  | 5575 3666 | 13.38    | 0.0012416     | 2  | 0.87   | 0.79         | 0.96         | 0.81   | 0.72       | 0.92            |
| STAGE2   | 19   | 0.452 0.427 | 1344 2171 919/952 1373 534    | 4434 2859 | 8.90     | 0.0116645     | 2  | 0.89   | 0.80         | 0.99         | 0.82   | 0.72       | 0.94            |
| CPSII    | 17   | 0.471 0.440 | 152 271 120/101 152 63        | 543 316   | 1.64     | 0.4405252     | 2  | 0.84   | 0.61         | 1.16         | 0.79   | 0.53       | 1.17            |
| PBCS1    | 18   | 0.483 0.457 | 138 247 121/104 174 74        | 506 352   | 1.16     | 0.5600817     | 2  | 0.93   | 0.68         | 1.29         | 0.81   | 0.55       | 1.19            |
| PLCO     | 1    | 0.449 0.391 | 298 478 199/167 212 69        | 975 448   | 8.51     | 0.0142283     | 2  | 0.79   | 0.62         | 1.02         | 0.62   | 0.44       | 0.86            |
| WHI      | 23   | 0.443 0.428 | 756 1175 479/580 835 328      | 2410 1743 | 1.88     | 0.391459      | 2  | 0.93   | 0.81         | 1.07         | 0.89   | 0.75       | 1.07            |
| STAGE3   | 18   | 0.445 0.444 | 1127 1760 732/493 802 313     | 3619 1608 | 0.76     | 0.6847273     | 2  | 1.04   | 0.91         | 1.19         | 0.98   | 0.83       | 1.16            |
| NHS2     | 19   | 0.441 0.429 | 379 559 240/114 168 65        | 1178 347  | 0.45     | 0.7979345     | 2  | 1.00   | 0.76         | 1.31         | 0.90   | 0.64       | 1.27            |
| PBCS2    | 16   | 0.457 0.451 | 518 863 368/211 357 141       | 1749 709  | 0.43     | 0.8060089     | 2  | 1.02   | 0.83         | 1.24         | 0.94   | 0.73       | 1.21            |
| WHS      | 16   | 0.423 0.445 | 230 338 124/168 277 107       | 692 552   | 1.22     | 0.5434596     | 2  | 1.12   | 0.87         | 1.45         | 1.18   | 0.85       | 1.64            |
| PBCS 1+2 | 17   | 0.463 0.452 | 656 1106 488/315 531 214      | 2250 1060 | 0.97     | 0.615556      | 2  | 1.00   | 0.84         | 1.18         | 0.91   | 0.74       | 1.13            |

Locus Alleles Chr Location Neighborhood  
rs11077820 T|C 17q25.1 71966263 UBE2O, AANAT

| SUBSET   | Rank | MAF         | Geno Counts                  | Subjects  | score X2 | score p-value | df | het OR | het OR 95% ( | het OR 95% ( | hom OR | hom OR 95% | hom OR 95% CI_u |
|----------|------|-------------|------------------------------|-----------|----------|---------------|----|--------|--------------|--------------|--------|------------|-----------------|
| STAGE1-3 | 18   | 0.372 0.367 | 3584 4307 1250/2153 2342 760 | 9141 5255 | 8.78     | 0.0123817     | 2  | 0.91   | 0.84         | 0.97         | 1.01   | 0.91       | 1.12            |
| NHS      | 17   | 0.382 0.374 | 429 553 159/329 353 125      | 1141 807  | 4.27     | 0.1181391     | 2  | 0.83   | 0.68         | 1.01         | 1.03   | 0.78       | 1.35            |
| STAGE1-2 | 9    | 0.380 0.368 | 2081 2738 749/1502 1623 538  | 5568 3663 | 20.99    | 0.00002761    | 2  | 0.82   | 0.75         | 0.90         | 1.00   | 0.87       | 1.13            |
| STAGE2   | 10   | 0.380 0.367 | 1652 2185 590/1173 1270 413  | 4427 2856 | 16.67    | 0.0002394     | 2  | 0.82   | 0.74         | 0.91         | 0.99   | 0.85       | 1.14            |
| CPSII    | 20   | 0.377 0.359 | 216 242 83/131 143 42        | 541 316   | 0.70     | 0.7037904     | 2  | 0.97   | 0.72         | 1.31         | 0.83   | 0.54       | 1.28            |
| PBCS1    | 11   | 0.375 0.334 | 193 244 67/160 150 43        | 504 353   | 4.27     | 0.1179577     | 2  | 0.74   | 0.55         | 0.99         | 0.77   | 0.50       | 1.20            |
| PLCO     | 11   | 0.371 0.354 | 371 484 120/188 200 58       | 975 446   | 2.89     | 0.2356811     | 2  | 0.82   | 0.64         | 1.04         | 0.95   | 0.67       | 1.37            |
| WHI      | 5    | 0.385 0.378 | 872 1215 320/694 777 270     | 2407 1741 | 14.21    | 0.0008207     | 2  | 0.80   | 0.70         | 0.92         | 1.06   | 0.88       | 1.28            |
| STAGE3   | 17   | 0.360 0.365 | 1503 1568 502/651 720 222    | 3573 1593 | 0.82     | 0.6639517     | 2  | 1.06   | 0.93         | 1.20         | 1.02   | 0.85       | 1.23            |

|          |    |             |                          |           |      |           |   |      |      |      |      |      |      |
|----------|----|-------------|--------------------------|-----------|------|-----------|---|------|------|------|------|------|------|
| NHS2     | 21 | 0.364 0.373 | 470 516 158 136 163 48   | 1144 347  | 0.44 | 0.8031004 | 2 | 1.09 | 0.84 | 1.42 | 1.05 | 0.72 | 1.53 |
| PBCS2    | 4  | 0.359 0.382 | 732 784 238/269 335 102  | 1754 706  | 2.75 | 0.2527387 | 2 | 1.16 | 0.96 | 1.41 | 1.17 | 0.89 | 1.53 |
| WHS      | 12 | 0.356 0.339 | 301 268 106/246 222 72   | 675 540   | 1.36 | 0.5066929 | 2 | 1.01 | 0.79 | 1.29 | 0.83 | 0.59 | 1.17 |
| PBCS 1+2 | 23 | 0.362 0.366 | 925 1029 304/429 484 145 | 2258 1058 | 0.07 | 0.9672004 | 2 | 1.01 | 0.87 | 1.19 | 1.03 | 0.82 | 1.29 |

Locus Alleles Chr Location Neighborhood  
rs10941679 A|G 5p12 44742255

| SUBSET   | Rank | MAF         | Geno Counts               | Subjects  | score X2 | score p-value | df | het OR | het OR 95% CI | het OR 95% CI | hom OR | hom OR 95% CI | hom OR 95% CI_u |
|----------|------|-------------|---------------------------|-----------|----------|---------------|----|--------|---------------|---------------|--------|---------------|-----------------|
| STAGE1-3 | 19   | 0.259 0.282 | 2233 1539 281/991 791 148 | 4053 1930 | 7.44     | 0.0242264     | 2  | 1.16   | 1.03          | 1.30          | 1.19   | 0.96          | 1.47            |
| STAGE3   | 5    | 0.259 0.277 | 1977 1345 254/830 650 118 | 3576 1598 | 5.09     | 0.078515      | 2  | 1.15   | 1.02          | 1.30          | 1.11   | 0.88          | 1.40            |
| NHS2     | 10   | 0.255 0.283 | 637 430 76/181 137 30     | 1143 348  | 2.35     | 0.3095378     | 2  | 1.12   | 0.87          | 1.44          | 1.39   | 0.88          | 2.19            |
| PBCS2    | 2    | 0.259 0.288 | 969 667 121/350 308 50    | 1757 708  | 7.02     | 0.0298986     | 2  | 1.28   | 1.07          | 1.53          | 1.14   | 0.81          | 1.63            |
| WHS      | 18   | 0.268 0.259 | 371 248 57/299 205 38     | 676 542   | 0.89     | 0.6416152     | 2  | 1.03   | 0.81          | 1.30          | 1.14   | 0.53          | 1.28            |
| PBCS 1+2 | 2    | 0.259 0.293 | 1225 861 148/511 449 80   | 2234 1040 | 9.31     | 0.0094913     | 2  | 1.25   | 1.07          | 1.46          | 1.30   | 0.97          | 1.73            |

Locus Alleles Chr Location Neighborhood  
rs7936636 C|T 11p11.2 44397546

| SUBSET   | Rank | MAF         | Geno Counts                 | Subjects  | score X2 | score p-value | df | het OR | het OR 95% CI | het OR 95% CI | hom OR | hom OR 95% CI | hom OR 95% CI_u |
|----------|------|-------------|-----------------------------|-----------|----------|---------------|----|--------|---------------|---------------|--------|---------------|-----------------|
| STAGE1-3 | 20   | 0.258 0.249 | 5016 3564 583/2989 1934 347 | 9163 5270 | 6.85     | 0.03255       | 2  | 0.91   | 0.85          | 0.98          | 1.00   | 0.87          | 1.15            |
| NHS      | 19   | 0.256 0.247 | 634 430 77/470 276 61       | 1141 807  | 2.62     | 0.2698838     | 2  | 0.87   | 0.71          | 1.05          | 1.07   | 0.75          | 1.53            |
| STAGE1-2 | 14   | 0.263 0.245 | 3002 2205 365/2117 1303 246 | 5572 3666 | 15.52    | 0.0004265     | 2  | 0.84   | 0.77          | 0.92          | 0.96   | 0.81          | 1.13            |
| STAGE2   | 12   | 0.265 0.244 | 2368 1775 288/1647 1027 185 | 4431 2859 | 13.22    | 0.0013496     | 2  | 0.83   | 0.75          | 0.92          | 0.92   | 0.76          | 1.12            |
| CPSII    | 2    | 0.266 0.222 | 286 224 32/197 98 21        | 542 316   | 9.09     | 0.0106288     | 2  | 0.64   | 0.47          | 0.86          | 0.95   | 0.53          | 1.70            |
| PBCS1    | 16   | 0.247 0.229 | 284 193 28/212 119 21       | 505 352   | 1.74     | 0.4182379     | 2  | 0.83   | 0.62          | 1.10          | 1.00   | 0.56          | 1.82            |
| PLCO     | 15   | 0.263 0.253 | 526 385 64/254 161 33       | 975 448   | 1.72     | 0.4230708     | 2  | 0.87   | 0.68          | 1.10          | 1.07   | 0.68          | 1.67            |
| WHI      | 15   | 0.270 0.249 | 1272 973 164/984 649 110    | 2409 1743 | 5.44     | 0.0659126     | 2  | 0.86   | 0.76          | 0.98          | 0.87   | 0.67          | 1.12            |
| STAGE3   | 13   | 0.250 0.259 | 2014 1359 218/872 631 100   | 3591 1603 | 1.29     | 0.5257763     | 2  | 1.07   | 0.95          | 1.21          | 1.06   | 0.83          | 1.36            |
| NHS2     | 11   | 0.264 0.241 | 630 457 79/204 123 23       | 1166 350  | 2.06     | 0.3575145     | 2  | 0.83   | 0.64          | 1.07          | 0.90   | 0.55          | 1.47            |
| PBCS2    | 3    | 0.245 0.268 | 993 643 105/372 282 47      | 1741 701  | 3.21     | 0.2013079     | 2  | 1.17   | 0.97          | 1.41          | 1.19   | 0.83          | 1.72            |
| WHS      | 11   | 0.239 0.259 | 391 259 34/296 226 30       | 684 552   | 1.55     | 0.4600568     | 2  | 1.15   | 0.91          | 1.46          | 1.17   | 0.70          | 1.95            |
| PBCS 1+2 | 18   | 0.245 0.256 | 1277 836 133/584 401 69     | 2246 1054 | 0.85     | 0.6523334     | 2  | 1.05   | 0.90          | 1.22          | 1.13   | 0.83          | 1.54            |

Locus Alleles Chr Location Neighborhood  
rs3817198 T|C 11p15.5 1865582 LSP1

| SUBSET   | Rank | MAF         | Geno Counts                 | Subjects  | score X2 | score p-value | df | het OR | het OR 95% CI | het OR 95% CI | hom OR | hom OR 95% CI | hom OR 95% CI_u |
|----------|------|-------------|-----------------------------|-----------|----------|---------------|----|--------|---------------|---------------|--------|---------------|-----------------|
| STAGE1-3 | 21   | 0.325 0.335 | 4170 4041 961/2368 2287 625 | 9172 5280 | 6.35     | 0.0418265     | 2  | 1.00   | 0.93          | 1.07          | 1.15   | 1.02          | 1.28            |
| NHS      | 18   | 0.318 0.328 | 524 509 108/373 339 95      | 1141 807  | 3.16     | 0.2062052     | 2  | 0.94   | 0.77          | 1.13          | 1.24   | 0.91          | 1.68            |
| STAGE1-2 | 22   | 0.326 0.337 | 2533 2437 597/1631 1595 436 | 5567 3662 | 3.24     | 0.1983568     | 2  | 1.02   | 0.93          | 1.11          | 1.13   | 0.99          | 1.30            |
| STAGE2   | 23   | 0.328 0.339 | 2009 1928 489/1258 1256 341 | 4426 2855 | 1.98     | 0.3720877     | 2  | 1.04   | 0.94          | 1.15          | 1.11   | 0.95          | 1.30            |
| CPSII    | 22   | 0.334 0.340 | 243 231 64/139 138 38       | 538 315   | 0.09     | 0.9571178     | 2  | 1.04   | 0.78          | 1.40          | 1.04   | 0.66          | 1.63            |
| PBCS1    | 21   | 0.319 0.326 | 229 228 47/161 150 39       | 504 350   | 0.96     | 0.6198844     | 2  | 0.94   | 0.70          | 1.25          | 1.18   | 0.74          | 1.89            |
| PLCO     | 7    | 0.335 0.334 | 440 417 118/190 215 42      | 975 447   | 4.43     | 0.1091681     | 2  | 1.19   | 0.94          | 1.51          | 1.02   | 0.56          | 1.22            |
| WHI      | 19   | 0.326 0.343 | 1097 1052 260/768 753 222   | 2409 1743 | 3.83     | 0.1471435     | 2  | 1.02   | 0.90          | 1.17          | 1.22   | 1.00          | 1.49            |
| STAGE3   | 10   | 0.324 0.331 | 1636 1605 364/734 693 189   | 3605 1616 | 3.37     | 0.1852493     | 2  | 0.96   | 0.85          | 1.09          | 1.16   | 0.95          | 1.41            |
| NHS2     | 18   | 0.320 0.331 | 538 516 117/162 155 41      | 1171 358  | 0.63     | 0.7290536     | 2  | 1.00   | 0.78          | 1.28          | 1.16   | 0.78          | 1.73            |
| PBCS2    | 8    | 0.330 0.330 | 789 789 189/326 301 84      | 1767 711  | 1.36     | 0.5075477     | 2  | 0.92   | 0.77          | 1.11          | 1.08   | 0.81          | 1.43            |
| WHS      | 7    | 0.312 0.334 | 309 300 58/246 237 64       | 667 547   | 3.01     | 0.2225459     | 2  | 0.99   | 0.78          | 1.26          | 1.39   | 0.94          | 2.05            |
| PBCS 1+2 | 11   | 0.328 0.327 | 1019 1016 236/490 450 123   | 2271 1063 | 2.13     | 0.3451118     | 2  | 0.92   | 0.79          | 1.08          | 1.08   | 0.85          | 1.38            |

Locus Alleles Chr Location Neighborhood  
rs724244 C|T 3p24.1 27217157 NEK10

| SUBSET   | Rank | MAF         | Geno Counts                 | Subjects  | score X2 | score p-value | df | het OR | het OR 95% CI | het OR 95% CI | hom OR | hom OR 95% CI | hom OR 95% CI_u |
|----------|------|-------------|-----------------------------|-----------|----------|---------------|----|--------|---------------|---------------|--------|---------------|-----------------|
| STAGE1-3 | 22   | 0.260 0.274 | 4413 3055 562/2365 1767 340 | 8030 4472 | 5.33     | 0.0695569     | 2  | 1.08   | 1.00          | 1.17          | 1.13   | 0.98          | 1.30            |
| STAGE1-2 | 21   | 0.252 0.275 | 2473 1688 272/1508 1131 220 | 4433 2859 | 10.19    | 0.0061213     | 2  | 1.10   | 1.00          | 1.21          | 1.33   | 1.10          | 1.60            |
| STAGE2   | 17   | 0.252 0.275 | 2473 1688 272/1508 1131 220 | 4433 2859 | 10.19    | 0.0061213     | 2  | 1.10   | 1.00          | 1.21          | 1.33   | 1.10          | 1.60            |
| CPSII    | 19   | 0.247 0.266 | 309 198 35/173 118 25       | 542 316   | 0.82     | 0.663283      | 2  | 1.06   | 0.79          | 1.43          | 1.28   | 0.74          | 2.20            |
| PBCS1    | 19   | 0.246 0.265 | 293 177 36/198 123 32       | 506 353   | 1.12     | 0.5711424     | 2  | 1.03   | 0.77          | 1.38          | 1.32   | 0.79          | 2.19            |
| PLCO     | 4    | 0.230 0.271 | 569 364 42/235 182 30       | 975 447   | 6.23     | 0.0444763     | 2  | 1.21   | 0.96          | 1.53          | 1.73   | 1.06          | 2.83            |
| WHI      | 21   | 0.263 0.279 | 1302 949 159/902 708 133    | 2410 1743 | 2.91     | 0.2330911     | 2  | 1.08   | 0.95          | 1.23          | 1.21   | 0.94          | 1.54            |
| STAGE3   | 14   | 0.271 0.272 | 1940 1371 290/857 636 120   | 3601 1613 | 1.18     | 0.553999      | 2  | 1.05   | 0.93          | 1.19          | 0.94   | 0.75          | 1.18            |
| NHS2     | 8    | 0.270 0.286 | 638 417 105/179 142 29      | 1160 350  | 2.47     | 0.290913      | 2  | 1.21   | 0.94          | 1.56          | 0.98   | 0.63          | 1.53            |
| PBCS2    | 17   | 0.273 0.265 | 926 696 131/381 280 48      | 1753 709  | 0.43     | 0.8073219     | 2  | 0.98   | 0.81          | 1.17          | 0.89   | 0.63          | 1.27            |
| WHS      | 23   | 0.266 0.271 | 376 258 54/297 214 43       | 688 554   | 0.17     | 0.9198272     | 2  | 1.05   | 0.83          | 1.33          | 1.01   | 0.66          | 1.55            |
| PBCS 1+2 | 21   | 0.267 0.265 | 1219 869 167/579 403 80     | 2255 1062 | 0.11     | 0.9467146     | 2  | 0.98   | 0.84          | 1.14          | 1.01   | 0.76          | 1.34            |

Locus Alleles Chr Location Neighborhood  
rs2391406 T|G 13q33.3 106586873

| SUBSET   | Rank | MAF         | Geno Counts                  | Subjects  | score X2 | score p-value | df | het OR | het OR 95% CI | het OR 95% CI | hom OR | hom OR 95% CI | hom OR 95% CI_u |
|----------|------|-------------|------------------------------|-----------|----------|---------------|----|--------|---------------|---------------|--------|---------------|-----------------|
| STAGE1-3 | 23   | 0.372 0.367 | 3658 4164 1315/2088 2463 694 | 9137 5245 | 4.64     | 0.098089      | 2  | 1.04   | 0.96          | 1.12          | 0.92   | 0.83          | 1.03            |
| NHS      | 20   | 0.371 0.366 | 452 529 159/323 377 107      | 1140 807  | 0.19     | 0.9091115     | 2  | 1.00   | 0.82          | 1.21          | 0.94   | 0.71          | 1.25            |
| STAGE1-2 | 15   | 0.374 0.363 | 2234 2499 829/1453 1759 451  | 5562 3663 | 15.41    | 0.0004516     | 2  | 1.08   | 0.99          | 1.18          | 0.84   | 0.73          | 0.95            |
| STAGE2   | 7    | 0.374 0.362 | 1782 1970 670/1130 1382 344  | 4422 2856 | 17.81    | 0.0001359     | 2  | 1.11   | 1.00          | 1.22          | 0.81   | 0.70          | 0.94            |
| CPSII    | 7    | 0.371 0.339 | 217 240 79/132 150 31        | 536 313   | 4.13     | 0.126954      | 2  | 1.03   | 0.76          | 1.38          | 0.65   | 0.40          | 1.03            |
| PBCS1    | 2    | 0.387 0.375 | 195 230 81/125 190 37        | 506 352   | 8.15     | 0.0169893     | 2  | 1.29   | 0.96          | 1.73          | 0.71   | 0.45          | 1.12            |
| PLCO     | 6    | 0.376 0.360 | 398 416 157/180 213 55       | 971 448   | 4.69     | 0.0959954     | 2  | 1.13   | 0.89          | 1.44          | 0.77   | 0.54          | 1.10            |
| WHI      | 17   | 0.372 0.365 | 972 1084 353/693 829 221     | 2409 1743 | 4.38     | 0.1118546     | 2  | 1.07   | 0.94          | 1.23          | 0.88   | 0.72          | 1.07            |
| STAGE3   | 9    | 0.369 0.376 | 1424 1669 486/635 705 243    | 3579 1583 | 3.52     | 0.1722382     | 2  | 0.95   | 0.83          | 1.08          | 1.12   | 0.94          | 1.34            |
| NHS2     | 1    | 0.344 0.402 | 510 503 148/129 162 60       | 1161 351  | 7.48     | 0.0238118     | 2  | 1.27   | 0.98          | 1.65          | 1.60   | 1.12          | 2.29            |
| PBCS2    | 5    | 0.380 0.381 | 656 853 236/275 321 108      | 1745 704  | 2.59     | 0.273464      | 2  | 0.90   | 0.74          | 1.09          | 1.09   | 0.84          | 1.43            |
| WHS      | 6    | 0.384 0.352 | 258 313 102/231 222 75       | 673 528   | 3.63     | 0.1624571     | 2  | 0.79   | 0.62          | 1.01          | 0.82   | 0.58          | 1.16            |
| PBCS 1+2 | 22   | 0.381 0.379 | 851 1079 317/400 510 145     | 2247 1055 | 0.08     | 0.9590551     | 2  | 1.01   | 0.86          | 1.18          | 0.97   | 0.77          | 1.22            |

Locus Alleles Chr Location Neighborhood  
rs4666451 G|A 2p24.1 19150424

| SUBSET   | Rank | MAF         | Geno Counts                  | Subjects  | score X2 | score p-value | df | het OR | het OR 95% CI | het OR 95% CI | hom OR | hom OR 95% CI | hom OR 95% CI_u |
|----------|------|-------------|------------------------------|-----------|----------|---------------|----|--------|---------------|---------------|--------|---------------|-----------------|
| STAGE1-3 | 24   | 0.394 0.386 | 2956 3804 1260/1679 2133 657 | 8020 4469 | 2.35     | 0.3087221     | 2  | 0.99   | 0.91          | 1.07          | 0.92   | 0.82          | 1.03            |
| STAGE1-2 | 23   | 0.397 0.384 | 1622 2102 710/1078 1366 416  | 4434 2860 | 3.05     | 0.2175458     | 2  | 0.98   | 0.88          | 1.08          | 0.88   | 0.76          | 1.02            |
| STAGE2   | 22   | 0.397 0.384 | 1622 2102 710/1078 1366 416  | 4434 2860 | 3.05     | 0.2175458     | 2  | 0.98   | 0.88          | 1.08          | 0.88   | 0.76          | 1.02            |
| CPSII    | 3    | 0.394 0.413 | 201 256 86/96 179 41         | 543 316   | 7.21     | 0.0271541     | 2  | 1.46   | 1.07          | 1.99          | 1.00   | 0.64          | 1.56            |
| PBCS1    | 15   | 0.409 0.375 | 176 246 84/140 161 52        | 506 353   | 2.20     | 0.3327234     | 2  | 0.82   | 0.61          | 1.11          | 0.78   | 0.52          | 1.17            |
| PLCO     | 17   | 0.393 0.394 | 355 474 146/170 203 75       | 975 448   | 1.52     | 0.4683453     | 2  | 0.89   | 0.70          | 1.14          | 1.07   | 0.77          | 1.50            |
| WHI      | 20   | 0.397 0.378 | 890 1126 394/672 823 248     | 2410 1743 | 3.70     | 0.1569152     | 2  | 0.97   | 0.85          | 1.11          | 0.83   | 0.69          | 1.01            |
| STAGE3   | 23   | 0.390 0.388 | 1336 1703 550/601 769 241    | 3589 1611 | 0.12     | 0.9426322     | 2  | 1.00   | 0.88          | 1.14          | 0.97   | 0.81          | 1.17            |
| NHS2     | 9    | 0.384 0.369 | 446 528 178/134 171 43       | 1152 348  | 2.37     | 0.3061949     | 2  | 1.08   | 0.83          | 1.40          | 0.80   | 0.55          | 1.18            |
| PBCS2    | 7    | 0.399 0.398 | 621 858 268/263 330 118      | 1747 711  | 1.56     | 0.4579435     | 2  | 0.91   | 0.75          | 1.10          | 1.04   | 0.80          | 1.35            |
| WHS      | 19   | 0.380 0.388 | 269 317 104/204 268 80       | 690 552   | 0.84     | 0.6556871     | 2  | 1.11   | 0.87          | 1.42          | 1.01   | 0.72          | 1.43            |
| PBCS 1+2 | 9    | 0.402 0.390 | 795 1103 352/403 489 170     | 2250 1062 | 2.75     | 0.252409      | 2  | 0.87   | 0.75          | 1.03          | 0.95   | 0.77          | 1.19            |

**unadj\_trend**

Locus Alleles Chr Location Neighborhood  
rs11249433 T|C 1p11.2 120982136 LOC647121

| SUBSET   | Rank | MAF         | Geno Counts                   | Subjects  | score X2 | score p-value | df | het OR | het OR 95% CI | het OR 95% CI | hom OR | hom OR 95% CI | hom OR 95% CI_u |
|----------|------|-------------|-------------------------------|-----------|----------|---------------|----|--------|---------------|---------------|--------|---------------|-----------------|
| STAGE1-3 | 1    | 0.395 0.439 | 3394 4265 1474 1655 2556 1017 | 9133 5228 | 52.42    | 4.48E-13      | 1  | 1.20   | 1.14          | 1.25          | 1.43   | 1.30          | 1.57            |
| NHS      | 1    | 0.388 0.448 | 425 540 170 238 411 155       | 1135 804  | 14.48    | 0.0001413     | 1  | 1.29   | 1.13          | 1.47          | 1.66   | 1.28          | 2.16            |
| STAGE1-2 | 1    | 0.401 0.441 | 2022 2614 919 1124 1831 695   | 5555 3650 | 29.55    | 5.456E-08     | 1  | 1.18   | 1.11          | 1.25          | 1.39   | 1.24          | 1.57            |
| STAGE2   | 2    | 0.404 0.439 | 1597 2074 749 886 1420 540    | 4420 2846 | 17.38    | 0.00003066    | 1  | 1.15   | 1.08          | 1.23          | 1.33   | 1.16          | 1.52            |
| CPSII    | 9    | 0.378 0.405 | 220 235 88 108 159 48         | 543 315   | 1.12     | 0.2888977     | 1  | 1.11   | 0.91          | 1.36          | 1.24   | 0.83          | 1.84            |
| PBCS1    | 16   | 0.387 0.407 | 195 230 81 124 171 58         | 506 353   | 0.62     | 0.429446      | 1  | 1.08   | 0.89          | 1.31          | 1.17   | 0.79          | 1.72            |
| PLCO     | 17   | 0.420 0.427 | 324 476 169 140 232 75        | 969 447   | 0.14     | 0.7123007     | 1  | 1.03   | 0.88          | 1.21          | 1.06   | 0.77          | 1.47            |
| WHI      | 1    | 0.407 0.455 | 858 1133 411 514 858 359      | 2402 1731 | 18.87    | 0.00001401    | 1  | 1.21   | 1.11          | 1.33          | 1.48   | 1.24          | 1.76            |
| STAGE3   | 1    | 0.385 0.434 | 1376 1653 555 531 725 322     | 3584 1578 | 20.48    | 0.000006028   | 1  | 1.21   | 1.12          | 1.32          | 1.47   | 1.24          | 1.74            |
| NHS2     | 3    | 0.400 0.440 | 433 545 197 114 152 73        | 1175 339  | 3.32     | 0.0684864     | 1  | 1.17   | 0.99          | 1.39          | 1.37   | 0.98          | 1.92            |
| PBCS2    | 1    | 0.362 0.410 | 719 778 240 246 324 121       | 1737 691  | 9.19     | 0.0024372     | 1  | 1.21   | 1.07          | 1.38          | 1.48   | 1.15          | 1.90            |
| WHS      | 1    | 0.421 0.461 | 224 330 118 171 249 128       | 672 548   | 3.72     | 0.0539066     | 1  | 1.17   | 1.00          | 1.37          | 1.36   | 0.99          | 1.87            |
| PBCS 1+2 | 1    | 0.368 0.409 | 910 1006 321 370 495 179      | 2237 1044 | 9.46     | 0.0021052     | 1  | 1.18   | 1.06          | 1.31          | 1.39   | 1.13          | 1.71            |

Locus Alleles Chr Location Neighborhood  
rs7716600 C|A 5p12 44910762

| SUBSET   | Rank | MAF         | Geno Counts                 | Subjects  | score X2 | score p-value | df | het OR | het OR 95% CI | het OR 95% CI | hom OR | hom OR 95% CI | hom OR 95% CI_u |
|----------|------|-------------|-----------------------------|-----------|----------|---------------|----|--------|---------------|---------------|--------|---------------|-----------------|
| STAGE1-3 | 2    | 0.220 0.243 | 5595 3136 452 3042 1901 333 | 9183 5276 | 20.40    | 0.000006292   | 1  | 1.14   | 1.08          | 1.20          | 1.30   | 1.16          | 1.45            |
| NHS      | 5    | 0.215 0.253 | 693 401 44 451 303 53       | 1138 807  | 8.06     | 0.0045204     | 1  | 1.25   | 1.07          | 1.45          | 1.55   | 1.15          | 2.11            |
| STAGE1-2 | 2    | 0.216 0.249 | 3402 1923 241 2095 1316 253 | 5566 3664 | 26.42    | 2.741E-07     | 1  | 1.20   | 1.12          | 1.29          | 1.44   | 1.25          | 1.65            |
| STAGE2   | 1    | 0.216 0.247 | 2709 1522 197 1644 1013 200 | 4428 2857 | 18.62    | 0.000016      | 1  | 1.19   | 1.10          | 1.28          | 1.41   | 1.21          | 1.65            |
| CPSII    | 13   | 0.225 0.241 | 325 192 26 186 108 22       | 543 316   | 0.56     | 0.4559924     | 1  | 1.09   | 0.87          | 1.37          | 1.19   | 0.75          | 1.89            |
| PBCS1    | 1    | 0.217 0.272 | 308 173 23 186 139 26       | 504 351   | 6.83     | 0.0089707     | 1  | 1.35   | 1.08          | 1.69          | 1.82   | 1.16          | 2.85            |
| PLCO     | 15   | 0.223 0.232 | 577 359 37 261 166 21       | 973 448   | 0.35     | 5.56E-01      | 1  | 1.06   | 0.87          | 1.29          | 1.12   | 0.76          | 1.66            |
| WHI      | 3    | 0.212 0.247 | 1499 798 111 1011 600 131   | 2408 1742 | 14.08    | 0.0001755     | 1  | 1.21   | 1.10          | 1.34          | 1.48   | 1.20          | 1.81            |
| STAGE3   | 19   | 0.226 0.231 | 2193 1215 211 948 587 79    | 3619 1614 | 0.27     | 0.605873      | 1  | 1.03   | 0.93          | 1.13          | 1.05   | 0.87          | 1.28            |
| NHS2     | 20   | 0.227 0.232 | 712 397 69 205 131 16       | 1178 352  | 0.06     | 0.8066848     | 1  | 1.03   | 0.84          | 1.25          | 1.05   | 0.71          | 1.56            |
| PBCS2    | 12   | 0.223 0.233 | 1070 586 98 417 254 38      | 1754 709  | 0.54     | 0.4615955     | 1  | 1.06   | 0.91          | 1.22          | 1.11   | 0.83          | 1.49            |
| WHS      | 19   | 0.233 0.228 | 411 232 44 326 202 25       | 687 553   | 0.09     | 0.768264      | 1  | 0.97   | 0.81          | 1.17          | 0.95   | 0.65          | 1.37            |
| PBCS 1+2 | 3    | 0.221 0.246 | 1378 757 121 602 391 65     | 2256 1058 | 4.92     | 0.0265729     | 1  | 1.15   | 1.02          | 1.29          | 1.31   | 1.03          | 1.67            |

Locus Alleles Chr Location Neighborhood  
rs999737 C|T 14q24.1 68104435 RAD51L1

| SUBSET   | Rank | MAF         | Geno Counts                 | Subjects  | score X2 | score p-value | df | het OR | het OR 95% CI | het OR 95% CI | hom OR | hom OR 95% CI | hom OR 95% CI_u |
|----------|------|-------------|-----------------------------|-----------|----------|---------------|----|--------|---------------|---------------|--------|---------------|-----------------|
| STAGE1-3 | 3    | 0.237 0.216 | 5374 3222 563 3232 1803 234 | 9159 5269 | 17.81    | 0.00002436    | 1  | 0.88   | 0.84          | 0.94          | 0.78   | 0.70          | 0.88            |
| NHS      | 7    | 0.244 0.209 | 660 405 76 499 278 30       | 1141 807  | 6.36     | 0.0116624     | 1  | 0.82   | 0.71          | 0.96          | 0.68   | 0.50          | 0.92            |
| STAGE1-2 | 7    | 0.238 0.211 | 3263 1971 341 2274 1237 156 | 5575 3667 | 17.78    | 0.00002477    | 1  | 0.86   | 0.80          | 0.92          | 0.74   | 0.64          | 0.85            |
| STAGE2   | 7    | 0.236 0.212 | 2603 1566 265 1775 959 126  | 4434 2860 | 11.89    | 0.0005631     | 1  | 0.87   | 0.80          | 0.94          | 0.76   | 0.64          | 0.89            |
| CPSII    | 17   | 0.235 0.223 | 319 193 31 193 105 18       | 543 316   | 0.30     | 0.5826615     | 1  | 0.94   | 0.74          | 1.18          | 0.88   | 0.55          | 1.40            |
| PBCS1    | 5    | 0.242 0.203 | 291 185 30 219 125 9        | 506 353   | 3.84     | 0.0499562     | 1  | 0.79   | 0.62          | 1.00          | 0.62   | 0.39          | 1.00            |
| PLCO     | 14   | 0.238 0.225 | 576 334 65 262 170 16       | 975 448   | 0.53     | 0.467044      | 1  | 0.93   | 0.77          | 1.12          | 0.87   | 0.60          | 1.27            |
| WHI      | 6    | 0.235 0.208 | 1417 854 139 1101 559 83    | 2410 1743 | 8.26     | 0.0040637     | 1  | 0.86   | 0.77          | 0.95          | 0.74   | 0.60          | 0.91            |
| STAGE3   | 6    | 0.237 0.225 | 2112 1254 222 959 567 78    | 3588 1604 | 1.54     | 0.2147218     | 1  | 0.94   | 0.85          | 1.04          | 0.88   | 0.73          | 1.07            |
| NHS2     | 22   | 0.232 0.234 | 698 374 81 205 120 21       | 1153 346  | 0.01     | 0.9301442     | 1  | 1.01   | 0.83          | 1.22          | 1.02   | 0.69          | 1.50            |
| PBCS2    | 9    | 0.236 0.224 | 1016 637 94 422 248 34      | 1747 704  | 0.78     | 0.3783388     | 1  | 0.94   | 0.81          | 1.09          | 0.88   | 0.65          | 1.18            |
| WHS      | 5    | 0.245 0.221 | 398 243 47 332 199 23       | 688 554   | 1.92     | 0.1657267     | 1  | 0.88   | 0.73          | 1.06          | 0.77   | 0.53          | 1.12            |
| PBCS 1+2 | 5    | 0.237 0.217 | 1306 819 124 640 372 43     | 2249 1055 | 3.34     | 0.0677121     | 1  | 0.89   | 0.79          | 1.01          | 0.79   | 0.62          | 1.02            |

Locus Alleles Chr Location Neighborhood  
rs9491859 C|A 6q22.33 128106056 C6orf190

| SUBSET   | Rank | MAF         | Geno Counts                  | Subjects  | score X2 | score p-value | df | het OR | het OR 95% l | het OR 95% f | hom OR | hom OR 95% | hom OR 95% CI_u |
|----------|------|-------------|------------------------------|-----------|----------|---------------|----|--------|--------------|--------------|--------|------------|-----------------|
| STAGE1-3 | 4    | 0.352 0.376 | 3857 4174 1135/2089 2392 784 | 9166 5265 | 17.26    | 0.00003258    | 1  | 1.11   | 1.06         | 1.17         | 1.23   | 1.12       | 1.36            |
| NHS      | 14   | 0.356 0.375 | 459 551 130/325 359 123      | 1140 807  | 1.51     | 0.2189036     | 1  | 1.09   | 0.95         | 1.24         | 1.28   | 0.91       | 1.54            |
| STAGE1-2 | 8    | 0.348 0.376 | 2351 2568 655/1462 1649 555  | 5574 3666 | 15.40    | 0.00008692    | 1  | 1.13   | 1.06         | 1.20         | 1.28   | 1.13       | 1.44            |
| STAGE2   | 6    | 0.346 0.377 | 1892 2017 525/1137 1290 432  | 4434 2859 | 14.21    | 0.0001635     | 1  | 1.14   | 1.07         | 1.22         | 1.30   | 1.14       | 1.49            |
| CPSII    | 23   | 0.350 0.351 | 220 266 57/137 136 43        | 543 316   | 0.00     | 0.9539863     | 1  | 1.01   | 0.82         | 1.24         | 1.01   | 0.67       | 1.54            |
| PBCS1    | 15   | 0.345 0.364 | 216 231 59/147 154 51        | 506 352   | 0.63     | 0.4272264     | 1  | 1.08   | 0.89         | 1.32         | 1.18   | 0.79       | 1.75            |
| PLCO     | 4    | 0.333 0.376 | 437 427 111/170 219 59       | 975 448   | 5.10     | 0.0239932     | 1  | 1.21   | 1.03         | 1.43         | 1.46   | 1.05       | 2.04            |
| WHI      | 5    | 0.350 0.384 | 1019 1093 298/683 781 279    | 2410 1743 | 9.66     | 0.0018816     | 1  | 1.15   | 1.05         | 1.26         | 1.33   | 1.11       | 1.59            |
| STAGE3   | 4    | 0.357 0.375 | 1507 1610 480/628 743 229    | 3597 1600 | 3.06     | 0.0800038     | 1  | 1.08   | 0.99         | 1.18         | 1.16   | 0.98       | 1.38            |
| NHS2     | 24   | 0.367 0.366 | 482 523 170/147 152 53       | 1175 352  | 0.00     | 0.9715338     | 1  | 1.00   | 0.84         | 1.18         | 0.99   | 0.71       | 1.40            |
| PBCS2    | 6    | 0.349 0.365 | 744 779 218/286 322 96       | 1741 704  | 1.12     | 0.289266      | 1  | 1.07   | 0.94         | 1.22         | 1.15   | 0.89       | 1.48            |
| WHS      | 2    | 0.361 0.394 | 281 308 92/195 269 80        | 681 544   | 2.83     | 0.0925126     | 1  | 1.15   | 0.98         | 1.36         | 1.33   | 0.95       | 1.85            |
| PBCS 1+2 | 9    | 0.348 0.365 | 959 1006 277/432 476 147     | 2242 1055 | 1.79     | 0.1808264     | 1  | 1.08   | 0.97         | 1.20         | 1.16   | 0.93       | 1.43            |

Locus Alleles Chr Location Neighborhood  
rs10850145 C|T 12q24.13 112428512

| SUBSET   | Rank | MAF         | Geno Counts               | Subjects  | score X2 | score p-value | df | het OR | het OR 95% l | het OR 95% f | hom OR | hom OR 95% | hom OR 95% CI_u |
|----------|------|-------------|---------------------------|-----------|----------|---------------|----|--------|--------------|--------------|--------|------------|-----------------|
| STAGE1-3 | 5    | 0.094 0.109 | 7550 1579 79/4185 1048 54 | 9208 5287 | 16.98    | 0.00003773    | 1  | 1.18   | 1.09         | 1.28         | 1.39   | 1.19       | 1.63            |
| NHS      | 8    | 0.085 0.108 | 951 185 5/642 155 10      | 1141 807  | 5.90     | 0.0151729     | 1  | 1.31   | 1.05         | 1.62         | 1.71   | 1.11       | 2.64            |
| STAGE1-2 | 3    | 0.090 0.111 | 4627 896 52/2898 724 43   | 5575 3665 | 21.53    | 0.000003487   | 1  | 1.26   | 1.14         | 1.39         | 1.59   | 1.30       | 1.93            |
| STAGE2   | 3    | 0.091 0.111 | 3676 711 47/2256 569 33   | 4434 2858 | 15.90    | 0.00006671    | 1  | 1.25   | 1.12         | 1.39         | 1.56   | 1.25       | 1.94            |
| CPSII    | 15   | 0.099 0.111 | 444 90 9/250 62 4         | 543 316   | 0.53     | 0.4684868     | 1  | 1.12   | 0.82         | 1.53         | 1.26   | 0.68       | 2.34            |
| PBCS1    | 6    | 0.094 0.123 | 417 83 6/270 79 4         | 506 353   | 3.77     | 0.0522662     | 1  | 1.36   | 1.00         | 1.85         | 1.84   | 0.99       | 3.41            |
| PLCO     | 2    | 0.077 0.106 | 832 135 8/357 87 4        | 975 448   | 6.28     | 0.0122199     | 1  | 1.41   | 1.08         | 1.84         | 1.98   | 1.16       | 3.40            |
| WHI      | 8    | 0.094 0.110 | 1983 403 24/1379 341 21   | 2410 1741 | 5.99     | 0.0144177     | 1  | 1.20   | 1.04         | 1.38         | 1.43   | 1.07       | 1.90            |
| STAGE3   | 10   | 0.102 0.107 | 2923 684 27/1289 324 11   | 3634 1624 | 0.63     | 0.4285819     | 1  | 1.06   | 0.92         | 1.21         | 1.12   | 0.85       | 1.47            |
| NHS2     | 21   | 0.103 0.100 | 947 218 12/290 59 6       | 1177 355  | 0.05     | 0.8300104     | 1  | 0.97   | 0.74         | 1.28         | 0.94   | 0.54       | 1.64            |
| PBCS2    | 18   | 0.104 0.107 | 1412 338 15/565 143 5     | 1765 713  | 0.10     | 0.7479        | 1  | 1.03   | 0.84         | 1.27         | 1.07   | 0.71       | 1.60            |
| WHS      | 4    | 0.092 0.110 | 564 128 0/434 122 0       | 692 556   | 2.28     | 0.1306736     | 1  | 1.24   | 0.94         | 1.64         | 1.53   | 0.88       | 2.67            |
| PBCS 1+2 | 8    | 0.102 0.113 | 1829 420 21/833 222 9     | 2270 1064 | 1.91     | 0.1669422     | 1  | 1.13   | 0.95         | 1.33         | 1.27   | 0.91       | 1.77            |

Locus Alleles Chr Location Neighborhood  
rs2303659 G|A 11q24.3 129326474 PRDM10

| SUBSET   | Rank | MAF         | Geno Counts            | Subjects  | score X2 | score p-value | df | het OR | het OR 95% l | het OR 95% f | hom OR | hom OR 95% | hom OR 95% CI_u |
|----------|------|-------------|------------------------|-----------|----------|---------------|----|--------|--------------|--------------|--------|------------|-----------------|
| STAGE1-3 | 6    | 0.034 0.026 | 8545 608 10/4997 257 9 | 9163 5263 | 14.46    | 0.0001432     | 1  | 0.76   | 0.66         | 0.87         | 0.57   | 0.43       | 0.77            |
| NHS      | 13   | 0.034 0.026 | 1063 78 0/765 42 0     | 1141 807  | 2.18     | 0.1400941     | 1  | 0.75   | 0.51         | 1.10         | 0.56   | 0.26       | 1.21            |
| STAGE1-2 | 9    | 0.034 0.025 | 5197 376 2/3487 178 2  | 5575 3667 | 13.10    | 0.0002953     | 1  | 0.72   | 0.60         | 0.86         | 0.51   | 0.36       | 0.74            |
| STAGE2   | 9    | 0.034 0.024 | 4134 298 2/2722 136 2  | 4434 2860 | 11.00    | 0.0009117     | 1  | 0.71   | 0.58         | 0.87         | 0.50   | 0.33       | 0.76            |
| CPSII    | 5    | 0.030 0.019 | 510 33 0/305 10 1      | 543 316   | 2.00     | 0.1575233     | 1  | 0.62   | 0.32         | 1.21         | 0.39   | 0.10       | 1.46            |
| PBCS1    | 10   | 0.033 0.024 | 473 33 0/336 17 0      | 506 353   | 1.10     | 0.2934315     | 1  | 0.73   | 0.40         | 1.32         | 0.53   | 0.16       | 1.75            |
| PLCO     | 6    | 0.036 0.026 | 906 68 1/425 23 0      | 975 448   | 2.06     | 0.151667      | 1  | 0.70   | 0.44         | 1.14         | 0.50   | 0.19       | 1.30            |
| WHI      | 9    | 0.034 0.025 | 2245 164 1/1656 86 1   | 2410 1743 | 5.86     | 0.0154858     | 1  | 0.72   | 0.55         | 0.94         | 0.52   | 0.31       | 0.89            |
| STAGE3   | 5    | 0.035 0.029 | 3348 232 8/1511 79 7   | 3588 1597 | 1.95     | 0.1628323     | 1  | 0.85   | 0.67         | 1.07         | 0.71   | 0.45       | 1.15            |
| NHS2     | 8    | 0.040 0.030 | 1074 82 5/334 15 3     | 1161 352  | 1.30     | 0.2542228     | 1  | 0.77   | 0.48         | 1.21         | 0.59   | 0.23       | 1.47            |
| PBCS2    | 11   | 0.032 0.028 | 1648 112 1/669 40 0    | 1761 709  | 0.59     | 0.4423651     | 1  | 0.87   | 0.60         | 1.25         | 0.75   | 0.36       | 1.57            |
| WHS      | 22   | 0.032 0.030 | 626 38 2/508 24 4      | 666 536   | 0.05     | 0.8238842     | 1  | 0.95   | 0.61         | 1.48         | 0.91   | 0.38       | 2.18            |
| PBCS 1+2 | 11   | 0.032 0.027 | 2121 145 1/1004 57 0   | 2267 1061 | 1.54     | 0.2150271     | 1  | 0.82   | 0.60         | 1.12         | 0.67   | 0.36       | 1.26            |

Locus Alleles Chr Location Neighborhood  
rs12608723 A|G 19q13.11 38508973

| SUBSET   | Rank | MAF         | Geno Counts                | Subjects  | score X2 | score p-value | df | het OR | het OR 95% CI | het OR 95% CI | hom OR | hom OR 95% CI | hom OR 95% CI_u |
|----------|------|-------------|----------------------------|-----------|----------|---------------|----|--------|---------------|---------------|--------|---------------|-----------------|
| STAGE1-3 | 7    | 0.137 0.121 | 6878 2122 195/4075 1120 78 | 9195 5273 | 14.13    | 0.000171      | 1  | 0.87   | 0.81          | 0.94          | 0.76   | 0.66          | 0.88            |
| NHS      | 4    | 0.153 0.121 | 818 296 27/624 169 13      | 1141 806  | 8.18     | 0.0042425     | 1  | 0.76   | 0.63          | 0.92          | 0.58   | 0.40          | 0.84            |
| STAGE1-2 | 6    | 0.143 0.121 | 4102 1351 122/2831 783 52  | 5575 3666 | 18.41    | 0.0000178     | 1  | 0.83   | 0.76          | 0.90          | 0.68   | 0.57          | 0.81            |
| STAGE2   | 8    | 0.140 0.121 | 3284 1055 95/2207 614 39   | 4434 2860 | 11.31    | 0.0007718     | 1  | 0.84   | 0.76          | 0.93          | 0.71   | 0.58          | 0.87            |
| CPSII    | 3    | 0.140 0.114 | 398 138 7/250 60 6         | 543 316   | 2.43     | 0.1191072     | 1  | 0.79   | 0.58          | 1.06          | 0.62   | 0.34          | 1.13            |
| PBCS1    | 2    | 0.153 0.110 | 364 129 13/278 72 3        | 506 353   | 6.45     | 0.0110986     | 1  | 0.69   | 0.51          | 0.92          | 0.47   | 0.26          | 0.84            |
| PLCO     | 8    | 0.132 0.116 | 738 216 21/348 96 4        | 975 448   | 1.44     | 0.2301799     | 1  | 0.86   | 0.68          | 1.10          | 0.74   | 0.46          | 1.21            |
| WHI      | 13   | 0.141 0.126 | 1784 572 54/1331 386 26    | 2410 1743 | 4.10     | 0.0429778     | 1  | 0.88   | 0.77          | 1.00          | 0.77   | 0.59          | 0.99            |
| STAGE3   | 12   | 0.127 0.122 | 2778 774 73/1244 340 26    | 3625 1610 | 0.53     | 0.4684188     | 1  | 0.96   | 0.84          | 1.08          | 0.91   | 0.71          | 1.17            |
| NHS2     | 13   | 0.127 0.117 | 907 259 21/272 72 5        | 1187 349  | 0.42     | 0.5153392     | 1  | 0.92   | 0.71          | 1.19          | 0.84   | 0.50          | 1.41            |
| PBCS2    | 16   | 0.124 0.119 | 1344 368 32/554 145 12     | 1744 711  | 0.23     | 0.6319464     | 1  | 0.96   | 0.79          | 1.15          | 0.91   | 0.63          | 1.33            |
| WHS      | 15   | 0.135 0.128 | 527 147 20/418 123 9       | 694 550   | 0.22     | 0.6403204     | 1  | 0.95   | 0.75          | 1.19          | 0.90   | 0.57          | 1.42            |
| PBCS 1+2 | 7    | 0.130 0.115 | 1706 494 45/832 214 15     | 2245 1061 | 2.93     | 0.0871716     | 1  | 0.87   | 0.74          | 1.02          | 0.76   | 0.55          | 1.04            |

Locus Alleles Chr Location Neighborhood  
rs4415084 C|T 5p12 44698272

| SUBSET   | Rank | MAF         | Geno Counts                  | Subjects  | score X2 | score p-value | df | het OR | het OR 95% CI | het OR 95% CI | hom OR | hom OR 95% CI | hom OR 95% CI_u |
|----------|------|-------------|------------------------------|-----------|----------|---------------|----|--------|---------------|---------------|--------|---------------|-----------------|
| STAGE1-3 | 8    | 0.408 0.430 | 3249 4351 1557/1736 2512 998 | 9157 5246 | 13.10    | 0.000295      | 1  | 1.09   | 1.04          | 1.15          | 1.19   | 1.09          | 1.32            |
| NHS      | 6    | 0.392 0.437 | 429 513 185/240 421 139      | 1127 800  | 7.89     | 0.0049803     | 1  | 1.21   | 1.06          | 1.37          | 1.45   | 1.12          | 1.89            |
| STAGE1-2 | 13   | 0.403 0.428 | 1986 2660 913/1209 1769 681  | 5559 3659 | 10.70    | 0.00107       | 1  | 1.10   | 1.04          | 1.17          | 1.22   | 1.08          | 1.37            |
| STAGE2   | 14   | 0.406 0.425 | 1557 2147 728/969 1348 542   | 4432 2859 | 5.03     | 0.0249129     | 1  | 1.08   | 1.01          | 1.15          | 1.17   | 1.02          | 1.33            |
| CPSII    | 4    | 0.427 0.389 | 178 265 99/121 144 51        | 542 316   | 2.32     | 0.1274399     | 1  | 0.86   | 0.70          | 1.05          | 0.73   | 0.49          | 1.09            |
| PBCS1    | 3    | 0.410 0.463 | 174 249 83/97 185 71         | 506 353   | 4.92     | 0.0264926     | 1  | 1.25   | 1.03          | 1.52          | 1.56   | 1.05          | 2.32            |
| PLCO     | 22   | 0.408 0.407 | 339 475 160/163 205 80       | 974 448   | 0.00     | 0.9701984     | 1  | 1.00   | 0.85          | 1.17          | 0.99   | 0.72          | 1.37            |
| WHI      | 7    | 0.400 0.429 | 866 1158 386/588 814 340     | 2410 1742 | 6.60     | 0.0101942     | 1  | 1.12   | 1.03          | 1.22          | 1.26   | 1.06          | 1.50            |
| STAGE3   | 3    | 0.414 0.434 | 1263 1694 645/528 747 319    | 3602 1594 | 3.58     | 0.0584136     | 1  | 1.08   | 1.00          | 1.18          | 1.17   | 0.99          | 1.38            |
| NHS2     | 2    | 0.399 0.447 | 436 540 199/111 161 74       | 1175 346  | 4.74     | 0.029509      | 1  | 1.20   | 1.02          | 1.42          | 1.45   | 1.04          | 2.03            |
| PBCS2    | 7    | 0.424 0.440 | 593 833 328/226 346 140      | 1754 712  | 0.93     | 0.3357342     | 1  | 1.06   | 0.94          | 1.20          | 1.13   | 0.88          | 1.44            |
| WHS      | 20   | 0.414 0.420 | 234 321 118/191 240 105      | 673 536   | 0.08     | 0.7727819     | 1  | 1.02   | 0.87          | 1.20          | 1.05   | 0.76          | 1.44            |
| PBCS 1+2 | 4    | 0.421 0.447 | 767 1079 410/322 527 209     | 2256 1058 | 3.85     | 0.0498101     | 1  | 1.11   | 1.00          | 1.23          | 1.23   | 1.00          | 1.51            |

Locus Alleles Chr Location Neighborhood  
rs12622050 G|A 2q11.2 100945886 NPAS2

| SUBSET   | Rank | MAF         | Geno Counts                 | Subjects  | score X2 | score p-value | df | het OR | het OR 95% CI | het OR 95% CI | hom OR | hom OR 95% CI | hom OR 95% CI_u |
|----------|------|-------------|-----------------------------|-----------|----------|---------------|----|--------|---------------|---------------|--------|---------------|-----------------|
| STAGE1-3 | 9    | 0.225 0.208 | 5470 3225 447/3307 1695 246 | 9142 5248 | 11.14    | 0.0008452     | 1  | 0.91   | 0.85          | 0.96          | 0.82   | 0.73          | 0.92            |
| NHS      | 10   | 0.220 0.189 | 694 392 55/529 251 27       | 1141 807  | 5.56     | 0.0183416     | 1  | 0.83   | 0.70          | 0.97          | 0.68   | 0.49          | 0.94            |
| STAGE1-2 | 12   | 0.220 0.200 | 3355 1980 239/2361 1141 162 | 5574 3664 | 11.30    | 0.0007753     | 1  | 0.88   | 0.82          | 0.95          | 0.78   | 0.67          | 0.90            |
| STAGE2   | 13   | 0.221 0.203 | 2661 1588 184/1832 890 135  | 4433 2857 | 6.48     | 0.0108806     | 1  | 0.90   | 0.83          | 0.98          | 0.81   | 0.69          | 0.95            |
| CPSII    | 21   | 0.217 0.213 | 323 203 16/201 94 20        | 542 315   | 0.04     | 0.8404707     | 1  | 0.98   | 0.77          | 1.24          | 0.95   | 0.59          | 1.55            |
| PBCS1    | 21   | 0.244 0.249 | 284 197 25/204 121 27       | 506 352   | 0.05     | 0.8311342     | 1  | 1.02   | 0.82          | 1.28          | 1.05   | 0.67          | 1.64            |
| PLCO     | 5    | 0.229 0.195 | 577 350 48/288 145 15       | 975 448   | 4.10     | 0.0429811     | 1  | 0.82   | 0.67          | 0.99          | 0.66   | 0.45          | 0.99            |
| WHI      | 10   | 0.213 0.194 | 1477 838 95/1139 530 73     | 2410 1742 | 4.64     | 0.0312227     | 1  | 0.89   | 0.80          | 0.99          | 0.79   | 0.63          | 0.98            |
| STAGE3   | 15   | 0.233 0.227 | 2116 1247 208/947 555 83    | 3571 1585 | 0.35     | 0.5514942     | 1  | 0.97   | 0.88          | 1.07          | 0.94   | 0.77          | 1.15            |
| NHS2     | 14   | 0.205 0.215 | 734 358 56/210 117 15       | 1148 342  | 0.33     | 0.568591      | 1  | 1.06   | 0.86          | 1.30          | 1.13   | 0.75          | 1.70            |
| PBCS2    | 15   | 0.252 0.245 | 980 644 117/402 254 45      | 1741 701  | 0.24     | 0.623588      | 1  | 0.97   | 0.84          | 1.11          | 0.93   | 0.70          | 1.24            |
| WHS      | 8    | 0.231 0.212 | 402 245 35/335 184 23       | 682 542   | 1.24     | 0.2646866     | 1  | 0.90   | 0.74          | 1.09          | 0.80   | 0.54          | 1.18            |
| PBCS 1+2 | 18   | 0.250 0.247 | 1263 839 142/605 374 73     | 2244 1052 | 0.07     | 0.7896258     | 1  | 0.98   | 0.87          | 1.11          | 0.97   | 0.76          | 1.23            |

Locus Alleles Chr Location Neighborhood  
rs3134615 G|T 1p34.2 40134653 TRIT1,MYCL1

| SUBSET   | Rank | MAF         | Geno Counts                 | Subjects  | score X2 | score p-value | df | het OR | het OR 95% l | het OR 95% u | hom OR | hom OR 95% l | hom OR 95% u | hom OR 95% CI_u |
|----------|------|-------------|-----------------------------|-----------|----------|---------------|----|--------|--------------|--------------|--------|--------------|--------------|-----------------|
| STAGE1-3 | 10   | 0.226 0.243 | 5514 3211 475/3003 1970 297 | 9200 5270 | 11.05    | 0.0008848     | 1  | 1.10   | 1.04         | 1.16         | 1.21   | 1.08         | 1.36         |                 |
| NHS      | 3    | 0.220 0.262 | 689 402 50/433 325 49       | 1141 807  | 9.55     | 0.0020029     | 1  | 1.27   | 1.09         | 1.48         | 1.61   | 1.19         | 2.18         |                 |
| STAGE1-2 | 14   | 0.227 0.247 | 3314 1996 265/2072 1377 218 | 5575 3667 | 10.68    | 0.0010839     | 1  | 1.12   | 1.05         | 1.20         | 1.26   | 1.10         | 1.45         |                 |
| STAGE2   | 17   | 0.228 0.243 | 2625 1594 215/1639 1052 169 | 4434 2860 | 4.28     | 0.038502      | 1  | 1.09   | 1.00         | 1.18         | 1.18   | 1.01         | 1.38         |                 |
| CPSII    | 18   | 0.215 0.222 | 326 200 17/193 106 17       | 543 316   | 0.09     | 0.7642126     | 1  | 1.04   | 0.81         | 1.32         | 1.08   | 0.66         | 1.75         |                 |
| PBCS1    | 20   | 0.226 0.231 | 299 185 22/213 117 23       | 506 353   | 0.05     | 0.82352       | 1  | 1.03   | 0.82         | 1.29         | 1.05   | 0.67         | 1.66         |                 |
| PLCO     | 10   | 0.236 0.253 | 578 334 63/247 175 26       | 975 448   | 1.00     | 0.3178801     | 1  | 1.10   | 0.91         | 1.31         | 1.20   | 0.84         | 1.73         |                 |
| WHI      | 14   | 0.228 0.247 | 1422 875 113/986 654 103    | 2410 1743 | 3.83     | 0.050453      | 1  | 1.11   | 1.00         | 1.23         | 1.23   | 1.00         | 1.51         |                 |
| STAGE3   | 7    | 0.226 0.235 | 2200 1215 210/931 595 80    | 3625 1606 | 1.13     | 0.2881527     | 1  | 1.05   | 0.96         | 1.16         | 1.11   | 0.91         | 1.35         |                 |
| NHS2     | 9    | 0.225 0.244 | 724 388 73/196 131 19       | 1185 346  | 1.04     | 0.3081224     | 1  | 1.11   | 0.91         | 1.34         | 1.22   | 0.83         | 1.81         |                 |
| PBCS2    | 22   | 0.226 0.225 | 1063 591 102/427 240 39     | 1756 706  | 0.01     | 0.9314094     | 1  | 0.99   | 0.86         | 1.15         | 0.99   | 0.74         | 1.32         |                 |
| WHS      | 10   | 0.224 0.242 | 413 236 35/308 224 22       | 684 554   | 1.19     | 0.275486      | 1  | 1.11   | 0.92         | 1.35         | 1.24   | 0.84         | 1.82         |                 |
| PBCS 1+2 | 23   | 0.226 0.226 | 1362 776 124/640 355 61     | 2262 1056 | 0.00     | 0.9645731     | 1  | 1.00   | 0.88         | 1.13         | 0.99   | 0.78         | 1.27         |                 |

Locus rs17570439 Alleles T|C Chr 1p34.2 Location Neighborhood 40096797 TRIT1

| SUBSET   | Rank | MAF         | Geno Counts                 | Subjects  | score X2 | score p-value | df | het OR | het OR 95% l | het OR 95% u | hom OR | hom OR 95% l | hom OR 95% u | hom OR 95% CI_u |
|----------|------|-------------|-----------------------------|-----------|----------|---------------|----|--------|--------------|--------------|--------|--------------|--------------|-----------------|
| STAGE1-3 | 11   | 0.208 0.224 | 5732 3020 388/3177 1825 269 | 9140 5271 | 10.83    | 0.0009997     | 1  | 1.10   | 1.04         | 1.17         | 1.22   | 1.08         | 1.37         |                 |
| NHS      | 2    | 0.204 0.245 | 718 381 42/457 304 46       | 1141 807  | 9.70     | 0.0018402     | 1  | 1.28   | 1.09         | 1.49         | 1.63   | 1.20         | 2.23         |                 |
| STAGE1-2 | 11   | 0.207 0.228 | 3472 1895 208/2196 1270 201 | 5575 3667 | 11.38    | 0.0007439     | 1  | 1.13   | 1.05         | 1.22         | 1.28   | 1.11         | 1.48         |                 |
| STAGE2   | 16   | 0.208 0.223 | 2754 1514 166/1739 966 155  | 4434 2860 | 4.65     | 0.0311143     | 1  | 1.09   | 1.01         | 1.19         | 1.20   | 1.02         | 1.41         |                 |
| CPSII    | 20   | 0.196 0.201 | 343 187 13/203 99 14        | 543 316   | 0.06     | 0.8043235     | 1  | 1.03   | 0.80         | 1.33         | 1.07   | 0.64         | 1.76         |                 |
| PBCS1    | 19   | 0.210 0.215 | 310 179 17/223 108 22       | 506 353   | 0.06     | 0.8101222     | 1  | 1.03   | 0.81         | 1.30         | 1.06   | 0.66         | 1.69         |                 |
| PLCO     | 9    | 0.220 0.238 | 599 323 53/259 165 24       | 975 448   | 1.08     | 0.2978363     | 1  | 1.10   | 0.92         | 1.33         | 1.22   | 0.84         | 1.77         |                 |
| WHI      | 12   | 0.206 0.225 | 1502 825 83/1054 594 95     | 2410 1743 | 4.56     | 0.0327345     | 1  | 1.12   | 1.01         | 1.25         | 1.26   | 1.02         | 1.56         |                 |
| STAGE3   | 9    | 0.208 0.215 | 2260 1126 180/981 555 68    | 3566 1604 | 0.65     | 0.4215234     | 1  | 1.04   | 0.94         | 1.15         | 1.09   | 0.89         | 1.33         |                 |
| NHS2     | 5    | 0.206 0.232 | 730 346 61/201 125 17       | 1137 343  | 2.03     | 0.1538024     | 1  | 1.16   | 0.95         | 1.41         | 1.34   | 0.90         | 1.99         |                 |
| PBCS2    | 20   | 0.208 0.210 | 1111 557 86/448 228 35      | 1754 711  | 0.02     | 0.8925952     | 1  | 1.01   | 0.87         | 1.17         | 1.02   | 0.76         | 1.38         |                 |
| WHS      | 24   | 0.214 0.213 | 419 223 33/332 202 16       | 675 550   | 0.01     | 0.9344107     | 1  | 0.99   | 0.81         | 1.21         | 0.98   | 0.66         | 1.46         |                 |
| PBCS 1+2 | 17   | 0.208 0.211 | 1421 735 103/671 336 57     | 2259 1064 | 0.09     | 0.768573      | 1  | 1.02   | 0.90         | 1.15         | 1.04   | 0.81         | 1.33         |                 |

Locus rs2067980 Alleles A|G Chr 5p12 Location Neighborhood 45018074

| SUBSET   | Rank | MAF         | Geno Counts                 | Subjects  | score X2 | score p-value | df | het OR | het OR 95% l | het OR 95% u | hom OR | hom OR 95% l | hom OR 95% u | hom OR 95% CI_u |
|----------|------|-------------|-----------------------------|-----------|----------|---------------|----|--------|--------------|--------------|--------|--------------|--------------|-----------------|
| STAGE1-3 | 12   | 0.161 0.176 | 6467 2446 251/3610 1460 197 | 9164 5267 | 10.81    | 0.001007      | 1  | 1.11   | 1.04         | 1.18         | 1.24   | 1.09         | 1.40         |                 |
| NHS      | 9    | 0.151 0.179 | 814 310 17/542 240 24       | 1141 806  | 5.63     | 0.0176218     | 1  | 1.24   | 1.04         | 1.47         | 1.53   | 1.08         | 2.17         |                 |
| STAGE1-2 | 4    | 0.151 0.176 | 4007 1454 114/2510 1021 135 | 5575 3666 | 20.69    | 0.000005405   | 1  | 1.20   | 1.11         | 1.30         | 1.44   | 1.23         | 1.69         |                 |
| STAGE2   | 5    | 0.151 0.175 | 3193 1144 97/1968 781 111   | 4434 2860 | 15.14    | 0.00009962    | 1  | 1.19   | 1.09         | 1.30         | 1.42   | 1.19         | 1.70         |                 |
| CPSII    | 16   | 0.159 0.171 | 383 147 13/221 82 13        | 543 316   | 0.38     | 0.5364481     | 1  | 1.09   | 0.84         | 1.41         | 1.18   | 0.70         | 1.98         |                 |
| PBCS1    | 4    | 0.191 0.231 | 335 149 22/208 127 18       | 506 353   | 4.00     | 0.045607      | 1  | 1.27   | 1.00         | 1.60         | 1.61   | 1.01         | 2.56         |                 |
| PLCO     | 12   | 0.144 0.156 | 714 241 20/322 112 14       | 975 448   | 0.71     | 0.4003006     | 1  | 1.10   | 0.88         | 1.37         | 1.21   | 0.78         | 1.87         |                 |
| WHI      | 4    | 0.143 0.170 | 1761 607 42/1217 460 66     | 2410 1743 | 10.67    | 0.001089      | 1  | 1.22   | 1.08         | 1.37         | 1.49   | 1.17         | 1.88         |                 |
| STAGE3   | 24   | 0.176 0.176 | 2460 993 137/1100 440 62    | 3590 1602 | 0.00     | 0.9584289     | 1  | 1.00   | 0.90         | 1.11         | 0.99   | 0.80         | 1.23         |                 |
| NHS2     | 17   | 0.170 0.162 | 810 306 44/249 82 15        | 1160 346  | 0.23     | 0.6352016     | 1  | 0.95   | 0.76         | 1.18         | 0.90   | 0.58         | 1.40         |                 |
| PBCS2    | 19   | 0.190 0.188 | 1158 519 73/467 211 27      | 1750 705  | 0.03     | 0.869858      | 1  | 0.99   | 0.84         | 1.15         | 0.97   | 0.71         | 1.33         |                 |
| WHS      | 9    | 0.153 0.170 | 492 168 20/384 147 20       | 680 551   | 1.21     | 0.2718373     | 1  | 1.13   | 0.91         | 1.39         | 1.27   | 0.83         | 1.93         |                 |
| PBCS 1+2 | 13   | 0.190 0.202 | 1493 667 95/675 337 45      | 2255 1057 | 1.28     | 0.2578876     | 1  | 1.08   | 0.95         | 1.22         | 1.16   | 0.90         | 1.50         |                 |

Locus rs1274466 Alleles T|C Chr 10p11.21 Location Neighborhood 34510210 PARD3

| SUBSET   | Rank | MAF         | Geno Counts                   | Subjects  | score X2 | score p-value | df | het OR | het OR 95% l | het OR 95% t | hom OR | hom OR 95% | hom OR 95% CI_u |
|----------|------|-------------|-------------------------------|-----------|----------|---------------|----|--------|--------------|--------------|--------|------------|-----------------|
| STAGE1-3 | 13   | 0.452 0.433 | 2783 4512 1894 1706 2563 1004 | 9189 5273 | 8.89     | 0.0028605     | 1  | 0.93   | 0.89         | 0.98         | 0.86   | 0.78       | 0.95            |
| NHS      | 12   | 0.470 0.436 | 312 585 244 261 388 158       | 1141 807  | 4.44     | 0.0351079     | 1  | 0.87   | 0.77         | 0.99         | 0.76   | 0.59       | 0.98            |
| STAGE1-2 | 10   | 0.456 0.429 | 1656 2756 1163 1213 1761 692  | 5575 3666 | 12.77    | 0.0003521     | 1  | 0.90   | 0.85         | 0.95         | 0.81   | 0.72       | 0.91            |
| STAGE2   | 11   | 0.452 0.427 | 1344 2171 919 952 1373 534    | 4434 2859 | 8.80     | 0.003008      | 1  | 0.90   | 0.85         | 0.97         | 0.82   | 0.72       | 0.93            |
| CPSII    | 8    | 0.471 0.440 | 152 271 120 101 152 63        | 543 316   | 1.50     | 0.2207503     | 1  | 0.88   | 0.73         | 1.08         | 0.78   | 0.53       | 1.16            |
| PBCS1    | 11   | 0.483 0.457 | 138 247 121 104 174 74        | 506 352   | 1.09     | 0.2958245     | 1  | 0.90   | 0.75         | 1.09         | 0.82   | 0.56       | 1.20            |
| PLCO     | 1    | 0.449 0.391 | 298 478 199 167 212 69        | 975 448   | 8.50     | 0.0035451     | 1  | 0.79   | 0.67         | 0.93         | 0.62   | 0.45       | 0.86            |
| WHI      | 18   | 0.443 0.428 | 756 1175 479 580 835 328      | 2410 1743 | 1.78     | 0.1823911     | 1  | 0.94   | 0.86         | 1.03         | 0.89   | 0.75       | 1.06            |
| STAGE3   | 22   | 0.445 0.444 | 1127 1760 732 493 802 313     | 3619 1608 | 0.02     | 0.8948696     | 1  | 0.99   | 0.92         | 1.08         | 0.99   | 0.84       | 1.17            |
| NHS2     | 16   | 0.441 0.429 | 379 559 240 114 168 65        | 1178 347  | 0.28     | 0.5939024     | 1  | 0.96   | 0.81         | 1.13         | 0.91   | 0.65       | 1.28            |
| PBCS2    | 17   | 0.457 0.451 | 518 863 368 211 357 141       | 1749 709  | 0.17     | 0.6790912     | 1  | 0.97   | 0.86         | 1.10         | 0.95   | 0.74       | 1.22            |
| WHS      | 11   | 0.423 0.445 | 230 338 124 168 277 107       | 692 552   | 1.15     | 0.2842459     | 1  | 1.09   | 0.93         | 1.28         | 1.19   | 0.86       | 1.64            |
| PBCS 1+2 | 16   | 0.463 0.452 | 656 1106 488 315 531 214      | 2250 1060 | 0.61     | 0.4333068     | 1  | 0.96   | 0.87         | 1.06         | 0.92   | 0.75       | 1.13            |

Locus rs37936 Alleles Chr Location Neighborhood  
A|G 7q21.11 79806994

| SUBSET   | Rank | MAF         | Geno Counts                  | Subjects  | score X2 | score p-value | df | het OR | het OR 95% l | het OR 95% t | hom OR | hom OR 95% | hom OR 95% CI_u |
|----------|------|-------------|------------------------------|-----------|----------|---------------|----|--------|--------------|--------------|--------|------------|-----------------|
| STAGE1-3 | 14   | 0.384 0.367 | 3487 4138 1398 2078 2378 707 | 9023 5163 | 7.90     | 0.0049425     | 1  | 0.93   | 0.89         | 0.98         | 0.87   | 0.79       | 0.96            |
| NHS      | 11   | 0.399 0.362 | 403 541 177 333 343 115      | 1121 791  | 5.25     | 0.0219571     | 1  | 0.86   | 0.75         | 0.98         | 0.74   | 0.57       | 0.96            |
| STAGE1-2 | 5    | 0.398 0.363 | 1839 2287 832 1325 1468 438  | 4958 3231 | 20.45    | 0.000006122   | 1  | 0.86   | 0.81         | 0.92         | 0.75   | 0.66       | 0.85            |
| STAGE2   | 4    | 0.398 0.363 | 1436 1746 655 992 1125 323   | 3837 2440 | 15.21    | 0.00009616    | 1  | 0.86   | 0.80         | 0.93         | 0.75   | 0.65       | 0.87            |
| CPSII    | 7    | 0.387 0.355 | 199 251 79 131 139 41        | 529 311   | 1.62     | 0.2032153     | 1  | 0.88   | 0.71         | 1.07         | 0.77   | 0.51       | 1.15            |
| PLCO     | 18   | 0.378 0.372 | 379 431 146 181 186 69       | 956 436   | 0.10     | 0.7463246     | 1  | 0.97   | 0.83         | 1.14         | 0.95   | 0.69       | 1.31            |
| WHI      | 2    | 0.409 0.362 | 858 1064 430 680 800 213     | 2352 1693 | 17.69    | 0.00002595    | 1  | 0.82   | 0.75         | 0.90         | 0.68   | 0.57       | 0.81            |
| STAGE3   | 14   | 0.368 0.374 | 1455 1636 504 624 763 219    | 3595 1606 | 0.36     | 0.548545      | 1  | 1.03   | 0.94         | 1.12         | 1.05   | 0.89       | 1.25            |
| NHS2     | 6    | 0.371 0.399 | 475 529 171 128 174 56       | 1175 358  | 1.89     | 0.1689713     | 1  | 1.13   | 0.95         | 1.33         | 1.27   | 0.90       | 1.78            |
| PBCS2    | 14   | 0.368 0.360 | 706 782 248 283 324 88       | 1736 695  | 0.29     | 0.587365      | 1  | 0.97   | 0.85         | 1.10         | 0.93   | 0.72       | 1.20            |
| WHS      | 13   | 0.362 0.375 | 274 325 85 213 265 75        | 684 553   | 0.48     | 0.4868453     | 1  | 1.06   | 0.90         | 1.25         | 1.13   | 0.81       | 1.57            |
| PBCS 1+2 | 22   | 0.367 0.366 | 899 997 310 412 471 138      | 2206 1021 | 0.00     | 0.9581997     | 1  | 1.00   | 0.90         | 1.11         | 0.99   | 0.80       | 1.23            |

Locus rs10941679 Alleles Chr Location Neighborhood  
A|G 5p12 44742255

| SUBSET   | Rank | MAF         | Geno Counts               | Subjects  | score X2 | score p-value | df | het OR | het OR 95% l | het OR 95% t | hom OR | hom OR 95% | hom OR 95% CI_u |
|----------|------|-------------|---------------------------|-----------|----------|---------------|----|--------|--------------|--------------|--------|------------|-----------------|
| STAGE1-3 | 15   | 0.259 0.282 | 2233 1539 281 991 791 148 | 4053 1930 | 6.70     | 0.009654      | 1  | 1.12   | 1.03         | 1.22         | 1.25   | 1.06       | 1.49            |
| STAGE3   | 2    | 0.259 0.277 | 1977 1345 254 830 650 118 | 3576 1598 | 3.70     | 0.054514      | 1  | 1.10   | 1.00         | 1.20         | 1.20   | 1.00       | 1.45            |
| NHS2     | 4    | 0.255 0.283 | 637 430 76 181 137 30     | 1143 348  | 2.21     | 0.1375113     | 1  | 1.15   | 0.96         | 1.39         | 1.33   | 0.91       | 1.94            |
| PBCS2    | 2    | 0.259 0.288 | 969 667 121 350 308 50    | 1757 708  | 4.52     | 0.033519      | 1  | 1.16   | 1.01         | 1.33         | 1.35   | 1.02       | 1.78            |
| WHS      | 16   | 0.268 0.259 | 371 248 57 299 205 38     | 676 542   | 0.22     | 0.6422004     | 1  | 0.96   | 0.80         | 1.15         | 0.92   | 0.64       | 1.31            |
| PBCS 1+2 | 2    | 0.259 0.293 | 1225 861 148 511 449 80   | 2234 1040 | 8.38     | 0.0037903     | 1  | 1.19   | 1.06         | 1.34         | 1.41   | 1.12       | 1.78            |

Locus rs724244 Alleles Chr Location Neighborhood  
C|T 3p24.1 27217157 NEK10

| SUBSET   | Rank | MAF         | Geno Counts                 | Subjects  | score X2 | score p-value | df | het OR | het OR 95% l | het OR 95% t | hom OR | hom OR 95% | hom OR 95% CI_u |
|----------|------|-------------|-----------------------------|-----------|----------|---------------|----|--------|--------------|--------------|--------|------------|-----------------|
| STAGE1-3 | 16   | 0.260 0.274 | 4413 3055 562 2365 1767 340 | 8030 4472 | 5.23     | 0.0222241     | 1  | 1.07   | 1.01         | 1.13         | 1.15   | 1.02       | 1.29            |
| STAGE1-2 | 15   | 0.252 0.275 | 2473 1688 272 1508 1131 220 | 4433 2859 | 9.56     | 0.0019843     | 1  | 1.13   | 1.04         | 1.21         | 1.27   | 1.09       | 1.48            |
| STAGE2   | 10   | 0.252 0.275 | 2473 1688 272 1508 1131 220 | 4433 2859 | 9.56     | 0.0019843     | 1  | 1.13   | 1.04         | 1.21         | 1.27   | 1.09       | 1.48            |
| CPSII    | 10   | 0.247 0.266 | 309 198 35 173 118 25       | 542 316   | 0.71     | 0.4001278     | 1  | 1.10   | 0.88         | 1.37         | 1.21   | 0.78       | 1.88            |
| PBCS1    | 14   | 0.246 0.265 | 293 177 36 198 123 32       | 506 353   | 0.72     | 0.3954966     | 1  | 1.10   | 0.89         | 1.36         | 1.20   | 0.79       | 1.84            |
| PLCO     | 3    | 0.230 0.271 | 569 364 42 235 182 30       | 975 447   | 5.86     | 0.0155227     | 1  | 1.26   | 1.04         | 1.52         | 1.58   | 1.09       | 2.30            |
| WHI      | 16   | 0.263 0.279 | 1302 949 159 902 708 133    | 2410 1743 | 2.85     | 0.0916561     | 1  | 1.09   | 0.99         | 1.20         | 1.18   | 0.97       | 1.44            |



|          |    |             |                           |           |      |           |   |      |      |      |      |      |      |
|----------|----|-------------|---------------------------|-----------|------|-----------|---|------|------|------|------|------|------|
| STAGE3   | 23 | 0.271 0.272 | 1940 1371 290 857 636 120 | 3601 1613 | 0.00 | 0.9459473 | 1 | 1.00 | 0.91 | 1.10 | 1.01 | 0.84 | 1.21 |
| NHS2     | 11 | 0.270 0.286 | 638 417 105 179 142 29    | 1160 350  | 0.60 | 0.4369798 | 1 | 1.07 | 0.90 | 1.29 | 1.15 | 0.80 | 1.66 |
| PBCS2    | 13 | 0.273 0.265 | 926 696 131 381 280 48    | 1753 709  | 0.34 | 0.562617  | 1 | 0.96 | 0.83 | 1.10 | 1.10 | 0.70 | 1.22 |
| WHS      | 21 | 0.266 0.271 | 376 258 54 297 214 43     | 688 554   | 0.07 | 0.7928345 | 1 | 1.02 | 0.86 | 1.22 | 1.05 | 0.74 | 1.49 |
| PBCS 1+2 | 21 | 0.267 0.265 | 1219 869 167 579 403 80   | 2255 1062 | 0.02 | 0.8865477 | 1 | 0.99 | 0.88 | 1.11 | 0.98 | 0.78 | 1.24 |

Locus Alleles Chr Location Neighborhood  
rs3817198 T|C 11p15.5 1865582 LSP1

| SUBSET   | Rank | MAF         | Geno Counts                 | Subjects  | score X2 | score p-value | df | het OR | het OR 95% CI | het OR 95% CI | hom OR | hom OR 95% CI | hom OR 95% CI_u |
|----------|------|-------------|-----------------------------|-----------|----------|---------------|----|--------|---------------|---------------|--------|---------------|-----------------|
| STAGE1-3 | 17   | 0.325 0.335 | 4170 4041 961 2368 2287 625 | 9172 5280 | 2.94     | 0.086372      | 1  | 1.05   | 0.99          | 1.10          | 1.09   | 0.99          | 1.21            |
| NHS      | 16   | 0.318 0.328 | 524 509 108 373 339 95      | 1141 807  | 0.44     | 0.5088003     | 1  | 1.05   | 0.91          | 1.20          | 1.10   | 0.83          | 1.44            |
| STAGE1-2 | 20   | 0.326 0.337 | 2533 2437 597 1631 1595 436 | 5567 3662 | 2.27     | 0.1322215     | 1  | 1.05   | 0.99          | 1.12          | 1.10   | 0.97          | 1.25            |
| STAGE2   | 21   | 0.328 0.339 | 2009 1928 489 1258 1256 341 | 4426 2855 | 1.90     | 0.1676558     | 1  | 1.05   | 0.98          | 1.13          | 1.10   | 0.96          | 1.27            |
| CPSII    | 19   | 0.334 0.340 | 243 231 64 139 138 38       | 538 315   | 0.06     | 0.8017223     | 1  | 1.03   | 0.84          | 1.26          | 1.05   | 0.70          | 1.59            |
| PBCS1    | 18   | 0.319 0.326 | 229 228 47 161 150 39       | 504 350   | 0.08     | 0.7836048     | 1  | 1.03   | 0.84          | 1.27          | 1.06   | 0.70          | 1.61            |
| PLCO     | 23   | 0.335 0.334 | 440 417 118 190 215 42      | 975 447   | 0.00     | 0.9824426     | 1  | 1.00   | 0.84          | 1.18          | 1.00   | 0.71          | 1.39            |
| WHI      | 17   | 0.326 0.343 | 1097 1052 260 768 753 222   | 2409 1743 | 2.60     | 0.1066846     | 1  | 1.08   | 0.98          | 1.18          | 1.16   | 0.97          | 1.40            |
| STAGE3   | 11   | 0.324 0.331 | 1636 1605 364 734 693 189   | 3605 1616 | 0.62     | 0.4317195     | 1  | 1.04   | 0.95          | 1.13          | 1.07   | 0.90          | 1.28            |
| NHS2     | 15   | 0.320 0.331 | 538 516 117 162 155 41      | 1171 358  | 0.29     | 0.588996      | 1  | 1.05   | 0.88          | 1.26          | 1.10   | 0.77          | 1.58            |
| PBCS2    | 24   | 0.330 0.330 | 789 789 189 326 301 84      | 1767 711  | 0.00     | 0.9782579     | 1  | 1.00   | 0.88          | 1.14          | 1.00   | 0.77          | 1.29            |
| WHS      | 7    | 0.312 0.334 | 309 300 58 246 237 64       | 667 547   | 1.33     | 0.2494284     | 1  | 1.11   | 0.93          | 1.31          | 1.22   | 0.87          | 1.73            |
| PBCS 1+2 | 24   | 0.328 0.327 | 1019 1016 236 490 450 123   | 2271 1063 | 0.00     | 0.9848994     | 1  | 1.00   | 0.90          | 1.11          | 1.00   | 0.80          | 1.24            |

Locus Alleles Chr Location Neighborhood  
rs7936636 C|T 11p11.2 44397546

| SUBSET   | Rank | MAF         | Geno Counts                 | Subjects  | score X2 | score p-value | df | het OR | het OR 95% CI | het OR 95% CI | hom OR | hom OR 95% CI | hom OR 95% CI_u |
|----------|------|-------------|-----------------------------|-----------|----------|---------------|----|--------|---------------|---------------|--------|---------------|-----------------|
| STAGE1-3 | 18   | 0.258 0.249 | 5016 3564 583 2989 1934 347 | 9163 5270 | 2.72     | 0.0993546     | 1  | 0.95   | 0.90          | 1.01          | 0.91   | 0.82          | 1.02            |
| NHS      | 17   | 0.256 0.247 | 634 430 77 470 276 61       | 1141 807  | 0.42     | 0.5171174     | 1  | 0.95   | 0.83          | 1.10          | 0.91   | 0.68          | 1.21            |
| STAGE1-2 | 16   | 0.263 0.245 | 3002 2205 365 2117 1303 246 | 5572 3666 | 7.97     | 0.0047633     | 1  | 0.91   | 0.85          | 0.97          | 0.82   | 0.72          | 0.94            |
| STAGE2   | 12   | 0.265 0.244 | 2368 1775 288 1647 1027 185 | 4431 2859 | 8.06     | 0.0045356     | 1  | 0.89   | 0.83          | 0.97          | 0.80   | 0.69          | 0.93            |
| CPSII    | 2    | 0.266 0.222 | 286 224 32 197 98 21        | 542 316   | 4.17     | 0.0411658     | 1  | 0.79   | 0.62          | 0.99          | 0.62   | 0.39          | 0.98            |
| PBCS1    | 13   | 0.247 0.229 | 284 193 28 212 119 21       | 505 352   | 0.73     | 0.3942524     | 1  | 0.91   | 0.72          | 1.14          | 0.82   | 0.52          | 1.29            |
| PLCO     | 16   | 0.263 0.253 | 526 385 64 254 161 33       | 975 448   | 0.30     | 0.5831814     | 1  | 0.95   | 0.79          | 1.14          | 0.90   | 0.63          | 1.30            |
| WHI      | 11   | 0.270 0.249 | 1272 973 164 984 649 110    | 2409 1743 | 4.56     | 0.0326495     | 1  | 0.90   | 0.81          | 0.99          | 0.80   | 0.66          | 0.98            |
| STAGE3   | 8    | 0.250 0.259 | 2014 1359 218 872 631 100   | 3591 1603 | 1.02     | 0.3117723     | 1  | 1.05   | 0.95          | 1.16          | 1.10   | 0.91          | 1.34            |
| NHS2     | 7    | 0.264 0.241 | 630 457 79 204 123 23       | 1166 350  | 1.39     | 0.2379543     | 1  | 0.89   | 0.73          | 1.08          | 0.79   | 0.53          | 1.17            |
| PBCS2    | 3    | 0.245 0.268 | 993 643 105 372 282 47      | 1741 701  | 2.88     | 0.0898639     | 1  | 1.13   | 0.98          | 1.30          | 1.28   | 0.96          | 1.70            |
| WHS      | 6    | 0.239 0.259 | 391 259 34 296 226 30       | 684 552   | 1.39     | 0.2391446     | 1  | 1.12   | 0.93          | 1.35          | 1.25   | 0.86          | 1.83            |
| PBCS 1+2 | 14   | 0.245 0.256 | 1277 836 133 584 401 69     | 2246 1054 | 0.83     | 0.362801      | 1  | 1.06   | 0.94          | 1.19          | 1.12   | 0.88          | 1.42            |

Locus Alleles Chr Location Neighborhood  
rs998592 G|A 16p13.13 11107179 CLEC16A

| SUBSET   | Rank | MAF         | Geno Counts                  | Subjects  | score X2 | score p-value | df | het OR | het OR 95% CI | het OR 95% CI | hom OR | hom OR 95% CI | hom OR 95% CI_u |
|----------|------|-------------|------------------------------|-----------|----------|---------------|----|--------|---------------|---------------|--------|---------------|-----------------|
| STAGE1-3 | 19   | 0.426 0.418 | 3060 4399 1711 1751 2638 885 | 9170 5274 | 2.00     | 0.1573997     | 1  | 0.97   | 0.92          | 1.01          | 0.93   | 0.85          | 1.03            |
| NHS      | 20   | 0.424 0.429 | 405 502 232 253 415 139      | 1139 807  | 0.11     | 0.7457448     | 1  | 1.02   | 0.90          | 1.16          | 1.04   | 0.81          | 1.34            |
| STAGE1-2 | 17   | 0.438 0.425 | 1803 2653 1117 1181 1857 629 | 5573 3667 | 3.37     | 0.0663544     | 1  | 0.95   | 0.89          | 1.00          | 0.89   | 0.79          | 1.01            |
| STAGE2   | 15   | 0.442 0.423 | 1398 2151 885 928 1442 490   | 4434 2860 | 4.97     | 0.0257585     | 1  | 0.93   | 0.87          | 0.99          | 0.86   | 0.75          | 0.98            |
| CPSII    | 1    | 0.475 0.416 | 158 254 131 107 155 54       | 543 316   | 5.40     | 0.0201541     | 1  | 0.79   | 0.65          | 0.97          | 0.63   | 0.43          | 0.93            |
| PBCS1    | 7    | 0.415 0.368 | 186 220 100 141 164 48       | 506 353   | 3.57     | 0.0589304     | 1  | 0.83   | 0.69          | 1.01          | 0.69   | 0.47          | 1.01            |
| PLCO     | 7    | 0.419 0.393 | 324 485 166 162 220 66       | 975 448   | 1.77     | 0.1831671     | 1  | 0.89   | 0.76          | 1.05          | 0.80   | 0.58          | 1.11            |
| WHI      | 22   | 0.450 0.444 | 730 1192 488 518 903 322     | 2410 1743 | 0.30     | 0.5823692     | 1  | 0.98   | 0.89          | 1.07          | 0.95   | 0.80          | 1.14            |

|          |    |             |                           |           |      |           |   |      |      |      |      |      |      |
|----------|----|-------------|---------------------------|-----------|------|-----------|---|------|------|------|------|------|------|
| STAGE3   | 16 | 0.408 0.402 | 1257 1746 595/570 782 256 | 3598 1608 | 0.30 | 0.5869208 | 1 | 0.98 | 0.90 | 1.06 | 0.95 | 0.80 | 1.13 |
| NHS2     | 19 | 0.418 0.423 | 394 568 202/119 167 65    | 1164 351  | 0.07 | 0.7941989 | 1 | 1.02 | 0.86 | 1.21 | 1.05 | 0.74 | 1.47 |
| PBCS2    | 8  | 0.400 0.386 | 625 849 274/266 333 105   | 1748 704  | 0.82 | 0.3642666 | 1 | 0.94 | 0.83 | 1.07 | 0.89 | 0.69 | 1.15 |
| WHS      | 23 | 0.413 0.410 | 238 329 119/185 282 86    | 686 553   | 0.02 | 0.8879658 | 1 | 0.99 | 0.84 | 1.16 | 0.98 | 0.71 | 1.35 |
| PBCS 1+2 | 6  | 0.403 0.380 | 811 1069 373/407 496 153  | 2253 1056 | 3.16 | 0.0752466 | 1 | 0.91 | 0.82 | 1.01 | 0.83 | 0.67 | 1.02 |

Locus Alleles Chr Location Neighborhood  
rs4666451 G|A 2p24.1 19150424

| SUBSET   | Rank | MAF         | Geno Counts                  | Subjects  | score X2 | score p-value | df | het OR | het OR 95% ( | het OR 95% ( | hom OR | hom OR 95% | hom OR 95% CI_u |
|----------|------|-------------|------------------------------|-----------|----------|---------------|----|--------|--------------|--------------|--------|------------|-----------------|
| STAGE1-3 | 20   | 0.394 0.386 | 2956 3804 1260/1679 2133 657 | 8020 4469 | 1.78     | 0.1818942     | 1  | 0.96   | 0.91         | 1.02         | 0.93   | 0.84       | 1.03            |
| STAGE1-2 | 19   | 0.397 0.384 | 1622 2102 710/1078 1366 416  | 4434 2860 | 2.42     | 0.1199157     | 1  | 0.95   | 0.89         | 1.01         | 0.90   | 0.78       | 1.03            |
| STAGE2   | 19   | 0.397 0.384 | 1622 2102 710/1078 1366 416  | 4434 2860 | 2.42     | 0.1199157     | 1  | 0.95   | 0.89         | 1.01         | 0.90   | 0.78       | 1.03            |
| CPSII    | 11   | 0.394 0.413 | 201 256 86/96 179 41         | 543 316   | 0.63     | 0.4288491     | 1  | 1.09   | 0.88         | 1.33         | 1.18   | 0.78       | 1.78            |
| PBCS1    | 9    | 0.409 0.375 | 176 246 84/140 161 52        | 506 353   | 1.96     | 0.161204      | 1  | 0.87   | 0.71         | 1.06         | 0.76   | 0.51       | 1.12            |
| PLCO     | 21   | 0.393 0.394 | 355 474 146/170 203 75       | 975 448   | 0.00     | 0.9534424     | 1  | 1.00   | 0.85         | 1.18         | 1.01   | 0.73       | 1.40            |
| WHI      | 15   | 0.397 0.378 | 890 1126 394/672 823 248     | 2410 1743 | 2.95     | 0.0861251     | 1  | 0.93   | 0.85         | 1.01         | 0.86   | 0.72       | 1.02            |
| STAGE3   | 21   | 0.390 0.388 | 1336 1703 550/601 769 241    | 3589 1611 | 0.05     | 0.829296      | 1  | 0.99   | 0.91         | 1.08         | 0.98   | 0.83       | 1.16            |
| NHS2     | 12   | 0.384 0.369 | 446 528 178/134 171 43       | 1152 348  | 0.47     | 0.4944631     | 1  | 0.94   | 0.79         | 1.12         | 0.89   | 0.62       | 1.26            |
| PBCS2    | 23   | 0.399 0.398 | 621 858 268/263 330 118      | 1747 711  | 0.00     | 0.9512034     | 1  | 1.00   | 0.88         | 1.13         | 0.99   | 0.77       | 1.28            |
| WHS      | 18   | 0.380 0.388 | 269 317 104/204 268 80       | 690 552   | 0.14     | 0.7126443     | 1  | 1.03   | 0.88         | 1.21         | 1.06   | 0.77       | 1.47            |
| PBCS 1+2 | 15   | 0.402 0.390 | 795 1103 352/403 489 170     | 2250 1062 | 0.77     | 0.3817        | 1  | 0.95   | 0.86         | 1.06         | 0.91   | 0.74       | 1.12            |

Locus Alleles Chr Location Neighborhood  
rs7121523 G|A 11p15.4 7556781 PPFIBP2

| SUBSET   | Rank | MAF         | Geno Counts                 | Subjects  | score X2 | score p-value | df | het OR | het OR 95% ( | het OR 95% ( | hom OR | hom OR 95% | hom OR 95% CI_u |
|----------|------|-------------|-----------------------------|-----------|----------|---------------|----|--------|--------------|--------------|--------|------------|-----------------|
| STAGE1-3 | 21   | 0.156 0.161 | 6502 2482 193/3746 1354 170 | 9177 5270 | 1.00     | 0.3171798     | 1  | 1.03   | 0.97         | 1.10         | 1.07   | 0.94       | 1.22            |
| NHS      | 15   | 0.159 0.168 | 807 306 28/572 199 36       | 1141 807  | 0.57     | 0.4501256     | 1  | 1.07   | 0.90         | 1.26         | 1.14   | 0.81       | 1.59            |
| STAGE1-2 | 22   | 0.156 0.161 | 3940 1525 106/2613 923 129  | 5571 3665 | 0.90     | 0.3419467     | 1  | 1.04   | 0.96         | 1.13         | 1.08   | 0.92       | 1.27            |
| STAGE2   | 22   | 0.155 0.159 | 3133 1219 78/2041 724 93    | 4430 2858 | 0.43     | 0.5138043     | 1  | 1.03   | 0.94         | 1.13         | 1.06   | 0.88       | 1.28            |
| CPSII    | 22   | 0.173 0.171 | 368 161 13/220 84 12        | 542 316   | 0.01     | 0.9314004     | 1  | 0.99   | 0.76         | 1.28         | 0.98   | 0.58       | 1.65            |
| PBCS1    | 12   | 0.138 0.156 | 373 123 8/259 76 17         | 504 352   | 1.06     | 0.3043568     | 1  | 1.15   | 0.88         | 1.49         | 1.32   | 0.78       | 2.23            |
| PLCO     | 19   | 0.156 0.160 | 688 270 17/318 117 13       | 975 448   | 0.07     | 0.7983435     | 1  | 1.03   | 0.83         | 1.28         | 1.06   | 0.68       | 1.64            |
| WHI      | 23   | 0.155 0.158 | 1704 665 40/1244 447 51     | 2409 1742 | 0.14     | 0.7121903     | 1  | 1.02   | 0.91         | 1.15         | 1.05   | 0.82       | 1.33            |
| STAGE3   | 20   | 0.157 0.160 | 2562 957 86/1133 431 41     | 3605 1605 | 0.17     | 0.6760375     | 1  | 1.02   | 0.91         | 1.15         | 1.05   | 0.84       | 1.32            |
| NHS2     | 10   | 0.167 0.153 | 811 332 30/254 88 10        | 1173 352  | 0.74     | 0.3886111     | 1  | 0.90   | 0.72         | 1.14         | 0.82   | 0.51       | 1.30            |
| PBCS2    | 10   | 0.148 0.158 | 1266 440 38/496 184 18      | 1744 698  | 0.73     | 0.3944307     | 1  | 1.08   | 0.91         | 1.28         | 1.16   | 0.82       | 1.64            |
| WHS      | 17   | 0.161 0.167 | 485 185 18/383 159 13       | 688 555   | 0.17     | 0.6827652     | 1  | 1.05   | 0.84         | 1.30         | 1.09   | 0.71       | 1.68            |
| PBCS 1+2 | 12   | 0.146 0.157 | 1639 563 47/755 260 35      | 2249 1050 | 1.35     | 0.2444646     | 1  | 1.09   | 0.94         | 1.25         | 1.18   | 0.89       | 1.57            |

Locus Alleles Chr Location Neighborhood  
rs11077820 T|C 17q25.1 71966263 UBE2O, AANAT

| SUBSET   | Rank | MAF         | Geno Counts                  | Subjects  | score X2 | score p-value | df | het OR | het OR 95% ( | het OR 95% ( | hom OR | hom OR 95% | hom OR 95% CI_u |
|----------|------|-------------|------------------------------|-----------|----------|---------------|----|--------|--------------|--------------|--------|------------|-----------------|
| STAGE1-3 | 22   | 0.372 0.367 | 3584 4307 1250/2153 2342 760 | 9141 5255 | 0.67     | 0.4120097     | 1  | 0.98   | 0.93         | 1.03         | 0.96   | 0.87       | 1.06            |
| NHS      | 18   | 0.382 0.374 | 429 553 159/329 353 125      | 1141 807  | 0.26     | 0.610613      | 1  | 0.97   | 0.85         | 1.10         | 0.93   | 0.72       | 1.21            |
| STAGE1-2 | 18   | 0.380 0.368 | 2081 2738 749/1502 1623 538  | 5568 3663 | 2.72     | 0.0990394     | 1  | 0.95   | 0.89         | 1.01         | 0.90   | 0.80       | 1.02            |
| STAGE2   | 18   | 0.380 0.367 | 1652 2185 590/1173 1270 413  | 4427 2856 | 2.58     | 0.1084526     | 1  | 0.94   | 0.88         | 1.01         | 0.89   | 0.78       | 1.03            |
| CPSII    | 14   | 0.377 0.359 | 216 242 83/131 143 42        | 541 316   | 0.53     | 0.4671362     | 1  | 0.93   | 0.76         | 1.13         | 0.86   | 0.58       | 1.29            |
| PBCS1    | 8    | 0.375 0.334 | 193 244 67/160 150 43        | 504 353   | 2.99     | 0.0835466     | 1  | 0.84   | 0.68         | 1.02         | 0.70   | 0.47       | 1.05            |
| PLCO     | 11   | 0.371 0.354 | 371 484 120/188 200 58       | 975 446   | 0.79     | 0.3729319     | 1  | 0.93   | 0.78         | 1.10         | 0.86   | 0.61       | 1.20            |
| WHI      | 19   | 0.385 0.378 | 872 1215 320/694 777 270     | 2407 1741 | 0.44     | 0.5075644     | 1  | 0.97   | 0.89         | 1.06         | 0.94   | 0.78       | 1.13            |
| STAGE3   | 18   | 0.360 0.365 | 1503 1568 502/651 720 222    | 3573 1593 | 0.27     | 0.6032496     | 1  | 1.02   | 0.94         | 1.11         | 1.05   | 0.88       | 1.24            |

|          |    |             |                          |           |      |           |   |      |      |      |      |      |      |
|----------|----|-------------|--------------------------|-----------|------|-----------|---|------|------|------|------|------|------|
| NHS2     | 18 | 0.364 0.373 | 470 516 158 136 163 48   | 1144 347  | 0.21 | 0.6498862 | 1 | 1.04 | 0.87 | 1.24 | 1.08 | 0.77 | 1.54 |
| PBCS2    | 4  | 0.359 0.382 | 732 784 238/269 335 102  | 1754 706  | 2.16 | 0.1411999 | 1 | 1.10 | 0.97 | 1.25 | 1.21 | 0.94 | 1.56 |
| WHS      | 12 | 0.356 0.339 | 301 268 106/246 222 72   | 675 540   | 0.66 | 0.4162928 | 1 | 0.94 | 0.80 | 1.10 | 0.88 | 0.64 | 1.21 |
| PBCS 1+2 | 19 | 0.362 0.366 | 925 1029 304/429 484 145 | 2258 1058 | 0.07 | 0.7962052 | 1 | 1.01 | 0.91 | 1.13 | 1.03 | 0.83 | 1.27 |

Locus Alleles Chr Location Neighborhood  
rs2391406 T|G 13q33.3 106586873

| SUBSET   | Rank | MAF         | Geno Counts                  | Subjects  | score X2 | score p-value | df | het OR | het OR 95% CI | het OR 95% CI | hom OR | hom OR 95% CI | hom OR 95% CI_u |
|----------|------|-------------|------------------------------|-----------|----------|---------------|----|--------|---------------|---------------|--------|---------------|-----------------|
| STAGE1-3 | 23   | 0.372 0.367 | 3658 4164 1315/2088 2463 694 | 9137 5245 | 0.62     | 0.4320973     | 1  | 0.98   | 0.93          | 1.03          | 0.96   | 0.87          | 1.06            |
| NHS      | 19   | 0.371 0.366 | 452 529 159/323 377 107      | 1140 807  | 0.11     | 0.7348316     | 1  | 0.98   | 0.86          | 1.12          | 0.96   | 0.73          | 1.24            |
| STAGE1-2 | 21   | 0.374 0.363 | 2234 2499 829/1453 1759 451  | 5562 3663 | 2.06     | 0.151333      | 1  | 0.96   | 0.90          | 1.02          | 0.91   | 0.81          | 1.03            |
| STAGE2   | 20   | 0.374 0.362 | 1782 1970 670/1130 1382 344  | 4422 2856 | 2.07     | 0.149776      | 1  | 0.95   | 0.89          | 1.02          | 0.90   | 0.79          | 1.04            |
| CPSII    | 6    | 0.371 0.339 | 217 240 79/132 150 31        | 536 313   | 1.82     | 0.1770951     | 1  | 0.87   | 0.71          | 1.07          | 0.75   | 0.50          | 1.14            |
| PBCS1    | 17   | 0.387 0.375 | 195 230 81/125 190 37        | 506 352   | 0.28     | 0.597758      | 1  | 0.95   | 0.77          | 1.16          | 0.90   | 0.60          | 1.34            |
| PLCO     | 13   | 0.376 0.360 | 398 416 157/180 213 55       | 971 448   | 0.59     | 0.4408654     | 1  | 0.94   | 0.80          | 1.10          | 0.88   | 0.64          | 1.22            |
| WHI      | 20   | 0.372 0.365 | 972 1084 353/693 829 221     | 2409 1743 | 0.41     | 0.5208446     | 1  | 0.97   | 0.89          | 1.06          | 0.94   | 0.79          | 1.13            |
| STAGE3   | 13   | 0.369 0.376 | 1424 1669 486/635 705 243    | 3579 1583 | 0.48     | 0.4866185     | 1  | 1.03   | 0.95          | 1.12          | 1.06   | 0.90          | 1.26            |
| NHS2     | 1    | 0.344 0.402 | 510 503 148/129 162 60       | 1161 351  | 7.47     | 0.006271      | 1  | 1.27   | 1.07          | 1.50          | 1.61   | 1.14          | 2.26            |
| PBCS2    | 21   | 0.380 0.381 | 656 853 236/275 321 108      | 1745 704  | 0.01     | 0.9090366     | 1  | 1.01   | 0.89          | 1.15          | 1.02   | 0.79          | 1.31            |
| WHS      | 3    | 0.384 0.352 | 258 313 102/231 222 75       | 673 528   | 2.46     | 0.1166591     | 1  | 0.88   | 0.74          | 1.03          | 0.77   | 0.55          | 1.07            |
| PBCS 1+2 | 20   | 0.381 0.379 | 851 1079 317/400 510 145     | 2247 1055 | 0.03     | 0.872927      | 1  | 0.99   | 0.89          | 1.10          | 0.98   | 0.79          | 1.22            |

Locus Alleles Chr Location Neighborhood  
rs17740709 A|G 12q21.31 81947471 TMTC2

| SUBSET   | Rank | MAF         | Geno Counts                 | Subjects  | score X2 | score p-value | df | het OR | het OR 95% CI | het OR 95% CI | hom OR | hom OR 95% CI | hom OR 95% CI_u |
|----------|------|-------------|-----------------------------|-----------|----------|---------------|----|--------|---------------|---------------|--------|---------------|-----------------|
| STAGE1-3 | 24   | 0.220 0.219 | 5556 3162 430/3251 1707 300 | 9148 5258 | 0.01     | 0.9297998     | 1  | 1.00   | 0.94          | 1.06          | 0.99   | 0.89          | 1.12            |
| NHS      | 21   | 0.218 0.222 | 691 402 48/502 251 54       | 1141 807  | 0.09     | 0.7579753     | 1  | 1.02   | 0.88          | 1.19          | 1.05   | 0.77          | 1.42            |
| STAGE1-2 | 23   | 0.218 0.216 | 3371 1979 225/2293 1165 209 | 5575 3667 | 0.10     | 0.7463871     | 1  | 0.99   | 0.92          | 1.06          | 0.98   | 0.85          | 1.13            |
| STAGE2   | 23   | 0.218 0.214 | 2680 1577 177/1791 914 155  | 4434 2860 | 0.29     | 0.5885029     | 1  | 0.98   | 0.90          | 1.06          | 0.96   | 0.81          | 1.12            |
| CPSII    | 12   | 0.215 0.199 | 328 197 18/205 96 15        | 543 316   | 0.58     | 0.4481508     | 1  | 0.91   | 0.71          | 1.16          | 0.83   | 0.50          | 1.35            |
| PBCS1    | 22   | 0.242 0.245 | 282 203 21/203 127 23       | 506 353   | 0.02     | 0.8861085     | 1  | 1.02   | 0.81          | 1.28          | 1.03   | 0.65          | 1.63            |
| PLCO     | 20   | 0.214 0.218 | 603 326 46/277 147 24       | 975 448   | 0.04     | 0.844788      | 1  | 1.02   | 0.84          | 1.23          | 1.04   | 0.71          | 1.52            |
| WHI      | 21   | 0.215 0.209 | 1467 851 92/1106 544 93     | 2410 1743 | 0.34     | 0.55779       | 1  | 0.97   | 0.87          | 1.08          | 0.94   | 0.76          | 1.16            |
| STAGE3   | 17   | 0.223 0.228 | 2185 1184 205/958 544 91    | 3574 1593 | 0.29     | 0.59081       | 1  | 1.03   | 0.93          | 1.13          | 1.06   | 0.87          | 1.28            |
| NHS2     | 23   | 0.211 0.211 | 723 368 59/214 112 16       | 1150 342  | 0.00     | 0.9656662     | 1  | 1.00   | 0.81          | 1.22          | 0.99   | 0.66          | 1.50            |
| PBCS2    | 5    | 0.234 0.254 | 1042 597 112/398 260 50     | 1751 708  | 2.07     | 0.1499284     | 1  | 1.11   | 0.96          | 1.27          | 1.23   | 0.93          | 1.62            |
| WHS      | 14   | 0.213 0.204 | 420 219 34/346 172 25       | 673 543   | 0.27     | 0.6008312     | 1  | 0.95   | 0.78          | 1.15          | 0.90   | 0.61          | 1.33            |
| PBCS 1+2 | 10   | 0.236 0.251 | 1324 799 133/601 385 73     | 2256 1059 | 1.66     | 0.1976959     | 1  | 1.08   | 0.96          | 1.22          | 1.17   | 0.92          | 1.48            |

**unadj\_rec**

Locus Alleles Chr Location Neighborhood  
rs11249433 T|C 1p11.2 120982136 LOC647121

| SUBSET   | Rank | MAF         | Geno Counts                   | Subjects  | score X2 | score p-value | df | hom OR | hom OR 95% CI | hom OR 95% CI_u |
|----------|------|-------------|-------------------------------|-----------|----------|---------------|----|--------|---------------|-----------------|
| STAGE1-3 | 1    | 0.395 0.439 | 3394 4265 1474/1655 2556 1017 | 9133 5228 | 25.46    | 4.507E-07     | 1  | 1.25   | 1.15          | 1.37            |
| NHS      | 3    | 0.388 0.448 | 425 540 170/238 411 155       | 1135 804  | 6.24     | 0.0124974     | 1  | 1.36   | 1.07          | 1.72            |
| STAGE1-2 | 11   | 0.401 0.441 | 2022 2614 919/1124 1831 695   | 5555 3650 | 9.50     | 0.0020531     | 1  | 1.19   | 1.06          | 1.32            |
| STAGE2   | 14   | 0.404 0.439 | 1597 2074 749/886 1420 540    | 4420 2846 | 4.88     | 0.0271591     | 1  | 1.15   | 1.02          | 1.30            |
| CPSII    | 20   | 0.378 0.405 | 220 235 88/108 159 48         | 543 315   | 0.14     | 0.708187      | 1  | 0.93   | 0.63          | 1.36            |
| PBCS1    | 20   | 0.387 0.407 | 195 230 81/124 171 58         | 506 353   | 0.03     | 0.8685477     | 1  | 1.03   | 0.71          | 1.49            |
| PLCO     | 19   | 0.420 0.427 | 324 476 169/140 232 75        | 969 447   | 0.09     | 0.7591133     | 1  | 0.95   | 0.71          | 1.29            |
| WHI      | 6    | 0.407 0.455 | 858 1133 411/514 858 359      | 2402 1731 | 8.74     | 0.0031161     | 1  | 1.27   | 1.08          | 1.48            |

|          |   |             |                           |           |       |            |   |      |      |      |
|----------|---|-------------|---------------------------|-----------|-------|------------|---|------|------|------|
| STAGE3   | 1 | 0.385 0.434 | 1376 1653 555/531 725 322 | 3584 1578 | 18.81 | 0.00001447 | 1 | 1.40 | 1.20 | 1.63 |
| NHS2     | 2 | 0.400 0.440 | 433 545 197/114 152 73    | 1175 339  | 4.08  | 0.0433489  | 1 | 1.36 | 1.01 | 1.84 |
| PBCS2    | 1 | 0.362 0.410 | 719 778 240/246 324 121   | 1737 691  | 5.33  | 0.0209719  | 1 | 1.32 | 1.04 | 1.68 |
| WHS      | 1 | 0.421 0.461 | 224 330 118/171 249 128   | 672 548   | 6.30  | 0.0120489  | 1 | 1.43 | 1.08 | 1.89 |
| PBCS 1+2 | 2 | 0.368 0.409 | 910 1006 321/370 495 179  | 2237 1044 | 4.31  | 0.0379322  | 1 | 1.24 | 1.01 | 1.51 |

Locus Alleles Chr Location Neighborhood  
rs999737 C|T 14q24.1 68104435 RAD51L1

| SUBSET   | Rank | MAF         | Geno Counts                 | Subjects  | score X2 | score p-value | df | hom OR | hom OR 95% | hom OR 95% CI_u |
|----------|------|-------------|-----------------------------|-----------|----------|---------------|----|--------|------------|-----------------|
| STAGE1-3 | 2    | 0.237 0.216 | 5374 3222 563/3232 1803 234 | 9159 5269 | 18.65    | 0.0000157     | 1  | 0.71   | 0.61       | 0.83            |
| NHS      | 1    | 0.244 0.209 | 660 405 76/499 278 30       | 1141 807  | 7.96     | 0.0047859     | 1  | 0.54   | 0.35       | 0.83            |
| STAGE1-2 | 7    | 0.238 0.211 | 3263 1971 341/2274 1237 156 | 5575 3667 | 15.08    | 0.0001031     | 1  | 0.68   | 0.56       | 0.83            |
| STAGE2   | 9    | 0.236 0.212 | 2603 1566 265/1775 959 126  | 4434 2860 | 8.46     | 0.0036356     | 1  | 0.73   | 0.58       | 0.90            |
| CPSII    | 22   | 0.235 0.223 | 319 193 31/193 105 18       | 543 316   | 0.00     | 0.9937659     | 1  | 1.00   | 0.55       | 1.81            |
| PBCS1    | 3    | 0.242 0.203 | 291 185 30/219 125 9        | 506 353   | 5.48     | 0.0192481     | 1  | 0.42   | 0.19       | 0.89            |
| PLCO     | 1    | 0.238 0.225 | 576 334 65/262 170 16       | 975 448   | 5.48     | 1.93E-02      | 1  | 0.52   | 0.30       | 0.91            |
| WHI      | 17   | 0.235 0.208 | 1417 854 139/1101 559 83    | 2410 1743 | 2.02     | 0.1550338     | 1  | 0.82   | 0.62       | 1.08            |
| STAGE3   | 2    | 0.237 0.225 | 2112 1254 222/959 567 78    | 3588 1604 | 3.57     | 0.0587783     | 1  | 0.78   | 0.59       | 1.01            |
| NHS2     | 11   | 0.232 0.234 | 698 374 81/205 120 21       | 1153 346  | 0.38     | 0.5357981     | 1  | 0.86   | 0.52       | 1.40            |
| PBCS2    | 13   | 0.236 0.224 | 1016 637 94/422 248 34      | 1747 704  | 0.31     | 0.5789664     | 1  | 0.89   | 0.60       | 1.33            |
| WHS      | 2    | 0.245 0.221 | 398 243 47/332 199 23       | 688 554   | 4.14     | 0.0417895     | 1  | 0.59   | 0.35       | 0.99            |
| PBCS 1+2 | 3    | 0.237 0.217 | 1306 819 124/640 372 43     | 2249 1055 | 3.09     | 0.0786204     | 1  | 0.73   | 0.51       | 1.04            |

Locus Alleles Chr Location Neighborhood  
rs9491859 C|A 6q22.33 128106056 C6orf190

| SUBSET   | Rank | MAF         | Geno Counts                  | Subjects  | score X2 | score p-value | df | hom OR | hom OR 95% | hom OR 95% CI_u |
|----------|------|-------------|------------------------------|-----------|----------|---------------|----|--------|------------|-----------------|
| STAGE1-3 | 3    | 0.352 0.376 | 3857 4174 1135/2089 2392 784 | 9166 5265 | 18.25    | 0.00001942    | 1  | 1.24   | 1.12       | 1.37            |
| NHS      | 4    | 0.356 0.375 | 459 551 130/325 359 123      | 1140 807  | 6.16     | 0.0130914     | 1  | 1.40   | 1.07       | 1.82            |
| STAGE1-2 | 4    | 0.348 0.376 | 2351 2568 655/1462 1649 555  | 5574 3666 | 22.31    | 0.000002323   | 1  | 1.34   | 1.19       | 1.51            |
| STAGE2   | 5    | 0.346 0.377 | 1892 2017 525/1137 1290 432  | 4434 2859 | 16.30    | 0.000054      | 1  | 1.33   | 1.16       | 1.52            |
| CPSII    | 7    | 0.350 0.351 | 220 266 57/137 136 43        | 543 316   | 1.88     | 0.1704813     | 1  | 1.34   | 0.88       | 2.05            |
| PBCS1    | 12   | 0.345 0.364 | 216 231 59/147 154 51        | 506 352   | 1.49     | 0.2228395     | 1  | 1.28   | 0.86       | 1.92            |
| PLCO     | 11   | 0.333 0.376 | 437 427 111/170 219 59       | 975 448   | 0.93     | 0.3349217     | 1  | 1.18   | 0.84       | 1.65            |
| WHI      | 4    | 0.350 0.384 | 1019 1093 298/683 781 279    | 2410 1743 | 11.21    | 0.0008123     | 1  | 1.35   | 1.13       | 1.61            |
| STAGE3   | 11   | 0.357 0.375 | 1507 1610 480/628 743 229    | 3597 1600 | 0.88     | 0.3479666     | 1  | 1.08   | 0.92       | 1.29            |
| NHS2     | 22   | 0.367 0.366 | 482 523 170/147 152 53       | 1175 352  | 0.08     | 0.7838001     | 1  | 1.05   | 0.75       | 1.46            |
| PBCS2    | 6    | 0.349 0.365 | 744 779 218/286 322 96       | 1741 704  | 0.56     | 0.4556299     | 1  | 1.10   | 0.85       | 1.43            |
| WHS      | 16   | 0.361 0.394 | 281 308 92/195 269 80        | 681 544   | 0.36     | 0.5492745     | 1  | 1.10   | 0.80       | 1.53            |
| PBCS 1+2 | 5    | 0.348 0.365 | 959 1006 277/432 476 147     | 2242 1055 | 1.60     | 0.2065641     | 1  | 1.15   | 0.93       | 1.42            |

Locus Alleles Chr Location Neighborhood  
rs7121523 G|A 11p15.4 7556781 PPFIBP2

| SUBSET   | Rank | MAF         | Geno Counts                 | Subjects  | score X2 | score p-value | df | hom OR | hom OR 95% | hom OR 95% CI_u |
|----------|------|-------------|-----------------------------|-----------|----------|---------------|----|--------|------------|-----------------|
| STAGE1-3 | 4    | 0.156 0.161 | 6502 2482 193/3746 1354 170 | 9177 5270 | 17.23    | 0.00003317    | 1  | 1.55   | 1.26       | 1.91            |
| NHS      | 5    | 0.159 0.168 | 807 306 28/572 199 36       | 1141 807  | 5.99     | 0.0143708     | 1  | 1.86   | 1.12       | 3.07            |
| STAGE1-2 | 2    | 0.156 0.161 | 3940 1525 106/2613 923 129  | 5571 3665 | 23.31    | 0.000001377   | 1  | 1.88   | 1.45       | 2.44            |
| STAGE2   | 3    | 0.155 0.159 | 3133 1219 78/2041 724 93    | 4430 2858 | 16.91    | 0.00003925    | 1  | 1.88   | 1.38       | 2.55            |
| CPSII    | 9    | 0.173 0.171 | 368 161 13/220 84 12        | 542 316   | 1.38     | 0.2399331     | 1  | 1.61   | 0.72       | 3.56            |
| PBCS1    | 1    | 0.138 0.156 | 373 123 8/259 76 17         | 504 352   | 7.68     | 0.0055707     | 1  | 3.15   | 1.34       | 7.37            |
| PLCO     | 7    | 0.156 0.160 | 688 270 17/318 117 13       | 975 448   | 2.00     | 0.1578017     | 1  | 1.68   | 0.81       | 3.50            |
| WHI      | 8    | 0.155 0.158 | 1704 665 40/1244 447 51     | 2409 1742 | 7.57     | 0.0059299     | 1  | 1.79   | 1.18       | 2.71            |

|          |    |             |                         |           |      |           |   |      |      |      |
|----------|----|-------------|-------------------------|-----------|------|-----------|---|------|------|------|
| STAGE3   | 17 | 0.157 0.160 | 2562 957 86 1133 431 41 | 3605 1605 | 0.13 | 0.7150545 | 1 | 1.07 | 0.74 | 1.56 |
| NHS2     | 21 | 0.167 0.153 | 811 332 30 254 88 10    | 1173 352  | 0.09 | 0.7704796 | 1 | 1.11 | 0.54 | 2.30 |
| PBCS2    | 11 | 0.148 0.158 | 1266 440 38/496 184 18  | 1744 698  | 0.36 | 0.5508571 | 1 | 1.19 | 0.67 | 2.10 |
| WHS      | 21 | 0.161 0.167 | 485 185 18/383 159 13   | 688 555   | 0.09 | 0.7581667 | 1 | 0.89 | 0.43 | 1.84 |
| PBCS 1+2 | 1  | 0.146 0.157 | 1639 563 47/755 260 35  | 2249 1050 | 4.57 | 0.0326001 | 1 | 1.62 | 1.04 | 2.52 |

Locus Alleles Chr Location Neighborhood  
rs7716600 C|A 5p12 44910762

| SUBSET   | Rank | MAF         | Geno Counts                 | Subjects  | score X2 | score p-value | df | hom OR | hom OR 95% | hom OR 95% CI_u |
|----------|------|-------------|-----------------------------|-----------|----------|---------------|----|--------|------------|-----------------|
| STAGE1-3 | 5    | 0.220 0.243 | 5595 3136 452/3042 1901 333 | 9183 5276 | 12.60    | 0.0003858     | 1  | 1.30   | 1.12       | 1.51            |
| NHS      | 2    | 0.215 0.253 | 693 401 44/451 303 53       | 1138 807  | 7.27     | 0.007011      | 1  | 1.75   | 1.16       | 2.63            |
| STAGE1-2 | 1    | 0.216 0.249 | 3402 1923 241/2095 1316 253 | 5566 3664 | 28.92    | 7.524E-08     | 1  | 1.64   | 1.37       | 1.97            |
| STAGE2   | 1    | 0.216 0.247 | 2709 1522 197/1644 1013 200 | 4428 2857 | 21.94    | 0.000002815   | 1  | 1.62   | 1.32       | 1.98            |
| CPSII    | 8    | 0.225 0.241 | 325 192 26/186 108 22       | 543 316   | 1.79     | 0.1810222     | 1  | 1.49   | 0.83       | 2.67            |
| PBCS1    | 7    | 0.217 0.272 | 308 173 23/186 139 26       | 504 351   | 3.10     | 0.0784145     | 1  | 1.67   | 0.94       | 2.98            |
| PLCO     | 13   | 0.223 0.232 | 577 359 37/261 166 21       | 973 448   | 0.61     | 0.433492      | 1  | 1.24   | 0.72       | 2.15            |
| WHI      | 3    | 0.212 0.247 | 1499 798 111/1011 600 131   | 2408 1742 | 15.59    | 0.00007858    | 1  | 1.68   | 1.30       | 2.18            |
| STAGE3   | 6    | 0.226 0.231 | 2193 1215 211/948 587 79    | 3619 1614 | 1.87     | 0.1718419     | 1  | 0.83   | 0.64       | 1.08            |
| NHS2     | 8    | 0.227 0.232 | 712 397 69/205 131 16       | 1178 352  | 0.89     | 0.3457414     | 1  | 0.77   | 0.44       | 1.34            |
| PBCS2    | 21   | 0.223 0.233 | 1070 586 98/417 254 38      | 1754 709  | 0.05     | 0.8228516     | 1  | 0.96   | 0.65       | 1.41            |
| WHS      | 6    | 0.233 0.228 | 411 232 44/326 202 25       | 687 553   | 2.07     | 0.1503034     | 1  | 0.69   | 0.42       | 1.15            |
| PBCS 1+2 | 13   | 0.221 0.246 | 1378 757 121/602 391 65     | 2256 1058 | 0.83     | 0.3629784     | 1  | 1.16   | 0.85       | 1.58            |

Locus Alleles Chr Location Neighborhood  
rs2067980 A|G 5p12 45018074

| SUBSET   | Rank | MAF         | Geno Counts                 | Subjects  | score X2 | score p-value | df | hom OR | hom OR 95% | hom OR 95% CI_u |
|----------|------|-------------|-----------------------------|-----------|----------|---------------|----|--------|------------|-----------------|
| STAGE1-3 | 6    | 0.161 0.176 | 6467 2446 251/3610 1460 197 | 9164 5267 | 11.15    | 0.0008413     | 1  | 1.38   | 1.14       | 1.67            |
| NHS      | 7    | 0.151 0.179 | 814 310 17/542 240 24       | 1141 806  | 5.07     | 0.0243221     | 1  | 2.03   | 1.08       | 3.80            |
| STAGE1-2 | 3    | 0.151 0.176 | 4007 1454 114/2510 1021 135 | 5575 3666 | 22.62    | 0.000001972   | 1  | 1.83   | 1.42       | 2.36            |
| STAGE2   | 2    | 0.151 0.175 | 3193 1144 97/1968 781 111   | 4434 2860 | 18.00    | 0.00002211    | 1  | 1.81   | 1.37       | 2.38            |
| CPSII    | 6    | 0.159 0.171 | 383 147 13/221 82 13        | 543 316   | 2.01     | 0.155965      | 1  | 1.75   | 0.80       | 3.82            |
| PBCS1    | 17   | 0.191 0.231 | 335 149 22/208 127 18       | 506 353   | 0.26     | 0.6071267     | 1  | 1.18   | 0.62       | 2.24            |
| PLCO     | 9    | 0.144 0.156 | 714 241 20/322 112 14       | 975 448   | 1.52     | 0.2180204     | 1  | 1.54   | 0.77       | 3.08            |
| WHI      | 2    | 0.143 0.170 | 1761 607 42/1217 460 66     | 2410 1743 | 16.68    | 0.00004422    | 1  | 2.22   | 1.50       | 3.28            |
| STAGE3   | 23   | 0.176 0.176 | 2460 993 137/1100 440 62    | 3590 1602 | 0.01     | 0.9254086     | 1  | 1.01   | 0.75       | 1.38            |
| NHS2     | 15   | 0.170 0.162 | 810 306 44/249 82 15        | 1160 346  | 0.21     | 0.6482546     | 1  | 1.15   | 0.63       | 2.09            |
| PBCS2    | 16   | 0.190 0.188 | 1158 519 73/467 211 27      | 1750 705  | 0.15     | 0.698424      | 1  | 0.91   | 0.58       | 1.44            |
| WHS      | 14   | 0.153 0.170 | 492 168 20/384 147 20       | 680 551   | 0.46     | 0.4980657     | 1  | 1.24   | 0.66       | 2.33            |
| PBCS 1+2 | 23   | 0.190 0.202 | 1493 667 95/675 337 45      | 2255 1057 | 0.00     | 0.9527181     | 1  | 1.01   | 0.70       | 1.45            |

Locus Alleles Chr Location Neighborhood  
rs4415084 C|T 5p12 44698272

| SUBSET   | Rank | MAF         | Geno Counts                  | Subjects  | score X2 | score p-value | df | hom OR | hom OR 95% | hom OR 95% CI_u |
|----------|------|-------------|------------------------------|-----------|----------|---------------|----|--------|------------|-----------------|
| STAGE1-3 | 7    | 0.408 0.430 | 3249 4351 1557/1736 2512 998 | 9157 5246 | 9.33     | 0.0022519     | 1  | 1.15   | 1.05       | 1.25            |
| NHS      | 19   | 0.392 0.437 | 429 513 185/240 421 139      | 1127 800  | 0.31     | 0.5788349     | 1  | 1.07   | 0.84       | 1.36            |
| STAGE1-2 | 12   | 0.403 0.428 | 1986 2660 913/1209 1769 681  | 5559 3659 | 7.38     | 0.006577      | 1  | 1.16   | 1.04       | 1.30            |
| STAGE2   | 11   | 0.406 0.425 | 1557 2147 728/969 1348 542   | 4432 2859 | 7.74     | 0.0053901     | 1  | 1.19   | 1.05       | 1.35            |
| CPSII    | 14   | 0.427 0.389 | 178 265 99/121 144 51        | 542 316   | 0.63     | 0.4289422     | 1  | 0.86   | 0.59       | 1.25            |
| PBCS1    | 11   | 0.410 0.463 | 174 249 83/97 185 71         | 506 353   | 1.95     | 0.1630916     | 1  | 1.28   | 0.90       | 1.82            |
| PLCO     | 14   | 0.408 0.407 | 339 475 160/163 205 80       | 974 448   | 0.45     | 0.5036179     | 1  | 1.11   | 0.82       | 1.49            |
| WHI      | 7    | 0.400 0.429 | 866 1158 386/588 814 340     | 2410 1742 | 8.59     | 0.0033787     | 1  | 1.27   | 1.08       | 1.49            |

|          |    |             |                           |           |      |           |   |      |      |      |
|----------|----|-------------|---------------------------|-----------|------|-----------|---|------|------|------|
| STAGE3   | 3  | 0.414 0.434 | 1263 1694 645 528 747 319 | 3602 1594 | 3.24 | 0.0717365 | 1 | 1.15 | 0.99 | 1.33 |
| NHS2     | 3  | 0.399 0.447 | 436 540 199 111 161 74    | 1175 346  | 3.60 | 0.0579235 | 1 | 1.33 | 0.99 | 1.80 |
| PBCS2    | 14 | 0.424 0.440 | 593 833 328 226 346 140   | 1754 712  | 0.31 | 0.5805729 | 1 | 1.06 | 0.85 | 1.33 |
| WHS      | 11 | 0.414 0.420 | 234 321 118 191 240 105   | 673 536   | 0.84 | 0.3598161 | 1 | 1.15 | 0.86 | 1.53 |
| PBCS 1+2 | 9  | 0.421 0.447 | 767 1079 410 322 527 209  | 2256 1058 | 1.18 | 0.2764535 | 1 | 1.11 | 0.92 | 1.33 |

Locus Alleles Chr Location Neighborhood  
rs379936 A|G 7q21.11 79806994

| SUBSET   | Rank | MAF         | Geno Counts                  | Subjects  | score X2 | score p-value | df | hom OR | hom OR 95% | hom OR 95% CI_u |
|----------|------|-------------|------------------------------|-----------|----------|---------------|----|--------|------------|-----------------|
| STAGE1-3 | 8    | 0.384 0.367 | 3487 4138 1398 2078 2378 707 | 9023 5163 | 8.42     | 0.0037087     | 1  | 0.87   | 0.78       | 0.95            |
| NHS      | 17   | 0.399 0.362 | 403 541 177 333 343 115      | 1121 791  | 0.56     | 0.4539279     | 1  | 0.91   | 0.70       | 1.17            |
| STAGE1-2 | 6    | 0.398 0.363 | 1839 2287 832 1325 1468 438  | 4958 3231 | 15.52    | 0.00008143    | 1  | 0.78   | 0.69       | 0.88            |
| STAGE2   | 4    | 0.398 0.363 | 1436 1746 655 992 1125 323   | 3837 2440 | 16.66    | 0.00004473    | 1  | 0.74   | 0.64       | 0.86            |
| CPSII    | 17   | 0.387 0.355 | 199 251 79 131 139 41        | 529 311   | 0.49     | 0.4838577     | 1  | 0.87   | 0.58       | 1.30            |
| PLCO     | 20   | 0.378 0.372 | 379 431 146 181 186 69       | 956 436   | 0.07     | 0.7909014     | 1  | 1.04   | 0.76       | 1.42            |
| WHI      | 1    | 0.409 0.362 | 858 1064 430 680 800 213     | 2352 1693 | 23.93    | 9.978E-07     | 1  | 0.64   | 0.54       | 0.77            |
| STAGE3   | 16   | 0.368 0.374 | 1455 1636 504 624 763 219    | 3595 1606 | 0.14     | 0.7121599     | 1  | 0.97   | 0.82       | 1.15            |
| NHS2     | 12   | 0.371 0.399 | 475 529 171 128 174 56       | 1175 358  | 0.26     | 0.611439      | 1  | 1.09   | 0.78       | 1.51            |
| PBCS2    | 3    | 0.368 0.360 | 706 782 248 283 324 88       | 1736 695  | 1.10     | 0.2945485     | 1  | 0.87   | 0.67       | 1.13            |
| WHS      | 17   | 0.362 0.375 | 274 325 85 213 265 75        | 684 553   | 0.35     | 0.5540625     | 1  | 1.11   | 0.79       | 1.54            |
| PBCS 1+2 | 16   | 0.367 0.366 | 899 997 310 412 471 138      | 2206 1021 | 0.17     | 0.681906      | 1  | 0.96   | 0.77       | 1.19            |

Locus Alleles Chr Location Neighborhood  
rs998592 G|A 16p13.13 11107179 CLEC16A

| SUBSET   | Rank | MAF         | Geno Counts                  | Subjects  | score X2 | score p-value | df | hom OR | hom OR 95% | hom OR 95% CI_u |
|----------|------|-------------|------------------------------|-----------|----------|---------------|----|--------|------------|-----------------|
| STAGE1-3 | 9    | 0.426 0.418 | 3060 4399 1711 1751 2638 885 | 9170 5274 | 8.01     | 0.0046465     | 1  | 0.88   | 0.80       | 0.96            |
| NHS      | 10   | 0.424 0.429 | 405 502 232 253 415 139      | 1139 807  | 3.03     | 0.0819018     | 1  | 0.81   | 0.64       | 1.03            |
| STAGE1-2 | 10   | 0.438 0.425 | 1803 2653 1117 1181 1857 629 | 5573 3667 | 12.05    | 0.0005168     | 1  | 0.83   | 0.74       | 0.92            |
| STAGE2   | 8    | 0.442 0.423 | 1398 2151 885 928 1442 490   | 4434 2860 | 9.08     | 0.0025842     | 1  | 0.83   | 0.73       | 0.94            |
| CPSII    | 1    | 0.475 0.416 | 158 254 131 107 155 54       | 543 316   | 5.85     | 0.0155507     | 1  | 0.65   | 0.46       | 0.92            |
| PBCS1    | 2    | 0.415 0.368 | 186 220 100 141 164 48       | 506 353   | 5.54     | 0.018565      | 1  | 0.64   | 0.44       | 0.93            |
| PLCO     | 10   | 0.419 0.393 | 324 485 166 162 220 66       | 975 448   | 1.18     | 0.2766909     | 1  | 0.84   | 0.62       | 1.15            |
| WHI      | 16   | 0.450 0.444 | 730 1192 488 518 903 322     | 2410 1743 | 2.03     | 0.1542261     | 1  | 0.89   | 0.76       | 1.04            |
| STAGE3   | 15   | 0.408 0.402 | 1257 1746 595 570 782 256    | 3598 1608 | 0.31     | 0.5783226     | 1  | 0.96   | 0.81       | 1.12            |
| NHS2     | 13   | 0.418 0.423 | 394 568 202 119 167 65       | 1164 351  | 0.25     | 0.6157211     | 1  | 1.08   | 0.79       | 1.47            |
| PBCS2    | 15   | 0.400 0.386 | 625 849 274 266 333 105      | 1748 704  | 0.22     | 0.637522      | 1  | 0.94   | 0.74       | 1.20            |
| WHS      | 12   | 0.413 0.410 | 238 329 119 185 282 86       | 686 553   | 0.71     | 0.3978631     | 1  | 0.88   | 0.65       | 1.19            |
| PBCS 1+2 | 4    | 0.403 0.380 | 811 1069 373 407 496 153     | 2253 1056 | 2.30     | 0.1295486     | 1  | 0.85   | 0.70       | 1.05            |

Locus Alleles Chr Location Neighborhood  
rs12608723 A|G 19q13.11 38508973

| SUBSET   | Rank | MAF         | Geno Counts                | Subjects  | score X2 | score p-value | df | hom OR | hom OR 95% | hom OR 95% CI_u |
|----------|------|-------------|----------------------------|-----------|----------|---------------|----|--------|------------|-----------------|
| STAGE1-3 | 10   | 0.137 0.121 | 6878 2122 195 4075 1120 78 | 9195 5273 | 7.45     | 0.0063476     | 1  | 0.69   | 0.53       | 0.90            |
| NHS      | 14   | 0.153 0.121 | 818 296 27 624 169 13      | 1141 806  | 1.33     | 0.2483563     | 1  | 0.68   | 0.35       | 1.32            |
| STAGE1-2 | 13   | 0.143 0.121 | 4102 1351 122 2831 783 52  | 5575 3666 | 7.10     | 0.0077256     | 1  | 0.64   | 0.46       | 0.89            |
| STAGE2   | 13   | 0.140 0.121 | 3284 1055 95 2207 614 39   | 4434 2860 | 5.85     | 0.0155871     | 1  | 0.63   | 0.43       | 0.92            |
| CPSII    | 16   | 0.140 0.114 | 398 138 7 250 60 6         | 543 316   | 0.50     | 0.4803668     | 1  | 1.48   | 0.49       | 4.45            |
| PBCS1    | 6    | 0.153 0.110 | 364 129 13 278 72 3        | 506 353   | 3.36     | 0.0666912     | 1  | 0.33   | 0.09       | 1.15            |
| PLCO     | 5    | 0.132 0.116 | 738 216 21 348 96 4        | 975 448   | 2.83     | 0.0926398     | 1  | 0.41   | 0.14       | 1.20            |
| WHI      | 15   | 0.141 0.126 | 1784 572 54 1331 386 26    | 2410 1743 | 3.00     | 0.0830891     | 1  | 0.66   | 0.41       | 1.06            |
| STAGE3   | 10   | 0.127 0.122 | 2778 774 73 1244 340 26    | 3625 1610 | 0.96     | 0.3281797     | 1  | 0.80   | 0.51       | 1.25            |

|          |    |             |                        |           |      |           |   |      |      |      |
|----------|----|-------------|------------------------|-----------|------|-----------|---|------|------|------|
| NHS2     | 17 | 0.127 0.117 | 907 259 21 272 72 5    | 1187 349  | 0.18 | 0.668363  | 1 | 0.81 | 0.30 | 2.16 |
| PBCS2    | 20 | 0.124 0.119 | 1344 368 32/554 145 12 | 1744 711  | 0.06 | 0.8032196 | 1 | 0.92 | 0.47 | 1.79 |
| WHS      | 5  | 0.135 0.128 | 527 147 20/418 123 9   | 694 550   | 2.09 | 0.1482212 | 1 | 0.56 | 0.25 | 1.24 |
| PBCS 1+2 | 6  | 0.130 0.115 | 1706 494 45/832 214 15 | 2245 1061 | 1.41 | 0.2349268 | 1 | 0.70 | 0.39 | 1.26 |

Locus rs17740709 Alleles A|G Chr 12q21.31 Location Neighborhood 81947471 TMTC2

| SUBSET   | Rank | MAF         | Geno Counts                 | Subjects  | score X2 | score p-value | df | hom OR | hom OR 95% | hom OR 95% CI_u |
|----------|------|-------------|-----------------------------|-----------|----------|---------------|----|--------|------------|-----------------|
| STAGE1-3 | 11   | 0.220 0.219 | 5556 3162 430/3251 1707 300 | 9148 5258 | 7.01     | 0.008097      | 1  | 1.23   | 1.05       | 1.43            |
| NHS      | 6    | 0.218 0.222 | 691 402 48/502 251 54       | 1141 807  | 5.88     | 0.0153071     | 1  | 1.63   | 1.09       | 2.44            |
| STAGE1-2 | 8    | 0.218 0.216 | 3371 1979 225/2293 1165 209 | 5575 3667 | 13.68    | 0.0002169     | 1  | 1.44   | 1.18       | 1.74            |
| STAGE2   | 10   | 0.218 0.214 | 2680 1577 177/1791 914 155  | 4434 2860 | 8.16     | 0.0042896     | 1  | 1.38   | 1.11       | 1.72            |
| CPSII    | 11   | 0.215 0.199 | 328 197 18/205 96 15        | 543 316   | 1.11     | 0.29236       | 1  | 1.45   | 0.72       | 2.93            |
| PBCS1    | 9    | 0.242 0.245 | 282 203 21/203 127 23       | 506 353   | 2.39     | 0.1218072     | 1  | 1.61   | 0.88       | 2.96            |
| PLCO     | 16   | 0.214 0.218 | 603 326 46/277 147 24       | 975 448   | 0.27     | 0.604584      | 1  | 1.14   | 0.69       | 1.90            |
| WHI      | 9    | 0.215 0.209 | 1467 851 92/1106 544 93     | 2410 1743 | 5.48     | 0.0192615     | 1  | 1.42   | 1.06       | 1.91            |
| STAGE3   | 24   | 0.223 0.228 | 2185 1184 205/958 544 91    | 3574 1593 | 0.00     | 0.9733611     | 1  | 1.00   | 0.77       | 1.28            |
| NHS2     | 19   | 0.211 0.211 | 723 368 59/214 112 16       | 1150 342  | 0.11     | 0.7369296     | 1  | 0.91   | 0.52       | 1.60            |
| PBCS2    | 10   | 0.234 0.254 | 1042 597 112/398 260 50     | 1751 708  | 0.36     | 0.5467592     | 1  | 1.11   | 0.79       | 1.57            |
| WHS      | 20   | 0.213 0.204 | 420 219 34/346 172 25       | 673 543   | 0.13     | 0.7177835     | 1  | 0.91   | 0.53       | 1.54            |
| PBCS 1+2 | 8    | 0.236 0.251 | 1324 799 133/601 385 73     | 2256 1059 | 1.23     | 0.2671293     | 1  | 1.18   | 0.88       | 1.59            |

Locus rs3817198 Alleles T|C Chr 11p15.5 Location Neighborhood 1865582 LSP1

| SUBSET   | Rank | MAF         | Geno Counts                 | Subjects  | score X2 | score p-value | df | hom OR | hom OR 95% | hom OR 95% CI_u |
|----------|------|-------------|-----------------------------|-----------|----------|---------------|----|--------|------------|-----------------|
| STAGE1-3 | 12   | 0.325 0.335 | 4170 4041 961/2368 2287 625 | 9172 5280 | 6.34     | 0.0118045     | 1  | 1.15   | 1.03       | 1.28            |
| NHS      | 12   | 0.318 0.328 | 524 509 108/373 339 95      | 1141 807  | 2.69     | 0.1007232     | 1  | 1.28   | 0.95       | 1.71            |
| STAGE1-2 | 17   | 0.326 0.337 | 2533 2437 597/1631 1595 436 | 5567 3662 | 3.11     | 0.0780255     | 1  | 1.13   | 0.99       | 1.28            |
| STAGE2   | 19   | 0.328 0.339 | 2009 1928 489/1258 1256 341 | 4426 2855 | 1.38     | 0.2403937     | 1  | 1.09   | 0.94       | 1.27            |
| CPSII    | 21   | 0.334 0.340 | 243 231 64/139 138 38       | 538 315   | 0.01     | 0.9419659     | 1  | 1.02   | 0.66       | 1.56            |
| PBCS1    | 15   | 0.319 0.326 | 229 228 47/161 150 39       | 504 350   | 0.75     | 0.3854013     | 1  | 1.22   | 0.78       | 1.91            |
| PLCO     | 6    | 0.335 0.334 | 440 417 118/190 215 42      | 975 447   | 2.25     | 0.1337508     | 1  | 0.75   | 0.52       | 1.09            |
| WHI      | 11   | 0.326 0.343 | 1097 1052 260/768 753 222   | 2409 1743 | 3.72     | 0.0536434     | 1  | 1.21   | 1.00       | 1.46            |
| STAGE3   | 4    | 0.324 0.331 | 1636 1605 364/734 693 189   | 3605 1616 | 3.01     | 0.082724      | 1  | 1.18   | 0.98       | 1.42            |
| NHS2     | 9    | 0.320 0.331 | 538 516 117/162 155 41      | 1171 358  | 0.63     | 0.4267461     | 1  | 1.17   | 0.80       | 1.70            |
| PBCS2    | 4    | 0.330 0.330 | 789 789 189/326 301 84      | 1767 711  | 0.65     | 0.4212886     | 1  | 1.12   | 0.85       | 1.47            |
| WHS      | 4    | 0.312 0.334 | 309 300 58/246 237 64       | 667 547   | 3.00     | 0.0832001     | 1  | 1.39   | 0.96       | 2.02            |
| PBCS 1+2 | 10   | 0.328 0.327 | 1019 1016 236/490 450 123   | 2271 1063 | 1.05     | 0.3060267     | 1  | 1.13   | 0.90       | 1.42            |

Locus rs17570439 Alleles T|C Chr 1p34.2 Location Neighborhood 40096797 TRIT1

| SUBSET   | Rank | MAF         | Geno Counts                 | Subjects  | score X2 | score p-value | df | hom OR | hom OR 95% | hom OR 95% CI_u |
|----------|------|-------------|-----------------------------|-----------|----------|---------------|----|--------|------------|-----------------|
| STAGE1-3 | 13   | 0.208 0.224 | 5732 3020 388/3177 1825 269 | 9140 5271 | 5.66     | 0.0173535     | 1  | 1.21   | 1.03       | 1.42            |
| NHS      | 8    | 0.204 0.245 | 718 381 42/457 304 46       | 1141 807  | 4.47     | 0.034541      | 1  | 1.58   | 1.03       | 2.43            |
| STAGE1-2 | 5    | 0.207 0.228 | 3472 1895 208/2196 1270 201 | 5575 3667 | 16.02    | 0.00006257    | 1  | 1.50   | 1.23       | 1.82            |
| STAGE2   | 7    | 0.208 0.223 | 2754 1514 166/1739 966 155  | 4434 2860 | 11.60    | 0.0006578     | 1  | 1.47   | 1.18       | 1.84            |
| CPSII    | 4    | 0.196 0.201 | 343 187 13/203 99 14        | 543 316   | 2.72     | 0.0990607     | 1  | 1.89   | 0.88       | 4.07            |
| PBCS1    | 5    | 0.210 0.215 | 310 179 17/223 108 22       | 506 353   | 3.96     | 0.0466194     | 1  | 1.91   | 1.00       | 3.66            |
| PLCO     | 22   | 0.220 0.238 | 599 323 53/259 165 24       | 975 448   | 0.00     | 0.951368      | 1  | 0.98   | 0.60       | 1.62            |
| WHI      | 5    | 0.206 0.225 | 1502 825 83/1054 594 95     | 2410 1743 | 9.93     | 0.0016301     | 1  | 1.62   | 1.20       | 2.18            |
| STAGE3   | 8    | 0.208 0.215 | 2260 1126 180/981 555 68    | 3566 1604 | 1.58     | 0.2083731     | 1  | 0.83   | 0.63       | 1.11            |

|          |    |             |                         |           |      |           |   |      |      |      |
|----------|----|-------------|-------------------------|-----------|------|-----------|---|------|------|------|
| NHS2     | 20 | 0.206 0.232 | 730 346 61 201 125 17   | 1137 343  | 0.09 | 0.7665113 | 1 | 0.92 | 0.53 | 1.60 |
| PBCS2    | 23 | 0.208 0.210 | 1111 557 86 448 228 35  | 1754 711  | 0.00 | 0.9837487 | 1 | 1.00 | 0.67 | 1.50 |
| WHS      | 3  | 0.214 0.213 | 419 223 33 332 202 16   | 675 550   | 3.09 | 0.0786087 | 1 | 0.58 | 0.32 | 1.07 |
| PBCS 1+2 | 11 | 0.208 0.211 | 1421 735 103 671 336 57 | 2259 1064 | 1.00 | 0.3163395 | 1 | 1.18 | 0.85 | 1.65 |

Locus rs1274466 Alleles T|C Chr 10p11.21 Location Neighborhood 34510210 PARD3

| SUBSET   | Rank | MAF         | Geno Counts                   | Subjects  | score X2 | score p-value | df | hom OR | hom OR 95% | hom OR 95% CI_u |
|----------|------|-------------|-------------------------------|-----------|----------|---------------|----|--------|------------|-----------------|
| STAGE1-3 | 14   | 0.452 0.433 | 2783 4512 1894 1706 2563 1004 | 9189 5273 | 5.16     | 0.0230869     | 1  | 0.91   | 0.83       | 0.99            |
| NHS      | 15   | 0.470 0.436 | 312 585 244 261 388 158       | 1141 807  | 0.94     | 0.3319155     | 1  | 0.90   | 0.72       | 1.12            |
| STAGE1-2 | 16   | 0.456 0.429 | 1656 2756 1163 1213 1761 692  | 5575 3666 | 5.43     | 0.0197868     | 1  | 0.88   | 0.79       | 0.98            |
| STAGE2   | 15   | 0.452 0.427 | 1344 2171 919 952 1373 534    | 4434 2859 | 4.57     | 0.0325109     | 1  | 0.88   | 0.78       | 0.99            |
| CPSII    | 15   | 0.471 0.440 | 152 271 120 101 152 63        | 543 316   | 0.56     | 0.4553495     | 1  | 0.88   | 0.62       | 1.24            |
| PBCS1    | 14   | 0.483 0.457 | 138 247 121 104 174 74        | 506 352   | 0.99     | 0.320362      | 1  | 0.85   | 0.61       | 1.18            |
| PLCO     | 2    | 0.449 0.391 | 298 478 199 167 212 69        | 975 448   | 5.04     | 0.0248099     | 1  | 0.71   | 0.53       | 0.96            |
| WHI      | 19   | 0.443 0.428 | 756 1175 479 580 835 328      | 2410 1743 | 0.72     | 0.3953748     | 1  | 0.93   | 0.80       | 1.09            |
| STAGE3   | 14   | 0.445 0.444 | 1127 1760 732 493 802 313     | 3619 1608 | 0.40     | 0.5252787     | 1  | 0.95   | 0.82       | 1.11            |
| NHS2     | 10   | 0.441 0.429 | 379 559 240 114 168 65        | 1178 347  | 0.45     | 0.5016616     | 1  | 0.90   | 0.66       | 1.22            |
| PBCS2    | 7    | 0.457 0.451 | 518 863 368 211 357 141       | 1749 709  | 0.41     | 0.5225985     | 1  | 0.93   | 0.75       | 1.16            |
| WHS      | 15   | 0.423 0.445 | 230 338 124 168 277 107       | 692 552   | 0.44     | 0.5091459     | 1  | 1.10   | 0.83       | 1.47            |
| PBCS 1+2 | 12   | 0.463 0.452 | 656 1106 488 315 531 214      | 2250 1060 | 0.97     | 0.3245666     | 1  | 0.91   | 0.76       | 1.09            |

Locus rs2391406 Alleles T|G Chr 13q33.3 Location Neighborhood 106586873

| SUBSET   | Rank | MAF         | Geno Counts                  | Subjects  | score X2 | score p-value | df | hom OR | hom OR 95% | hom OR 95% CI_u |
|----------|------|-------------|------------------------------|-----------|----------|---------------|----|--------|------------|-----------------|
| STAGE1-3 | 15   | 0.372 0.367 | 3658 4164 1315 2088 2463 694 | 9137 5245 | 3.73     | 0.0533315     | 1  | 0.91   | 0.82       | 1.00            |
| NHS      | 20   | 0.371 0.366 | 452 529 159 323 377 107      | 1140 807  | 0.19     | 0.6630609     | 1  | 0.94   | 0.72       | 1.23            |
| STAGE1-2 | 9    | 0.374 0.363 | 2234 2499 829 1453 1759 451  | 5562 3663 | 12.42    | 0.0004247     | 1  | 0.80   | 0.71       | 0.91            |
| STAGE2   | 6    | 0.374 0.362 | 1782 1970 670 1130 1382 344  | 4422 2856 | 13.97    | 0.0001861     | 1  | 0.77   | 0.67       | 0.88            |
| CPSII    | 3    | 0.371 0.339 | 217 240 79 132 150 31        | 536 313   | 4.10     | 0.0429967     | 1  | 0.64   | 0.41       | 0.99            |
| PBCS1    | 4    | 0.387 0.375 | 195 230 81 125 190 37        | 506 352   | 5.29     | 0.0214797     | 1  | 0.62   | 0.41       | 0.93            |
| PLCO     | 4    | 0.376 0.360 | 398 416 157 180 213 55       | 971 448   | 3.65     | 0.0559238     | 1  | 0.73   | 0.52       | 1.01            |
| WHI      | 13   | 0.372 0.365 | 972 1084 353 693 829 221     | 2409 1743 | 3.31     | 0.0689402     | 1  | 0.85   | 0.71       | 1.01            |
| STAGE3   | 5    | 0.369 0.376 | 1424 1669 486 635 705 243    | 3579 1583 | 2.84     | 0.091965      | 1  | 1.15   | 0.98       | 1.36            |
| NHS2     | 1    | 0.344 0.402 | 510 503 148 129 162 60       | 1161 351  | 4.29     | 0.0383039     | 1  | 1.41   | 1.02       | 1.96            |
| PBCS2    | 2    | 0.380 0.381 | 656 853 236 275 321 108      | 1745 704  | 1.37     | 0.2416372     | 1  | 1.16   | 0.91       | 1.48            |
| WHS      | 18   | 0.384 0.352 | 258 313 102 231 222 75       | 673 528   | 0.21     | 0.6442998     | 1  | 0.93   | 0.67       | 1.28            |
| PBCS 1+2 | 18   | 0.381 0.379 | 851 1079 317 400 510 145     | 2247 1055 | 0.08     | 0.7788188     | 1  | 0.97   | 0.79       | 1.20            |

Locus rs4666451 Alleles G|A Chr 2p24.1 Location Neighborhood 19150424

| SUBSET   | Rank | MAF         | Geno Counts                  | Subjects  | score X2 | score p-value | df | hom OR | hom OR 95% | hom OR 95% CI_u |
|----------|------|-------------|------------------------------|-----------|----------|---------------|----|--------|------------|-----------------|
| STAGE1-3 | 16   | 0.394 0.386 | 2956 3804 1260 1679 2133 657 | 8020 4469 | 2.25     | 0.1335615     | 1  | 0.92   | 0.83       | 1.02            |
| STAGE1-2 | 18   | 0.397 0.384 | 1622 2102 710 1078 1366 416  | 4434 2860 | 2.87     | 0.0904203     | 1  | 0.89   | 0.78       | 1.02            |
| STAGE2   | 17   | 0.397 0.384 | 1622 2102 710 1078 1366 416  | 4434 2860 | 2.87     | 0.0904203     | 1  | 0.89   | 0.78       | 1.02            |
| CPSII    | 10   | 0.394 0.413 | 201 256 86 96 179 41         | 543 316   | 1.30     | 0.2542451     | 1  | 0.79   | 0.53       | 1.18            |
| PBCS1    | 16   | 0.409 0.375 | 176 246 84 140 161 52        | 506 353   | 0.55     | 0.4601163     | 1  | 0.87   | 0.60       | 1.26            |
| PLCO     | 12   | 0.393 0.394 | 355 474 146 170 203 75       | 975 448   | 0.73     | 0.3927744     | 1  | 1.14   | 0.84       | 1.55            |
| WHI      | 12   | 0.397 0.378 | 890 1126 394 672 823 248     | 2410 1743 | 3.48     | 0.0621486     | 1  | 0.85   | 0.71       | 1.01            |
| STAGE3   | 19   | 0.390 0.388 | 1336 1703 550 601 769 241    | 3589 1611 | 0.11     | 0.7347201     | 1  | 0.97   | 0.82       | 1.15            |
| NHS2     | 4    | 0.384 0.369 | 446 528 178 134 171 43       | 1152 348  | 2.04     | 0.1534131     | 1  | 0.77   | 0.54       | 1.10            |



|          |    |             |                          |           |      |           |   |      |      |      |
|----------|----|-------------|--------------------------|-----------|------|-----------|---|------|------|------|
| PBCS2    | 5  | 0.399 0.398 | 621 858 268 263 330 118  | 1747 711  | 0.60 | 0.4378246 | 1 | 1.10 | 0.87 | 1.39 |
| WHS      | 22 | 0.380 0.388 | 269 317 104 204 268 80   | 690 552   | 0.08 | 0.7750556 | 1 | 0.96 | 0.70 | 1.31 |
| PBCS 1+2 | 19 | 0.402 0.390 | 795 1103 352 403 489 170 | 2250 1062 | 0.07 | 0.7889656 | 1 | 1.03 | 0.84 | 1.25 |

Locus Alleles Chr Location Neighborhood  
rs11077820 T|C 17q25.1 71966263 UBE2O,AANAT

| SUBSET   | Rank | MAF         | Geno Counts                  | Subjects  | score X2 | score p-value | df | hom OR | hom OR 95% | hom OR 95% CI_u |
|----------|------|-------------|------------------------------|-----------|----------|---------------|----|--------|------------|-----------------|
| STAGE1-3 | 17   | 0.372 0.367 | 3584 4307 1250 2153 2342 760 | 9141 5255 | 1.72     | 0.1892115     | 1  | 1.07   | 0.97       | 1.18            |
| NHS      | 16   | 0.382 0.374 | 429 553 159 329 353 125      | 1141 807  | 0.92     | 0.3382698     | 1  | 1.13   | 0.88       | 1.46            |
| STAGE1-2 | 19   | 0.380 0.368 | 2081 2738 749 1502 1623 538  | 5568 3663 | 2.81     | 0.0936107     | 1  | 1.11   | 0.98       | 1.25            |
| STAGE2   | 18   | 0.380 0.367 | 1652 2185 590 1173 1270 413  | 4427 2856 | 1.88     | 0.1705393     | 1  | 1.10   | 0.96       | 1.26            |
| CPSII    | 12   | 0.377 0.359 | 216 242 83 131 143 42        | 541 316   | 0.67     | 0.4118547     | 1  | 0.85   | 0.57       | 1.26            |
| PBCS1    | 18   | 0.375 0.334 | 193 244 67 160 150 43        | 504 353   | 0.23     | 0.6318276     | 1  | 0.90   | 0.60       | 1.36            |
| PLCO     | 18   | 0.371 0.354 | 371 484 120 188 200 58       | 975 446   | 0.14     | 0.7126985     | 1  | 1.07   | 0.76       | 1.49            |
| WHI      | 10   | 0.385 0.378 | 872 1215 320 694 777 270     | 2407 1741 | 4.06     | 0.0439603     | 1  | 1.20   | 1.00       | 1.43            |
| STAGE3   | 22   | 0.360 0.365 | 1503 1568 502 651 720 222    | 3573 1593 | 0.01     | 0.9133134     | 1  | 0.99   | 0.84       | 1.17            |
| NHS2     | 24   | 0.364 0.373 | 470 516 158 136 163 48       | 1144 347  | 0.00     | 0.9918265     | 1  | 1.00   | 0.71       | 1.42            |
| PBCS2    | 12   | 0.359 0.382 | 732 784 238 269 335 102      | 1754 706  | 0.33     | 0.5678786     | 1  | 1.08   | 0.84       | 1.38            |
| WHS      | 7    | 0.356 0.339 | 301 268 106 246 222 72       | 675 540   | 1.35     | 0.2456185     | 1  | 0.83   | 0.60       | 1.14            |
| PBCS 1+2 | 21   | 0.362 0.366 | 925 1029 304 429 484 145     | 2258 1058 | 0.04     | 0.8495183     | 1  | 1.02   | 0.83       | 1.26            |

Locus Alleles Chr Location Neighborhood  
rs724244 C|T 3p24.1 27217157 NEK10

| SUBSET   | Rank | MAF         | Geno Counts                 | Subjects  | score X2 | score p-value | df | hom OR | hom OR 95% | hom OR 95% CI_u |
|----------|------|-------------|-----------------------------|-----------|----------|---------------|----|--------|------------|-----------------|
| STAGE1-3 | 18   | 0.260 0.274 | 4413 3055 562 2365 1767 340 | 8030 4472 | 1.57     | 0.2108051     | 1  | 1.09   | 0.95       | 1.26            |
| STAGE1-2 | 14   | 0.252 0.275 | 2473 1688 272 1508 1131 220 | 4433 2859 | 6.72     | 0.0095571     | 1  | 1.28   | 1.06       | 1.53            |
| STAGE2   | 12   | 0.252 0.275 | 2473 1688 272 1508 1131 220 | 4433 2859 | 6.72     | 0.0095571     | 1  | 1.28   | 1.06       | 1.53            |
| CPSII    | 13   | 0.247 0.266 | 309 198 35 173 118 25       | 542 316   | 0.65     | 0.420577      | 1  | 1.24   | 0.73       | 2.12            |
| PBCS1    | 13   | 0.246 0.265 | 293 177 36 198 123 32       | 506 353   | 1.09     | 0.297521      | 1  | 1.30   | 0.79       | 2.14            |
| PLCO     | 3    | 0.230 0.271 | 569 364 42 235 182 30       | 975 447   | 3.68     | 0.054939      | 1  | 1.60   | 0.99       | 2.59            |
| WHI      | 18   | 0.263 0.279 | 1302 949 159 902 708 133    | 2410 1743 | 1.65     | 0.1987933     | 1  | 1.17   | 0.92       | 1.49            |
| STAGE3   | 13   | 0.271 0.272 | 1940 1371 290 857 636 120   | 3601 1613 | 0.58     | 0.4466171     | 1  | 0.92   | 0.74       | 1.15            |
| NHS2     | 16   | 0.270 0.286 | 638 417 105 179 142 29      | 1160 350  | 0.20     | 0.6587086     | 1  | 0.91   | 0.59       | 1.40            |
| PBCS2    | 9    | 0.273 0.265 | 926 696 131 381 280 48      | 1753 709  | 0.37     | 0.5430855     | 1  | 0.90   | 0.64       | 1.27            |
| WHS      | 23   | 0.266 0.271 | 376 258 54 297 214 43       | 688 554   | 0.00     | 0.9546511     | 1  | 0.99   | 0.65       | 1.50            |
| PBCS 1+2 | 22   | 0.267 0.265 | 1219 869 167 579 403 80     | 2255 1062 | 0.02     | 0.8964228     | 1  | 1.02   | 0.77       | 1.34            |

Locus Alleles Chr Location Neighborhood  
rs3134615 G|T 1p34.2 40134653 TRIT1,MYCL1

| SUBSET   | Rank | MAF         | Geno Counts                 | Subjects  | score X2 | score p-value | df | hom OR | hom OR 95% | hom OR 95% CI_u |
|----------|------|-------------|-----------------------------|-----------|----------|---------------|----|--------|------------|-----------------|
| STAGE1-3 | 19   | 0.226 0.243 | 5514 3211 475 3003 1970 297 | 9200 5270 | 1.48     | 0.2234687     | 1  | 1.10   | 0.95       | 1.27            |
| NHS      | 11   | 0.220 0.262 | 689 402 50 433 325 49       | 1141 807  | 2.80     | 0.0943921     | 1  | 1.41   | 0.94       | 2.11            |
| STAGE1-2 | 15   | 0.227 0.247 | 3314 1996 265 2072 1377 218 | 5575 3667 | 6.34     | 0.011799      | 1  | 1.27   | 1.05       | 1.52            |
| STAGE2   | 16   | 0.228 0.243 | 2625 1594 215 1639 1052 169 | 4434 2860 | 3.92     | 0.047765      | 1  | 1.23   | 1.00       | 1.52            |
| CPSII    | 5    | 0.215 0.222 | 326 200 17 193 106 17       | 543 316   | 2.66     | 0.1030429     | 1  | 1.76   | 0.88       | 3.50            |
| PBCS1    | 10   | 0.226 0.231 | 299 185 22 213 117 23       | 506 353   | 1.97     | 0.1606234     | 1  | 1.53   | 0.84       | 2.80            |
| PLCO     | 17   | 0.236 0.253 | 578 334 63 247 175 26       | 975 448   | 0.23     | 0.6340213     | 1  | 0.89   | 0.56       | 1.43            |
| WHI      | 14   | 0.228 0.247 | 1422 875 113 986 654 103    | 2410 1743 | 3.06     | 0.080433      | 1  | 1.28   | 0.97       | 1.68            |
| STAGE3   | 9    | 0.226 0.235 | 2200 1215 210 931 595 80    | 3625 1606 | 1.40     | 0.2366277     | 1  | 0.85   | 0.65       | 1.11            |
| NHS2     | 14   | 0.225 0.244 | 724 388 73 196 131 19       | 1185 346  | 0.21     | 0.6450339     | 1  | 0.89   | 0.53       | 1.49            |
| PBCS2    | 18   | 0.226 0.225 | 1063 591 102 427 240 39     | 1756 706  | 0.08     | 0.7834484     | 1  | 0.95   | 0.65       | 1.39            |

|          |    |             |                         |           |      |           |   |      |      |      |
|----------|----|-------------|-------------------------|-----------|------|-----------|---|------|------|------|
| WHS      | 9  | 0.224 0.242 | 413 236 35 308 224 22   | 684 554   | 0.91 | 0.3387976 | 1 | 0.77 | 0.44 | 1.32 |
| PBCS 1+2 | 17 | 0.226 0.226 | 1362 776 124 640 355 61 | 2262 1056 | 0.12 | 0.7304381 | 1 | 1.06 | 0.77 | 1.45 |

| Locus      | Alleles | Chr         | Location                  | Neighborhood |          |               |    |        |            |                 |
|------------|---------|-------------|---------------------------|--------------|----------|---------------|----|--------|------------|-----------------|
| rs10941679 | A G     | 5p12        |                           | 44742255     |          |               |    |        |            |                 |
| SUBSET     | Rank    | MAF         | Geno Counts               | Subjects     | score X2 | score p-value | df | hom OR | hom OR 95% | hom OR 95% CI_u |
| STAGE1-3   | 20      | 0.259 0.282 | 2233 1539 281 991 791 148 | 4053 1930    | 1.06     | 0.3027903     | 1  | 1.11   | 0.91       | 1.37            |
| STAGE3     | 18      | 0.259 0.277 | 1977 1345 254 830 650 118 | 3576 1598    | 0.13     | 0.7174062     | 1  | 1.04   | 0.83       | 1.31            |
| NHS2       | 5       | 0.255 0.283 | 637 430 76 181 137 30     | 1143 348     | 1.57     | 0.2101805     | 1  | 1.32   | 0.85       | 2.06            |
| PBCS2      | 22      | 0.259 0.288 | 969 667 121 350 308 50    | 1757 708     | 0.02     | 0.8767554     | 1  | 1.03   | 0.73       | 1.45            |
| WHS        | 10      | 0.268 0.259 | 371 248 57 299 205 38     | 676 542      | 0.84     | 0.3581093     | 1  | 0.82   | 0.53       | 1.25            |
| PBCS 1+2   | 7       | 0.259 0.293 | 1225 861 148 511 449 80   | 2234 1040    | 1.25     | 0.2639424     | 1  | 1.17   | 0.89       | 1.56            |

| Locus      | Alleles | Chr         | Location                  | Neighborhood |          |               |    |        |            |                 |
|------------|---------|-------------|---------------------------|--------------|----------|---------------|----|--------|------------|-----------------|
| rs10850145 | C T     | 12q24.13    |                           | 112428512    |          |               |    |        |            |                 |
| SUBSET     | Rank    | MAF         | Geno Counts               | Subjects     | score X2 | score p-value | df | hom OR | hom OR 95% | hom OR 95% CI_u |
| STAGE1-3   | 21      | 0.094 0.109 | 7550 1579 79 4185 1048 54 | 9208 5287    | 0.99     | 0.3205667     | 1  | 1.19   | 0.84       | 1.69            |
| NHS        | 9       | 0.085 0.108 | 951 185 5 642 155 10      | 1141 807     | 3.97     | 0.046358      | 1  | 2.85   | 0.97       | 8.37            |
| STAGE1-2   | 20      | 0.090 0.111 | 4627 896 52 2898 724 43   | 5575 3665    | 1.26     | 0.2621817     | 1  | 1.26   | 0.84       | 1.89            |
| STAGE2     | 22      | 0.091 0.111 | 3676 711 47 2256 569 33   | 4434 2858    | 0.14     | 0.7048053     | 1  | 1.09   | 0.70       | 1.71            |
| CPSII      | 18      | 0.099 0.111 | 444 90 9 250 62 4         | 543 316      | 0.21     | 0.6502727     | 1  | 0.76   | 0.23       | 2.49            |
| PBCS1      | 21      | 0.094 0.123 | 417 83 6 270 79 4         | 506 353      | 0.01     | 0.9435991     | 1  | 0.96   | 0.27       | 3.41            |
| PLCO       | 21      | 0.077 0.106 | 832 135 8 357 87 4        | 975 448      | 0.02     | 0.8897585     | 1  | 1.09   | 0.33       | 3.64            |
| WHI        | 20      | 0.094 0.110 | 1983 403 24 1379 341 21   | 2410 1741    | 0.42     | 0.518391      | 1  | 1.21   | 0.67       | 2.19            |
| STAGE3     | 20      | 0.102 0.107 | 2923 684 27 1289 324 11   | 3634 1624    | 0.07     | 0.795148      | 1  | 0.91   | 0.45       | 1.84            |
| NHS2       | 6       | 0.103 0.100 | 947 218 12 290 59 6       | 1177 355     | 1.06     | 0.3040581     | 1  | 1.67   | 0.62       | 4.48            |
| PBCS2      | 17      | 0.104 0.107 | 1412 338 15 565 143 5     | 1765 713     | 0.14     | 0.7082136     | 1  | 0.82   | 0.30       | 2.28            |
| WHS        | 24      | 0.092 0.110 | 564 128 0 434 122 0       | 692 556      | -        |               | 1  | 1.00   | 1.00       | 1.00            |
| PBCS 1+2   | 20      | 0.102 0.113 | 1829 420 21 833 222 9     | 2270 1064    | 0.05     | 0.8213018     | 1  | 0.91   | 0.42       | 2.00            |

| Locus     | Alleles | Chr         | Location               | Neighborhood     |          |               |    |        |            |                 |
|-----------|---------|-------------|------------------------|------------------|----------|---------------|----|--------|------------|-----------------|
| rs2303659 | G A     | 11q24.3     |                        | 129326474 PRDM10 |          |               |    |        |            |                 |
| SUBSET    | Rank    | MAF         | Geno Counts            | Subjects         | score X2 | score p-value | df | hom OR | hom OR 95% | hom OR 95% CI_u |
| STAGE1-3  | 22      | 0.034 0.026 | 8545 608 10 4997 257 9 | 9163 5263        | 0.97     | 0.3239637     | 1  | 1.57   | 0.64       | 3.86            |
| NHS       | 22      | 0.034 0.026 | 1063 78 0 765 42 0     | 1141 807         | -        |               | 1  | 1.00   | 1.00       | 1.00            |
| STAGE1-2  | 21      | 0.034 0.025 | 5197 376 2 3487 178 2  | 5575 3667        | 0.18     | 0.6729668     | 1  | 1.52   | 0.21       | 10.80           |
| STAGE2    | 21      | 0.034 0.024 | 4134 298 2 2722 136 2  | 4434 2860        | 0.20     | 0.6584003     | 1  | 1.55   | 0.22       | 11.02           |
| CPSII     | 24      | 0.030 0.019 | 510 33 0 305 10 1      | 543 316          |          |               |    |        |            |                 |
| PBCS1     | 22      | 0.033 0.024 | 473 33 0 336 17 0      | 506 353          | -        |               | 1  | 1.00   | 1.00       | 1.00            |
| PLCO      | 24      | 0.036 0.026 | 906 68 1 425 23 0      | 975 448          |          |               |    |        |            |                 |
| WHI       | 23      | 0.034 0.025 | 2245 164 1 1656 86 1   | 2410 1743        | 0.05     | 0.8179558     | 1  | 1.38   | 0.09       | 22.12           |
| STAGE3    | 7       | 0.035 0.029 | 3348 232 8 1511 79 7   | 3588 1597        | 1.78     | 0.1825421     | 1  | 1.97   | 0.71       | 5.44            |
| NHS2      | 7       | 0.040 0.030 | 1074 82 5 334 15 3     | 1161 352         | 0.91     | 0.3393545     | 1  | 1.99   | 0.47       | 8.36            |
| PBCS2     | 24      | 0.032 0.028 | 1648 112 1 669 40 0    | 1761 709         |          |               |    |        |            |                 |
| WHS       | 8       | 0.032 0.030 | 626 38 2 508 24 4      | 666 536          | 1.19     | 0.2754831     | 1  | 2.50   | 0.46       | 13.68           |
| PBCS 1+2  | 24      | 0.032 0.027 | 2121 145 1 1004 57 0   | 2267 1061        |          |               |    |        |            |                 |

| Locus      | Alleles | Chr    | Location    | Neighborhood    |          |               |    |        |            |                 |
|------------|---------|--------|-------------|-----------------|----------|---------------|----|--------|------------|-----------------|
| rs12622050 | G A     | 2q11.2 |             | 100945886 NPAS2 |          |               |    |        |            |                 |
| SUBSET     | Rank    | MAF    | Geno Counts | Subjects        | score X2 | score p-value | df | hom OR | hom OR 95% | hom OR 95% CI_u |

|          |    |             |                             |           |      |           |   |      |      |      |
|----------|----|-------------|-----------------------------|-----------|------|-----------|---|------|------|------|
| STAGE1-3 | 23 | 0.225 0.208 | 5470 3225 447 3307 1695 246 | 9142 5248 | 0.30 | 0.5858671 | 1 | 0.96 | 0.82 | 1.12 |
| NHS      | 13 | 0.220 0.189 | 694 392 55 529 251 27       | 1141 807  | 2.55 | 0.1103616 | 1 | 0.68 | 0.43 | 1.09 |
| STAGE1-2 | 22 | 0.220 0.200 | 3355 1980 239 2361 1141 162 | 5574 3664 | 0.10 | 0.757819  | 1 | 1.03 | 0.84 | 1.27 |
| STAGE2   | 20 | 0.221 0.203 | 2661 1588 184 1832 890 135  | 4433 2857 | 1.37 | 0.2417132 | 1 | 1.15 | 0.91 | 1.44 |
| CPSII    | 2  | 0.217 0.213 | 323 203 16 201 94 20        | 542 315   | 5.71 | 0.0168376 | 1 | 2.23 | 1.14 | 4.37 |
| PBCS1    | 8  | 0.244 0.249 | 284 197 25 204 121 27       | 506 352   | 2.72 | 0.099286  | 1 | 1.60 | 0.91 | 2.80 |
| PLCO     | 8  | 0.229 0.195 | 577 350 48 288 145 15       | 975 448   | 1.80 | 0.1798022 | 1 | 0.67 | 0.37 | 1.21 |
| WHI      | 22 | 0.213 0.194 | 1477 838 95 1139 530 73     | 2410 1742 | 0.16 | 0.6881903 | 1 | 1.07 | 0.78 | 1.46 |
| STAGE3   | 12 | 0.233 0.227 | 2116 1247 208 947 555 83    | 3571 1585 | 0.71 | 0.3984618 | 1 | 0.89 | 0.69 | 1.16 |
| NHS2     | 18 | 0.205 0.215 | 734 358 56 210 117 15       | 1148 342  | 0.14 | 0.7076832 | 1 | 0.89 | 0.50 | 1.60 |
| PBCS2    | 19 | 0.252 0.245 | 980 644 117 402 254 45      | 1741 701  | 0.07 | 0.7869553 | 1 | 0.95 | 0.67 | 1.36 |
| WHS      | 13 | 0.231 0.212 | 402 245 35 335 184 23       | 682 542   | 0.53 | 0.4674266 | 1 | 0.82 | 0.48 | 1.40 |
| PBCS 1+2 | 15 | 0.250 0.247 | 1263 839 142 605 374 73     | 2244 1052 | 0.44 | 0.5077198 | 1 | 1.10 | 0.82 | 1.48 |

Locus Alleles Chr Location Neighborhood  
rs7936636 C|T 11p11.2 44397546

| SUBSET   | Rank | MAF         | Geno Counts                 | Subjects  | score X2 | score p-value | df | hom OR | hom OR 95% | hom OR 95% CI_u |
|----------|------|-------------|-----------------------------|-----------|----------|---------------|----|--------|------------|-----------------|
| STAGE1-3 | 24   | 0.258 0.249 | 5016 3564 583 2989 1934 347 | 9163 5270 | 0.27     | 0.6011485     | 1  | 1.04   | 0.90       | 1.19            |
| NHS      | 18   | 0.256 0.247 | 634 430 77 470 276 61       | 1141 807  | 0.47     | 0.4922476     | 1  | 1.13   | 0.80       | 1.60            |
| STAGE1-2 | 23   | 0.263 0.245 | 3002 2205 365 2117 1303 246 | 5572 3666 | 0.09     | 0.7625246     | 1  | 1.03   | 0.87       | 1.21            |
| STAGE2   | 23   | 0.265 0.244 | 2368 1775 288 1647 1027 185 | 4431 2859 | 0.00     | 0.9610353     | 1  | 1.00   | 0.82       | 1.20            |
| CPSII    | 19   | 0.266 0.222 | 286 224 32 197 98 21        | 542 316   | 0.19     | 0.6634322     | 1  | 1.13   | 0.64       | 2.00            |
| PBCS1    | 19   | 0.247 0.229 | 284 193 28 212 119 21       | 505 352   | 0.07     | 0.7938092     | 1  | 1.08   | 0.60       | 1.94            |
| PLCO     | 15   | 0.263 0.253 | 526 385 64 254 161 33       | 975 448   | 0.31     | 0.5771869     | 1  | 1.13   | 0.73       | 1.75            |
| WHI      | 21   | 0.270 0.249 | 1272 973 164 984 649 110    | 2409 1743 | 0.41     | 0.5245079     | 1  | 0.92   | 0.72       | 1.18            |
| STAGE3   | 21   | 0.250 0.259 | 2014 1359 218 872 631 100   | 3591 1603 | 0.05     | 0.8160019     | 1  | 1.03   | 0.81       | 1.31            |
| NHS2     | 23   | 0.264 0.241 | 630 457 79 204 123 23       | 1166 350  | 0.02     | 0.8937776     | 1  | 0.97   | 0.60       | 1.56            |
| PBCS2    | 8    | 0.245 0.268 | 993 643 105 372 282 47      | 1741 701  | 0.39     | 0.5330353     | 1  | 1.12   | 0.78       | 1.60            |
| WHS      | 19   | 0.239 0.259 | 391 259 34 296 226 30       | 684 552   | 0.13     | 0.7143582     | 1  | 1.10   | 0.66       | 1.82            |
| PBCS 1+2 | 14   | 0.245 0.256 | 1277 836 133 584 401 69     | 2246 1054 | 0.49     | 0.4850899     | 1  | 1.11   | 0.82       | 1.50            |

**Supplementary Table 3. Results of Combined Analysis of Multi-stage Analysis of Breast Cancer with Stages 1, 2 and 3 for 24 SNPs for ER- Cases Only Compared to Controls**

**Data dictionary**

Locus – dbSNP ID  
 Alleles – SNP alleles, listed as major|minor  
 Chr – chromosomal mapping  
 Location – chromosomal location based on NCBI genome build 36.3  
 Neighborhood – known protein-coding gene(s) within the vicinity, if the SNP lies within 20kb 5' of the start of transcription of the gene and 10kb 3' of the last exon.  
 SUBSET – Analytic subset of the data  
 Rank – p value rank relative to the 24 SNPs within each study.  
 MAF – Minor allele frequency (controls|cases)  
 Geno counts – genotype counts for each observed genotype (Major homozygote controls|heterozygote controls|minor homozygote controls/ Major homozygote cases|heterozygote cases|minor homozygote cases)  
 Subjects – number of subjects (controls|cases)  
 Score X2 – X<sup>2</sup> statistic for association by a Score test  
 Score p-value – significance level for X<sup>2</sup> statistic  
 df – degrees of freedom of X<sup>2</sup> statistic  
 het OR – Odds ratio for the heterozygote genotype (not included for recessive models)  
 het OR 95% CI\_l – lower bound of the 95% confidence interval of the Odds ratio  
 het OR 95% CI\_u – upper bound of the 95% confidence interval of the Odds ratio

**Supplementary Table results:**

adj\_geno – covariate adjusted, genotype-specific effect model  
 adj\_trend – covariate adjusted, trend effect model  
 adj\_rec – covariate adjusted, recessive effect model  
 unadj\_geno – unadjusted, genotype-specific effect model  
 unadj\_trend – unadjusted, trend effect model  
 unadj\_rec – unadjusted, recessive effect model

**adj\_geno**

| Locus     | Alleles | Chr         | Location                   | Neighborhood     |          |               |    |        |               |               |        |               |                 |                 |  |
|-----------|---------|-------------|----------------------------|------------------|----------|---------------|----|--------|---------------|---------------|--------|---------------|-----------------|-----------------|--|
| rs2303659 | G A     | 11q24.3     |                            | 129326474 PRDM10 |          |               |    |        |               |               |        |               |                 |                 |  |
| SUBSET    | Rank    | MAF         | Geno Counts                | Subjects         | score X2 | score p-value | df | het OR | het OR 95% CI | het OR 95% CI | hom OR | hom OR 95% CI | hom OR 95% CI   | hom OR 95% CI_u |  |
| STAGE1-3  | 1       | 0.034 0.024 | 8222 583 10 1229 59 2      | 8815 1290        | 8.54     | 0.013995      | 2  | 0.67   | 0.51          | 0.89          | 1.73   | 0.37          | 8.08            |                 |  |
| NHS       | 22      | 0.034 0.022 | 1063 78 0 175 8 0          | 1141 183         |          |               |    |        |               |               |        |               |                 |                 |  |
| STAGE1-2  | 23      | 0.034 0.022 | 4926 356 2 733 34 0        | 5284 767         |          |               |    |        |               |               |        |               |                 |                 |  |
| STAGE2    | 23      | 0.034 0.022 | 3863 278 2 558 26 0        | 4143 584         |          |               |    |        |               |               |        |               |                 |                 |  |
| PBCS1     | 22      | 0.033 0.021 | 473 33 0 181 8 0           | 506 189          |          |               |    |        |               |               |        |               |                 |                 |  |
| PLCO      | 24      | 0.036 0.020 | 906 68 1 71 3 0            | 975 74           |          |               |    |        |               |               |        |               |                 |                 |  |
| WHI       | 24      | 0.034 0.025 | 2245 163 1 280 15 0        | 2409 295         |          |               |    |        |               |               |        |               |                 |                 |  |
| STAGE3    | 3       | 0.034 0.028 | 3296 227 8 496 25 2        | 3531 523         | 3.26     | 0.196394      | 2  | 0.73   | 0.47          | 1.11          | 2.22   | 0.46          | 10.74           |                 |  |
| NHS2      | 24      | 0.039 0.000 | 1029 77 5 84 0 0           | 1111 84          |          |               |    |        |               |               |        |               |                 |                 |  |
| PBCS2     | 11      | 0.032 0.033 | 1648 112 1 322 21 1        | 1761 344         | 1.65     | 0.4390201     | 2  | 0.96   | 0.59          | 1.56          | 5.05   | 0.31          | 81.27           |                 |  |
| WHS       | 11      | 0.032 0.032 | 619 38 2 90 4 1            | 659 95           | 2.58     | 0.2751139     | 2  | 0.60   | 0.21          | 1.77          | 4.39   | 0.38          | 50.34           |                 |  |
| PBCS 1+2  | 5       | 0.032 0.029 | 2121 145 1 503 29 1        | 2267 533         | 2.36     | 0.3066345     | 2  | 0.84   | 0.55          | 1.27          | 5.07   | 0.32          | 81.51           |                 |  |
| Locus     | Alleles | Chr         | Location                   | Neighborhood     |          |               |    |        |               |               |        |               |                 |                 |  |
| rs2391406 | T G     | 13q33.3     |                            | 106586873        |          |               |    |        |               |               |        |               |                 |                 |  |
| SUBSET    | Rank    | MAF         | Geno Counts                | Subjects         | score X2 | score p-value | df | het OR | het OR 95% CI | het OR 95% CI | hom OR | hom OR 95% CI | hom OR 95% CI_u |                 |  |
| STAGE1-3  | 2       | 0.372 0.360 | 3513 4015 1265/511 627 150 | 8793 1288        | 8.19     | 0.0166206     | 2  | 1.06   | 0.93          | 1.20          | 0.80   | 0.66          | 0.97            |                 |  |
| NHS       | 16      | 0.371 0.358 | 452 529 159/72 91 20       | 1140 183         | 1.63     | 0.4423565     | 2  | 1.10   | 0.79          | 1.55          | 0.79   | 0.47          | 1.34            |                 |  |
| STAGE1-2  | 3       | 0.375 0.354 | 2110 2378 788/308 373 85   | 5276 766         | 9.39     | 0.0091241     | 2  | 1.08   | 0.92          | 1.27          | 0.73   | 0.56          | 0.94            |                 |  |
| STAGE2    | 4       | 0.376 0.353 | 1658 1849 629/236 282 65   | 4136 583         | 8.05     | 0.0178778     | 2  | 1.07   | 0.89          | 1.29          | 0.71   | 0.53          | 0.95            |                 |  |

|          |    |             |                          |          |      |           |   |      |      |      |      |      |      |
|----------|----|-------------|--------------------------|----------|------|-----------|---|------|------|------|------|------|------|
| PBCS1    | 17 | 0.387 0.362 | 195 230 81 78 84 26      | 506 188  | 0.48 | 0.7848846 | 2 | 0.90 | 0.62 | 1.31 | 0.85 | 0.50 | 1.43 |
| PLCO     | 5  | 0.376 0.345 | 398 416 157 29 39 6      | 971 74   | 4.33 | 0.1149279 | 2 | 1.29 | 0.78 | 2.15 | 0.53 | 0.21 | 1.32 |
| WHI      | 9  | 0.372 0.344 | 971 1084 353 123 141 31  | 2408 295 | 4.07 | 0.1305677 | 2 | 1.03 | 0.80 | 1.34 | 0.68 | 0.45 | 1.04 |
| STAGE3   | 20 | 0.369 0.368 | 1403 1641 477 203 253 65 | 3521 521 | 0.58 | 0.7478914 | 2 | 1.02 | 0.83 | 1.24 | 0.91 | 0.67 | 1.23 |
| NHS2     | 15 | 0.341 0.359 | 493 477 140 34 41 10     | 1110 85  | 0.76 | 0.6823945 | 2 | 1.22 | 0.76 | 1.96 | 1.00 | 0.48 | 2.09 |
| PBCS2    | 23 | 0.380 0.382 | 656 853 236 126 171 45   | 1745 342 | 0.12 | 0.9434812 | 2 | 1.04 | 0.81 | 1.34 | 0.99 | 0.69 | 1.44 |
| WHS      | 8  | 0.385 0.324 | 254 311 101 43 41 10     | 666 94   | 3.36 | 0.1862371 | 2 | 0.75 | 0.47 | 1.20 | 0.53 | 0.26 | 1.11 |
| PBCS 1+2 | 20 | 0.381 0.375 | 851 1079 317 204 256 71  | 2247 531 | 0.26 | 0.8775225 | 2 | 1.01 | 0.82 | 1.24 | 0.94 | 0.69 | 1.27 |

Locus Alleles Chr Location Neighborhood  
rs17570439 T|C 1p34.2 40096797 TRIT1

| SUBSET   | Rank | MAF         | Geno Counts              | Subjects  | score X2 | score p-value | df | het OR | het OR 95% CI | het OR 95% CI | hom OR | hom OR 95% CI | hom OR 95% CI_u |
|----------|------|-------------|--------------------------|-----------|----------|---------------|----|--------|---------------|---------------|--------|---------------|-----------------|
| STAGE1-3 | 3    | 0.208 0.231 | 5507 2905 379 759 465 65 | 8791 1289 | 7.59     | 0.0225359     | 2  | 1.16   | 1.03          | 1.32          | 1.29   | 0.98          | 1.71            |
| NHS      | 8    | 0.204 0.238 | 718 381 42 107 65 11     | 1141 183  | 3.52     | 0.1719425     | 2  | 1.18   | 0.84          | 1.65          | 1.86   | 0.92          | 3.76            |
| STAGE1-2 | 11   | 0.208 0.233 | 3285 1798 201 446 283 37 | 5284 766  | 5.62     | 0.0600645     | 2  | 1.16   | 0.98          | 1.36          | 1.42   | 0.98          | 2.06            |
| STAGE2   | 13   | 0.209 0.232 | 2567 1417 159 339 218 26 | 4143 583  | 3.00     | 0.2230238     | 2  | 1.15   | 0.96          | 1.39          | 1.29   | 0.83          | 2.01            |
| PBCS1    | 16   | 0.210 0.214 | 310 179 17 113 71 5      | 506 189   | 0.66     | 0.7200068     | 2  | 1.03   | 0.72          | 1.48          | 0.67   | 0.23          | 1.91            |
| PLCO     | 8    | 0.220 0.243 | 599 323 53 40 32 2       | 975 74    | 3.61     | 0.1646956     | 2  | 1.46   | 0.90          | 2.39          | 0.54   | 0.12          | 2.31            |
| WHI      | 6    | 0.206 0.238 | 1501 825 83 171 106 17   | 2409 294  | 4.77     | 0.092217      | 2  | 1.13   | 0.88          | 1.47          | 1.79   | 1.03          | 3.09            |
| STAGE3   | 4    | 0.209 0.228 | 2222 1108 178 313 182 28 | 3508 523  | 2.19     | 0.3352836     | 2  | 1.16   | 0.95          | 1.41          | 1.13   | 0.74          | 1.72            |
| NHS2     | 18   | 0.208 0.235 | 694 332 60 51 28 6       | 1086 85   | 0.48     | 0.788286      | 2  | 1.13   | 0.70          | 1.83          | 1.29   | 0.53          | 3.15            |
| PBCS2    | 16   | 0.208 0.215 | 1111 557 86 211 115 16   | 1754 342  | 0.48     | 0.7873483     | 2  | 1.09   | 0.85          | 1.39          | 0.97   | 0.56          | 1.68            |
| WHS      | 10   | 0.212 0.266 | 417 219 32 51 39 6       | 668 96    | 2.65     | 0.2660175     | 2  | 1.43   | 0.91          | 2.25          | 1.48   | 0.58          | 3.75            |
| PBCS 1+2 | 13   | 0.208 0.215 | 1421 735 103 324 186 21  | 2259 531  | 0.82     | 0.6635689     | 2  | 1.08   | 0.88          | 1.33          | 0.92   | 0.56          | 1.50            |

Locus Alleles Chr Location Neighborhood  
rs3134615 G|T 1p34.2 40134653 TRIT1,MYCL1

| SUBSET   | Rank | MAF         | Geno Counts              | Subjects  | score X2 | score p-value | df | het OR | het OR 95% CI | het OR 95% CI | hom OR | hom OR 95% CI | hom OR 95% CI_u |
|----------|------|-------------|--------------------------|-----------|----------|---------------|----|--------|---------------|---------------|--------|---------------|-----------------|
| STAGE1-3 | 4    | 0.227 0.250 | 5293 3091 463 722 489 77 | 8847 1288 | 7.47     | 0.0238664     | 2  | 1.16   | 1.02          | 1.31          | 1.28   | 0.99          | 1.65            |
| NHS      | 5    | 0.220 0.260 | 689 402 50 101 69 13     | 1141 183  | 4.52     | 0.104505      | 2  | 1.22   | 0.87          | 1.70          | 1.93   | 1.00          | 3.70            |
| STAGE1-2 | 5    | 0.228 0.256 | 3133 1895 256 420 302 45 | 5284 767  | 6.59     | 0.0371477     | 2  | 1.19   | 1.01          | 1.40          | 1.38   | 0.98          | 1.94            |
| STAGE2   | 11   | 0.230 0.254 | 2444 1493 206 319 233 32 | 4143 584  | 3.64     | 0.1623625     | 2  | 1.18   | 0.98          | 1.42          | 1.23   | 0.83          | 1.84            |
| PBCS1    | 11   | 0.226 0.235 | 299 185 22 106 77 6      | 506 189   | 1.43     | 0.4889328     | 2  | 1.13   | 0.79          | 1.60          | 0.65   | 0.25          | 1.69            |
| PLCO     | 9    | 0.236 0.264 | 578 334 63 38 33 3       | 975 74    | 3.26     | 0.1963507     | 2  | 1.46   | 0.89          | 2.39          | 0.66   | 0.20          | 2.24            |
| WHI      | 7    | 0.229 0.264 | 1421 875 113 160 114 21  | 2409 295  | 4.30     | 0.1163665     | 2  | 1.16   | 0.90          | 1.50          | 1.63   | 0.99          | 2.67            |
| STAGE3   | 15   | 0.226 0.241 | 2160 1196 207 302 188 32 | 3563 522  | 1.27     | 0.5296789     | 2  | 1.11   | 0.91          | 1.35          | 1.13   | 0.76          | 1.68            |
| NHS2     | 14   | 0.228 0.229 | 687 372 72 52 24 7       | 1131 83   | 0.98     | 0.6140392     | 2  | 0.83   | 0.50          | 1.38          | 1.25   | 0.55          | 2.86            |
| PBCS2    | 14   | 0.226 0.230 | 1063 591 102 202 124 17  | 1756 343  | 1.06     | 0.5880079     | 2  | 1.10   | 0.86          | 1.41          | 1.07   | 0.87          | 1.49            |
| WHS      | 4    | 0.221 0.292 | 410 233 33 48 40 8       | 676 96    | 4.12     | 0.1275644     | 2  | 1.45   | 0.92          | 2.28          | 1.97   | 0.85          | 4.56            |
| PBCS 1+2 | 6    | 0.226 0.232 | 1362 776 124 308 200 23  | 2262 531  | 2.09     | 0.351493      | 2  | 1.12   | 0.92          | 1.37          | 0.84   | 0.53          | 1.34            |

Locus Alleles Chr Location Neighborhood  
rs998592 G|A 16p13.13 11107179 CLEC16A

| SUBSET   | Rank | MAF         | Geno Counts                | Subjects  | score X2 | score p-value | df | het OR | het OR 95% CI | het OR 95% CI | hom OR | hom OR 95% CI | hom OR 95% CI_u |
|----------|------|-------------|----------------------------|-----------|----------|---------------|----|--------|---------------|---------------|--------|---------------|-----------------|
| STAGE1-3 | 5    | 0.425 0.404 | 2956 4239 1625 446 647 199 | 8820 1292 | 6.30     | 0.0428016     | 2  | 1.04   | 0.91          | 1.19          | 0.84   | 0.70          | 1.00            |
| NHS      | 4    | 0.424 0.434 | 405 502 232 54 99 30       | 1139 183  | 5.73     | 0.0570108     | 2  | 1.46   | 1.02          | 2.09          | 0.99   | 0.61          | 1.59            |
| STAGE1-2 | 2    | 0.436 0.403 | 1716 2524 1042 264 388 115 | 5282 767  | 9.65     | 0.0080141     | 2  | 1.05   | 0.88          | 1.24          | 0.74   | 0.58          | 0.93            |
| STAGE2   | 3    | 0.440 0.393 | 1311 2022 810 210 289 85   | 4143 584  | 8.59     | 0.0136357     | 2  | 0.94   | 0.77          | 1.15          | 0.67   | 0.51          | 0.89            |
| PBCS1    | 4    | 0.415 0.368 | 186 220 100 74 91 24       | 506 189   | 4.54     | 0.1030946     | 2  | 1.09   | 0.75          | 1.59          | 0.63   | 0.37          | 1.07            |
| PLCO     | 19   | 0.419 0.426 | 324 485 166 25 35 14       | 975 74    | 0.41     | 0.8165405     | 2  | 0.95   | 0.56          | 1.64          | 1.18   | 0.59          | 2.35            |
| WHI      | 3    | 0.450 0.403 | 729 1192 488 100 152 43    | 2409 295  | 5.97     | 0.0505853     | 2  | 0.92   | 0.70          | 1.21          | 0.63   | 0.43          | 0.92            |
| STAGE3   | 21   | 0.407 0.407 | 1240 1715 584 182 260 84   | 3539 526  | 0.17     | 0.9193846     | 2  | 1.04   | 0.85          | 1.28          | 1.01   | 0.76          | 1.33            |
| NHS2     | 7    | 0.417 0.482 | 378 542 193 22 43 19       | 1113 84   | 3.15     | 0.2068008     | 2  | 1.37   | 0.81          | 2.34          | 1.77   | 0.93          | 3.36            |
| PBCS2    | 21   | 0.400 0.397 | 625 849 274 122 171 51     | 1748 344  | 0.26     | 0.8770932     | 2  | 1.03   | 0.80          | 1.33          | 0.94   | 0.66          | 1.35            |

|          |    |             |                         |          |      |           |   |      |      |      |      |      |      |
|----------|----|-------------|-------------------------|----------|------|-----------|---|------|------|------|------|------|------|
| WHS      | 21 | 0.412 0.378 | 237 324 117 38 46 14    | 678 98   | 0.41 | 0.8151814 | 2 | 0.91 | 0.57 | 1.45 | 0.81 | 0.42 | 1.57 |
| PBCS 1+2 | 3  | 0.403 0.386 | 811 1069 373 196 261 75 | 2253 532 | 2.43 | 0.2974067 | 2 | 1.04 | 0.84 | 1.28 | 0.83 | 0.62 | 1.11 |

Locus rs7936636 Alleles C|T Chr 11p11.2 Location Neighborhood 44397546

| SUBSET   | Rank | MAF         | Geno Counts              | Subjects  | score X2 | score p-value | df | het OR | het OR 95% CI | het OR 95% CI | hom OR | hom OR 95% CI | hom OR 95% CI_u |
|----------|------|-------------|--------------------------|-----------|----------|---------------|----|--------|---------------|---------------|--------|---------------|-----------------|
| STAGE1-3 | 6    | 0.258 0.234 | 4826 3425 560 759 457 74 | 8811 1290 | 6.01     | 0.0495141     | 2  | 0.86   | 0.76          | 0.98          | 0.85   | 0.66          | 1.11            |
| NHS      | 10   | 0.256 0.219 | 634 430 77 110 66 7      | 1141 183  | 2.68     | 0.2612242     | 2  | 0.89   | 0.64          | 1.24          | 0.53   | 0.24          | 1.18            |
| STAGE1-2 | 1    | 0.263 0.226 | 2851 2086 344 465 258 44 | 5281 767  | 10.74    | 0.0046652     | 2  | 0.76   | 0.65          | 0.90          | 0.80   | 0.58          | 1.13            |
| STAGE2   | 1    | 0.264 0.228 | 2217 1656 267 355 192 37 | 4140 584  | 10.86    | 0.0043817     | 2  | 0.73   | 0.60          | 0.88          | 0.90   | 0.62          | 1.30            |
| PBCS1    | 6    | 0.247 0.228 | 284 193 28 115 62 12     | 505 189   | 2.06     | 0.356887      | 2  | 0.77   | 0.54          | 1.11          | 1.04   | 0.50          | 2.15            |
| PLCO     | 7    | 0.263 0.243 | 526 385 64 45 22 7       | 975 74    | 3.76     | 0.1525864     | 2  | 0.65   | 0.38          | 1.11          | 1.35   | 0.57          | 3.17            |
| WHI      | 2    | 0.270 0.219 | 1272 973 163 181 99 15   | 2408 295  | 8.04     | 0.0179671     | 2  | 0.71   | 0.55          | 0.92          | 0.65   | 0.38          | 1.13            |
| STAGE3   | 23   | 0.251 0.248 | 1975 1339 216 294 199 30 | 3530 523  | 0.11     | 0.9456688     | 2  | 1.02   | 0.84          | 1.24          | 0.95   | 0.63          | 1.42            |
| NHS2     | 16   | 0.266 0.244 | 598 438 77 47 33 4       | 1113 84   | 0.71     | 0.7002809     | 2  | 0.96   | 0.60          | 1.52          | 0.64   | 0.22          | 1.83            |
| PBCS2    | 13   | 0.245 0.265 | 993 643 105 185 133 24   | 1741 342  | 1.06     | 0.5873326     | 2  | 1.11   | 0.87          | 1.41          | 1.21   | 0.76          | 1.95            |
| WHS      | 9    | 0.241 0.191 | 384 258 34 62 33 2       | 676 97    | 2.81     | 0.2455655     | 2  | 0.80   | 0.51          | 1.27          | 0.35   | 0.08          | 1.49            |
| PBCS 1+2 | 18   | 0.245 0.251 | 1277 836 133 300 195 36  | 2246 531  | 0.46     | 0.7932746     | 2  | 0.98   | 0.80          | 1.21          | 1.13   | 0.76          | 1.68            |

Locus rs10850145 Alleles C|T Chr 12q24.13 Location Neighborhood 112428512

| SUBSET   | Rank | MAF         | Geno Counts              | Subjects  | score X2 | score p-value | df | het OR | het OR 95% CI | het OR 95% CI | hom OR | hom OR 95% CI | hom OR 95% CI_u |
|----------|------|-------------|--------------------------|-----------|----------|---------------|----|--------|---------------|---------------|--------|---------------|-----------------|
| STAGE1-3 | 7    | 0.094 0.108 | 7261 1521 74 1029 245 17 | 8856 1291 | 5.71     | 0.0575844     | 2  | 1.14   | 0.98          | 1.33          | 1.64   | 0.95          | 2.83            |
| NHS      | 1    | 0.085 0.117 | 951 185 5 145 33 5       | 1141 183  | 10.40    | 0.0055123     | 2  | 1.23   | 0.82          | 1.87          | 6.15   | 1.71          | 22.09           |
| STAGE1-2 | 10   | 0.089 0.108 | 4388 849 47 612 144 11   | 5284 767  | 5.87     | 0.0531975     | 2  | 1.21   | 0.99          | 1.48          | 1.71   | 0.87          | 3.37            |
| STAGE2   | 15   | 0.090 0.105 | 3437 664 42 467 111 6    | 4143 584  | 2.51     | 0.2857122     | 2  | 1.20   | 0.96          | 1.52          | 1.05   | 0.44          | 2.53            |
| PBCS1    | 14   | 0.094 0.101 | 417 83 6 152 36 1        | 506 189   | 0.90     | 0.6387553     | 2  | 1.18   | 0.76          | 1.83          | 0.54   | 0.06          | 4.59            |
| PLCO     | 22   | 0.077 0.122 | 832 135 8 56 18 0        | 975 74    |          |               |    |        |               |               |        |               |                 |
| WHI      | 19   | 0.094 0.107 | 1982 403 24 236 55 4     | 2409 295  | 0.82     | 0.6620569     | 2  | 1.14   | 0.83          | 1.56          | 1.32   | 0.45          | 3.90            |
| STAGE3   | 14   | 0.102 0.108 | 2873 673 27 417 101 6    | 3573 524  | 1.50     | 0.4734328     | 2  | 1.04   | 0.82          | 1.32          | 1.73   | 0.70          | 4.28            |
| NHS2     | 1    | 0.103 0.137 | 905 207 12 65 15 4       | 1124 84   | 7.27     | 0.0264493     | 2  | 1.01   | 0.56          | 1.81          | 4.38   | 1.36          | 14.13           |
| PBCS2    | 19   | 0.104 0.105 | 1412 338 15 273 68 2     | 1765 343  | 0.34     | 0.8453081     | 2  | 1.06   | 0.79          | 1.41          | 0.72   | 0.16          | 3.17            |
| WHS      | 24   | 0.094 0.093 | 556 128 0 79 18 0        | 684 97    |          |               |    |        |               |               |        |               |                 |
| PBCS 1+2 | 8    | 0.102 0.103 | 1829 420 21 425 104 3    | 2270 532  | 1.42     | 0.4905684     | 2  | 1.11   | 0.87          | 1.41          | 0.60   | 0.18          | 2.04            |

Locus rs17740709 Alleles A|G Chr 12q21.31 Location Neighborhood 81947471 TMTC2

| SUBSET   | Rank | MAF         | Geno Counts              | Subjects  | score X2 | score p-value | df | het OR | het OR 95% CI | het OR 95% CI | hom OR | hom OR 95% CI | hom OR 95% CI_u |
|----------|------|-------------|--------------------------|-----------|----------|---------------|----|--------|---------------|---------------|--------|---------------|-----------------|
| STAGE1-3 | 8    | 0.219 0.210 | 5354 3028 417 811 412 65 | 8799 1288 | 4.91     | 0.0858372     | 2  | 0.87   | 0.76          | 0.98          | 0.98   | 0.74          | 1.29            |
| NHS      | 11   | 0.218 0.180 | 691 402 48 121 58 4      | 1141 183  | 2.67     | 0.2631997     | 2  | 0.83   | 0.59          | 1.17          | 0.50   | 0.17          | 1.41            |
| STAGE1-2 | 6    | 0.218 0.213 | 3200 1869 215 481 246 40 | 5284 767  | 6.55     | 0.0377668     | 2  | 0.84   | 0.71          | 0.99          | 1.22   | 0.85          | 1.75            |
| STAGE2   | 2    | 0.217 0.223 | 2509 1467 167 360 188 36 | 4143 584  | 8.62     | 0.0134652     | 2  | 0.84   | 0.69          | 1.02          | 1.47   | 1.00          | 2.17            |
| PBCS1    | 7    | 0.242 0.254 | 282 203 21 106 70 13     | 506 189   | 1.91     | 0.3839873     | 2  | 0.94   | 0.66          | 1.35          | 1.61   | 0.77          | 3.37            |
| PLCO     | 13   | 0.214 0.209 | 603 326 46 48 21 5       | 975 74    | 1.24     | 0.5367209     | 2  | 0.79   | 0.46          | 1.35          | 1.33   | 0.49          | 3.60            |
| WHI      | 8    | 0.215 0.212 | 1466 851 92 187 91 17    | 2409 295  | 4.09     | 0.1290817     | 2  | 0.83   | 0.64          | 1.08          | 1.40   | 0.81          | 2.41            |
| STAGE3   | 8    | 0.222 0.207 | 2154 1160 202 330 166 25 | 3516 521  | 1.84     | 0.3994345     | 2  | 0.92   | 0.75          | 1.13          | 0.77   | 0.50          | 1.18            |
| NHS2     | 17   | 0.210 0.204 | 694 349 56 53 23 5       | 1099 81   | 0.64     | 0.7247247     | 2  | 0.85   | 0.51          | 1.42          | 1.23   | 0.47          | 3.21            |
| PBCS2    | 12   | 0.234 0.212 | 1042 597 112 215 109 18  | 1751 342  | 1.43     | 0.4881079     | 2  | 0.89   | 0.70          | 1.15          | 0.78   | 0.46          | 1.31            |
| WHS      | 12   | 0.212 0.194 | 418 214 34 62 34 2       | 666 98    | 2.45     | 0.2938574     | 2  | 1.06   | 0.67          | 1.67          | 0.34   | 0.08          | 1.47            |
| PBCS 1+2 | 10   | 0.236 0.227 | 1324 799 133 321 179 31  | 2256 531  | 1.22     | 0.5443172     | 2  | 0.89   | 0.73          | 1.09          | 0.95   | 0.63          | 1.43            |

Locus rs999737 Alleles C|T Chr 14q24.1 Location Neighborhood 68104435 RAD51L1

| SUBSET   | Rank | MAF         | Geno Counts              | Subjects  | score X2 | score p-value | df | het OR | het OR 95% CI | het OR 95% CI | hom OR | hom OR 95% CI | hom OR 95% CI_u |
|----------|------|-------------|--------------------------|-----------|----------|---------------|----|--------|---------------|---------------|--------|---------------|-----------------|
| STAGE1-3 | 9    | 0.238 0.228 | 5166 3096 548 760 466 61 | 8810 1287 | 3.88     | 0.1433545     | 2  | 1.01   | 0.89          | 1.14          | 0.76   | 0.58          | 1.01            |
| NHS      | 19   | 0.244 0.239 | 660 405 76 105 67 10     | 1141 182  | 0.49     | 0.7842518     | 2  | 1.03   | 0.74          | 1.44          | 0.80   | 0.40          | 1.61            |
| STAGE1-2 | 15   | 0.239 0.224 | 3092 1862 330 459 271 36 | 5284 766  | 3.08     | 0.2145374     | 2  | 0.96   | 0.82          | 1.14          | 0.72   | 0.50          | 1.04            |
| STAGE2   | 14   | 0.237 0.219 | 2432 1457 254 354 204 26 | 4143 584  | 2.90     | 0.2347573     | 2  | 0.95   | 0.78          | 1.14          | 0.70   | 0.45          | 1.07            |
| PBCS1    | 13   | 0.242 0.228 | 291 185 30 115 62 12     | 506 189   | 1.09     | 0.578606      | 2  | 0.83   | 0.57          | 1.19          | 1.00   | 0.49          | 2.04            |
| PLCO     | 11   | 0.238 0.189 | 576 334 65 48 24 2       | 975 74    | 2.11     | 0.3484817     | 2  | 0.84   | 0.50          | 1.41          | 0.38   | 0.09          | 1.62            |
| WHI      | 14   | 0.235 0.224 | 1416 854 139 174 110 11  | 2409 295  | 2.15     | 0.3419965     | 2  | 1.06   | 0.82          | 1.36          | 0.65   | 0.35          | 1.24            |
| STAGE3   | 13   | 0.237 0.235 | 2075 1237 218 302 195 25 | 3530 522  | 1.52     | 0.4667166     | 2  | 1.06   | 0.87          | 1.28          | 0.80   | 0.52          | 1.24            |
| NHS2     | 11   | 0.234 0.212 | 664 362 77 52 30 3       | 1103 85   | 1.50     | 0.4727482     | 2  | 1.06   | 0.66          | 1.70          | 0.50   | 0.15          | 1.66            |
| PBCS2    | 24   | 0.236 0.234 | 1016 637 94 198 125 17   | 1747 340  | 0.10     | 0.9505529     | 2  | 1.00   | 0.79          | 1.28          | 0.92   | 0.54          | 1.58            |
| WHS      | 13   | 0.244 0.258 | 395 238 47 52 40 5       | 680 97    | 1.81     | 0.4043374     | 2  | 1.29   | 0.82          | 2.02          | 0.77   | 0.29          | 2.06            |
| PBCS 1+2 | 23   | 0.237 0.232 | 1306 819 124 312 187 29  | 2249 528  | 0.21     | 0.8982928     | 2  | 0.95   | 0.78          | 1.17          | 0.97   | 0.63          | 1.49            |

Locus Alleles Chr Location Neighborhood  
rs1274466 T|C 10p11.21 34510210 PARD3

| SUBSET   | Rank | MAF         | Geno Counts                | Subjects  | score X2 | score p-value | df | het OR | het OR 95% CI | het OR 95% CI | hom OR | hom OR 95% CI | hom OR 95% CI_u |
|----------|------|-------------|----------------------------|-----------|----------|---------------|----|--------|---------------|---------------|--------|---------------|-----------------|
| STAGE1-3 | 10   | 0.451 0.437 | 2683 4344 1810 399 650 238 | 8837 1287 | 3.30     | 0.1918538     | 2  | 1.01   | 0.88          | 1.15          | 0.87   | 0.73          | 1.04            |
| NHS      | 13   | 0.470 0.432 | 312 585 244 55 98 30       | 1141 183  | 2.13     | 0.3450513     | 2  | 0.96   | 0.67          | 1.37          | 0.72   | 0.44          | 1.16            |
| STAGE1-2 | 4    | 0.454 0.428 | 1574 2618 1092 239 399 129 | 5284 767  | 6.81     | 0.0332152     | 2  | 1.00   | 0.84          | 1.20          | 0.76   | 0.61          | 0.96            |
| STAGE2   | 8    | 0.450 0.427 | 1262 2033 848 184 301 99   | 4143 584  | 4.81     | 0.0904374     | 2  | 1.02   | 0.83          | 1.25          | 0.78   | 0.60          | 1.02            |
| PBCS1    | 5    | 0.483 0.439 | 138 247 121 57 98 34       | 506 189   | 2.37     | 0.3061717     | 2  | 0.99   | 0.67          | 1.48          | 0.71   | 0.43          | 1.17            |
| PLCO     | 21   | 0.449 0.453 | 298 478 199 22 37 15       | 975 74    | 0.04     | 0.9802614     | 2  | 1.06   | 0.61          | 1.84          | 1.03   | 0.52          | 2.06            |
| WHI      | 10   | 0.443 0.408 | 755 1175 479 99 151 45     | 2409 295  | 3.29     | 0.1934871     | 2  | 0.98   | 0.75          | 1.29          | 0.73   | 0.50          | 1.06            |
| STAGE3   | 24   | 0.445 0.450 | 1109 1730 719 161 251 109  | 3558 521  | 0.11     | 0.9469243     | 2  | 1.00   | 0.80          | 1.23          | 1.04   | 0.80          | 1.35            |
| NHS2     | 3    | 0.440 0.506 | 363 535 227 19 46 20       | 1125 85   | 3.85     | 0.145902      | 2  | 1.69   | 0.97          | 2.94          | 1.68   | 0.88          | 3.22            |
| PBCS2    | 7    | 0.457 0.432 | 518 863 368 115 156 69     | 1749 340  | 2.36     | 0.3071296     | 2  | 0.82   | 0.63          | 1.06          | 0.85   | 0.61          | 1.18            |
| WHS      | 16   | 0.424 0.464 | 228 332 124 27 49 20       | 684 96    | 1.13     | 0.5688271     | 2  | 1.30   | 0.78          | 2.15          | 1.29   | 0.68          | 2.43            |
| PBCS 1+2 | 2    | 0.463 0.436 | 656 1106 488 171 254 103   | 2250 528  | 3.01     | 0.2215092     | 2  | 0.87   | 0.70          | 1.08          | 0.79   | 0.60          | 1.04            |

Locus Alleles Chr Location Neighborhood  
rs12608723 A|G 19q13.11 38508973

| SUBSET   | Rank | MAF         | Geno Counts              | Subjects  | score X2 | score p-value | df | het OR | het OR 95% CI | het OR 95% CI | hom OR | hom OR 95% CI | hom OR 95% CI_u |
|----------|------|-------------|--------------------------|-----------|----------|---------------|----|--------|---------------|---------------|--------|---------------|-----------------|
| STAGE1-3 | 11   | 0.136 0.132 | 6618 2036 188 984 274 33 | 8842 1291 | 3.22     | 0.199711      | 2  | 0.90   | 0.78          | 1.04          | 1.20   | 0.82          | 1.76            |
| NHS      | 7    | 0.153 0.156 | 818 296 27 127 55 1      | 1141 183  | 3.57     | 0.1674869     | 2  | 1.19   | 0.84          | 1.68          | 0.23   | 0.03          | 1.74            |
| STAGE1-2 | 19   | 0.143 0.143 | 3887 1281 116 569 176 22 | 5284 767  | 2.20     | 0.3328455     | 2  | 0.92   | 0.77          | 1.11          | 1.31   | 0.82          | 2.11            |
| STAGE2   | 6    | 0.140 0.140 | 3069 985 89 442 121 21   | 4143 584  | 7.45     | 0.0240718     | 2  | 0.84   | 0.67          | 1.04          | 1.69   | 1.02          | 2.78            |
| PBCS1    | 19   | 0.153 0.135 | 364 129 13 142 43 4      | 506 189   | 0.35     | 0.8396533     | 2  | 0.90   | 0.60          | 1.34          | 0.83   | 0.26          | 2.63            |
| PLCO     | 1    | 0.132 0.162 | 738 216 21 57 10 7       | 975 74    | 14.48    | 0.000717      | 2  | 0.57   | 0.28          | 1.14          | 4.07   | 1.61          | 10.29           |
| WHI      | 20   | 0.141 0.137 | 1783 572 54 222 65 8     | 2409 295  | 0.62     | 0.7319482     | 2  | 0.92   | 0.68          | 1.23          | 1.20   | 0.56          | 2.57            |
| STAGE3   | 11   | 0.127 0.115 | 2733 758 72 415 99 11    | 3563 525  | 1.66     | 0.435133      | 2  | 0.86   | 0.68          | 1.09          | 1.05   | 0.55          | 2.00            |
| NHS2     | 8    | 0.126 0.138 | 869 243 21 67 16 4       | 1133 87   | 2.87     | 0.2384345     | 2  | 0.87   | 0.49          | 1.53          | 2.35   | 0.78          | 7.09            |
| PBCS2    | 5    | 0.124 0.102 | 1344 368 32 276 62 4     | 1744 342  | 2.50     | 0.2871595     | 2  | 0.81   | 0.60          | 1.10          | 0.63   | 0.22          | 1.79            |
| WHS      | 23   | 0.135 0.141 | 520 147 19 72 21 3       | 686 96    | 0.11     | 0.9446064     | 2  | 1.09   | 0.64          | 1.84          | 1.12   | 0.32          | 3.95            |
| PBCS 1+2 | 1    | 0.130 0.113 | 1706 494 45 418 104 8    | 2245 530  | 3.04     | 0.2188561     | 2  | 0.83   | 0.66          | 1.06          | 0.68   | 0.32          | 1.46            |

Locus Alleles Chr Location Neighborhood  
rs11077820 T|C 17q25.1 71966263 UBE2O, AANAT

| SUBSET   | Rank | MAF         | Geno Counts                | Subjects  | score X2 | score p-value | df | het OR | het OR 95% CI | het OR 95% CI | hom OR | hom OR 95% CI | hom OR 95% CI_u |
|----------|------|-------------|----------------------------|-----------|----------|---------------|----|--------|---------------|---------------|--------|---------------|-----------------|
| STAGE1-3 | 12   | 0.374 0.360 | 3426 4157 1207 533 588 171 | 8790 1292 | 2.36     | 0.3065605     | 2  | 0.91   | 0.80          | 1.04          | 0.90   | 0.75          | 1.09            |
| NHS      | 18   | 0.382 0.374 | 429 553 159 73 83 27       | 1141 183  | 0.71     | 0.7009351     | 2  | 0.87   | 0.62          | 1.22          | 0.96   | 0.59          | 1.56            |
| STAGE1-2 | 14   | 0.383 0.362 | 1953 2611 714 311 356 100  | 5278 767  | 3.54     | 0.1699685     | 2  | 0.86   | 0.73          | 1.02          | 0.85   | 0.67          | 1.09            |
| STAGE2   | 12   | 0.383 0.359 | 1524 2058 555 238 273 73   | 4137 584  | 3.30     | 0.1920892     | 2  | 0.85   | 0.71          | 1.03          | 0.82   | 0.61          | 1.09            |
| PBCS1    | 18   | 0.375 0.381 | 193 244 67 74 86 29        | 504 189   | 0.37     | 0.8305261     | 2  | 0.98   | 0.68          | 1.42          | 1.15   | 0.68          | 1.93            |

|          |    |             |                          |          |      |           |   |      |      |      |      |      |      |
|----------|----|-------------|--------------------------|----------|------|-----------|---|------|------|------|------|------|------|
| PLCO     | 18 | 0.371 0.358 | 371 484 120 30 35 9      | 975 74   | 0.43 | 0.8052884 | 2 | 0.85 | 0.51 | 1.42 | 0.87 | 0.40 | 1.93 |
| WHI      | 5  | 0.385 0.342 | 871 1215 320 124 140 31  | 2406 295 | 4.97 | 0.0834406 | 2 | 0.80 | 0.61 | 1.03 | 0.67 | 0.44 | 1.01 |
| STAGE3   | 22 | 0.361 0.356 | 1473 1545 494 222 232 71 | 3512 525 | 0.13 | 0.9388293 | 2 | 0.99 | 0.82 | 1.21 | 0.95 | 0.71 | 1.27 |
| NHS2     | 6  | 0.364 0.341 | 446 495 150 41 30 14     | 1091 85  | 3.51 | 0.173045  | 2 | 0.64 | 0.39 | 1.05 | 0.98 | 0.52 | 1.85 |
| PBCS2    | 22 | 0.359 0.366 | 732 784 238 141 153 49   | 1754 343 | 0.14 | 0.9335043 | 2 | 1.01 | 0.79 | 1.30 | 1.07 | 0.75 | 1.53 |
| WHS      | 2  | 0.358 0.335 | 295 266 106 40 49 8      | 667 97   | 6.58 | 0.0372111 | 2 | 1.34 | 0.85 | 2.12 | 0.50 | 0.23 | 1.12 |
| PBCS 1+2 | 16 | 0.362 0.371 | 925 1029 304 215 239 78  | 2258 532 | 0.55 | 0.7595476 | 2 | 0.98 | 0.80 | 1.21 | 1.09 | 0.82 | 1.47 |

Locus Alleles Chr Location Neighborhood  
rs7121523 G|A 11p15.4 7556781 PPFIBP2

| SUBSET   | Rank | MAF         | Geno Counts              | Subjects  | score X2 | score p-value | df | het OR | het OR 95% CI | het OR 95% CI | hom OR | hom OR 95% CI | hom OR 95% CI_u |
|----------|------|-------------|--------------------------|-----------|----------|---------------|----|--------|---------------|---------------|--------|---------------|-----------------|
| STAGE1-3 | 13   | 0.156 0.162 | 6264 2378 185/908 352 33 | 8827 1293 | 1.90     | 0.3873854     | 2  | 1.05   | 0.92          | 1.21          | 1.27   | 0.86          | 1.85            |
| NHS      | 20   | 0.159 0.164 | 807 306 28 129 48 6      | 1141 183  | 0.26     | 0.8762486     | 2  | 0.99   | 0.69          | 1.42          | 1.26   | 0.51          | 3.13            |
| STAGE1-2 | 7    | 0.155 0.175 | 3739 1443 99/522 222 23  | 5281 767  | 6.49     | 0.038982      | 2  | 1.13   | 0.95          | 1.34          | 1.72   | 1.07          | 2.75            |
| STAGE2   | 5    | 0.154 0.178 | 2932 1137 71/393 174 17  | 4140 584  | 7.64     | 0.0219688     | 2  | 1.18   | 0.97          | 1.43          | 1.94   | 1.12          | 3.37            |
| PBCS1    | 8    | 0.138 0.148 | 373 123 8 134 54 1       | 504 189   | 1.84     | 0.3981856     | 2  | 1.18   | 0.81          | 1.74          | 0.36   | 0.04          | 2.93            |
| PLCO     | 2    | 0.156 0.230 | 688 270 17/41 32 1       | 975 74    | 7.58     | 0.0225918     | 2  | 1.96   | 1.20          | 3.20          | 0.97   | 0.12          | 7.68            |
| WHI      | 1    | 0.154 0.186 | 1704 664 40/200 80 15    | 2408 295  | 15.35    | 0.0004633     | 2  | 1.04   | 0.79          | 1.37          | 3.21   | 1.74          | 5.93            |
| STAGE3   | 18   | 0.156 0.143 | 2525 935 85/386 130 10   | 3545 526  | 0.78     | 0.6754353     | 2  | 0.93   | 0.75          | 1.16          | 0.80   | 0.41          | 1.55            |
| NHS2     | 22   | 0.167 0.161 | 777 314 30/61 24 2       | 1121 87   | 0.10     | 0.9491438     | 2  | 0.96   | 0.58          | 1.56          | 0.81   | 0.19          | 3.48            |
| PBCS2    | 15   | 0.148 0.136 | 1266 440 38/254 81 6     | 1744 341  | 0.69     | 0.7075004     | 2  | 0.91   | 0.69          | 1.20          | 0.78   | 0.33          | 1.86            |
| WHS      | 22   | 0.158 0.148 | 482 181 17/71 25 2       | 680 98    | 0.28     | 0.8699051     | 2  | 0.96   | 0.59          | 1.58          | 0.67   | 0.15          | 3.05            |
| PBCS 1+2 | 11   | 0.146 0.141 | 1639 563 47/388 135 7    | 2249 530  | 1.10     | 0.5780776     | 2  | 1.01   | 0.81          | 1.26          | 0.66   | 0.29          | 1.47            |

Locus Alleles Chr Location Neighborhood  
rs12622050 G|A 2q11.2 100945886 NPAS2

| SUBSET   | Rank | MAF         | Geno Counts              | Subjects  | score X2 | score p-value | df | het OR | het OR 95% CI | het OR 95% CI | hom OR | hom OR 95% CI | hom OR 95% CI_u |
|----------|------|-------------|--------------------------|-----------|----------|---------------|----|--------|---------------|---------------|--------|---------------|-----------------|
| STAGE1-3 | 14   | 0.225 0.225 | 5271 3090 432/779 439 70 | 8793 1288 | 1.47     | 0.4784246     | 2  | 0.93   | 0.82          | 1.05          | 1.01   | 0.77          | 1.31            |
| NHS      | 9    | 0.220 0.191 | 694 392 55 122 52 9      | 1141 183  | 2.78     | 0.2485347     | 2  | 0.74   | 0.52          | 1.05          | 0.89   | 0.43          | 1.86            |
| STAGE1-2 | 8    | 0.220 0.202 | 3182 1875 227/492 240 35 | 5284 767  | 6.41     | 0.0405122     | 2  | 0.81   | 0.68          | 0.95          | 0.93   | 0.64          | 1.35            |
| STAGE2   | 10   | 0.220 0.205 | 2488 1483 172/370 188 26 | 4143 584  | 3.84     | 0.1469385     | 2  | 0.83   | 0.68          | 1.00          | 0.94   | 0.60          | 1.46            |
| PBCS1    | 15   | 0.244 0.222 | 284 197 25 114 66 9      | 506 189   | 0.85     | 0.6534054     | 2  | 0.85   | 0.60          | 1.22          | 0.84   | 0.37          | 1.88            |
| PLCO     | 15   | 0.229 0.203 | 577 350 48/47 24 3       | 975 74    | 0.70     | 0.7049764     | 2  | 0.84   | 0.50          | 1.40          | 0.70   | 0.21          | 2.36            |
| WHI      | 11   | 0.213 0.198 | 1476 838 95/192 89 14    | 2409 295  | 3.03     | 0.2197358     | 2  | 0.80   | 0.61          | 1.05          | 1.12   | 0.63          | 2.01            |
| STAGE3   | 10   | 0.232 0.258 | 2090 1217 205/287 199 35 | 3512 521  | 1.70     | 0.4271752     | 2  | 1.13   | 0.93          | 1.38          | 1.15   | 0.78          | 1.68            |
| NHS2     | 19   | 0.200 0.204 | 712 332 53/51 27 3       | 1097 81   | 0.46     | 0.795491      | 2  | 1.13   | 0.69          | 1.83          | 0.78   | 0.24          | 2.59            |
| PBCS2    | 6    | 0.252 0.278 | 980 644 117/177 141 25   | 1741 343  | 2.43     | 0.2970019     | 2  | 1.21   | 0.95          | 1.54          | 1.18   | 0.74          | 1.87            |
| WHS      | 17   | 0.231 0.232 | 398 241 35/59 31 7       | 674 97    | 1.11     | 0.5739392     | 2  | 0.85   | 0.53          | 1.36          | 1.35   | 0.57          | 3.22            |
| PBCS 1+2 | 14   | 0.250 0.258 | 1263 839 142/291 207 34  | 2244 532  | 0.80     | 0.6696249     | 2  | 1.10   | 0.90          | 1.34          | 1.06   | 0.71          | 1.58            |

Locus Alleles Chr Location Neighborhood  
rs37936 A|G 7q21.11 79806994

| SUBSET   | Rank | MAF         | Geno Counts                | Subjects  | score X2 | score p-value | df | het OR | het OR 95% CI | het OR 95% CI | hom OR | hom OR 95% CI | hom OR 95% CI_u |
|----------|------|-------------|----------------------------|-----------|----------|---------------|----|--------|---------------|---------------|--------|---------------|-----------------|
| STAGE1-3 | 15   | 0.384 0.370 | 3358 3974 1348/513 560 186 | 8680 1259 | 1.36     | 0.5065588     | 2  | 0.93   | 0.81          | 1.06          | 0.94   | 0.78          | 1.13            |
| NHS      | 3    | 0.399 0.369 | 403 541 177/77 68 31       | 1121 176  | 6.13     | 0.0467686     | 2  | 0.65   | 0.46          | 0.92          | 0.91   | 0.57          | 1.43            |
| STAGE1-2 | 16   | 0.400 0.376 | 1731 2149 796/227 246 88   | 4676 561  | 3.02     | 0.2205775     | 2  | 0.86   | 0.71          | 1.05          | 0.83   | 0.64          | 1.08            |
| STAGE2   | 17   | 0.400 0.379 | 1328 1608 619/150 178 57   | 3555 385  | 2.00     | 0.3684582     | 2  | 0.98   | 0.78          | 1.23          | 0.80   | 0.58          | 1.10            |
| PLCO     | 17   | 0.378 0.396 | 379 431 146/26 35 11       | 956 72    | 0.46     | 0.7938521     | 2  | 1.20   | 0.71          | 2.05          | 1.13   | 0.54          | 2.36            |
| WHI      | 16   | 0.409 0.387 | 857 1064 430/111 131 46    | 2351 288  | 1.02     | 0.6018528     | 2  | 0.95   | 0.72          | 1.24          | 0.83   | 0.58          | 1.19            |
| STAGE3   | 16   | 0.366 0.382 | 1434 1610 490/203 238 80   | 3534 521  | 1.01     | 0.604049      | 2  | 1.04   | 0.85          | 1.27          | 1.16   | 0.87          | 1.53            |
| NHS2     | 5    | 0.366 0.419 | 457 508 157/32 36 18       | 1122 86   | 3.64     | 0.1624217     | 2  | 1.02   | 0.62          | 1.68          | 1.72   | 0.93          | 3.16            |
| PBCS2    | 9    | 0.368 0.362 | 706 782 248/134 163 41     | 1736 338  | 1.93     | 0.3806624     | 2  | 1.10   | 0.86          | 1.41          | 0.85   | 0.58          | 1.25            |
| WHS      | 1    | 0.362 0.418 | 271 320 85/37 39 21        | 676 97    | 6.73     | 0.034606      | 2  | 0.85   | 0.52          | 1.38          | 1.84   | 1.00          | 3.37            |
| PBCS 1+2 | 7    | 0.367 0.347 | 899 997 310/217 239 59     | 2206 515  | 1.89     | 0.3878473     | 2  | 1.00   | 0.81          | 1.23          | 0.81   | 0.59          | 1.12            |



| Locus     | Alleles | Chr         | Location                 | Neighborhood |          |               |    |        |               |               |        |               |               |               |
|-----------|---------|-------------|--------------------------|--------------|----------|---------------|----|--------|---------------|---------------|--------|---------------|---------------|---------------|
| rs2067980 | A G     | 5p12        |                          | 45018074     |          |               |    |        |               |               |        |               |               |               |
| SUBSET    | Rank    | MAF         | Geno Counts              | Subjects     | score X2 | score p-value | df | het OR | het OR 95% CI | het OR 95% CI | hom OR | hom OR 95% CI | hom OR 95% CI | hom OR 95% CI |
| STAGE1-3  | 16      | 0.160 0.163 | 6228 2348 240 902 356 32 | 8816 1290    | 1.30     | 0.5228024     | 2  | 1.00   | 0.87          | 1.14          | 0.81   | 0.55          | 1.18          |               |
| NHS       | 15      | 0.151 0.172 | 814 310 17 125 53 5      | 1141 183     | 1.89     | 0.3889462     | 2  | 1.11   | 0.78          | 1.57          | 1.95   | 0.70          | 5.44          |               |
| STAGE1-2  | 21      | 0.150 0.170 | 3805 1374 105 530 213 24 | 5284 767     | 1.93     | 0.3805665     | 2  | 1.05   | 0.88          | 1.25          | 1.34   | 0.84          | 2.15          |               |
| STAGE2    | 21      | 0.150 0.170 | 2991 1064 88 405 160 19  | 4143 584     | 0.65     | 0.7236617     | 2  | 1.03   | 0.84          | 1.26          | 1.24   | 0.73          | 2.10          |               |
| PBCS1     | 2       | 0.191 0.251 | 335 149 22 107 69 13     | 506 189      | 6.12     | 0.0469619     | 2  | 1.45   | 1.01          | 2.10          | 1.95   | 0.93          | 4.09          |               |
| PLCO      | 16      | 0.144 0.122 | 714 241 20 57 16 1       | 975 74       | 0.47     | 0.7902351     | 2  | 0.84   | 0.47          | 1.50          | 0.67   | 0.09          | 5.21          |               |
| WHI       | 22      | 0.143 0.134 | 1761 606 42 221 69 5     | 2409 295     | 0.56     | 0.7552421     | 2  | 0.90   | 0.67          | 1.20          | 0.92   | 0.36          | 2.35          |               |
| STAGE3    | 1       | 0.176 0.152 | 2423 975 135 372 143 8   | 3533 523     | 7.54     | 0.0230685     | 2  | 0.93   | 0.76          | 1.15          | 0.38   | 0.18          | 0.78          |               |
| NHS2      | 23      | 0.169 0.149 | 777 292 42 59 25 0       | 1111 84      |          |               |    |        |               |               |        |               |               |               |
| PBCS2     | 1       | 0.190 0.156 | 1158 519 73 243 93 7     | 1750 343     | 4.72     | 0.0944628     | 2  | 0.85   | 0.66          | 1.11          | 0.47   | 0.21          | 1.03          |               |
| WHS       | 15      | 0.152 0.141 | 488 164 20 70 25 1       | 672 96       | 1.17     | 0.5570229     | 2  | 1.10   | 0.67          | 1.80          | 0.38   | 0.05          | 2.85          |               |
| PBCS 1+2  | 19      | 0.190 0.190 | 1493 667 95 350 162 20   | 2255 532     | 0.30     | 0.8593375     | 2  | 1.02   | 0.83          | 1.26          | 0.88   | 0.54          | 1.46          |               |

| Locus     | Alleles | Chr         | Location                   | Neighborhood |          |               |    |        |               |               |        |               |               |               |
|-----------|---------|-------------|----------------------------|--------------|----------|---------------|----|--------|---------------|---------------|--------|---------------|---------------|---------------|
| rs4415084 | C T     | 5p12        |                            | 44698272     |          |               |    |        |               |               |        |               |               |               |
| SUBSET    | Rank    | MAF         | Geno Counts                | Subjects     | score X2 | score p-value | df | het OR | het OR 95% CI | het OR 95% CI | hom OR | hom OR 95% CI | hom OR 95% CI | hom OR 95% CI |
| STAGE1-3  | 17      | 0.407 0.422 | 3135 4180 1492 434 623 232 | 8807 1289    | 1.24     | 0.5384788     | 2  | 1.06   | 0.93          | 1.21          | 1.09   | 0.92          | 1.30          |               |
| NHS       | 6       | 0.392 0.448 | 429 513 185 57 87 38       | 1127 182     | 3.84     | 0.1463672     | 2  | 1.28   | 0.89          | 1.84          | 1.54   | 0.98          | 2.41          |               |
| STAGE1-2  | 20      | 0.401 0.422 | 1895 2517 857 264 358 144  | 5269 766     | 2.12     | 0.3462021     | 2  | 1.01   | 0.85          | 1.20          | 1.17   | 0.93          | 1.46          |               |
| STAGE2    | 20      | 0.404 0.414 | 1466 2004 672 207 271 106  | 4142 584     | 1.18     | 0.5530118     | 2  | 0.94   | 0.77          | 1.14          | 1.07   | 0.83          | 1.38          |               |
| PBCS1     | 1       | 0.410 0.476 | 174 249 83 55 88 46        | 506 189      | 7.15     | 0.0279946     | 2  | 1.14   | 0.77          | 1.70          | 1.88   | 1.16          | 3.04          |               |
| PLCO      | 4       | 0.408 0.338 | 339 475 160 28 42 4        | 974 74       | 6.50     | 0.0387306     | 2  | 1.08   | 0.65          | 1.80          | 0.30   | 0.10          | 0.88          |               |
| WHI       | 15      | 0.400 0.402 | 866 1158 385 111 131 53    | 2409 295     | 1.52     | 0.468146      | 2  | 0.88   | 0.67          | 1.15          | 1.05   | 0.74          | 1.49          |               |
| STAGE3    | 7       | 0.415 0.422 | 1240 1666 636 171 265 89   | 3542 525     | 1.85     | 0.3958267     | 2  | 1.14   | 0.93          | 1.40          | 1.01   | 0.76          | 1.33          |               |
| NHS2      | 20      | 0.402 0.403 | 413 517 193 31 43 14       | 1123 88      | 0.33     | 0.8481965     | 2  | 1.13   | 0.70          | 1.83          | 0.98   | 0.51          | 1.90          |               |
| PBCS2     | 18      | 0.424 0.413 | 593 833 328 117 165 58     | 1754 340     | 0.37     | 0.8297638     | 2  | 1.01   | 0.78          | 1.31          | 0.92   | 0.65          | 1.29          |               |
| WHS       | 3       | 0.411 0.469 | 234 316 115 23 57 17       | 665 97       | 6.13     | 0.0466677     | 2  | 1.92   | 1.14          | 3.23          | 1.61   | 0.82          | 3.17          |               |
| PBCS 1+2  | 12      | 0.421 0.435 | 767 1079 410 171 253 103   | 2256 527     | 0.95     | 0.6228454     | 2  | 1.04   | 0.84          | 1.29          | 1.15   | 0.87          | 1.51          |               |

| Locus     | Alleles | Chr         | Location                   | Neighborhood       |          |               |    |        |               |               |        |               |               |               |
|-----------|---------|-------------|----------------------------|--------------------|----------|---------------|----|--------|---------------|---------------|--------|---------------|---------------|---------------|
| rs9491859 | C A     | 6q22.33     |                            | 128106056 C6orf190 |          |               |    |        |               |               |        |               |               |               |
| SUBSET    | Rank    | MAF         | Geno Counts                | Subjects           | score X2 | score p-value | df | het OR | het OR 95% CI | het OR 95% CI | hom OR | hom OR 95% CI | hom OR 95% CI | hom OR 95% CI |
| STAGE1-3  | 18      | 0.352 0.357 | 3704 4014 1097 525 602 158 | 8815 1285          | 0.93     | 0.6287521     | 2  | 1.06   | 0.94          | 1.21          | 1.02   | 0.84          | 1.24          |               |
| NHS       | 14      | 0.356 0.388 | 459 551 130 67 90 26       | 1140 183           | 1.89     | 0.3884684     | 2  | 1.13   | 0.81          | 1.60          | 1.41   | 0.86          | 2.32          |               |
| STAGE1-2  | 13      | 0.348 0.374 | 2226 2432 625 301 359 107  | 5283 767           | 3.83     | 0.1474959     | 2  | 1.10   | 0.93          | 1.30          | 1.27   | 0.99          | 1.61          |               |
| STAGE2    | 16      | 0.346 0.369 | 1767 1881 495 234 269 81   | 4143 584           | 2.31     | 0.3146472     | 2  | 1.10   | 0.91          | 1.33          | 1.23   | 0.93          | 1.63          |               |
| PBCS1     | 12      | 0.345 0.354 | 216 231 59 83 78 28        | 506 189            | 1.43     | 0.4897104     | 2  | 0.89   | 0.61          | 1.28          | 1.22   | 0.72          | 2.06          |               |
| PLCO      | 14      | 0.333 0.378 | 437 427 111 29 34 11       | 975 74             | 1.21     | 0.5454536     | 2  | 1.17   | 0.70          | 1.97          | 1.50   | 0.72          | 3.15          |               |
| WHI       | 13      | 0.351 0.385 | 1018 1093 298 110 143 42   | 2409 295           | 2.61     | 0.2712073     | 2  | 1.21   | 0.93          | 1.57          | 1.28   | 0.88          | 1.88          |               |
| STAGE3    | 2       | 0.358 0.333 | 1479 1586 472 224 243 51   | 3537 518           | 4.26     | 0.1189721     | 2  | 1.02   | 0.84          | 1.24          | 0.73   | 0.53          | 1.01          |               |
| NHS2      | 12      | 0.368 0.335 | 459 501 163 35 39 8        | 1123 82            | 1.45     | 0.4846521     | 2  | 1.04   | 0.64          | 1.67          | 0.65   | 0.29          | 1.43          |               |
| PBCS2     | 8       | 0.349 0.335 | 744 779 218 146 160 34     | 1741 340           | 1.96     | 0.3747398     | 2  | 1.04   | 0.81          | 1.33          | 0.78   | 0.52          | 1.17          |               |
| WHS       | 14      | 0.363 0.323 | 276 306 91 43 44 9         | 673 96             | 1.71     | 0.4246288     | 2  | 0.92   | 0.58          | 1.45          | 0.60   | 0.28          | 1.29          |               |
| PBCS 1+2  | 22      | 0.348 0.342 | 959 1006 277 229 238 62    | 2242 529           | 0.23     | 0.8921846     | 2  | 0.99   | 0.81          | 1.22          | 0.93   | 0.68          | 1.27          |               |

hom OR 95% CI

|          |    |             |                          |          |      |           |   |      |      |      |      |      |      |
|----------|----|-------------|--------------------------|----------|------|-----------|---|------|------|------|------|------|------|
| STAGE1-2 | 9  | 0.398 0.363 | 1509 1968 666 236 272 76 | 4143 584 | 5.91 | 0.0520198 | 2 | 0.85 | 0.71 | 1.03 | 0.72 | 0.55 | 0.96 |
| STAGE2   | 7  | 0.398 0.363 | 1509 1968 666 236 272 76 | 4143 584 | 5.87 | 0.0530012 | 2 | 0.85 | 0.71 | 1.03 | 0.72 | 0.55 | 0.96 |
| PBCS1    | 10 | 0.409 0.384 | 176 246 84 67 99 23      | 506 189  | 1.47 | 0.4795539 | 2 | 1.03 | 0.71 | 1.50 | 0.75 | 0.43 | 1.30 |
| PLCO     | 10 | 0.393 0.338 | 355 474 146 30 38 6      | 975 74   | 2.89 | 0.2362579 | 2 | 0.89 | 0.53 | 1.47 | 0.46 | 0.19 | 1.14 |
| WHI      | 4  | 0.397 0.351 | 890 1125 394 130 123 42  | 2409 295 | 5.46 | 0.0652059 | 2 | 0.75 | 0.58 | 0.97 | 0.74 | 0.51 | 1.07 |
| STAGE3   | 9  | 0.390 0.413 | 1315 1676 539 179 257 88 | 3530 524 | 1.73 | 0.4220895 | 2 | 1.09 | 0.89 | 1.34 | 1.20 | 0.91 | 1.58 |
| NHS2     | 4  | 0.382 0.436 | 428 504 169 31 35 20     | 1101 86  | 3.67 | 0.1595086 | 2 | 0.96 | 0.58 | 1.58 | 1.62 | 0.90 | 2.93 |
| PBCS2    | 10 | 0.399 0.411 | 621 858 268 111 181 50   | 1747 342 | 1.69 | 0.4302484 | 2 | 1.18 | 0.91 | 1.53 | 1.05 | 0.73 | 1.51 |
| WHS      | 18 | 0.380 0.401 | 266 314 102 37 41 18     | 682 96   | 1.01 | 0.6032208 | 2 | 0.94 | 0.58 | 1.52 | 1.28 | 0.69 | 2.36 |
| PBCS 1+2 | 4  | 0.402 0.401 | 795 1103 352 178 279 73  | 2250 530 | 2.37 | 0.3051439 | 2 | 1.12 | 0.91 | 1.38 | 0.92 | 0.68 | 1.24 |

Locus Alleles Chr Location Neighborhood  
rs724244 C|T 3p24.1 27217157 NEK10

| SUBSET   | Rank | MAF         | Geno Counts              | Subjects  | score X2 | score p-value | df | het OR | het OR 95% CI | het OR 95% CI | hom OR | hom OR 95% CI | hom OR 95% CI_u |
|----------|------|-------------|--------------------------|-----------|----------|---------------|----|--------|---------------|---------------|--------|---------------|-----------------|
| STAGE1-3 | 20   | 0.261 0.267 | 4211 2933 535 597 424 83 | 7679 1104 | 0.54     | 0.7614929     | 2  | 1.02   | 0.89          | 1.17          | 1.10   | 0.85          | 1.41            |
| STAGE1-2 | 12   | 0.252 0.276 | 2304 1588 250 308 228 47 | 4142 583  | 4.91     | 0.0857985     | 2  | 1.10   | 0.91          | 1.33          | 1.40   | 0.99          | 1.97            |
| STAGE2   | 9    | 0.252 0.276 | 2304 1588 250 308 228 47 | 4142 583  | 4.11     | 0.1281451     | 2  | 1.10   | 0.91          | 1.33          | 1.40   | 0.99          | 1.97            |
| PBCS1    | 20   | 0.246 0.250 | 293 177 36 106 70 12     | 506 188   | 0.24     | 0.8881717     | 2  | 1.09   | 0.76          | 1.57          | 1.01   | 0.50          | 2.05            |
| PLCO     | 3    | 0.230 0.257 | 569 364 42 44 22 8       | 975 74    | 6.90     | 0.0317027     | 2  | 0.81   | 0.47          | 1.38          | 2.57   | 1.10          | 6.01            |
| WHI      | 12   | 0.263 0.295 | 1302 949 158 145 126 24  | 2409 295  | 2.64     | 0.2665367     | 2  | 1.19   | 0.93          | 1.54          | 1.33   | 0.84          | 2.12            |
| STAGE3   | 19   | 0.271 0.258 | 1907 1349 285 290 196 37 | 3541 523  | 0.73     | 0.6934401     | 2  | 0.94   | 0.77          | 1.14          | 0.88   | 0.61          | 1.27            |
| NHS2     | 21   | 0.269 0.286 | 611 397 100 45 30 9      | 1108 84   | 0.25     | 0.8816344     | 2  | 1.04   | 0.64          | 1.68          | 1.21   | 0.57          | 2.56            |
| PBCS2    | 3    | 0.273 0.244 | 926 696 131 198 121 23   | 1753 342  | 2.88     | 0.2367498     | 2  | 0.81   | 0.64          | 1.04          | 0.83   | 0.52          | 1.33            |
| WHS      | 6    | 0.268 0.284 | 370 256 54 47 45 5       | 680 97    | 3.79     | 0.1501837     | 2  | 1.41   | 0.90          | 2.20          | 0.65   | 0.24          | 1.73            |
| PBCS 1+2 | 9    | 0.267 0.245 | 1219 869 167 303 191 34  | 2255 528  | 1.35     | 0.508083      | 2  | 0.90   | 0.74          | 1.11          | 0.85   | 0.57          | 1.26            |

Locus Alleles Chr Location Neighborhood  
rs11249433 T|C 1p11.2 120982136 LOC647121

| SUBSET   | Rank | MAF         | Geno Counts                | Subjects  | score X2 | score p-value | df | het OR | het OR 95% CI | het OR 95% CI | hom OR | hom OR 95% CI | hom OR 95% CI_u |
|----------|------|-------------|----------------------------|-----------|----------|---------------|----|--------|---------------|---------------|--------|---------------|-----------------|
| STAGE1-3 | 21   | 0.395 0.397 | 3255 4114 1412 474 598 209 | 8781 1281 | 0.52     | 0.7691338     | 2  | 1.03   | 0.90          | 1.17          | 1.07   | 0.89          | 1.27            |
| NHS      | 17   | 0.388 0.412 | 425 540 170 65 84 33       | 1135 182  | 1.40     | 0.4975555     | 2  | 1.02   | 0.72          | 1.45          | 1.30   | 0.82          | 2.05            |
| STAGE1-2 | 22   | 0.403 0.402 | 1899 2491 874 270 373 121  | 5264 764  | 0.90     | 0.6388828     | 2  | 1.08   | 0.91          | 1.28          | 1.02   | 0.81          | 1.29            |
| STAGE2   | 19   | 0.407 0.399 | 1474 1951 704 205 289 88   | 4129 582  | 1.86     | 0.395237      | 2  | 1.10   | 0.91          | 1.34          | 0.94   | 0.72          | 1.24            |
| PBCS1    | 9    | 0.387 0.392 | 195 230 81 67 96 26        | 506 189   | 1.80     | 0.4057345     | 2  | 1.26   | 0.87          | 1.83          | 0.99   | 0.58          | 1.69            |
| PLCO     | 20   | 0.420 0.411 | 324 476 169 26 34 13       | 969 73    | 0.20     | 0.9055689     | 2  | 0.89   | 0.52          | 1.52          | 0.96   | 0.48          | 1.94            |
| WHI      | 17   | 0.407 0.396 | 857 1133 411 105 145 44    | 2401 294  | 0.96     | 0.6199438     | 2  | 1.05   | 0.80          | 1.37          | 0.88   | 0.61          | 1.28            |
| STAGE3   | 6    | 0.383 0.388 | 1360 1625 538 204 225 88   | 3523 517  | 1.87     | 0.3932758     | 2  | 0.95   | 0.77          | 1.16          | 1.14   | 0.87          | 1.50            |
| NHS2     | 9    | 0.395 0.453 | 418 522 182 27 40 19       | 1122 86   | 2.03     | 0.3622778     | 2  | 1.17   | 0.71          | 1.94          | 1.56   | 0.84          | 2.88            |
| PBCS2    | 17   | 0.362 0.372 | 719 778 240 137 149 51     | 1737 337  | 0.47     | 0.7905654     | 2  | 1.00   | 0.78          | 1.29          | 1.12   | 0.79          | 1.60            |
| WHS      | 5    | 0.419 0.383 | 223 325 116 40 36 18       | 664 94    | 3.87     | 0.1443513     | 2  | 0.62   | 0.38          | 1.00          | 0.85   | 0.46          | 1.56            |
| PBCS 1+2 | 17   | 0.368 0.379 | 910 1006 321 204 245 77    | 2237 526  | 0.48     | 0.7853455     | 2  | 1.08   | 0.87          | 1.33          | 1.06   | 0.79          | 1.42            |

Locus Alleles Chr Location Neighborhood  
rs3817198 T|C 11p15.5 1865582 LSP1

| SUBSET   | Rank | MAF         | Geno Counts               | Subjects  | score X2 | score p-value | df | het OR | het OR 95% CI | het OR 95% CI | hom OR | hom OR 95% CI | hom OR 95% CI_u |
|----------|------|-------------|---------------------------|-----------|----------|---------------|----|--------|---------------|---------------|--------|---------------|-----------------|
| STAGE1-3 | 22   | 0.324 0.323 | 4021 3887 916 582 578 126 | 8824 1286 | 0.41     | 0.8148846     | 2  | 1.03   | 0.91          | 1.16          | 0.96   | 0.78          | 1.19            |
| NHS      | 12   | 0.318 0.308 | 524 509 108 82 88 12      | 1141 182  | 2.17     | 0.3379586     | 2  | 1.12   | 0.81          | 1.55          | 0.70   | 0.37          | 1.34            |
| STAGE1-2 | 18   | 0.325 0.334 | 2407 2311 562 329 359 76  | 5280 764  | 2.49     | 0.2876695     | 2  | 1.14   | 0.97          | 1.34          | 1.02   | 0.78          | 1.34            |
| STAGE2   | 18   | 0.327 0.343 | 1883 1802 454 247 271 64  | 4139 582  | 1.99     | 0.3690122     | 2  | 1.14   | 0.95          | 1.38          | 1.11   | 0.82          | 1.50            |
| PBCS1    | 21   | 0.319 0.321 | 229 228 47 84 86 17       | 504 187   | 0.04     | 0.9808207     | 2  | 1.02   | 0.72          | 1.47          | 0.97   | 0.52          | 1.80            |
| PLCO     | 12   | 0.335 0.365 | 440 417 118 28 38 8       | 975 74    | 1.80     | 0.4065525     | 2  | 1.40   | 0.84          | 2.34          | 1.04   | 0.46          | 2.37            |
| WHI      | 18   | 0.326 0.346 | 1097 1051 260 126 134 35  | 2408 295  | 0.90     | 0.6388742     | 2  | 1.11   | 0.86          | 1.44          | 1.16   | 0.78          | 1.74            |
| STAGE3   | 12   | 0.322 0.308 | 1613 1577 354 252 220 51  | 3544 523  | 1.58     | 0.4537187     | 2  | 0.89   | 0.73          | 1.08          | 0.90   | 0.65          | 1.25            |
| NHS2     | 2    | 0.317 0.259 | 518 491 109 50 29 8       | 1118 87   | 4.31     | 0.1158951     | 2  | 0.61   | 0.38          | 0.98          | 0.77   | 0.36          | 1.68            |

|          |    |             |                          |          |      |           |   |      |      |      |      |      |      |
|----------|----|-------------|--------------------------|----------|------|-----------|---|------|------|------|------|------|------|
| PBCS2    | 20 | 0.330 0.333 | 789 789 189 154 148 40   | 1767 342 | 0.32 | 0.8500638 | 2 | 0.98 | 0.76 | 1.25 | 1.09 | 0.74 | 1.60 |
| WHS      | 7  | 0.310 0.261 | 306 297 56 48 43 3       | 659 94   | 3.48 | 0.1759103 | 2 | 0.90 | 0.58 | 1.41 | 0.33 | 0.10 | 1.11 |
| PBCS 1+2 | 24 | 0.328 0.327 | 1019 1016 236 239 233 56 | 2271 528 | 0.06 | 0.97039   | 2 | 0.99 | 0.81 | 1.21 | 1.03 | 0.74 | 1.43 |

Locus rs10941679 Alleles A|G Chr 5p12 Location Neighborhood 44742255

| SUBSET   | Rank | MAF         | Geno Counts              | Subjects | score X2 | score p-value | df | het OR | het OR 95% CI | het OR 95% CI | hom OR | hom OR 95% CI | hom OR 95% CI_u |
|----------|------|-------------|--------------------------|----------|----------|---------------|----|--------|---------------|---------------|--------|---------------|-----------------|
| STAGE1-3 | 23   | 0.259 0.264 | 2201 1519 277 378 275 47 | 3997 700 | 0.15     | 0.9256571     | 2  | 1.03   | 0.87          | 1.23          | 1.01   | 0.72          | 1.41            |
| STAGE3   | 17   | 0.259 0.247 | 1945 1325 250 293 197 30 | 3520 520 | 0.95     | 0.6226459     | 2  | 0.99   | 0.81          | 1.20          | 0.82   | 0.55          | 1.23            |
| NHS2     | 13   | 0.256 0.268 | 607 415 73 46 28 8       | 1095 82  | 1.36     | 0.5075798     | 2  | 0.91   | 0.56          | 1.48          | 1.48   | 0.67          | 3.27            |
| PBCS2    | 4    | 0.259 0.235 | 969 667 121 196 130 15   | 1757 341 | 2.63     | 0.2689352     | 2  | 0.97   | 0.76          | 1.24          | 0.63   | 0.36          | 1.11            |
| WHS      | 19   | 0.266 0.273 | 369 243 56 51 39 7       | 668 97   | 0.80     | 0.6695481     | 2  | 1.21   | 0.77          | 1.91          | 0.95   | 0.41          | 2.23            |
| PBCS 1+2 | 21   | 0.259 0.261 | 1225 861 148 281 208 32  | 2234 521 | 0.24     | 0.8883381     | 2  | 1.04   | 0.85          | 1.27          | 0.95   | 0.63          | 1.43            |

Locus rs7716600 Alleles C|A Chr 5p12 Location Neighborhood 44910762

| SUBSET   | Rank | MAF         | Geno Counts              | Subjects  | score X2 | score p-value | df | het OR | het OR 95% CI | het OR 95% CI | hom OR | hom OR 95% CI | hom OR 95% CI_u |
|----------|------|-------------|--------------------------|-----------|----------|---------------|----|--------|---------------|---------------|--------|---------------|-----------------|
| STAGE1-3 | 24   | 0.220 0.220 | 5382 3016 434 787 439 65 | 8832 1291 | 0.03     | 0.9860526     | 2  | 0.99   | 0.87          | 1.13          | 1.01   | 0.77          | 1.33            |
| NHS      | 2    | 0.215 0.246 | 693 401 44 108 60 15     | 1138 183  | 6.48     | 0.0390855     | 2  | 0.95   | 0.68          | 1.34          | 2.13   | 1.14          | 3.99            |
| STAGE1-2 | 17   | 0.216 0.225 | 3227 1822 226 465 259 43 | 5275 767  | 2.65     | 0.2652186     | 2  | 0.96   | 0.82          | 1.14          | 1.29   | 0.91          | 1.82            |
| STAGE2   | 22   | 0.216 0.218 | 2534 1421 182 357 199 28 | 4137 584  | 0.23     | 0.8934073     | 2  | 0.97   | 0.80          | 1.17          | 1.06   | 0.69          | 1.61            |
| PBCS1    | 3    | 0.217 0.272 | 308 173 23 99 77 13      | 504 189   | 4.96     | 0.0837103     | 2  | 1.36   | 0.95          | 1.95          | 1.92   | 0.92          | 4.01            |
| PLCO     | 6    | 0.223 0.169 | 577 359 37 52 19 3       | 973 74    | 4.03     | 0.13336       | 2  | 0.57   | 0.33          | 0.99          | 0.92   | 0.27          | 3.15            |
| WHI      | 21   | 0.212 0.200 | 1499 797 111 188 96 11   | 2407 295  | 0.59     | 0.7428576     | 2  | 0.96   | 0.74          | 1.24          | 0.79   | 0.42          | 1.49            |
| STAGE3   | 5    | 0.226 0.214 | 2155 1196 208 322 180 22 | 3559 524  | 1.97     | 0.3733731     | 2  | 1.03   | 0.84          | 1.25          | 0.73   | 0.46          | 1.16            |
| NHS2     | 10   | 0.229 0.267 | 676 383 66 46 34 6       | 1125 86   | 1.65     | 0.4377773     | 2  | 1.33   | 0.83          | 2.10          | 1.38   | 0.57          | 3.37            |
| PBCS2    | 2    | 0.223 0.195 | 1070 586 98 219 111 11   | 1754 341  | 3.39     | 0.1837965     | 2  | 0.93   | 0.73          | 1.20          | 0.56   | 0.29          | 1.06            |
| WHS      | 20   | 0.232 0.232 | 409 227 44 57 35 5       | 680 97    | 0.61     | 0.7378339     | 2  | 1.16   | 0.73          | 1.83          | 0.85   | 0.32          | 2.25            |
| PBCS 1+2 | 15   | 0.221 0.223 | 1378 757 121 318 188 24  | 2256 530  | 0.80     | 0.6705684     | 2  | 1.06   | 0.87          | 1.30          | 0.88   | 0.55          | 1.39            |

adj\_trend

Locus rs17570439 Alleles T|C Chr 1p34.2 Location Neighborhood 40096797 TRIT1

| SUBSET   | Rank | MAF         | Geno Counts              | Subjects  | score X2 | score p-value | df | het OR | het OR 95% CI | het OR 95% CI | hom OR | hom OR 95% CI | hom OR 95% CI_u |
|----------|------|-------------|--------------------------|-----------|----------|---------------|----|--------|---------------|---------------|--------|---------------|-----------------|
| STAGE1-3 | 1    | 0.208 0.231 | 5507 2905 379 759 465 65 | 8791 1289 | 7.54     | 0.0060235     | 1  | 1.15   | 1.04          | 1.27          | 1.33   | 1.08          | 1.62            |
| NHS      | 4    | 0.204 0.238 | 718 381 42 107 65 11     | 1141 183  | 2.91     | 0.0879973     | 1  | 1.26   | 0.97          | 1.65          | 1.59   | 0.93          | 2.72            |
| STAGE1-2 | 5    | 0.208 0.233 | 3285 1798 201 446 283 37 | 5284 766  | 5.48     | 0.0192429     | 1  | 1.17   | 1.03          | 1.34          | 1.37   | 1.05          | 1.79            |
| STAGE2   | 8    | 0.209 0.232 | 2567 1417 159 339 218 26 | 4143 583  | 2.99     | 0.0836894     | 1  | 1.15   | 0.98          | 1.34          | 1.31   | 0.96          | 1.78            |
| PBCS1    | 20   | 0.210 0.214 | 310 179 17 113 71 5      | 506 189   | 0.06     | 0.8021576     | 1  | 0.96   | 0.71          | 1.31          | 0.92   | 0.50          | 1.71            |
| PLCO     | 15   | 0.220 0.243 | 599 323 53 40 32 2       | 975 74    | 0.31     | 0.5781529     | 1  | 1.12   | 0.75          | 1.65          | 1.25   | 0.57          | 2.74            |
| WHI      | 7    | 0.206 0.238 | 1501 825 83 171 106 17   | 2409 294  | 3.52     | 0.060739      | 1  | 1.22   | 0.99          | 1.50          | 1.49   | 0.98          | 2.25            |
| STAGE3   | 3    | 0.209 0.228 | 2222 1108 178 313 182 28 | 3508 523  | 1.80     | 0.1796915     | 1  | 1.11   | 0.95          | 1.30          | 1.24   | 0.91          | 1.68            |
| NHS2     | 11   | 0.208 0.235 | 694 332 60 51 28 6       | 1086 85   | 0.47     | 0.4912781     | 1  | 1.13   | 0.79          | 1.62          | 1.28   | 0.63          | 2.62            |
| PBCS2    | 15   | 0.208 0.215 | 1111 557 86 211 115 16   | 1754 342  | 0.14     | 0.7042992     | 1  | 1.04   | 0.85          | 1.27          | 1.08   | 0.73          | 1.60            |
| WHS      | 5    | 0.212 0.266 | 417 219 32 51 39 6       | 668 96    | 2.39     | 0.1217714     | 1  | 1.32   | 0.93          | 1.87          | 1.73   | 0.86          | 3.49            |
| PBCS 1+2 | 16   | 0.208 0.215 | 1421 735 103 324 186 21  | 2259 531  | 0.13     | 0.7235883     | 1  | 1.03   | 0.87          | 1.22          | 1.06   | 0.76          | 1.48            |

hom OR 95% CI

|          |    |             |                          |          |      |           |   |      |      |      |      |      |      |
|----------|----|-------------|--------------------------|----------|------|-----------|---|------|------|------|------|------|------|
| STAGE2   | 7  | 0.230 0.254 | 2444 1493 206 319 233 32 | 4143 584 | 3.41 | 0.0648422 | 1 | 1.15 | 0.99 | 1.33 | 1.32 | 0.98 | 1.77 |
| PBCS1    | 22 | 0.226 0.235 | 299 185 22 106 77 6      | 506 189  | -    | 0.9998322 | 1 | 1.00 | 0.74 | 1.34 | 1.00 | 0.55 | 1.81 |
| PLCO     | 16 | 0.236 0.264 | 578 334 63 38 33 3       | 975 74   | 0.31 | 0.579946  | 1 | 1.11 | 0.76 | 1.63 | 1.24 | 0.58 | 2.65 |
| WHI      | 6  | 0.229 0.264 | 1421 875 113 160 114 21  | 2409 295 | 3.77 | 0.05212   | 1 | 1.22 | 1.00 | 1.48 | 1.48 | 1.00 | 2.20 |
| STAGE3   | 8  | 0.226 0.241 | 2160 1196 207 302 188 32 | 3563 522 | 1.15 | 0.2831634 | 1 | 1.09 | 0.93 | 1.26 | 1.18 | 0.87 | 1.60 |
| NHS2     | 23 | 0.228 0.229 | 687 372 72 52 24 7       | 1131 83  | 0.01 | 0.9404369 | 1 | 0.99 | 0.69 | 1.42 | 0.97 | 0.47 | 2.01 |
| PBCS2    | 20 | 0.226 0.230 | 1063 591 102 202 124 17  | 1756 343 | 0.04 | 0.8385828 | 1 | 1.02 | 0.84 | 1.24 | 1.04 | 0.71 | 1.53 |
| WHS      | 1  | 0.221 0.292 | 410 233 33 48 40 8       | 676 96   | 4.12 | 0.0424283 | 1 | 1.42 | 1.01 | 2.00 | 2.02 | 1.02 | 4.01 |
| PBCS 1+2 | 17 | 0.226 0.232 | 1362 776 124 308 200 23  | 2262 531 | 0.10 | 0.7481524 | 1 | 1.03 | 0.87 | 1.21 | 1.05 | 0.76 | 1.45 |

Locus Alleles Chr Location Neighborhood  
rs2303659 G|A 11q24.3 129326474 PRDM10

| SUBSET   | Rank | MAF         | Geno Counts           | Subjects  | score X2 | score p-value | df | het OR | het OR 95% CI | het OR 95% CI | hom OR | hom OR 95% CI | hom OR 95% CI_u |
|----------|------|-------------|-----------------------|-----------|----------|---------------|----|--------|---------------|---------------|--------|---------------|-----------------|
| STAGE1-3 | 3    | 0.034 0.024 | 8222 583 10 1229 59 2 | 8815 1290 | 6.57     | 0.0103534     | 1  | 0.71   | 0.54          | 0.92          | 0.50   | 0.29          | 0.85            |
| NHS      | 9    | 0.034 0.022 | 1063 78 0 175 8 0     | 1141 183  | 1.78     | 0.1822792     | 1  | 0.60   | 0.29          | 1.28          | 0.36   | 0.08          | 1.63            |
| STAGE1-2 | 3    | 0.034 0.022 | 4926 356 2 733 34 0   | 5284 767  | 6.33     | 0.0118996     | 1  | 0.63   | 0.44          | 0.91          | 0.40   | 0.19          | 0.82            |
| STAGE2   | 5    | 0.034 0.022 | 3863 278 2 558 26 0   | 4143 584  | 4.55     | 0.0329972     | 1  | 0.64   | 0.42          | 0.97          | 0.41   | 0.18          | 0.94            |
| PBCS1    | 5    | 0.033 0.021 | 473 33 0 181 8 0      | 506 189   | 1.57     | 0.2101808     | 1  | 0.60   | 0.27          | 1.34          | 0.36   | 0.07          | 1.80            |
| PLCO     | 8    | 0.036 0.020 | 906 68 1 71 3 0       | 975 74    | 1.02     | 0.3115957     | 1  | 0.55   | 0.17          | 1.79          | 0.30   | 0.03          | 3.19            |
| WHI      | 12   | 0.034 0.025 | 2245 163 1 280 15 0   | 2409 295  | 1.51     | 0.2193102     | 1  | 0.71   | 0.41          | 1.23          | 0.51   | 0.17          | 1.50            |
| STAGE3   | 9    | 0.034 0.028 | 3296 227 8 496 25 2   | 3531 523  | 1.07     | 0.3004465     | 1  | 0.81   | 0.55          | 1.20          | 0.66   | 0.30          | 1.44            |
| NHS2     | 24   | 0.039 0.000 | 1029 77 5 84 0 0      | 1111 84   |          |               |    |        |               |               |        |               |                 |
| PBCS2    | 23   | 0.032 0.033 | 1648 112 1 322 21 1   | 1761 344  | 0.02     | 0.8760329     | 1  | 1.04   | 0.66          | 1.64          | 1.08   | 0.43          | 2.68            |
| WHS      | 20   | 0.032 0.032 | 619 38 2 90 4 1       | 659 95    | 0.07     | 0.7907514     | 1  | 0.89   | 0.38          | 2.11          | 0.79   | 0.14          | 4.44            |
| PBCS 1+2 | 9    | 0.032 0.029 | 2121 145 1 503 29 1   | 2267 533  | 0.33     | 0.5677343     | 1  | 0.89   | 0.60          | 1.33          | 0.79   | 0.36          | 1.76            |

Locus Alleles Chr Location Neighborhood  
rs7936636 C|T 11p11.2 44397546

| SUBSET   | Rank | MAF         | Geno Counts              | Subjects  | score X2 | score p-value | df | het OR | het OR 95% CI | het OR 95% CI | hom OR | hom OR 95% CI | hom OR 95% CI_u |
|----------|------|-------------|--------------------------|-----------|----------|---------------|----|--------|---------------|---------------|--------|---------------|-----------------|
| STAGE1-3 | 4    | 0.258 0.234 | 4826 3425 560 759 457 74 | 8811 1290 | 5.25     | 0.0219289     | 1  | 0.89   | 0.81          | 0.98          | 0.79   | 0.65          | 0.97            |
| NHS      | 6    | 0.256 0.219 | 634 430 77 110 66 7      | 1141 183  | 2.18     | 0.1395973     | 1  | 0.82   | 0.63          | 1.07          | 0.67   | 0.39          | 1.14            |
| STAGE1-2 | 1    | 0.263 0.226 | 2851 2086 344 465 258 44 | 5281 767  | 8.49     | 0.0035757     | 1  | 0.82   | 0.72          | 0.94          | 0.68   | 0.52          | 0.88            |
| STAGE2   | 2    | 0.264 0.228 | 2217 1656 267 355 192 37 | 4140 584  | 6.34     | 0.0118286     | 1  | 0.82   | 0.71          | 0.96          | 0.68   | 0.50          | 0.92            |
| PBCS1    | 8    | 0.247 0.228 | 284 193 28 115 62 12     | 505 189   | 0.74     | 0.3883889     | 1  | 0.88   | 0.66          | 1.17          | 0.78   | 0.44          | 1.38            |
| PLCO     | 17   | 0.263 0.243 | 526 385 64 45 22 7       | 975 74    | 0.28     | 0.5957946     | 1  | 0.90   | 0.60          | 1.34          | 0.81   | 0.36          | 1.79            |
| WHI      | 1    | 0.270 0.219 | 1272 973 163 181 99 15   | 2408 295  | 7.32     | 0.0068124     | 1  | 0.75   | 0.61          | 0.92          | 0.56   | 0.37          | 0.85            |
| STAGE3   | 24   | 0.251 0.248 | 1975 1339 216 294 199 30 | 3530 523  | 0.00     | 0.9612032     | 1  | 1.00   | 0.86          | 1.16          | 0.99   | 0.73          | 1.35            |
| NHS2     | 12   | 0.266 0.244 | 598 438 77 47 33 4       | 1113 84   | 0.46     | 0.4986024     | 1  | 0.88   | 0.61          | 1.27          | 0.78   | 0.37          | 1.62            |
| PBCS2    | 9    | 0.245 0.265 | 993 643 105 185 133 24   | 1741 342  | 1.06     | 0.3022317     | 1  | 1.10   | 0.92          | 1.33          | 1.22   | 0.84          | 1.77            |
| WHS      | 4    | 0.241 0.191 | 384 258 34 62 33 2       | 676 97    | 2.50     | 0.1135154     | 1  | 0.73   | 0.49          | 1.08          | 0.53   | 0.24          | 1.17            |
| PBCS 1+2 | 19   | 0.245 0.251 | 1277 836 133 300 195 36  | 2246 531  | 0.09     | 0.7610009     | 1  | 1.02   | 0.88          | 1.20          | 1.05   | 0.77          | 1.43            |

Locus Alleles Chr Location Neighborhood  
rs10850145 C|T 12q24.13 112428512

| SUBSET   | Rank | MAF         | Geno Counts              | Subjects  | score X2 | score p-value | df | het OR | het OR 95% CI | het OR 95% CI | hom OR | hom OR 95% CI | hom OR 95% CI_u |
|----------|------|-------------|--------------------------|-----------|----------|---------------|----|--------|---------------|---------------|--------|---------------|-----------------|
| STAGE1-3 | 5    | 0.094 0.108 | 7261 1521 74 1029 245 17 | 8856 1291 | 4.94     | 0.0262981     | 1  | 1.17   | 1.02          | 1.34          | 1.36   | 1.04          | 1.79            |
| NHS      | 1    | 0.085 0.117 | 951 185 5 145 33 5       | 1141 183  | 4.72     | 0.0298151     | 1  | 1.48   | 1.04          | 2.11          | 2.19   | 1.07          | 4.45            |
| STAGE1-2 | 6    | 0.089 0.108 | 4388 849 47 612 144 11   | 5284 767  | 5.41     | 0.0200633     | 1  | 1.23   | 1.03          | 1.48          | 1.52   | 1.07          | 2.18            |
| STAGE2   | 15   | 0.090 0.105 | 3437 664 42 467 111 6    | 4143 584  | 2.06     | 0.1516996     | 1  | 1.16   | 0.95          | 1.43          | 1.35   | 0.89          | 2.04            |
| PBCS1    | 14   | 0.094 0.101 | 417 83 6 152 36 1        | 506 189   | 0.17     | 0.6845841     | 1  | 1.09   | 0.73          | 1.63          | 1.18   | 0.53          | 2.65            |
| PLCO     | 2    | 0.077 0.122 | 832 135 8 56 18 0        | 975 74    | 3.60     | 0.0576194     | 1  | 1.65   | 0.98          | 2.79          | 2.73   | 0.96          | 7.79            |
| WHI      | 16   | 0.094 0.107 | 1982 403 24 236 55 4     | 2409 295  | 0.82     | 0.3649546     | 1  | 1.14   | 0.86          | 1.51          | 1.30   | 0.74          | 2.28            |
| STAGE3   | 14   | 0.102 0.108 | 2873 673 27 417 101 6    | 3573 524  | 0.54     | 0.4619844     | 1  | 1.08   | 0.87          | 1.34          | 1.18   | 0.76          | 1.81            |
| NHS2     | 7    | 0.103 0.137 | 905 207 12 65 15 4       | 1124 84   | 1.76     | 0.1846575     | 1  | 1.36   | 0.86          | 2.14          | 1.85   | 0.74          | 4.59            |

|          |    |             |                       |          |      |           |   |      |      |      |      |      |      |
|----------|----|-------------|-----------------------|----------|------|-----------|---|------|------|------|------|------|------|
| PBCS2    | 21 | 0.104 0.105 | 1412 338 15 273 68 2  | 1765 343 | 0.03 | 0.8671837 | 1 | 1.02 | 0.78 | 1.34 | 1.05 | 0.61 | 1.81 |
| WHS      | 23 | 0.094 0.093 | 556 128 0 79 18 0     | 684 97   | 0.03 | 0.8679701 | 1 | 1.05 | 0.60 | 1.82 | 1.10 | 0.36 | 3.32 |
| PBCS 1+2 | 12 | 0.102 0.103 | 1829 420 21 425 104 3 | 2270 532 | 0.17 | 0.6781002 | 1 | 1.05 | 0.84 | 1.31 | 1.10 | 0.70 | 1.72 |

Locus rs17740709 Alleles A|G Chr 12q21.31 Location Neighborhood 81947471 TMT2

| SUBSET   | Rank | MAF         | Geno Counts              | Subjects  | score X2 | score p-value | df | het OR | het OR 95% CI | het OR 95% CI | hom OR | hom OR 95% CI | hom OR 95% CI_u |
|----------|------|-------------|--------------------------|-----------|----------|---------------|----|--------|---------------|---------------|--------|---------------|-----------------|
| STAGE1-3 | 6    | 0.219 0.210 | 5354 3028 417 811 412 65 | 8799 1288 | 2.66     | 0.1031434     | 1  | 0.92   | 0.83          | 1.02          | 0.84   | 0.69          | 1.04            |
| NHS      | 5    | 0.218 0.180 | 691 402 48 121 58 4      | 1141 183  | 2.49     | 0.1142245     | 1  | 0.79   | 0.59          | 1.06          | 0.63   | 0.35          | 1.12            |
| STAGE1-2 | 19   | 0.218 0.213 | 3200 1869 215 481 246 40 | 5284 767  | 0.76     | 0.3821518     | 1  | 0.94   | 0.82          | 1.08          | 0.89   | 0.67          | 1.16            |
| STAGE2   | 21   | 0.217 0.223 | 2509 1467 167 360 188 36 | 4143 584  | 0.01     | 0.9050645     | 1  | 0.99   | 0.85          | 1.16          | 0.98   | 0.72          | 1.34            |
| PBCS1    | 13   | 0.242 0.254 | 282 203 21 106 70 13     | 506 189   | 0.30     | 0.5864398     | 1  | 1.08   | 0.81          | 1.44          | 1.17   | 0.66          | 2.08            |
| PLCO     | 21   | 0.214 0.209 | 603 326 46 48 21 5       | 975 74    | 0.05     | 0.8150004     | 1  | 0.95   | 0.63          | 1.44          | 0.91   | 0.40          | 2.07            |
| WHI      | 21   | 0.215 0.212 | 1466 851 92 187 91 17    | 2409 295  | 0.08     | 0.7738678     | 1  | 0.97   | 0.78          | 1.20          | 0.94   | 0.61          | 1.44            |
| STAGE3   | 4    | 0.222 0.207 | 2154 1160 202 330 166 25 | 3516 521  | 1.73     | 0.1878088     | 1  | 0.90   | 0.77          | 1.05          | 0.81   | 0.59          | 1.11            |
| NHS2     | 20   | 0.210 0.204 | 694 349 56 53 23 5       | 1099 81   | 0.02     | 0.8837667     | 1  | 0.97   | 0.66          | 1.43          | 0.94   | 0.43          | 2.06            |
| PBCS2    | 7    | 0.234 0.212 | 1042 597 112 215 109 18  | 1751 342  | 1.43     | 0.231633      | 1  | 0.89   | 0.73          | 1.08          | 0.79   | 0.53          | 1.16            |
| WHS      | 12   | 0.212 0.194 | 418 214 34 62 34 2       | 666 98    | 0.58     | 0.4460914     | 1  | 0.86   | 0.59          | 1.26          | 0.75   | 0.35          | 1.59            |
| PBCS 1+2 | 7    | 0.236 0.227 | 1324 799 133 321 179 31  | 2256 531  | 0.79     | 0.3728421     | 1  | 0.93   | 0.79          | 1.09          | 0.86   | 0.63          | 1.19            |

Locus rs998592 Alleles G|A Chr 16p13.13 Location Neighborhood 11107179 CLEC16A

| SUBSET   | Rank | MAF         | Geno Counts                | Subjects  | score X2 | score p-value | df | het OR | het OR 95% CI | het OR 95% CI | hom OR | hom OR 95% CI | hom OR 95% CI_u |
|----------|------|-------------|----------------------------|-----------|----------|---------------|----|--------|---------------|---------------|--------|---------------|-----------------|
| STAGE1-3 | 7    | 0.425 0.404 | 2956 4239 1625 446 647 199 | 8820 1292 | 2.21     | 0.1374669     | 1  | 0.94   | 0.86          | 1.02          | 0.88   | 0.74          | 1.04            |
| NHS      | 17   | 0.424 0.434 | 405 502 232 54 99 30       | 1139 183  | 0.17     | 0.6780117     | 1  | 1.05   | 0.84          | 1.30          | 1.10   | 0.71          | 1.69            |
| STAGE1-2 | 8    | 0.436 0.403 | 1716 2524 1042 264 388 115 | 5282 767  | 4.31     | 0.0379763     | 1  | 0.89   | 0.80          | 0.99          | 0.79   | 0.64          | 0.99            |
| STAGE2   | 1    | 0.440 0.393 | 1311 2022 810 210 289 85   | 4143 584  | 6.82     | 0.0090144     | 1  | 0.84   | 0.74          | 0.96          | 0.71   | 0.55          | 0.92            |
| PBCS1    | 4    | 0.415 0.368 | 186 220 100 74 91 24       | 506 189   | 1.73     | 0.188504      | 1  | 0.85   | 0.67          | 1.08          | 0.72   | 0.45          | 1.17            |
| PLCO     | 20   | 0.419 0.426 | 324 485 166 25 35 14       | 975 74    | 0.15     | 0.6943144     | 1  | 1.07   | 0.75          | 1.51          | 1.14   | 0.57          | 2.27            |
| WHI      | 2    | 0.450 0.403 | 729 1192 488 100 152 43    | 2409 295  | 4.98     | 0.0256018     | 1  | 0.82   | 0.69          | 0.98          | 0.67   | 0.47          | 0.95            |
| STAGE3   | 23   | 0.407 0.407 | 1240 1715 584 182 260 84   | 3539 526  | 0.03     | 0.8696393     | 1  | 1.01   | 0.88          | 1.16          | 1.02   | 0.78          | 1.34            |
| NHS2     | 1    | 0.417 0.482 | 378 542 193 22 43 19       | 1113 84   | 3.15     | 0.0758426     | 1  | 1.33   | 0.97          | 1.83          | 1.78   | 0.94          | 3.35            |
| PBCS2    | 19   | 0.400 0.397 | 625 849 274 122 171 51     | 1748 344  | 0.04     | 0.8368387     | 1  | 0.98   | 0.83          | 1.16          | 0.97   | 0.69          | 1.35            |
| WHS      | 13   | 0.412 0.378 | 237 324 117 38 46 14       | 678 98    | 0.41     | 0.5228361     | 1  | 0.90   | 0.66          | 1.23          | 0.82   | 0.44          | 1.52            |
| PBCS 1+2 | 5    | 0.403 0.386 | 811 1069 373 196 261 75    | 2253 532  | 0.87     | 0.3519726     | 1  | 0.94   | 0.82          | 1.08          | 0.88   | 0.67          | 1.16            |

Locus rs2391406 Alleles T|G Chr 13q33.3 Location Neighborhood 106586873

| SUBSET   | Rank | MAF         | Geno Counts                | Subjects  | score X2 | score p-value | df | het OR | het OR 95% CI | het OR 95% CI | hom OR | hom OR 95% CI | hom OR 95% CI_u |
|----------|------|-------------|----------------------------|-----------|----------|---------------|----|--------|---------------|---------------|--------|---------------|-----------------|
| STAGE1-3 | 8    | 0.372 0.360 | 3513 4015 1265 511 627 150 | 8793 1288 | 2.14     | 0.1431684     | 1  | 0.94   | 0.86          | 1.02          | 0.88   | 0.74          | 1.05            |
| NHS      | 15   | 0.371 0.358 | 452 529 159 72 91 20       | 1140 183  | 0.20     | 0.6542411     | 1  | 0.95   | 0.75          | 1.20          | 0.90   | 0.57          | 1.43            |
| STAGE1-2 | 15   | 0.375 0.354 | 2110 2378 788 308 373 85   | 5276 766  | 2.43     | 0.1190468     | 1  | 0.91   | 0.82          | 1.02          | 0.84   | 0.67          | 1.05            |
| STAGE2   | 12   | 0.376 0.353 | 1658 1849 629 236 282 65   | 4136 583  | 2.45     | 0.1175285     | 1  | 0.90   | 0.79          | 1.03          | 0.81   | 0.63          | 1.05            |
| PBCS1    | 10   | 0.387 0.362 | 195 230 81 78 84 26        | 506 188   | 0.47     | 0.4911277     | 1  | 0.92   | 0.72          | 1.17          | 0.84   | 0.51          | 1.38            |
| PLCO     | 12   | 0.376 0.345 | 398 416 157 29 39 6        | 971 74    | 0.48     | 0.4887403     | 1  | 0.89   | 0.63          | 1.25          | 0.78   | 0.39          | 1.57            |

UBE2O,AANAT

| SUBSET   | Rank | MAF         | Geno Counts                | Subjects  | score X2 | score p-value | df | het OR | het OR 95% CI | het OR 95% CI | hom OR | hom OR 95% CI | hom OR 95% CI |
|----------|------|-------------|----------------------------|-----------|----------|---------------|----|--------|---------------|---------------|--------|---------------|---------------|
| STAGE1-3 | 9    | 0.374 0.360 | 3426 4157 1207/533 588 171 | 8790 1292 | 1.97     | 0.1606069     | 1  | 0.94   | 0.86          | 1.03          | 0.88   | 0.74          | 1.05          |
| NHS      | 16   | 0.382 0.374 | 429 553 159/73 83 27       | 1141 183  | 0.18     | 0.6684325     | 1  | 0.95   | 0.75          | 1.20          | 0.90   | 0.57          | 1.44          |
| STAGE1-2 | 13   | 0.383 0.362 | 1953 2611 714/311 356 100  | 5278 767  | 2.80     | 0.0944011     | 1  | 0.91   | 0.81          | 1.02          | 0.82   | 0.65          | 1.03          |
| STAGE2   | 9    | 0.383 0.359 | 1524 2058 555/238 273 73   | 4137 584  | 2.96     | 0.0853517     | 1  | 0.89   | 0.78          | 1.02          | 0.79   | 0.61          | 1.04          |
| PBCS1    | 16   | 0.375 0.381 | 193 244 67/74 86 29        | 504 189   | 0.14     | 0.7068417     | 1  | 1.05   | 0.82          | 1.35          | 1.10   | 0.67          | 1.81          |
| PLCO     | 18   | 0.371 0.358 | 371 484 120/30 35 9        | 975 74    | 0.28     | 0.5985257     | 1  | 0.91   | 0.63          | 1.31          | 0.82   | 0.39          | 1.72          |
| WHI      | 3    | 0.385 0.342 | 871 1215 320/124 140 31    | 2406 295  | 4.87     | 0.0272777     | 1  | 0.81   | 0.67          | 0.98          | 0.66   | 0.45          | 0.95          |
| STAGE3   | 20   | 0.361 0.356 | 1473 1545 494/222 232 71   | 3512 525  | 0.09     | 0.7672934     | 1  | 0.98   | 0.86          | 1.12          | 0.96   | 0.74          | 1.25          |
| NHS2     | 10   | 0.364 0.341 | 446 495 150/41 30 14       | 1091 85   | 0.51     | 0.4742972     | 1  | 0.89   | 0.64          | 1.23          | 0.79   | 0.41          | 1.51          |
| PBCS2    | 17   | 0.359 0.366 | 732 784 238/141 153 49     | 1754 343  | 0.11     | 0.7403842     | 1  | 1.03   | 0.87          | 1.22          | 1.06   | 0.76          | 1.48          |
| WHS      | 11   | 0.358 0.335 | 295 266 106/40 49 8        | 667 97    | 0.71     | 0.4010576     | 1  | 0.88   | 0.64          | 1.19          | 0.77   | 0.42          | 1.42          |
| PBCS 1+2 | 11   | 0.362 0.371 | 925 1029 304/215 239 78    | 2258 532  | 0.17     | 0.6777764     | 1  | 1.03   | 0.90          | 1.18          | 1.06   | 0.80          | 1.40          |

Locus Alleles Chr Location Neighborhood  
rs1274466 T|C 10p11.21 34510210 PARD3

| SUBSET   | Rank | MAF         | Geno Counts                | Subjects  | score X2 | score p-value | df | het OR | het OR 95% CI | het OR 95% CI | hom OR | hom OR 95% CI | hom OR 95% CI |
|----------|------|-------------|----------------------------|-----------|----------|---------------|----|--------|---------------|---------------|--------|---------------|---------------|
| STAGE1-3 | 10   | 0.451 0.437 | 2683 4344 1810/399 650 238 | 8837 1287 | 1.89     | 0.1690524     | 1  | 0.94   | 0.87          | 1.03          | 0.89   | 0.75          | 1.05          |
| NHS      | 10   | 0.470 0.432 | 312 585 244/55 98 30       | 1141 183  | 1.63     | 0.2013656     | 1  | 0.86   | 0.69          | 1.08          | 0.74   | 0.47          | 1.17          |
| STAGE1-2 | 10   | 0.454 0.428 | 1574 2618 1092/239 399 129 | 5284 767  | 4.12     | 0.0423965     | 1  | 0.89   | 0.80          | 1.00          | 0.80   | 0.64          | 0.99          |
| STAGE2   | 10   | 0.450 0.427 | 1262 2033 848/184 301 99   | 4143 584  | 2.58     | 0.108204      | 1  | 0.90   | 0.79          | 1.02          | 0.81   | 0.63          | 1.05          |
| PBCS1    | 6    | 0.483 0.439 | 138 247 121/57 98 34       | 506 189   | 1.56     | 0.2120286     | 1  | 0.86   | 0.67          | 1.09          | 0.73   | 0.45          | 1.19          |
| PLCO     | 23   | 0.449 0.453 | 298 478 199/22 37 15       | 975 74    | 0.01     | 0.9090132     | 1  | 1.02   | 0.73          | 1.43          | 1.04   | 0.53          | 2.05          |
| WHI      | 10   | 0.443 0.408 | 755 1175 479/99 151 45     | 2409 295  | 2.20     | 0.1381463     | 1  | 0.88   | 0.74          | 1.04          | 0.77   | 0.54          | 1.09          |
| STAGE3   | 22   | 0.445 0.450 | 1109 1730 719/161 251 109  | 3558 521  | 0.06     | 0.8111235     | 1  | 1.02   | 0.89          | 1.16          | 1.03   | 0.79          | 1.34          |
| NHS2     | 2    | 0.440 0.506 | 363 535 227/19 46 20       | 1125 85   | 2.73     | 0.0983533     | 1  | 1.30   | 0.95          | 1.76          | 1.68   | 0.91          | 3.10          |
| PBCS2    | 8    | 0.457 0.432 | 518 863 368/115 156 69     | 1749 340  | 1.27     | 0.2599775     | 1  | 0.91   | 0.77          | 1.07          | 0.83   | 0.59          | 1.15          |
| WHS      | 10   | 0.424 0.464 | 228 332 124/27 49 20       | 684 96    | 0.80     | 0.372286      | 1  | 1.15   | 0.85          | 1.56          | 1.32   | 0.72          | 2.44          |
| PBCS 1+2 | 2    | 0.463 0.436 | 656 1106 488/171 254 103   | 2250 528  | 2.94     | 0.0863643     | 1  | 0.89   | 0.78          | 1.02          | 0.79   | 0.60          | 1.03          |

Locus Alleles Chr Location Neighborhood  
rs7121523 G|A 11p15.4 7556781 PPFIBP2

| SUBSET   | Rank | MAF         | Geno Counts              | Subjects  | score X2 | score p-value | df | het OR | het OR 95% CI | het OR 95% CI | hom OR | hom OR 95% CI | hom OR 95% CI |
|----------|------|-------------|--------------------------|-----------|----------|---------------|----|--------|---------------|---------------|--------|---------------|---------------|
| STAGE1-3 | 11   | 0.156 0.162 | 6264 2378 185/908 352 33 | 8827 1293 | 1.53     | 0.2166686     | 1  | 1.08   | 0.96          | 1.21          | 1.16   | 0.92          | 1.46          |
| NHS      | 20   | 0.159 0.164 | 807 306 28/129 48 6      | 1141 183  | 0.05     | 0.8207057     | 1  | 1.04   | 0.77          | 1.40          | 1.07   | 0.59          | 1.95          |
| STAGE1-2 | 7    | 0.155 0.175 | 3739 1443 99/522 222 23  | 5281 767  | 5.04     | 0.0248352     | 1  | 1.18   | 1.02          | 1.37          | 1.40   | 1.04          | 1.88          |
| STAGE2   | 3    | 0.154 0.178 | 2932 1137 71/393 174 17  | 4140 584  | 6.08     | 0.0136888     | 1  | 1.24   | 1.04          | 1.47          | 1.53   | 1.09          | 2.16          |
| PBCS1    | 17   | 0.138 0.148 | 373 123 8/134 54 1       | 504 189   | 0.13     | 0.7188878     | 1  | 1.07   | 0.75          | 1.52          | 1.14   | 0.56          | 2.30          |
| PLCO     | 1    | 0.156 0.230 | 688 270 17/41 32 1       | 975 74    | 5.55     | 0.0184886     | 1  | 1.67   | 1.08          | 2.57          | 2.78   | 1.17          | 6.58          |
| WHI      | 4    | 0.154 0.186 | 1704 664 40/200 80 15    | 2408 295  | 4.59     | 0.0321699     | 1  | 1.28   | 1.02          | 1.61          | 1.64   | 1.04          | 2.58          |
| STAGE3   | 12   | 0.156 0.143 | 2525 935 85/386 130 10   | 3545 526  | 0.74     | 0.389135      | 1  | 0.92   | 0.76          | 1.11          | 0.85   | 0.59          | 1.23          |
| NHS2     | 19   | 0.167 0.161 | 777 314 30/61 24 2       | 1121 87   | 0.09     | 0.7684207     | 1  | 0.94   | 0.62          | 1.43          | 0.88   | 0.38          | 2.05          |
| PBCS2    | 10   | 0.148 0.136 | 1266 440 38/254 81 6     | 1744 341  | 0.68     | 0.4099651     | 1  | 0.90   | 0.71          | 1.15          | 0.82   | 0.51          | 1.32          |
| WHS      | 16   | 0.158 0.148 | 482 181 17/71 25 2       | 680 98    | 0.16     | 0.6917343     | 1  | 0.92   | 0.60          | 1.40          | 0.84   | 0.36          | 1.96          |

hom OR 95% CI

|          |    |             |                          |          |      |           |   |      |      |      |      |      |      |
|----------|----|-------------|--------------------------|----------|------|-----------|---|------|------|------|------|------|------|
| PBCS1    | 11 | 0.242 0.228 | 291 185 30 115 62 12     | 506 189  | 0.45 | 0.502569  | 1 | 0.91 | 0.68 | 1.20 | 0.82 | 0.47 | 1.45 |
| PLCO     | 6  | 0.238 0.189 | 576 334 65 48 24 2       | 975 74   | 1.88 | 0.1704928 | 1 | 0.75 | 0.49 | 1.15 | 0.56 | 0.24 | 1.32 |
| WHI      | 19 | 0.235 0.224 | 1416 854 139 174 110 11  | 2409 295 | 0.28 | 0.599862  | 1 | 0.95 | 0.77 | 1.16 | 0.90 | 0.59 | 1.35 |
| STAGE3   | 21 | 0.237 0.235 | 2075 1237 218 302 195 25 | 3530 522 | 0.07 | 0.7932455 | 1 | 0.98 | 0.84 | 1.14 | 0.96 | 0.71 | 1.31 |
| NHS2     | 14 | 0.234 0.212 | 664 362 77 52 30 3       | 1103 85  | 0.37 | 0.545089  | 1 | 0.89 | 0.62 | 1.29 | 0.80 | 0.38 | 1.67 |
| PBCS2    | 22 | 0.236 0.234 | 1016 637 94 198 125 17   | 1747 340 | 0.03 | 0.8679555 | 1 | 0.98 | 0.81 | 1.20 | 0.97 | 0.65 | 1.43 |
| WHS      | 17 | 0.244 0.258 | 395 238 47 52 40 5       | 680 97   | 0.13 | 0.7154275 | 1 | 1.07 | 0.76 | 1.50 | 1.14 | 0.57 | 2.25 |
| PBCS 1+2 | 13 | 0.237 0.232 | 1306 819 124 312 187 29  | 2249 528 | 0.16 | 0.6927455 | 1 | 0.97 | 0.82 | 1.14 | 0.94 | 0.68 | 1.29 |

Locus Alleles Chr Location Neighborhood  
rs4415084 C|T 5p12 44698272

| SUBSET   | Rank | MAF         | Geno Counts                | Subjects  | score X2 | score p-value | df | het OR | het OR 95% CI | het OR 95% CI | hom OR | hom OR 95% CI | hom OR 95% CI_u |
|----------|------|-------------|----------------------------|-----------|----------|---------------|----|--------|---------------|---------------|--------|---------------|-----------------|
| STAGE1-3 | 13   | 0.407 0.422 | 3135 4180 1492 434 623 232 | 8807 1289 | 1.18     | 0.2777338     | 1  | 1.05   | 0.96          | 1.14          | 1.10   | 0.93          | 1.30            |
| NHS      | 3    | 0.392 0.448 | 429 513 185 57 87 38       | 1127 182  | 3.83     | 0.0502085     | 1  | 1.25   | 1.00          | 1.55          | 1.55   | 1.00          | 2.41            |
| STAGE1-2 | 17   | 0.401 0.422 | 1895 2517 857 264 358 144  | 5269 766  | 1.39     | 0.2388969     | 1  | 1.07   | 0.96          | 1.19          | 1.14   | 0.92          | 1.42            |
| STAGE2   | 19   | 0.404 0.414 | 1466 2004 672 207 271 106  | 4142 584  | 0.06     | 0.803953      | 1  | 1.02   | 0.89          | 1.15          | 1.03   | 0.80          | 1.33            |
| PBCS1    | 2    | 0.410 0.476 | 174 249 83 55 88 46        | 506 189   | 5.83     | 0.0157429     | 1  | 1.35   | 1.06          | 1.72          | 1.82   | 1.12          | 2.95            |
| PLCO     | 3    | 0.408 0.338 | 339 475 160 28 42 4        | 974 74    | 2.91     | 0.0881889     | 1  | 0.73   | 0.51          | 1.05          | 0.54   | 0.26          | 1.11            |
| WHI      | 23   | 0.400 0.402 | 866 1158 385 111 131 53    | 2409 295  | 0.00     | 0.9690943     | 1  | 1.00   | 0.84          | 1.19          | 0.99   | 0.70          | 1.41            |
| STAGE3   | 19   | 0.415 0.422 | 1240 1666 636 171 265 89   | 3542 525  | 0.12     | 0.7261584     | 1  | 1.02   | 0.90          | 1.17          | 1.05   | 0.81          | 1.36            |
| NHS2     | 21   | 0.402 0.403 | 413 517 193 31 43 14       | 1123 88   | 0.01     | 0.9179916     | 1  | 1.02   | 0.75          | 1.38          | 1.03   | 0.56          | 1.91            |
| PBCS2    | 14   | 0.424 0.413 | 593 833 328 117 165 58     | 1754 340  | 0.17     | 0.6802424     | 1  | 0.97   | 0.82          | 1.14          | 0.93   | 0.67          | 1.30            |
| WHS      | 3    | 0.411 0.469 | 234 316 115 23 57 17       | 665 97    | 3.03     | 0.0815463     | 1  | 1.32   | 0.97          | 1.79          | 1.73   | 0.93          | 3.22            |
| PBCS 1+2 | 6    | 0.421 0.435 | 767 1079 410 171 253 103   | 2256 527  | 0.86     | 0.3527902     | 1  | 1.07   | 0.93          | 1.22          | 1.14   | 0.87          | 1.49            |

Locus Alleles Chr Location Neighborhood  
rs37936 A|G 7q21.11 79806994

| SUBSET   | Rank | MAF         | Geno Counts                | Subjects  | score X2 | score p-value | df | het OR | het OR 95% CI | het OR 95% CI | hom OR | hom OR 95% CI | hom OR 95% CI_u |
|----------|------|-------------|----------------------------|-----------|----------|---------------|----|--------|---------------|---------------|--------|---------------|-----------------|
| STAGE1-3 | 14   | 0.384 0.370 | 3358 3974 1348 513 560 186 | 8680 1259 | 0.91     | 0.3395791     | 1  | 0.96   | 0.88          | 1.05          | 0.92   | 0.77          | 1.09            |
| NHS      | 12   | 0.399 0.369 | 403 541 177 77 68 31       | 1121 176  | 1.25     | 0.2633217     | 1  | 0.88   | 0.69          | 1.11          | 0.77   | 0.48          | 1.22            |
| STAGE1-2 | 14   | 0.400 0.376 | 1731 2149 796 227 246 88   | 4676 561  | 2.64     | 0.1044938     | 1  | 0.90   | 0.79          | 1.02          | 0.81   | 0.63          | 1.04            |
| STAGE2   | 16   | 0.400 0.379 | 1328 1608 619 150 178 57   | 3555 385  | 1.44     | 0.2296102     | 1  | 0.91   | 0.78          | 1.06          | 0.83   | 0.62          | 1.12            |
| PLCO     | 19   | 0.378 0.396 | 379 431 146 26 35 11       | 956 72    | 0.24     | 0.6274624     | 1  | 1.09   | 0.77          | 1.54          | 1.18   | 0.59          | 2.36            |
| WHI      | 13   | 0.409 0.387 | 857 1064 430 111 131 46    | 2351 288  | 0.94     | 0.332011      | 1  | 0.92   | 0.77          | 1.09          | 0.84   | 0.60          | 1.19            |
| STAGE3   | 11   | 0.366 0.382 | 1434 1610 490 203 238 80   | 3534 521  | 0.89     | 0.3444627     | 1  | 1.07   | 0.93          | 1.22          | 1.14   | 0.87          | 1.49            |
| NHS2     | 4    | 0.366 0.419 | 457 508 157 32 36 18       | 1122 86   | 2.17     | 0.1405261     | 1  | 1.26   | 0.93          | 1.73          | 1.60   | 0.86          | 2.98            |
| PBCS2    | 16   | 0.368 0.362 | 706 782 248 134 163 41     | 1736 338  | 0.13     | 0.7201087     | 1  | 0.97   | 0.82          | 1.15          | 0.94   | 0.67          | 1.32            |
| WHS      | 7    | 0.362 0.418 | 271 320 85 37 39 21        | 676 97    | 1.98     | 0.1597983     | 1  | 1.25   | 0.91          | 1.72          | 1.57   | 0.84          | 2.94            |
| PBCS 1+2 | 4    | 0.367 0.347 | 899 997 310 217 239 59     | 2206 515  | 1.00     | 0.3172963     | 1  | 0.93   | 0.81          | 1.07          | 0.86   | 0.65          | 1.15            |

Locus Alleles Chr Location Neighborhood  
rs4666451 G|A 2p24.1 19150424

| SUBSET   | Rank | MAF         | Geno Counts                | Subjects  | score X2 | score p-value | df | het OR | het OR 95% CI | het OR 95% CI | hom OR | hom OR 95% CI | hom OR 95% CI_u |
|----------|------|-------------|----------------------------|-----------|----------|---------------|----|--------|---------------|---------------|--------|---------------|-----------------|
| STAGE1-3 | 15   | 0.395 0.387 | 2822 3643 1205 415 528 164 | 7670 1107 | 0.81     | 0.3686924     | 1  | 0.96   | 0.87          | 1.05          | 0.92   | 0.76          | 1.11            |
| STAGE1-2 | 4    | 0.398 0.363 | 1509 1968 666 236 272 76   | 4143 584  | 6.14     | 0.0132085     | 1  | 0.85   | 0.75          | 0.97          | 0.72   | 0.56          | 0.94            |
| STAGE2   | 4    | 0.398 0.363 | 1509 1968 666 236 272 76   | 4143 584  | 5.88     | 0.0153351     | 1  | 0.85   | 0.75          | 0.97          | 0.72   | 0.56          | 0.94            |
| PBCS1    | 9    | 0.409 0.384 | 176 246 84 67 99 23        | 506 189   | 0.62     | 0.4306197     | 1  | 0.90   | 0.70          | 1.16          | 0.82   | 0.49          | 1.35            |
| PLCO     | 5    | 0.393 0.338 | 355 474 146 30 38 6        | 975 74    | 2.40     | 0.121703      | 1  | 0.75   | 0.52          | 1.08          | 0.57   | 0.27          | 1.18            |
| WHI      | 5    | 0.397 0.351 | 890 1125 394 130 123 42    | 2409 295  | 4.26     | 0.0390439     | 1  | 0.83   | 0.70          | 0.99          | 0.69   | 0.48          | 0.98            |
| STAGE3   | 5    | 0.390 0.413 | 1315 1676 539 179 257 88   | 3530 524  | 1.72     | 0.1892199     | 1  | 1.09   | 0.96          | 1.25          | 1.20   | 0.92          | 1.56            |
| NHS2     | 6    | 0.382 0.436 | 428 504 169 31 35 20       | 1101 86   | 1.80     | 0.1800032     | 1  | 1.23   | 0.91          | 1.68          | 1.52   | 0.82          | 2.82            |
| PBCS2    | 12   | 0.399 0.411 | 621 858 268 111 181 50     | 1747 342  | 0.36     | 0.5493755     | 1  | 1.05   | 0.89          | 1.25          | 1.11   | 0.79          | 1.56            |
| WHS      | 14   | 0.380 0.401 | 266 314 102 37 41 18       | 682 96    | 0.32     | 0.5688034     | 1  | 1.09   | 0.80          | 1.49          | 1.20   | 0.65          | 2.21            |
| PBCS 1+2 | 21   | 0.402 0.401 | 795 1103 352 178 279 73    | 2250 530  | 0.01     | 0.9039051     | 1  | 0.99   | 0.86          | 1.14          | 0.98   | 0.74          | 1.30            |

| Locus      | Alleles | Chr         | Location                 | Neighborhood    |          |               |    |        |               |               |        |               |               |               |               |
|------------|---------|-------------|--------------------------|-----------------|----------|---------------|----|--------|---------------|---------------|--------|---------------|---------------|---------------|---------------|
| rs12622050 | G A     | 2q11.2      |                          | 100945886 NPAS2 |          |               |    |        |               |               |        |               |               |               |               |
| SUBSET     | Rank    | MAF         | Geno Counts              | Subjects        | score X2 | score p-value | df | het OR | het OR 95% CI | het OR 95% CI | hom OR | hom OR 95% CI | hom OR 95% CI | hom OR 95% CI | hom OR 95% CI |
| STAGE1-3   | 16      | 0.225 0.225 | 5271 3090 432 779 439 70 | 8793 1288       | 0.62     | 0.4327301     | 1  | 0.96   | 0.87          | 1.06          | 0.92   | 0.75          | 0.75          | 1.13          |               |
| NHS        | 7       | 0.220 0.191 | 694 392 55 122 52 9      | 1141 183        | 1.82     | 0.1775736     | 1  | 0.83   | 0.62          | 1.09          | 0.68   | 0.39          | 1.19          |               |               |
| STAGE1-2   | 9       | 0.220 0.202 | 3182 1875 227 492 240 35 | 5284 767        | 4.22     | 0.0400652     | 1  | 0.87   | 0.76          | 0.99          | 0.75   | 0.57          | 0.99          |               |               |
| STAGE2     | 11      | 0.220 0.205 | 2488 1483 172 370 188 26 | 4143 584        | 2.54     | 0.1110967     | 1  | 0.88   | 0.75          | 1.03          | 0.77   | 0.56          | 1.06          |               |               |
| PBCS1      | 7       | 0.244 0.222 | 284 197 25 114 66 9      | 506 189         | 0.77     | 0.3801018     | 1  | 0.88   | 0.66          | 1.17          | 0.77   | 0.43          | 1.38          |               |               |
| PLCO       | 10      | 0.229 0.203 | 577 350 48 47 24 3       | 975 74          | 0.70     | 0.4027069     | 1  | 0.84   | 0.55          | 1.27          | 0.70   | 0.30          | 1.62          |               |               |
| WHI        | 14      | 0.213 0.198 | 1476 838 95 192 89 14    | 2409 295        | 0.92     | 0.3369122     | 1  | 0.90   | 0.72          | 1.12          | 0.81   | 0.52          | 1.25          |               |               |
| STAGE3     | 6       | 0.232 0.258 | 2090 1217 205 287 199 35 | 3512 521        | 1.53     | 0.2164965     | 1  | 1.10   | 0.95          | 1.28          | 1.21   | 0.90          | 1.63          |               |               |
| NHS2       | 22      | 0.200 0.204 | 712 332 53 51 27 3       | 1097 81         | 0.01     | 0.9329007     | 1  | 1.02   | 0.69          | 1.50          | 1.03   | 0.48          | 2.25          |               |               |
| PBCS2      | 5       | 0.252 0.278 | 980 644 117 177 141 25   | 1741 343        | 1.96     | 0.1618802     | 1  | 1.14   | 0.95          | 1.37          | 1.30   | 0.90          | 1.87          |               |               |
| WHS        | 24      | 0.231 0.232 | 398 241 35 59 31 7       | 674 97          | 0.00     | 0.9948993     | 1  | 1.00   | 0.70          | 1.43          | 1.00   | 0.49          | 2.05          |               |               |
| PBCS 1+2   | 8       | 0.250 0.258 | 1263 839 142 291 207 34  | 2244 532        | 0.58     | 0.4465536     | 1  | 1.06   | 0.91          | 1.24          | 1.13   | 0.83          | 1.54          |               |               |

| Locus      | Alleles | Chr         | Location                   | Neighborhood        |          |               |    |        |               |               |        |               |               |               |               |
|------------|---------|-------------|----------------------------|---------------------|----------|---------------|----|--------|---------------|---------------|--------|---------------|---------------|---------------|---------------|
| rs11249433 | T C     | 1p11.2      |                            | 120982136 LOC647121 |          |               |    |        |               |               |        |               |               |               |               |
| SUBSET     | Rank    | MAF         | Geno Counts                | Subjects            | score X2 | score p-value | df | het OR | het OR 95% CI | het OR 95% CI | hom OR | hom OR 95% CI | hom OR 95% CI | hom OR 95% CI | hom OR 95% CI |
| STAGE1-3   | 17      | 0.395 0.397 | 3255 4114 1412 474 598 209 | 8781 1281           | 0.52     | 0.4696763     | 1  | 1.03   | 0.95          | 1.12          | 1.06   | 0.90          | 1.26          |               |               |
| NHS        | 14      | 0.388 0.412 | 425 540 170 65 84 33       | 1135 182            | 0.91     | 0.3395834     | 1  | 1.12   | 0.89          | 1.40          | 1.25   | 0.79          | 1.96          |               |               |
| STAGE1-2   | 22      | 0.403 0.402 | 1899 2491 874 270 373 121  | 5264 764            | 0.16     | 0.6879328     | 1  | 1.02   | 0.92          | 1.14          | 1.05   | 0.84          | 1.31          |               |               |
| STAGE2     | 23      | 0.407 0.399 | 1474 1951 704 205 289 88   | 4129 582            | 0.00     | 0.9470428     | 1  | 1.00   | 0.88          | 1.13          | 0.99   | 0.77          | 1.28          |               |               |
| PBCS1      | 15      | 0.387 0.392 | 195 230 81 67 96 26        | 506 189             | 0.15     | 0.6991835     | 1  | 1.05   | 0.82          | 1.34          | 1.10   | 0.67          | 1.81          |               |               |
| PLCO       | 22      | 0.420 0.411 | 324 476 169 26 34 13       | 969 73              | 0.04     | 0.842809      | 1  | 0.97   | 0.68          | 1.37          | 0.93   | 0.47          | 1.87          |               |               |
| WHI        | 20      | 0.407 0.396 | 857 1133 411 105 145 44    | 2401 294            | 0.20     | 0.651227      | 1  | 0.96   | 0.81          | 1.14          | 0.92   | 0.65          | 1.31          |               |               |
| STAGE3     | 17      | 0.383 0.388 | 1360 1625 538 204 225 88   | 3523 517            | 0.37     | 0.5419589     | 1  | 1.04   | 0.91          | 1.19          | 1.09   | 0.83          | 1.42          |               |               |
| NHS2       | 5       | 0.395 0.453 | 418 522 182 27 40 19       | 1122 86             | 1.89     | 0.1689012     | 1  | 1.24   | 0.91          | 1.69          | 1.54   | 0.83          | 2.86          |               |               |
| PBCS2      | 13      | 0.362 0.372 | 719 778 240 137 149 51     | 1737 337            | 0.27     | 0.602281      | 1  | 1.05   | 0.88          | 1.24          | 1.09   | 0.78          | 1.53          |               |               |
| WHS        | 9       | 0.419 0.383 | 223 325 116 40 36 18       | 664 94              | 0.96     | 0.3275381     | 1  | 0.86   | 0.63          | 1.17          | 0.73   | 0.39          | 1.37          |               |               |
| PBCS 1+2   | 10      | 0.368 0.379 | 910 1006 321 204 245 77    | 2237 526            | 0.30     | 0.5847103     | 1  | 1.04   | 0.91          | 1.19          | 1.08   | 0.82          | 1.42          |               |               |

| Locus    | Alleles | Chr         | Location                 | Neighborhood   |          |               |    |        |               |               |        |               |               |               |               |
|----------|---------|-------------|--------------------------|----------------|----------|---------------|----|--------|---------------|---------------|--------|---------------|---------------|---------------|---------------|
| rs724244 | C T     | 3p24.1      |                          | 27217157 NEK10 |          |               |    |        |               |               |        |               |               |               |               |
| SUBSET   | Rank    | MAF         | Geno Counts              | Subjects       | score X2 | score p-value | df | het OR | het OR 95% CI | het OR 95% CI | hom OR | hom OR 95% CI | hom OR 95% CI | hom OR 95% CI | hom OR 95% CI |
| STAGE1-3 | 18      | 0.261 0.267 | 4211 2933 535 597 424 83 | 7679 1104      | 0.47     | 0.4944711     | 1  | 1.04   | 0.94          | 1.15          | 1.07   | 0.88          | 1.32          |               |               |
| STAGE1-2 | 11      | 0.252 0.276 | 2304 1588 250 308 228 47 | 4142 583       | 3.79     | 0.0515821     | 1  | 1.15   | 0.99          | 1.32          | 1.31   | 0.99          | 1.74          |               |               |
| STAGE2   | 6       | 0.252 0.276 | 2304 1588 250 308 228 47 | 4142 583       | 3.55     | 0.059715      | 1  | 1.15   | 0.99          | 1.32          | 1.31   | 0.99          | 1.74          |               |               |
| PBCS1    | 18      | 0.246 0.250 | 293 177 36 106 70 12     | 506 188        | 0.11     | 0.7456457     | 1  | 1.05   | 0.79          | 1.38          | 1.10   | 0.63          | 1.90          |               |               |
| PLCO     | 9       | 0.230 0.257 | 569 364 42 44 22 8       | 975 74         | 0.81     | 0.3694829     | 1  | 1.19   | 0.80          | 1.77          | 1.42   | 0.64          | 3.14          |               |               |
| WHI      | 8       | 0.263 0.295 | 1302 949 158 145 126 24  | 2409 295       | 2.62     | 0.1057963     | 1  | 1.17   | 0.97          | 1.42          | 1.37   | 0.93          | 2.01          |               |               |

hom OR 95% CI



|          |    |             |                          |          |      |           |   |      |      |      |      |      |      |
|----------|----|-------------|--------------------------|----------|------|-----------|---|------|------|------|------|------|------|
| STAGE1-2 | 23 | 0.143 0.143 | 3887 1281 116 569 176 22 | 5284 767 | 0.01 | 0.9400159 | 1 | 0.99 | 0.85 | 1.16 | 0.99 | 0.73 | 1.35 |
| STAGE2   | 20 | 0.140 0.140 | 3069 985 89 442 121 21   | 4143 584 | 0.02 | 0.8956592 | 1 | 0.99 | 0.83 | 1.18 | 0.98 | 0.68 | 1.40 |
| PBCS1    | 12 | 0.153 0.135 | 364 129 13 142 43 4      | 506 189  | 0.35 | 0.5558286 | 1 | 0.90 | 0.64 | 1.27 | 0.81 | 0.41 | 1.61 |
| PLCO     | 11 | 0.132 0.162 | 738 216 21 57 10 7       | 975 74   | 0.67 | 0.4141419 | 1 | 1.20 | 0.77 | 1.87 | 1.44 | 0.59 | 3.49 |
| WHI      | 22 | 0.141 0.137 | 1783 572 54 222 65 8     | 2409 295 | 0.04 | 0.8328894 | 1 | 0.97 | 0.76 | 1.25 | 0.95 | 0.58 | 1.55 |
| STAGE3   | 10 | 0.127 0.115 | 2733 758 72 415 99 11    | 3563 525 | 0.93 | 0.3358854 | 1 | 0.91 | 0.74 | 1.11 | 0.82 | 0.55 | 1.23 |
| NHS2     | 15 | 0.126 0.138 | 869 243 21 67 16 4       | 1133 87  | 0.22 | 0.6411794 | 1 | 1.11 | 0.72 | 1.72 | 1.23 | 0.51 | 2.96 |
| PBCS2    | 2  | 0.124 0.102 | 1344 368 32 276 62 4     | 1744 342 | 2.49 | 0.1142295 | 1 | 0.81 | 0.62 | 1.05 | 0.65 | 0.38 | 1.11 |
| WHS      | 18 | 0.135 0.141 | 520 147 19 72 21 3       | 686 96   | 0.11 | 0.739876  | 1 | 1.07 | 0.70 | 1.64 | 1.15 | 0.50 | 2.68 |
| PBCS 1+2 | 1  | 0.130 0.113 | 1706 494 45 418 104 8    | 2245 530 | 3.04 | 0.0813036 | 1 | 0.83 | 0.67 | 1.02 | 0.69 | 0.45 | 1.05 |

Locus Alleles Chr Location Neighborhood  
rs2067980 A|G 5p12 45018074

| SUBSET   | Rank | MAF         | Geno Counts              | Subjects  | score X2 | score p-value | df | het OR | het OR 95% CI | het OR 95% CI | hom OR | hom OR 95% CI | hom OR 95% CI_u |
|----------|------|-------------|--------------------------|-----------|----------|---------------|----|--------|---------------|---------------|--------|---------------|-----------------|
| STAGE1-3 | 20   | 0.160 0.163 | 6228 2348 240 902 356 32 | 8816 1290 | 0.36     | 0.5466021     | 1  | 0.97   | 0.86          | 1.08          | 0.93   | 0.74          | 1.17            |
| NHS      | 13   | 0.151 0.172 | 814 310 17 125 53 5      | 1141 183  | 1.15     | 0.2838007     | 1  | 1.18   | 0.87          | 1.61          | 1.40   | 0.76          | 2.58            |
| STAGE1-2 | 18   | 0.150 0.170 | 3805 1374 105 530 213 24 | 5284 767  | 1.08     | 0.2979086     | 1  | 1.08   | 0.93          | 1.25          | 1.17   | 0.87          | 1.57            |
| STAGE2   | 18   | 0.150 0.170 | 2991 1064 88 405 160 19  | 4143 584  | 0.38     | 0.5356781     | 1  | 1.05   | 0.89          | 1.25          | 1.11   | 0.79          | 1.56            |
| PBCS1    | 1    | 0.191 0.251 | 335 149 22 107 69 13     | 506 189   | 6.11     | 0.0134493     | 1  | 1.42   | 1.07          | 1.89          | 2.03   | 1.15          | 3.57            |
| PLCO     | 13   | 0.144 0.122 | 714 241 20 57 16 1       | 975 74    | 0.47     | 0.4917397     | 1  | 0.83   | 0.50          | 1.40          | 0.70   | 0.25          | 1.96            |
| WHI      | 17   | 0.143 0.134 | 1761 606 42 221 69 5     | 2409 295  | 0.51     | 0.4772662     | 1  | 0.91   | 0.71          | 1.18          | 0.83   | 0.50          | 1.38            |
| STAGE3   | 1    | 0.176 0.152 | 2423 975 135 372 143 8   | 3533 523  | 4.27     | 0.0387552     | 1  | 0.83   | 0.69          | 0.99          | 0.69   | 0.48          | 0.98            |
| NHS2     | 13   | 0.169 0.149 | 777 292 42 59 25 0       | 1111 84   | 0.45     | 0.5038119     | 1  | 0.86   | 0.56          | 1.33          | 0.75   | 0.32          | 1.76            |
| PBCS2    | 1    | 0.190 0.156 | 1158 519 73 243 93 7     | 1750 343  | 4.11     | 0.0425914     | 1  | 0.80   | 0.64          | 0.99          | 0.63   | 0.41          | 0.99            |
| WHS      | 21   | 0.152 0.141 | 488 164 20 70 25 1       | 672 96    | 0.06     | 0.8117772     | 1  | 0.95   | 0.62          | 1.46          | 0.90   | 0.38          | 2.13            |
| PBCS 1+2 | 20   | 0.190 0.190 | 1493 667 95 350 162 20   | 2255 532  | 0.02     | 0.8892361     | 1  | 0.99   | 0.83          | 1.17          | 0.98   | 0.70          | 1.37            |

Locus Alleles Chr Location Neighborhood  
rs9491859 C|A 6q22.33 128106056 C6orf190

| SUBSET   | Rank | MAF         | Geno Counts                | Subjects  | score X2 | score p-value | df | het OR | het OR 95% CI | het OR 95% CI | hom OR | hom OR 95% CI | hom OR 95% CI_u |
|----------|------|-------------|----------------------------|-----------|----------|---------------|----|--------|---------------|---------------|--------|---------------|-----------------|
| STAGE1-3 | 21   | 0.352 0.357 | 3704 4014 1097 525 602 158 | 8815 1285 | 0.34     | 0.5605864     | 1  | 1.03   | 0.94          | 1.12          | 1.05   | 0.88          | 1.26            |
| NHS      | 8    | 0.356 0.388 | 459 551 130 67 90 26       | 1140 183  | 1.78     | 0.1815687     | 1  | 1.17   | 0.93          | 1.49          | 1.38   | 0.86          | 2.21            |
| STAGE1-2 | 12   | 0.348 0.374 | 2226 2432 625 301 359 107  | 5283 767  | 3.75     | 0.0528488     | 1  | 1.12   | 1.00          | 1.25          | 1.25   | 1.00          | 1.57            |
| STAGE2   | 13   | 0.346 0.369 | 1767 1881 495 234 269 81   | 4143 584  | 2.29     | 0.1302137     | 1  | 1.11   | 0.97          | 1.26          | 1.22   | 0.94          | 1.59            |
| PBCS1    | 19   | 0.345 0.354 | 216 231 59 83 78 28        | 506 189   | 0.09     | 0.758388      | 1  | 1.04   | 0.81          | 1.33          | 1.08   | 0.66          | 1.78            |
| PLCO     | 7    | 0.333 0.378 | 437 427 111 29 34 11       | 975 74    | 1.16     | 0.2811958     | 1  | 1.21   | 0.85          | 1.72          | 1.47   | 0.73          | 2.97            |
| WHI      | 9    | 0.351 0.385 | 1018 1093 298 110 143 42   | 2409 295  | 2.40     | 0.1211551     | 1  | 1.15   | 0.96          | 1.37          | 1.32   | 0.93          | 1.89            |
| STAGE3   | 2    | 0.358 0.333 | 1479 1586 472 224 243 51   | 3537 518  | 1.82     | 0.1769966     | 1  | 0.91   | 0.79          | 1.04          | 0.83   | 0.63          | 1.09            |
| NHS2     | 9    | 0.368 0.335 | 459 501 163 35 39 8        | 1123 82   | 0.62     | 0.4310053     | 1  | 0.88   | 0.63          | 1.22          | 0.77   | 0.40          | 1.48            |
| PBCS2    | 11   | 0.349 0.335 | 744 779 218 146 160 34     | 1741 340  | 0.60     | 0.4398394     | 1  | 0.93   | 0.78          | 1.11          | 0.87   | 0.62          | 1.24            |
| WHS      | 8    | 0.363 0.323 | 276 306 91 43 44 9         | 673 96    | 1.38     | 0.239867      | 1  | 0.82   | 0.60          | 1.14          | 0.68   | 0.35          | 1.30            |
| PBCS 1+2 | 15   | 0.348 0.342 | 959 1006 277 229 238 62    | 2242 529  | 0.15     | 0.6986        | 1  | 0.97   | 0.84          | 1.12          | 0.95   | 0.71          | 1.26            |

hom OR 95% CI

| rs3817198 | T C  | 11p15.5     | 1865582 LSP1              |           |          |               |    |        |               |               |        |               |                 |
|-----------|------|-------------|---------------------------|-----------|----------|---------------|----|--------|---------------|---------------|--------|---------------|-----------------|
| SUBSET    | Rank | MAF         | Geno Counts               | Subjects  | score X2 | score p-value | df | het OR | het OR 95% CI | het OR 95% CI | hom OR | hom OR 95% CI | hom OR 95% CI_u |
| STAGE1-3  | 23   | 0.324 0.323 | 4021 3887 916 582 578 126 | 8824 1286 | 0.00     | 0.9650829     | 1  | 1.00   | 0.91          | 1.09          | 1.00   | 0.83          | 1.19            |
| NHS       | 18   | 0.318 0.308 | 524 509 108 82 88 12      | 1141 182  | 0.14     | 0.7114612     | 1  | 0.95   | 0.75          | 1.22          | 0.91   | 0.56          | 1.49            |
| STAGE1-2  | 20   | 0.325 0.334 | 2407 2311 562 329 359 76  | 5280 764  | 0.74     | 0.3903041     | 1  | 1.05   | 0.94          | 1.18          | 1.11   | 0.88          | 1.40            |
| STAGE2    | 17   | 0.327 0.343 | 1883 1802 454 247 271 64  | 4139 582  | 1.38     | 0.2394505     | 1  | 1.08   | 0.95          | 1.24          | 1.17   | 0.90          | 1.53            |
| PBCS1     | 21   | 0.319 0.321 | 229 228 47 84 86 17       | 504 187   | -        | 0.9987141     | 1  | 1.00   | 0.77          | 1.30          | 1.00   | 0.59          | 1.70            |
| PLCO      | 14   | 0.335 0.365 | 440 417 118 28 38 8       | 975 74    | 0.42     | 0.5158412     | 1  | 1.12   | 0.79          | 1.59          | 1.26   | 0.63          | 2.53            |
| WHI       | 15   | 0.326 0.346 | 1097 1051 260 126 134 35  | 2408 295  | 0.85     | 0.3570046     | 1  | 1.09   | 0.91          | 1.30          | 1.19   | 0.83          | 1.70            |
| STAGE3    | 7    | 0.322 0.308 | 1613 1577 354 252 220 51  | 3544 523  | 1.18     | 0.2767465     | 1  | 0.92   | 0.80          | 1.07          | 0.85   | 0.64          | 1.14            |
| NHS2      | 3    | 0.317 0.259 | 518 491 109 50 29 8       | 1118 87   | 2.52     | 0.1124682     | 1  | 0.75   | 0.53          | 1.07          | 0.56   | 0.28          | 1.15            |
| PBCS2     | 18   | 0.330 0.333 | 789 789 189 154 148 40    | 1767 342  | 0.06     | 0.8139589     | 1  | 1.02   | 0.86          | 1.22          | 1.04   | 0.74          | 1.48            |
| WHS       | 6    | 0.310 0.261 | 306 297 56 48 43 3        | 659 94    | 2.29     | 0.1302792     | 1  | 0.76   | 0.52          | 1.09          | 0.57   | 0.28          | 1.18            |
| PBCS 1+2  | 22   | 0.328 0.327 | 1019 1016 236 239 233 56  | 2271 528  | 0.01     | 0.940136      | 1  | 1.01   | 0.87          | 1.16          | 1.01   | 0.76          | 1.35            |

Locus Alleles Chr Location Neighborhood  
rs7716600 C|A 5p12 44910762

| SUBSET   | Rank | MAF         | Geno Counts              | Subjects  | score X2 | score p-value | df | het OR | het OR 95% CI | het OR 95% CI | hom OR | hom OR 95% CI | hom OR 95% CI_u |
|----------|------|-------------|--------------------------|-----------|----------|---------------|----|--------|---------------|---------------|--------|---------------|-----------------|
| STAGE1-3 | 24   | 0.220 0.220 | 5382 3016 434 787 439 65 | 8832 1291 | 0.00     | 0.9813704     | 1  | 1.00   | 0.90          | 1.10          | 1.00   | 0.82          | 1.22            |
| NHS      | 11   | 0.215 0.246 | 693 401 44 108 60 15     | 1138 183  | 1.58     | 0.2094231     | 1  | 1.18   | 0.91          | 1.54          | 1.40   | 0.83          | 2.37            |
| STAGE1-2 | 21   | 0.216 0.225 | 3227 1822 226 465 259 43 | 5275 767  | 0.29     | 0.5883852     | 1  | 1.04   | 0.91          | 1.18          | 1.08   | 0.83          | 1.40            |
| STAGE2   | 22   | 0.216 0.218 | 2534 1421 182 357 199 28 | 4137 584  | 0.01     | 0.9274837     | 1  | 0.99   | 0.85          | 1.16          | 0.99   | 0.73          | 1.34            |
| PBCS1    | 3    | 0.217 0.272 | 308 173 23 99 77 13      | 504 189   | 4.94     | 0.0262833     | 1  | 1.37   | 1.04          | 1.82          | 1.89   | 1.08          | 3.32            |
| PLCO     | 4    | 0.223 0.169 | 577 359 37 52 19 3       | 973 74    | 2.54     | 0.1108099     | 1  | 0.69   | 0.43          | 1.09          | 0.47   | 0.19          | 1.20            |
| WHI      | 18   | 0.212 0.200 | 1499 797 111 188 96 11   | 2407 295  | 0.47     | 0.4928485     | 1  | 0.93   | 0.75          | 1.15          | 0.86   | 0.56          | 1.32            |
| STAGE3   | 16   | 0.226 0.214 | 2155 1196 208 322 180 22 | 3559 524  | 0.45     | 0.502943      | 1  | 0.95   | 0.81          | 1.11          | 0.90   | 0.66          | 1.23            |
| NHS2     | 8    | 0.229 0.267 | 676 383 66 46 34 6       | 1125 86   | 1.51     | 0.2198068     | 1  | 1.24   | 0.88          | 1.76          | 1.54   | 0.77          | 3.09            |
| PBCS2    | 4    | 0.223 0.195 | 1070 586 98 219 111 11   | 1754 341  | 2.29     | 0.1304574     | 1  | 0.85   | 0.70          | 1.05          | 0.73   | 0.49          | 1.10            |
| WHS      | 22   | 0.232 0.232 | 409 227 44 57 35 5       | 680 97    | 0.04     | 0.8459395     | 1  | 1.04   | 0.73          | 1.47          | 1.07   | 0.53          | 2.16            |
| PBCS 1+2 | 24   | 0.221 0.223 | 1378 757 121 318 188 24  | 2256 530  | 0.00     | 0.947341      | 1  | 1.01   | 0.86          | 1.18          | 1.01   | 0.73          | 1.40            |

adj\_rec Locus Alleles Chr Location Neighborhood  
rs2391406 T|G 13q33.3 106586873

| SUBSET   | Rank | MAF         | Geno Counts                | Subjects  | score X2 | score p-value | df | hom OR | hom OR 95% CI | hom OR 95% CI_u |
|----------|------|-------------|----------------------------|-----------|----------|---------------|----|--------|---------------|-----------------|
| STAGE1-3 | 1    | 0.372 0.360 | 3513 4015 1265 511 627 150 | 8793 1288 | 7.49     | 0.0062159     | 1  | 0.78   | 0.65          | 0.93            |
| NHS      | 14   | 0.371 0.358 | 452 529 159 72 91 20       | 1140 183  | 1.30     | 0.2547189     | 1  | 0.75   | 0.46          | 1.23            |
| STAGE1-2 | 2    | 0.375 0.354 | 2110 2378 788 308 373 85   | 5276 766  | 8.52     | 0.0035035     | 1  | 0.70   | 0.55          | 0.89            |
| STAGE2   | 2    | 0.376 0.353 | 1658 1849 629 236 282 65   | 4136 583  | 7.43     | 0.0064147     | 1  | 0.68   | 0.52          | 0.90            |
| PBCS1    | 15   | 0.387 0.362 | 195 230 81 78 84 26        | 506 188   | 0.20     | 0.6523376     | 1  | 0.89   | 0.55          | 1.45            |

hom OR 95% CI

|          |    |             |                            |          |      |           |   |      |      |      |
|----------|----|-------------|----------------------------|----------|------|-----------|---|------|------|------|
| STAGE1-2 | 1  | 0.436 0.403 | 1716 2524 1042/264 388 115 | 5282 767 | 9.60 | 0.0019472 | 1 | 0.72 | 0.58 | 0.89 |
| STAGE2   | 1  | 0.440 0.393 | 1311 2022 810/210 289 85   | 4143 584 | 8.24 | 0.0040971 | 1 | 0.70 | 0.55 | 0.89 |
| PBCS1    | 2  | 0.415 0.368 | 186 220 100/74 91 24       | 506 189  | 4.31 | 0.0378243 | 1 | 0.60 | 0.37 | 0.98 |
| PLCO     | 12 | 0.419 0.426 | 324 485 166/25 35 14       | 975 74   | 0.38 | 0.5380683 | 1 | 1.21 | 0.66 | 2.24 |
| WHI      | 2  | 0.450 0.403 | 729 1192 488/100 152 43    | 2409 295 | 5.59 | 0.0180128 | 1 | 0.67 | 0.47 | 0.93 |
| STAGE3   | 24 | 0.407 0.407 | 1240 1715 584/182 260 84   | 3539 526 | 0.01 | 0.9032118 | 1 | 0.98 | 0.77 | 1.27 |
| NHS2     | 5  | 0.417 0.482 | 378 542 193/22 43 19       | 1113 84  | 1.87 | 0.171794  | 1 | 1.45 | 0.85 | 2.49 |
| PBCS2    | 15 | 0.400 0.397 | 625 849 274/122 171 51     | 1748 344 | 0.22 | 0.642432  | 1 | 0.93 | 0.67 | 1.28 |
| WHS      | 17 | 0.412 0.378 | 237 324 117/38 46 14       | 678 98   | 0.25 | 0.6195042 | 1 | 0.86 | 0.47 | 1.57 |
| PBCS 1+2 | 1  | 0.403 0.386 | 811 1069 373/196 261 75    | 2253 532 | 2.31 | 0.1286696 | 1 | 0.81 | 0.62 | 1.06 |

Locus Alleles Chr Location Neighborhood  
rs999737 C|T 14q24.1 68104435 RADS1L1

| SUBSET   | Rank | MAF         | Geno Counts              | Subjects  | score X2 | score p-value | df | hom OR | hom OR 95% l | hom OR 95% Cl_u |
|----------|------|-------------|--------------------------|-----------|----------|---------------|----|--------|--------------|-----------------|
| STAGE1-3 | 3    | 0.238 0.228 | 5166 3096 548/760 466 61 | 8810 1287 | 3.84     | 0.0501184     | 1  | 0.76   | 0.58         | 1.00            |
| NHS      | 16   | 0.244 0.239 | 660 405 76/105 67 10     | 1141 182  | 0.45     | 0.5024493     | 1  | 0.79   | 0.40         | 1.57            |
| STAGE1-2 | 7    | 0.239 0.224 | 3092 1862 330/459 271 36 | 5284 766  | 2.95     | 0.0856385     | 1  | 0.73   | 0.51         | 1.05            |
| STAGE2   | 9    | 0.237 0.219 | 2432 1457 254/354 204 26 | 4143 584  | 2.54     | 0.111227      | 1  | 0.71   | 0.47         | 1.08            |
| PBCS1    | 19   | 0.242 0.228 | 291 185 30/115 62 12     | 506 189   | 0.04     | 0.848131      | 1  | 1.07   | 0.53         | 2.16            |
| PLCO     | 6    | 0.238 0.189 | 576 334 65/48 24 2       | 975 74    | 1.62     | 0.2035099     | 1  | 0.40   | 0.10         | 1.71            |
| WHI      | 8    | 0.235 0.224 | 1416 854 139/174 110 11  | 2409 295  | 1.96     | 0.1613558     | 1  | 0.64   | 0.34         | 1.20            |
| STAGE3   | 6    | 0.237 0.235 | 2075 1237 218/302 195 25 | 3530 522  | 1.22     | 0.2698999     | 1  | 0.79   | 0.51         | 1.21            |
| NHS2     | 7    | 0.234 0.212 | 664 362 77/52 30 3       | 1103 85   | 1.43     | 0.2309653     | 1  | 0.49   | 0.15         | 1.60            |
| PBCS2    | 21   | 0.236 0.234 | 1016 637 94/198 125 17   | 1747 340  | 0.10     | 0.7514558     | 1  | 0.92   | 0.54         | 1.56            |
| WHS      | 14   | 0.244 0.258 | 395 238 47/52 40 5       | 680 97    | 0.54     | 0.461692      | 1  | 0.70   | 0.27         | 1.82            |
| PBCS 1+2 | 24   | 0.237 0.232 | 1306 819 124/312 187 29  | 2249 528  | 0.00     | 0.9573692     | 1  | 0.99   | 0.65         | 1.50            |

Locus Alleles Chr Location Neighborhood  
rs1274466 T|C 10p11.21 34510210 PARD3

| SUBSET   | Rank | MAF         | Geno Counts                | Subjects  | score X2 | score p-value | df | hom OR | hom OR 95% l | hom OR 95% Cl_u |
|----------|------|-------------|----------------------------|-----------|----------|---------------|----|--------|--------------|-----------------|
| STAGE1-3 | 4    | 0.451 0.437 | 2683 4344 1810/399 650 238 | 8837 1287 | 3.29     | 0.0695406     | 1  | 0.87   | 0.75         | 1.01            |
| NHS      | 8    | 0.470 0.432 | 312 585 244/55 98 30       | 1141 183  | 2.07     | 0.1498841     | 1  | 0.74   | 0.48         | 1.12            |
| STAGE1-2 | 3    | 0.454 0.428 | 1574 2618 1092/239 399 129 | 5284 767  | 6.82     | 0.0089958     | 1  | 0.76   | 0.62         | 0.94            |
| STAGE2   | 6    | 0.450 0.427 | 1262 2033 848/184 301 99   | 4143 584  | 4.77     | 0.0289226     | 1  | 0.77   | 0.61         | 0.97            |
| PBCS1    | 3    | 0.483 0.439 | 138 247 121/57 98 34       | 506 189   | 2.37     | 0.1239692     | 1  | 0.71   | 0.46         | 1.10            |
| PLCO     | 21   | 0.449 0.453 | 298 478 199/22 37 15       | 975 74    | 0.00     | 0.9860835     | 1  | 0.99   | 0.55         | 1.80            |
| WHI      | 5    | 0.443 0.408 | 755 1175 479/99 151 45     | 2409 295  | 3.27     | 0.0704695     | 1  | 0.74   | 0.53         | 1.03            |
| STAGE3   | 20   | 0.445 0.450 | 1109 1730 719/161 251 109  | 3558 521  | 0.11     | 0.7424725     | 1  | 1.04   | 0.83         | 1.31            |
| NHS2     | 12   | 0.440 0.506 | 363 535 227/19 46 20       | 1125 85   | 0.44     | 0.5048311     | 1  | 1.19   | 0.71         | 2.02            |
| PBCS2    | 22   | 0.457 0.432 | 518 863 368/115 156 69     | 1749 340  | 0.06     | 0.7990951     | 1  | 0.96   | 0.72         | 1.29            |

hom OR 95% l

|          |    |             |                       |          |      |           |   |      |      |       |
|----------|----|-------------|-----------------------|----------|------|-----------|---|------|------|-------|
| NHS2     | 1  | 0.103 0.137 | 905 207 12 65 15 4    | 1124 84  | 7.26 | 0.0070337 | 1 | 4.37 | 1.36 | 14.03 |
| PBCS2    | 16 | 0.104 0.105 | 1412 338 15 273 68 2  | 1765 343 | 0.20 | 0.6515794 | 1 | 0.71 | 0.16 | 3.14  |
| WHS      | 24 | 0.094 0.093 | 556 128 0 79 18 0     | 684 97   | -    |           | 1 | 1.00 | 1.00 | 1.00  |
| PBCS 1+2 | 10 | 0.102 0.103 | 1829 420 21 425 104 3 | 2270 532 | 0.74 | 0.3898034 | 1 | 0.59 | 0.17 | 2.00  |

Locus Alleles Chr Location Neighborhood  
rs3134615 G|T 1p34.2 40134653 TRIT1,MYCL1

| SUBSET   | Rank | MAF         | Geno Counts              | Subjects  | score X2 | score p-value | df | hom OR | hom OR 95% l | hom OR 95% Cl_u |
|----------|------|-------------|--------------------------|-----------|----------|---------------|----|--------|--------------|-----------------|
| STAGE1-3 | 6    | 0.227 0.250 | 5293 3091 463 722 489 77 | 8847 1288 | 2.09     | 0.1483615     | 1  | 1.20   | 0.94         | 1.55            |
| NHS      | 3    | 0.220 0.260 | 689 402 50 101 69 13     | 1141 183  | 3.22     | 0.0729339     | 1  | 1.78   | 0.94         | 3.37            |
| STAGE1-2 | 12   | 0.228 0.256 | 3133 1895 256 420 302 45 | 5284 767  | 2.17     | 0.1407152     | 1  | 1.29   | 0.92         | 1.80            |
| STAGE2   | 17   | 0.230 0.254 | 2444 1493 206 319 233 32 | 4143 584  | 0.50     | 0.4807813     | 1  | 1.15   | 0.78         | 1.71            |
| PBCS1    | 10   | 0.226 0.235 | 299 185 22 106 77 6      | 506 189   | 0.99     | 0.3197854     | 1  | 0.62   | 0.24         | 1.59            |
| PLCO     | 9    | 0.236 0.264 | 578 334 63 38 33 3       | 975 74    | 0.90     | 0.342561      | 1  | 0.57   | 0.17         | 1.87            |
| WHI      | 6    | 0.229 0.264 | 1421 875 113 160 114 21  | 2409 295  | 3.04     | 0.0811318     | 1  | 1.53   | 0.95         | 2.49            |
| STAGE3   | 17   | 0.226 0.241 | 2160 1196 207 302 188 32 | 3563 522  | 0.17     | 0.6803018     | 1  | 1.09   | 0.74         | 1.60            |
| NHS2     | 11   | 0.228 0.229 | 687 372 72 52 24 7       | 1131 83   | 0.47     | 0.4917676     | 1  | 1.33   | 0.59         | 3.00            |
| PBCS2    | 10   | 0.226 0.230 | 1063 591 102 202 124 17  | 1756 343  | 0.43     | 0.5131214     | 1  | 0.84   | 0.49         | 1.42            |
| WHS      | 8    | 0.221 0.292 | 410 233 33 48 40 8       | 676 96    | 1.61     | 0.204437      | 1  | 1.69   | 0.75         | 3.82            |
| PBCS 1+2 | 7    | 0.226 0.232 | 1362 776 124 308 200 23  | 2262 531  | 0.85     | 0.356135      | 1  | 0.81   | 0.51         | 1.28            |

Locus Alleles Chr Location Neighborhood  
rs17570439 T|C 1p34.2 40096797 TRIT1

| SUBSET   | Rank | MAF         | Geno Counts              | Subjects  | score X2 | score p-value | df | hom OR | hom OR 95% l | hom OR 95% Cl_u |
|----------|------|-------------|--------------------------|-----------|----------|---------------|----|--------|--------------|-----------------|
| STAGE1-3 | 7    | 0.208 0.231 | 5507 2905 379 759 465 65 | 8791 1289 | 2.07     | 0.150681      | 1  | 1.22   | 0.93         | 1.61            |
| NHS      | 4    | 0.204 0.238 | 718 381 42 107 65 11     | 1141 183  | 2.59     | 0.1076342     | 1  | 1.75   | 0.88         | 3.49            |
| STAGE1-2 | 8    | 0.208 0.233 | 3285 1798 201 446 283 37 | 5284 766  | 2.62     | 0.1058239     | 1  | 1.34   | 0.93         | 1.94            |
| STAGE2   | 13   | 0.209 0.232 | 2567 1417 159 339 218 26 | 4143 583  | 0.80     | 0.3714442     | 1  | 1.22   | 0.79         | 1.89            |
| PBCS1    | 11   | 0.210 0.214 | 310 179 17 113 71 5      | 506 189   | 0.62     | 0.4301866     | 1  | 0.66   | 0.23         | 1.86            |
| PLCO     | 8    | 0.220 0.243 | 599 323 53 40 32 2       | 975 74    | 1.16     | 0.2815369     | 1  | 0.46   | 0.11         | 1.95            |
| WHI      | 4    | 0.206 0.238 | 1501 825 83 171 106 17   | 2409 294  | 3.88     | 0.0489425     | 1  | 1.71   | 1.00         | 2.93            |
| STAGE3   | 19   | 0.209 0.228 | 2222 1108 178 313 182 28 | 3508 523  | 0.12     | 0.7309937     | 1  | 1.08   | 0.71         | 1.63            |
| NHS2     | 15   | 0.208 0.235 | 694 332 60 51 28 6       | 1086 85   | 0.23     | 0.6290459     | 1  | 1.24   | 0.52         | 2.97            |
| PBCS2    | 23   | 0.208 0.215 | 1111 557 86 211 115 16   | 1754 342  | 0.05     | 0.8240402     | 1  | 0.94   | 0.54         | 1.63            |
| WHS      | 15   | 0.212 0.266 | 417 219 32 51 39 6       | 668 96    | 0.30     | 0.582786      | 1  | 1.29   | 0.52         | 3.20            |
| PBCS 1+2 | 18   | 0.208 0.215 | 1421 735 103 324 186 21  | 2259 531  | 0.22     | 0.6408459     | 1  | 0.89   | 0.55         | 1.45            |

Locus Alleles Chr Location Neighborhood  
rs7121523 G|A 11p15.4 7556781 PPFIBP2

hom OR 95% l

| rs2067980  | A G     | 5p12        | 45018074                 |              |          |               |    |        |               |                 |  |
|------------|---------|-------------|--------------------------|--------------|----------|---------------|----|--------|---------------|-----------------|--|
| SUBSET     | Rank    | MAF         | Geno Counts              | Subjects     | score X2 | score p-value | df | hom OR | hom OR 95% CI | hom OR 95% CI_u |  |
| STAGE1-3   | 9       | 0.160 0.163 | 6228 2348 240 902 356 32 | 8816 1290    | 1.22     | 0.2699405     | 1  | 0.81   | 0.55          | 1.18            |  |
| NHS        | 10      | 0.151 0.172 | 814 310 17 125 53 5      | 1141 183     | 1.55     | 0.2128862     | 1  | 1.89   | 0.68          | 5.25            |  |
| STAGE1-2   | 15      | 0.150 0.170 | 3805 1374 105 530 213 24 | 5284 767     | 1.46     | 0.2263347     | 1  | 1.33   | 0.83          | 2.11            |  |
| STAGE2     | 16      | 0.150 0.170 | 2991 1064 88 405 160 19  | 4143 584     | 0.59     | 0.4432693     | 1  | 1.23   | 0.73          | 2.07            |  |
| PBCS1      | 4       | 0.191 0.251 | 335 149 22 107 69 13     | 506 189      | 2.12     | 0.1450972     | 1  | 1.71   | 0.83          | 3.55            |  |
| PLCO       | 15      | 0.144 0.122 | 714 241 20 57 16 1       | 975 74       | 0.12     | 0.7337198     | 1  | 0.70   | 0.09          | 5.41            |  |
| WHI        | 22      | 0.143 0.134 | 1761 606 42 221 69 5     | 2409 295     | 0.02     | 0.9010911     | 1  | 0.94   | 0.37          | 2.41            |  |
| STAGE3     | 1       | 0.176 0.152 | 2423 975 135 372 143 8   | 3533 523     | 7.13     | 0.0075955     | 1  | 0.39   | 0.19          | 0.80            |  |
| NHS2       | 23      | 0.169 0.149 | 777 292 42 59 25 0       | 1111 84      |          |               |    |        |               |                 |  |
| PBCS2      | 1       | 0.190 0.156 | 1158 519 73 243 93 7     | 1750 343     | 3.28     | 0.0700345     | 1  | 0.49   | 0.22          | 1.08            |  |
| WHS        | 11      | 0.152 0.141 | 488 164 20 70 25 1       | 672 96       | 1.03     | 0.3107539     | 1  | 0.37   | 0.05          | 2.77            |  |
| PBCS 1+2   | 15      | 0.190 0.190 | 1493 667 95 350 162 20   | 2255 532     | 0.26     | 0.6092276     | 1  | 0.88   | 0.53          | 1.44            |  |
| Locus      | Alleles | Chr         | Location                 | Neighborhood |          |               |    |        |               |                 |  |
| rs12608723 | A G     | 19q13.11    |                          | 38508973     |          |               |    |        |               |                 |  |
| SUBSET     | Rank    | MAF         | Geno Counts              | Subjects     | score X2 | score p-value | df | hom OR | hom OR 95% CI | hom OR 95% CI_u |  |
| STAGE1-3   | 10      | 0.136 0.132 | 6618 2036 188 984 274 33 | 8842 1291    | 1.14     | 0.2863558     | 1  | 1.23   | 0.84          | 1.80            |  |
| NHS        | 5       | 0.153 0.156 | 818 296 27 127 55 1      | 1141 183     | 2.58     | 0.1084098     | 1  | 0.22   | 0.03          | 1.66            |  |
| STAGE1-2   | 16      | 0.143 0.143 | 3887 1281 116 569 176 22 | 5284 767     | 1.46     | 0.2271408     | 1  | 1.34   | 0.83          | 2.14            |  |
| STAGE2     | 4       | 0.140 0.140 | 3069 985 89 442 121 21   | 4143 584     | 5.03     | 0.0248684     | 1  | 1.75   | 1.07          | 2.89            |  |
| PBCS1      | 18      | 0.153 0.135 | 364 129 13 142 43 4      | 506 189      | 0.07     | 0.7868473     | 1  | 0.85   | 0.27          | 2.69            |  |
| PLCO       | 1       | 0.132 0.162 | 738 216 21 57 10 7       | 975 74       | 12.05    | 0.000519      | 1  | 4.51   | 1.80          | 11.32           |  |
| WHI        | 19      | 0.141 0.137 | 1783 572 54 222 65 8     | 2409 295     | 0.29     | 0.5923618     | 1  | 1.23   | 0.58          | 2.61            |  |
| STAGE3     | 23      | 0.127 0.115 | 2733 758 72 415 99 11    | 3563 525     | 0.05     | 0.8186121     | 1  | 1.08   | 0.56          | 2.06            |  |
| NHS2       | 4       | 0.126 0.138 | 869 243 21 67 16 4       | 1133 87      | 2.63     | 0.1048297     | 1  | 2.42   | 0.81          | 7.25            |  |
| PBCS2      | 8       | 0.124 0.102 | 1344 368 32 276 62 4     | 1744 342     | 0.65     | 0.4189725     | 1  | 0.65   | 0.23          | 1.86            |  |
| WHS        | 23      | 0.135 0.141 | 520 147 19 72 21 3       | 686 96       | 0.02     | 0.8826785     | 1  | 1.10   | 0.31          | 3.86            |  |
| PBCS 1+2   | 9       | 0.130 0.113 | 1706 494 45 418 104 8    | 2245 530     | 0.79     | 0.37266       | 1  | 0.71   | 0.33          | 1.52            |  |
| Locus      | Alleles | Chr         | Location                 | Neighborhood |          |               |    |        |               |                 |  |
| rs7936636  | C T     | 11p11.2     |                          | 44397546     |          |               |    |        |               |                 |  |
| SUBSET     | Rank    | MAF         | Geno Counts              | Subjects     | score X2 | score p-value | df | hom OR | hom OR 95% CI | hom OR 95% CI_u |  |
| STAGE1-3   | 11      | 0.258 0.234 | 4826 3425 560 759 457 74 | 8811 1290    | 0.58     | 0.4465326     | 1  | 0.91   | 0.70          | 1.17            |  |
| NHS        | 6       | 0.256 0.219 | 634 430 77 110 66 7      | 1141 183     | 2.20     | 0.1377405     | 1  | 0.55   | 0.25          | 1.22            |  |
| STAGE1-2   | 18      | 0.263 0.226 | 2851 2086 344 465 258 44 | 5281 767     | 0.44     | 0.5053074     | 1  | 0.89   | 0.64          | 1.24            |  |

hom OR 95% CI

|          |    |             |                     |          |      |           |   |      |      |       |  |
|----------|----|-------------|---------------------|----------|------|-----------|---|------|------|-------|--|
| STAGE2   | 23 | 0.034 0.022 | 3863 278 2 558 26 0 | 4143 584 |      |           |   |      |      |       |  |
| PBCS1    | 22 | 0.033 0.021 | 473 33 0 181 8 0    | 506 189  | -    | 1         | 1 | 1.00 | 1.00 | 1.00  |  |
| PLCO     | 24 | 0.036 0.020 | 906 68 1 71 3 0     | 975 74   |      |           |   |      |      |       |  |
| WHI      | 24 | 0.034 0.025 | 2245 163 1 280 15 0 | 2409 295 |      |           |   |      |      |       |  |
| STAGE3   | 8  | 0.034 0.028 | 3296 227 8 496 25 2 | 3531 523 | 1.08 | 0.2979503 | 1 | 2.26 | 0.47 | 10.92 |  |
| NHS2     | 24 | 0.039 0.000 | 1029 77 5 84 0 0    | 1111 84  |      |           |   |      |      |       |  |
| PBCS2    | 5  | 0.032 0.033 | 1648 112 1 322 21 1 | 1761 344 | 1.62 | 0.2027334 | 1 | 5.07 | 0.32 | 81.44 |  |
| WHS      | 7  | 0.032 0.032 | 619 38 2 90 4 1     | 659 95   | 1.73 | 0.1881761 | 1 | 4.48 | 0.39 | 51.35 |  |
| PBCS 1+2 | 3  | 0.032 0.029 | 2121 145 1 503 29 1 | 2267 533 | 1.65 | 0.1989004 | 1 | 5.13 | 0.32 | 82.43 |  |

Locus Alleles Chr Location Neighborhood  
rs4415084 C|T 5p12 44698272

| SUBSET   | Rank | MAF         | Geno Counts                | Subjects  | score X2 | score p-value | df | hom OR | hom OR 95% l | hom OR 95% Cl_u |
|----------|------|-------------|----------------------------|-----------|----------|---------------|----|--------|--------------|-----------------|
| STAGE1-3 | 13   | 0.407 0.422 | 3135 4180 1492 434 623 232 | 8807 1289 | 0.46     | 0.4985071     | 1  | 1.05   | 0.90         | 1.23            |
| NHS      | 7    | 0.392 0.448 | 429 513 185 57 87 38       | 1127 182  | 2.09     | 0.1481922     | 1  | 1.34   | 0.90         | 1.98            |
| STAGE1-2 | 14   | 0.401 0.422 | 1895 2517 857 264 358 144  | 5269 766  | 2.12     | 0.1453554     | 1  | 1.16   | 0.95         | 1.42            |
| STAGE2   | 14   | 0.404 0.414 | 1466 2004 672 207 271 106  | 4142 584  | 0.77     | 0.3805767     | 1  | 1.11   | 0.88         | 1.40            |
| PBCS1    | 1    | 0.410 0.476 | 174 249 83 55 88 46        | 506 189   | 6.74     | 0.0094352     | 1  | 1.73   | 1.14         | 2.63            |
| PLCO     | 2    | 0.408 0.338 | 339 475 160 28 42 4        | 974 74    | 6.37     | 0.0116126     | 1  | 0.29   | 0.10         | 0.80            |
| WHI      | 16   | 0.400 0.402 | 866 1158 385 111 131 53    | 2409 295  | 0.60     | 0.4397412     | 1  | 1.13   | 0.82         | 1.56            |
| STAGE3   | 14   | 0.415 0.422 | 1240 1666 636 171 265 89   | 3542 525  | 0.32     | 0.5711418     | 1  | 0.93   | 0.73         | 1.19            |
| NHS2     | 20   | 0.402 0.403 | 413 517 193 31 43 14       | 1123 88   | 0.08     | 0.7775529     | 1  | 0.92   | 0.51         | 1.66            |
| PBCS2    | 12   | 0.424 0.413 | 593 833 328 117 165 58     | 1754 340  | 0.37     | 0.5455683     | 1  | 0.91   | 0.67         | 1.24            |
| WHS      | 22   | 0.411 0.469 | 234 316 115 23 57 17       | 665 97    | 0.04     | 0.8504409     | 1  | 1.06   | 0.60         | 1.86            |
| PBCS 1+2 | 8    | 0.421 0.435 | 767 1079 410 171 253 103   | 2256 527  | 0.81     | 0.3668631     | 1  | 1.12   | 0.88         | 1.43            |

Locus Alleles Chr Location Neighborhood  
rs724244 C|T 3p24.1 27217157 NEK10

| SUBSET   | Rank | MAF         | Geno Counts              | Subjects  | score X2 | score p-value | df | hom OR | hom OR 95% l | hom OR 95% Cl_u |
|----------|------|-------------|--------------------------|-----------|----------|---------------|----|--------|--------------|-----------------|
| STAGE1-3 | 14   | 0.261 0.267 | 4211 2933 535 597 424 83 | 7679 1104 | 0.43     | 0.514089      | 1  | 1.08   | 0.85         | 1.38            |
| STAGE1-2 | 5    | 0.252 0.276 | 2304 1588 250 308 228 47 | 4142 583  | 3.37     | 0.066309      | 1  | 1.34   | 0.96         | 1.87            |
| STAGE2   | 8    | 0.252 0.276 | 2304 1588 250 308 228 47 | 4142 583  | 3.03     | 0.0815691     | 1  | 1.34   | 0.96         | 1.87            |
| PBCS1    | 21   | 0.246 0.250 | 293 177 36 106 70 12     | 506 188   | 0.00     | 0.9486807     | 1  | 0.98   | 0.49         | 1.95            |
| PLCO     | 3    | 0.230 0.257 | 569 364 42 44 22 8       | 975 74    | 6.32     | 0.0119285     | 1  | 2.78   | 1.22         | 6.37            |
| WHI      | 13   | 0.263 0.295 | 1302 949 158 145 126 24  | 2409 295  | 0.81     | 0.3671032     | 1  | 1.23   | 0.78         | 1.93            |
| STAGE3   | 15   | 0.271 0.258 | 1907 1349 285 290 196 37 | 3541 523  | 0.31     | 0.5789882     | 1  | 0.90   | 0.63         | 1.29            |
| NHS2     | 18   | 0.269 0.286 | 611 397 100 45 30 9      | 1108 84   | 0.22     | 0.6359468     | 1  | 1.19   | 0.58         | 2.45            |

hom OR 95% l

PBCS 1+2 5 0.402|0.401 795|1103|352|178|279|73 2250|530 1.24 0.266038 1 0.86 0.65 1.13

Locus Alleles Chr Location Neighborhood  
rs11077820 T|C 17q25.1 71966263 UBE2O,AANAT

| SUBSET   | Rank | MAF         | Geno Counts                | Subjects  | score X2 | score p-value | df | hom OR | hom OR 95% l | hom OR 95% Cl_u |
|----------|------|-------------|----------------------------|-----------|----------|---------------|----|--------|--------------|-----------------|
| STAGE1-3 | 16   | 0.374 0.360 | 3426 4157 1207 533 588 171 | 8790 1292 | 0.37     | 0.5451444     | 1  | 0.95   | 0.80         | 1.13            |
| NHS      | 19   | 0.382 0.374 | 429 553 159 73 83 27       | 1141 183  | 0.03     | 0.8625662     | 1  | 1.04   | 0.67         | 1.62            |
| STAGE1-2 | 19   | 0.383 0.362 | 1953 2611 714 311 356 100  | 5278 767  | 0.40     | 0.527466      | 1  | 0.93   | 0.74         | 1.17            |
| STAGE2   | 15   | 0.383 0.359 | 1524 2058 555 238 273 73   | 4137 584  | 0.67     | 0.4127047     | 1  | 0.89   | 0.68         | 1.17            |
| PBCS1    | 13   | 0.375 0.381 | 193 244 67 74 86 29        | 504 189   | 0.36     | 0.5479968     | 1  | 1.16   | 0.72         | 1.88            |
| PLCO     | 18   | 0.371 0.358 | 371 484 120 30 35 9        | 975 74    | 0.01     | 0.9066518     | 1  | 0.96   | 0.46         | 2.01            |
| WHI      | 9    | 0.385 0.342 | 871 1215 320 124 140 31    | 2406 295  | 1.88     | 0.1706925     | 1  | 0.76   | 0.51         | 1.13            |
| STAGE3   | 18   | 0.361 0.356 | 1473 1545 494 222 232 71   | 3512 525  | 0.12     | 0.7251359     | 1  | 0.95   | 0.73         | 1.25            |
| NHS2     | 13   | 0.364 0.341 | 446 495 150 41 30 14       | 1091 85   | 0.39     | 0.5321502     | 1  | 1.21   | 0.66         | 2.21            |
| PBCS2    | 19   | 0.359 0.366 | 732 784 238 141 153 49     | 1754 343  | 0.13     | 0.7209025     | 1  | 1.06   | 0.76         | 1.48            |
| WHS      | 2    | 0.358 0.335 | 295 266 106 40 49 8        | 667 97    | 4.85     | 0.0276484     | 1  | 0.43   | 0.20         | 0.93            |
| PBCS 1+2 | 11   | 0.362 0.371 | 925 1029 304 215 239 78    | 2258 532  | 0.52     | 0.4707179     | 1  | 1.11   | 0.84         | 1.45            |

Locus Alleles Chr Location Neighborhood  
rs11249433 T|C 1p11.2 120982136 LOC647121

| SUBSET   | Rank | MAF         | Geno Counts                | Subjects  | score X2 | score p-value | df | hom OR | hom OR 95% l | hom OR 95% Cl_u |
|----------|------|-------------|----------------------------|-----------|----------|---------------|----|--------|--------------|-----------------|
| STAGE1-3 | 17   | 0.395 0.397 | 3255 4114 1412 474 598 209 | 8781 1281 | 0.33     | 0.5674177     | 1  | 1.05   | 0.89         | 1.23            |
| NHS      | 12   | 0.388 0.412 | 425 540 170 65 84 33       | 1135 182  | 1.38     | 0.2394518     | 1  | 1.28   | 0.85         | 1.94            |
| STAGE1-2 | 21   | 0.403 0.402 | 1899 2491 874 270 373 121  | 5264 764  | 0.07     | 0.7938192     | 1  | 0.97   | 0.79         | 1.20            |
| STAGE2   | 12   | 0.407 0.399 | 1474 1951 704 205 289 88   | 4129 582  | 0.87     | 0.3511583     | 1  | 0.89   | 0.70         | 1.14            |
| PBCS1    | 14   | 0.387 0.392 | 195 230 81 67 96 26        | 506 189   | 0.32     | 0.5726536     | 1  | 0.87   | 0.53         | 1.42            |
| PLCO     | 19   | 0.420 0.411 | 324 476 169 26 34 13       | 969 73    | 0.01     | 0.9180206     | 1  | 1.03   | 0.55         | 1.94            |
| WHI      | 12   | 0.407 0.396 | 857 1133 411 105 145 44    | 2401 294  | 0.82     | 0.3654987     | 1  | 0.86   | 0.61         | 1.20            |
| STAGE3   | 4    | 0.383 0.388 | 1360 1625 538 204 225 88   | 3523 517  | 1.60     | 0.2061992     | 1  | 1.17   | 0.92         | 1.51            |
| NHS2     | 6    | 0.395 0.453 | 418 522 182 27 40 19       | 1122 86   | 1.67     | 0.1959579     | 1  | 1.42   | 0.83         | 2.43            |
| PBCS2    | 9    | 0.362 0.372 | 719 778 240 137 149 51     | 1737 337  | 0.47     | 0.4931401     | 1  | 1.12   | 0.81         | 1.56            |
| WHS      | 20   | 0.419 0.383 | 223 325 116 40 36 18       | 664 94    | 0.11     | 0.7450198     | 1  | 1.10   | 0.63         | 1.91            |
| PBCS 1+2 | 21   | 0.368 0.379 | 910 1006 321 204 245 77    | 2237 526  | 0.01     | 0.9028431     | 1  | 1.02   | 0.77         | 1.34            |

Locus Alleles Chr Location Neighborhood  
rs3817198 T|C 11p15.5 1865582 LSP1

hom OR 95% l

|          |    |             |                            |           |      |           |   |      |      |      |
|----------|----|-------------|----------------------------|-----------|------|-----------|---|------|------|------|
| STAGE1-3 | 19 | 0.384 0.370 | 3358 3974 1348/513 560 186 | 8680 1259 | 0.08 | 0.7840087 | 1 | 0.98 | 0.83 | 1.16 |
| NHS      | 17 | 0.399 0.369 | 403 541 177/77 68 31       | 1121 176  | 0.35 | 0.552497  | 1 | 1.14 | 0.74 | 1.74 |
| STAGE1-2 | 17 | 0.400 0.376 | 1731 2149 796/227 246 88   | 4676 561  | 0.74 | 0.388436  | 1 | 0.90 | 0.71 | 1.15 |
| STAGE2   | 10 | 0.400 0.379 | 1328 1608 619/150 178 57   | 3555 385  | 1.95 | 0.1625442 | 1 | 0.81 | 0.60 | 1.09 |
| PLCO     | 20 | 0.378 0.396 | 379 431 146/26 35 11       | 956 72    | 0.00 | 0.9607548 | 1 | 1.02 | 0.52 | 2.00 |
| WHI      | 11 | 0.409 0.387 | 857 1064 430/111 131 46    | 2351 288  | 0.86 | 0.3550469 | 1 | 0.85 | 0.61 | 1.19 |
| STAGE3   | 11 | 0.366 0.382 | 1434 1610 490/203 238 80   | 3534 521  | 0.86 | 0.353742  | 1 | 1.13 | 0.87 | 1.47 |
| NHS2     | 3  | 0.366 0.419 | 457 508 157/32 36 18       | 1122 86   | 3.63 | 0.0568456 | 1 | 1.70 | 0.98 | 2.94 |
| PBCS2    | 6  | 0.368 0.362 | 706 782 248/134 163 41     | 1736 338  | 1.36 | 0.2433063 | 1 | 0.81 | 0.57 | 1.15 |
| WHS      | 1  | 0.362 0.418 | 271 320 85/37 39 21        | 676 97    | 6.33 | 0.0118633 | 1 | 2.01 | 1.16 | 3.48 |
| PBCS 1+2 | 2  | 0.367 0.347 | 899 997 310/217 239 59     | 2206 515  | 1.89 | 0.1687396 | 1 | 0.81 | 0.60 | 1.09 |

Locus Alleles Chr Location Neighborhood  
rs12622050 G|A 2q11.2 100945886 NPAS2

| SUBSET   | Rank | MAF         | Geno Counts              | Subjects  | score X2 | score p-value | df | hom OR | hom OR 95% l | hom OR 95% Cl_u |
|----------|------|-------------|--------------------------|-----------|----------|---------------|----|--------|--------------|-----------------|
| STAGE1-3 | 20   | 0.225 0.225 | 5271 3090 432/779 439 70 | 8793 1288 | 0.06     | 0.7994715     | 1  | 1.03   | 0.79         | 1.35            |
| NHS      | 20   | 0.220 0.191 | 694 392 55/122 52 9      | 1141 183  | 0.00     | 0.9698733     | 1  | 0.99   | 0.48         | 2.04            |
| STAGE1-2 | 22   | 0.220 0.202 | 3182 1875 227/492 240 35 | 5284 767  | 0.00     | 0.9889676     | 1  | 1.00   | 0.69         | 1.46            |
| STAGE2   | 22   | 0.220 0.205 | 2488 1483 172/370 188 26 | 4143 584  | 0.00     | 0.9868772     | 1  | 1.00   | 0.65         | 1.55            |
| PBCS1    | 17   | 0.244 0.222 | 284 197 25/114 66 9      | 506 189   | 0.08     | 0.7710003     | 1  | 0.89   | 0.40         | 1.97            |
| PLCO     | 13   | 0.229 0.203 | 577 350 48/47 24 3       | 975 74    | 0.24     | 0.6241386     | 1  | 0.74   | 0.22         | 2.48            |
| WHI      | 18   | 0.213 0.198 | 1476 838 95/192 89 14    | 2409 295  | 0.43     | 0.5130671     | 1  | 1.21   | 0.68         | 2.16            |
| STAGE3   | 16   | 0.232 0.258 | 2090 1217 205/287 199 35 | 3512 521  | 0.22     | 0.6397097     | 1  | 1.09   | 0.75         | 1.59            |
| NHS2     | 17   | 0.200 0.204 | 712 332 53/51 27 3       | 1097 81   | 0.23     | 0.6343338     | 1  | 0.75   | 0.23         | 2.46            |
| PBCS2    | 18   | 0.252 0.278 | 980 644 117/177 141 25   | 1741 343  | 0.15     | 0.7021929     | 1  | 1.09   | 0.70         | 1.71            |
| WHS      | 13   | 0.231 0.232 | 398 241 35/59 31 7       | 674 97    | 0.68     | 0.4096054     | 1  | 1.43   | 0.61         | 3.35            |
| PBCS 1+2 | 22   | 0.250 0.258 | 1263 839 142/291 207 34  | 2244 532  | 0.01     | 0.9063226     | 1  | 1.02   | 0.69         | 1.51            |

Locus Alleles Chr Location Neighborhood  
rs17740709 A|G 12q21.31 81947471 TMTC2

| SUBSET   | Rank | MAF         | Geno Counts              | Subjects  | score X2 | score p-value | df | hom OR | hom OR 95% l | hom OR 95% Cl_u |
|----------|------|-------------|--------------------------|-----------|----------|---------------|----|--------|--------------|-----------------|
| STAGE1-3 | 21   | 0.219 0.210 | 5354 3028 417/811 412 65 | 8799 1288 | 0.05     | 0.8251576     | 1  | 1.03   | 0.79         | 1.35            |
| NHS      | 11   | 0.218 0.180 | 691 402 48/121 58 4      | 1141 183  | 1.50     | 0.2209534     | 1  | 0.53   | 0.19         | 1.49            |
| STAGE1-2 | 11   | 0.218 0.213 | 3200 1869 215/481 246 40 | 5284 767  | 2.20     | 0.1381287     | 1  | 1.31   | 0.92         | 1.86            |
| STAGE2   | 3    | 0.217 0.223 | 2509 1467 167/360 188 36 | 4143 584  | 5.42     | 0.0199301     | 1  | 1.57   | 1.07         | 2.30            |

hom OR 95% l



|          |    |             |                          |          |      |           |   |      |      |      |
|----------|----|-------------|--------------------------|----------|------|-----------|---|------|------|------|
| STAGE3   | 3  | 0.226 0.214 | 2155 1196 208 322 180 22 | 3559 524 | 1.91 | 0.1673266 | 1 | 0.73 | 0.46 | 1.14 |
| NHS2     | 16 | 0.229 0.267 | 676 383 66 46 34 6       | 1125 86  | 0.23 | 0.6295962 | 1 | 1.24 | 0.52 | 2.95 |
| PBCS2    | 2  | 0.223 0.195 | 1070 586 98 219 111 11   | 1754 341 | 3.10 | 0.0785246 | 1 | 0.57 | 0.30 | 1.07 |
| WHS      | 18 | 0.232 0.232 | 409 227 44 57 35 5       | 680 97   | 0.20 | 0.6548932 | 1 | 0.80 | 0.31 | 2.10 |
| PBCS 1+2 | 12 | 0.221 0.223 | 1378 757 121 318 188 24  | 2256 530 | 0.44 | 0.5062432 | 1 | 0.86 | 0.55 | 1.35 |

Locus rs9491859 Alleles C|A Chr 6q22.33 Location 128106056 Neighborhood C6orf190

| SUBSET   | Rank | MAF         | Geno Counts                | Subjects  | score X2 | score p-value | df | hom OR | hom OR 95% l | hom OR 95% CI_u |
|----------|------|-------------|----------------------------|-----------|----------|---------------|----|--------|--------------|-----------------|
| STAGE1-3 | 23   | 0.352 0.357 | 3704 4014 1097 525 602 158 | 8815 1285 | 0.01     | 0.9102678     | 1  | 0.99   | 0.83         | 1.19            |
| NHS      | 13   | 0.356 0.388 | 459 551 130 67 90 26       | 1140 183  | 1.38     | 0.2406068     | 1  | 1.31   | 0.83         | 2.08            |
| STAGE1-2 | 10   | 0.348 0.374 | 2226 2432 625 301 359 107  | 5283 767  | 2.51     | 0.1128823     | 1  | 1.20   | 0.96         | 1.51            |
| STAGE2   | 11   | 0.346 0.369 | 1767 1881 495 234 269 81   | 4143 584  | 1.43     | 0.2315327     | 1  | 1.17   | 0.90         | 1.52            |
| PBCS1    | 9    | 0.345 0.354 | 216 231 59 83 78 28        | 506 189   | 1.02     | 0.3124444     | 1  | 1.29   | 0.79         | 2.12            |
| PLCO     | 10   | 0.333 0.378 | 437 427 111 29 34 11       | 975 74    | 0.86     | 0.3537868     | 1  | 1.38   | 0.70         | 2.74            |
| WHI      | 15   | 0.351 0.385 | 1018 1093 298 110 143 42   | 2409 295  | 0.65     | 0.4190776     | 1  | 1.16   | 0.81         | 1.64            |
| STAGE3   | 2    | 0.358 0.333 | 1479 1586 472 224 243 51   | 3537 518  | 4.22     | 0.040037      | 1  | 0.73   | 0.53         | 0.99            |
| NHS2     | 8    | 0.368 0.335 | 459 501 163 35 39 8        | 1123 82   | 1.43     | 0.2325376     | 1  | 0.64   | 0.30         | 1.35            |
| PBCS2    | 4    | 0.349 0.335 | 744 779 218 146 160 34     | 1741 340  | 1.87     | 0.1714536     | 1  | 0.77   | 0.52         | 1.12            |
| WHS      | 9    | 0.363 0.323 | 276 306 91 43 44 9         | 673 96    | 1.57     | 0.2100875     | 1  | 0.63   | 0.30         | 1.31            |
| PBCS 1+2 | 17   | 0.348 0.342 | 959 1006 277 229 238 62    | 2242 529  | 0.22     | 0.6361298     | 1  | 0.93   | 0.69         | 1.25            |

Locus rs10941679 Alleles A|G Chr 5p12 Location 44742255 Neighborhood

| SUBSET   | Rank | MAF         | Geno Counts              | Subjects | score X2 | score p-value | df | hom OR | hom OR 95% l | hom OR 95% CI_u |
|----------|------|-------------|--------------------------|----------|----------|---------------|----|--------|--------------|-----------------|
| STAGE1-3 | 24   | 0.259 0.264 | 2201 1519 277 378 275 47 | 3997 700 | 0.00     | 0.9646967     | 1  | 0.99   | 0.72         | 1.38            |
| STAGE3   | 10   | 0.259 0.247 | 1945 1325 250 293 197 30 | 3520 520 | 0.94     | 0.3329528     | 1  | 0.82   | 0.56         | 1.22            |
| NHS2     | 9    | 0.256 0.268 | 607 415 73 46 28 8       | 1095 82  | 1.22     | 0.2695034     | 1  | 1.54   | 0.71         | 3.32            |
| PBCS2    | 3    | 0.259 0.235 | 969 667 121 196 130 15   | 1757 341 | 2.56     | 0.1094751     | 1  | 0.64   | 0.37         | 1.11            |
| WHS      | 21   | 0.266 0.273 | 369 243 56 51 39 7       | 668 97   | 0.09     | 0.7608894     | 1  | 0.88   | 0.39         | 2.01            |
| PBCS 1+2 | 19   | 0.259 0.261 | 1225 861 148 281 208 32  | 2234 521 | 0.11     | 0.7414653     | 1  | 0.94   | 0.63         | 1.39            |

**unadj\_geno**

Locus Alleles Chr Location Neighborhood

hom OR 95% l

|          |    |             |                            |           |      |           |   |      |      |      |      |      |      |
|----------|----|-------------|----------------------------|-----------|------|-----------|---|------|------|------|------|------|------|
| STAGE1-3 | 2  | 0.372 0.359 | 3658 4164 1315 521 636 152 | 9137 1309 | 8.58 | 0.0137033 | 2 | 1.07 | 0.95 | 1.21 | 0.81 | 0.67 | 0.98 |
| NHS      | 16 | 0.371 0.358 | 452 529 159 72 91 20       | 1140 183  | 1.44 | 0.4874452 | 2 | 1.08 | 0.77 | 1.51 | 0.79 | 0.47 | 1.34 |
| STAGE1-2 | 3  | 0.374 0.355 | 2234 2499 829 314 380 87   | 5562 781  | 8.82 | 0.0121708 | 2 | 1.08 | 0.92 | 1.27 | 0.75 | 0.58 | 0.96 |
| STAGE2   | 5  | 0.374 0.354 | 1782 1970 670 242 289 67   | 4422 598  | 7.27 | 0.0264436 | 2 | 1.08 | 0.90 | 1.30 | 0.74 | 0.55 | 0.98 |
| CPSII    | 5  | 0.371 0.402 | 217 240 79 12 25 4         | 536 41    | 4.04 | 0.13259   | 2 | 1.88 | 0.92 | 3.84 | 0.92 | 0.29 | 2.92 |
| PBCS1    | 16 | 0.387 0.362 | 195 230 81 78 84 26        | 506 188   | 0.74 | 0.6895158 | 2 | 0.91 | 0.64 | 1.31 | 0.80 | 0.48 | 1.34 |
| PLCO     | 5  | 0.376 0.345 | 398 416 157 29 39 6        | 971 74    | 4.45 | 0.107842  | 2 | 1.29 | 0.78 | 2.12 | 0.52 | 0.21 | 1.29 |
| WHI      | 9  | 0.372 0.344 | 972 1084 353 123 141 31    | 2409 295  | 3.75 | 0.1532398 | 2 | 1.03 | 0.80 | 1.33 | 0.69 | 0.46 | 1.05 |
| STAGE3   | 20 | 0.369 0.365 | 1424 1669 486 207 255 65   | 3579 527  | 0.86 | 0.6497582 | 2 | 1.05 | 0.86 | 1.28 | 0.92 | 0.68 | 1.24 |
| NHS2     | 19 | 0.344 0.348 | 510 503 148 37 42 10       | 1161 89   | 0.54 | 0.7643014 | 2 | 1.15 | 0.73 | 1.82 | 0.93 | 0.45 | 1.92 |
| PBCS2    | 22 | 0.380 0.382 | 656 853 236 126 171 45     | 1745 342  | 0.14 | 0.9303711 | 2 | 1.04 | 0.81 | 1.34 | 0.99 | 0.68 | 1.44 |
| WHS      | 8  | 0.384 0.323 | 258 313 102 44 42 10       | 673 96    | 2.64 | 0.2675711 | 2 | 0.79 | 0.50 | 1.24 | 0.57 | 0.28 | 1.19 |
| PBCS 1+2 | 21 | 0.381 0.375 | 851 1079 317 204 256 71    | 2247 531  | 0.20 | 0.9031173 | 2 | 0.99 | 0.81 | 1.21 | 0.93 | 0.69 | 1.26 |

Locus Alleles Chr Location Neighborhood  
rs998592 G|A 16p13.13 11107179 CLEC16A

| SUBSET   | Rank | MAF         | Geno Counts                | Subjects  | score X2 | score p-value | df | het OR | het OR 95% CI | het OR 95% CI | hom OR | hom OR 95% CI | hom OR 95% CI_u |
|----------|------|-------------|----------------------------|-----------|----------|---------------|----|--------|---------------|---------------|--------|---------------|-----------------|
| STAGE1-3 | 3    | 0.426 0.405 | 3060 4399 1711 452 660 202 | 9170 1314 | 8.38     | 0.015173      | 2  | 1.02   | 0.89          | 1.15          | 0.80   | 0.67          | 0.95            |
| NHS      | 3    | 0.424 0.434 | 405 502 232 54 99 30       | 1139 183  | 6.40     | 0.0406753     | 2  | 1.48   | 1.04          | 2.11          | 0.97   | 0.60          | 1.56            |
| STAGE1-2 | 2    | 0.438 0.402 | 1803 2653 1117 270 396 117 | 5573 783  | 11.42    | 0.0033168     | 2  | 1.00   | 0.84          | 1.18          | 0.70   | 0.56          | 0.88            |
| STAGE2   | 2    | 0.442 0.393 | 1398 2151 885 216 297 87   | 4434 600  | 11.56    | 0.0030906     | 2  | 0.89   | 0.74          | 1.08          | 0.64   | 0.49          | 0.83            |
| CPSII    | 6    | 0.475 0.369 | 158 254 131 17 19 6        | 543 42    | 3.32     | 0.1902589     | 2  | 0.70   | 0.35          | 1.38          | 0.43   | 0.16          | 1.11            |
| PBCS1    | 4    | 0.415 0.368 | 186 220 100 74 91 24       | 506 189   | 4.73     | 0.0939266     | 2  | 1.04   | 0.72          | 1.50          | 0.60   | 0.36          | 1.02            |
| PLCO     | 18   | 0.419 0.426 | 324 485 166 25 35 14       | 975 74    | 0.23     | 0.890015      | 2  | 0.94   | 0.55          | 1.59          | 1.09   | 0.55          | 2.16            |
| WHI      | 4    | 0.450 0.403 | 730 1192 488 100 152 43    | 2410 295  | 5.65     | 0.0593396     | 2  | 0.93   | 0.71          | 1.22          | 0.64   | 0.44          | 0.94            |
| STAGE3   | 21   | 0.408 0.409 | 1257 1746 595 182 265 85   | 3598 532  | 0.32     | 0.8541338     | 2  | 1.05   | 0.86          | 1.28          | 0.99   | 0.75          | 1.30            |
| NHS2     | 5    | 0.418 0.483 | 394 568 202 22 47 19       | 1164 88   | 3.11     | 0.2107337     | 2  | 1.48   | 0.88          | 2.50          | 1.68   | 0.89          | 3.18            |
| PBCS2    | 21   | 0.400 0.397 | 625 849 274 122 171 51     | 1748 344  | 0.22     | 0.8972547     | 2  | 1.03   | 0.80          | 1.33          | 0.95   | 0.67          | 1.36            |
| WHS      | 19   | 0.413 0.385 | 238 329 119 38 47 15       | 686 100   | 0.57     | 0.7518467     | 2  | 0.89   | 0.57          | 1.42          | 0.79   | 0.42          | 1.49            |
| PBCS 1+2 | 7    | 0.403 0.386 | 811 1069 373 196 261 75    | 2253 532  | 1.94     | 0.3798854     | 2  | 1.01   | 0.82          | 1.24          | 0.83   | 0.62          | 1.12            |

Locus Alleles Chr Location Neighborhood  
rs7936636 C|T 11p11.2 44397546

hom OR 95% CI

|          |    |             |                          |          |      |           |   |      |      |      |      |      |       |
|----------|----|-------------|--------------------------|----------|------|-----------|---|------|------|------|------|------|-------|
| STAGE2   | 11 | 0.208 0.233 | 2754 1514 166 346 227 26 | 4434 599 | 4.26 | 0.1188903 | 2 | 1.19 | 1.00 | 1.43 | 1.25 | 0.81 | 1.91  |
| CPSII    | 7  | 0.196 0.262 | 343 187 13 22 18 2       | 543 42   | 2.37 | 0.3060685 | 2 | 1.50 | 0.79 | 2.87 | 2.40 | 0.51 | 11.30 |
| PBCS1    | 19 | 0.210 0.214 | 310 179 17 113 71 5      | 506 189  | 0.45 | 0.7966889 | 2 | 1.09 | 0.77 | 1.54 | 0.81 | 0.29 | 2.24  |
| PLCO     | 7  | 0.220 0.243 | 599 323 53 40 32 2       | 975 74   | 3.67 | 0.1592414 | 2 | 1.48 | 0.91 | 2.41 | 0.57 | 0.13 | 2.40  |
| WHI      | 5  | 0.206 0.238 | 1502 825 83 171 106 17   | 2410 294 | 4.86 | 0.088043  | 2 | 1.13 | 0.87 | 1.46 | 1.80 | 1.04 | 3.10  |
| STAGE3   | 5  | 0.208 0.227 | 2260 1126 180 316 184 28 | 3566 528 | 2.51 | 0.2853715 | 2 | 1.17 | 0.96 | 1.42 | 1.11 | 0.73 | 1.69  |
| NHS2     | 14 | 0.206 0.236 | 730 346 61 53 30 6       | 1137 89  | 0.86 | 0.6521169 | 2 | 1.19 | 0.75 | 1.90 | 1.35 | 0.56 | 3.28  |
| PBCS2    | 17 | 0.208 0.215 | 1111 557 86 211 115 16   | 1754 342 | 0.46 | 0.7927244 | 2 | 1.09 | 0.85 | 1.39 | 0.98 | 0.56 | 1.70  |
| WHS      | 9  | 0.214 0.263 | 419 223 33 52 39 6       | 675 97   | 2.56 | 0.277619  | 2 | 1.41 | 0.90 | 2.20 | 1.47 | 0.59 | 3.66  |
| PBCS 1+2 | 9  | 0.208 0.215 | 1421 735 103 324 186 21  | 2259 531 | 1.41 | 0.4948072 | 2 | 1.11 | 0.91 | 1.36 | 0.89 | 0.55 | 1.45  |

Locus Alleles Chr Location Neighborhood  
rs13134615 G|T 1p34.2 40134653 TRIT1,MYCL1

| SUBSET   | Rank | MAF         | Geno Counts              | Subjects  | score X2 | score p-value | df | het OR | het OR 95% CI | het OR 95% CI | hom OR | hom OR 95% CI | hom OR 95% CI_u |
|----------|------|-------------|--------------------------|-----------|----------|---------------|----|--------|---------------|---------------|--------|---------------|-----------------|
| STAGE1-3 | 6    | 0.226 0.249 | 5514 3211 475 734 499 77 | 9200 1310 | 7.36     | 0.0252172     | 2  | 1.17   | 1.03          | 1.32          | 1.22   | 0.95          | 1.57            |
| NHS      | 7    | 0.220 0.260 | 689 402 50 101 69 13     | 1141 183  | 3.44     | 0.1791253     | 2  | 1.17   | 0.84          | 1.63          | 1.77   | 0.93          | 3.38            |
| STAGE1-2 | 6    | 0.227 0.255 | 3314 1996 265 428 310 45 | 5575 783  | 6.78     | 0.0337796     | 2  | 1.20   | 1.03          | 1.41          | 1.31   | 0.94          | 1.83            |
| STAGE2   | 9    | 0.228 0.254 | 2625 1594 215 327 241 32 | 4434 600  | 4.82     | 0.0896638     | 2  | 1.21   | 1.02          | 1.45          | 1.19   | 0.81          | 1.76            |
| CPSII    | 17   | 0.215 0.250 | 326 200 17 23 17 2       | 543 42    | 0.64     | 0.7258853     | 2  | 1.20   | 0.63          | 2.31          | 1.67   | 0.36          | 7.66            |
| PBCS1    | 12   | 0.226 0.235 | 299 185 22 106 77 6      | 506 189   | 1.32     | 0.5165559     | 2  | 1.17   | 0.83          | 1.66          | 0.77   | 0.30          | 1.95            |
| PLCO     | 8    | 0.236 0.264 | 578 334 63 38 33 3       | 975 74    | 3.47     | 0.1762729     | 2  | 1.50   | 0.92          | 2.44          | 0.72   | 0.22          | 2.41            |
| WHI      | 6    | 0.228 0.264 | 1422 875 113 160 114 21  | 2410 295  | 4.55     | 0.1029877     | 2  | 1.16   | 0.90          | 1.49          | 1.65   | 1.01          | 2.71            |
| STAGE3   | 14   | 0.226 0.241 | 2200 1215 210 306 190 32 | 3625 528  | 1.46     | 0.4825217     | 2  | 1.12   | 0.93          | 1.37          | 1.10   | 0.74          | 1.62            |
| NHS2     | 15   | 0.225 0.230 | 724 388 73 54 26 7       | 1185 87   | 0.67     | 0.7138838     | 2  | 0.90   | 0.55          | 1.46          | 1.29   | 0.56          | 2.93            |
| PBCS2    | 14   | 0.226 0.230 | 1063 591 102 202 124 17  | 1756 343  | 1.02     | 0.6002165     | 2  | 1.10   | 0.86          | 1.41          | 0.88   | 0.51          | 1.50            |
| WHS      | 5    | 0.224 0.286 | 413 236 35 50 40 8       | 684 98    | 3.68     | 0.1585788     | 2  | 1.40   | 0.90          | 2.19          | 1.89   | 0.83          | 4.30            |
| PBCS 1+2 | 1    | 0.226 0.232 | 1362 776 124 308 200 23  | 2262 531  | 2.82     | 0.2440696     | 2  | 1.14   | 0.93          | 1.39          | 0.82   | 0.52          | 1.30            |

Locus Alleles Chr Location Neighborhood  
rs10850145 C|T 12q24.13 112428512

| SUBSET   | Rank | MAF         | Geno Counts              | Subjects  | score X2 | score p-value | df | het OR | het OR 95% CI | het OR 95% CI | hom OR | hom OR 95% CI | hom OR 95% CI_u |
|----------|------|-------------|--------------------------|-----------|----------|---------------|----|--------|---------------|---------------|--------|---------------|-----------------|
| STAGE1-3 | 7    | 0.094 0.108 | 7550 1579 79 1047 249 17 | 9208 1313 | 5.30     | 0.0707265     | 2  | 1.14   | 0.98          | 1.32          | 1.55   | 0.92          | 2.63            |

hom OR 95% CI

|          |    |             |                          |          |      |           |   |      |      |      |      |      |      |
|----------|----|-------------|--------------------------|----------|------|-----------|---|------|------|------|------|------|------|
| PLCO     | 14 | 0.214 0.209 | 603 326 46 48 21 5       | 975 74   | 1.22 | 0.5431086 | 2 | 0.81 | 0.48 | 1.38 | 1.37 | 0.52 | 3.60 |
| WHI      | 8  | 0.215 0.212 | 1467 851 92 187 91 17    | 2410 295 | 4.24 | 0.1197552 | 2 | 0.84 | 0.64 | 1.09 | 1.45 | 0.85 | 2.49 |
| STAGE3   | 16 | 0.223 0.207 | 2185 1184 205 334 168 25 | 3574 527 | 1.40 | 0.4967904 | 2 | 0.93 | 0.76 | 1.13 | 0.80 | 0.52 | 1.23 |
| NHS2     | 20 | 0.211 0.206 | 723 368 59 55 25 5       | 1150 85  | 0.30 | 0.8627148 | 2 | 0.89 | 0.55 | 1.46 | 1.11 | 0.43 | 2.89 |
| PBCS2    | 12 | 0.234 0.212 | 1042 597 112 215 109 18  | 1751 342 | 1.55 | 0.4612495 | 2 | 0.88 | 0.69 | 1.14 | 0.78 | 0.46 | 1.31 |
| WHS      | 11 | 0.213 0.190 | 420 219 34 64 34 2       | 673 100  | 1.83 | 0.3998655 | 2 | 1.02 | 0.65 | 1.59 | 0.39 | 0.09 | 1.65 |
| PBCS 1+2 | 15 | 0.236 0.227 | 1324 799 133 321 179 31  | 2256 531 | 0.59 | 0.7460987 | 2 | 0.92 | 0.75 | 1.13 | 0.96 | 0.64 | 1.45 |

Locus Alleles Chr Location Neighborhood  
rs999737 C|T 14q24.1 68104435 RAD51L1

| SUBSET   | Rank | MAF         | Geno Counts              | Subjects  | score X2 | score p-value | df | het OR | het OR 95% CI | het OR 95% CI | hom OR | hom OR 95% CI | hom OR 95% CI_u |
|----------|------|-------------|--------------------------|-----------|----------|---------------|----|--------|---------------|---------------|--------|---------------|-----------------|
| STAGE1-3 | 9    | 0.237 0.229 | 5374 3222 563 773 472 64 | 9159 1309 | 3.30     | 0.1916886     | 2  | 1.02   | 0.90          | 1.15          | 0.79   | 0.60          | 1.03            |
| NHS      | 20   | 0.244 0.239 | 660 405 76 105 67 10     | 1141 182  | 0.41     | 0.8164741     | 2  | 1.04   | 0.75          | 1.45          | 0.83   | 0.41          | 1.65            |
| STAGE1-2 | 20   | 0.238 0.224 | 3263 1971 341 469 275 38 | 5575 782  | 2.07     | 0.3553768     | 2  | 0.97   | 0.83          | 1.14          | 0.78   | 0.55          | 1.10            |
| STAGE2   | 20   | 0.236 0.220 | 2603 1566 265 364 208 28 | 4434 600  | 1.97     | 0.3741095     | 2  | 0.95   | 0.79          | 1.14          | 0.76   | 0.50          | 1.13            |
| CPSII    | 13   | 0.235 0.214 | 319 193 31 27 12 3       | 543 42    | 0.88     | 0.6437795     | 2  | 0.73   | 0.36          | 1.48          | 1.14   | 0.33          | 3.98            |
| PBCS1    | 15   | 0.242 0.228 | 291 185 30 115 62 12     | 506 189   | 0.85     | 0.6540959     | 2  | 0.85   | 0.59          | 1.22          | 1.01   | 0.50          | 2.05            |
| PLCO     | 11   | 0.238 0.189 | 576 334 65 48 24 2       | 975 74    | 2.15     | 0.3418996     | 2  | 0.86   | 0.52          | 1.43          | 0.37   | 0.09          | 1.55            |
| WHI      | 14   | 0.235 0.224 | 1417 854 139 174 110 11  | 2410 295  | 2.22     | 0.328767      | 2  | 1.05   | 0.81          | 1.35          | 0.64   | 0.34          | 1.21            |
| STAGE3   | 8    | 0.237 0.236 | 2112 1254 222 305 197 26 | 3588 528  | 2.04     | 0.3604606     | 2  | 1.09   | 0.90          | 1.32          | 0.81   | 0.53          | 1.24            |
| NHS2     | 10   | 0.232 0.208 | 698 374 81 55 31 3       | 1153 89   | 1.80     | 0.4069142     | 2  | 1.05   | 0.67          | 1.66          | 0.47   | 0.14          | 1.54            |
| PBCS2    | 24   | 0.236 0.234 | 1016 637 94 198 125 17   | 1747 340  | 0.08     | 0.9584114     | 2  | 1.01   | 0.79          | 1.29          | 0.93   | 0.54          | 1.59            |
| WHS      | 14   | 0.245 0.268 | 398 243 47 52 41 6       | 688 99    | 1.40     | 0.4975595     | 2  | 1.29   | 0.83          | 2.00          | 0.98   | 0.40          | 2.40            |
| PBCS 1+2 | 22   | 0.237 0.232 | 1306 819 124 312 187 29  | 2249 528  | 0.19     | 0.9072264     | 2  | 0.96   | 0.78          | 1.17          | 0.98   | 0.64          | 1.49            |

Locus Alleles Chr Location Neighborhood  
rs1274466 T|C 10p11.21 34510210 PARD3

| SUBSET   | Rank | MAF         | Geno Counts                | Subjects  | score X2 | score p-value | df | het OR | het OR 95% CI | het OR 95% CI | hom OR | hom OR 95% CI | hom OR 95% CI_u |
|----------|------|-------------|----------------------------|-----------|----------|---------------|----|--------|---------------|---------------|--------|---------------|-----------------|
| STAGE1-3 | 10   | 0.452 0.436 | 2783 4512 1894 411 654 244 | 9189 1309 | 2.82     | 0.2436431     | 2  | 0.98   | 0.86          | 1.12          | 0.87   | 0.74          | 1.03            |
| NHS      | 12   | 0.470 0.432 | 312 585 244 55 98 30       | 1141 183  | 2.48     | 0.2900363     | 2  | 0.95   | 0.66          | 1.36          | 0.70   | 0.43          | 1.12            |
| STAGE1-2 | 7    | 0.456 0.427 | 1656 2756 1163 248 402 133 | 5575 783  | 6.45     | 0.0397809     | 2  | 0.97   | 0.82          | 1.15          | 0.76   | 0.61          | 0.96            |

hom OR 95% CI

|          |    |             |                       |          |      |           |   |      |      |      |      |      |      |
|----------|----|-------------|-----------------------|----------|------|-----------|---|------|------|------|------|------|------|
| NHS2     | 4  | 0.127 0.132 | 907 259 21 71 16 4    | 1187 91  | 3.71 | 0.1561105 | 2 | 0.79 | 0.45 | 1.38 | 2.43 | 0.81 | 7.28 |
| PBCS2    | 6  | 0.124 0.102 | 1344 368 32 276 62 4  | 1744 342 | 2.45 | 0.2943695 | 2 | 0.82 | 0.61 | 1.11 | 0.61 | 0.21 | 1.74 |
| WHS      | 23 | 0.135 0.143 | 527 147 20 73 22 3    | 694 98   | 0.10 | 0.9522342 | 2 | 1.08 | 0.65 | 1.80 | 1.08 | 0.31 | 3.73 |
| PBCS 1+2 | 5  | 0.130 0.113 | 1706 494 45 418 104 8 | 2245 530 | 2.14 | 0.3425759 | 2 | 0.86 | 0.68 | 1.09 | 0.73 | 0.34 | 1.55 |

Locus Alleles Chr Location Neighborhood  
rs4415084 C|T 5p12 44698272

| SUBSET   | Rank | MAF         | Geno Counts                | Subjects  | score X2 | score p-value | df | het OR | het OR 95% CI | het OR 95% CI | hom OR | hom OR 95% CI | hom OR 95% CI_u |
|----------|------|-------------|----------------------------|-----------|----------|---------------|----|--------|---------------|---------------|--------|---------------|-----------------|
| STAGE1-3 | 12   | 0.408 0.423 | 3249 4351 1557 439 636 236 | 9157 1311 | 2.20     | 0.3325225     | 2  | 1.08   | 0.95          | 1.23          | 1.12   | 0.95          | 1.33            |
| NHS      | 5    | 0.392 0.448 | 429 513 185 57 87 38       | 1127 182  | 3.93     | 0.1400014     | 2  | 1.28   | 0.89          | 1.83          | 1.55   | 0.99          | 2.41            |
| STAGE1-2 | 16   | 0.403 0.424 | 1986 2660 913 267 367 148  | 5559 782  | 3.17     | 0.2049934     | 2  | 1.03   | 0.87          | 1.21          | 1.21   | 0.97          | 1.50            |
| STAGE2   | 21   | 0.406 0.417 | 1557 2147 728 210 280 110  | 4432 600  | 1.50     | 0.4717114     | 2  | 0.97   | 0.80          | 1.17          | 1.12   | 0.88          | 1.43            |
| CPSII    | 18   | 0.427 0.393 | 178 265 99 16 19 7         | 542 42    | 0.49     | 0.7843172     | 2  | 0.80   | 0.40          | 1.59          | 0.79   | 0.31          | 1.98            |
| PBCS1    | 1    | 0.410 0.476 | 174 249 83 55 88 46        | 506 189   | 6.03     | 0.0489301     | 2  | 1.12   | 0.76          | 1.65          | 1.75   | 1.09          | 2.81            |
| PLCO     | 4    | 0.408 0.338 | 339 475 160 28 42 4        | 974 74    | 6.41     | 0.0405753     | 2  | 1.07   | 0.65          | 1.76          | 0.30   | 0.10          | 0.88            |
| WHI      | 15   | 0.400 0.402 | 866 1158 386 111 131 53    | 2410 295  | 1.56     | 0.4592812     | 2  | 0.88   | 0.68          | 1.15          | 1.07   | 0.76          | 1.52            |
| STAGE3   | 7    | 0.414 0.421 | 1263 1694 645 173 269 89   | 3602 531  | 2.45     | 0.2941151     | 2  | 1.16   | 0.95          | 1.42          | 1.01   | 0.77          | 1.32            |
| NHS2     | 16   | 0.399 0.402 | 436 540 199 32 46 14       | 1175 92   | 0.58     | 0.7497147     | 2  | 1.16   | 0.73          | 1.85          | 0.96   | 0.50          | 1.84            |
| PBCS2    | 16   | 0.424 0.413 | 593 833 328 117 165 58     | 1754 340  | 0.51     | 0.7744736     | 2  | 1.00   | 0.77          | 1.30          | 0.90   | 0.64          | 1.26            |
| WHS      | 2    | 0.414 0.465 | 234 321 118 24 58 17       | 673 99    | 4.95     | 0.0840442     | 2  | 1.76   | 1.06          | 2.92          | 1.40   | 0.73          | 2.72            |
| PBCS 1+2 | 13   | 0.421 0.435 | 767 1079 410 171 253 103   | 2256 527  | 0.74     | 0.6896753     | 2  | 1.05   | 0.85          | 1.30          | 1.13   | 0.86          | 1.48            |

Locus Alleles Chr Location Neighborhood  
rs7121523 G|A 11p15.4 7556781 PPFIBP2

| SUBSET   | Rank | MAF         | Geno Counts              | Subjects  | score X2 | score p-value | df | het OR | het OR 95% CI | het OR 95% CI | hom OR | hom OR 95% CI | hom OR 95% CI_u |
|----------|------|-------------|--------------------------|-----------|----------|---------------|----|--------|---------------|---------------|--------|---------------|-----------------|
| STAGE1-3 | 13   | 0.156 0.162 | 6502 2482 193 925 353 36 | 9177 1314 | 2.18     | 0.335893      | 2  | 1.00   | 0.88          | 1.14          | 1.31   | 0.91          | 1.88            |
| NHS      | 19   | 0.159 0.164 | 807 306 28 129 48 6      | 1141 183  | 0.44     | 0.8027624     | 2  | 0.98   | 0.69          | 1.40          | 1.34   | 0.54          | 3.30            |
| STAGE1-2 | 4    | 0.156 0.176 | 3940 1525 106 533 223 26 | 5571 782  | 7.64     | 0.0219197     | 2  | 1.08   | 0.91          | 1.28          | 1.81   | 1.17          | 2.81            |
| STAGE2   | 3    | 0.155 0.179 | 3133 1219 78 404 175 20  | 4430 599  | 8.10     | 0.0174351     | 2  | 1.11   | 0.92          | 1.35          | 1.99   | 1.20          | 3.29            |
| CPSII    | 3    | 0.173 0.183 | 368 161 13 29 9 3        | 542 41    | 4.19     | 0.1230197     | 2  | 0.71   | 0.33          | 1.53          | 2.93   | 0.79          | 10.86           |

hom OR 95% CI

|            |         |             |                            |              |          |               |    |        |               |               |        |               |                 |
|------------|---------|-------------|----------------------------|--------------|----------|---------------|----|--------|---------------|---------------|--------|---------------|-----------------|
| PBCS 1+2   | 17      | 0.362 0.371 | 925 1029 304 215 239 78    | 2258 532     | 0.52     | 0.7697705     | 2  | 1.00   | 0.81          | 1.23          | 1.10   | 0.83          | 1.47            |
| Locus      | Alleles | Chr         | Location                   | Neighborhood |          |               |    |        |               |               |        |               |                 |
| rs37936    | A G     | 7q21.11     |                            | 79806994     |          |               |    |        |               |               |        |               |                 |
| SUBSET     | Rank    | MAF         | Geno Counts                | Subjects     | score X2 | score p-value | df | het OR | het OR 95% CI | het OR 95% CI | hom OR | hom OR 95% CI | hom OR 95% CI_u |
| STAGE1-3   | 15      | 0.384 0.370 | 3487 4138 1398 521 572 187 | 9023 1280    | 2.13     | 0.3452229     | 2  | 0.93   | 0.81          | 1.05          | 0.90   | 0.75          | 1.07            |
| NHS        | 4       | 0.399 0.369 | 403 541 177 77 68 31       | 1121 176     | 5.82     | 0.0545566     | 2  | 0.66   | 0.46          | 0.93          | 0.92   | 0.58          | 1.44            |
| STAGE1-2   | 19      | 0.398 0.374 | 1839 2287 832 233 255 88   | 4958 576     | 2.64     | 0.2665316     | 2  | 0.88   | 0.73          | 1.06          | 0.83   | 0.64          | 1.08            |
| STAGE2     | 17      | 0.398 0.376 | 1436 1746 655 156 187 57   | 3837 400     | 2.08     | 0.3539259     | 2  | 0.99   | 0.79          | 1.23          | 0.80   | 0.58          | 1.10            |
| CPSII      | 23      | 0.387 0.263 | 199 251 79 19 21 0         | 529 40       |          |               |    |        |               |               |        |               |                 |
| PLCO       | 17      | 0.378 0.396 | 379 431 146 26 35 11       | 956 72       | 0.40     | 0.8203862     | 2  | 1.18   | 0.70          | 2.00          | 1.10   | 0.53          | 2.28            |
| WHI        | 17      | 0.409 0.387 | 858 1064 430 111 131 46    | 2352 288     | 1.06     | 0.5885608     | 2  | 0.95   | 0.73          | 1.24          | 0.83   | 0.58          | 1.19            |
| STAGE3     | 19      | 0.368 0.382 | 1455 1636 504 205 241 81   | 3595 527     | 0.88     | 0.6445903     | 2  | 1.05   | 0.86          | 1.28          | 1.14   | 0.87          | 1.50            |
| NHS2       | 7       | 0.371 0.422 | 475 529 171 33 38 19       | 1175 90      | 2.83     | 0.2424538     | 2  | 1.03   | 0.64          | 1.68          | 1.60   | 0.89          | 2.89            |
| PBCS2      | 11      | 0.368 0.362 | 706 782 248 134 163 41     | 1736 338     | 1.64     | 0.4395709     | 2  | 1.10   | 0.86          | 1.41          | 0.87   | 0.60          | 1.27            |
| WHS        | 1       | 0.362 0.414 | 274 325 85 38 40 21        | 684 99       | 5.93     | 0.0515765     | 2  | 0.89   | 0.55          | 1.42          | 1.78   | 0.99          | 3.20            |
| PBCS 1+2   | 4       | 0.367 0.347 | 899 997 310 217 239 59     | 2206 515     | 2.41     | 0.3003864     | 2  | 0.99   | 0.81          | 1.22          | 0.79   | 0.58          | 1.08            |
| Locus      | Alleles | Chr         | Location                   | Neighborhood |          |               |    |        |               |               |        |               |                 |
| rs12622050 | G A     | 2q11.2      |                            | 100945886    | NPAS2    |               |    |        |               |               |        |               |                 |
| SUBSET     | Rank    | MAF         | Geno Counts                | Subjects     | score X2 | score p-value | df | het OR | het OR 95% CI | het OR 95% CI | hom OR | hom OR 95% CI | hom OR 95% CI_u |
| STAGE1-3   | 16      | 0.225 0.223 | 5470 3225 447 795 444 70   | 9142 1309    | 1.24     | 0.5375306     | 2  | 0.95   | 0.84          | 1.07          | 1.08   | 0.83          | 1.40            |
| NHS        | 11      | 0.220 0.191 | 694 392 55 122 52 9        | 1141 183     | 2.54     | 0.2813551     | 2  | 0.75   | 0.53          | 1.07          | 0.93   | 0.45          | 1.93            |
| STAGE1-2   | 9       | 0.220 0.200 | 3355 1980 239 504 243 35   | 5574 782     | 5.99     | 0.0501569     | 2  | 0.82   | 0.69          | 0.96          | 0.97   | 0.68          | 1.41            |
| STAGE2     | 13      | 0.221 0.203 | 2661 1588 184 382 191 26   | 4433 599     | 3.58     | 0.1667838     | 2  | 0.84   | 0.70          | 1.01          | 0.98   | 0.64          | 1.50            |
| CPSII      | 21      | 0.217 0.146 | 323 203 16 29 12 0         | 542 41       |          |               |    |        |               |               |        |               |                 |
| PBCS1      | 14      | 0.244 0.222 | 284 197 25 114 66 9        | 506 189      | 1.02     | 0.6015807     | 2  | 0.83   | 0.59          | 1.19          | 0.90   | 0.41          | 1.98            |
| PLCO       | 16      | 0.229 0.203 | 577 350 48 47 24 3         | 975 74       | 0.56     | 0.7574316     | 2  | 0.84   | 0.51          | 1.40          | 0.77   | 0.23          | 2.56            |
| WHI        | 13      | 0.213 0.198 | 1477 838 95 192 89 14      | 2410 295     | 2.66     | 0.2644077     | 2  | 0.82   | 0.63          | 1.07          | 1.13   | 0.63          | 2.03            |

hom OR 95% CI

| SUBSET   | Rank | MAF         | Geno Counts                | Subjects  | score X2 | score p-value | df | het OR | het OR 95% CI | het OR 95% CI | hom OR | hom OR 95% CI | hom OR 95% CI_u |
|----------|------|-------------|----------------------------|-----------|----------|---------------|----|--------|---------------|---------------|--------|---------------|-----------------|
| STAGE1-3 | 18   | 0.394 0.385 | 2956 3804 1260/428 533 168 | 8020 1129 | 0.74     | 0.6895684     | 2  | 0.97   | 0.84          | 1.11          | 0.92   | 0.76          | 1.11            |
| STAGE1-2 | 10   | 0.397 0.361 | 1622 2102 710/245 277 78   | 4434 600  | 5.81     | 0.0546737     | 2  | 0.87   | 0.73          | 1.05          | 0.73   | 0.56          | 0.95            |
| STAGE2   | 7    | 0.397 0.361 | 1622 2102 710/245 277 78   | 4434 600  | 5.81     | 0.0546737     | 2  | 0.87   | 0.73          | 1.05          | 0.73   | 0.56          | 0.95            |
| CPSII    | 15   | 0.394 0.369 | 201 256 86/18 17 7         | 543 42    | 0.74     | 0.6894743     | 2  | 0.74   | 0.37          | 1.48          | 0.91   | 0.37          | 2.26            |
| PBCS1    | 8    | 0.409 0.384 | 176 246 84/67 99 23        | 506 189   | 2.17     | 0.3386605     | 2  | 1.06   | 0.73          | 1.52          | 0.72   | 0.42          | 1.23            |
| PLCO     | 10   | 0.393 0.338 | 355 474 146/30 38 6        | 975 74    | 2.66     | 0.2640763     | 2  | 0.95   | 0.58          | 1.56          | 0.49   | 0.20          | 1.19            |
| WHI      | 3    | 0.397 0.351 | 890 1126 394/130 123 42    | 2410 295  | 5.72     | 0.0573547     | 2  | 0.75   | 0.58          | 0.97          | 0.73   | 0.51          | 1.05            |
| STAGE3   | 9    | 0.390 0.412 | 1336 1703 550/183 257 90   | 3589 530  | 1.83     | 0.4002932     | 2  | 1.10   | 0.90          | 1.35          | 1.19   | 0.91          | 1.57            |
| NHS2     | 2    | 0.384 0.439 | 446 528 178/33 35 22       | 1152 90   | 5.17     | 0.0753395     | 2  | 0.90   | 0.55          | 1.47          | 1.67   | 0.95          | 2.94            |
| PBCS2    | 9    | 0.399 0.411 | 621 858 268/111 181 50     | 1747 342  | 1.71     | 0.4247607     | 2  | 1.18   | 0.91          | 1.53          | 1.04   | 0.73          | 1.50            |
| WHS      | 18   | 0.380 0.393 | 269 317 104/39 41 18       | 690 98    | 0.93     | 0.626732      | 2  | 0.89   | 0.56          | 1.42          | 1.19   | 0.65          | 2.18            |
| PBCS 1+2 | 3    | 0.402 0.401 | 795 1103 352/178 279 73    | 2250 530  | 2.49     | 0.2883643     | 2  | 1.13   | 0.92          | 1.39          | 0.93   | 0.69          | 1.25            |

Locus Alleles Chr Location Neighborhood  
rs2067980 A|G 5p12 45018074

| SUBSET   | Rank | MAF         | Geno Counts              | Subjects  | score X2 | score p-value | df | het OR | het OR 95% CI | het OR 95% CI | hom OR | hom OR 95% CI | hom OR 95% CI_u |
|----------|------|-------------|--------------------------|-----------|----------|---------------|----|--------|---------------|---------------|--------|---------------|-----------------|
| STAGE1-3 | 19   | 0.161 0.164 | 6467 2446 251/915 363 34 | 9164 1312 | 0.61     | 0.7365229     | 2  | 1.05   | 0.92          | 1.19          | 0.96   | 0.66          | 1.38            |
| NHS      | 14   | 0.151 0.172 | 814 310 17/125 53 5      | 1141 183  | 1.85     | 0.3956473     | 2  | 1.11   | 0.79          | 1.58          | 1.92   | 0.69          | 5.28            |
| STAGE1-2 | 5    | 0.151 0.173 | 4007 1454 114/538 219 26 | 5575 783  | 6.97     | 0.0307022     | 2  | 1.12   | 0.95          | 1.33          | 1.70   | 1.10          | 2.63            |
| STAGE2   | 8    | 0.151 0.173 | 3193 1144 97/413 166 21  | 4434 600  | 5.34     | 0.0694085     | 2  | 1.12   | 0.93          | 1.36          | 1.67   | 1.03          | 2.71            |
| CPSII    | 12   | 0.159 0.190 | 383 147 13/28 12 2       | 543 42    | 0.97     | 0.616419      | 2  | 1.12   | 0.55          | 2.25          | 2.10   | 0.45          | 9.79            |
| PBCS1    | 2    | 0.191 0.251 | 335 149 22/107 69 13     | 506 189   | 5.93     | 0.0516211     | 2  | 1.45   | 1.01          | 2.08          | 1.85   | 0.90          | 3.80            |
| PLCO     | 15   | 0.144 0.122 | 714 241 20/57 16 1       | 975 74    | 0.57     | 0.7511381     | 2  | 0.83   | 0.47          | 1.48          | 0.63   | 0.08          | 4.75            |
| WHI      | 22   | 0.143 0.134 | 1761 607 42/221 69 5     | 2410 295  | 0.47     | 0.7925099     | 2  | 0.91   | 0.68          | 1.21          | 0.95   | 0.37          | 2.42            |
| STAGE3   | 1    | 0.176 0.151 | 2460 993 137/377 144 8   | 3590 529  | 7.49     | 0.0236639     | 2  | 0.95   | 0.77          | 1.16          | 0.38   | 0.19          | 0.78            |
| NHS2     | 23   | 0.170 0.148 | 810 306 44/62 26 0       | 1160 88   |          |               |    |        |               |               |        |               |                 |
| PBCS2    | 1    | 0.190 0.156 | 1158 519 73/243 93 7     | 1750 343  | 4.98     | 0.0830531     | 2  | 0.85   | 0.66          | 1.11          | 0.46   | 0.21          | 1.00            |

hom OR 95% CI

|          |    |             |                          |          |      |           |   |      |      |      |      |      |      |
|----------|----|-------------|--------------------------|----------|------|-----------|---|------|------|------|------|------|------|
| STAGE2   | 10 | 0.252 0.277 | 2473 1688 272 316 234 49 | 4433 599 | 4.47 | 0.1071336 | 2 | 1.08 | 0.91 | 1.30 | 1.41 | 1.02 | 1.95 |
| CPSII    | 8  | 0.247 0.310 | 309 198 35 21 16 5       | 542 42   | 2.05 | 0.3581283 | 2 | 1.19 | 0.61 | 2.33 | 2.10 | 0.75 | 5.92 |
| PBCS1    | 20 | 0.246 0.250 | 293 177 36 106 70 12     | 506 188  | 0.36 | 0.8365396 | 2 | 1.09 | 0.77 | 1.56 | 0.92 | 0.46 | 1.84 |
| PLCO     | 3  | 0.230 0.257 | 569 364 42 44 22 8       | 975 74   | 7.20 | 0.0273587 | 2 | 0.78 | 0.46 | 1.33 | 2.46 | 1.09 | 5.57 |
| WHI      | 12 | 0.263 0.295 | 1302 949 159 145 126 24  | 2410 295 | 2.82 | 0.244056  | 2 | 1.19 | 0.93 | 1.54 | 1.36 | 0.85 | 2.15 |
| STAGE3   | 18 | 0.271 0.257 | 1940 1371 290 294 198 37 | 3601 529 | 0.95 | 0.6216378 | 2 | 0.95 | 0.79 | 1.16 | 0.84 | 0.59 | 1.21 |
| NHS2     | 22 | 0.270 0.278 | 638 417 105 48 31 9      | 1160 88  | 0.14 | 0.933018  | 2 | 0.99 | 0.62 | 1.58 | 1.14 | 0.54 | 2.39 |
| PBCS2    | 4  | 0.273 0.244 | 926 696 131 198 121 23   | 1753 342 | 2.96 | 0.2275448 | 2 | 0.81 | 0.64 | 1.04 | 0.82 | 0.51 | 1.31 |
| WHS      | 7  | 0.266 0.283 | 376 258 54 48 46 5       | 688 99   | 3.32 | 0.1905755 | 2 | 1.40 | 0.90 | 2.16 | 0.73 | 0.28 | 1.90 |
| PBCS 1+2 | 6  | 0.267 0.245 | 1219 869 167 303 191 34  | 2255 528 | 2.05 | 0.3593652 | 2 | 0.88 | 0.72 | 1.08 | 0.82 | 0.55 | 1.21 |

Locus Alleles Chr Location Neighborhood  
rs10941679 A|G 5p12 44742255

| SUBSET   | Rank | MAF         | Geno Counts              | Subjects | score X2 | score p-value | df | het OR | het OR 95% CI | het OR 95% CI | hom OR | hom OR 95% CI | hom OR 95% CI_u |
|----------|------|-------------|--------------------------|----------|----------|---------------|----|--------|---------------|---------------|--------|---------------|-----------------|
| STAGE1-3 | 22   | 0.259 0.262 | 2233 1539 281 383 276 47 | 4053 706 | 0.34     | 0.8424114     | 2  | 1.05   | 0.88          | 1.24          | 0.98   | 0.70          | 1.35            |
| STAGE3   | 15   | 0.259 0.245 | 1977 1345 254 298 198 30 | 3576 526 | 1.45     | 0.4837916     | 2  | 0.98   | 0.81          | 1.18          | 0.78   | 0.53          | 1.17            |
| NHS2     | 12   | 0.255 0.262 | 637 430 76 49 29 8       | 1143 86  | 1.17     | 0.5566541     | 2  | 0.88   | 0.55          | 1.41          | 1.37   | 0.62          | 3.00            |
| PBCS2    | 3    | 0.259 0.235 | 969 667 121 196 130 15   | 1757 341 | 3.01     | 0.2223184     | 2  | 0.96   | 0.76          | 1.23          | 0.61   | 0.35          | 1.07            |
| WHS      | 20   | 0.268 0.268 | 371 248 57 53 39 7       | 676 99   | 0.39     | 0.821471      | 2  | 1.10   | 0.71          | 1.72          | 0.86   | 0.37          | 1.98            |
| PBCS 1+2 | 19   | 0.259 0.261 | 1225 861 148 281 208 32  | 2234 521 | 0.42     | 0.8100147     | 2  | 1.05   | 0.86          | 1.29          | 0.94   | 0.63          | 1.41            |

Locus Alleles Chr Location Neighborhood  
rs11249433 T|C 1p11.2 120982136 LOC647121

| SUBSET   | Rank | MAF         | Geno Counts                | Subjects  | score X2 | score p-value | df | het OR | het OR 95% CI | het OR 95% CI | hom OR | hom OR 95% CI | hom OR 95% CI_u |
|----------|------|-------------|----------------------------|-----------|----------|---------------|----|--------|---------------|---------------|--------|---------------|-----------------|
| STAGE1-3 | 23   | 0.395 0.399 | 3394 4265 1474 478 610 215 | 9133 1303 | 0.17     | 0.9207136     | 2  | 1.02   | 0.89          | 1.15          | 1.04   | 0.87          | 1.23            |
| NHS      | 17   | 0.388 0.412 | 425 540 170 65 84 33       | 1135 182  | 1.21     | 0.5472985     | 2  | 1.02   | 0.72          | 1.44          | 1.27   | 0.81          | 2.00            |
| STAGE1-2 | 22   | 0.401 0.407 | 2022 2614 919 271 383 126  | 5555 780  | 1.19     | 0.5525688     | 2  | 1.09   | 0.93          | 1.29          | 1.02   | 0.82          | 1.28            |

hom OR 95% CI



unadj\_trend

Locus Alleles Chr Location Neighborhood  
rs11249433 T|C 1p11.2 120982136 LOC647121

| SUBSET   | Rank | MAF         | Geno Counts                | Subjects  | score X2 | score p-value | df | het OR | het OR 95% CI | het OR 95% CI | hom OR | hom OR 95% CI | hom OR 95% CI_u |
|----------|------|-------------|----------------------------|-----------|----------|---------------|----|--------|---------------|---------------|--------|---------------|-----------------|
| STAGE1-3 | 1    | 0.399 0.439 | 478 610 215 1655 2556 1017 | 1303 5228 | 13.39    | 2.53E-04      | 1  | 1.18   | 1.08          | 1.28          | 1.38   | 1.16          | 1.65            |
| NHS      | 3    | 0.412 0.448 | 65 84 33 238 411 155       | 182 804   | 1.61     | 0.2038633     | 1  | 1.16   | 0.92          | 1.47          | 1.35   | 0.85          | 2.16            |
| STAGE1-2 | 1    | 0.407 0.441 | 271 383 126 1124 1831 695  | 780 3650  | 6.21     | 0.0126829     | 1  | 1.15   | 1.03          | 1.29          | 1.33   | 1.06          | 1.66            |
| STAGE2   | 1    | 0.406 0.439 | 206 299 93 886 1420 540    | 598 2846  | 4.65     | 0.03114       | 1  | 1.15   | 1.01          | 1.31          | 1.32   | 1.03          | 1.71            |
| CPSII    | 1    | 0.524 0.405 | 8 24 10 108 159 48         | 42 315    | 4.56     | 0.0327818     | 1  | 0.60   | 0.37          | 0.96          | 0.36   | 0.14          | 0.93            |
| PBCS1    | 9    | 0.392 0.407 | 67 96 26 124 171 58        | 189 353   | 0.24     | 0.6271678     | 1  | 1.07   | 0.82          | 1.38          | 1.14   | 0.68          | 1.91            |
| PLCO     | 15   | 0.411 0.427 | 26 34 13 140 232 75        | 73 447    | 0.14     | 0.7046061     | 1  | 1.07   | 0.75          | 1.54          | 1.15   | 0.56          | 2.38            |
| WHI      | 1    | 0.396 0.455 | 105 145 44 514 858 359     | 294 1731  | 7.09     | 0.0077679     | 1  | 1.27   | 1.07          | 1.52          | 1.62   | 1.14          | 2.32            |
| STAGE3   | 1    | 0.387 0.434 | 207 227 89 531 725 322     | 523 1578  | 6.52     | 0.0106382     | 1  | 1.20   | 1.04          | 1.38          | 1.43   | 1.09          | 1.89            |
| NHS2     | 18   | 0.450 0.440 | 29 41 20 114 152 73        | 90 339    | 0.06     | 0.8094536     | 1  | 0.96   | 0.70          | 1.32          | 0.93   | 0.49          | 1.74            |
| PBCS2    | 6    | 0.372 0.410 | 137 149 51 246 324 121     | 337 691   | 2.51     | 0.1129798     | 1  | 1.16   | 0.96          | 1.40          | 1.35   | 0.93          | 1.96            |
| WHS      | 3    | 0.380 0.461 | 41 37 18 171 249 128       | 96 548    | 3.89     | 0.0486311     | 1  | 1.35   | 1.00          | 1.83          | 1.83   | 1.00          | 3.34            |
| PBCS 1+2 | 2    | 0.379 0.409 | 204 245 77 370 495 179     | 526 1044  | 2.45     | 0.1172055     | 1  | 1.13   | 0.97          | 1.31          | 1.27   | 0.94          | 1.72            |

Locus Alleles Chr Location Neighborhood  
rs7716600 C|A 5p12 44910762

| SUBSET   | Rank | MAF         | Geno Counts              | Subjects  | score X2 | score p-value | df | het OR | het OR 95% CI | het OR 95% CI | hom OR | hom OR 95% CI | hom OR 95% CI_u |
|----------|------|-------------|--------------------------|-----------|----------|---------------|----|--------|---------------|---------------|--------|---------------|-----------------|
| STAGE1-3 | 2    | 0.221 0.243 | 800 446 67 3042 1901 333 | 1313 5276 | 5.69     | 0.0170562     | 1  | 1.13   | 1.02          | 1.25          | 1.28   | 1.04          | 1.57            |
| NHS      | 14   | 0.246 0.253 | 108 60 15 451 303 53     | 183 807   | 0.09     | 0.768301      | 1  | 1.04   | 0.80          | 1.35          | 1.08   | 0.64          | 1.82            |
| STAGE1-2 | 3    | 0.227 0.249 | 473 265 45 2095 1316 253 | 783 3664  | 3.24     | 0.0720145     | 1  | 1.12   | 0.99          | 1.28          | 1.26   | 0.98          | 1.63            |
| STAGE2   | 3    | 0.221 0.247 | 365 205 30 1644 1013 200 | 600 2857  | 3.63     | 0.0568978     | 1  | 1.15   | 1.00          | 1.33          | 1.33   | 0.99          | 1.78            |

hom OR 95% CI

| rs12622050 | G A     | 2q11.2      | 100945886 NPAS2          |              |          |               |    |        |               |               |        |               |                 |                 |  |
|------------|---------|-------------|--------------------------|--------------|----------|---------------|----|--------|---------------|---------------|--------|---------------|-----------------|-----------------|--|
| SUBSET     | Rank    | MAF         | Geno Counts              | Subjects     | score X2 | score p-value | df | het OR | het OR 95% CI | het OR 95% CI | hom OR | hom OR 95% CI | hom OR 95% CI   | hom OR 95% CI_u |  |
| STAGE1-3   | 4       | 0.223 0.208 | 795 444 70 3307 1695 246 | 1309 5248    | 2.66     | 0.1027384     | 1  | 0.92   | 0.83          | 1.02          | 0.84   | 0.69          | 1.03            |                 |  |
| NHS        | 19      | 0.191 0.189 | 122 52 9 529 251 27      | 183 807      | 0.01     | 0.9198816     | 1  | 0.99   | 0.74          | 1.31          | 0.97   | 0.55          | 1.73            |                 |  |
| STAGE1-2   | 23      | 0.200 0.200 | 504 243 35 2361 1141 162 | 782 3664     | 0.00     | 0.9851776     | 1  | 1.00   | 0.87          | 1.14          | 1.00   | 0.76          | 1.31            |                 |  |
| STAGE2     | 23      | 0.203 0.203 | 382 191 26 1832 890 135  | 599 2857     | 0.00     | 0.9894318     | 1  | 1.00   | 0.86          | 1.17          | 1.00   | 0.74          | 1.36            |                 |  |
| CPSII      | 5       | 0.146 0.213 | 29 12 0 201 94 20        | 41 315       | 1.80     | 0.1792826     | 1  | 1.53   | 0.82          | 2.84          | 2.33   | 0.67          | 8.08            |                 |  |
| PBCS1      | 5       | 0.222 0.249 | 114 66 9 204 121 27      | 189 352      | 0.89     | 0.344647      | 1  | 1.15   | 0.86          | 1.54          | 1.32   | 0.74          | 2.36            |                 |  |
| PLCO       | 20      | 0.203 0.195 | 47 24 3 288 145 15       | 74 448       | 0.05     | 0.8317723     | 1  | 0.95   | 0.61          | 1.48          | 0.91   | 0.38          | 2.19            |                 |  |
| WHI        | 18      | 0.198 0.194 | 192 89 14 1139 530 73    | 295 1742     | 0.06     | 0.8111826     | 1  | 0.97   | 0.79          | 1.21          | 0.95   | 0.62          | 1.46            |                 |  |
| STAGE3     | 4       | 0.257 0.227 | 291 201 35 947 555 83    | 527 1585     | 3.86     | 0.049454      | 1  | 0.85   | 0.72          | 1.00          | 0.72   | 0.52          | 1.00            |                 |  |
| NHS2       | 17      | 0.206 0.215 | 53 29 3 210 117 15       | 85 342       | 0.07     | 0.7949841     | 1  | 1.06   | 0.70          | 1.61          | 1.12   | 0.48          | 2.58            |                 |  |
| PBCS2      | 5       | 0.278 0.245 | 177 141 25 402 254 45    | 343 701      | 2.62     | 0.1053411     | 1  | 0.84   | 0.69          | 1.04          | 0.71   | 0.47          | 1.07            |                 |  |
| WHS        | 17      | 0.227 0.212 | 61 31 7 335 184 23       | 99 542       | 0.23     | 0.6349787     | 1  | 0.92   | 0.64          | 1.32          | 0.84   | 0.41          | 1.73            |                 |  |
| PBCS 1+2   | 13      | 0.258 0.247 | 291 207 34 605 374 73    | 532 1052     | 0.47     | 0.4932279     | 1  | 0.94   | 0.80          | 1.11          | 0.89   | 0.64          | 1.24            |                 |  |
| Locus      | Alleles | Chr         | Location                 | Neighborhood |          |               |    |        |               |               |        |               |                 |                 |  |
| rs7936636  | C T     | 11p11.2     |                          | 44397546     |          |               |    |        |               |               |        |               |                 |                 |  |
| SUBSET     | Rank    | MAF         | Geno Counts              | Subjects     | score X2 | score p-value | df | het OR | het OR 95% CI | het OR 95% CI | hom OR | hom OR 95% CI | hom OR 95% CI_u |                 |  |
| STAGE1-3   | 5       | 0.234 0.249 | 773 464 75 2989 1934 347 | 1312 5270    | 2.62     | 0.105839      | 1  | 1.09   | 0.98          | 1.20          | 1.18   | 0.97          | 1.44            |                 |  |
| NHS        | 5       | 0.219 0.247 | 110 66 7 470 276 61      | 183 807      | 1.21     | 0.2713948     | 1  | 1.16   | 0.89          | 1.51          | 1.35   | 0.79          | 2.29            |                 |  |
| STAGE1-2   | 5       | 0.226 0.245 | 474 264 45 2117 1303 246 | 783 3666     | 2.39     | 0.1222858     | 1  | 1.11   | 0.97          | 1.26          | 1.22   | 0.95          | 1.58            |                 |  |
| STAGE2     | 7       | 0.228 0.244 | 364 198 38 1647 1027 185 | 600 2859     | 1.34     | 0.24734       | 1  | 1.09   | 0.94          | 1.26          | 1.19   | 0.89          | 1.59            |                 |  |
| CPSII      | 9       | 0.274 0.222 | 23 15 4 197 98 21        | 42 316       | 1.05     | 0.3064476     | 1  | 0.78   | 0.48          | 1.26          | 0.60   | 0.23          | 1.60            |                 |  |
| PBCS1      | 19      | 0.228 0.229 | 115 62 12 212 119 21     | 189 352      | 0.00     | 0.9656885     | 1  | 1.01   | 0.75          | 1.35          | 1.01   | 0.57          | 1.81            |                 |  |

hom OR 95% CI

|          |    |             |                          |           |      |           |   |      |      |      |      |      |      |
|----------|----|-------------|--------------------------|-----------|------|-----------|---|------|------|------|------|------|------|
| STAGE1-3 | 7  | 0.131 0.121 | 1001 279 33 4075 1120 78 | 1313 5273 | 2.07 | 0.1503945 | 1 | 0.91 | 0.80 | 1.03 | 0.83 | 0.65 | 1.07 |
| NHS      | 1  | 0.156 0.121 | 127 55 1 624 169 13      | 183 806   | 3.31 | 0.0690526 | 1 | 0.74 | 0.54 | 1.02 | 0.55 | 0.29 | 1.05 |
| STAGE1-2 | 2  | 0.143 0.121 | 581 180 22 2831 783 52   | 783 3666  | 5.69 | 0.0170217 | 1 | 0.83 | 0.71 | 0.97 | 0.68 | 0.50 | 0.93 |
| STAGE2   | 4  | 0.139 0.121 | 454 125 21 2207 614 39   | 600 2860  | 2.97 | 0.0850757 | 1 | 0.85 | 0.71 | 1.02 | 0.73 | 0.51 | 1.05 |
| CPSII    | 15 | 0.131 0.114 | 33 7 2 250 60 6          | 42 316    | 0.19 | 0.6604261 | 1 | 0.86 | 0.45 | 1.66 | 0.75 | 0.20 | 2.74 |
| PBCS1    | 2  | 0.135 0.110 | 142 43 4 278 72 3        | 189 353   | 1.42 | 0.2335065 | 1 | 0.79 | 0.54 | 1.16 | 0.63 | 0.29 | 1.35 |
| PLCO     | 4  | 0.162 0.116 | 57 10 7 348 96 4         | 74 448    | 2.38 | 0.1232912 | 1 | 0.69 | 0.43 | 1.11 | 0.48 | 0.19 | 1.23 |
| WHI      | 15 | 0.137 0.126 | 222 65 8 1331 386 26     | 295 1743  | 0.61 | 0.433673  | 1 | 0.90 | 0.70 | 1.17 | 0.82 | 0.49 | 1.36 |
| STAGE3   | 17 | 0.115 0.122 | 420 100 11 1244 340 26   | 531 1610  | 0.35 | 0.556083  | 1 | 1.07 | 0.86 | 1.32 | 1.14 | 0.74 | 1.74 |
| NHS2     | 13 | 0.132 0.117 | 71 16 4 272 72 5         | 91 349    | 0.27 | 0.6052523 | 1 | 0.88 | 0.55 | 1.42 | 0.78 | 0.30 | 2.01 |
| PBCS2    | 10 | 0.102 0.119 | 276 62 4 554 145 12      | 342 711   | 1.22 | 0.2688138 | 1 | 1.18 | 0.88 | 1.58 | 1.39 | 0.78 | 2.49 |
| WHS      | 15 | 0.143 0.128 | 73 22 3 418 123 9        | 98 550    | 0.31 | 0.5765855 | 1 | 0.88 | 0.57 | 1.36 | 0.78 | 0.33 | 1.86 |
| PBCS 1+2 | 23 | 0.113 0.115 | 418 104 8 832 214 15     | 530 1061  | 0.02 | 0.8826962 | 1 | 1.02 | 0.81 | 1.28 | 1.04 | 0.65 | 1.64 |

Locus Alleles Chr Location Neighborhood  
rs10941679 A|G 5p12 44742255

| SUBSET   | Rank | MAF         | Geno Counts            | Subjects | score X2 | score p-value | df | het OR | het OR 95% CI | het OR 95% CI | hom OR | hom OR 95% CI | hom OR 95% CI_u |
|----------|------|-------------|------------------------|----------|----------|---------------|----|--------|---------------|---------------|--------|---------------|-----------------|
| STAGE1-3 | 8    | 0.262 0.282 | 383 276 47 991 791 148 | 706 1930 | 2.00     | 0.1569693     | 1  | 1.11   | 0.96          | 1.27          | 1.22   | 0.93          | 1.61            |
| STAGE3   | 3    | 0.245 0.277 | 298 198 30 830 650 118 | 526 1598 | 4.17     | 0.0410873     | 1  | 1.18   | 1.01          | 1.39          | 1.40   | 1.01          | 1.94            |
| NHS2     | 12   | 0.262 0.283 | 49 29 8 181 137 30     | 86 348   | 0.30     | 0.5838894     | 1  | 1.11   | 0.77          | 1.60          | 1.23   | 0.59          | 2.57            |
| PBCS2    | 1    | 0.235 0.288 | 196 130 15 350 308 50  | 341 708  | 7.09     | 0.0077615     | 1  | 1.34   | 1.08          | 1.67          | 1.81   | 1.17          | 2.79            |
| WHS      | 20   | 0.268 0.259 | 53 39 7 299 205 38     | 99 542   | 0.06     | 0.8044001     | 1  | 0.96   | 0.68          | 1.35          | 0.92   | 0.46          | 1.81            |
| PBCS 1+2 | 1    | 0.261 0.293 | 281 208 32 511 449 80  | 521 1040 | 3.60     | 0.0579455     | 1  | 1.18   | 0.99          | 1.40          | 1.39   | 0.99          | 1.96            |

Locus Alleles Chr Location Neighborhood

hom OR 95% CI

|          |    |             |                        |          |      |           |   |      |      |      |      |      |      |
|----------|----|-------------|------------------------|----------|------|-----------|---|------|------|------|------|------|------|
| PBCS2    | 16 | 0.397 0.386 | 122 171 51 266 333 105 | 344 704  | 0.24 | 0.6210363 | 1 | 0.95 | 0.79 | 1.15 | 0.91 | 0.62 | 1.32 |
| WHS      | 13 | 0.385 0.410 | 38 47 15 185 282 86    | 100 553  | 0.48 | 0.4897434 | 1 | 1.12 | 0.81 | 1.53 | 1.25 | 0.66 | 2.35 |
| PBCS 1+2 | 18 | 0.386 0.380 | 196 261 75 407 496 153 | 532 1056 | 0.13 | 0.7188577 | 1 | 0.97 | 0.84 | 1.13 | 0.95 | 0.70 | 1.28 |

Locus rs3817198 Alleles T|C Chr 11p15.5 Location Neighborhood 1865582 LSP1

| SUBSET   | Rank | MAF         | Geno Counts               | Subjects  | score X2 | score p-value | df | het OR | het OR 95% CI | het OR 95% CI | hom OR | hom OR 95% CI | hom OR 95% CI_u |
|----------|------|-------------|---------------------------|-----------|----------|---------------|----|--------|---------------|---------------|--------|---------------|-----------------|
| STAGE1-3 | 11   | 0.323 0.335 | 592 587 129 2368 2287 625 | 1308 5280 | 1.32     | 0.2502952     | 1  | 1.05   | 0.96          | 1.15          | 1.11   | 0.93          | 1.33            |
| NHS      | 6    | 0.308 0.328 | 82 88 12 373 339 95       | 182 807   | 0.54     | 0.4632186     | 1  | 1.10   | 0.86          | 1.40          | 1.20   | 0.74          | 1.96            |
| STAGE1-2 | 21   | 0.335 0.337 | 336 366 78 1631 1595 436  | 780 3662  | 0.03     | 0.8667912     | 1  | 1.01   | 0.90          | 1.13          | 1.02   | 0.81          | 1.28            |
| STAGE2   | 19   | 0.343 0.339 | 254 278 66 1258 1256 341  | 598 2855  | 0.05     | 0.8220666     | 1  | 0.99   | 0.86          | 1.12          | 0.97   | 0.75          | 1.26            |
| CPSII    | 13   | 0.381 0.340 | 16 20 6 139 138 38        | 42 315    | 0.55     | 0.4591504     | 1  | 0.84   | 0.53          | 1.34          | 0.70   | 0.28          | 1.79            |
| PBCS1    | 18   | 0.321 0.326 | 84 86 17 161 150 39       | 187 350   | 0.03     | 0.8710312     | 1  | 1.02   | 0.78          | 1.34          | 1.05   | 0.61          | 1.79            |
| PLCO     | 10   | 0.365 0.334 | 28 38 8 190 215 42        | 74 447    | 0.57     | 0.4493308     | 1  | 0.86   | 0.59          | 1.26          | 0.75   | 0.35          | 1.59            |
| WHI      | 21   | 0.346 0.343 | 126 134 35 768 753 222    | 295 1743  | 0.01     | 0.9115703     | 1  | 0.99   | 0.83          | 1.19          | 0.98   | 0.68          | 1.41            |
| STAGE3   | 9    | 0.308 0.331 | 255 222 52 734 693 189    | 529 1616  | 1.91     | 0.1673563     | 1  | 1.11   | 0.96          | 1.29          | 1.23   | 0.92          | 1.65            |
| NHS2     | 2    | 0.264 0.331 | 52 30 9 162 155 41        | 91 358    | 2.89     | 0.0891744     | 1  | 1.36   | 0.95          | 1.95          | 1.86   | 0.91          | 3.80            |
| PBCS2    | 22   | 0.333 0.330 | 154 148 40 326 301 84     | 342 711   | 0.02     | 0.8747063     | 1  | 0.98   | 0.81          | 1.19          | 0.97   | 0.66          | 1.42            |
| WHS      | 2    | 0.260 0.334 | 49 44 3 246 237 64        | 96 547    | 4.01     | 0.0453537     | 1  | 1.42   | 1.01          | 2.01          | 2.03   | 1.01          | 4.06            |
| PBCS 1+2 | 24   | 0.327 0.327 | 239 233 56 490 450 123    | 528 1063  | 0.00     | 0.9700755     | 1  | 1.00   | 0.86          | 1.17          | 1.01   | 0.74          | 1.37            |

Locus rs17740709 Alleles A|G Chr 12q21.31 Location Neighborhood 81947471 TMTC2

hom OR 95% CI

| Locus     | Alleles | Chr         | Location                  | Neighborhood |          |               |    |        |               |               |        |               |               |                 |  |
|-----------|---------|-------------|---------------------------|--------------|----------|---------------|----|--------|---------------|---------------|--------|---------------|---------------|-----------------|--|
| rs2391406 | T G     | 13q33.3     |                           | 106586873    |          |               |    |        |               |               |        |               |               |                 |  |
| SUBSET    | Rank    | MAF         | Geno Counts               | Subjects     | score X2 | score p-value | df | het OR | het OR 95% CI | het OR 95% CI | hom OR | hom OR 95% CI | hom OR 95% CI | hom OR 95% CI_u |  |
| STAGE1-3  | 14      | 0.359 0.367 | 521 636 152 2088 2463 694 | 1309 5245    | 0.60     | 0.4392051     | 1  | 1.04   | 0.95          | 1.13          | 1.07   | 0.90          | 1.29          |                 |  |
| NHS       | 12      | 0.358 0.366 | 72 91 20 323 377 107      | 183 807      | 0.09     | 0.7649385     | 1  | 1.04   | 0.82          | 1.32          | 1.08   | 0.67          | 1.73          |                 |  |
| STAGE1-2  | 12      | 0.355 0.363 | 314 380 87 1453 1759 451  | 781 3663     | 0.43     | 0.5139465     | 1  | 1.04   | 0.93          | 1.17          | 1.08   | 0.86          | 1.36          |                 |  |
| STAGE2    | 15      | 0.354 0.362 | 242 289 67 1130 1382 344  | 598 2856     | 0.34     | 0.5584328     | 1  | 1.04   | 0.91          | 1.19          | 1.08   | 0.83          | 1.41          |                 |  |
| CPSII     | 7       | 0.402 0.339 | 12 25 4 132 150 31        | 41 313       | 1.44     | 0.2308214     | 1  | 0.74   | 0.45          | 1.21          | 0.54   | 0.20          | 1.48          |                 |  |
| PBCS1     | 10      | 0.362 0.375 | 78 84 26 125 190 37       | 188 352      | 0.20     | 0.6516887     | 1  | 1.06   | 0.81          | 1.40          | 1.13   | 0.66          | 1.95          |                 |  |
| PLCO      | 14      | 0.345 0.360 | 29 39 6 180 213 55        | 74 448       | 0.15     | 0.7014692     | 1  | 1.08   | 0.74          | 1.57          | 1.16   | 0.55          | 2.45          |                 |  |
| WHI       | 11      | 0.344 0.365 | 123 141 31 693 829 221    | 295 1743     | 0.95     | 0.3294828     | 1  | 1.10   | 0.91          | 1.32          | 1.20   | 0.83          | 1.75          |                 |  |
| STAGE3    | 16      | 0.365 0.376 | 207 255 65 635 705 243    | 527 1583     | 0.39     | 0.5316013     | 1  | 1.05   | 0.91          | 1.21          | 1.10   | 0.82          | 1.46          |                 |  |
| NHS2      | 6       | 0.348 0.402 | 37 42 10 129 162 60       | 89 351       | 1.66     | 0.1980689     | 1  | 1.25   | 0.89          | 1.76          | 1.56   | 0.79          | 3.08          |                 |  |
| PBCS2     | 24      | 0.382 0.381 | 126 171 45 275 321 108    | 342 704      | 0.00     | 0.9934236     | 1  | 1.00   | 0.83          | 1.21          | 1.00   | 0.69          | 1.45          |                 |  |
| WHS       | 12      | 0.323 0.352 | 44 42 10 231 222 75       | 96 528       | 0.58     | 0.4469854     | 1  | 1.13   | 0.82          | 1.55          | 1.28   | 0.68          | 2.42          |                 |  |
| PBCS 1+2  | 21      | 0.375 0.379 | 204 256 71 400 510 145    | 531 1055     | 0.06     | 0.8075242     | 1  | 1.02   | 0.87          | 1.19          | 1.04   | 0.76          | 1.41          |                 |  |

| Locus      | Alleles | Chr         | Location                  | Neighborhood |             |               |    |        |               |               |        |               |               |                 |  |
|------------|---------|-------------|---------------------------|--------------|-------------|---------------|----|--------|---------------|---------------|--------|---------------|---------------|-----------------|--|
| rs11077820 | T C     | 17q25.1     |                           | 71966263     | UBE2O,AANAT |               |    |        |               |               |        |               |               |                 |  |
| SUBSET     | Rank    | MAF         | Geno Counts               | Subjects     | score X2    | score p-value | df | het OR | het OR 95% CI | het OR 95% CI | hom OR | hom OR 95% CI | hom OR 95% CI | hom OR 95% CI_u |  |
| STAGE1-3   | 15      | 0.359 0.367 | 543 598 173 2153 2342 760 | 1314 5255    | 0.60        | 0.4401695     | 1  | 1.04   | 0.95          | 1.13          | 1.07   | 0.90          | 1.28          |                 |  |

hom OR 95% CI

| SUBSET   | Rank | MAF         | Geno Counts              | Subjects  | score X2 | score p-value | df | het OR | het OR 95% CI | het OR 95% CI | hom OR | hom OR 95% CI | hom OR 95% CI_u |
|----------|------|-------------|--------------------------|-----------|----------|---------------|----|--------|---------------|---------------|--------|---------------|-----------------|
| STAGE1-3 | 17   | 0.249 0.243 | 734 499 77 3003 1970 297 | 1310 5270 | 0.41     | 0.5210439     | 1  | 0.97   | 0.88          | 1.07          | 0.94   | 0.77          | 1.14            |
| NHS      | 20   | 0.260 0.262 | 101 69 13 433 325 49     | 183 807   | 0.01     | 0.9199331     | 1  | 1.01   | 0.78          | 1.32          | 1.03   | 0.61          | 1.74            |
| STAGE1-2 | 11   | 0.255 0.247 | 428 310 45 2072 1377 218 | 783 3667  | 0.47     | 0.491162      | 1  | 0.96   | 0.84          | 1.09          | 0.92   | 0.71          | 1.18            |
| STAGE2   | 8    | 0.254 0.243 | 327 241 32 1639 1052 169 | 600 2860  | 0.67     | 0.4113562     | 1  | 0.94   | 0.82          | 1.09          | 0.89   | 0.66          | 1.18            |
| CPSII    | 14   | 0.250 0.222 | 23 17 2 193 106 17       | 42 316    | 0.34     | 0.5597335     | 1  | 0.86   | 0.51          | 1.45          | 0.73   | 0.26          | 2.09            |
| PBCS1    | 17   | 0.235 0.231 | 106 77 6 213 117 23      | 189 353   | 0.03     | 0.8649575     | 1  | 0.97   | 0.73          | 1.31          | 0.95   | 0.53          | 1.72            |
| PLCO     | 17   | 0.264 0.253 | 38 33 3 247 175 26       | 74 448    | 0.07     | 0.7874276     | 1  | 0.95   | 0.63          | 1.42          | 0.89   | 0.40          | 2.01            |
| WHI      | 12   | 0.264 0.247 | 160 114 21 986 654 103   | 295 1743  | 0.85     | 0.3562168     | 1  | 0.91   | 0.75          | 1.11          | 0.83   | 0.56          | 1.23            |
| STAGE3   | 21   | 0.241 0.235 | 306 190 32 931 595 80    | 528 1606  | 0.13     | 0.7138456     | 1  | 0.97   | 0.82          | 1.14          | 0.94   | 0.68          | 1.31            |
| NHS2     | 16   | 0.230 0.244 | 54 26 7 196 131 19       | 87 346    | 0.15     | 0.6942542     | 1  | 1.08   | 0.73          | 1.60          | 1.17   | 0.53          | 2.56            |
| PBCS2    | 19   | 0.230 0.225 | 202 124 17 427 240 39    | 343 706   | 0.07     | 0.7943547     | 1  | 0.97   | 0.78          | 1.21          | 0.94   | 0.61          | 1.45            |
| WHS      | 7    | 0.286 0.242 | 50 40 8 308 224 22       | 98 554    | 1.87     | 0.1713057     | 1  | 0.78   | 0.55          | 1.11          | 0.61   | 0.30          | 1.24            |
| PBCS 1+2 | 16   | 0.232 0.226 | 308 200 23 640 355 61    | 531 1056  | 0.13     | 0.7146185     | 1  | 0.97   | 0.81          | 1.15          | 0.94   | 0.66          | 1.33            |

Locus Alleles Chr Location Neighborhood  
rs2303659 G|A 11q24.3 129326474 PRDM10

| SUBSET   | Rank | MAF         | Geno Counts          | Subjects  | score X2 | score p-value | df | het OR | het OR 95% CI | het OR 95% CI | hom OR | hom OR 95% CI | hom OR 95% CI_u |
|----------|------|-------------|----------------------|-----------|----------|---------------|----|--------|---------------|---------------|--------|---------------|-----------------|
| STAGE1-3 | 18   | 0.024 0.026 | 1251 59 2 4997 257 9 | 1312 5263 | 0.36     | 0.5478617     | 1  | 1.09   | 0.83          | 1.43          | 1.18   | 0.69          | 2.04            |
| NHS      | 8    | 0.022 0.026 | 175 8 0 765 42 0     | 183 807   | 0.22     | 0.6422698     | 1  | 1.20   | 0.55          | 2.60          | 1.44   | 0.31          | 6.78            |
| STAGE1-2 | 10   | 0.022 0.025 | 749 34 0 3487 178 2  | 783 3667  | 0.53     | 0.4673041     | 1  | 1.15   | 0.79          | 1.66          | 1.32   | 0.63          | 2.77            |

hom OR 95% CI

|          |    |             |                           |          |      |           |   |      |      |      |      |      |      |
|----------|----|-------------|---------------------------|----------|------|-----------|---|------|------|------|------|------|------|
| STAGE1-2 | 20 | 0.427 0.429 | 248 402 133 1213 1761 692 | 783 3666 | 0.03 | 0.8634978 | 1 | 1.01 | 0.90 | 1.13 | 1.02 | 0.82 | 1.27 |
| STAGE2   | 22 | 0.425 0.427 | 193 304 103 952 1373 534  | 600 2859 | 0.01 | 0.904253  | 1 | 1.01 | 0.89 | 1.14 | 1.02 | 0.79 | 1.30 |
| CPSII    | 19 | 0.429 0.440 | 15 18 9 101 152 63        | 42 316   | 0.04 | 0.8471834 | 1 | 1.05 | 0.67 | 1.64 | 1.09 | 0.44 | 2.70 |
| PBCS1    | 7  | 0.439 0.457 | 57 98 34 104 174 74       | 189 352  | 0.34 | 0.5625296 | 1 | 1.08 | 0.84 | 1.39 | 1.16 | 0.70 | 1.93 |
| PLCO     | 5  | 0.453 0.391 | 22 37 15 167 212 69       | 74 448   | 2.03 | 0.154338  | 1 | 0.78 | 0.55 | 1.10 | 0.60 | 0.30 | 1.21 |
| WHI      | 13 | 0.408 0.428 | 99 151 45 580 835 328     | 295 1743 | 0.76 | 0.3844313 | 1 | 1.08 | 0.91 | 1.29 | 1.17 | 0.82 | 1.66 |
| STAGE3   | 22 | 0.450 0.444 | 164 252 111 493 802 313   | 527 1608 | 0.10 | 0.747313  | 1 | 0.98 | 0.85 | 1.12 | 0.96 | 0.72 | 1.26 |
| NHS2     | 3  | 0.500 0.429 | 21 47 21 114 168 65       | 89 347   | 2.86 | 0.0909365 | 1 | 0.75 | 0.54 | 1.05 | 0.57 | 0.29 | 1.10 |
| PBCS2    | 12 | 0.432 0.451 | 115 156 69 211 357 141    | 340 709  | 0.62 | 0.4325401 | 1 | 1.08 | 0.90 | 1.29 | 1.16 | 0.80 | 1.67 |
| WHS      | 16 | 0.464 0.445 | 28 49 21 168 277 107      | 98 552   | 0.26 | 0.6096394 | 1 | 0.92 | 0.68 | 1.25 | 0.85 | 0.46 | 1.57 |
| PBCS 1+2 | 10 | 0.436 0.452 | 171 254 103 315 531 214   | 528 1060 | 0.80 | 0.37099   | 1 | 1.07 | 0.92 | 1.24 | 1.15 | 0.85 | 1.54 |

Locus Alleles Chr Location Neighborhood  
rs10850145 C|T 12q24.13 112428512

| SUBSET   | Rank | MAF         | Geno Counts              | Subjects  | score X2 | score p-value | df | het OR | het OR 95% CI | het OR 95% CI | hom OR | hom OR 95% CI | hom OR 95% CI_u |
|----------|------|-------------|--------------------------|-----------|----------|---------------|----|--------|---------------|---------------|--------|---------------|-----------------|
| STAGE1-3 | 21   | 0.108 0.109 | 1047 249 17 4185 1048 54 | 1313 5287 | 0.05     | 0.8178044     | 1  | 1.02   | 0.89          | 1.17          | 1.03   | 0.78          | 1.36            |
| NHS      | 7    | 0.117 0.108 | 145 33 5 642 155 10      | 183 807   | 0.24     | 0.6224405     | 1  | 0.92   | 0.65          | 1.30          | 0.84   | 0.42          | 1.69            |
| STAGE1-2 | 16   | 0.107 0.111 | 626 146 11 2898 724 43   | 783 3665  | 0.14     | 0.7112003     | 1  | 1.03   | 0.87          | 1.23          | 1.07   | 0.75          | 1.52            |
| STAGE2   | 11   | 0.104 0.111 | 481 113 6 2256 569 33    | 600 2858  | 0.49     | 0.4838183     | 1  | 1.08   | 0.88          | 1.32          | 1.16   | 0.77          | 1.74            |
| CPSII    | 8    | 0.071 0.111 | 37 4 1 250 62 4          | 42 316    | 1.18     | 0.278287      | 1  | 1.60   | 0.68          | 3.78          | 2.57   | 0.46          | 14.31           |
| PBCS1    | 3    | 0.101 0.123 | 152 36 1 270 79 4        | 189 353   | 1.30     | 0.2550826     | 1  | 1.27   | 0.84          | 1.92          | 1.61   | 0.71          | 3.67            |

hom OR 95% CI

|          |    |             |                        |          |      |           |   |      |      |      |      |      |      |
|----------|----|-------------|------------------------|----------|------|-----------|---|------|------|------|------|------|------|
| PLCO     | 1  | 0.230 0.160 | 41 32 1 318 117 13     | 74 448   | 4.50 | 0.0339221 | 1 | 0.63 | 0.41 | 0.97 | 0.40 | 0.17 | 0.94 |
| WHI      | 5  | 0.186 0.158 | 200 80 15 1244 447 51  | 295 1742 | 2.96 | 0.0851514 | 1 | 0.82 | 0.66 | 1.03 | 0.68 | 0.44 | 1.06 |
| STAGE3   | 6  | 0.141 0.160 | 392 130 10 1133 431 41 | 532 1605 | 2.17 | 0.1410471 | 1 | 1.16 | 0.95 | 1.41 | 1.34 | 0.91 | 1.99 |
| NHS2     | 23 | 0.154 0.153 | 65 24 2 254 88 10      | 91 352   | 0.00 | 0.9885213 | 1 | 1.00 | 0.64 | 1.56 | 0.99 | 0.41 | 2.42 |
| PBCS2    | 8  | 0.136 0.158 | 254 81 6 496 184 18    | 341 698  | 1.61 | 0.2046553 | 1 | 1.18 | 0.91 | 1.54 | 1.40 | 0.83 | 2.37 |
| WHS      | 11 | 0.145 0.167 | 73 25 2 383 159 13     | 100 555  | 0.60 | 0.4390887 | 1 | 1.18 | 0.77 | 1.82 | 1.40 | 0.59 | 3.32 |
| PBCS 1+2 | 6  | 0.141 0.157 | 388 135 7 755 260 35   | 530 1050 | 1.46 | 0.2262763 | 1 | 1.14 | 0.92 | 1.40 | 1.29 | 0.85 | 1.95 |

Locus Alleles Chr Location Neighborhood  
rs4666451 G|A 2p24.1 19150424

| SUBSET   | Rank | MAF         | Geno Counts               | Subjects  | score X2 | score p-value | df | het OR | het OR 95% CI | het OR 95% CI | hom OR | hom OR 95% CI | hom OR 95% CI_u |
|----------|------|-------------|---------------------------|-----------|----------|---------------|----|--------|---------------|---------------|--------|---------------|-----------------|
| STAGE1-3 | 24   | 0.385 0.386 | 428 533 168 1679 2133 657 | 1129 4469 | 0.00     | 0.9440175     | 1  | 1.00   | 0.91          | 1.10          | 1.01   | 0.83          | 1.22            |
| STAGE1-2 | 6    | 0.361 0.384 | 245 277 78 1078 1366 416  | 600 2860  | 2.33     | 0.127         | 1  | 1.11   | 0.97          | 1.26          | 1.22   | 0.94          | 1.59            |
| STAGE2   | 6    | 0.361 0.384 | 245 277 78 1078 1366 416  | 600 2860  | 2.33     | 0.127         | 1  | 1.11   | 0.97          | 1.26          | 1.22   | 0.94          | 1.59            |
| CPSII    | 10   | 0.369 0.413 | 18 17 7 96 179 41         | 42 316    | 0.68     | 0.4083213     | 1  | 1.24   | 0.75          | 2.05          | 1.53   | 0.56          | 4.20            |
| PBCS1    | 16   | 0.384 0.375 | 67 99 23 140 161 52       | 189 353   | 0.07     | 0.7876051     | 1  | 0.96   | 0.74          | 1.25          | 0.93   | 0.55          | 1.57            |
| PLCO     | 6    | 0.338 0.394 | 30 38 6 170 203 75        | 74 448    | 1.65     | 0.1995048     | 1  | 1.27   | 0.88          | 1.82          | 1.61   | 0.78          | 3.31            |
| WHI      | 8    | 0.351 0.378 | 130 123 42 672 823 248    | 295 1743  | 1.62     | 0.203473      | 1  | 1.13   | 0.94          | 1.35          | 1.27   | 0.88          | 1.82            |
| STAGE3   | 8    | 0.412 0.388 | 183 257 90 601 769 241    | 530 1611  | 1.93     | 0.1648011     | 1  | 0.90   | 0.79          | 1.04          | 0.82   | 0.62          | 1.09            |
| NHS2     | 1    | 0.439 0.369 | 33 35 22 134 171 43       | 90 348    | 2.92     | 0.0876378     | 1  | 0.75   | 0.54          | 1.04          | 0.56   | 0.29          | 1.09            |

hom OR 95% CI



|          |    |             |                        |          |      |           |   |      |      |      |
|----------|----|-------------|------------------------|----------|------|-----------|---|------|------|------|
| NHS2     | 11 | 0.349 0.366 | 36 40 10 147 152 53    | 86 352   | 0.66 | 0.4166072 | 1 | 1.35 | 0.66 | 2.77 |
| PBCS2    | 2  | 0.335 0.365 | 146 160 34 286 322 96  | 340 704  | 2.78 | 0.0953901 | 1 | 1.42 | 0.94 | 2.15 |
| WHS      | 5  | 0.321 0.394 | 44 45 9 195 269 80     | 98 544   | 2.12 | 0.1453241 | 1 | 1.71 | 0.83 | 3.52 |
| PBCS 1+2 | 5  | 0.342 0.365 | 229 238 62 432 476 147 | 529 1055 | 1.51 | 0.2195817 | 1 | 1.22 | 0.89 | 1.67 |

Locus Alleles Chr Location Neighborhood  
rs11249433 T|C 1p11.2 120982136 LOC647121

| SUBSET   | Rank | MAF         | Geno Counts                | Subjects  | score X2 | score p-value | df | hom OR | hom OR 95% l | hom OR 95% Cl_u |
|----------|------|-------------|----------------------------|-----------|----------|---------------|----|--------|--------------|-----------------|
| STAGE1-3 | 3    | 0.399 0.439 | 478 610 215 1655 2556 1017 | 1303 5228 | 5.94     | 0.0147934     | 1  | 1.22   | 1.04         | 1.44            |
| NHS      | 15   | 0.412 0.448 | 65 84 33 238 411 155       | 182 804   | 0.13     | 0.7221251     | 1  | 1.08   | 0.71         | 1.63            |
| STAGE1-2 | 2    | 0.407 0.441 | 271 383 126 1124 1831 695  | 780 3650  | 3.55     | 0.0596037     | 1  | 1.22   | 0.99         | 1.50            |
| STAGE2   | 2    | 0.406 0.439 | 206 299 93 886 1420 540    | 598 2846  | 3.86     | 0.0495164     | 1  | 1.27   | 1.00         | 1.62            |
| CPSII    | 1    | 0.524 0.405 | 8 24 10 108 159 48         | 42 315    | 2.00     | 0.1572011     | 1  | 0.58   | 0.27         | 1.25            |
| PBCS1    | 14   | 0.392 0.407 | 67 96 26 124 171 58        | 189 353   | 0.67     | 0.4123345     | 1  | 1.23   | 0.75         | 2.03            |
| PLCO     | 19   | 0.411 0.427 | 26 34 13 140 232 75        | 73 447    | 0.05     | 0.8277862     | 1  | 0.93   | 0.49         | 1.78            |
| WHI      | 2    | 0.396 0.455 | 105 145 44 514 858 359     | 294 1731  | 5.26     | 0.0218816     | 1  | 1.49   | 1.06         | 2.09            |
| STAGE3   | 4    | 0.387 0.434 | 207 227 89 531 725 322     | 523 1578  | 2.87     | 0.0904653     | 1  | 1.25   | 0.97         | 1.62            |
| NHS2     | 22   | 0.450 0.440 | 29 41 20 114 152 73        | 90 339    | 0.02     | 0.8879734     | 1  | 0.96   | 0.55         | 1.68            |
| PBCS2    | 7    | 0.372 0.410 | 137 149 51 246 324 121     | 337 691   | 0.92     | 0.3377601     | 1  | 1.19   | 0.83         | 1.70            |

hom OR 95% l

PBCS 1+2 14 0.327|0.327 239|233|56|490|450|123 528|1063 0.33 0.5662589 1 1.10 0.79 1.54

Locus Alleles Chr Location Neighborhood  
rs7716600 C|A 5p12 44910762

| SUBSET   | Rank | MAF         | Geno Counts              | Subjects  | score X2 | score p-value | df | hom OR | hom OR 95% CI_l | hom OR 95% CI_u |
|----------|------|-------------|--------------------------|-----------|----------|---------------|----|--------|-----------------|-----------------|
| STAGE1-3 | 6    | 0.221 0.243 | 800 446 67 3042 1901 333 | 1313 5276 | 2.69     | 0.100724      | 1  | 1.25   | 0.96            | 1.64            |
| NHS      | 12   | 0.246 0.253 | 108 60 15 451 303 53     | 183 807   | 0.62     | 0.4314343     | 1  | 0.79   | 0.43            | 1.43            |
| STAGE1-2 | 7    | 0.227 0.249 | 473 265 45 2095 1316 253 | 783 3664  | 1.38     | 0.2395144     | 1  | 1.22   | 0.88            | 1.69            |
| STAGE2   | 3    | 0.221 0.247 | 365 205 30 1644 1013 200 | 600 2857  | 3.19     | 0.073872      | 1  | 1.43   | 0.96            | 2.12            |
| CPSII    | 18   | 0.226 0.241 | 26 13 3 186 108 22       | 42 316    | 0.00     | 0.9655414     | 1  | 0.97   | 0.28            | 3.40            |
| PBCS1    | 18   | 0.272 0.272 | 99 77 13 186 139 26      | 189 351   | 0.05     | 0.8207719     | 1  | 1.08   | 0.54            | 2.16            |
| PLCO     | 18   | 0.169 0.232 | 52 19 3 261 166 21       | 74 448    | 0.06     | 0.8095283     | 1  | 1.16   | 0.34            | 4.00            |
| WHI      | 1    | 0.200 0.247 | 188 96 11 1011 600 131   | 295 1742  | 5.59     | 0.018047      | 1  | 2.10   | 1.12            | 3.93            |
| STAGE3   | 17   | 0.212 0.231 | 327 181 22 948 587 79    | 530 1614  | 0.49     | 0.4831988     | 1  | 1.19   | 0.73            | 1.93            |
| NHS2     | 10   | 0.261 0.232 | 49 35 6 205 131 16       | 90 352    | 0.68     | 0.4089424     | 1  | 0.67   | 0.25            | 1.76            |
| PBCS2    | 3    | 0.195 0.233 | 219 111 11 417 254 38    | 341 709   | 2.36     | 0.1247522     | 1  | 1.70   | 0.86            | 3.37            |
| WHS      | 20   | 0.227 0.228 | 59 35 5 326 202 25       | 99 553    | 0.05     | 0.8167877     | 1  | 0.89   | 0.33            | 2.38            |
| PBCS 1+2 | 2    | 0.223 0.246 | 318 188 24 602 391 65    | 530 1058  | 1.74     | 0.1869294     | 1  | 1.38   | 0.85            | 2.23            |

hom OR 95% CI\_l

rs11077820 T|C 17q25.1 71966263 UBE2O,AANAT

| SUBSET   | Rank | MAF         | Geno Counts               | Subjects  | score X2 | score p-value | df | hom OR | hom OR 95% l | hom OR 95% Cl_u |
|----------|------|-------------|---------------------------|-----------|----------|---------------|----|--------|--------------|-----------------|
| STAGE1-3 | 9    | 0.359 0.367 | 543 598 173 2153 2342 760 | 1314 5255 | 1.45     | 0.2285284     | 1  | 1.12   | 0.93         | 1.33            |
| NHS      | 18   | 0.374 0.374 | 73 83 27 329 353 125      | 183 807   | 0.06     | 0.8032534     | 1  | 1.06   | 0.67         | 1.66            |
| STAGE1-2 | 5    | 0.361 0.368 | 318 364 101 1502 1623 538 | 783 3663  | 1.68     | 0.1954078     | 1  | 1.16   | 0.93         | 1.46            |
| STAGE2   | 5    | 0.357 0.367 | 245 281 74 1173 1270 413  | 600 2856  | 1.85     | 0.1733419     | 1  | 1.20   | 0.92         | 1.57            |
| CPSII    | 12   | 0.357 0.359 | 17 20 5 131 143 42        | 42 316    | 0.06     | 0.8026221     | 1  | 1.13   | 0.42         | 3.05            |
| PBCS1    | 10   | 0.381 0.334 | 74 86 29 160 150 43       | 189 353   | 1.07     | 0.3012162     | 1  | 0.77   | 0.46         | 1.27            |
| PLCO     | 20   | 0.358 0.354 | 30 35 9 188 200 58        | 74 446    | 0.04     | 0.8412475     | 1  | 1.08   | 0.51         | 2.28            |
| WHI      | 3    | 0.342 0.378 | 124 140 31 694 777 270    | 295 1741  | 5.01     | 0.0252669     | 1  | 1.56   | 1.05         | 2.32            |
| STAGE3   | 21   | 0.356 0.365 | 225 234 72 651 720 222    | 531 1593  | 0.05     | 0.8276979     | 1  | 1.03   | 0.78         | 1.37            |
| NHS2     | 17   | 0.337 0.373 | 43 32 14 136 163 48       | 89 347    | 0.21     | 0.6474946     | 1  | 0.86   | 0.45         | 1.64            |
| PBCS2    | 20   | 0.366 0.382 | 141 153 49 269 335 102    | 343 706   | 0.00     | 0.9441424     | 1  | 1.01   | 0.70         | 1.46            |
| WHS      | 10   | 0.338 0.339 | 41 49 9 246 222 72        | 99 540    | 1.36     | 0.2434833     | 1  | 1.54   | 0.74         | 3.19            |
| PBCS 1+2 | 15   | 0.371 0.366 | 215 239 78 429 484 145    | 532 1058  | 0.27     | 0.6042597     | 1  | 0.92   | 0.69         | 1.24            |

Locus Alleles Chr Location Neighborhood

hom OR 95% l

|          |    |             |                          |           |      |           |   |      |      |      |
|----------|----|-------------|--------------------------|-----------|------|-----------|---|------|------|------|
| STAGE1-3 | 12 | 0.223 0.208 | 795 444 70 3307 1695 246 | 1309 5248 | 1.00 | 0.3184759 | 1 | 0.87 | 0.66 | 1.14 |
| NHS      | 9  | 0.191 0.189 | 122 52 9 529 251 27      | 183 807   | 1.05 | 0.3049532 | 1 | 0.67 | 0.31 | 1.45 |
| STAGE1-2 | 22 | 0.200 0.200 | 504 243 35 2361 1141 162 | 782 3664  | 0.00 | 0.9465864 | 1 | 0.99 | 0.68 | 1.43 |
| STAGE2   | 16 | 0.203 0.203 | 382 191 26 1832 890 135  | 599 2857  | 0.16 | 0.684622  | 1 | 1.09 | 0.71 | 1.68 |
| CPSII    | 21 | 0.146 0.213 | 29 12 0 201 94 20        | 41 315    |      |           |   |      |      |      |
| PBCS1    | 5  | 0.222 0.249 | 114 66 9 204 121 27      | 189 352   | 1.67 | 0.1956179 | 1 | 1.66 | 0.76 | 3.61 |
| PLCO     | 17 | 0.203 0.195 | 47 24 3 288 145 15       | 74 448    | 0.10 | 0.7578696 | 1 | 0.82 | 0.23 | 2.90 |
| WHI      | 16 | 0.198 0.194 | 192 89 14 1139 530 73    | 295 1742  | 0.19 | 0.6627648 | 1 | 0.88 | 0.49 | 1.58 |
| STAGE3   | 7  | 0.257 0.227 | 291 201 35 947 555 83    | 527 1585  | 1.48 | 0.2238399 | 1 | 0.78 | 0.52 | 1.17 |
| NHS2     | 19 | 0.206 0.215 | 53 29 3 210 117 15       | 85 342    | 0.12 | 0.7250508 | 1 | 1.25 | 0.35 | 4.43 |
| PBCS2    | 12 | 0.278 0.245 | 177 141 25 402 254 45    | 343 701   | 0.28 | 0.5978974 | 1 | 0.87 | 0.53 | 1.45 |
| WHS      | 8  | 0.227 0.212 | 61 31 7 335 184 23       | 99 542    | 1.50 | 0.2207027 | 1 | 0.58 | 0.24 | 1.40 |
| PBCS 1+2 | 17 | 0.258 0.247 | 291 207 34 605 374 73    | 532 1052  | 0.17 | 0.6813879 | 1 | 1.09 | 0.72 | 1.66 |

| Locus     | Alleles | Chr     | Location | Neighborhood    |
|-----------|---------|---------|----------|-----------------|
| rs7121523 | G A     | 11p15.4 |          | 7556781 PPFIBP2 |

hom OR 95% I

|          |    |             |                     |          |      |           |   |      |      |      |
|----------|----|-------------|---------------------|----------|------|-----------|---|------|------|------|
| PBCS2    | 15 | 0.105 0.107 | 273 68 2 565 143 5  | 343 713  | 0.05 | 0.8246128 | 1 | 1.20 | 0.23 | 6.24 |
| WHS      | 24 | 0.096 0.110 | 80 19 0 434 122 0   | 99 556   | -    |           | 1 | 1.00 | 1.00 | 1.00 |
| PBCS 1+2 | 13 | 0.103 0.113 | 425 104 3 833 222 9 | 532 1064 | 0.38 | 0.538761  | 1 | 1.50 | 0.41 | 5.58 |

Locus rs37936 Alleles A|G Chr 7q21.11 Location Neighborhood 79806994

| SUBSET   | Rank | MAF         | Geno Counts               | Subjects  | score X2 | score p-value | df | hom OR | hom OR 95% CI_l | hom OR 95% CI_u |
|----------|------|-------------|---------------------------|-----------|----------|---------------|----|--------|-----------------|-----------------|
| STAGE1-3 | 16   | 0.370 0.367 | 521 572 187 2078 2378 707 | 1280 5163 | 0.72     | 0.3961964     | 1  | 0.93   | 0.78            | 1.10            |
| NHS      | 8    | 0.369 0.362 | 77 68 31 333 343 115      | 176 791   | 1.06     | 0.3027554     | 1  | 0.80   | 0.51            | 1.23            |
| STAGE1-2 | 8    | 0.374 0.363 | 233 255 88 1325 1468 438  | 576 3231  | 1.22     | 0.2699911     | 1  | 0.87   | 0.68            | 1.11            |
| STAGE2   | 13   | 0.376 0.363 | 156 187 57 992 1125 323   | 400 2440  | 0.30     | 0.5814769     | 1  | 0.92   | 0.68            | 1.24            |
| CPSII    | 23   | 0.263 0.355 | 19 21 0 131 139 41        | 40 311    |          |               |    |        |                 |                 |
| PLCO     | 21   | 0.396 0.372 | 26 35 11 181 186 69       | 72 436    | 0.01     | 0.9058733     | 1  | 1.04   | 0.52            | 2.08            |
| WHI      | 7    | 0.387 0.362 | 111 131 46 680 800 213    | 288 1693  | 2.49     | 0.1145473     | 1  | 0.76   | 0.54            | 1.07            |
| STAGE3   | 12   | 0.382 0.374 | 205 241 81 624 763 219    | 527 1606  | 0.99     | 0.3205482     | 1  | 0.87   | 0.66            | 1.15            |

hom OR 95% CI\_l

| Locus     | Alleles | Chr         | Location                 | Neighborhood         |          |               |    |        |                 |                 |  |
|-----------|---------|-------------|--------------------------|----------------------|----------|---------------|----|--------|-----------------|-----------------|--|
| rs3134615 | G T     | 1p34.2      |                          | 40134653 TRIT1,MYCL1 |          |               |    |        |                 |                 |  |
| SUBSET    | Rank    | MAF         | Geno Counts              | Subjects             | score X2 | score p-value | df | hom OR | hom OR 95% CI_l | hom OR 95% CI_u |  |
| STAGE1-3  | 19      | 0.249 0.243 | 734 499 77 3003 1970 297 | 1310 5270            | 0.11     | 0.7347468     | 1  | 0.96   | 0.74            | 1.24            |  |
| NHS       | 14      | 0.260 0.262 | 101 69 13 433 325 49     | 183 807              | 0.27     | 0.6029241     | 1  | 0.85   | 0.45            | 1.59            |  |
| STAGE1-2  | 20      | 0.255 0.247 | 428 310 45 2072 1377 218 | 783 3667             | 0.05     | 0.8312862     | 1  | 1.04   | 0.74            | 1.44            |  |
| STAGE2    | 14      | 0.254 0.243 | 327 241 32 1639 1052 169 | 600 2860             | 0.30     | 0.5835917     | 1  | 1.11   | 0.76            | 1.64            |  |
| CPSII     | 15      | 0.250 0.222 | 23 17 2 193 106 17       | 42 316               | 0.03     | 0.866735      | 1  | 1.14   | 0.25            | 5.11            |  |
| PBCS1     | 4       | 0.235 0.231 | 106 77 6 213 117 23      | 189 353              | 2.71     | 0.0995267     | 1  | 2.13   | 0.85            | 5.32            |  |
| PLCO      | 12      | 0.264 0.253 | 38 33 3 247 175 26       | 74 448               | 0.37     | 0.5427395     | 1  | 1.46   | 0.43            | 4.95            |  |
| WHI       | 12      | 0.264 0.247 | 160 114 21 986 654 103   | 295 1743             | 0.65     | 0.4216586     | 1  | 0.82   | 0.50            | 1.33            |  |
| STAGE3    | 13      | 0.241 0.235 | 306 190 32 931 595 80    | 528 1606             | 0.93     | 0.3346599     | 1  | 0.81   | 0.53            | 1.24            |  |
| NHS2      | 9       | 0.230 0.244 | 54 26 7 196 131 19       | 87 346               | 0.80     | 0.3699434     | 1  | 0.66   | 0.27            | 1.63            |  |
| PBCS2     | 13      | 0.230 0.225 | 202 124 17 427 240 39    | 343 706              | 0.15     | 0.701148      | 1  | 1.12   | 0.62            | 2.01            |  |

hom OR 95% CI\_l

| SUBSET   | Rank | MAF         | Geno Counts               | Subjects  | score X2 | score p-value | df | hom OR | hom OR 95% l | hom OR 95% Cl_u |
|----------|------|-------------|---------------------------|-----------|----------|---------------|----|--------|--------------|-----------------|
| STAGE1-3 | 22   | 0.385 0.386 | 428 533 168 1679 2133 657 | 1129 4469 | 0.02     | 0.8794025     | 1  | 0.99   | 0.82         | 1.18            |
| STAGE1-2 | 11   | 0.361 0.384 | 245 277 78 1078 1366 416  | 600 2860  | 0.97     | 0.3252171     | 1  | 1.14   | 0.88         | 1.48            |
| STAGE2   | 8    | 0.361 0.384 | 245 277 78 1078 1366 416  | 600 2860  | 0.97     | 0.3252171     | 1  | 1.14   | 0.88         | 1.48            |
| CPSII    | 7    | 0.369 0.413 | 18 17 7 96 179 41         | 42 316    | 0.44     | 0.5094254     | 1  | 0.75   | 0.31         | 1.79            |
| PBCS1    | 13   | 0.384 0.375 | 67 99 23 140 161 52       | 189 353   | 0.68     | 0.4104708     | 1  | 1.25   | 0.74         | 2.11            |
| PLCO     | 3    | 0.338 0.394 | 30 38 6 170 203 75        | 74 448    | 3.61     | 0.0574133     | 1  | 2.28   | 0.95         | 5.44            |
| WHI      | 22   | 0.351 0.378 | 130 123 42 672 823 248    | 295 1743  | 0.00     | 0.9967546     | 1  | 1.00   | 0.70         | 1.42            |
| STAGE3   | 9    | 0.412 0.388 | 183 257 90 601 769 241    | 530 1611  | 1.25     | 0.2641516     | 1  | 0.86   | 0.66         | 1.12            |
| NHS2     | 1    | 0.439 0.369 | 33 35 22 134 171 43       | 90 348    | 8.27     | 0.0040354     | 1  | 0.44   | 0.24         | 0.78            |
| PBCS2    | 10   | 0.411 0.398 | 111 181 50 263 330 118    | 342 711   | 0.67     | 0.4120977     | 1  | 1.16   | 0.81         | 1.66            |
| WHS      | 13   | 0.393 0.388 | 39 41 18 204 268 80       | 98 552    | 0.98     | 0.3232353     | 1  | 0.75   | 0.43         | 1.32            |
| PBCS 1+2 | 8    | 0.401 0.390 | 178 279 73 403 489 170    | 530 1062  | 1.36     | 0.2428145     | 1  | 1.19   | 0.89         | 1.60            |

hom OR 95% l

**Supplementary Table 4. Results of Combined Analysis of Multi-stage Analysis of Breast Cancer with Stages 1, 2 and 3 for 24 SNPs for ER+ Cases Compared to ER- Cases**

**Data dictionary**

Locus – dbSNP ID  
 Alleles – SNP alleles, listed as major|minor  
 Chr – chromosomal mapping  
 Location – chromosomal location based on NCBI genome build 36.3  
 Neighborhood – known protein-coding gene(s) within the vicinity, if the SNP lies within 20kb 5' of the start of transcription of the gene and 10kb 3' of the last exon.  
 SUBSET – Analytic subset of the data  
 Rank – p value rank relative to the 24 SNPs within each study.  
 MAF – Minor allele frequency (controls|cases)  
 Geno counts – genotype counts for each observed genotype (Major homozygote controls|heterozygote controls|minor homozygote controls/ Major homozygote cases|heterozygote cases|minor homozygote cases)  
 Subjects – number of subjects (controls|cases)  
 Score X2 – X<sup>2</sup> statistic for association by a Score test  
 Score p-value – significance level for X<sup>2</sup> statistic  
 df – degrees of freedom of X<sup>2</sup> statistic  
 het OR – Odds ratio for the heterozygote genotype (not included for recessive models)  
 het OR 95% CI\_l – lower bound of the 95% confidence interval of the Odds ratio  
 het OR 95% CI\_u – upper bound of the 95% confidence interval of the Odds ratio

**Supplementary Table results:**

adj\_gen0 – covariate adjusted, genotype-specific effect model  
 adj\_trend – covariate adjusted, trend effect model  
 adj\_rec – covariate adjusted, recessive effect model  
 unadj\_gen0 – unadjusted, genotype-specific effect model  
 unadj\_trend – unadjusted, trend effect model  
 unadj\_rec – unadjusted, recessive effect model

**adj\_gen0**

| Locus      | Alleles | Chr         | Location                  | Neighborhood        |          |               |    |        |                 |                 |        |                 |                 |  |  |
|------------|---------|-------------|---------------------------|---------------------|----------|---------------|----|--------|-----------------|-----------------|--------|-----------------|-----------------|--|--|
| rs11249433 | T C     | 1p11.2      |                           | 120982136 LOC647121 |          |               |    |        |                 |                 |        |                 |                 |  |  |
| SUBSET     | Rank    | MAF         | Geno Counts               | Subjects            | score X2 | score p-value | df | het OR | het OR 95% CI_l | het OR 95% CI_u | hom OR | hom OR 95% CI_l | hom OR 95% CI_u |  |  |
| STAGE1-3   | 1       | 0.397 0.441 | 474 598 209 1590 2476 993 | 1281 5059           | 10.55    | 0.0051129     | 2  | 1.18   | 1.02            | 1.35            | 1.34   | 1.11            | 1.61            |  |  |
| NHS        | 5       | 0.412 0.448 | 65 84 33 238 411 155      | 182 804             | 2.47     | 0.2908066     | 2  | 1.34   | 0.93            | 1.93            | 1.23   | 0.77            | 1.97            |  |  |
| STAGE1-2   | 2       | 0.402 0.443 | 270 373 121 1070 1756 674 | 764 3500            | 6.54     | 0.0379235     | 2  | 1.16   | 0.97            | 1.39            | 1.35   | 1.06            | 1.72            |  |  |
| STAGE2     | 4       | 0.399 0.442 | 205 289 88 832 1345 519   | 582 2696            | 5.38     | 0.0677939     | 2  | 1.12   | 0.91            | 1.37            | 1.39   | 1.05            | 1.84            |  |  |
| PBCS1      | 15      | 0.392 0.407 | 67 96 26 124 171 58       | 189 353             | 0.71     | 0.7017114     | 2  | 0.97   | 0.65            | 1.44            | 1.22   | 0.70            | 2.12            |  |  |
| PLCO       | 14      | 0.411 0.427 | 26 34 13 140 232 75       | 73 447              | 0.97     | 0.6148492     | 2  | 1.31   | 0.75            | 2.30            | 1.06   | 0.51            | 2.23            |  |  |
| WHI        | 1       | 0.396 0.455 | 105 145 44 514 857 359    | 294 1730            | 7.74     | 0.0208836     | 2  | 1.23   | 0.93            | 1.62            | 1.70   | 1.16            | 2.49            |  |  |
| STAGE3     | 3       | 0.388 0.436 | 204 225 88 520 720 319    | 517 1559            | 4.22     | 0.121492      | 2  | 1.20   | 0.96            | 1.50            | 1.32   | 0.98            | 1.78            |  |  |
| NHS2       | 22      | 0.453 0.446 | 27 40 19 107 147 72       | 86 326              | 0.07     | 0.9646276     | 2  | 0.93   | 0.53            | 1.62            | 0.96   | 0.49            | 1.86            |  |  |
| PBCS2      | 8       | 0.372 0.410 | 137 149 51 246 324 121    | 337 691             | 2.28     | 0.3194773     | 2  | 1.18   | 0.88            | 1.57            | 1.32   | 0.89            | 1.96            |  |  |
| WHS        | 2       | 0.383 0.462 | 40 36 18 167 249 126      | 94 542              | 5.97     | 0.0504395     | 2  | 1.78   | 1.07            | 2.94            | 1.75   | 0.94            | 3.25            |  |  |
| PBCS 1+2   | 7       | 0.379 0.409 | 204 245 77 370 495 179    | 526 1044            | 2.25     | 0.3248432     | 2  | 1.09   | 0.87            | 1.38            | 1.27   | 0.93            | 1.76            |  |  |
| Locus      | Alleles | Chr         | Location                  | Neighborhood        |          |               |    |        |                 |                 |        |                 |                 |  |  |
| rs12608723 | A G     | 19q13.11    |                           | 38508973            |          |               |    |        |                 |                 |        |                 |                 |  |  |
| SUBSET     | Rank    | MAF         | Geno Counts               | Subjects            | score X2 | score p-value | df | het OR | het OR 95% CI_l | het OR 95% CI_u | hom OR | hom OR 95% CI_l | hom OR 95% CI_u |  |  |
| STAGE1-3   | 2       | 0.132 0.121 | 984 274 33 3939 1089 75   | 1291 5103           | 8.47     | 0.0144555     | 2  | 0.97   | 0.83            | 1.13            | 0.53   | 0.35            | 0.82            |  |  |
| NHS        | 1       | 0.156 0.121 | 127 55 1 624 169 13       | 183 806             | 7.91     | 0.01912       | 2  | 0.63   | 0.44            | 0.91            | 3.03   | 0.39            | 23.66           |  |  |
| STAGE1-2   | 1       | 0.143 0.122 | 569 176 22 2710 757 49    | 767 3516            | 11.20    | 0.0036971     | 2  | 0.90   | 0.74            | 1.09            | 0.43   | 0.26            | 0.73            |  |  |
| STAGE2     | 1       | 0.140 0.122 | 442 121 21 2086 588 36    | 584 2710            | 17.30    | 1.76E-04      | 2  | 1.03   | 0.82            | 1.29            | 0.32   | 0.18            | 0.57            |  |  |



|          |    |             |                       |          |       |           |   |      |      |      |      |      |      |
|----------|----|-------------|-----------------------|----------|-------|-----------|---|------|------|------|------|------|------|
| PBCS1    | 9  | 0.135 0.110 | 142 43 4 278 72 3     | 189 353  | 2.05  | 0.3593345 | 2 | 0.84 | 0.54 | 1.29 | 0.40 | 0.09 | 1.81 |
| PLCO     | 1  | 0.162 0.116 | 57 10 7 348 96 4      | 74 448   | 24.70 | 4.34E-06  | 2 | 1.60 | 0.78 | 3.29 | 0.08 | 0.02 | 0.29 |
| WHI      | 10 | 0.137 0.126 | 222 65 8 1330 386 26  | 295 1742 | 2.40  | 0.3010898 | 2 | 1.00 | 0.74 | 1.35 | 0.53 | 0.24 | 1.20 |
| STAGE3   | 12 | 0.115 0.122 | 415 99 11 1229 335 26 | 525 1590 | 1.22  | 0.544215  | 2 | 1.12 | 0.86 | 1.44 | 0.79 | 0.38 | 1.64 |
| NHS2     | 4  | 0.138 0.118 | 67 16 4 261 69 5      | 87 335   | 3.30  | 0.1924519 | 2 | 1.15 | 0.62 | 2.12 | 0.32 | 0.08 | 1.25 |
| PBCS2    | 13 | 0.102 0.119 | 276 62 4 554 145 12   | 342 711  | 1.25  | 0.535561  | 2 | 1.16 | 0.83 | 1.62 | 1.55 | 0.49 | 4.91 |
| WHS      | 18 | 0.141 0.128 | 72 21 3 414 121 9     | 96 544   | 0.45  | 0.8003337 | 2 | 1.02 | 0.59 | 1.75 | 0.64 | 0.16 | 2.50 |
| PBCS 1+2 | 23 | 0.113 0.115 | 418 104 8 832 214 15  | 530 1061 | 0.04  | 0.9787857 | 2 | 1.02 | 0.79 | 1.33 | 0.96 | 0.40 | 2.29 |

Locus Alleles Chr Location Neighborhood  
rs2067980 A|G 5p12 45018074

| SUBSET   | Rank | MAF         | Geno Counts              | Subjects  | score X2 | score p-value | df | het OR | het OR 95% CI | het OR 95% CI | hom OR | hom OR 95% CI | hom OR 95% CI_u |
|----------|------|-------------|--------------------------|-----------|----------|---------------|----|--------|---------------|---------------|--------|---------------|-----------------|
| STAGE1-3 | 3    | 0.163 0.176 | 902 356 32 3497 1411 190 | 1290 5098 | 8.43     | 0.0147599     | 2  | 1.10   | 0.95          | 1.26          | 1.71   | 1.16          | 2.54            |
| NHS      | 20   | 0.172 0.179 | 125 53 5 542 240 24      | 183 806   | 0.07     | 0.9645866     | 2  | 1.05   | 0.73          | 1.50          | 1.06   | 0.39          | 2.85            |
| STAGE1-2 | 7    | 0.170 0.175 | 530 213 24 2412 975 129  | 767 3516  | 2.77     | 0.2504594     | 2  | 1.11   | 0.93          | 1.33          | 1.36   | 0.86          | 2.16            |
| STAGE2   | 6    | 0.170 0.174 | 405 160 19 1870 735 105  | 584 2710  | 2.87     | 0.237774      | 2  | 1.13   | 0.92          | 1.39          | 1.44   | 0.86          | 2.40            |
| PBCS1    | 13   | 0.251 0.231 | 107 69 13 208 127 18     | 189 353   | 1.04     | 0.5948531     | 2  | 0.96   | 0.66          | 1.41          | 1.06   | 0.31          | 1.45            |
| PLCO     | 11   | 0.122 0.156 | 57 16 1 322 112 14       | 74 448    | 1.37     | 0.5038133     | 2  | 1.25   | 0.68          | 2.29          | 2.71   | 0.34          | 21.31           |
| WHI      | 3    | 0.134 0.170 | 221 69 5 1216 460 66     | 295 1742  | 5.36     | 0.0687183     | 2  | 1.24   | 0.93          | 1.66          | 2.41   | 0.96          | 6.06            |
| STAGE3   | 1    | 0.152 0.177 | 372 143 8 1085 437 61    | 523 1583  | 7.54     | 0.0230855     | 2  | 1.07   | 0.85          | 1.34          | 2.77   | 1.30          | 5.90            |
| NHS2     | 23   | 0.149 0.161 | 59 25 0 240 79 14        | 84 333    |          |               |    |        |               |               |        |               |                 |
| PBCS2    | 5    | 0.156 0.188 | 243 93 7 467 211 27      | 343 705   | 3.60     | 0.1653609     | 2  | 1.16   | 0.86          | 1.55          | 2.08   | 0.89          | 4.87            |
| WHS      | 11   | 0.141 0.172 | 70 25 1 378 147 20       | 96 545    | 2.54     | 0.2812215     | 2  | 1.20   | 0.72          | 2.00          | 4.21   | 0.54          | 32.55           |
| PBCS 1+2 | 15   | 0.190 0.202 | 350 162 20 675 337 45    | 532 1057  | 0.91     | 0.6336242     | 2  | 1.09   | 0.87          | 1.38          | 1.21   | 0.70          | 2.09            |

Locus Alleles Chr Location Neighborhood  
rs7716600 C|A 5p12 44910762

| SUBSET   | Rank | MAF         | Geno Counts              | Subjects  | score X2 | score p-value | df | het OR | het OR 95% CI | het OR 95% CI | hom OR | hom OR 95% CI | hom OR 95% CI_u |
|----------|------|-------------|--------------------------|-----------|----------|---------------|----|--------|---------------|---------------|--------|---------------|-----------------|
| STAGE1-3 | 4    | 0.220 0.243 | 787 439 65 2950 1835 322 | 1291 5107 | 6.72     | 0.0347923     | 2  | 1.14   | 1.00          | 1.30          | 1.35   | 1.01          | 1.79            |
| NHS      | 11   | 0.246 0.253 | 108 60 15 451 303 53     | 183 807   | 1.74     | 0.4186214     | 2  | 1.21   | 0.85          | 1.72          | 0.85   | 0.46          | 1.57            |
| STAGE1-2 | 4    | 0.225 0.248 | 465 259 43 2015 1256 243 | 767 3514  | 5.99     | 0.0500419     | 2  | 1.18   | 1.00          | 1.41          | 1.38   | 0.98          | 1.95            |
| STAGE2   | 2    | 0.218 0.246 | 357 199 28 1564 953 190  | 584 2707  | 7.20     | 0.0273783     | 2  | 1.18   | 0.97          | 1.43          | 1.67   | 1.09          | 2.55            |
| PBCS1    | 20   | 0.272 0.272 | 99 77 13 186 139 26      | 189 351   | 0.04     | 0.9797937     | 2  | 0.97   | 0.67          | 1.41          | 1.03   | 0.50          | 2.11            |
| PLCO     | 5    | 0.169 0.232 | 52 19 3 261 166 21       | 74 448    | 4.48     | 0.1065865     | 2  | 1.81   | 1.02          | 3.20          | 1.61   | 0.45          | 5.70            |
| WHI      | 2    | 0.200 0.248 | 188 96 11 1010 600 131   | 295 1741  | 6.95     | 0.0309457     | 2  | 1.18   | 0.91          | 1.55          | 2.20   | 1.17          | 4.16            |
| STAGE3   | 15   | 0.214 0.231 | 322 180 22 936 581 78    | 524 1595  | 0.93     | 0.6288917     | 2  | 1.07   | 0.86          | 1.33          | 1.23   | 0.75          | 2.04            |
| NHS2     | 11   | 0.267 0.230 | 46 34 6 198 126 15       | 86 339    | 1.38     | 0.5016455     | 2  | 0.85   | 0.51          | 1.40          | 0.57   | 0.20          | 1.58            |
| PBCS2    | 4    | 0.195 0.233 | 219 111 11 417 254 38    | 341 709   | 3.77     | 0.1521629     | 2  | 1.18   | 0.89          | 1.55          | 1.83   | 0.91          | 3.67            |
| WHS      | 23   | 0.232 0.229 | 57 35 5 321 201 25       | 97 547    | 0.09     | 0.9555902     | 2  | 1.03   | 0.65          | 1.65          | 0.88   | 0.32          | 2.45            |
| PBCS 1+2 | 6    | 0.223 0.246 | 318 188 24 602 391 65    | 530 1058  | 2.83     | 0.2428173     | 2  | 1.11   | 0.89          | 1.38          | 1.48   | 0.90          | 2.42            |

Locus Alleles Chr Location Neighborhood  
rs9491859 C|A 6q22.33 128106056 C6orf190

| SUBSET   | Rank | MAF         | Geno Counts               | Subjects  | score X2 | score p-value | df | het OR | het OR 95% CI | het OR 95% CI | hom OR | hom OR 95% CI | hom OR 95% CI_u |
|----------|------|-------------|---------------------------|-----------|----------|---------------|----|--------|---------------|---------------|--------|---------------|-----------------|
| STAGE1-3 | 5    | 0.357 0.377 | 525 602 158 2017 2314 764 | 1285 5095 | 5.11     | 0.0775671     | 2  | 0.98   | 0.85          | 1.12          | 1.22   | 1.00          | 1.50            |
| NHS      | 13   | 0.388 0.375 | 67 90 26 325 359 123      | 183 807   | 1.55     | 0.4596208     | 2  | 0.80   | 0.56          | 1.14          | 0.92   | 0.56          | 1.53            |
| STAGE1-2 | 11   | 0.374 0.377 | 301 359 107 1401 1579 536 | 767 3516  | 1.85     | 0.3959278     | 2  | 0.92   | 0.77          | 1.09          | 1.06   | 0.83          | 1.36            |
| STAGE2   | 15   | 0.369 0.378 | 234 269 81 1076 1220 413  | 584 2709  | 1.03     | 0.5961763     | 2  | 0.95   | 0.78          | 1.16          | 1.10   | 0.82          | 1.46            |
| PBCS1    | 17   | 0.354 0.364 | 83 78 28 147 154 51       | 189 352   | 0.46     | 0.7962781     | 2  | 1.14   | 0.77          | 1.68          | 1.03   | 0.60          | 1.78            |
| PLCO     | 19   | 0.378 0.376 | 29 34 11 170 219 59       | 74 448    | 0.36     | 0.8339806     | 2  | 1.07   | 0.62          | 1.84          | 0.84   | 0.39          | 1.84            |
| WHI      | 14   | 0.385 0.384 | 110 143 42 682 781 279    | 295 1742  | 1.75     | 0.4167162     | 2  | 0.88   | 0.67          | 1.15          | 1.10   | 0.75          | 1.61            |
| STAGE3   | 2    | 0.333 0.377 | 224 243 51 617 735 228    | 518 1580  | 6.22     | 0.044653      | 2  | 1.07   | 0.87          | 1.33          | 1.55   | 1.10          | 2.19            |
| NHS2     | 8    | 0.335 0.371 | 35 39 8 139 147 52        | 82 338    | 1.74     | 0.4198622     | 2  | 0.96   | 0.57          | 1.61          | 1.65   | 0.72          | 3.81            |
| PBCS2    | 7    | 0.335 0.365 | 146 160 34 286 322 96     | 340 704   | 2.45     | 0.2936053     | 2  | 1.02   | 0.77          | 1.35          | 1.41   | 0.90          | 2.19            |

|          |    |             |                        |          |      |           |   |      |      |      |      |      |      |
|----------|----|-------------|------------------------|----------|------|-----------|---|------|------|------|------|------|------|
| WHS      | 3  | 0.323 0.396 | 43 44 9 192 266 80     | 96 538   | 5.62 | 0.0601184 | 2 | 1.45 | 0.90 | 2.32 | 2.41 | 1.09 | 5.33 |
| PBCS 1+2 | 10 | 0.342 0.365 | 229 238 62 432 476 147 | 529 1055 | 1.77 | 0.4121494 | 2 | 1.06 | 0.85 | 1.33 | 1.26 | 0.90 | 1.77 |

Locus rs3817198 Alleles T|C Chr 11p15.5 Location Neighborhood 1865582 LSP1

| SUBSET   | Rank | MAF         | Geno Counts               | Subjects  | score X2 | score p-value | df | het OR | het OR 95% CI | het OR 95% CI | hom OR | hom OR 95% CI | hom OR 95% CI_u |
|----------|------|-------------|---------------------------|-----------|----------|---------------|----|--------|---------------|---------------|--------|---------------|-----------------|
| STAGE1-3 | 6    | 0.323 0.335 | 582 578 126 2294 2211 606 | 1286 5111 | 4.95     | 0.0843582     | 2  | 0.96   | 0.84          | 1.09          | 1.22   | 0.98          | 1.52            |
| NHS      | 3    | 0.308 0.328 | 82 88 12 373 339 95       | 182 807   | 5.43     | 0.0663027     | 2  | 0.84   | 0.60          | 1.18          | 1.77   | 0.92          | 3.39            |
| STAGE1-2 | 5    | 0.334 0.337 | 329 359 76 1564 1530 419  | 764 3513  | 4.61     | 0.0999785     | 2  | 0.88   | 0.74          | 1.04          | 1.15   | 0.87          | 1.52            |
| STAGE2   | 12   | 0.343 0.340 | 247 271 64 1191 1191 324  | 582 2706  | 1.72     | 0.4227453     | 2  | 0.89   | 0.73          | 1.08          | 1.02   | 0.75          | 1.40            |
| PBCS1    | 16   | 0.321 0.326 | 84 86 17 161 150 39       | 187 350   | 0.69     | 0.7083879     | 2  | 0.91   | 0.62          | 1.33          | 1.18   | 0.62          | 2.22            |
| PLCO     | 18   | 0.365 0.334 | 28 38 8 190 215 42        | 74 447    | 0.56     | 0.7576367     | 2  | 0.83   | 0.48          | 1.42          | 0.80   | 0.33          | 1.91            |
| WHI      | 16   | 0.346 0.343 | 126 134 35 768 753 221    | 295 1742  | 0.80     | 0.671015      | 2  | 0.91   | 0.70          | 1.18          | 1.06   | 0.70          | 1.59            |
| STAGE3   | 7    | 0.308 0.331 | 252 220 51 727 682 187    | 523 1596  | 2.60     | 0.2730167     | 2  | 1.09   | 0.88          | 1.35          | 1.32   | 0.93          | 1.88            |
| NHS2     | 2    | 0.259 0.324 | 50 29 8 160 145 39        | 87 344    | 4.54     | 0.1032702     | 2  | 1.69   | 1.00          | 2.84          | 1.70   | 0.73          | 3.93            |
| PBCS2    | 22   | 0.333 0.330 | 154 148 40 326 301 84     | 342 711   | 0.10     | 0.9530065     | 2  | 0.96   | 0.73          | 1.26          | 0.99   | 0.64          | 1.51            |
| WHS      | 4    | 0.261 0.336 | 48 43 3 241 236 64        | 94 541    | 4.59     | 0.1007349     | 2  | 1.07   | 0.67          | 1.70          | 3.48   | 1.04          | 11.62           |
| PBCS 1+2 | 19   | 0.327 0.327 | 239 233 56 490 450 123    | 528 1063  | 0.46     | 0.7926438     | 2  | 0.94   | 0.76          | 1.18          | 1.05   | 0.74          | 1.50            |

Locus rs17740709 Alleles A|G Chr 12q21.31 Location Neighborhood 81947471 TMT2C

| SUBSET   | Rank | MAF         | Geno Counts              | Subjects  | score X2 | score p-value | df | het OR | het OR 95% CI | het OR 95% CI | hom OR | hom OR 95% CI | hom OR 95% CI_u |
|----------|------|-------------|--------------------------|-----------|----------|---------------|----|--------|---------------|---------------|--------|---------------|-----------------|
| STAGE1-3 | 7    | 0.210 0.220 | 811 412 65 3142 1658 292 | 1288 5092 | 4.02     | 0.1343172     | 2  | 1.10   | 0.96          | 1.27          | 1.27   | 0.95          | 1.69            |
| NHS      | 2    | 0.180 0.222 | 121 58 4 502 251 54      | 183 807   | 5.80     | 0.0551574     | 2  | 1.12   | 0.79          | 1.59          | 3.32   | 1.17          | 9.39            |
| STAGE1-2 | 17   | 0.213 0.217 | 481 246 40 2194 1121 202 | 767 3517  | 1.09     | 0.5795949     | 2  | 1.05   | 0.88          | 1.25          | 1.20   | 0.83          | 1.72            |
| STAGE2   | 21   | 0.223 0.215 | 360 188 36 1692 870 148  | 584 2710  | 0.22     | 0.8963695     | 2  | 1.04   | 0.85          | 1.26          | 0.95   | 0.64          | 1.41            |
| PBCS1    | 18   | 0.254 0.245 | 106 70 13 203 127 23     | 189 353   | 0.27     | 0.8725775     | 2  | 0.90   | 0.62          | 1.32          | 0.98   | 0.47          | 2.04            |
| PLCO     | 16   | 0.209 0.218 | 48 21 5 277 147 24       | 74 448    | 0.71     | 0.7003303     | 2  | 1.26   | 0.72          | 2.20          | 0.92   | 0.32          | 2.63            |
| WHI      | 22   | 0.212 0.210 | 187 91 17 1105 544 93    | 295 1742  | 0.10     | 0.9516416     | 2  | 1.02   | 0.77          | 1.33          | 0.93   | 0.54          | 1.60            |
| STAGE3   | 4    | 0.207 0.228 | 330 166 25 948 539 90    | 521 1577  | 4.08     | 0.1298607     | 2  | 1.20   | 0.96          | 1.49          | 1.42   | 0.89          | 2.27            |
| NHS2     | 18   | 0.204 0.212 | 53 23 5 207 109 16       | 81 332    | 0.85     | 0.6536034     | 2  | 1.27   | 0.73          | 2.19          | 0.88   | 0.30          | 2.54            |
| PBCS2    | 2    | 0.212 0.254 | 215 109 18 398 260 50    | 342 708   | 4.53     | 0.1037762     | 2  | 1.29   | 0.98          | 1.71          | 1.52   | 0.86          | 2.67            |
| WHS      | 13   | 0.194 0.203 | 62 34 2 343 170 24       | 98 537    | 1.17     | 0.5570469     | 2  | 0.90   | 0.56          | 1.44          | 1.99   | 0.45          | 8.71            |
| PBCS 1+2 | 8    | 0.227 0.251 | 321 179 31 601 385 73    | 531 1059  | 2.21     | 0.3304089     | 2  | 1.15   | 0.92          | 1.44          | 1.28   | 0.82          | 2.00            |

Locus rs2391406 Alleles T|G Chr 13q33.3 Location Neighborhood 106586873

| SUBSET   | Rank | MAF         | Geno Counts               | Subjects  | score X2 | score p-value | df | het OR | het OR 95% CI | het OR 95% CI | hom OR | hom OR 95% CI | hom OR 95% CI_u |
|----------|------|-------------|---------------------------|-----------|----------|---------------|----|--------|---------------|---------------|--------|---------------|-----------------|
| STAGE1-3 | 8    | 0.360 0.367 | 511 627 150 2027 2376 676 | 1288 5079 | 3.91     | 0.1413239     | 2  | 0.98   | 0.86          | 1.13          | 1.20   | 0.98          | 1.48            |
| NHS      | 15   | 0.358 0.366 | 72 91 20 323 377 107      | 183 807   | 0.80     | 0.6719342     | 2  | 0.95   | 0.67          | 1.34          | 1.21   | 0.70          | 2.09            |
| STAGE1-2 | 16   | 0.354 0.364 | 308 373 85 1393 1684 438  | 766 3515  | 1.24     | 0.5368829     | 2  | 1.02   | 0.86          | 1.21          | 1.16   | 0.89          | 1.52            |
| STAGE2   | 17   | 0.353 0.364 | 236 282 65 1070 1307 331  | 583 2708  | 0.73     | 0.693187      | 2  | 1.05   | 0.86          | 1.27          | 1.14   | 0.84          | 1.55            |
| PBCS1    | 5    | 0.362 0.375 | 78 84 26 125 190 37       | 188 352   | 4.29     | 0.1172873     | 2  | 1.41   | 0.96          | 2.08          | 0.89   | 0.50          | 1.60            |
| PLCO     | 7    | 0.345 0.360 | 29 39 6 180 213 55        | 74 448    | 2.24     | 0.3268681     | 2  | 0.81   | 0.47          | 1.38          | 1.59   | 0.61          | 4.13            |
| WHI      | 15   | 0.344 0.365 | 123 141 31 693 828 221    | 295 1742  | 1.24     | 0.5387771     | 2  | 1.04   | 0.80          | 1.35          | 1.27   | 0.83          | 1.94            |
| STAGE3   | 6    | 0.368 0.373 | 203 253 65 634 693 238    | 521 1565  | 3.70     | 0.1570399     | 2  | 0.93   | 0.75          | 1.16          | 1.27   | 0.92          | 1.75            |
| NHS2     | 12   | 0.359 0.392 | 34 41 10 129 154 56       | 85 339    | 1.12     | 0.5706178     | 2  | 0.97   | 0.58          | 1.63          | 1.45   | 0.67          | 3.17            |
| PBCS2    | 10   | 0.382 0.381 | 126 171 45 275 321 108    | 342 704   | 1.94     | 0.3781395     | 2  | 0.88   | 0.67          | 1.17          | 1.15   | 0.76          | 1.74            |
| WHS      | 15   | 0.324 0.351 | 43 41 10 230 218 74       | 94 522    | 1.09     | 0.5808855     | 2  | 0.93   | 0.57          | 1.50          | 1.38   | 0.65          | 2.94            |
| PBCS 1+2 | 22   | 0.375 0.379 | 204 256 71 400 510 145    | 531 1055  | 0.15     | 0.9266451     | 2  | 1.03   | 0.82          | 1.29          | 1.06   | 0.76          | 1.49            |

Locus rs7936636 Alleles C|T Chr 11p11.2 Location Neighborhood 44397546

| SUBSET   | Rank | MAF         | Geno Counts              | Subjects  | score X2 | score p-value | df | het OR | het OR 95% CI | het OR 95% CI | hom OR | hom OR 95% CI | hom OR 95% CI_u |       |
|----------|------|-------------|--------------------------|-----------|----------|---------------|----|--------|---------------|---------------|--------|---------------|-----------------|-------|
| STAGE1-3 | 9    | 0.234 0.250 | 759 457 74 2885 1879 337 | 1290 5101 | 3.48     | 0.1753344     | 2  | 1.10   | 0.96          | 1.25          | 1.23   | 1.23          | 0.94            | 1.62  |
| NHS      | 4    | 0.219 0.247 | 110 66 7 470 276 61      | 183 807   | 3.29     | 0.1932579     | 2  | 0.99   | 0.70          | 1.39          | 2.06   | 2.06          | 0.91            | 4.64  |
| STAGE1-2 | 8    | 0.226 0.247 | 465 258 44 2020 1258 238 | 767 3516  | 2.68     | 0.2614318     | 2  | 1.12   | 0.94          | 1.32          | 1.25   | 1.25          | 0.88            | 1.76  |
| STAGE2   | 10   | 0.228 0.247 | 355 192 37 1550 982 177  | 584 2709  | 2.20     | 0.3335088     | 2  | 1.16   | 0.95          | 1.41          | 1.08   | 1.08          | 0.74            | 1.59  |
| PBCS1    | 21   | 0.228 0.229 | 115 62 12 212 119 21     | 189 352   | 0.01     | 0.9927774     | 2  | 1.02   | 0.69          | 1.50          | 0.97   | 0.97          | 0.46            | 2.06  |
| PLCO     | 8    | 0.243 0.253 | 45 22 7 254 161 33       | 74 448    | 2.17     | 0.3374824     | 2  | 1.40   | 0.80          | 2.46          | 0.76   | 0.76          | 0.31            | 1.85  |
| WHI      | 9    | 0.219 0.249 | 181 99 15 983 649 110    | 295 1742  | 3.01     | 0.2218891     | 2  | 1.23   | 0.94          | 1.60          | 1.37   | 1.37          | 0.78            | 2.42  |
| STAGE3   | 17   | 0.248 0.258 | 294 199 30 865 621 98    | 523 1584  | 0.78     | 0.6774027     | 2  | 1.07   | 0.86          | 1.32          | 1.18   | 1.18          | 0.76            | 1.84  |
| NHS2     | 13   | 0.244 0.239 | 47 33 4 198 117 22       | 84 337    | 0.96     | 0.6179407     | 2  | 0.84   | 0.50          | 1.39          | 1.37   | 1.37          | 0.45            | 4.21  |
| PBCS2    | 20   | 0.265 0.268 | 185 133 24 372 282 47    | 342 701   | 0.19     | 0.9080807     | 2  | 1.04   | 0.79          | 1.37          | 0.94   | 0.94          | 0.55            | 1.59  |
| WHS      | 6    | 0.191 0.256 | 62 33 2 295 222 29       | 97 546    | 3.96     | 0.1379955     | 2  | 1.37   | 0.86          | 2.18          | 3.28   | 3.28          | 0.74            | 14.51 |
| PBCS 1+2 | 21   | 0.251 0.256 | 300 195 36 584 401 69    | 531 1054  | 0.15     | 0.9260738     | 2  | 1.04   | 0.83          | 1.30          | 0.97   | 0.97          | 0.63            | 1.49  |

Locus Alleles Chr Location Neighborhood  
rs7121523 G|A 11p15.4 7556781 PPFIBP2

| SUBSET   | Rank | MAF         | Geno Counts              | Subjects  | score X2 | score p-value | df | het OR | het OR 95% CI | het OR 95% CI | hom OR | hom OR 95% CI | hom OR 95% CI_u |       |
|----------|------|-------------|--------------------------|-----------|----------|---------------|----|--------|---------------|---------------|--------|---------------|-----------------|-------|
| STAGE1-3 | 10   | 0.162 0.160 | 908 352 33 3629 1305 166 | 1293 5100 | 3.03     | 0.2202626     | 2  | 0.91   | 0.79          | 1.05          | 1.23   | 1.23          | 0.83            | 1.81  |
| NHS      | 14   | 0.164 0.168 | 129 48 6 572 199 36      | 183 807   | 0.89     | 0.641312      | 2  | 0.93   | 0.64          | 1.35          | 1.45   | 1.45          | 0.59            | 3.54  |
| STAGE1-2 | 3    | 0.175 0.161 | 522 222 23 2508 881 126  | 767 3515  | 6.40     | 0.0407519     | 2  | 0.81   | 0.67          | 0.97          | 1.17   | 1.17          | 0.74            | 1.86  |
| STAGE2   | 3    | 0.178 0.159 | 393 174 17 1936 682 90   | 584 2708  | 6.67     | 0.0356099     | 2  | 0.77   | 0.63          | 0.94          | 1.08   | 1.08          | 0.63            | 1.87  |
| PBCS1    | 1    | 0.148 0.156 | 134 54 1 259 76 17       | 189 352   | 9.35     | 0.0093328     | 2  | 0.74   | 0.49          | 1.12          | 9.20   | 1.20          | 1.20            | 70.38 |
| PLCO     | 2    | 0.230 0.160 | 41 32 1 318 117 13       | 74 448    | 9.60     | 0.0082449     | 2  | 0.45   | 0.27          | 0.77          | 1.61   | 1.61          | 0.20            | 12.86 |
| WHI      | 5    | 0.186 0.157 | 200 80 15 1244 446 51    | 295 1741  | 4.85     | 0.0882698     | 2  | 0.89   | 0.67          | 1.18          | 0.52   | 0.52          | 0.29            | 0.96  |
| STAGE3   | 14   | 0.143 0.159 | 386 130 10 1121 424 40   | 526 1585  | 1.15     | 0.5619598     | 2  | 1.10   | 0.87          | 1.39          | 1.32   | 1.32          | 0.64            | 2.70  |
| NHS2     | 20   | 0.161 0.151 | 61 24 2 246 82 10        | 87 338    | 0.56     | 0.756637      | 2  | 0.83   | 0.48          | 1.42          | 1.18   | 1.18          | 0.25            | 5.58  |
| PBCS2    | 12   | 0.136 0.158 | 254 81 6 496 184 18      | 341 698   | 1.67     | 0.4331115     | 2  | 1.17   | 0.87          | 1.59          | 1.51   | 1.51          | 0.59            | 3.85  |
| WHS      | 20   | 0.148 0.166 | 71 25 2 379 158 12       | 98 549    | 0.28     | 0.8700328     | 2  | 1.14   | 0.69          | 1.89          | 1.10   | 1.10          | 0.23            | 5.29  |
| PBCS 1+2 | 2    | 0.141 0.157 | 388 135 7 755 260 35     | 530 1050  | 5.51     | 0.0635424     | 2  | 1.01   | 0.79          | 1.29          | 2.59   | 2.59          | 1.14            | 5.91  |

Locus Alleles Chr Location Neighborhood  
rs10941679 A|G 5p12 44742255

| SUBSET   | Rank | MAF         | Geno Counts            | Subjects | score X2 | score p-value | df | het OR | het OR 95% CI | het OR 95% CI | hom OR | hom OR 95% CI | hom OR 95% CI_u |      |
|----------|------|-------------|------------------------|----------|----------|---------------|----|--------|---------------|---------------|--------|---------------|-----------------|------|
| STAGE1-3 | 11   | 0.264 0.282 | 378 275 47 978 787 146 | 700 1911 | 2.68     | 0.2624433     | 2  | 1.14   | 0.94          | 1.37          | 1.24   | 1.24          | 0.87            | 1.78 |
| STAGE3   | 5    | 0.247 0.278 | 293 197 30 817 646 116 | 520 1579 | 3.74     | 0.1540798     | 2  | 1.19   | 0.96          | 1.47          | 1.37   | 1.37          | 0.89            | 2.10 |
| NHS2     | 14   | 0.268 0.285 | 46 28 8 173 133 29     | 82 335   | 0.94     | 0.6253208     | 2  | 1.27   | 0.75          | 2.14          | 0.93   | 0.93          | 0.39            | 2.20 |
| PBCS2    | 1    | 0.235 0.288 | 196 130 15 350 308 50  | 341 708  | 6.24     | 0.0441587     | 2  | 1.29   | 0.98          | 1.70          | 1.85   | 1.85          | 1.01            | 3.40 |
| WHS      | 22   | 0.273 0.260 | 51 39 7 294 205 37     | 97 536   | 0.11     | 0.9460915     | 2  | 0.93   | 0.58          | 1.48          | 0.91   | 0.91          | 0.38            | 2.20 |
| PBCS 1+2 | 3    | 0.261 0.293 | 281 208 32 511 449 80  | 521 1040 | 3.69     | 0.1578836     | 2  | 1.18   | 0.95          | 1.47          | 1.41   | 1.41          | 0.91            | 2.19 |

Locus Alleles Chr Location Neighborhood  
rs999737 C|T 14q24.1 68104435 RAD51L1

| SUBSET   | Rank | MAF         | Geno Counts              | Subjects  | score X2 | score p-value | df | het OR | het OR 95% CI | het OR 95% CI | hom OR | hom OR 95% CI | hom OR 95% CI_u |      |
|----------|------|-------------|--------------------------|-----------|----------|---------------|----|--------|---------------|---------------|--------|---------------|-----------------|------|
| STAGE1-3 | 12   | 0.228 0.215 | 760 466 61 3130 1743 227 | 1287 5100 | 1.87     | 0.393286      | 2  | 0.92   | 0.80          | 1.05          | 0.90   | 0.90          | 0.67            | 1.22 |
| NHS      | 7    | 0.239 0.209 | 105 67 10 499 278 30     | 182 807   | 2.02     | 0.3639906     | 2  | 0.87   | 0.61          | 1.22          | 0.61   | 0.61          | 0.29            | 1.30 |
| STAGE1-2 | 14   | 0.224 0.211 | 459 271 36 2185 1182 150 | 766 3517  | 1.55     | 0.4599425     | 2  | 0.92   | 0.77          | 1.09          | 0.85   | 0.85          | 0.58            | 1.24 |
| STAGE2   | 18   | 0.219 0.211 | 354 204 26 1686 904 120  | 584 2710  | 0.49     | 0.7810228     | 2  | 0.94   | 0.77          | 1.14          | 0.93   | 0.93          | 0.59            | 1.46 |
| PBCS1    | 3    | 0.228 0.203 | 115 62 12 219 125 9      | 189 353   | 5.19     | 0.0745158     | 2  | 1.05   | 0.71          | 1.54          | 0.38   | 0.38          | 0.15            | 0.93 |
| PLCO     | 12   | 0.189 0.225 | 48 24 2 262 170 16       | 74 448    | 1.17     | 0.5583721     | 2  | 1.31   | 0.76          | 2.24          | 1.56   | 1.56          | 0.34            | 7.16 |
| WHI      | 8    | 0.224 0.208 | 174 110 11 1100 559 83   | 295 1742  | 3.40     | 0.1827064     | 2  | 0.80   | 0.61          | 1.04          | 1.17   | 1.17          | 0.61            | 2.25 |
| STAGE3   | 21   | 0.235 0.226 | 302 195 25 946 562 77    | 522 1585  | 0.59     | 0.7453887     | 2  | 0.92   | 0.74          | 1.14          | 1.01   | 1.01          | 0.62            | 1.64 |
| NHS2     | 16   | 0.212 0.233 | 52 30 3 198 115 20       | 85 333    | 0.87     | 0.6460004     | 2  | 1.04   | 0.62          | 1.73          | 1.81   | 1.81          | 0.51            | 6.36 |
| PBCS2    | 19   | 0.234 0.224 | 198 125 17 422 248 34    | 340 704   | 0.20     | 0.9065793     | 2  | 0.94   | 0.71          | 1.24          | 0.98   | 0.98          | 0.53            | 1.81 |
| WHS      | 12   | 0.258 0.224 | 52 40 5 326 199 23       | 97 548    | 1.21     | 0.5467911     | 2  | 0.80   | 0.50          | 1.27          | 0.69   | 0.69          | 0.24            | 1.94 |

PBCS 1+2 12 0.232|0.217 312|187|29|640|372|43 528|1055 1.70 0.4275291 2 0.97 0.78 1.21 0.72 0.44 1.18

Locus Alleles Chr Location Neighborhood  
rs4415084 C|T 5p12 44698272

| SUBSET   | Rank | MAF         | Geno Counts               | Subjects  | score X2 | score p-value | df | het OR | het OR 95% CI | het OR 95% CI | hom OR | hom OR 95% CI | hom OR 95% CI_u |
|----------|------|-------------|---------------------------|-----------|----------|---------------|----|--------|---------------|---------------|--------|---------------|-----------------|
| STAGE1-3 | 13   | 0.422 0.431 | 434 623 232 1673 2433 970 | 1289 5076 | 1.75     | 0.4172092     | 2  | 1.05   | 0.92          | 1.21          | 1.13   | 0.94          | 1.36            |
| NHS      | 8    | 0.448 0.437 | 57 87 38 240 421 139      | 182 800   | 1.92     | 0.3837581     | 2  | 1.13   | 0.78          | 1.64          | 0.84   | 0.53          | 1.34            |
| STAGE1-2 | 9    | 0.422 0.429 | 264 358 144 1154 1698 657 | 766 3509  | 2.49     | 0.2882352     | 2  | 1.15   | 0.96          | 1.38          | 1.12   | 0.89          | 1.41            |
| STAGE2   | 7    | 0.414 0.427 | 207 271 106 914 1277 518  | 584 2709  | 2.72     | 0.2564767     | 2  | 1.15   | 0.94          | 1.41          | 1.22   | 0.93          | 1.59            |
| PBCS1    | 7    | 0.476 0.463 | 55 88 46 97 185 71        | 189 353   | 2.38     | 0.3040895     | 2  | 1.20   | 0.78          | 1.83          | 0.84   | 0.51          | 1.40            |
| PLCO     | 3    | 0.338 0.407 | 28 42 4 163 205 80        | 74 448    | 7.99     | 0.0184327     | 2  | 0.81   | 0.47          | 1.38          | 3.41   | 1.15          | 10.14           |
| WHI      | 13   | 0.402 0.429 | 111 131 53 588 813 340    | 295 1741  | 2.14     | 0.342892      | 2  | 1.19   | 0.90          | 1.57          | 1.25   | 0.88          | 1.78            |
| STAGE3   | 8    | 0.422 0.435 | 171 265 89 520 739 315    | 525 1574  | 2.33     | 0.3111454     | 2  | 0.93   | 0.74          | 1.16          | 1.15   | 0.85          | 1.55            |
| NHS2     | 17   | 0.403 0.449 | 31 43 14 105 156 71       | 88 332    | 0.86     | 0.6520049     | 2  | 1.06   | 0.63          | 1.81          | 1.39   | 0.68          | 2.81            |
| PBCS2    | 14   | 0.413 0.440 | 117 165 58 226 346 140    | 340 712   | 1.21     | 0.5466509     | 2  | 1.10   | 0.82          | 1.47          | 1.24   | 0.84          | 1.81            |
| WHS      | 1    | 0.469 0.420 | 23 57 17 189 237 104      | 97 530    | 7.21     | 0.0271773     | 2  | 0.49   | 0.29          | 0.84          | 0.74   | 0.37          | 1.47            |
| PBCS 1+2 | 16   | 0.435 0.447 | 171 253 103 322 527 209   | 527 1058  | 0.84     | 0.6578156     | 2  | 1.12   | 0.88          | 1.42          | 1.08   | 0.80          | 1.46            |

Locus Alleles Chr Location Neighborhood  
rs10850145 C|T 12q24.13 112428512

| SUBSET   | Rank | MAF         | Geno Counts              | Subjects  | score X2 | score p-value | df | het OR | het OR 95% CI | het OR 95% CI | hom OR | hom OR 95% CI | hom OR 95% CI_u |
|----------|------|-------------|--------------------------|-----------|----------|---------------|----|--------|---------------|---------------|--------|---------------|-----------------|
| STAGE1-3 | 14   | 0.108 0.109 | 1029 245 17 4054 1012 52 | 1291 5118 | 1.68     | 0.4318629     | 2  | 1.05   | 0.90          | 1.23          | 0.73   | 0.41          | 1.28            |
| NHS      | 6    | 0.117 0.108 | 145 33 5 642 155 10      | 183 807   | 2.31     | 0.3148011     | 2  | 1.03   | 0.67          | 1.58          | 0.44   | 0.15          | 1.33            |
| STAGE1-2 | 19   | 0.108 0.110 | 612 144 11 2781 693 41   | 767 3515  | 0.97     | 0.6149517     | 2  | 1.07   | 0.87          | 1.31          | 0.78   | 0.39          | 1.55            |
| STAGE2   | 19   | 0.105 0.111 | 467 111 6 2139 538 31    | 584 2708  | 0.48     | 0.7850317     | 2  | 1.08   | 0.86          | 1.37          | 1.08   | 0.44          | 2.66            |
| PBCS1    | 12   | 0.101 0.123 | 152 36 1 270 79 4        | 189 353   | 1.08     | 0.5835455     | 2  | 1.20   | 0.77          | 1.88          | 2.16   | 0.24          | 19.72           |
| PLCO     | 22   | 0.122 0.106 | 56 18 0 357 87 4         | 74 448    |          |               |    |        |               |               |        |               |                 |
| WHI      | 21   | 0.107 0.110 | 236 55 4 1378 341 21     | 295 1740  | 0.19     | 0.911097      | 2  | 1.06   | 0.77          | 1.47          | 0.91   | 0.31          | 2.71            |
| STAGE3   | 16   | 0.108 0.106 | 417 101 6 1275 319 11    | 524 1605  | 0.81     | 0.6664668     | 2  | 1.02   | 0.79          | 1.32          | 0.64   | 0.23          | 1.77            |
| NHS2     | 6    | 0.137 0.099 | 65 15 4 280 56 6         | 84 342    | 2.63     | 0.2684074     | 2  | 0.92   | 0.49          | 1.75          | 0.35   | 0.09          | 1.31            |
| PBCS2    | 23   | 0.105 0.107 | 273 68 2 565 143 5       | 343 713   | 0.04     | 0.9814424     | 2  | 0.99   | 0.72          | 1.38          | 1.17   | 0.22          | 6.14            |
| WHS      | 24   | 0.093 0.109 | 79 18 0 430 120 0        | 97 550    |          |               |    |        |               |               |        |               |                 |
| PBCS 1+2 | 18   | 0.103 0.113 | 425 104 3 833 222 9      | 532 1064  | 0.57     | 0.7535026     | 2  | 1.07   | 0.83          | 1.40          | 1.45   | 0.39          | 5.41            |

Locus Alleles Chr Location Neighborhood  
rs37936 A|G 7q21.11 79806994

| SUBSET   | Rank | MAF         | Geno Counts               | Subjects  | score X2 | score p-value | df | het OR | het OR 95% CI | het OR 95% CI | hom OR | hom OR 95% CI | hom OR 95% CI_u |
|----------|------|-------------|---------------------------|-----------|----------|---------------|----|--------|---------------|---------------|--------|---------------|-----------------|
| STAGE1-3 | 15   | 0.370 0.367 | 513 560 186 2015 2294 686 | 1259 4995 | 1.62     | 0.4442174     | 2  | 1.04   | 0.91          | 1.19          | 0.92   | 0.76          | 1.11            |
| NHS      | 12   | 0.369 0.362 | 77 68 31 333 343 115      | 176 791   | 1.62     | 0.4453885     | 2  | 1.16   | 0.80          | 1.66          | 0.86   | 0.53          | 1.38            |
| STAGE1-2 | 15   | 0.376 0.362 | 227 246 88 1268 1397 418  | 561 3083  | 1.51     | 0.4706443     | 2  | 1.01   | 0.82          | 1.22          | 0.86   | 0.65          | 1.13            |
| STAGE2   | 16   | 0.379 0.362 | 150 178 57 935 1054 303   | 385 2292  | 0.78     | 0.6764134     | 2  | 0.95   | 0.75          | 1.20          | 0.86   | 0.62          | 1.20            |
| PLCO     | 13   | 0.396 0.372 | 26 35 11 181 186 69       | 72 436    | 1.00     | 0.6050488     | 2  | 0.75   | 0.43          | 1.31          | 0.87   | 0.40          | 1.88            |
| WHI      | 11   | 0.387 0.362 | 111 131 46 680 800 212    | 288 1692  | 2.33     | 0.3119992     | 2  | 1.00   | 0.76          | 1.32          | 0.76   | 0.52          | 1.12            |
| STAGE3   | 10   | 0.382 0.374 | 203 238 80 618 750 218    | 521 1586  | 1.91     | 0.3843447     | 2  | 1.04   | 0.83          | 1.29          | 0.84   | 0.61          | 1.14            |
| NHS2     | 9    | 0.419 0.404 | 32 36 18 122 166 56       | 86 344    | 1.73     | 0.4202593     | 2  | 1.17   | 0.69          | 2.00          | 0.76   | 0.39          | 1.48            |
| PBCS2    | 21   | 0.362 0.360 | 134 163 41 283 324 88     | 338 695   | 0.16     | 0.921061      | 2  | 0.95   | 0.72          | 1.26          | 1.02   | 0.67          | 1.57            |
| WHS      | 5    | 0.418 0.373 | 37 39 21 213 260 74       | 97 547    | 4.38     | 0.1118296     | 2  | 1.24   | 0.76          | 2.05          | 0.65   | 0.35          | 1.21            |
| PBCS 1+2 | 14   | 0.347 0.366 | 217 239 59 412 471 138    | 515 1021  | 1.25     | 0.5346422     | 2  | 1.03   | 0.82          | 1.30          | 1.22   | 0.86          | 1.73            |

Locus Alleles Chr Location Neighborhood  
rs17570439 T|C 1p34.2 40096797 TRIT1

| SUBSET   | Rank | MAF         | Geno Counts              | Subjects  | score X2 | score p-value | df | het OR | het OR 95% CI | het OR 95% CI | hom OR | hom OR 95% CI | hom OR 95% CI_u |
|----------|------|-------------|--------------------------|-----------|----------|---------------|----|--------|---------------|---------------|--------|---------------|-----------------|
| STAGE1-3 | 16   | 0.231 0.224 | 759 465 65 3076 1762 263 | 1289 5101 | 1.55     | 0.4605699     | 2  | 0.92   | 0.80          | 1.05          | 0.98   | 0.73          | 1.31            |

|          |    |             |                          |          |      |           |   |      |      |      |      |      |      |
|----------|----|-------------|--------------------------|----------|------|-----------|---|------|------|------|------|------|------|
| NHS      | 17 | 0.238 0.245 | 107 65 11 457 304 46     | 183 807  | 0.45 | 0.7986237 | 2 | 1.11 | 0.79 | 1.57 | 0.94 | 0.47 | 1.89 |
| STAGE1-2 | 13 | 0.233 0.229 | 446 283 37 2104 1217 196 | 766 3517 | 1.57 | 0.4568233 | 2 | 0.91 | 0.77 | 1.08 | 1.09 | 0.75 | 1.59 |
| STAGE2   | 5  | 0.232 0.224 | 339 218 26 1647 913 150  | 583 2710 | 3.30 | 0.1925079 | 2 | 0.86 | 0.71 | 1.04 | 1.16 | 0.75 | 1.81 |
| PBCS1    | 2  | 0.214 0.215 | 113 71 5 223 108 22      | 189 353  | 5.62 | 0.06009   | 2 | 0.78 | 0.54 | 1.15 | 2.47 | 0.90 | 6.75 |
| PLCO     | 10 | 0.243 0.238 | 40 32 2 259 165 24       | 74 448   | 1.57 | 0.4559126 | 2 | 0.80 | 0.48 | 1.35 | 1.83 | 0.41 | 8.22 |
| WHI      | 19 | 0.238 0.225 | 171 106 17 1053 594 95   | 294 1742 | 0.36 | 0.836086  | 2 | 0.93 | 0.72 | 1.22 | 0.89 | 0.52 | 1.54 |
| STAGE3   | 13 | 0.228 0.214 | 313 182 28 972 545 67    | 523 1584 | 1.16 | 0.5606167 | 2 | 0.92 | 0.74 | 1.15 | 0.80 | 0.50 | 1.29 |
| NHS2     | 19 | 0.235 0.229 | 51 28 6 194 119 16       | 85 329   | 0.84 | 0.65661   | 2 | 1.08 | 0.64 | 1.81 | 0.67 | 0.25 | 1.81 |
| PBCS2    | 18 | 0.215 0.210 | 211 115 16 448 228 35    | 342 711  | 0.28 | 0.8712455 | 2 | 0.94 | 0.71 | 1.24 | 1.06 | 0.57 | 1.98 |
| WHS      | 7  | 0.266 0.211 | 51 39 6 330 198 16       | 96 544   | 3.43 | 0.1803775 | 2 | 0.75 | 0.47 | 1.20 | 0.44 | 0.16 | 1.21 |
| PBCS 1+2 | 5  | 0.215 0.211 | 324 186 21 671 336 57    | 531 1064 | 2.92 | 0.2318801 | 2 | 0.88 | 0.71 | 1.11 | 1.36 | 0.81 | 2.29 |

Locus Alleles Chr Location Neighborhood  
rs11077820 T|C 17q25.1 71966263 UBE2O,AANAT

| SUBSET   | Rank | MAF         | Geno Counts               | Subjects  | score X2 | score p-value | df | het OR | het OR 95% CI | het OR 95% CI | hom OR | hom OR 95% CI | hom OR 95% CI_u |
|----------|------|-------------|---------------------------|-----------|----------|---------------|----|--------|---------------|---------------|--------|---------------|-----------------|
| STAGE1-3 | 17   | 0.360 0.367 | 533 588 171 2093 2255 738 | 1292 5086 | 1.40     | 0.4960595     | 2  | 0.98   | 0.86          | 1.12          | 1.10   | 0.90          | 1.34            |
| NHS      | 19   | 0.374 0.374 | 73 83 27 329 353 125      | 183 807   | 0.21     | 0.8988117     | 2  | 0.92   | 0.65          | 1.31          | 0.99   | 0.61          | 1.62            |
| STAGE1-2 | 10   | 0.362 0.368 | 311 356 100 1447 1549 517 | 767 3513  | 2.22     | 0.3303224     | 2  | 0.91   | 0.77          | 1.09          | 1.08   | 0.84          | 1.39            |
| STAGE2   | 9    | 0.359 0.366 | 238 273 73 1118 1196 392  | 584 2706  | 2.23     | 0.3278788     | 2  | 0.91   | 0.75          | 1.11          | 1.12   | 0.83          | 1.50            |
| PBCS1    | 8    | 0.381 0.334 | 74 86 29 160 150 43       | 189 353   | 2.26     | 0.3233659     | 2  | 0.80   | 0.54          | 1.19          | 0.68   | 0.39          | 1.19            |
| PLCO     | 20   | 0.358 0.354 | 30 35 9 188 200 58        | 74 446    | 0.30     | 0.8622939     | 2  | 0.87   | 0.51          | 1.48          | 0.97   | 0.43          | 2.21            |
| WHI      | 4    | 0.342 0.378 | 124 140 31 694 776 270    | 295 1740  | 4.91     | 0.085957      | 2  | 0.99   | 0.76          | 1.29          | 1.55   | 1.02          | 2.37            |
| STAGE3   | 18   | 0.356 0.365 | 222 232 71 646 707 221    | 525 1574  | 0.78     | 0.6776061     | 2  | 1.08   | 0.87          | 1.35          | 1.12   | 0.82          | 1.54            |
| NHS2     | 5    | 0.341 0.373 | 41 30 14 133 153 48       | 85 334    | 2.63     | 0.2682117     | 2  | 1.54   | 0.91          | 2.62          | 1.11   | 0.55          | 2.22            |
| PBCS2    | 15   | 0.366 0.382 | 141 153 49 269 335 102    | 343 706   | 0.79     | 0.6724759     | 2  | 1.14   | 0.86          | 1.51          | 1.09   | 0.73          | 1.63            |
| WHS      | 9    | 0.335 0.338 | 40 49 8 244 219 71        | 97 534    | 3.04     | 0.2190294     | 2  | 0.75   | 0.47          | 1.20          | 1.41   | 0.63          | 3.19            |
| PBCS 1+2 | 20   | 0.371 0.366 | 215 239 78 429 484 145    | 532 1058  | 0.32     | 0.8528723     | 2  | 1.02   | 0.81          | 1.28          | 0.93   | 0.67          | 1.28            |

Locus Alleles Chr Location Neighborhood  
rs1274466 T|C 10p11.21 34510210 PARD3

| SUBSET   | Rank | MAF         | Geno Counts               | Subjects  | score X2 | score p-value | df | het OR | het OR 95% CI | het OR 95% CI | hom OR | hom OR 95% CI | hom OR 95% CI_u |
|----------|------|-------------|---------------------------|-----------|----------|---------------|----|--------|---------------|---------------|--------|---------------|-----------------|
| STAGE1-3 | 18   | 0.437 0.434 | 399 650 238 1648 2482 973 | 1287 5103 | 1.24     | 0.5387165     | 2  | 0.94   | 0.81          | 1.08          | 1.01   | 0.84          | 1.22            |
| NHS      | 9    | 0.432 0.436 | 55 98 30 261 388 158      | 183 807   | 1.80     | 0.4065291     | 2  | 0.84   | 0.58          | 1.21          | 1.10   | 0.67          | 1.79            |
| STAGE1-2 | 6    | 0.428 0.429 | 239 399 129 1164 1687 665 | 767 3516  | 3.90     | 0.1420752     | 2  | 0.89   | 0.74          | 1.06          | 1.09   | 0.86          | 1.38            |
| STAGE2   | 8    | 0.427 0.427 | 184 301 99 903 1299 507   | 584 2709  | 2.30     | 0.3170174     | 2  | 0.90   | 0.74          | 1.11          | 1.09   | 0.83          | 1.43            |
| PBCS1    | 14   | 0.439 0.457 | 57 98 34 104 174 74       | 189 352   | 1.01     | 0.6035443     | 2  | 0.99   | 0.65          | 1.49          | 1.25   | 0.74          | 2.13            |
| PLCO     | 9    | 0.453 0.391 | 22 37 15 167 212 69       | 74 448    | 2.07     | 0.3554938     | 2  | 0.73   | 0.41          | 1.29          | 0.60   | 0.29          | 1.26            |
| WHI      | 12   | 0.408 0.428 | 99 151 45 579 835 328     | 295 1742  | 2.30     | 0.3163034     | 2  | 0.95   | 0.72          | 1.25          | 1.25   | 0.86          | 1.83            |
| STAGE3   | 20   | 0.450 0.445 | 161 251 109 484 795 309   | 521 1588  | 0.62     | 0.7316383     | 2  | 1.02   | 0.81          | 1.29          | 0.92   | 0.69          | 1.23            |
| NHS2     | 3    | 0.506 0.432 | 19 46 20 106 166 61       | 85 333    | 3.64     | 0.1619316     | 2  | 0.61   | 0.33          | 1.10          | 0.54   | 0.26          | 1.09            |
| PBCS2    | 9    | 0.432 0.451 | 115 156 69 211 357 141    | 340 709   | 2.11     | 0.3475182     | 2  | 1.24   | 0.92          | 1.67          | 1.09   | 0.75          | 1.58            |
| WHS      | 21   | 0.464 0.445 | 27 49 20 167 272 107      | 96 546    | 0.23     | 0.8926342     | 2  | 0.89   | 0.53          | 1.49          | 0.89   | 0.47          | 1.69            |
| PBCS 1+2 | 13   | 0.436 0.452 | 171 254 103 315 531 214   | 528 1060  | 1.29     | 0.5254034     | 2  | 1.14   | 0.90          | 1.45          | 1.14   | 0.84          | 1.54            |

Locus Alleles Chr Location Neighborhood  
rs3134615 G|T 1p34.2 40134653 TRIT1,MYCL1

| SUBSET   | Rank | MAF         | Geno Counts              | Subjects  | score X2 | score p-value | df | het OR | het OR 95% CI | het OR 95% CI | hom OR | hom OR 95% CI | hom OR 95% CI_u |
|----------|------|-------------|--------------------------|-----------|----------|---------------|----|--------|---------------|---------------|--------|---------------|-----------------|
| STAGE1-3 | 19   | 0.250 0.243 | 722 489 77 2906 1906 288 | 1288 5100 | 0.98     | 0.6122449     | 2  | 0.95   | 0.83          | 1.08          | 0.90   | 0.69          | 1.19            |
| NHS      | 16   | 0.260 0.262 | 101 69 13 433 325 49     | 183 807   | 0.76     | 0.6849548     | 2  | 1.11   | 0.79          | 1.57          | 0.86   | 0.44          | 1.65            |
| STAGE1-2 | 20   | 0.256 0.248 | 420 302 45 1984 1323 210 | 767 3517  | 0.73     | 0.6936088     | 2  | 0.93   | 0.79          | 1.10          | 0.96   | 0.68          | 1.36            |
| STAGE2   | 11   | 0.254 0.244 | 319 233 32 1551 998 161  | 584 2710  | 1.84     | 0.398794      | 2  | 0.88   | 0.73          | 1.07          | 1.01   | 0.67          | 1.52            |
| PBCS1    | 4    | 0.235 0.231 | 106 77 6 213 117 23      | 189 353   | 5.05     | 0.0800777     | 2  | 0.78   | 0.54          | 1.13          | 2.10   | 0.82          | 5.35            |
| PLCO     | 15   | 0.264 0.253 | 38 33 3 247 175 26       | 74 448    | 0.84     | 0.6559725     | 2  | 0.82   | 0.49          | 1.38          | 1.27   | 0.36          | 4.52            |
| WHI      | 17   | 0.264 0.247 | 160 114 21 985 654 103   | 295 1742  | 0.77     | 0.6798799     | 2  | 0.96   | 0.74          | 1.25          | 0.80   | 0.49          | 1.32            |

|          |    |             |                       |          |      |           |   |      |      |      |      |      |      |
|----------|----|-------------|-----------------------|----------|------|-----------|---|------|------|------|------|------|------|
| STAGE3   | 19 | 0.241 0.234 | 302 188 32 922 585 79 | 522 1586 | 0.76 | 0.6835199 | 2 | 0.97 | 0.79 | 1.21 | 0.82 | 0.53 | 1.28 |
| NHS2     | 7  | 0.229 0.241 | 52 24 7 190 124 18    | 83 332   | 2.60 | 0.2730967 | 2 | 1.38 | 0.80 | 2.36 | 0.67 | 0.26 | 1.69 |
| PBCS2    | 17 | 0.230 0.225 | 202 124 17 427 240 39 | 343 706  | 0.61 | 0.7354014 | 2 | 0.92 | 0.70 | 1.21 | 1.13 | 0.62 | 2.07 |
| WHS      | 8  | 0.292 0.242 | 48 40 8 305 221 22    | 96 548   | 3.15 | 0.2066171 | 2 | 0.83 | 0.52 | 1.31 | 0.46 | 0.19 | 1.13 |
| PBCS 1+2 | 4  | 0.232 0.226 | 308 200 23 640 355 61 | 531 1056 | 3.40 | 0.1831144 | 2 | 0.87 | 0.70 | 1.09 | 1.34 | 0.81 | 2.22 |

Locus Alleles Chr Location Neighborhood  
rs2303659 G|A 11q24.3 129326474 PRDM10

| SUBSET   | Rank | MAF         | Geno Counts          | Subjects  | score X2 | score p-value | df | het OR | het OR 95% CI | het OR 95% CI | hom OR | hom OR 95% CI | hom OR 95% CI_u |
|----------|------|-------------|----------------------|-----------|----------|---------------|----|--------|---------------|---------------|--------|---------------|-----------------|
| STAGE1-3 | 20   | 0.024 0.026 | 1229 59 2 4833 251 9 | 1290 5093 | 0.47     | 0.7916263     | 2  | 1.11   | 0.82          | 1.49          | 0.98   | 0.21          | 4.66            |
| NHS      | 22   | 0.022 0.026 | 175 8 0 765 42 0     | 183 807   |          |               |    |        |               |               |        |               |                 |
| STAGE1-2 | 23   | 0.022 0.025 | 733 34 0 3341 174 2  | 767 3517  |          |               |    |        |               |               |        |               |                 |
| STAGE2   | 23   | 0.022 0.025 | 558 26 0 2576 132 2  | 584 2710  |          |               |    |        |               |               |        |               |                 |
| PBCS1    | 22   | 0.021 0.024 | 181 8 0 336 17 0     | 189 353   |          |               |    |        |               |               |        |               |                 |
| PLCO     | 24   | 0.020 0.026 | 71 3 0 425 23 0      | 74 448    |          |               |    |        |               |               |        |               |                 |
| WHI      | 24   | 0.025 0.025 | 280 15 0 1655 86 1   | 295 1742  |          |               |    |        |               |               |        |               |                 |
| STAGE3   | 24   | 0.028 0.029 | 496 25 2 1493 77 7   | 523 1577  | 0.24     | 0.8872308     | 2  | 1.10   | 0.69          | 1.77          | 0.80   | 0.16          | 4.05            |
| NHS2     | 24   | 0.000 0.030 | 84 0 0 321 14 3      | 84 338    |          |               |    |        |               |               |        |               |                 |
| PBCS2    | 24   | 0.033 0.028 | 322 21 1 669 40 0    | 344 709   |          |               |    |        |               |               |        |               |                 |
| WHS      | 19   | 0.032 0.029 | 90 4 1 503 23 4      | 95 530    | 0.38     | 0.8265927     | 2  | 0.85   | 0.28          | 2.53          | 0.54   | 0.06          | 5.05            |
| PBCS 1+2 | 24   | 0.029 0.027 | 503 29 1 1004 57 0   | 533 1061  |          |               |    |        |               |               |        |               |                 |

Locus Alleles Chr Location Neighborhood  
rs998592 G|A 16p13.13 11107179 CLEC16A

| SUBSET   | Rank | MAF         | Geno Counts               | Subjects  | score X2 | score p-value | df | het OR | het OR 95% CI | het OR 95% CI | hom OR | hom OR 95% CI | hom OR 95% CI_u |
|----------|------|-------------|---------------------------|-----------|----------|---------------|----|--------|---------------|---------------|--------|---------------|-----------------|
| STAGE1-3 | 21   | 0.404 0.417 | 446 647 199 1696 2557 852 | 1292 5105 | 0.45     | 0.7998214     | 2  | 0.99   | 0.86          | 1.14          | 1.05   | 0.87          | 1.27            |
| NHS      | 18   | 0.434 0.429 | 54 99 30 253 415 139      | 183 807   | 0.44     | 0.8031299     | 2  | 0.89   | 0.62          | 1.29          | 0.99   | 0.61          | 1.63            |
| STAGE1-2 | 18   | 0.403 0.424 | 264 388 115 1133 1787 597 | 767 3517  | 0.98     | 0.6132779     | 2  | 1.03   | 0.86          | 1.23          | 1.13   | 0.88          | 1.45            |
| STAGE2   | 14   | 0.393 0.422 | 210 289 85 880 1372 458   | 584 2710  | 1.32     | 0.5174464     | 2  | 1.07   | 0.87          | 1.31          | 1.18   | 0.89          | 1.56            |
| PBCS1    | 19   | 0.368 0.368 | 74 91 24 141 164 48       | 189 353   | 0.13     | 0.936943      | 2  | 0.95   | 0.64          | 1.39          | 1.03   | 0.58          | 1.83            |
| PLCO     | 17   | 0.426 0.393 | 25 35 14 162 220 66       | 74 448    | 0.70     | 0.7031902     | 2  | 1.00   | 0.56          | 1.76          | 0.75   | 0.36          | 1.56            |
| WHI      | 7    | 0.403 0.444 | 100 152 43 517 903 322    | 295 1742  | 3.44     | 0.1789584     | 2  | 1.15   | 0.87          | 1.51          | 1.44   | 0.98          | 2.11            |
| STAGE3   | 23   | 0.407 0.403 | 182 260 84 563 771 255    | 526 1589  | 0.34     | 0.8436868     | 2  | 0.94   | 0.75          | 1.17          | 0.95   | 0.70          | 1.29            |
| NHS2     | 10   | 0.482 0.425 | 22 43 19 115 159 64       | 84 338    | 1.70     | 0.4281903     | 2  | 0.77   | 0.43          | 1.37          | 0.64   | 0.32          | 1.28            |
| PBCS2    | 16   | 0.397 0.386 | 122 171 51 266 333 105    | 344 704   | 0.62     | 0.7331903     | 2  | 0.90   | 0.67          | 1.19          | 0.98   | 0.65          | 1.46            |
| WHS      | 17   | 0.378 0.412 | 38 46 14 182 279 86       | 98 547    | 0.51     | 0.7735556     | 2  | 1.16   | 0.71          | 1.88          | 1.24   | 0.63          | 2.45            |
| PBCS 1+2 | 17   | 0.386 0.380 | 196 261 75 407 496 153    | 532 1056  | 0.62     | 0.7352265     | 2  | 0.91   | 0.73          | 1.15          | 0.98   | 0.70          | 1.36            |

Locus Alleles Chr Location Neighborhood  
rs12622050 G|A 2q11.2 100945886 NPAS2

| SUBSET   | Rank | MAF         | Geno Counts              | Subjects  | score X2 | score p-value | df | het OR | het OR 95% CI | het OR 95% CI | hom OR | hom OR 95% CI | hom OR 95% CI_u |
|----------|------|-------------|--------------------------|-----------|----------|---------------|----|--------|---------------|---------------|--------|---------------|-----------------|
| STAGE1-3 | 22   | 0.225 0.209 | 779 439 70 3197 1647 236 | 1288 5080 | 0.44     | 0.8031439     | 2  | 0.97   | 0.85          | 1.11          | 0.93   | 0.70          | 1.24            |
| NHS      | 10   | 0.191 0.189 | 122 52 9 529 251 27      | 183 807   | 1.76     | 0.4158093     | 2  | 1.14   | 0.80          | 1.64          | 0.67   | 0.31          | 1.47            |
| STAGE1-2 | 21   | 0.202 0.200 | 492 240 35 2262 1101 152 | 767 3515  | 0.12     | 0.9439238     | 2  | 1.03   | 0.86          | 1.23          | 1.03   | 0.70          | 1.52            |
| STAGE2   | 20   | 0.205 0.203 | 370 188 26 1733 850 125  | 584 2708  | 0.40     | 0.8171727     | 2  | 1.00   | 0.82          | 1.22          | 1.15   | 0.74          | 1.81            |
| PBCS1    | 10   | 0.222 0.249 | 114 66 9 204 121 27      | 189 352   | 1.78     | 0.4104042     | 2  | 1.02   | 0.69          | 1.50          | 1.71   | 0.77          | 3.78            |
| PLCO     | 21   | 0.203 0.195 | 47 24 3 288 145 15       | 74 448    | 0.06     | 0.9684832     | 2  | 0.98   | 0.57          | 1.69          | 0.85   | 0.23          | 3.08            |
| WHI      | 20   | 0.198 0.194 | 192 89 14 1138 530 73    | 295 1741  | 0.20     | 0.9029715     | 2  | 1.01   | 0.77          | 1.32          | 0.88   | 0.48          | 1.59            |
| STAGE3   | 9    | 0.258 0.228 | 287 199 35 936 547 83    | 521 1566  | 2.09     | 0.3524023     | 2  | 0.88   | 0.71          | 1.09          | 0.79   | 0.52          | 1.22            |
| NHS2     | 21   | 0.204 0.216 | 51 27 3 202 112 15       | 81 329    | 0.08     | 0.9613146     | 2  | 1.02   | 0.60          | 1.73          | 1.20   | 0.33          | 4.36            |
| PBCS2    | 6    | 0.278 0.245 | 177 141 25 402 254 45    | 343 701   | 2.73     | 0.2547474     | 2  | 0.80   | 0.61          | 1.05          | 0.82   | 0.48          | 1.39            |
| WHS      | 14   | 0.232 0.212 | 59 31 7 332 181 23       | 97 536    | 1.14     | 0.5665073     | 2  | 0.99   | 0.61          | 1.61          | 0.61   | 0.25          | 1.53            |
| PBCS 1+2 | 11   | 0.258 0.247 | 291 207 34 605 374 73    | 532 1052  | 1.75     | 0.4158393     | 2  | 0.87   | 0.70          | 1.09          | 1.05   | 0.68          | 1.62            |

| Locus    | Alleles | Chr         | Location                 | Neighborhood   |          |               |    |        |               |               |        |               |                 |  |
|----------|---------|-------------|--------------------------|----------------|----------|---------------|----|--------|---------------|---------------|--------|---------------|-----------------|--|
| rs724244 | C T     | 3p24.1      |                          | 27217157 NEK10 |          |               |    |        |               |               |        |               |                 |  |
| SUBSET   | Rank    | MAF         | Geno Counts              | Subjects       | score X2 | score p-value | df | het OR | het OR 95% CI | het OR 95% CI | hom OR | hom OR 95% CI | hom OR 95% CI_u |  |
| STAGE1-3 | 23      | 0.267 0.273 | 597 424 83 2281 1695 328 | 1104 4304      | 0.10     | 0.9508505     | 2  | 1.02   | 0.88          | 1.18          | 1.03   | 0.79          | 1.35            |  |
| STAGE1-2 | 22      | 0.276 0.275 | 308 228 47 1429 1071 209 | 583 2709       | 0.05     | 0.9760107     | 2  | 0.98   | 0.81          | 1.19          | 0.98   | 0.69          | 1.39            |  |
| STAGE2   | 22      | 0.276 0.275 | 308 228 47 1429 1071 209 | 583 2709       | 0.05     | 0.9761391     | 2  | 0.98   | 0.81          | 1.19          | 0.98   | 0.69          | 1.39            |  |
| PBCS1    | 11      | 0.250 0.265 | 106 70 12 198 123 32     | 188 353        | 1.70     | 0.4284314     | 2  | 0.93   | 0.64          | 1.37          | 1.52   | 0.74          | 3.12            |  |
| PLCO     | 4       | 0.257 0.271 | 44 22 8 235 182 30       | 74 447         | 4.67     | 0.0969753     | 2  | 1.56   | 0.90          | 2.73          | 0.62   | 0.25          | 1.50            |  |
| WHI      | 18      | 0.295 0.280 | 145 126 24 901 708 133   | 295 1742       | 0.56     | 0.7557225     | 2  | 0.91   | 0.70          | 1.18          | 0.91   | 0.57          | 1.46            |  |
| STAGE3   | 22      | 0.258 0.270 | 290 196 37 852 624 119   | 523 1595       | 0.42     | 0.808809      | 2  | 1.07   | 0.86          | 1.32          | 1.08   | 0.72          | 1.62            |  |
| NHS2     | 15      | 0.286 0.281 | 45 30 9 176 134 28       | 84 338         | 0.93     | 0.6289149     | 2  | 1.11   | 0.66          | 1.87          | 0.73   | 0.32          | 1.68            |  |
| PBCS2    | 11      | 0.244 0.265 | 198 121 23 381 280 48    | 342 709        | 1.72     | 0.4233763     | 2  | 1.20   | 0.91          | 1.58          | 1.13   | 0.66          | 1.92            |  |
| WHS      | 10      | 0.284 0.270 | 47 45 5 295 210 43       | 97 548         | 2.85     | 0.2409569     | 2  | 0.71   | 0.45          | 1.12          | 1.26   | 0.47          | 3.38            |  |
| PBCS 1+2 | 9       | 0.245 0.265 | 303 191 34 579 403 80    | 528 1062       | 1.81     | 0.404269      | 2  | 1.10   | 0.88          | 1.38          | 1.30   | 0.84          | 1.99            |  |

| Locus     | Alleles | Chr         | Location                  | Neighborhood |          |               |    |        |               |               |        |               |                 |  |
|-----------|---------|-------------|---------------------------|--------------|----------|---------------|----|--------|---------------|---------------|--------|---------------|-----------------|--|
| rs4666451 | G A     | 2p24.1      |                           | 19150424     |          |               |    |        |               |               |        |               |                 |  |
| SUBSET    | Rank    | MAF         | Geno Counts               | Subjects     | score X2 | score p-value | df | het OR | het OR 95% CI | het OR 95% CI | hom OR | hom OR 95% CI | hom OR 95% CI_u |  |
| STAGE1-3  | 24      | 0.387 0.385 | 415 528 164 1621 2044 634 | 1107 4299    | 0.01     | 0.994448      | 2  | 1.00   | 0.86          | 1.16          | 1.01   | 0.82          | 1.25            |  |
| STAGE1-2  | 12      | 0.363 0.383 | 236 272 76 1028 1286 396  | 584 2710     | 1.64     | 0.4408551     | 2  | 1.09   | 0.89          | 1.33          | 1.19   | 0.89          | 1.60            |  |
| STAGE2    | 13      | 0.363 0.383 | 236 272 76 1028 1286 396  | 584 2710     | 1.63     | 0.4418241     | 2  | 1.09   | 0.89          | 1.33          | 1.19   | 0.89          | 1.60            |  |
| PBCS1     | 6       | 0.384 0.375 | 67 99 23 140 161 52       | 189 353      | 2.65     | 0.2656403     | 2  | 0.78   | 0.53          | 1.15          | 1.15   | 0.65          | 2.06            |  |
| PLCO      | 6       | 0.338 0.394 | 30 38 6 170 203 75        | 74 448       | 3.70     | 0.1569132     | 2  | 0.87   | 0.51          | 1.49          | 2.11   | 0.83          | 5.33            |  |
| WHI       | 6       | 0.351 0.378 | 130 123 42 672 822 248    | 295 1742     | 3.90     | 0.142314      | 2  | 1.31   | 1.00          | 1.71          | 1.11   | 0.76          | 1.63            |  |
| STAGE3    | 11      | 0.413 0.388 | 179 257 88 593 760 238    | 524 1591     | 1.52     | 0.4665504     | 2  | 0.90   | 0.72          | 1.13          | 0.84   | 0.62          | 1.13            |  |
| NHS2      | 1       | 0.436 0.370 | 31 35 20 128 165 41       | 86 334       | 7.68     | 0.0215344     | 2  | 1.18   | 0.69          | 2.03          | 0.48   | 0.25          | 0.94            |  |
| PBCS2     | 3       | 0.411 0.398 | 111 181 50 263 330 118    | 342 711      | 3.86     | 0.1454901     | 2  | 0.78   | 0.58          | 1.04          | 1.02   | 0.68          | 1.53            |  |
| WHS       | 16      | 0.401 0.387 | 37 41 18 202 265 79       | 96 546       | 0.94     | 0.6253733     | 2  | 1.11   | 0.68          | 1.81          | 0.82   | 0.43          | 1.54            |  |
| PBCS 1+2  | 1       | 0.401 0.390 | 178 279 73 403 489 170    | 530 1062     | 6.54     | 0.0380003     | 2  | 0.77   | 0.61          | 0.97          | 1.05   | 0.76          | 1.46            |  |

**adj\_trend**

| Locus      | Alleles | Chr         | Location                  | Neighborhood        |          |               |    |        |               |               |        |               |                 |  |
|------------|---------|-------------|---------------------------|---------------------|----------|---------------|----|--------|---------------|---------------|--------|---------------|-----------------|--|
| rs11249433 | T C     | 1p11.2      |                           | 120982136 LOC647121 |          |               |    |        |               |               |        |               |                 |  |
| SUBSET     | Rank    | MAF         | Geno Counts               | Subjects            | score X2 | score p-value | df | het OR | het OR 95% CI | het OR 95% CI | hom OR | hom OR 95% CI | hom OR 95% CI_u |  |
| STAGE1-3   | 1       | 0.397 0.441 | 474 598 209 1590 2476 993 | 1281 5059           | 10.44    | 0.0012304     | 1  | 1.16   | 1.06          | 1.27          | 1.35   | 1.12          | 1.61            |  |
| NHS        | 5       | 0.412 0.448 | 65 84 33 238 411 155      | 182 804             | 1.26     | 0.2619051     | 1  | 1.14   | 0.90          | 1.45          | 1.31   | 0.82          | 2.10            |  |
| STAGE1-2   | 1       | 0.402 0.443 | 270 373 121 1070 1756 674 | 764 3500            | 6.54     | 0.0105664     | 1  | 1.16   | 1.04          | 1.31          | 1.35   | 1.07          | 1.71            |  |
| STAGE2     | 2       | 0.399 0.442 | 205 289 88 832 1345 519   | 582 2696            | 5.18     | 0.022797      | 1  | 1.17   | 1.02          | 1.33          | 1.36   | 1.04          | 1.78            |  |
| PBCS1      | 10      | 0.392 0.407 | 67 96 26 124 171 58       | 189 353             | 0.27     | 0.6001273     | 1  | 1.07   | 0.83          | 1.39          | 1.15   | 0.68          | 1.94            |  |
| PLCO       | 14      | 0.411 0.427 | 26 34 13 140 232 75       | 73 447              | 0.16     | 0.6900944     | 1  | 1.08   | 0.74          | 1.57          | 1.16   | 0.55          | 2.45            |  |
| WHI        | 1       | 0.396 0.455 | 105 145 44 514 857 359    | 294 1730            | 7.66     | 0.0056393     | 1  | 1.29   | 1.08          | 1.54          | 1.66   | 1.16          | 2.38            |  |
| STAGE3     | 3       | 0.388 0.436 | 204 225 88 520 720 319    | 517 1559            | 4.04     | 0.0445222     | 1  | 1.16   | 1.00          | 1.34          | 1.34   | 1.01          | 1.79            |  |
| NHS2       | 22      | 0.453 0.446 | 27 40 19 107 147 72       | 86 326              | 0.02     | 0.8762929     | 1  | 0.97   | 0.70          | 1.35          | 0.95   | 0.49          | 1.83            |  |
| PBCS2      | 5       | 0.372 0.410 | 137 149 51 246 324 121    | 337 691             | 2.24     | 0.1345332     | 1  | 1.15   | 0.96          | 1.39          | 1.33   | 0.91          | 1.94            |  |
| WHS        | 2       | 0.383 0.462 | 40 36 18 167 249 126      | 94 542              | 4.21     | 0.0402104     | 1  | 1.39   | 1.01          | 1.90          | 1.92   | 1.03          | 3.60            |  |
| PBCS 1+2   | 4       | 0.379 0.409 | 204 245 77 370 495 179    | 526 1044            | 2.19     | 0.1391221     | 1  | 1.12   | 0.96          | 1.31          | 1.26   | 0.93          | 1.71            |  |

| Locus     | Alleles | Chr         | Location                 | Neighborhood |          |               |    |        |               |               |        |               |                 |  |
|-----------|---------|-------------|--------------------------|--------------|----------|---------------|----|--------|---------------|---------------|--------|---------------|-----------------|--|
| rs7716600 | C A     | 5p12        |                          | 44910762     |          |               |    |        |               |               |        |               |                 |  |
| SUBSET    | Rank    | MAF         | Geno Counts              | Subjects     | score X2 | score p-value | df | het OR | het OR 95% CI | het OR 95% CI | hom OR | hom OR 95% CI | hom OR 95% CI_u |  |
| STAGE1-3  | 2       | 0.220 0.243 | 787 439 65 2950 1835 322 | 1291 5107    | 6.70     | 0.0096409     | 1  | 1.15   | 1.03          | 1.28          | 1.32   | 1.07          | 1.63            |  |
| NHS       | 12      | 0.246 0.253 | 108 60 15 451 303 53     | 183 807      | 0.09     | 0.7649906     | 1  | 1.04   | 0.80          | 1.35          | 1.08   | 0.64          | 1.83            |  |
| STAGE1-2  | 2       | 0.225 0.248 | 465 259 43 2015 1256 243 | 767 3514     | 5.93     | 0.014861      | 1  | 1.18   | 1.03          | 1.35          | 1.39   | 1.07          | 1.81            |  |

|          |    |             |                         |          |      |           |   |      |      |      |      |      |      |
|----------|----|-------------|-------------------------|----------|------|-----------|---|------|------|------|------|------|------|
| STAGE2   | 1  | 0.218 0.246 | 357 199 28 1564 953 190 | 584 2707 | 6.98 | 0.0082273 | 1 | 1.23 | 1.05 | 1.43 | 1.51 | 1.11 | 2.06 |
| PBCS1    | 20 | 0.272 0.272 | 99 77 13 186 139 26     | 189 351  | 0.00 | 0.9546377 | 1 | 0.99 | 0.74 | 1.32 | 0.98 | 0.55 | 1.75 |
| PLCO     | 2  | 0.169 0.232 | 52 19 3 261 166 21      | 74 448   | 3.68 | 0.0552172 | 1 | 1.58 | 0.99 | 2.52 | 2.49 | 0.97 | 6.36 |
| WHI      | 2  | 0.200 0.248 | 188 96 11 1010 600 131  | 295 1741 | 6.14 | 0.0132182 | 1 | 1.31 | 1.06 | 1.62 | 1.71 | 1.12 | 2.61 |
| STAGE3   | 11 | 0.214 0.231 | 322 180 22 936 581 78   | 524 1595 | 0.88 | 0.3485748 | 1 | 1.09 | 0.91 | 1.29 | 1.18 | 0.83 | 1.68 |
| NHS2     | 6  | 0.267 0.230 | 46 34 6 198 126 15      | 86 339   | 1.21 | 0.2715063 | 1 | 0.80 | 0.54 | 1.19 | 0.64 | 0.29 | 1.42 |
| PBCS2    | 3  | 0.195 0.233 | 219 111 11 417 254 38   | 341 709  | 3.42 | 0.0644695 | 1 | 1.24 | 0.99 | 1.56 | 1.54 | 0.97 | 2.44 |
| WHS      | 24 | 0.232 0.229 | 57 35 5 321 201 25      | 97 547   | 0.00 | 0.9679703 | 1 | 0.99 | 0.68 | 1.45 | 0.98 | 0.46 | 2.10 |
| PBCS 1+2 | 2  | 0.223 0.246 | 318 188 24 602 391 65   | 530 1058 | 2.50 | 0.1138829 | 1 | 1.15 | 0.97 | 1.38 | 1.33 | 0.93 | 1.90 |

Locus Alleles Chr Location Neighborhood  
rs2067980 A|G 5p12 45018074

| SUBSET   | Rank | MAF         | Geno Counts              | Subjects  | score X2 | score p-value | df | het OR | het OR 95% CI | het OR 95% CI | hom OR | hom OR 95% CI | hom OR 95% CI_u |
|----------|------|-------------|--------------------------|-----------|----------|---------------|----|--------|---------------|---------------|--------|---------------|-----------------|
| STAGE1-3 | 3    | 0.163 0.176 | 902 356 32 3497 1411 190 | 1290 5098 | 6.52     | 0.010673      | 1  | 1.17   | 1.04          | 1.31          | 1.36   | 1.07          | 1.72            |
| NHS      | 15   | 0.172 0.179 | 125 53 5 542 240 24      | 183 806   | 0.07     | 0.7931337     | 1  | 1.04   | 0.77          | 1.41          | 1.09   | 0.59          | 2.00            |
| STAGE1-2 | 4    | 0.170 0.175 | 530 213 24 2412 975 129  | 767 3516  | 2.67     | 0.1020637     | 1  | 1.13   | 0.98          | 1.31          | 1.28   | 0.95          | 1.73            |
| STAGE2   | 5    | 0.170 0.174 | 405 160 19 1870 735 105  | 584 2710  | 2.77     | 0.096002      | 1  | 1.16   | 0.97          | 1.37          | 1.34   | 0.95          | 1.88            |
| PBCS1    | 6    | 0.251 0.231 | 107 69 13 208 127 18     | 189 353   | 0.60     | 0.4386169     | 1  | 0.89   | 0.66          | 1.20          | 0.79   | 0.44          | 1.43            |
| PLCO     | 6    | 0.122 0.156 | 57 16 1 322 112 14       | 74 448    | 1.25     | 0.263967      | 1  | 1.35   | 0.80          | 2.27          | 1.81   | 0.64          | 5.18            |
| WHI      | 3    | 0.134 0.170 | 221 69 5 1216 460 66     | 295 1742  | 4.99     | 0.0255348     | 1  | 1.33   | 1.03          | 1.70          | 1.76   | 1.07          | 2.90            |
| STAGE3   | 4    | 0.152 0.177 | 372 143 8 1085 437 61    | 523 1583  | 3.94     | 0.0470144     | 1  | 1.22   | 1.00          | 1.48          | 1.48   | 1.00          | 2.19            |
| NHS2     | 17   | 0.149 0.161 | 59 25 0 240 79 14        | 84 333    | 0.10     | 0.7484156     | 1  | 1.08   | 0.68          | 1.72          | 1.16   | 0.46          | 2.95            |
| PBCS2    | 4    | 0.156 0.188 | 243 93 7 467 211 27      | 343 705   | 2.96     | 0.0851781     | 1  | 1.24   | 0.97          | 1.59          | 1.54   | 0.94          | 2.52            |
| WHS      | 7    | 0.141 0.172 | 70 25 1 378 147 20       | 96 545    | 1.95     | 0.1624582     | 1  | 1.37   | 0.88          | 2.14          | 1.88   | 0.77          | 4.60            |
| PBCS 1+2 | 10   | 0.190 0.202 | 350 162 20 675 337 45    | 532 1057  | 0.91     | 0.3394918     | 1  | 1.10   | 0.91          | 1.32          | 1.20   | 0.82          | 1.75            |

Locus Alleles Chr Location Neighborhood  
rs17740709 A|G 12q21.31 81947471 TMTC2

| SUBSET   | Rank | MAF         | Geno Counts              | Subjects  | score X2 | score p-value | df | het OR | het OR 95% CI | het OR 95% CI | hom OR | hom OR 95% CI | hom OR 95% CI_u |
|----------|------|-------------|--------------------------|-----------|----------|---------------|----|--------|---------------|---------------|--------|---------------|-----------------|
| STAGE1-3 | 4    | 0.210 0.220 | 811 412 65 3142 1658 292 | 1288 5092 | 3.99     | 0.0458952     | 1  | 1.11   | 1.00          | 1.24          | 1.24   | 1.00          | 1.54            |
| NHS      | 1    | 0.180 0.222 | 121 58 4 502 251 54      | 183 807   | 3.95     | 0.0468906     | 1  | 1.34   | 1.00          | 1.79          | 1.79   | 1.01          | 3.19            |
| STAGE1-2 | 10   | 0.213 0.217 | 481 246 40 2194 1121 202 | 767 3517  | 0.97     | 0.3246789     | 1  | 1.07   | 0.94          | 1.22          | 1.14   | 0.87          | 1.50            |
| STAGE2   | 23   | 0.223 0.215 | 360 188 36 1692 870 148  | 584 2710  | 0.00     | 0.9556468     | 1  | 1.00   | 0.86          | 1.17          | 1.01   | 0.74          | 1.37            |
| PBCS1    | 13   | 0.254 0.245 | 106 70 13 203 127 23     | 189 353   | 0.13     | 0.7216656     | 1  | 0.95   | 0.71          | 1.26          | 0.90   | 0.51          | 1.60            |
| PLCO     | 13   | 0.209 0.218 | 48 21 5 277 147 24       | 74 448    | 0.18     | 0.6750393     | 1  | 1.09   | 0.72          | 1.67          | 1.20   | 0.51          | 2.80            |
| WHI      | 20   | 0.212 0.210 | 187 91 17 1105 544 93    | 295 1742  | 0.01     | 0.9209128     | 1  | 0.99   | 0.80          | 1.22          | 0.98   | 0.65          | 1.49            |
| STAGE3   | 2    | 0.207 0.228 | 330 166 25 948 539 90    | 521 1577  | 4.07     | 0.0435428     | 1  | 1.20   | 1.01          | 1.42          | 1.43   | 1.01          | 2.02            |
| NHS2     | 15   | 0.204 0.212 | 53 23 5 207 109 16       | 81 332    | 0.17     | 0.6845016     | 1  | 1.09   | 0.72          | 1.67          | 1.19   | 0.51          | 2.78            |
| PBCS2    | 2    | 0.212 0.254 | 215 109 18 398 260 50    | 342 708   | 4.43     | 0.0352363     | 1  | 1.26   | 1.02          | 1.57          | 1.59   | 1.03          | 2.46            |
| WHS      | 22   | 0.194 0.203 | 62 34 2 343 170 24       | 98 537    | 0.04     | 0.8326969     | 1  | 1.04   | 0.70          | 1.55          | 1.09   | 0.49          | 2.40            |
| PBCS 1+2 | 3    | 0.227 0.251 | 321 179 31 601 385 73    | 531 1059  | 2.20     | 0.1376171     | 1  | 1.14   | 0.96          | 1.35          | 1.30   | 0.92          | 1.83            |

Locus Alleles Chr Location Neighborhood  
rs7936636 C|T 11p11.2 44397546

| SUBSET   | Rank | MAF         | Geno Counts              | Subjects  | score X2 | score p-value | df | het OR | het OR 95% CI | het OR 95% CI | hom OR | hom OR 95% CI | hom OR 95% CI_u |
|----------|------|-------------|--------------------------|-----------|----------|---------------|----|--------|---------------|---------------|--------|---------------|-----------------|
| STAGE1-3 | 5    | 0.234 0.250 | 759 457 74 2885 1879 337 | 1290 5101 | 3.47     | 0.0626066     | 1  | 1.10   | 0.99          | 1.22          | 1.22   | 0.99          | 1.50            |
| NHS      | 4    | 0.219 0.247 | 110 66 7 470 276 61      | 183 807   | 1.30     | 0.2550583     | 1  | 1.17   | 0.89          | 1.53          | 1.36   | 0.80          | 2.33            |
| STAGE1-2 | 5    | 0.226 0.247 | 465 258 44 2020 1258 238 | 767 3516  | 2.66     | 0.1026178     | 1  | 1.12   | 0.98          | 1.27          | 1.24   | 0.96          | 1.62            |
| STAGE2   | 8    | 0.228 0.247 | 355 192 37 1550 982 177  | 584 2709  | 1.46     | 0.2274033     | 1  | 1.10   | 0.94          | 1.28          | 1.21   | 0.89          | 1.63            |
| PBCS1    | 22   | 0.228 0.229 | 115 62 12 212 119 21     | 189 352   | 0.00     | 0.9971591     | 1  | 1.00   | 0.74          | 1.34          | 1.00   | 0.55          | 1.80            |
| PLCO     | 19   | 0.243 0.253 | 45 22 7 254 161 33       | 74 448    | 0.08     | 0.7806562     | 1  | 1.06   | 0.71          | 1.59          | 1.12   | 0.50          | 2.52            |
| WHI      | 6    | 0.219 0.249 | 181 99 15 983 649 110    | 295 1742  | 2.92     | 0.0873839     | 1  | 1.20   | 0.97          | 1.48          | 1.44   | 0.95          | 2.20            |
| STAGE3   | 13   | 0.248 0.258 | 294 199 30 865 621 98    | 523 1584  | 0.76     | 0.3823492     | 1  | 1.08   | 0.91          | 1.27          | 1.16   | 0.83          | 1.62            |
| NHS2     | 23   | 0.244 0.239 | 47 33 4 198 117 22       | 84 337    | 0.01     | 0.9244769     | 1  | 0.98   | 0.66          | 1.45          | 0.96   | 0.44          | 2.11            |



|          |    |             |                       |          |      |           |   |      |      |      |      |      |      |
|----------|----|-------------|-----------------------|----------|------|-----------|---|------|------|------|------|------|------|
| PBCS2    | 23 | 0.265 0.268 | 185 133 24 372 282 47 | 342 701  | 0.00 | 0.9757255 | 1 | 1.00 | 0.81 | 1.24 | 1.01 | 0.66 | 1.53 |
| WHS      | 3  | 0.191 0.256 | 62 33 2 295 222 29    | 97 546   | 3.78 | 0.0517773 | 1 | 1.49 | 0.99 | 2.22 | 2.21 | 0.99 | 4.94 |
| PBCS 1+2 | 21 | 0.251 0.256 | 300 195 36 584 401 69 | 531 1054 | 0.01 | 0.9028057 | 1 | 1.01 | 0.85 | 1.20 | 1.02 | 0.73 | 1.44 |

Locus Alleles Chr Location Neighborhood  
rs12608723 A|G 19q13.11 38508973

| SUBSET   | Rank | MAF         | Geno Counts             | Subjects  | score X2 | score p-value | df | het OR | het OR 95% CI | het OR 95% CI | hom OR | hom OR 95% CI | hom OR 95% CI_u |
|----------|------|-------------|-------------------------|-----------|----------|---------------|----|--------|---------------|---------------|--------|---------------|-----------------|
| STAGE1-3 | 6    | 0.132 0.121 | 984 274 33 3939 1089 75 | 1291 5103 | 2.98     | 0.0845276     | 1  | 0.89   | 0.78          | 1.02          | 0.79   | 0.61          | 1.03            |
| NHS      | 2    | 0.156 0.121 | 127 55 1 624 169 13     | 183 806   | 2.79     | 0.0947484     | 1  | 0.76   | 0.55          | 1.05          | 0.57   | 0.30          | 1.10            |
| STAGE1-2 | 3    | 0.143 0.122 | 569 176 22 2710 757 49  | 767 3516  | 5.90     | 0.0151048     | 1  | 0.82   | 0.69          | 0.96          | 0.67   | 0.48          | 0.93            |
| STAGE2   | 3    | 0.140 0.122 | 442 121 21 2086 588 36  | 584 2710  | 3.27     | 0.0704793     | 1  | 0.84   | 0.70          | 1.02          | 0.71   | 0.49          | 1.03            |
| PBCS1    | 2    | 0.135 0.110 | 142 43 4 278 72 3       | 189 353   | 1.57     | 0.2106954     | 1  | 0.78   | 0.53          | 1.15          | 0.61   | 0.28          | 1.32            |
| PLCO     | 3    | 0.162 0.116 | 57 10 7 348 96 4        | 74 448    | 2.56     | 0.1095974     | 1  | 0.68   | 0.42          | 1.09          | 0.46   | 0.18          | 1.20            |
| WHI      | 15   | 0.137 0.126 | 222 65 8 1330 386 26    | 295 1742  | 0.54     | 0.4634469     | 1  | 0.91   | 0.70          | 1.17          | 0.83   | 0.50          | 1.38            |
| STAGE3   | 22   | 0.115 0.122 | 415 99 11 1229 335 26   | 525 1590  | 0.14     | 0.7096065     | 1  | 1.04   | 0.84          | 1.30          | 1.09   | 0.70          | 1.69            |
| NHS2     | 12   | 0.138 0.118 | 67 16 4 261 69 5        | 87 335    | 0.35     | 0.5537299     | 1  | 0.86   | 0.53          | 1.40          | 0.75   | 0.28          | 1.96            |
| PBCS2    | 10   | 0.102 0.119 | 276 62 4 554 145 12     | 342 711   | 1.21     | 0.2704871     | 1  | 1.18   | 0.88          | 1.59          | 1.07   | 0.77          | 2.51            |
| WHS      | 21   | 0.141 0.128 | 72 21 3 414 121 9       | 96 544    | 0.08     | 0.7752159     | 1  | 0.94   | 0.60          | 1.47          | 0.88   | 0.36          | 2.15            |
| PBCS 1+2 | 22   | 0.113 0.115 | 418 104 8 832 214 15    | 530 1061  | 0.01     | 0.9194631     | 1  | 1.01   | 0.80          | 1.28          | 1.02   | 0.64          | 1.63            |

Locus Alleles Chr Location Neighborhood  
rs10941679 A|G 5p12 44742255

| SUBSET   | Rank | MAF         | Geno Counts            | Subjects | score X2 | score p-value | df | het OR | het OR 95% CI | het OR 95% CI | hom OR | hom OR 95% CI | hom OR 95% CI_u |
|----------|------|-------------|------------------------|----------|----------|---------------|----|--------|---------------|---------------|--------|---------------|-----------------|
| STAGE1-3 | 7    | 0.264 0.282 | 378 275 47 978 787 146 | 700 1911 | 2.63     | 0.1045345     | 1  | 1.13   | 0.98          | 1.30          | 1.27   | 0.95          | 1.69            |
| STAGE3   | 5    | 0.247 0.278 | 293 197 30 817 646 116 | 520 1579 | 3.72     | 0.0539222     | 1  | 1.18   | 1.00          | 1.39          | 1.39   | 0.99          | 1.94            |
| NHS2     | 16   | 0.268 0.285 | 46 28 8 173 133 29     | 82 335   | 0.14     | 0.7074004     | 1  | 1.08   | 0.74          | 1.57          | 1.16   | 0.54          | 2.48            |
| PBCS2    | 1    | 0.235 0.288 | 196 130 15 350 308 50  | 341 708  | 6.21     | 0.0127186     | 1  | 1.32   | 1.06          | 1.65          | 1.75   | 1.12          | 2.71            |
| WHS      | 20   | 0.273 0.260 | 51 39 7 294 205 37     | 97 536   | 0.10     | 0.7475645     | 1  | 0.94   | 0.66          | 1.34          | 0.89   | 0.44          | 1.80            |
| PBCS 1+2 | 1    | 0.261 0.293 | 281 208 32 511 449 80  | 521 1040 | 3.69     | 0.0546932     | 1  | 1.18   | 1.00          | 1.41          | 1.40   | 0.99          | 1.98            |

Locus Alleles Chr Location Neighborhood  
rs9491859 C|A 6q22.33 128106056 C6orf190

| SUBSET   | Rank | MAF         | Geno Counts               | Subjects  | score X2 | score p-value | df | het OR | het OR 95% CI | het OR 95% CI | hom OR | hom OR 95% CI | hom OR 95% CI_u |
|----------|------|-------------|---------------------------|-----------|----------|---------------|----|--------|---------------|---------------|--------|---------------|-----------------|
| STAGE1-3 | 8    | 0.357 0.377 | 525 602 158 2017 2314 764 | 1285 5095 | 2.05     | 0.1524097     | 1  | 1.07   | 0.98          | 1.17          | 1.14   | 0.95          | 1.37            |
| NHS      | 8    | 0.388 0.375 | 67 90 26 325 359 123      | 183 807   | 0.46     | 0.496414      | 1  | 0.92   | 0.73          | 1.16          | 0.85   | 0.54          | 1.35            |
| STAGE1-2 | 22   | 0.374 0.377 | 301 359 107 1401 1579 536 | 767 3516  | 0.00     | 0.966694      | 1  | 1.00   | 0.89          | 1.12          | 1.00   | 0.80          | 1.26            |
| STAGE2   | 19   | 0.369 0.378 | 234 269 81 1076 1220 413  | 584 2709  | 0.11     | 0.7391383     | 1  | 1.02   | 0.90          | 1.17          | 1.05   | 0.80          | 1.36            |
| PBCS1    | 14   | 0.354 0.364 | 83 78 28 147 154 51       | 189 352   | 0.12     | 0.7342193     | 1  | 1.05   | 0.81          | 1.35          | 1.09   | 0.65          | 1.83            |
| PLCO     | 20   | 0.378 0.376 | 29 34 11 170 219 59       | 74 448    | 0.06     | 0.8100503     | 1  | 0.96   | 0.66          | 1.39          | 0.91   | 0.43          | 1.92            |
| WHI      | 22   | 0.385 0.384 | 110 143 42 682 781 279    | 295 1742  | 0.01     | 0.9372913     | 1  | 1.01   | 0.84          | 1.20          | 1.01   | 0.71          | 1.45            |
| STAGE3   | 1    | 0.333 0.377 | 224 243 51 617 735 228    | 518 1580  | 4.86     | 0.0274846     | 1  | 1.19   | 1.02          | 1.38          | 1.41   | 1.04          | 1.91            |
| NHS2     | 7    | 0.335 0.371 | 35 39 8 139 147 52        | 82 338    | 0.76     | 0.3828114     | 1  | 1.17   | 0.82          | 1.67          | 1.37   | 0.67          | 2.80            |
| PBCS2    | 8    | 0.335 0.365 | 146 160 34 286 322 96     | 340 704   | 1.50     | 0.2206407     | 1  | 1.13   | 0.93          | 1.37          | 1.28   | 0.86          | 1.89            |
| WHS      | 1    | 0.323 0.396 | 43 44 9 192 266 80        | 96 538    | 5.62     | 0.01774       | 1  | 1.51   | 1.07          | 2.13          | 2.29   | 1.15          | 4.54            |
| PBCS 1+2 | 7    | 0.342 0.365 | 229 238 62 432 476 147    | 529 1055  | 1.57     | 0.2096501     | 1  | 1.10   | 0.95          | 1.29          | 1.22   | 0.89          | 1.66            |

Locus Alleles Chr Location Neighborhood  
rs4415084 C|T 5p12 44698272

| SUBSET   | Rank | MAF         | Geno Counts               | Subjects  | score X2 | score p-value | df | het OR | het OR 95% CI | het OR 95% CI | hom OR | hom OR 95% CI | hom OR 95% CI_u |
|----------|------|-------------|---------------------------|-----------|----------|---------------|----|--------|---------------|---------------|--------|---------------|-----------------|
| STAGE1-3 | 9    | 0.422 0.431 | 434 623 232 1673 2433 970 | 1289 5076 | 1.74     | 0.1874091     | 1  | 1.06   | 0.97          | 1.16          | 1.13   | 0.94          | 1.35            |
| NHS      | 10   | 0.448 0.437 | 57 87 38 240 421 139      | 182 800   | 0.27     | 0.6044438     | 1  | 0.94   | 0.74          | 1.19          | 0.88   | 0.55          | 1.42            |
| STAGE1-2 | 9    | 0.422 0.429 | 264 358 144 1154 1698 657 | 766 3509  | 1.39     | 0.239165      | 1  | 1.07   | 0.96          | 1.20          | 1.15   | 0.91          | 1.44            |
| STAGE2   | 6    | 0.414 0.427 | 207 271 106 914 1277 518  | 584 2709  | 2.50     | 0.1136516     | 1  | 1.11   | 0.98          | 1.27          | 1.23   | 0.95          | 1.60            |

|          |    |             |                         |          |      |           |   |      |      |      |      |      |      |
|----------|----|-------------|-------------------------|----------|------|-----------|---|------|------|------|------|------|------|
| PBCS1    | 9  | 0.476 0.463 | 55 88 46 97 185 71      | 189 353  | 0.28 | 0.5939945 | 1 | 0.93 | 0.72 | 1.21 | 0.87 | 0.52 | 1.45 |
| PLCO     | 4  | 0.338 0.407 | 28 42 4 163 205 80      | 74 448   | 2.32 | 0.1280692 | 1 | 1.33 | 0.92 | 1.93 | 1.78 | 0.85 | 3.74 |
| WHI      | 8  | 0.402 0.429 | 111 131 53 588 813 340  | 295 1741 | 1.87 | 0.1709951 | 1 | 1.13 | 0.95 | 1.35 | 1.28 | 0.90 | 1.81 |
| STAGE3   | 17 | 0.422 0.435 | 171 265 89 520 739 315  | 525 1574 | 0.44 | 0.5074477 | 1 | 1.05 | 0.91 | 1.21 | 1.10 | 0.83 | 1.47 |
| NHS2     | 8  | 0.403 0.449 | 31 43 14 105 156 71     | 88 332   | 0.72 | 0.397453  | 1 | 1.16 | 0.83 | 1.62 | 1.34 | 0.68 | 2.63 |
| PBCS2    | 11 | 0.413 0.440 | 117 165 58 226 346 140  | 340 712  | 1.20 | 0.2736666 | 1 | 1.11 | 0.92 | 1.34 | 1.23 | 0.85 | 1.79 |
| WHS      | 8  | 0.469 0.420 | 23 57 17 189 237 104    | 97 530   | 1.59 | 0.2078285 | 1 | 0.82 | 0.60 | 1.12 | 0.67 | 0.36 | 1.25 |
| PBCS 1+2 | 14 | 0.435 0.447 | 171 253 103 322 527 209 | 527 1058 | 0.36 | 0.5459978 | 1 | 1.05 | 0.90 | 1.22 | 1.10 | 0.81 | 1.48 |

Locus Alleles Chr Location Neighborhood  
rs999737 C|T 14q24.1 68104435 RAD51L1

| SUBSET   | Rank | MAF         | Geno Counts              | Subjects  | score X2 | score p-value | df | het OR | het OR 95% CI | het OR 95% CI | hom OR | hom OR 95% CI | hom OR 95% CI_u |
|----------|------|-------------|--------------------------|-----------|----------|---------------|----|--------|---------------|---------------|--------|---------------|-----------------|
| STAGE1-3 | 10   | 0.228 0.215 | 760 466 61 3130 1743 227 | 1287 5100 | 1.73     | 0.1887192     | 1  | 0.93   | 0.84          | 1.04          | 0.87   | 0.70          | 1.07            |
| NHS      | 3    | 0.239 0.209 | 105 67 10 499 278 30     | 182 807   | 1.77     | 0.1835703     | 1  | 0.83   | 0.63          | 1.09          | 0.69   | 0.39          | 1.20            |
| STAGE1-2 | 8    | 0.224 0.211 | 459 271 36 2185 1182 150 | 766 3517  | 1.45     | 0.2285036     | 1  | 0.92   | 0.80          | 1.05          | 0.84   | 0.64          | 1.11            |
| STAGE2   | 14   | 0.219 0.211 | 354 204 26 1686 904 120  | 584 2710  | 0.44     | 0.5058923     | 1  | 0.95   | 0.81          | 1.11          | 0.90   | 0.65          | 1.23            |
| PBCS1    | 3    | 0.228 0.203 | 115 62 12 219 125 9      | 189 353   | 1.14     | 0.2865018     | 1  | 0.84   | 0.62          | 1.15          | 0.71   | 0.38          | 1.33            |
| PLCO     | 7    | 0.189 0.225 | 48 24 2 262 170 16       | 74 448    | 1.14     | 0.2846391     | 1  | 1.29   | 0.81          | 2.06          | 1.67   | 0.65          | 4.25            |
| WHI      | 12   | 0.224 0.208 | 174 110 11 1100 559 83   | 295 1742  | 0.85     | 0.3562533     | 1  | 0.91   | 0.73          | 1.12          | 0.82   | 0.54          | 1.25            |
| STAGE3   | 19   | 0.235 0.226 | 302 195 25 946 562 77    | 522 1585  | 0.25     | 0.6164261     | 1  | 0.96   | 0.81          | 1.14          | 0.92   | 0.65          | 1.29            |
| NHS2     | 11   | 0.212 0.233 | 52 30 3 198 115 20       | 85 333    | 0.48     | 0.4903239     | 1  | 1.16   | 0.77          | 1.74          | 1.33   | 0.59          | 3.03            |
| PBCS2    | 16   | 0.234 0.224 | 198 125 17 422 248 34    | 340 704   | 0.12     | 0.7244246     | 1  | 0.96   | 0.77          | 1.20          | 0.92   | 0.59          | 1.44            |
| WHS      | 9    | 0.258 0.224 | 52 40 5 326 199 23       | 97 548    | 1.20     | 0.2733422     | 1  | 0.81   | 0.56          | 1.18          | 0.66   | 0.31          | 1.39            |
| PBCS 1+2 | 9    | 0.232 0.217 | 312 187 29 640 372 43    | 528 1055  | 0.92     | 0.3385112     | 1  | 0.92   | 0.76          | 1.10          | 0.84   | 0.59          | 1.20            |

Locus Alleles Chr Location Neighborhood  
rs2391406 T|G 13q33.3 106586873

| SUBSET   | Rank | MAF         | Geno Counts               | Subjects  | score X2 | score p-value | df | het OR | het OR 95% CI | het OR 95% CI | hom OR | hom OR 95% CI | hom OR 95% CI_u |
|----------|------|-------------|---------------------------|-----------|----------|---------------|----|--------|---------------|---------------|--------|---------------|-----------------|
| STAGE1-3 | 11   | 0.360 0.367 | 511 627 150 2027 2376 676 | 1288 5079 | 1.60     | 0.2065087     | 1  | 1.06   | 0.97          | 1.17          | 1.13   | 0.94          | 1.36            |
| NHS      | 11   | 0.358 0.366 | 72 91 20 323 377 107      | 183 807   | 0.16     | 0.6876411     | 1  | 1.05   | 0.82          | 1.34          | 1.10   | 0.68          | 1.80            |
| STAGE1-2 | 11   | 0.354 0.364 | 308 373 85 1393 1684 438  | 766 3515  | 0.92     | 0.3380219     | 1  | 1.06   | 0.94          | 1.20          | 1.13   | 0.88          | 1.43            |
| STAGE2   | 12   | 0.353 0.364 | 236 282 65 1070 1307 331  | 583 2708  | 0.70     | 0.401653      | 1  | 1.06   | 0.92          | 1.22          | 1.13   | 0.85          | 1.49            |
| PBCS1    | 12   | 0.362 0.375 | 78 84 26 125 190 37       | 188 352   | 0.21     | 0.6435178     | 1  | 1.07   | 0.81          | 1.41          | 1.14   | 0.66          | 1.98            |
| PLCO     | 15   | 0.345 0.360 | 29 39 6 180 213 55        | 74 448    | 0.12     | 0.7307059     | 1  | 1.07   | 0.73          | 1.56          | 1.14   | 0.54          | 2.43            |
| WHI      | 11   | 0.344 0.365 | 123 141 31 693 828 221    | 295 1742  | 0.93     | 0.3352564     | 1  | 1.10   | 0.91          | 1.32          | 1.20   | 0.83          | 1.75            |
| STAGE3   | 12   | 0.368 0.373 | 203 253 65 634 693 238    | 521 1565  | 0.80     | 0.3701591     | 1  | 1.07   | 0.92          | 1.24          | 1.14   | 0.85          | 1.54            |
| NHS2     | 10   | 0.359 0.392 | 34 41 10 129 154 56       | 85 339    | 0.53     | 0.4660691     | 1  | 1.14   | 0.80          | 1.61          | 1.30   | 0.65          | 2.60            |
| PBCS2    | 18   | 0.382 0.381 | 126 171 45 275 321 108    | 342 704   | 0.05     | 0.8158541     | 1  | 1.02   | 0.85          | 1.24          | 1.05   | 0.72          | 1.53            |
| WHS      | 16   | 0.324 0.351 | 43 41 10 230 218 74       | 94 522    | 0.30     | 0.58661       | 1  | 1.09   | 0.79          | 1.52          | 1.20   | 0.62          | 2.30            |
| PBCS 1+2 | 17   | 0.375 0.379 | 204 256 71 400 510 145    | 531 1055  | 0.15     | 0.6963134     | 1  | 1.03   | 0.88          | 1.21          | 1.06   | 0.78          | 1.45            |

Locus Alleles Chr Location Neighborhood  
rs3817198 T|C 11p15.5 1865582 LSP1

| SUBSET   | Rank | MAF         | Geno Counts               | Subjects  | score X2 | score p-value | df | het OR | het OR 95% CI | het OR 95% CI | hom OR | hom OR 95% CI | hom OR 95% CI_u |
|----------|------|-------------|---------------------------|-----------|----------|---------------|----|--------|---------------|---------------|--------|---------------|-----------------|
| STAGE1-3 | 12   | 0.323 0.335 | 582 578 126 2294 2211 606 | 1286 5111 | 1.09     | 0.2959837     | 1  | 1.05   | 0.96          | 1.15          | 1.11   | 0.92          | 1.33            |
| NHS      | 6    | 0.308 0.328 | 82 88 12 373 339 95       | 182 807   | 0.56     | 0.4541771     | 1  | 1.10   | 0.86          | 1.40          | 1.21   | 0.74          | 1.97            |
| STAGE1-2 | 23   | 0.334 0.337 | 329 359 76 1564 1530 419  | 764 3513  | 0.00     | 0.9735068     | 1  | 1.00   | 0.89          | 1.13          | 1.00   | 0.79          | 1.27            |
| STAGE2   | 17   | 0.343 0.340 | 247 271 64 1191 1191 324  | 582 2706  | 0.18     | 0.6731977     | 1  | 0.97   | 0.85          | 1.11          | 0.94   | 0.72          | 1.24            |
| PBCS1    | 17   | 0.321 0.326 | 84 86 17 161 150 39       | 187 350   | 0.01     | 0.905289      | 1  | 1.02   | 0.77          | 1.33          | 1.03   | 0.60          | 1.78            |
| PLCO     | 9    | 0.365 0.334 | 28 38 8 190 215 42        | 74 447    | 0.49     | 0.4819824     | 1  | 0.87   | 0.59          | 1.28          | 0.76   | 0.35          | 1.64            |
| WHI      | 21   | 0.346 0.343 | 126 134 35 768 753 221    | 295 1742  | 0.01     | 0.9247518     | 1  | 0.99   | 0.83          | 1.19          | 0.98   | 0.68          | 1.41            |
| STAGE3   | 6    | 0.308 0.331 | 252 220 51 727 682 187    | 523 1596  | 2.40     | 0.1210714     | 1  | 1.13   | 0.97          | 1.31          | 1.27   | 0.94          | 1.73            |
| NHS2     | 1    | 0.259 0.324 | 50 29 8 160 145 39        | 87 344    | 3.68     | 0.0551632     | 1  | 1.44   | 0.99          | 2.10          | 2.08   | 0.98          | 4.40            |
| PBCS2    | 20   | 0.333 0.330 | 154 148 40 326 301 84     | 342 711   | 0.04     | 0.8492144     | 1  | 0.98   | 0.81          | 1.19          | 0.96   | 0.66          | 1.41            |

|          |    |             |                        |          |      |           |   |      |      |      |      |      |      |
|----------|----|-------------|------------------------|----------|------|-----------|---|------|------|------|------|------|------|
| WHS      | 5  | 0.261 0.336 | 48 43 3 241 236 64     | 94 541   | 2.74 | 0.0976922 | 1 | 1.36 | 0.94 | 1.96 | 1.85 | 0.89 | 3.83 |
| PBCS 1+2 | 24 | 0.327 0.327 | 239 233 56 490 450 123 | 528 1063 | 0.00 | 0.9834241 | 1 | 1.00 | 0.85 | 1.17 | 1.00 | 0.73 | 1.36 |

Locus rs3134615 Alleles G|T Chr 1p34.2 Location 40134653 Neighborhood TRIT1,MYCL1

| SUBSET   | Rank | MAF         | Geno Counts              | Subjects  | score X2 | score p-value | df | het OR | het OR 95% CI | het OR 95% CI | hom OR | hom OR 95% CI | hom OR 95% CI_u |
|----------|------|-------------|--------------------------|-----------|----------|---------------|----|--------|---------------|---------------|--------|---------------|-----------------|
| STAGE1-3 | 13   | 0.250 0.243 | 722 489 77 2906 1906 288 | 1288 5100 | 0.98     | 0.3221761     | 1  | 0.95   | 0.86          | 1.05          | 0.90   | 0.73          | 1.11            |
| NHS      | 20   | 0.260 0.262 | 101 69 13 433 325 49     | 183 807   | 0.01     | 0.9219257     | 1  | 1.01   | 0.78          | 1.32          | 1.03   | 0.60          | 1.75            |
| STAGE1-2 | 14   | 0.256 0.248 | 420 302 45 1984 1323 210 | 767 3517  | 0.49     | 0.4838483     | 1  | 0.95   | 0.84          | 1.09          | 0.91   | 0.70          | 1.18            |
| STAGE2   | 11   | 0.254 0.244 | 319 233 32 1551 998 161  | 584 2710  | 0.71     | 0.3981555     | 1  | 0.94   | 0.81          | 1.09          | 0.88   | 0.65          | 1.19            |
| PBCS1    | 18   | 0.235 0.231 | 106 77 6 213 117 23      | 189 353   | 0.01     | 0.928855      | 1  | 1.01   | 0.75          | 1.37          | 1.03   | 0.56          | 1.87            |
| PLCO     | 17   | 0.264 0.253 | 38 33 3 247 175 26       | 74 448    | 0.09     | 0.7646082     | 1  | 0.94   | 0.62          | 1.42          | 0.88   | 0.38          | 2.03            |
| WHI      | 14   | 0.264 0.247 | 160 114 21 985 654 103   | 295 1742  | 0.55     | 0.4589726     | 1  | 0.93   | 0.76          | 1.13          | 0.86   | 0.57          | 1.28            |
| STAGE3   | 16   | 0.241 0.234 | 302 188 32 922 585 79    | 522 1586  | 0.50     | 0.4814003     | 1  | 0.94   | 0.79          | 1.11          | 0.89   | 0.63          | 1.24            |
| NHS2     | 21   | 0.229 0.241 | 52 24 7 190 124 18       | 83 332    | 0.03     | 0.8568281     | 1  | 1.04   | 0.69          | 1.55          | 1.08   | 0.48          | 2.42            |
| PBCS2    | 21   | 0.230 0.225 | 202 124 17 427 240 39    | 343 706   | 0.02     | 0.876698      | 1  | 0.98   | 0.79          | 1.22          | 0.97   | 0.62          | 1.50            |
| WHS      | 6    | 0.292 0.242 | 48 40 8 305 221 22       | 96 548    | 2.46     | 0.1164633     | 1  | 0.75   | 0.52          | 1.08          | 0.56   | 0.27          | 1.16            |
| PBCS 1+2 | 20   | 0.232 0.226 | 308 200 23 640 355 61    | 531 1056  | 0.01     | 0.9026813     | 1  | 0.99   | 0.83          | 1.18          | 0.98   | 0.69          | 1.39            |

Locus rs17570439 Alleles T|C Chr 1p34.2 Location 40096797 Neighborhood TRIT1

| SUBSET   | Rank | MAF         | Geno Counts              | Subjects  | score X2 | score p-value | df | het OR | het OR 95% CI | het OR 95% CI | hom OR | hom OR 95% CI | hom OR 95% CI_u |
|----------|------|-------------|--------------------------|-----------|----------|---------------|----|--------|---------------|---------------|--------|---------------|-----------------|
| STAGE1-3 | 14   | 0.231 0.224 | 759 465 65 3076 1762 263 | 1289 5101 | 0.91     | 0.3393006     | 1  | 0.95   | 0.85          | 1.06          | 0.90   | 0.73          | 1.11            |
| NHS      | 13   | 0.238 0.245 | 107 65 11 457 304 46     | 183 807   | 0.09     | 0.767612      | 1  | 1.04   | 0.79          | 1.37          | 1.09   | 0.63          | 1.87            |
| STAGE1-2 | 16   | 0.233 0.229 | 446 283 37 2104 1217 196 | 766 3517  | 0.18     | 0.6743908     | 1  | 0.97   | 0.85          | 1.11          | 0.94   | 0.72          | 1.23            |
| STAGE2   | 15   | 0.232 0.224 | 339 218 26 1647 913 150  | 583 2710  | 0.43     | 0.5118091     | 1  | 0.95   | 0.81          | 1.11          | 0.90   | 0.66          | 1.23            |
| PBCS1    | 15   | 0.214 0.215 | 113 71 5 223 108 22      | 189 353   | 0.06     | 0.8036849     | 1  | 1.04   | 0.77          | 1.41          | 1.08   | 0.59          | 1.99            |
| PLCO     | 23   | 0.243 0.238 | 40 32 2 259 165 24       | 74 448    | 0.02     | 0.900189      | 1  | 0.97   | 0.64          | 1.49          | 0.95   | 0.40          | 2.22            |
| WHI      | 17   | 0.238 0.225 | 171 106 17 1053 594 95   | 294 1742  | 0.35     | 0.5515123     | 1  | 0.94   | 0.76          | 1.15          | 0.88   | 0.58          | 1.33            |
| STAGE3   | 10   | 0.228 0.214 | 313 182 28 972 545 67    | 523 1584  | 1.11     | 0.2911508     | 1  | 0.91   | 0.77          | 1.08          | 0.83   | 0.59          | 1.17            |
| NHS2     | 18   | 0.235 0.229 | 51 28 6 194 119 16       | 85 329    | 0.10     | 0.7530559     | 1  | 0.94   | 0.63          | 1.40          | 0.88   | 0.39          | 1.97            |
| PBCS2    | 19   | 0.215 0.210 | 211 115 16 448 228 35    | 342 711   | 0.04     | 0.8325112     | 1  | 0.98   | 0.78          | 1.22          | 0.95   | 0.61          | 1.49            |
| WHS      | 4    | 0.266 0.211 | 51 39 6 330 198 16       | 96 544    | 3.11     | 0.0777223     | 1  | 0.71   | 0.49          | 1.04          | 0.51   | 0.24          | 1.08            |
| PBCS 1+2 | 23   | 0.215 0.211 | 324 186 21 671 336 57    | 531 1064  | 0.00     | 0.9750411     | 1  | 1.00   | 0.83          | 1.19          | 0.99   | 0.69          | 1.42            |

Locus rs11077820 Alleles T|C Chr 17q25.1 Location 71966263 Neighborhood UBE2O,AANAT

| SUBSET   | Rank | MAF         | Geno Counts               | Subjects  | score X2 | score p-value | df | het OR | het OR 95% CI | het OR 95% CI | hom OR | hom OR 95% CI | hom OR 95% CI_u |
|----------|------|-------------|---------------------------|-----------|----------|---------------|----|--------|---------------|---------------|--------|---------------|-----------------|
| STAGE1-3 | 15   | 0.360 0.367 | 533 588 171 2093 2255 738 | 1292 5086 | 0.42     | 0.5153368     | 1  | 1.03   | 0.94          | 1.13          | 1.06   | 0.89          | 1.27            |
| NHS      | 17   | 0.374 0.374 | 73 83 27 329 353 125      | 183 807   | 0.03     | 0.858473      | 1  | 0.98   | 0.78          | 1.23          | 0.96   | 0.60          | 1.52            |
| STAGE1-2 | 21   | 0.362 0.368 | 311 356 100 1447 1549 517 | 767 3513  | 0.01     | 0.9181467     | 1  | 1.01   | 0.90          | 1.13          | 1.01   | 0.80          | 1.27            |
| STAGE2   | 22   | 0.359 0.366 | 238 273 73 1118 1196 392  | 584 2706  | 0.04     | 0.8403518     | 1  | 1.01   | 0.89          | 1.16          | 1.03   | 0.79          | 1.34            |
| PBCS1    | 1    | 0.381 0.334 | 74 86 29 160 150 43       | 189 353   | 2.24     | 0.1343984     | 1  | 0.82   | 0.63          | 1.06          | 0.67   | 0.40          | 1.13            |
| PLCO     | 18   | 0.358 0.354 | 30 35 9 188 200 58        | 74 446    | 0.08     | 0.7795843     | 1  | 0.95   | 0.66          | 1.37          | 0.90   | 0.43          | 1.88            |
| WHI      | 7    | 0.342 0.378 | 124 140 31 694 776 270    | 295 1740  | 2.61     | 0.1061023     | 1  | 1.16   | 0.97          | 1.39          | 1.35   | 0.94          | 1.95            |
| STAGE3   | 14   | 0.356 0.365 | 222 232 71 646 707 221    | 525 1574  | 0.74     | 0.3912237     | 1  | 1.07   | 0.92          | 1.24          | 1.14   | 0.85          | 1.53            |
| NHS2     | 9    | 0.341 0.373 | 41 30 14 133 153 48       | 85 334    | 0.64     | 0.422953      | 1  | 1.15   | 0.82          | 1.63          | 1.33   | 0.66          | 2.65            |
| PBCS2    | 13   | 0.366 0.382 | 141 153 49 269 335 102    | 343 706   | 0.44     | 0.507321      | 1  | 1.07   | 0.88          | 1.29          | 1.14   | 0.78          | 1.66            |
| WHS      | 23   | 0.335 0.338 | 40 49 8 244 219 71        | 97 534    | 0.01     | 0.9372737     | 1  | 1.01   | 0.73          | 1.40          | 1.03   | 0.54          | 1.96            |
| PBCS 1+2 | 19   | 0.371 0.366 | 215 239 78 429 484 145    | 532 1058  | 0.08     | 0.7710778     | 1  | 0.98   | 0.84          | 1.14          | 0.96   | 0.70          | 1.30            |

Locus rs12622050 Alleles G|A Chr 2q11.2 Location 100945886 Neighborhood NPAS2

| SUBSET   | Rank | MAF         | Geno Counts              | Subjects  | score X2 | score p-value | df | het OR | het OR 95% CI | het OR 95% CI | hom OR | hom OR 95% CI | hom OR 95% CI_u |
|----------|------|-------------|--------------------------|-----------|----------|---------------|----|--------|---------------|---------------|--------|---------------|-----------------|
| STAGE1-3 | 16   | 0.225 0.209 | 779 439 70 3197 1647 236 | 1288 5080 | 0.42     | 0.5166076     | 1  | 0.97   | 0.87          | 1.07          | 0.93   | 0.75          | 1.15            |
| NHS      | 21   | 0.191 0.189 | 122 52 9 529 251 27      | 183 807   | 0.00     | 0.971631      | 1  | 0.99   | 0.74          | 1.33          | 0.99   | 0.55          | 1.77            |
| STAGE1-2 | 17   | 0.202 0.200 | 492 240 35 2262 1101 152 | 767 3515  | 0.10     | 0.7466597     | 1  | 1.02   | 0.89          | 1.18          | 1.05   | 0.79          | 1.38            |
| STAGE2   | 18   | 0.205 0.203 | 370 188 26 1733 850 125  | 584 2708  | 0.15     | 0.6979016     | 1  | 1.03   | 0.88          | 1.21          | 1.06   | 0.78          | 1.46            |
| PBCS1    | 5    | 0.222 0.249 | 114 66 9 204 121 27      | 189 352   | 0.90     | 0.343162      | 1  | 1.15   | 0.86          | 1.55          | 1.33   | 0.74          | 2.40            |
| PLCO     | 22   | 0.203 0.195 | 47 24 3 288 145 15       | 74 448    | 0.03     | 0.8526203     | 1  | 0.96   | 0.61          | 1.50          | 0.92   | 0.38          | 2.24            |
| WHI      | 19   | 0.198 0.194 | 192 89 14 1138 530 73    | 295 1741  | 0.06     | 0.812432      | 1  | 0.97   | 0.78          | 1.21          | 0.95   | 0.61          | 1.47            |
| STAGE3   | 7    | 0.258 0.228 | 287 199 35 936 547 83    | 521 1566  | 2.08     | 0.1493254     | 1  | 0.88   | 0.75          | 1.05          | 0.78   | 0.56          | 1.09            |
| NHS2     | 20   | 0.204 0.216 | 51 27 3 202 112 15       | 81 329    | 0.05     | 0.824949      | 1  | 1.05   | 0.68          | 1.62          | 1.10   | 0.46          | 2.62            |
| PBCS2    | 6    | 0.278 0.245 | 177 141 25 402 254 45    | 343 701   | 2.21     | 0.1371565     | 1  | 0.85   | 0.69          | 1.05          | 0.73   | 0.48          | 1.11            |
| WHS      | 13   | 0.232 0.212 | 59 31 7 332 181 23       | 97 536    | 0.45     | 0.5004475     | 1  | 0.88   | 0.61          | 1.27          | 0.78   | 0.37          | 1.63            |
| PBCS 1+2 | 13   | 0.258 0.247 | 291 207 34 605 374 73    | 532 1052  | 0.40     | 0.5293969     | 1  | 0.95   | 0.80          | 1.12          | 0.90   | 0.64          | 1.26            |

Locus Alleles Chr Location Neighborhood  
rs2303659 G|A 11q24.3 129326474 PRDM10

| SUBSET   | Rank | MAF         | Geno Counts          | Subjects  | score X2 | score p-value | df | het OR | het OR 95% CI | het OR 95% CI | hom OR | hom OR 95% CI | hom OR 95% CI_u |
|----------|------|-------------|----------------------|-----------|----------|---------------|----|--------|---------------|---------------|--------|---------------|-----------------|
| STAGE1-3 | 17   | 0.024 0.026 | 1229 59 2 4833 251 9 | 1290 5093 | 0.40     | 0.5278626     | 1  | 1.09   | 0.83          | 1.45          | 1.20   | 0.68          | 2.10            |
| NHS      | 7    | 0.022 0.026 | 175 8 0 765 42 0     | 183 807   | 0.53     | 0.4665534     | 1  | 1.34   | 0.61          | 2.93          | 1.79   | 0.37          | 8.58            |
| STAGE1-2 | 15   | 0.022 0.025 | 733 34 0 3341 174 2  | 767 3517  | 0.46     | 0.4990331     | 1  | 1.14   | 0.78          | 1.67          | 1.30   | 0.61          | 2.77            |
| STAGE2   | 16   | 0.022 0.025 | 558 26 0 2576 132 2  | 584 2710  | 0.21     | 0.6455982     | 1  | 1.11   | 0.72          | 1.71          | 1.23   | 0.51          | 2.92            |
| PBCS1    | 16   | 0.021 0.024 | 181 8 0 336 17 0     | 189 353   | 0.02     | 0.8763622     | 1  | 1.07   | 0.45          | 2.57          | 1.15   | 0.20          | 6.60            |
| PLCO     | 16   | 0.020 0.026 | 71 3 0 425 23 0      | 74 448    | 0.09     | 0.7592955     | 1  | 1.21   | 0.35          | 4.22          | 1.47   | 0.12          | 17.78           |
| WHI      | 23   | 0.025 0.025 | 280 15 0 1655 86 1   | 295 1742  | 0.00     | 0.9922444     | 1  | 1.00   | 0.57          | 1.76          | 1.01   | 0.33          | 3.08            |
| STAGE3   | 23   | 0.028 0.029 | 496 25 2 1493 77 7   | 523 1577  | 0.05     | 0.8149234     | 1  | 1.05   | 0.69          | 1.59          | 1.10   | 0.48          | 2.54            |
| NHS2     | 24   | 0.000 0.030 | 84 0 0 321 14 3      | 84 338    |          |               |    |        |               |               |        |               |                 |
| PBCS2    | 14   | 0.033 0.028 | 322 21 1 669 40 0    | 344 709   | 0.40     | 0.5257804     | 1  | 0.84   | 0.50          | 1.43          | 0.71   | 0.25          | 2.03            |
| WHS      | 15   | 0.032 0.029 | 90 4 1 503 23 4      | 95 530    | 0.33     | 0.565736      | 1  | 0.79   | 0.36          | 1.76          | 0.63   | 0.13          | 3.10            |
| PBCS 1+2 | 15   | 0.029 0.027 | 503 29 1 1004 57 0   | 533 1061  | 0.23     | 0.6350156     | 1  | 0.90   | 0.57          | 1.41          | 0.80   | 0.33          | 1.98            |

Locus Alleles Chr Location Neighborhood  
rs37936 A|G 7q21.11 79806994

| SUBSET   | Rank | MAF         | Geno Counts               | Subjects  | score X2 | score p-value | df | het OR | het OR 95% CI | het OR 95% CI | hom OR | hom OR 95% CI | hom OR 95% CI_u |
|----------|------|-------------|---------------------------|-----------|----------|---------------|----|--------|---------------|---------------|--------|---------------|-----------------|
| STAGE1-3 | 18   | 0.370 0.367 | 513 560 186 2015 2294 686 | 1259 4995 | 0.24     | 0.625167      | 1  | 0.98   | 0.89          | 1.07          | 0.96   | 0.79          | 1.15            |
| NHS      | 16   | 0.369 0.362 | 77 68 31 333 343 115      | 176 791   | 0.07     | 0.7954004     | 1  | 0.97   | 0.77          | 1.22          | 0.94   | 0.59          | 1.50            |
| STAGE1-2 | 13   | 0.376 0.362 | 227 246 88 1268 1397 418  | 561 3083  | 0.77     | 0.379443      | 1  | 0.94   | 0.83          | 1.08          | 0.89   | 0.69          | 1.16            |
| STAGE2   | 10   | 0.379 0.362 | 150 178 57 935 1054 303   | 385 2292  | 0.78     | 0.3762784     | 1  | 0.93   | 0.80          | 1.09          | 0.87   | 0.64          | 1.19            |
| PLCO     | 11   | 0.396 0.372 | 26 35 11 181 186 69       | 72 436    | 0.39     | 0.5313266     | 1  | 0.89   | 0.63          | 1.27          | 0.80   | 0.39          | 1.62            |
| WHI      | 10   | 0.387 0.362 | 111 131 46 680 800 212    | 288 1692  | 1.21     | 0.2709996     | 1  | 0.90   | 0.75          | 1.08          | 0.81   | 0.56          | 1.18            |
| STAGE3   | 15   | 0.382 0.374 | 203 238 80 618 750 218    | 521 1586  | 0.61     | 0.4356202     | 1  | 0.94   | 0.81          | 1.09          | 0.89   | 0.66          | 1.20            |
| NHS2     | 13   | 0.419 0.404 | 32 36 18 122 166 56       | 86 344    | 0.30     | 0.5868069     | 1  | 0.91   | 0.65          | 1.28          | 0.83   | 0.42          | 1.63            |
| PBCS2    | 22   | 0.362 0.360 | 134 163 41 283 324 88     | 338 695   | 0.00     | 0.9536473     | 1  | 0.99   | 0.82          | 1.21          | 0.99   | 0.67          | 1.46            |
| WHS      | 11   | 0.418 0.373 | 37 39 21 213 260 74       | 97 547    | 0.79     | 0.3730722     | 1  | 0.87   | 0.63          | 1.19          | 0.75   | 0.40          | 1.41            |
| PBCS 1+2 | 8    | 0.347 0.366 | 217 239 59 412 471 138    | 515 1021  | 0.94     | 0.331952      | 1  | 1.08   | 0.92          | 1.27          | 1.17   | 0.85          | 1.61            |

Locus Alleles Chr Location Neighborhood  
rs7121523 G|A 11p15.4 7556781 PPF1BP2

| SUBSET   | Rank | MAF         | Geno Counts              | Subjects  | score X2 | score p-value | df | het OR | het OR 95% CI | het OR 95% CI | hom OR | hom OR 95% CI | hom OR 95% CI_u |
|----------|------|-------------|--------------------------|-----------|----------|---------------|----|--------|---------------|---------------|--------|---------------|-----------------|
| STAGE1-3 | 19   | 0.162 0.160 | 908 352 33 3629 1305 166 | 1293 5100 | 0.16     | 0.6915283     | 1  | 0.98   | 0.87          | 1.10          | 0.95   | 0.75          | 1.21            |
| NHS      | 14   | 0.164 0.168 | 129 48 6 572 199 36      | 183 807   | 0.07     | 0.7854553     | 1  | 1.04   | 0.78          | 1.40          | 1.08   | 0.60          | 1.95            |
| STAGE1-2 | 6    | 0.175 0.161 | 522 222 23 2508 881 126  | 767 3515  | 1.79     | 0.1807751     | 1  | 0.91   | 0.78          | 1.05          | 0.82   | 0.61          | 1.10            |
| STAGE2   | 4    | 0.178 0.159 | 393 174 17 1936 682 90   | 584 2708  | 2.98     | 0.0843247     | 1  | 0.86   | 0.73          | 1.02          | 0.75   | 0.53          | 1.04            |
| PBCS1    | 11   | 0.148 0.156 | 134 54 1 259 76 17       | 189 352   | 0.23     | 0.6334951     | 1  | 1.09   | 0.77          | 1.54          | 1.18   | 0.59          | 2.36            |
| PLCO     | 1    | 0.230 0.160 | 41 32 1 318 117 13       | 74 448    | 4.77     | 0.0289811     | 1  | 0.61   | 0.39          | 0.96          | 0.37   | 0.15          | 0.91            |

|          |    |             |                        |          |      |           |   |      |      |      |      |      |      |
|----------|----|-------------|------------------------|----------|------|-----------|---|------|------|------|------|------|------|
| WHI      | 5  | 0.186 0.157 | 200 80 15 1244 446 51  | 295 1741 | 3.37 | 0.0664428 | 1 | 0.81 | 0.65 | 1.01 | 0.66 | 0.42 | 1.03 |
| STAGE3   | 9  | 0.143 0.159 | 386 130 10 1121 424 40 | 526 1585 | 1.12 | 0.2890882 | 1 | 1.12 | 0.91 | 1.37 | 1.24 | 0.83 | 1.87 |
| NHS2     | 14 | 0.161 0.151 | 61 24 2 246 82 10      | 87 338   | 0.18 | 0.6721855 | 1 | 0.91 | 0.58 | 1.43 | 0.82 | 0.33 | 2.03 |
| PBCS2    | 7  | 0.136 0.158 | 254 81 6 496 184 18    | 341 698  | 1.66 | 0.1980188 | 1 | 1.19 | 0.91 | 1.55 | 1.41 | 0.83 | 2.40 |
| WHS      | 17 | 0.148 0.166 | 71 25 2 379 158 12     | 98 549   | 0.24 | 0.621692  | 1 | 1.12 | 0.72 | 1.74 | 1.25 | 0.52 | 3.03 |
| PBCS 1+2 | 5  | 0.141 0.157 | 388 135 7 755 260 35   | 530 1050 | 1.84 | 0.1744913 | 1 | 1.16 | 0.94 | 1.42 | 1.34 | 0.88 | 2.03 |

Locus Alleles Chr Location Neighborhood  
rs998592 G|A 16p13.13 11107179 CLEC16A

| SUBSET   | Rank | MAF         | Geno Counts               | Subjects  | score X2 | score p-value | df | het OR | het OR 95% CI | het OR 95% CI | hom OR | hom OR 95% CI | hom OR 95% CI_u |
|----------|------|-------------|---------------------------|-----------|----------|---------------|----|--------|---------------|---------------|--------|---------------|-----------------|
| STAGE1-3 | 20   | 0.404 0.417 | 446 647 199 1696 2557 852 | 1292 5105 | 0.14     | 0.7044645     | 1  | 1.02   | 0.93          | 1.12          | 1.04   | 0.86          | 1.24            |
| NHS      | 18   | 0.434 0.429 | 54 99 30 253 415 139      | 183 807   | 0.03     | 0.8693778     | 1  | 0.98   | 0.77          | 1.24          | 0.96   | 0.60          | 1.55            |
| STAGE1-2 | 12   | 0.403 0.424 | 264 388 115 1133 1787 597 | 767 3517  | 0.82     | 0.3659831     | 1  | 1.06   | 0.94          | 1.19          | 1.11   | 0.88          | 1.41            |
| STAGE2   | 9    | 0.393 0.422 | 210 289 85 880 1372 458   | 584 2710  | 1.30     | 0.2536988     | 1  | 1.08   | 0.95          | 1.24          | 1.17   | 0.89          | 1.53            |
| PBCS1    | 21   | 0.368 0.368 | 74 91 24 141 164 48       | 189 353   | 0.00     | 0.9739833     | 1  | 1.00   | 0.76          | 1.30          | 0.99   | 0.58          | 1.68            |
| PLCO     | 10   | 0.426 0.393 | 25 35 14 162 220 66       | 74 448    | 0.41     | 0.5200337     | 1  | 0.89   | 0.62          | 1.28          | 0.79   | 0.38          | 1.63            |
| WHI      | 4    | 0.403 0.444 | 100 152 43 517 903 322    | 295 1742  | 3.38     | 0.0660823     | 1  | 1.19   | 0.99          | 1.43          | 1.41   | 0.98          | 2.04            |
| STAGE3   | 21   | 0.407 0.403 | 182 260 84 563 771 255    | 526 1589  | 0.21     | 0.6495011     | 1  | 0.97   | 0.83          | 1.12          | 0.93   | 0.70          | 1.25            |
| NHS2     | 4    | 0.482 0.425 | 22 43 19 115 159 64       | 84 338    | 1.69     | 0.1941551     | 1  | 0.80   | 0.57          | 1.12          | 0.64   | 0.32          | 1.26            |
| PBCS2    | 17   | 0.397 0.386 | 122 171 51 266 333 105    | 344 704   | 0.12     | 0.7285797     | 1  | 0.97   | 0.80          | 1.17          | 0.94   | 0.64          | 1.37            |
| WHS      | 12   | 0.378 0.412 | 38 46 14 182 279 86       | 98 547    | 0.48     | 0.4877719     | 1  | 1.12   | 0.81          | 1.56          | 1.26   | 0.66          | 2.42            |
| PBCS 1+2 | 18   | 0.386 0.380 | 196 261 75 407 496 153    | 532 1056  | 0.15     | 0.7003384     | 1  | 0.97   | 0.83          | 1.13          | 0.94   | 0.69          | 1.28            |

Locus Alleles Chr Location Neighborhood  
rs724244 C|T 3p24.1 27217157 NEK10

| SUBSET   | Rank | MAF         | Geno Counts              | Subjects  | score X2 | score p-value | df | het OR | het OR 95% CI | het OR 95% CI | hom OR | hom OR 95% CI | hom OR 95% CI_u |
|----------|------|-------------|--------------------------|-----------|----------|---------------|----|--------|---------------|---------------|--------|---------------|-----------------|
| STAGE1-3 | 21   | 0.267 0.273 | 597 424 83 2281 1695 328 | 1104 4304 | 0.10     | 0.7522917     | 1  | 1.02   | 0.91          | 1.13          | 1.04   | 0.83          | 1.28            |
| STAGE1-2 | 20   | 0.276 0.275 | 308 228 47 1429 1071 209 | 583 2709  | 0.04     | 0.8342136     | 1  | 0.98   | 0.85          | 1.14          | 0.97   | 0.73          | 1.29            |
| STAGE2   | 21   | 0.276 0.275 | 308 228 47 1429 1071 209 | 583 2709  | 0.04     | 0.8352394     | 1  | 0.98   | 0.85          | 1.14          | 0.97   | 0.73          | 1.29            |
| PBCS1    | 8    | 0.250 0.265 | 106 70 12 198 123 32     | 188 353   | 0.37     | 0.5452786     | 1  | 1.09   | 0.82          | 1.45          | 1.19   | 0.68          | 2.09            |
| PLCO     | 21   | 0.257 0.271 | 44 22 8 235 182 30       | 74 447    | 0.06     | 0.8113677     | 1  | 1.05   | 0.70          | 1.58          | 1.10   | 0.49          | 2.50            |
| WHI      | 16   | 0.295 0.280 | 145 126 24 901 708 133   | 295 1742  | 0.46     | 0.4956524     | 1  | 0.93   | 0.77          | 1.14          | 0.87   | 0.59          | 1.29            |
| STAGE3   | 18   | 0.258 0.270 | 290 196 37 852 624 119   | 523 1595  | 0.39     | 0.5341548     | 1  | 1.05   | 0.90          | 1.24          | 1.11   | 0.80          | 1.53            |
| NHS2     | 19   | 0.286 0.281 | 45 30 9 176 134 28       | 84 338    | 0.09     | 0.7675269     | 1  | 0.95   | 0.65          | 1.37          | 0.89   | 0.43          | 1.88            |
| PBCS2    | 9    | 0.244 0.265 | 198 121 23 381 280 48    | 342 709   | 1.23     | 0.2670358     | 1  | 1.13   | 0.91          | 1.39          | 1.27   | 0.83          | 1.94            |
| WHS      | 14   | 0.284 0.270 | 47 45 5 295 210 43       | 97 548    | 0.38     | 0.5379449     | 1  | 0.90   | 0.63          | 1.27          | 0.80   | 0.40          | 1.62            |
| PBCS 1+2 | 6    | 0.245 0.265 | 303 191 34 579 403 80    | 528 1062  | 1.77     | 0.1829368     | 1  | 1.12   | 0.95          | 1.33          | 1.26   | 0.90          | 1.77            |

Locus Alleles Chr Location Neighborhood  
rs10850145 C|T 12q24.13 112428512

| SUBSET   | Rank | MAF         | Geno Counts              | Subjects  | score X2 | score p-value | df | het OR | het OR 95% CI | het OR 95% CI | hom OR | hom OR 95% CI | hom OR 95% CI_u |
|----------|------|-------------|--------------------------|-----------|----------|---------------|----|--------|---------------|---------------|--------|---------------|-----------------|
| STAGE1-3 | 22   | 0.108 0.109 | 1029 245 17 4054 1012 52 | 1291 5118 | 0.01     | 0.9288391     | 1  | 1.01   | 0.87          | 1.16          | 1.01   | 0.76          | 1.35            |
| NHS      | 9    | 0.117 0.108 | 145 33 5 642 155 10      | 183 807   | 0.39     | 0.5305295     | 1  | 0.89   | 0.63          | 1.27          | 0.80   | 0.39          | 1.62            |
| STAGE1-2 | 19   | 0.108 0.110 | 612 144 11 2781 693 41   | 767 3515  | 0.06     | 0.8105431     | 1  | 1.02   | 0.85          | 1.23          | 1.05   | 0.73          | 1.51            |
| STAGE2   | 13   | 0.105 0.111 | 467 111 6 2139 538 31    | 584 2708  | 0.46     | 0.4988151     | 1  | 1.08   | 0.87          | 1.33          | 1.16   | 0.76          | 1.77            |
| PBCS1    | 4    | 0.101 0.123 | 152 36 1 270 79 4        | 189 353   | 0.99     | 0.3204464     | 1  | 1.24   | 0.81          | 1.88          | 1.53   | 0.66          | 3.53            |
| PLCO     | 12   | 0.122 0.106 | 56 18 0 357 87 4         | 74 448    | 0.21     | 0.6490349     | 1  | 0.88   | 0.50          | 1.55          | 0.77   | 0.25          | 2.39            |
| WHI      | 18   | 0.107 0.110 | 236 55 4 1378 341 21     | 295 1740  | 0.07     | 0.7941152     | 1  | 1.04   | 0.78          | 1.38          | 1.08   | 0.61          | 1.91            |
| STAGE3   | 24   | 0.108 0.106 | 417 101 6 1275 319 11    | 524 1605  | 0.03     | 0.8580165     | 1  | 0.98   | 0.77          | 1.24          | 0.96   | 0.60          | 1.53            |
| NHS2     | 5    | 0.137 0.099 | 65 15 4 280 56 6         | 84 342    | 1.31     | 0.2516796     | 1  | 0.75   | 0.47          | 1.22          | 0.57   | 0.22          | 1.50            |
| PBCS2    | 24   | 0.105 0.107 | 273 68 2 565 143 5       | 343 713   | 0.00     | 0.9776755     | 1  | 1.00   | 0.74          | 1.36          | 1.01   | 0.55          | 1.86            |
| WHS      | 10   | 0.093 0.109 | 79 18 0 430 120 0        | 97 550    | 0.92     | 0.3363342     | 1  | 1.32   | 0.75          | 2.32          | 1.74   | 0.56          | 5.37            |
| PBCS 1+2 | 12   | 0.103 0.113 | 425 104 3 833 222 9      | 532 1064  | 0.47     | 0.4930202     | 1  | 1.09   | 0.85          | 1.39          | 1.19   | 0.73          | 1.95            |

| Locus     | Alleles | Chr         | Location                  | Neighborhood |          |               |    |        |               |               |        |               |                 |
|-----------|---------|-------------|---------------------------|--------------|----------|---------------|----|--------|---------------|---------------|--------|---------------|-----------------|
| rs4666451 | G A     | 2p24.1      |                           | 19150424     |          |               |    |        |               |               |        |               |                 |
| SUBSET    | Rank    | MAF         | Geno Counts               | Subjects     | score X2 | score p-value | df | het OR | het OR 95% CI | het OR 95% CI | hom OR | hom OR 95% CI | hom OR 95% CI_u |
| STAGE1-3  | 23      | 0.387 0.385 | 415 528 164 1621 2044 634 | 1107 4299    | 0.01     | 0.9316755     | 1  | 1.00   | 0.91          | 1.11          | 1.01   | 0.83          | 1.23            |
| STAGE1-2  | 7       | 0.363 0.383 | 236 272 76 1028 1286 396  | 584 2710     | 1.66     | 0.1969309     | 1  | 1.09   | 0.95          | 1.25          | 1.19   | 0.91          | 1.56            |
| STAGE2    | 7       | 0.363 0.383 | 236 272 76 1028 1286 396  | 584 2710     | 1.62     | 0.2025857     | 1  | 1.09   | 0.95          | 1.25          | 1.19   | 0.91          | 1.56            |
| PBCS1     | 19      | 0.384 0.375 | 67 99 23 140 161 52       | 189 353      | 0.01     | 0.9333585     | 1  | 0.99   | 0.76          | 1.29          | 0.98   | 0.58          | 1.66            |
| PLCO      | 8       | 0.338 0.394 | 30 38 6 170 203 75        | 74 448       | 1.14     | 0.2861596     | 1  | 1.22   | 0.85          | 1.76          | 1.49   | 0.72          | 3.09            |
| WHI       | 9       | 0.351 0.378 | 130 123 42 672 822 248    | 295 1742     | 1.44     | 0.2307306     | 1  | 1.12   | 0.93          | 1.34          | 1.25   | 0.87          | 1.81            |
| STAGE3    | 8       | 0.413 0.388 | 179 257 88 593 760 238    | 524 1591     | 1.51     | 0.2189369     | 1  | 0.91   | 0.79          | 1.06          | 0.83   | 0.62          | 1.12            |
| NHS2      | 3       | 0.436 0.370 | 31 35 20 128 165 41       | 86 334       | 2.60     | 0.1069761     | 1  | 0.75   | 0.53          | 1.06          | 0.57   | 0.28          | 1.13            |
| PBCS2     | 15      | 0.411 0.398 | 111 181 50 263 330 118    | 342 711      | 0.19     | 0.6600289     | 1  | 0.96   | 0.79          | 1.16          | 0.92   | 0.63          | 1.34            |
| WHS       | 19      | 0.401 0.387 | 37 41 18 202 265 79       | 96 546       | 0.16     | 0.6928794     | 1  | 0.94   | 0.68          | 1.29          | 0.88   | 0.47          | 1.66            |
| PBCS 1+2  | 16      | 0.401 0.390 | 178 279 73 403 489 170    | 530 1062     | 0.22     | 0.6367663     | 1  | 0.96   | 0.83          | 1.12          | 0.93   | 0.68          | 1.26            |

| Locus     | Alleles | Chr         | Location                  | Neighborhood   |          |               |    |        |               |               |        |               |                 |
|-----------|---------|-------------|---------------------------|----------------|----------|---------------|----|--------|---------------|---------------|--------|---------------|-----------------|
| rs1274466 | T C     | 10p11.21    |                           | 34510210 PARD3 |          |               |    |        |               |               |        |               |                 |
| SUBSET    | Rank    | MAF         | Geno Counts               | Subjects       | score X2 | score p-value | df | het OR | het OR 95% CI | het OR 95% CI | hom OR | hom OR 95% CI | hom OR 95% CI_u |
| STAGE1-3  | 24      | 0.437 0.434 | 399 650 238 1648 2482 973 | 1287 5103      | 0.00     | 0.9553549     | 1  | 1.00   | 0.91          | 1.09          | 0.99   | 0.83          | 1.19            |
| NHS       | 19      | 0.432 0.436 | 55 98 30 261 388 158      | 183 807        | 0.01     | 0.9135183     | 1  | 1.01   | 0.80          | 1.28          | 1.03   | 0.65          | 1.63            |
| STAGE1-2  | 18      | 0.428 0.429 | 239 399 129 1164 1687 665 | 767 3516       | 0.10     | 0.7470288     | 1  | 1.02   | 0.91          | 1.14          | 1.04   | 0.83          | 1.30            |
| STAGE2    | 20      | 0.427 0.427 | 184 301 99 903 1299 507   | 584 2709       | 0.09     | 0.7597864     | 1  | 1.02   | 0.90          | 1.16          | 1.04   | 0.80          | 1.35            |
| PBCS1     | 7       | 0.439 0.457 | 57 98 34 104 174 74       | 189 352        | 0.56     | 0.4522646     | 1  | 1.10   | 0.85          | 1.43          | 1.22   | 0.73          | 2.04            |
| PLCO      | 5       | 0.453 0.391 | 22 37 15 167 212 69       | 74 448         | 2.04     | 0.1532716     | 1  | 0.77   | 0.54          | 1.10          | 0.59   | 0.29          | 1.22            |
| WHI       | 13      | 0.408 0.428 | 99 151 45 579 835 328     | 295 1742       | 0.80     | 0.3699098     | 1  | 1.08   | 0.91          | 1.29          | 1.18   | 0.83          | 1.68            |
| STAGE3    | 20      | 0.450 0.445 | 161 251 109 484 795 309   | 521 1588       | 0.25     | 0.6179835     | 1  | 0.96   | 0.83          | 1.11          | 0.93   | 0.70          | 1.24            |
| NHS2      | 2       | 0.506 0.432 | 19 46 20 106 166 61       | 85 333         | 3.23     | 0.0724916     | 1  | 0.73   | 0.52          | 1.03          | 0.53   | 0.27          | 1.06            |
| PBCS2     | 12      | 0.432 0.451 | 115 156 69 211 357 141    | 340 709        | 0.45     | 0.5043339     | 1  | 1.07   | 0.89          | 1.28          | 1.13   | 0.78          | 1.64            |
| WHS       | 18      | 0.464 0.445 | 27 49 20 167 272 107      | 96 546         | 0.16     | 0.6884462     | 1  | 0.94   | 0.68          | 1.29          | 0.88   | 0.47          | 1.66            |
| PBCS 1+2  | 11      | 0.436 0.452 | 171 254 103 315 531 214   | 528 1060       | 0.89     | 0.3464377     | 1  | 1.07   | 0.92          | 1.25          | 1.16   | 0.86          | 1.56            |

**adj\_rec**

| Locus      | Alleles | Chr         | Location                | Neighborhood |          |               |    |        |               |                 |      |  |
|------------|---------|-------------|-------------------------|--------------|----------|---------------|----|--------|---------------|-----------------|------|--|
| rs12608723 | A G     | 19q13.11    |                         | 38508973     |          |               |    |        |               |                 |      |  |
| SUBSET     | Rank    | MAF         | Geno Counts             | Subjects     | score X2 | score p-value | df | hom OR | hom OR 95% CI | hom OR 95% CI_u |      |  |
| STAGE1-3   | 1       | 0.132 0.121 | 984 274 33 3939 1089 75 | 1291 5103    | 8.36     | 0.0038332     | 1  | 0.54   | 0.35          |                 | 0.82 |  |
| NHS        | 5       | 0.156 0.121 | 127 55 1 624 169 13     | 183 806      | 1.58     | 0.2089969     | 1  | 3.45   | 0.44          | 26.83           |      |  |
| STAGE1-2   | 1       | 0.143 0.122 | 569 176 22 2710 757 49  | 767 3516     | 9.84     | 0.0017097     | 1  | 0.44   | 0.26          | 0.75            |      |  |
| STAGE2     | 1       | 0.140 0.122 | 442 121 21 2086 588 36  | 584 2710     | 17.23    | 3.30E-05      | 1  | 0.32   | 0.18          | 0.56            |      |  |
| PBCS1      | 8       | 0.135 0.110 | 142 43 4 278 72 3       | 189 353      | 1.39     | 0.2377492     | 1  | 0.41   | 0.09          | 1.88            |      |  |
| PLCO       | 1       | 0.162 0.116 | 57 10 7 348 96 4        | 74 448       | 23.15    | 1.50E-06      | 1  | 0.07   | 0.02          | 0.27            |      |  |
| WHI        | 7       | 0.137 0.126 | 222 65 8 1330 386 26    | 295 1742     | 2.40     | 0.1212929     | 1  | 0.53   | 0.24          | 1.20            |      |  |
| STAGE3     | 17      | 0.115 0.122 | 415 99 11 1229 335 26   | 525 1590     | 0.50     | 0.4788938     | 1  | 0.77   | 0.37          | 1.60            |      |  |
| NHS2       | 2       | 0.138 0.118 | 67 16 4 261 69 5        | 87 335       | 3.11     | 0.0780113     | 1  | 0.31   | 0.08          | 1.21            |      |  |
| PBCS2      | 11      | 0.102 0.119 | 276 62 4 554 145 12     | 342 711      | 0.49     | 0.4851965     | 1  | 1.50   | 0.48          | 4.76            |      |  |
| WHS        | 15      | 0.141 0.128 | 72 21 3 414 121 9       | 96 544       | 0.44     | 0.5071847     | 1  | 0.63   | 0.16          | 2.48            |      |  |
| PBCS 1+2   | 22      | 0.113 0.115 | 418 104 8 832 214 15    | 530 1061     | 0.01     | 0.9116779     | 1  | 0.95   | 0.40          | 2.27            |      |  |

| Locus     | Alleles | Chr         | Location                 | Neighborhood |          |               |    |        |               |                 |  |  |
|-----------|---------|-------------|--------------------------|--------------|----------|---------------|----|--------|---------------|-----------------|--|--|
| rs2067980 | A G     | 5p12        |                          | 45018074     |          |               |    |        |               |                 |  |  |
| SUBSET    | Rank    | MAF         | Geno Counts              | Subjects     | score X2 | score p-value | df | hom OR | hom OR 95% CI | hom OR 95% CI_u |  |  |
| STAGE1-3  | 2       | 0.163 0.176 | 902 356 32 3497 1411 190 | 1290 5098    | 6.77     | 0.0092552     | 1  | 1.67   | 1.13          | 2.46            |  |  |
| NHS       | 20      | 0.172 0.179 | 125 53 5 542 240 24      | 183 806      | 0.01     | 0.9285803     | 1  | 1.05   | 0.39          | 2.79            |  |  |

|          |    |             |                         |          |      |           |   |      |      |       |
|----------|----|-------------|-------------------------|----------|------|-----------|---|------|------|-------|
| STAGE1-2 | 6  | 0.170 0.175 | 530 213 24 2412 975 129 | 767 3516 | 1.45 | 0.2278844 | 1 | 1.32 | 0.84 | 2.08  |
| STAGE2   | 4  | 0.170 0.174 | 405 160 19 1870 735 105 | 584 2710 | 1.56 | 0.2121423 | 1 | 1.38 | 0.83 | 2.30  |
| PBCS1    | 13 | 0.251 0.231 | 107 69 13 208 127 18    | 189 353  | 1.00 | 0.3177934 | 1 | 0.68 | 0.32 | 1.45  |
| PLCO     | 8  | 0.122 0.156 | 57 16 1 322 112 14      | 74 448   | 0.86 | 0.3531803 | 1 | 2.56 | 0.33 | 20.04 |
| WHI      | 5  | 0.134 0.170 | 221 69 5 1216 460 66    | 295 1742 | 3.25 | 0.071436  | 1 | 2.28 | 0.91 | 5.72  |
| STAGE3   | 1  | 0.152 0.177 | 372 143 8 1085 437 61   | 523 1583 | 7.22 | 0.0071973 | 1 | 2.72 | 1.28 | 5.78  |
| NHS2     | 23 | 0.149 0.161 | 59 25 0 240 79 14       | 84 333   |      |           |   |      |      |       |
| PBCS2    | 2  | 0.156 0.188 | 243 93 7 467 211 27     | 343 705  | 2.64 | 0.1041034 | 1 | 1.99 | 0.85 | 4.65  |
| WHS      | 6  | 0.141 0.172 | 70 25 1 378 147 20      | 96 545   | 2.05 | 0.1521415 | 1 | 4.00 | 0.52 | 30.74 |
| PBCS 1+2 | 13 | 0.190 0.202 | 350 162 20 675 337 45   | 532 1057 | 0.32 | 0.5688201 | 1 | 1.17 | 0.68 | 2.02  |

Locus Alleles Chr Location Neighborhood  
rs11249433 T|C 1p11.2 120982136 LOC647121

| SUBSET   | Rank | MAF         | Geno Counts               | Subjects  | score X2 | score p-value | df | hom OR | hom OR 95% CI | hom OR 95% CI_u |
|----------|------|-------------|---------------------------|-----------|----------|---------------|----|--------|---------------|-----------------|
| STAGE1-3 | 3    | 0.397 0.441 | 474 598 209 1590 2476 993 | 1281 5059 | 5.32     | 0.0210882     | 1  | 1.22   | 1.03          | 1.44            |
| NHS      | 18   | 0.412 0.448 | 65 84 33 238 411 155      | 182 804   | 0.03     | 0.856611      | 1  | 1.04   | 0.68          | 1.58            |
| STAGE1-2 | 2    | 0.402 0.443 | 270 373 121 1070 1756 674 | 764 3500  | 3.80     | 0.051372      | 1  | 1.24   | 1.00          | 1.53            |
| STAGE2   | 3    | 0.399 0.442 | 205 289 88 832 1345 519   | 582 2696  | 4.15     | 0.0415287     | 1  | 1.30   | 1.01          | 1.67            |
| PBCS1    | 14   | 0.392 0.407 | 67 96 26 124 171 58       | 189 353   | 0.69     | 0.407344      | 1  | 1.24   | 0.75          | 2.06            |
| PLCO     | 16   | 0.411 0.427 | 26 34 13 140 232 75       | 73 447    | 0.09     | 0.7665326     | 1  | 0.90   | 0.47          | 1.76            |
| WHI      | 1    | 0.396 0.455 | 105 145 44 514 857 359    | 294 1730  | 5.50     | 0.0190448     | 1  | 1.50   | 1.07          | 2.12            |
| STAGE3   | 7    | 0.388 0.436 | 204 225 88 520 720 319    | 517 1559  | 1.72     | 0.1891216     | 1  | 1.20   | 0.92          | 1.56            |
| NHS2     | 22   | 0.453 0.446 | 27 40 19 107 147 72       | 86 326    | 0.00     | 0.9965037     | 1  | 1.00   | 0.56          | 1.78            |
| PBCS2    | 7    | 0.372 0.410 | 137 149 51 246 324 121    | 337 691   | 1.03     | 0.3105523     | 1  | 1.21   | 0.84          | 1.73            |
| WHS      | 13   | 0.383 0.462 | 40 36 18 167 249 126      | 94 542    | 0.76     | 0.3845351     | 1  | 1.28   | 0.73          | 2.25            |
| PBCS 1+2 | 6    | 0.379 0.409 | 204 245 77 370 495 179    | 526 1044  | 1.66     | 0.1978274     | 1  | 1.21   | 0.90          | 1.63            |

Locus Alleles Chr Location Neighborhood  
rs9491859 C|A 6q22.33 128106056 C6orf190

| SUBSET   | Rank | MAF         | Geno Counts               | Subjects  | score X2 | score p-value | df | hom OR | hom OR 95% CI | hom OR 95% CI_u |
|----------|------|-------------|---------------------------|-----------|----------|---------------|----|--------|---------------|-----------------|
| STAGE1-3 | 4    | 0.357 0.377 | 525 602 158 2017 2314 764 | 1285 5095 | 5.00     | 0.0254148     | 1  | 1.24   | 1.03          | 1.49            |
| NHS      | 17   | 0.388 0.375 | 67 90 26 325 359 123      | 183 807   | 0.03     | 0.8523212     | 1  | 1.04   | 0.66          | 1.66            |
| STAGE1-2 | 13   | 0.374 0.377 | 301 359 107 1401 1579 536 | 767 3516  | 0.87     | 0.3523042     | 1  | 1.11   | 0.89          | 1.40            |
| STAGE2   | 11   | 0.369 0.378 | 234 269 81 1076 1220 413  | 584 2709  | 0.78     | 0.3762113     | 1  | 1.13   | 0.87          | 1.47            |
| PBCS1    | 18   | 0.354 0.364 | 83 78 28 147 154 51       | 189 352   | 0.02     | 0.8957055     | 1  | 0.97   | 0.58          | 1.61            |
| PLCO     | 12   | 0.378 0.376 | 29 34 11 170 219 59       | 74 448    | 0.31     | 0.578032      | 1  | 0.82   | 0.40          | 1.68            |
| WHI      | 11   | 0.385 0.384 | 110 143 42 682 781 279    | 295 1742  | 0.85     | 0.3577413     | 1  | 1.18   | 0.83          | 1.68            |
| STAGE3   | 2    | 0.333 0.377 | 224 243 51 617 735 228    | 518 1580  | 5.78     | 0.0161709     | 1  | 1.49   | 1.08          | 2.07            |
| NHS2     | 4    | 0.335 0.371 | 35 39 8 139 147 52        | 82 338    | 1.71     | 0.1909625     | 1  | 1.69   | 0.76          | 3.73            |
| PBCS2    | 4    | 0.335 0.365 | 146 160 34 286 322 96     | 340 704   | 2.43     | 0.119018      | 1  | 1.39   | 0.92          | 2.12            |
| WHS      | 3    | 0.323 0.396 | 43 44 9 192 266 80        | 96 538    | 3.15     | 0.0757731     | 1  | 1.96   | 0.92          | 4.17            |
| PBCS 1+2 | 9    | 0.342 0.365 | 229 238 62 432 476 147    | 529 1055  | 1.50     | 0.2212482     | 1  | 1.22   | 0.89          | 1.68            |

Locus Alleles Chr Location Neighborhood  
rs3817198 T|C 11p15.5 1865582 LSP1

| SUBSET   | Rank | MAF         | Geno Counts               | Subjects  | score X2 | score p-value | df | hom OR | hom OR 95% CI | hom OR 95% CI_u |
|----------|------|-------------|---------------------------|-----------|----------|---------------|----|--------|---------------|-----------------|
| STAGE1-3 | 5    | 0.323 0.335 | 582 578 126 2294 2211 606 | 1286 5111 | 4.49     | 0.0341834     | 1  | 1.25   | 1.02          | 1.54            |
| NHS      | 2    | 0.308 0.328 | 82 88 12 373 339 95       | 182 807   | 4.36     | 0.0368691     | 1  | 1.93   | 1.03          | 3.61            |
| STAGE1-2 | 3    | 0.334 0.337 | 329 359 76 1564 1530 419  | 764 3513  | 2.33     | 0.1265112     | 1  | 1.23   | 0.94          | 1.60            |
| STAGE2   | 15   | 0.343 0.340 | 247 271 64 1191 1191 324  | 582 2706  | 0.32     | 0.5708876     | 1  | 1.09   | 0.81          | 1.46            |
| PBCS1    | 15   | 0.321 0.326 | 84 86 17 161 150 39       | 187 350   | 0.45     | 0.5022704     | 1  | 1.23   | 0.67          | 2.26            |
| PLCO     | 17   | 0.365 0.334 | 28 38 8 190 215 42        | 74 447    | 0.09     | 0.7665631     | 1  | 0.88   | 0.39          | 2.01            |
| WHI      | 16   | 0.346 0.343 | 126 134 35 768 753 221    | 295 1742  | 0.29     | 0.5899018     | 1  | 1.11   | 0.76          | 1.63            |
| STAGE3   | 4    | 0.308 0.331 | 252 220 51 727 682 187    | 523 1596  | 2.01     | 0.1565342     | 1  | 1.27   | 0.91          | 1.78            |

|          |    |             |                        |          |      |           |   |      |      |       |
|----------|----|-------------|------------------------|----------|------|-----------|---|------|------|-------|
| NHS2     | 15 | 0.259 0.324 | 50 29 8 160 145 39     | 87 344   | 0.53 | 0.4657791 | 1 | 1.35 | 0.60 | 3.04  |
| PBCS2    | 22 | 0.333 0.330 | 154 148 40 326 301 84  | 342 711  | 0.00 | 0.9742771 | 1 | 1.01 | 0.67 | 1.51  |
| WHS      | 1  | 0.261 0.336 | 48 43 3 24 236 64      | 94 541   | 4.51 | 0.0337788 | 1 | 3.37 | 1.03 | 11.02 |
| PBCS 1+2 | 17 | 0.327 0.327 | 239 233 56 490 450 123 | 528 1063 | 0.21 | 0.643486  | 1 | 1.08 | 0.77 | 1.52  |

Locus Alleles Chr Location Neighborhood  
rs2391406 T|G 13q33.3 106586873

| SUBSET   | Rank | MAF         | Geno Counts               | Subjects  | score X2 | score p-value | df | hom OR | hom OR 95% CI_l | hom OR 95% CI_u |
|----------|------|-------------|---------------------------|-----------|----------|---------------|----|--------|-----------------|-----------------|
| STAGE1-3 | 6    | 0.360 0.367 | 511 627 150 2027 2376 676 | 1288 5079 | 3.85     | 0.0497017     | 1  | 1.21   | 1.00            | 1.47            |
| NHS      | 12   | 0.358 0.366 | 72 91 20 323 377 107      | 183 807   | 0.71     | 0.4005383     | 1  | 1.24   | 0.75            | 2.08            |
| STAGE1-2 | 8    | 0.354 0.364 | 308 373 85 1393 1684 438  | 766 3515  | 1.17     | 0.2797355     | 1  | 1.15   | 0.89            | 1.48            |
| STAGE2   | 13   | 0.353 0.364 | 236 282 65 1070 1307 331  | 583 2708  | 0.52     | 0.4711651     | 1  | 1.11   | 0.83            | 1.49            |
| PBCS1    | 9    | 0.362 0.375 | 78 84 26 125 190 37       | 188 352   | 1.23     | 0.2665717     | 1  | 0.74   | 0.43            | 1.27            |
| PLCO     | 5    | 0.345 0.360 | 29 39 6 180 213 55        | 74 448    | 1.60     | 0.2059461     | 1  | 1.78   | 0.72            | 4.42            |
| WHI      | 10   | 0.344 0.365 | 123 141 31 693 828 221    | 295 1742  | 1.16     | 0.2808239     | 1  | 1.25   | 0.84            | 1.86            |
| STAGE3   | 3    | 0.368 0.373 | 203 253 65 634 693 238    | 521 1565  | 3.25     | 0.0715378     | 1  | 1.32   | 0.98            | 1.78            |
| NHS2     | 7    | 0.359 0.392 | 34 41 10 129 154 56       | 85 339    | 1.11     | 0.291726      | 1  | 1.48   | 0.71            | 3.05            |
| PBCS2    | 6    | 0.382 0.381 | 126 171 45 275 321 108    | 342 704   | 1.19     | 0.2745257     | 1  | 1.24   | 0.85            | 1.80            |
| WHS      | 10   | 0.324 0.351 | 43 41 10 230 218 74       | 94 522    | 0.99     | 0.3192697     | 1  | 1.44   | 0.70            | 2.94            |
| PBCS 1+2 | 19   | 0.375 0.379 | 204 256 71 400 510 145    | 531 1055  | 0.08     | 0.7726134     | 1  | 1.05   | 0.77            | 1.42            |

Locus Alleles Chr Location Neighborhood  
rs7716600 C|A 5p12 44910762

| SUBSET   | Rank | MAF         | Geno Counts              | Subjects  | score X2 | score p-value | df | hom OR | hom OR 95% CI_l | hom OR 95% CI_u |
|----------|------|-------------|--------------------------|-----------|----------|---------------|----|--------|-----------------|-----------------|
| STAGE1-3 | 7    | 0.220 0.243 | 787 439 65 2950 1835 322 | 1291 5107 | 3.00     | 0.0833302     | 1  | 1.28   | 0.97            | 1.70            |
| NHS      | 13   | 0.246 0.253 | 108 60 15 451 303 53     | 183 807   | 0.61     | 0.4349386     | 1  | 0.79   | 0.43            | 1.44            |
| STAGE1-2 | 4    | 0.225 0.248 | 465 259 43 2015 1256 243 | 767 3514  | 2.21     | 0.1375278     | 1  | 1.29   | 0.92            | 1.82            |
| STAGE2   | 2    | 0.218 0.246 | 357 199 28 1564 953 190  | 584 2707  | 4.57     | 0.0325657     | 1  | 1.57   | 1.04            | 2.38            |
| PBCS1    | 19   | 0.272 0.272 | 99 77 13 186 139 26      | 189 351   | 0.01     | 0.9107626     | 1  | 1.04   | 0.52            | 2.10            |
| PLCO     | 15   | 0.169 0.232 | 52 19 3 261 166 21       | 74 448    | 0.18     | 0.6675149     | 1  | 1.31   | 0.38            | 4.60            |
| WHI      | 2    | 0.200 0.248 | 188 96 11 1010 600 131   | 295 1741  | 5.38     | 0.0203231     | 1  | 2.08   | 1.11            | 3.89            |
| STAGE3   | 16   | 0.214 0.231 | 322 180 22 936 581 78    | 524 1595  | 0.54     | 0.4632656     | 1  | 1.20   | 0.73            | 1.97            |
| NHS2     | 9    | 0.267 0.230 | 46 34 6 198 126 15       | 86 339    | 0.96     | 0.3273122     | 1  | 0.61   | 0.22            | 1.66            |
| PBCS2    | 3    | 0.195 0.233 | 219 111 11 417 254 38    | 341 709   | 2.47     | 0.1161168     | 1  | 1.73   | 0.87            | 3.44            |
| WHS      | 20   | 0.232 0.229 | 57 35 5 321 201 25       | 97 547    | 0.07     | 0.7906532     | 1  | 0.87   | 0.32            | 2.38            |
| PBCS 1+2 | 2    | 0.223 0.246 | 318 188 24 602 391 65    | 530 1058  | 2.04     | 0.1534229     | 1  | 1.42   | 0.88            | 2.31            |

Locus Alleles Chr Location Neighborhood  
rs17740709 A|G 12q21.31 81947471 TMTC2

| SUBSET   | Rank | MAF         | Geno Counts              | Subjects  | score X2 | score p-value | df | hom OR | hom OR 95% CI_l | hom OR 95% CI_u |
|----------|------|-------------|--------------------------|-----------|----------|---------------|----|--------|-----------------|-----------------|
| STAGE1-3 | 8    | 0.210 0.220 | 811 412 65 3142 1658 292 | 1288 5092 | 1.98     | 0.1595603     | 1  | 1.22   | 0.92            | 1.63            |
| NHS      | 1    | 0.180 0.222 | 121 58 4 502 251 54      | 183 807   | 5.40     | 0.0201591     | 1  | 3.20   | 1.14            | 8.99            |
| STAGE1-2 | 15   | 0.213 0.217 | 481 246 40 2194 1121 202 | 767 3517  | 0.80     | 0.3698875     | 1  | 1.18   | 0.82            | 1.68            |
| STAGE2   | 17   | 0.223 0.215 | 360 188 36 1692 870 148  | 584 2710  | 0.10     | 0.7484048     | 1  | 0.94   | 0.64            | 1.38            |
| PBCS1    | 21   | 0.254 0.245 | 106 70 13 203 127 23     | 189 353   | 0.00     | 0.9570011     | 1  | 1.02   | 0.50            | 2.09            |
| PLCO     | 18   | 0.209 0.218 | 48 21 5 277 147 24       | 74 448    | 0.08     | 0.7731585     | 1  | 0.86   | 0.31            | 2.41            |
| WHI      | 19   | 0.212 0.210 | 187 91 17 1105 544 93    | 295 1742  | 0.09     | 0.7691037     | 1  | 0.92   | 0.54            | 1.58            |
| STAGE3   | 8    | 0.207 0.228 | 330 166 25 948 539 90    | 521 1577  | 1.45     | 0.2286439     | 1  | 1.33   | 0.84            | 2.12            |
| NHS2     | 18   | 0.204 0.212 | 53 23 5 207 109 16       | 81 332    | 0.15     | 0.6971919     | 1  | 0.81   | 0.28            | 2.32            |
| PBCS2    | 5    | 0.212 0.254 | 215 109 18 398 260 50    | 342 708   | 1.28     | 0.2580943     | 1  | 1.38   | 0.79            | 2.41            |
| WHS      | 11   | 0.194 0.203 | 62 34 2 343 170 24       | 98 537    | 0.98     | 0.3221811     | 1  | 2.07   | 0.48            | 8.95            |
| PBCS 1+2 | 12   | 0.227 0.251 | 321 179 31 601 385 73    | 531 1059  | 0.79     | 0.3733988     | 1  | 1.22   | 0.79            | 1.89            |

Locus Alleles Chr Location Neighborhood



| rs7936636 | C T  | 11p11.2     | 44397546                 |           |          |               |    |        |                 |                 |  |
|-----------|------|-------------|--------------------------|-----------|----------|---------------|----|--------|-----------------|-----------------|--|
| SUBSET    | Rank | MAF         | Geno Counts              | Subjects  | score X2 | score p-value | df | hom OR | hom OR 95% CI_l | hom OR 95% CI_u |  |
| STAGE1-3  | 9    | 0.234 0.250 | 759 457 74 2885 1879 337 | 1290 5101 | 1.66     | 0.1979259     | 1  | 1.19   | 0.91            | 1.55            |  |
| NHS       | 3    | 0.219 0.247 | 110 66 7 470 276 61      | 183 807   | 3.28     | 0.0700853     | 1  | 2.07   | 0.93            | 4.62            |  |
| STAGE1-2  | 10   | 0.226 0.247 | 465 258 44 2020 1258 238 | 767 3516  | 1.08     | 0.2979377     | 1  | 1.20   | 0.85            | 1.68            |  |
| STAGE2    | 21   | 0.228 0.247 | 355 192 37 1550 982 177  | 584 2709  | 0.02     | 0.9003877     | 1  | 1.02   | 0.70            | 1.49            |  |
| PBCS1     | 20   | 0.228 0.229 | 115 62 12 212 119 21     | 189 352   | 0.01     | 0.9254991     | 1  | 0.97   | 0.46            | 2.02            |  |
| PLCO      | 9    | 0.243 0.253 | 45 22 7 254 161 33       | 74 448    | 0.80     | 0.372139      | 1  | 0.67   | 0.28            | 1.62            |  |
| WHI       | 12   | 0.219 0.249 | 181 99 15 983 649 110    | 295 1742  | 0.73     | 0.3941471     | 1  | 1.27   | 0.73            | 2.22            |  |
| STAGE3    | 19   | 0.248 0.258 | 294 199 30 865 621 98    | 523 1584  | 0.42     | 0.5185179     | 1  | 1.15   | 0.75            | 1.77            |  |
| NHS2      | 16   | 0.244 0.239 | 47 33 4 198 117 22       | 84 337    | 0.47     | 0.4920307     | 1  | 1.47   | 0.49            | 4.44            |  |
| PBCS2     | 14   | 0.265 0.268 | 185 133 24 372 282 47    | 342 701   | 0.10     | 0.7500824     | 1  | 0.92   | 0.55            | 1.54            |  |
| WHS       | 5    | 0.191 0.256 | 62 33 2 295 222 29       | 97 546    | 2.18     | 0.1399485     | 1  | 2.91   | 0.66            | 12.77           |  |
| PBCS 1+2  | 20   | 0.251 0.256 | 300 195 36 584 401 69    | 531 1054  | 0.04     | 0.8361451     | 1  | 0.96   | 0.63            | 1.46            |  |

Locus Alleles Chr Location Neighborhood  
rs7121523 G|A 11p15.4 7556781 PPFIBP2

| SUBSET   | Rank | MAF         | Geno Counts              | Subjects  | score X2 | score p-value | df | hom OR | hom OR 95% CI_l | hom OR 95% CI_u |
|----------|------|-------------|--------------------------|-----------|----------|---------------|----|--------|-----------------|-----------------|
| STAGE1-3 | 10   | 0.162 0.160 | 908 352 33 3629 1305 166 | 1293 5100 | 1.37     | 0.2426712     | 1  | 1.26   | 0.86            | 1.85            |
| NHS      | 11   | 0.164 0.168 | 129 48 6 572 199 36      | 183 807   | 0.75     | 0.3853805     | 1  | 1.48   | 0.61            | 3.59            |
| STAGE1-2 | 14   | 0.175 0.161 | 522 222 23 2508 881 126  | 767 3515  | 0.86     | 0.3549183     | 1  | 1.24   | 0.78            | 1.97            |
| STAGE2   | 16   | 0.178 0.159 | 393 174 17 1936 682 90   | 584 2708  | 0.32     | 0.5711831     | 1  | 1.17   | 0.68            | 2.00            |
| PBCS1    | 1    | 0.148 0.156 | 134 54 1 259 76 17       | 189 352   | 7.31     | 0.0068668     | 1  | 9.94   | 1.30            | 75.76           |
| PLCO     | 11   | 0.230 0.160 | 41 32 1 318 117 13       | 74 448    | 0.56     | 0.4542001     | 1  | 2.16   | 0.27            | 17.07           |
| WHI      | 4    | 0.186 0.157 | 200 80 15 1244 446 51    | 295 1741  | 4.21     | 0.0402273     | 1  | 0.54   | 0.30            | 0.98            |
| STAGE3   | 18   | 0.143 0.159 | 386 130 10 1121 424 40   | 526 1585  | 0.48     | 0.4901404     | 1  | 1.28   | 0.63            | 2.62            |
| NHS2     | 20   | 0.161 0.151 | 61 24 2 246 82 10        | 87 338    | 0.08     | 0.7798113     | 1  | 1.25   | 0.27            | 5.84            |
| PBCS2    | 10   | 0.136 0.158 | 254 81 6 496 184 18      | 341 698   | 0.60     | 0.4390151     | 1  | 1.44   | 0.57            | 3.69            |
| WHS      | 23   | 0.148 0.166 | 71 25 2 379 158 12       | 98 549    | 0.01     | 0.9407108     | 1  | 1.06   | 0.22            | 5.07            |
| PBCS 1+2 | 1    | 0.141 0.157 | 388 135 7 755 260 35     | 530 1050  | 5.50     | 0.0189729     | 1  | 2.59   | 1.14            | 5.88            |

Locus Alleles Chr Location Neighborhood  
rs37936 A|G 7q21.11 79806994

| SUBSET   | Rank | MAF         | Geno Counts               | Subjects  | score X2 | score p-value | df | hom OR | hom OR 95% CI_l | hom OR 95% CI_u |
|----------|------|-------------|---------------------------|-----------|----------|---------------|----|--------|-----------------|-----------------|
| STAGE1-3 | 11   | 0.370 0.367 | 513 560 186 2015 2294 686 | 1259 4995 | 1.33     | 0.2486866     | 1  | 0.90   | 0.75            | 1.08            |
| NHS      | 9    | 0.369 0.362 | 77 68 31 333 343 115      | 176 791   | 1.01     | 0.3138412     | 1  | 0.80   | 0.51            | 1.24            |
| STAGE1-2 | 7    | 0.376 0.362 | 227 246 88 1268 1397 418  | 561 3083  | 1.45     | 0.2292476     | 1  | 0.86   | 0.67            | 1.10            |
| STAGE2   | 12   | 0.379 0.362 | 150 178 57 935 1054 303   | 385 2292  | 0.59     | 0.4435493     | 1  | 0.89   | 0.65            | 1.21            |
| PLCO     | 21   | 0.396 0.372 | 26 35 11 181 186 69       | 72 436    | 0.00     | 0.9757015     | 1  | 1.01   | 0.50            | 2.05            |
| WHI      | 8    | 0.387 0.362 | 111 131 46 680 800 212    | 288 1692  | 2.33     | 0.1269598     | 1  | 0.76   | 0.54            | 1.08            |
| STAGE3   | 6    | 0.382 0.374 | 203 238 80 618 750 218    | 521 1586  | 1.82     | 0.1778198     | 1  | 0.82   | 0.62            | 1.09            |
| NHS2     | 5    | 0.419 0.404 | 32 36 18 122 166 56       | 86 344    | 1.41     | 0.2344327     | 1  | 0.70   | 0.38            | 1.27            |
| PBCS2    | 17   | 0.362 0.360 | 134 163 41 283 324 88     | 338 695   | 0.06     | 0.8127539     | 1  | 1.05   | 0.70            | 1.56            |
| WHS      | 2    | 0.418 0.373 | 37 39 21 213 260 74       | 97 547    | 3.69     | 0.0547616     | 1  | 0.58   | 0.33            | 1.02            |
| PBCS 1+2 | 10   | 0.347 0.366 | 217 239 59 412 471 138    | 515 1021  | 1.18     | 0.2765983     | 1  | 1.20   | 0.86            | 1.67            |

Locus Alleles Chr Location Neighborhood  
rs11077820 T|C 17q25.1 71966263 UBE2O,AANAT

| SUBSET   | Rank | MAF         | Geno Counts               | Subjects  | score X2 | score p-value | df | hom OR | hom OR 95% CI_l | hom OR 95% CI_u |
|----------|------|-------------|---------------------------|-----------|----------|---------------|----|--------|-----------------|-----------------|
| STAGE1-3 | 12   | 0.360 0.367 | 533 588 171 2093 2255 738 | 1292 5086 | 1.31     | 0.2521908     | 1  | 1.11   | 0.93            | 1.34            |
| NHS      | 19   | 0.374 0.374 | 73 83 27 329 353 125      | 183 807   | 0.02     | 0.8842024     | 1  | 1.03   | 0.66            | 1.63            |
| STAGE1-2 | 9    | 0.362 0.368 | 311 356 100 1447 1549 517 | 767 3513  | 1.15     | 0.2837134     | 1  | 1.14   | 0.90            | 1.44            |
| STAGE2   | 6    | 0.359 0.366 | 238 273 73 1118 1196 392  | 584 2706  | 1.31     | 0.2530927     | 1  | 1.17   | 0.89            | 1.55            |

|          |    |             |                        |          |      |           |   |      |      |      |
|----------|----|-------------|------------------------|----------|------|-----------|---|------|------|------|
| PBCS1    | 11 | 0.381 0.334 | 74 86 29 160 150 43    | 189 353  | 1.05 | 0.3059608 | 1 | 0.76 | 0.46 | 1.28 |
| PLCO     | 20 | 0.358 0.354 | 30 35 9 188 200 58     | 74 446   | 0.01 | 0.9030179 | 1 | 1.05 | 0.49 | 2.26 |
| WHI      | 3  | 0.342 0.378 | 124 140 31 694 776 270 | 295 1740 | 4.90 | 0.0267831 | 1 | 1.56 | 1.05 | 2.32 |
| STAGE3   | 20 | 0.356 0.365 | 222 232 71 646 707 221 | 525 1574 | 0.25 | 0.6189095 | 1 | 1.08 | 0.80 | 1.45 |
| NHS2     | 19 | 0.341 0.373 | 41 30 14 133 153 48    | 85 334   | 0.09 | 0.7588142 | 1 | 0.90 | 0.47 | 1.74 |
| PBCS2    | 21 | 0.366 0.382 | 141 153 49 269 335 102 | 343 706  | 0.01 | 0.9247759 | 1 | 1.02 | 0.70 | 1.48 |
| WHS      | 8  | 0.335 0.338 | 40 49 8 244 219 71     | 97 534   | 1.56 | 0.2109485 | 1 | 1.63 | 0.75 | 3.54 |
| PBCS 1+2 | 14 | 0.371 0.366 | 215 239 78 429 484 145 | 532 1058 | 0.29 | 0.5892427 | 1 | 0.92 | 0.68 | 1.24 |

Locus Alleles Chr Location Neighborhood  
rs10850145 C|T 12q24.13 112428512

| SUBSET   | Rank | MAF         | Geno Counts              | Subjects  | score X2 | score p-value | df | hom OR | hom OR 95% CI_l | hom OR 95% CI_u |
|----------|------|-------------|--------------------------|-----------|----------|---------------|----|--------|-----------------|-----------------|
| STAGE1-3 | 13   | 0.108 0.109 | 1029 245 17 4054 1012 52 | 1291 5118 | 1.29     | 0.2562103     | 1  | 0.72   | 0.41            | 1.27            |
| NHS      | 4    | 0.117 0.108 | 145 33 5 642 155 10      | 183 807   | 2.29     | 0.1300948     | 1  | 0.44   | 0.15            | 1.31            |
| STAGE1-2 | 16   | 0.108 0.110 | 612 144 11 2781 693 41   | 767 3515  | 0.56     | 0.4523532     | 1  | 0.77   | 0.39            | 1.53            |
| STAGE2   | 20   | 0.105 0.111 | 467 111 6 2139 538 31    | 584 2708  | 0.02     | 0.8944562     | 1  | 1.06   | 0.43            | 2.61            |
| PBCS1    | 16   | 0.101 0.123 | 152 36 1 270 79 4        | 189 353   | 0.44     | 0.5057061     | 1  | 2.08   | 0.23            | 19.00           |
| PLCO     | 22   | 0.122 0.106 | 56 18 0 357 87 4         | 74 448    |          |               |    |        |                 |                 |
| WHI      | 21   | 0.107 0.110 | 236 55 4 1378 341 21     | 295 1740  | 0.04     | 0.8478427     | 1  | 0.90   | 0.30            | 2.66            |
| STAGE3   | 10   | 0.108 0.106 | 417 101 6 1275 319 11    | 524 1605  | 0.78     | 0.3769442     | 1  | 0.63   | 0.23            | 1.76            |
| NHS2     | 3    | 0.137 0.099 | 65 15 4 280 56 6         | 84 342    | 2.57     | 0.1087346     | 1  | 0.35   | 0.09            | 1.32            |
| PBCS2    | 19   | 0.105 0.107 | 273 68 2 565 143 5       | 343 713   | 0.04     | 0.8496769     | 1  | 1.17   | 0.22            | 6.14            |
| WHS      | 24   | 0.093 0.109 | 79 18 0 430 120 0        | 97 550    | -        |               | 1  | 1.00   | 1.00            | 1.00            |
| PBCS 1+2 | 15   | 0.103 0.113 | 425 104 3 833 222 9      | 532 1064  | 0.29     | 0.5925266     | 1  | 1.43   | 0.38            | 5.32            |

Locus Alleles Chr Location Neighborhood  
rs4415084 C|T 5p12 44698272

| SUBSET   | Rank | MAF         | Geno Counts               | Subjects  | score X2 | score p-value | df | hom OR | hom OR 95% CI_l | hom OR 95% CI_u |
|----------|------|-------------|---------------------------|-----------|----------|---------------|----|--------|-----------------|-----------------|
| STAGE1-3 | 14   | 0.422 0.431 | 434 623 232 1673 2433 970 | 1289 5076 | 1.19     | 0.2745673     | 1  | 1.09   | 0.93            | 1.29            |
| NHS      | 6    | 0.448 0.437 | 57 87 38 240 421 139      | 182 800   | 1.49     | 0.2220701     | 1  | 0.78   | 0.52            | 1.17            |
| STAGE1-2 | 19   | 0.422 0.429 | 264 358 144 1154 1698 657 | 766 3509  | 0.07     | 0.7930976     | 1  | 1.03   | 0.84            | 1.26            |
| STAGE2   | 8    | 0.414 0.427 | 207 271 106 914 1277 518  | 584 2709  | 0.90     | 0.3439233     | 1  | 1.12   | 0.88            | 1.42            |
| PBCS1    | 6    | 0.476 0.463 | 55 88 46 97 185 71        | 189 353   | 1.70     | 0.1928641     | 1  | 0.75   | 0.49            | 1.16            |
| PLCO     | 2    | 0.338 0.407 | 28 42 4 163 205 80        | 74 448    | 7.32     | 0.0068164     | 1  | 3.85   | 1.36            | 10.93           |
| WHI      | 14   | 0.402 0.429 | 111 131 53 588 813 340    | 295 1741  | 0.57     | 0.4502334     | 1  | 1.13   | 0.82            | 1.56            |
| STAGE3   | 5    | 0.422 0.435 | 171 265 89 520 739 315    | 525 1574  | 1.90     | 0.1683267     | 1  | 1.20   | 0.92            | 1.57            |
| NHS2     | 12   | 0.403 0.449 | 31 43 14 105 156 71       | 88 332    | 0.80     | 0.3709115     | 1  | 1.34   | 0.71            | 2.52            |
| PBCS2    | 9    | 0.413 0.440 | 117 165 58 226 346 140    | 340 712   | 0.83     | 0.3611317     | 1  | 1.17   | 0.83            | 1.65            |
| WHS      | 18   | 0.469 0.420 | 23 57 17 189 237 104      | 97 530    | 0.24     | 0.6239776     | 1  | 1.16   | 0.65            | 2.07            |
| PBCS 1+2 | 23   | 0.435 0.447 | 171 253 103 322 527 209   | 527 1058  | 0.00     | 0.9646323     | 1  | 1.01   | 0.77            | 1.31            |

Locus Alleles Chr Location Neighborhood  
rs10941679 A|G 5p12 44742255

| SUBSET   | Rank | MAF         | Geno Counts            | Subjects | score X2 | score p-value | df | hom OR | hom OR 95% CI_l | hom OR 95% CI_u |
|----------|------|-------------|------------------------|----------|----------|---------------|----|--------|-----------------|-----------------|
| STAGE1-3 | 15   | 0.264 0.282 | 378 275 47 978 787 146 | 700 1911 | 0.83     | 0.3625222     | 1  | 1.17   | 0.83            | 1.67            |
| STAGE3   | 9    | 0.247 0.278 | 293 197 30 817 646 116 | 520 1579 | 1.23     | 0.267151      | 1  | 1.27   | 0.83            | 1.94            |
| NHS2     | 17   | 0.268 0.285 | 46 28 8 173 133 29     | 82 335   | 0.16     | 0.6909255     | 1  | 0.84   | 0.36            | 1.95            |
| PBCS2    | 1    | 0.235 0.288 | 196 130 15 350 308 50  | 341 708  | 2.81     | 0.0933917     | 1  | 1.66   | 0.91            | 3.01            |
| WHS      | 22   | 0.273 0.260 | 51 39 7 294 205 37     | 97 536   | 0.02     | 0.8863887     | 1  | 0.94   | 0.40            | 2.22            |
| PBCS 1+2 | 8    | 0.261 0.293 | 281 208 32 511 449 80  | 521 1040 | 1.55     | 0.2138418     | 1  | 1.31   | 0.85            | 2.02            |

Locus Alleles Chr Location Neighborhood  
rs1274466 T|C 10p11.21 34510210 PARD3

| SUBSET   | Rank | MAF         | Geno Counts               | Subjects  | score X2 | score p-value | df | hom OR | hom OR 95% CI_l | hom OR 95% CI_u |
|----------|------|-------------|---------------------------|-----------|----------|---------------|----|--------|-----------------|-----------------|
| STAGE1-3 | 16   | 0.437 0.434 | 399 650 238 1648 2482 973 | 1287 5103 | 0.43     | 0.5137711     | 1  | 1.06   | 0.90            | 1.24            |
| NHS      | 10   | 0.432 0.436 | 55 98 30 261 388 158      | 183 807   | 0.86     | 0.3543187     | 1  | 1.23   | 0.80            | 1.89            |
| STAGE1-2 | 5    | 0.428 0.429 | 239 399 129 1164 1687 665 | 767 3516  | 2.16     | 0.1416459     | 1  | 1.17   | 0.95            | 1.45            |
| STAGE2   | 5    | 0.427 0.427 | 184 301 99 903 1299 507   | 584 2709  | 1.38     | 0.2405603     | 1  | 1.16   | 0.91            | 1.47            |
| PBCS1    | 12   | 0.439 0.457 | 57 98 34 104 174 74       | 189 352   | 1.01     | 0.315727      | 1  | 1.26   | 0.80            | 2.00            |
| PLCO     | 6    | 0.453 0.391 | 22 37 15 167 212 69       | 74 448    | 0.93     | 0.3345432     | 1  | 0.73   | 0.38            | 1.39            |
| WHI      | 9    | 0.408 0.428 | 99 151 45 579 835 328     | 295 1742  | 2.16     | 0.1419654     | 1  | 1.29   | 0.92            | 1.81            |
| STAGE3   | 15   | 0.450 0.445 | 161 251 109 484 795 309   | 521 1588  | 0.59     | 0.440507      | 1  | 0.91   | 0.70            | 1.16            |
| NHS2     | 8    | 0.506 0.432 | 19 46 20 106 166 61       | 85 333    | 1.01     | 0.3137457     | 1  | 0.74   | 0.42            | 1.33            |
| PBCS2    | 15   | 0.432 0.451 | 115 156 69 211 357 141    | 340 709   | 0.07     | 0.7856677     | 1  | 0.96   | 0.69            | 1.32            |
| WHS      | 21   | 0.464 0.445 | 27 49 20 167 272 107      | 96 546    | 0.02     | 0.8764274     | 1  | 0.96   | 0.55            | 1.66            |
| PBCS 1+2 | 18   | 0.436 0.452 | 171 254 103 315 531 214   | 528 1060  | 0.12     | 0.7282179     | 1  | 1.05   | 0.80            | 1.37            |

Locus Alleles Chr Location Neighborhood  
rs998592 G|A 16p13.13 11107179 CLEC16A

| SUBSET   | Rank | MAF         | Geno Counts               | Subjects  | score X2 | score p-value | df | hom OR | hom OR 95% CI_l | hom OR 95% CI_u |
|----------|------|-------------|---------------------------|-----------|----------|---------------|----|--------|-----------------|-----------------|
| STAGE1-3 | 17   | 0.404 0.417 | 446 647 199 1696 2557 852 | 1292 5105 | 0.42     | 0.5188407     | 1  | 1.06   | 0.89            | 1.26            |
| NHS      | 16   | 0.434 0.429 | 54 99 30 253 415 139      | 183 807   | 0.08     | 0.7716755     | 1  | 1.07   | 0.69            | 1.65            |
| STAGE1-2 | 12   | 0.403 0.424 | 264 388 115 1133 1787 597 | 767 3517  | 0.90     | 0.3436899     | 1  | 1.11   | 0.89            | 1.39            |
| STAGE2   | 9    | 0.393 0.422 | 210 289 85 880 1372 458   | 584 2710  | 0.88     | 0.3478707     | 1  | 1.13   | 0.87            | 1.46            |
| PBCS1    | 17   | 0.368 0.368 | 74 91 24 141 164 48       | 189 353   | 0.05     | 0.8239935     | 1  | 1.06   | 0.62            | 1.81            |
| PLCO     | 10   | 0.426 0.393 | 25 35 14 162 220 66       | 74 448    | 0.70     | 0.4014179     | 1  | 0.76   | 0.39            | 1.45            |
| WHI      | 6    | 0.403 0.444 | 100 152 43 517 903 322    | 295 1742  | 2.47     | 0.1160388     | 1  | 1.32   | 0.93            | 1.87            |
| STAGE3   | 24   | 0.407 0.403 | 182 260 84 563 771 255    | 526 1589  | 0.01     | 0.9187782     | 1  | 0.99   | 0.75            | 1.30            |
| NHS2     | 10   | 0.482 0.425 | 22 43 19 115 159 64       | 84 338    | 0.91     | 0.3393355     | 1  | 0.75   | 0.42            | 1.35            |
| PBCS2    | 18   | 0.397 0.386 | 122 171 51 266 333 105    | 344 704   | 0.05     | 0.8305268     | 1  | 1.04   | 0.72            | 1.50            |
| WHS      | 19   | 0.378 0.412 | 38 46 14 182 279 86       | 98 547    | 0.16     | 0.6861719     | 1  | 1.14   | 0.61            | 2.13            |
| PBCS 1+2 | 21   | 0.386 0.380 | 196 261 75 407 496 153    | 532 1056  | 0.03     | 0.8608301     | 1  | 1.03   | 0.76            | 1.39            |

Locus Alleles Chr Location Neighborhood  
rs1334615 G|T 1p34.2 40134653 TRIT1,MYCL1

| SUBSET   | Rank | MAF         | Geno Counts              | Subjects  | score X2 | score p-value | df | hom OR | hom OR 95% CI_l | hom OR 95% CI_u |
|----------|------|-------------|--------------------------|-----------|----------|---------------|----|--------|-----------------|-----------------|
| STAGE1-3 | 18   | 0.250 0.243 | 722 489 77 2906 1906 288 | 1288 5100 | 0.34     | 0.5573909     | 1  | 0.92   | 0.71            | 1.21            |
| NHS      | 14   | 0.260 0.262 | 101 69 13 433 325 49     | 183 807   | 0.38     | 0.5361948     | 1  | 0.82   | 0.43            | 1.55            |
| STAGE1-2 | 22   | 0.256 0.248 | 420 302 45 1984 1323 210 | 767 3517  | 0.00     | 0.9619116     | 1  | 0.99   | 0.71            | 1.39            |
| STAGE2   | 18   | 0.254 0.244 | 319 233 32 1551 998 161  | 584 2710  | 0.09     | 0.7579666     | 1  | 1.06   | 0.71            | 1.59            |
| PBCS1    | 4    | 0.235 0.231 | 106 77 6 213 117 23      | 189 353   | 3.33     | 0.0678324     | 1  | 2.32   | 0.92            | 5.83            |
| PLCO     | 13   | 0.264 0.253 | 38 33 3 247 175 26       | 74 448    | 0.27     | 0.6038905     | 1  | 1.39   | 0.40            | 4.81            |
| WHI      | 13   | 0.264 0.247 | 160 114 21 985 654 103   | 295 1742  | 0.69     | 0.4051869     | 1  | 0.81   | 0.50            | 1.32            |
| STAGE3   | 12   | 0.241 0.234 | 302 188 32 922 585 79    | 522 1586  | 0.70     | 0.402023      | 1  | 0.83   | 0.54            | 1.28            |
| NHS2     | 6    | 0.229 0.241 | 52 24 7 190 124 18       | 83 332    | 1.27     | 0.2593375     | 1  | 0.59   | 0.24            | 1.48            |
| PBCS2    | 12   | 0.230 0.225 | 202 124 17 427 240 39    | 343 706   | 0.26     | 0.6104978     | 1  | 1.17   | 0.64            | 2.11            |
| WHS      | 4    | 0.292 0.242 | 48 40 8 305 221 22       | 96 548    | 2.52     | 0.1121807     | 1  | 0.50   | 0.21            | 1.19            |
| PBCS 1+2 | 3    | 0.232 0.226 | 308 200 23 640 355 61    | 531 1056  | 1.89     | 0.1688637     | 1  | 1.41   | 0.86            | 2.32            |

Locus Alleles Chr Location Neighborhood  
rs999737 C|T 14q24.1 68104435 RAD51L1

| SUBSET   | Rank | MAF         | Geno Counts              | Subjects  | score X2 | score p-value | df | hom OR | hom OR 95% CI_l | hom OR 95% CI_u |
|----------|------|-------------|--------------------------|-----------|----------|---------------|----|--------|-----------------|-----------------|
| STAGE1-3 | 19   | 0.228 0.215 | 760 466 61 3130 1743 227 | 1287 5100 | 0.22     | 0.6410517     | 1  | 0.93   | 0.69            | 1.25            |
| NHS      | 7    | 0.239 0.209 | 105 67 10 499 278 30     | 182 807   | 1.35     | 0.2451365     | 1  | 0.65   | 0.31            | 1.36            |
| STAGE1-2 | 17   | 0.224 0.211 | 459 271 36 2185 1182 150 | 766 3517  | 0.49     | 0.4817834     | 1  | 0.87   | 0.60            | 1.28            |
| STAGE2   | 19   | 0.219 0.211 | 354 204 26 1686 904 120  | 584 2710  | 0.04     | 0.8345901     | 1  | 0.95   | 0.61            | 1.49            |
| PBCS1    | 2    | 0.228 0.203 | 115 62 12 219 125 9      | 189 353   | 5.14     | 0.0234322     | 1  | 0.37   | 0.15            | 0.90            |

|          |    |             |                        |          |      |           |   |      |      |      |
|----------|----|-------------|------------------------|----------|------|-----------|---|------|------|------|
| PLCO     | 14 | 0.189 0.225 | 48 24 2 262 170 16     | 74 448   | 0.19 | 0.6605989 | 1 | 1.40 | 0.31 | 6.34 |
| WHI      | 15 | 0.224 0.208 | 174 110 11 1100 559 83 | 295 1742 | 0.54 | 0.4620971 | 1 | 1.27 | 0.67 | 2.43 |
| STAGE3   | 23 | 0.235 0.226 | 302 195 25 946 562 77  | 522 1585 | 0.03 | 0.865742  | 1 | 1.04 | 0.65 | 1.68 |
| NHS2     | 11 | 0.212 0.233 | 52 30 3 198 115 20     | 85 333   | 0.85 | 0.355933  | 1 | 1.78 | 0.51 | 6.18 |
| PBCS2    | 23 | 0.234 0.224 | 198 125 17 422 248 34  | 340 704  | 0.00 | 0.9957715 | 1 | 1.00 | 0.55 | 1.83 |
| WHS      | 16 | 0.258 0.224 | 52 40 5 326 199 23     | 97 548   | 0.30 | 0.5859298 | 1 | 0.75 | 0.27 | 2.08 |
| PBCS 1+2 | 7  | 0.232 0.217 | 312 187 29 640 372 43  | 528 1055 | 1.63 | 0.2014993 | 1 | 0.73 | 0.45 | 1.19 |

Locus Alleles Chr Location Neighborhood  
rs12622050 G|A 2q11.2 100945886 NPAS2

| SUBSET   | Rank | MAF         | Geno Counts              | Subjects  | score X2 | score p-value | df | hom OR | hom OR 95% CI | hom OR 95% CI_u |
|----------|------|-------------|--------------------------|-----------|----------|---------------|----|--------|---------------|-----------------|
| STAGE1-3 | 20   | 0.225 0.209 | 779 439 70 3197 1647 236 | 1288 5080 | 0.19     | 0.6610591     | 1  | 0.94   | 0.71          | 1.25            |
| NHS      | 8    | 0.191 0.189 | 122 52 9 529 251 27      | 183 807   | 1.24     | 0.2653197     | 1  | 0.65   | 0.30          | 1.40            |
| STAGE1-2 | 20   | 0.202 0.200 | 492 240 35 2262 1101 152 | 767 3515  | 0.01     | 0.9247227     | 1  | 1.02   | 0.69          | 1.50            |
| STAGE2   | 14   | 0.205 0.203 | 370 188 26 1733 850 125  | 584 2708  | 0.40     | 0.5256888     | 1  | 1.15   | 0.74          | 1.80            |
| PBCS1    | 5    | 0.222 0.249 | 114 66 9 204 121 27      | 189 352   | 1.77     | 0.1830836     | 1  | 1.69   | 0.77          | 3.71            |
| PLCO     | 19   | 0.203 0.195 | 47 24 3 288 145 15       | 74 448    | 0.06     | 0.8055866     | 1  | 0.85   | 0.24          | 3.06            |
| WHI      | 17   | 0.198 0.194 | 192 89 14 1138 530 73    | 295 1741  | 0.20     | 0.6526457     | 1  | 0.87   | 0.49          | 1.57            |
| STAGE3   | 13   | 0.258 0.228 | 287 199 35 936 547 83    | 521 1566  | 0.70     | 0.4024027     | 1  | 0.84   | 0.55          | 1.27            |
| NHS2     | 21   | 0.204 0.216 | 51 27 3 202 112 15       | 81 329    | 0.07     | 0.7878122     | 1  | 1.19   | 0.33          | 4.27            |
| PBCS2    | 13   | 0.278 0.245 | 177 141 25 402 254 45    | 343 701   | 0.16     | 0.6873546     | 1  | 0.90   | 0.54          | 1.50            |
| WHS      | 9    | 0.232 0.212 | 59 31 7 332 181 23       | 97 536    | 1.14     | 0.2865134     | 1  | 0.61   | 0.25          | 1.51            |
| PBCS 1+2 | 16   | 0.258 0.247 | 291 207 34 605 374 73    | 532 1052  | 0.22     | 0.6353461     | 1  | 1.11   | 0.73          | 1.69            |

Locus Alleles Chr Location Neighborhood  
rs724244 C|T 3p24.1 27217157 NEK10

| SUBSET   | Rank | MAF         | Geno Counts              | Subjects  | score X2 | score p-value | df | hom OR | hom OR 95% CI | hom OR 95% CI_u |
|----------|------|-------------|--------------------------|-----------|----------|---------------|----|--------|---------------|-----------------|
| STAGE1-3 | 21   | 0.267 0.273 | 597 424 83 2281 1695 328 | 1104 4304 | 0.03     | 0.8516319     | 1  | 1.02   | 0.79          | 1.33            |
| STAGE1-2 | 21   | 0.276 0.275 | 308 228 47 1429 1071 209 | 583 2709  | 0.01     | 0.9305686     | 1  | 0.99   | 0.70          | 1.38            |
| STAGE2   | 22   | 0.276 0.275 | 308 228 47 1429 1071 209 | 583 2709  | 0.01     | 0.9315578     | 1  | 0.99   | 0.70          | 1.38            |
| PBCS1    | 7    | 0.250 0.265 | 106 70 12 198 123 32     | 188 353   | 1.57     | 0.2100921     | 1  | 1.56   | 0.77          | 3.15            |
| PLCO     | 4    | 0.257 0.271 | 44 22 8 235 182 30       | 74 447    | 2.26     | 0.1327018     | 1  | 0.52   | 0.22          | 1.23            |
| WHI      | 20   | 0.295 0.280 | 145 126 24 901 708 133   | 295 1742  | 0.05     | 0.8308547     | 1  | 0.95   | 0.60          | 1.50            |
| STAGE3   | 22   | 0.258 0.270 | 290 196 37 852 624 119   | 523 1595  | 0.07     | 0.7945914     | 1  | 1.05   | 0.71          | 1.56            |
| NHS2     | 14   | 0.286 0.281 | 45 30 9 176 134 28       | 84 338    | 0.76     | 0.3822929     | 1  | 0.70   | 0.31          | 1.56            |
| PBCS2    | 20   | 0.244 0.265 | 198 121 23 381 280 48    | 342 709   | 0.03     | 0.8544515     | 1  | 1.05   | 0.62          | 1.77            |
| WHS      | 14   | 0.284 0.270 | 47 45 5 295 210 43       | 97 548    | 0.63     | 0.4284564     | 1  | 1.47   | 0.56          | 3.86            |
| PBCS 1+2 | 11   | 0.245 0.265 | 303 191 34 579 403 80    | 528 1062  | 1.05     | 0.3063367     | 1  | 1.25   | 0.82          | 1.90            |

Locus Alleles Chr Location Neighborhood  
rs4666451 G|A 2p24.1 19150424

| SUBSET   | Rank | MAF         | Geno Counts               | Subjects  | score X2 | score p-value | df | hom OR | hom OR 95% CI | hom OR 95% CI_u |
|----------|------|-------------|---------------------------|-----------|----------|---------------|----|--------|---------------|-----------------|
| STAGE1-3 | 22   | 0.387 0.385 | 415 528 164 1621 2044 634 | 1107 4299 | 0.01     | 0.9165531     | 1  | 1.01   | 0.83          | 1.22            |
| STAGE1-2 | 11   | 0.363 0.383 | 236 272 76 1028 1286 396  | 584 2710  | 0.92     | 0.3370493     | 1  | 1.14   | 0.87          | 1.49            |
| STAGE2   | 7    | 0.363 0.383 | 236 272 76 1028 1286 396  | 584 2710  | 0.91     | 0.3403086     | 1  | 1.14   | 0.87          | 1.49            |
| PBCS1    | 10   | 0.384 0.375 | 67 99 23 140 161 52       | 189 353   | 1.09     | 0.2973514     | 1  | 1.33   | 0.78          | 2.26            |
| PLCO     | 3    | 0.338 0.394 | 30 38 6 170 203 75        | 74 448    | 3.44     | 0.0634943     | 1  | 2.26   | 0.94          | 5.47            |
| WHI      | 22   | 0.351 0.378 | 130 123 42 672 822 248    | 295 1742  | 0.03     | 0.8596867     | 1  | 0.97   | 0.68          | 1.38            |
| STAGE3   | 11   | 0.413 0.388 | 179 257 88 593 760 238    | 524 1591  | 0.72     | 0.3965328     | 1  | 0.89   | 0.68          | 1.17            |
| NHS2     | 1    | 0.436 0.370 | 31 35 20 128 165 41       | 86 334    | 7.34     | 0.0067583     | 1  | 0.44   | 0.24          | 0.81            |
| PBCS2    | 8    | 0.411 0.398 | 111 181 50 263 330 118    | 342 711   | 0.85     | 0.3569487     | 1  | 1.19   | 0.83          | 1.70            |
| WHS      | 12   | 0.401 0.387 | 37 41 18 202 265 79       | 96 546    | 0.77     | 0.3797074     | 1  | 0.77   | 0.43          | 1.38            |
| PBCS 1+2 | 5    | 0.401 0.390 | 178 279 73 403 489 170    | 530 1062  | 1.72     | 0.1896864     | 1  | 1.22   | 0.91          | 1.65            |

| Locus      | Alleles | Chr         | Location                 | Neighborhood   |          |               |    |        |                 |                 |  |  |
|------------|---------|-------------|--------------------------|----------------|----------|---------------|----|--------|-----------------|-----------------|--|--|
| rs17570439 | T C     | 1p34.2      |                          | 40096797 TRIT1 |          |               |    |        |                 |                 |  |  |
| SUBSET     | Rank    | MAF         | Geno Counts              | Subjects       | score X2 | score p-value | df | hom OR | hom OR 95% CI_l | hom OR 95% CI_u |  |  |
| STAGE1-3   | 23      | 0.231 0.224 | 759 465 65 3076 1762 263 | 1289 5101      | 0.00     | 0.9560722     | 1  | 1.01   | 0.76            | 1.34            |  |  |
| NHS        | 15      | 0.238 0.245 | 107 65 11 457 304 46     | 183 807        | 0.09     | 0.76852       | 1  | 0.90   | 0.45            | 1.79            |  |  |
| STAGE1-2   | 18      | 0.233 0.229 | 446 283 37 2104 1217 196 | 766 3517       | 0.47     | 0.4930288     | 1  | 1.13   | 0.78            | 1.64            |  |  |
| STAGE2     | 10      | 0.232 0.224 | 339 218 26 1647 913 150  | 583 2710       | 0.87     | 0.3523032     | 1  | 1.23   | 0.80            | 1.90            |  |  |
| PBCS1      | 3       | 0.214 0.215 | 113 71 5 223 108 22      | 189 353        | 4.05     | 0.0442701     | 1  | 2.69   | 0.99            | 7.29            |  |  |
| PLCO       | 7       | 0.243 0.238 | 40 32 2 259 165 24       | 74 448         | 0.88     | 0.3484288     | 1  | 2.01   | 0.46            | 8.85            |  |  |
| WHI        | 18      | 0.238 0.225 | 171 106 17 1053 594 95   | 294 1742       | 0.10     | 0.7461625     | 1  | 0.92   | 0.54            | 1.56            |  |  |
| STAGE3     | 14      | 0.228 0.214 | 313 182 28 972 545 67    | 523 1584       | 0.63     | 0.4271883     | 1  | 0.83   | 0.52            | 1.32            |  |  |
| NHS2       | 13      | 0.235 0.229 | 51 28 6 194 119 16       | 85 329         | 0.76     | 0.3818617     | 1  | 0.65   | 0.24            | 1.72            |  |  |
| PBCS2      | 16      | 0.215 0.210 | 211 115 16 448 228 35    | 342 711        | 0.06     | 0.7998854     | 1  | 1.08   | 0.58            | 2.01            |  |  |
| WHS        | 7       | 0.266 0.211 | 51 39 6 330 198 16       | 96 544         | 2.02     | 0.1553369     | 1  | 0.49   | 0.18            | 1.33            |  |  |
| PBCS 1+2   | 4       | 0.215 0.211 | 324 186 21 671 336 57    | 531 1064       | 1.78     | 0.1817695     | 1  | 1.42   | 0.85            | 2.38            |  |  |

| Locus     | Alleles | Chr         | Location             | Neighborhood     |          |               |     |        |                 |                 |  |  |
|-----------|---------|-------------|----------------------|------------------|----------|---------------|-----|--------|-----------------|-----------------|--|--|
| rs2303659 | G A     | 11q24.3     |                      | 129326474 PRDM10 |          |               |     |        |                 |                 |  |  |
| SUBSET    | Rank    | MAF         | Geno Counts          | Subjects         | score X2 | score p-value | df  | hom OR | hom OR 95% CI_l | hom OR 95% CI_u |  |  |
| STAGE1-3  | 24      | 0.024 0.026 | 1229 59 2 4833 251 9 | 1290 5093        | 0.00     | 0.9734052     | 1   | 0.97   | 0.20            | 4.64            |  |  |
| NHS       | 22      | 0.022 0.026 | 175 8 0 765 42 0     | 183 807          | -        |               | 1 1 | 1.00   | 1.00            | 1.00            |  |  |
| STAGE1-2  | 23      | 0.022 0.025 | 733 34 0 3341 174 2  | 767 3517         |          |               |     |        |                 |                 |  |  |
| STAGE2    | 23      | 0.022 0.025 | 558 26 0 2576 132 2  | 584 2710         |          |               |     |        |                 |                 |  |  |
| PBCS1     | 22      | 0.021 0.024 | 181 8 0 336 17 0     | 189 353          | -        |               | 1 1 | 1.00   | 1.00            | 1.00            |  |  |
| PLCO      | 24      | 0.020 0.026 | 71 3 0 425 23 0      | 74 448           | -        |               | 1 1 | 1.00   | 1.00            | 1.00            |  |  |
| WHI       | 24      | 0.025 0.025 | 280 15 0 1655 86 1   | 295 1742         |          |               |     |        |                 |                 |  |  |
| STAGE3    | 21      | 0.028 0.029 | 496 25 2 1493 77 7   | 523 1577         | 0.07     | 0.7873284     | 1   | 0.80   | 0.16            | 4.03            |  |  |
| NHS2      | 24      | 0.000 0.030 | 84 0 0 321 14 3      | 84 338           |          |               |     |        |                 |                 |  |  |
| PBCS2     | 24      | 0.033 0.028 | 322 21 1 669 40 0    | 344 709          |          |               |     |        |                 |                 |  |  |
| WHS       | 17      | 0.032 0.029 | 90 4 1 503 23 4      | 95 530           | 0.29     | 0.5885143     | 1   | 0.54   | 0.06            | 5.09            |  |  |
| PBCS 1+2  | 24      | 0.029 0.027 | 503 29 1 1004 57 0   | 533 1061         |          |               |     |        |                 |                 |  |  |

**unadj\_geno**

| Locus      | Alleles | Chr         | Location                   | Neighborhood        |          |               |    |        |                 |                 |        |                 |                 |  |
|------------|---------|-------------|----------------------------|---------------------|----------|---------------|----|--------|-----------------|-----------------|--------|-----------------|-----------------|--|
| rs11249433 | T C     | 1p11.2      |                            | 120982136 LOC647121 |          |               |    |        |                 |                 |        |                 |                 |  |
| SUBSET     | Rank    | MAF         | Geno Counts                | Subjects            | score X2 | score p-value | df | het OR | het OR 95% CI_l | het OR 95% CI_u | hom OR | hom OR 95% CI_l | hom OR 95% CI_u |  |
| STAGE1-3   | 1       | 0.399 0.439 | 478 610 215 1655 2556 1017 | 1303 5228           | 13.82    | 0.0009971     | 2  | 1.21   | 1.06            | 1.38            | 1.37   | 1.14            | 1.63            |  |
| NHS        | 5       | 0.412 0.448 | 65 84 33 238 411 155       | 182 804             | 2.64     | 0.2677407     | 2  | 1.34   | 0.93            | 1.92            | 1.28   | 0.81            | 2.04            |  |
| STAGE1-2   | 2       | 0.407 0.441 | 271 383 126 1124 1831 695  | 780 3650            | 6.22     | 0.0446344     | 2  | 1.15   | 0.97            | 1.37            | 1.33   | 1.06            | 1.68            |  |
| STAGE2     | 2       | 0.406 0.439 | 206 299 93 886 1420 540    | 598 2846            | 4.86     | 0.0878471     | 2  | 1.10   | 0.91            | 1.34            | 1.35   | 1.03            | 1.76            |  |
| CP5II      | 1       | 0.524 0.405 | 8 24 10 108 159 48         | 42 315              | 4.65     | 0.0980062     | 2  | 0.49   | 0.21            | 1.13            | 0.36   | 0.13            | 0.96            |  |
| PBCS1      | 16      | 0.392 0.407 | 67 96 26 124 171 58        | 189 353             | 0.71     | 0.7012692     | 2  | 0.96   | 0.65            | 1.42            | 1.21   | 0.70            | 2.09            |  |
| PLCO       | 16      | 0.411 0.427 | 26 34 13 140 232 75        | 73 447              | 0.75     | 0.6872213     | 2  | 1.27   | 0.73            | 2.20            | 1.07   | 0.52            | 2.21            |  |
| WHI        | 1       | 0.396 0.455 | 105 145 44 514 858 359     | 294 1731            | 7.19     | 0.0274276     | 2  | 1.21   | 0.92            | 1.59            | 1.67   | 1.14            | 2.43            |  |
| STAGE3     | 2       | 0.387 0.434 | 207 227 89 531 725 322     | 523 1578            | 6.80     | 0.0334338     | 2  | 1.25   | 1.00            | 1.55            | 1.41   | 1.06            | 1.87            |  |
| NHS2       | 22      | 0.450 0.440 | 29 41 20 114 152 73        | 90 339              | 0.07     | 0.9676014     | 2  | 0.94   | 0.55            | 1.61            | 0.93   | 0.49            | 1.76            |  |
| PBCS2      | 8       | 0.372 0.410 | 137 149 51 246 324 121     | 337 691             | 2.67     | 0.2632401     | 2  | 1.21   | 0.91            | 1.61            | 1.32   | 0.90            | 1.95            |  |
| WHS        | 3       | 0.380 0.461 | 41 37 18 171 249 128       | 96 548              | 4.92     | 0.0852699     | 2  | 1.61   | 0.99            | 2.62            | 1.71   | 0.94            | 3.11            |  |
| PBCS 1+2   | 6       | 0.379 0.409 | 204 245 77 370 495 179     | 526 1044            | 2.47     | 0.2910101     | 2  | 1.11   | 0.89            | 1.40            | 1.28   | 0.93            | 1.76            |  |

| Locus      | Alleles | Chr      | Location    | Neighborhood |          |               |    |        |                 |                 |        |                 |                 |  |
|------------|---------|----------|-------------|--------------|----------|---------------|----|--------|-----------------|-----------------|--------|-----------------|-----------------|--|
| rs12608723 | A G     | 19q13.11 |             | 38508973     |          |               |    |        |                 |                 |        |                 |                 |  |
| SUBSET     | Rank    | MAF      | Geno Counts | Subjects     | score X2 | score p-value | df | het OR | het OR 95% CI_l | het OR 95% CI_u | hom OR | hom OR 95% CI_l | hom OR 95% CI_u |  |

|          |    |             |                          |           |       |           |   |      |      |      |      |      |       |
|----------|----|-------------|--------------------------|-----------|-------|-----------|---|------|------|------|------|------|-------|
| STAGE1-3 | 2  | 0.131 0.121 | 1001 279 33 4075 1120 78 | 1313 5273 | 6.82  | 0.0330695 | 2 | 0.99 | 0.85 | 1.14 | 0.58 | 0.38 | 0.88  |
| NHS      | 1  | 0.156 0.121 | 127 55 1 624 169 13      | 183 806   | 7.90  | 0.0192665 | 2 | 0.63 | 0.44 | 0.90 | 2.65 | 0.34 | 20.41 |
| STAGE1-2 | 1  | 0.143 0.121 | 581 180 22 2831 783 52   | 783 3666  | 9.07  | 0.0107358 | 2 | 0.89 | 0.74 | 1.07 | 0.49 | 0.29 | 0.80  |
| STAGE2   | 1  | 0.139 0.121 | 454 125 21 2207 614 39   | 600 2860  | 13.29 | 0.0012991 | 2 | 1.01 | 0.81 | 1.26 | 0.38 | 0.22 | 0.66  |
| CPSII    | 7  | 0.131 0.114 | 33 7 2 250 60 6          | 42 316    | 1.47  | 0.4799689 | 2 | 1.13 | 0.48 | 2.68 | 0.40 | 0.08 | 2.04  |
| PBCS1    | 8  | 0.135 0.110 | 142 43 4 278 72 3        | 189 353   | 2.06  | 0.3572063 | 2 | 0.86 | 0.56 | 1.31 | 0.38 | 0.08 | 1.74  |
| PLCO     | 1  | 0.162 0.116 | 57 10 7 348 96 4         | 74 448    | 24.08 | 5.90E-06  | 2 | 1.57 | 0.77 | 3.19 | 0.09 | 0.03 | 0.33  |
| WHI      | 12 | 0.137 0.126 | 222 65 8 1331 386 26     | 295 1743  | 2.29  | 0.3176364 | 2 | 0.99 | 0.73 | 1.34 | 0.54 | 0.24 | 1.21  |
| STAGE3   | 12 | 0.115 0.122 | 420 100 11 1244 340 26   | 531 1610  | 1.67  | 0.4341526 | 2 | 1.15 | 0.90 | 1.47 | 0.80 | 0.39 | 1.63  |
| NHS2     | 4  | 0.132 0.117 | 71 16 4 272 72 5         | 91 349    | 3.43  | 0.1796706 | 2 | 1.17 | 0.64 | 2.14 | 0.33 | 0.09 | 1.25  |
| PBCS2    | 14 | 0.102 0.119 | 276 62 4 554 145 12      | 342 711   | 1.24  | 0.5385503 | 2 | 1.17 | 0.84 | 1.62 | 1.49 | 0.48 | 4.68  |
| WHS      | 17 | 0.143 0.128 | 73 22 3 418 123 9        | 98 550    | 0.94  | 0.6258721 | 2 | 0.98 | 0.58 | 1.64 | 0.52 | 0.14 | 1.98  |
| PBCS 1+2 | 22 | 0.113 0.115 | 418 104 8 832 214 15     | 530 1061  | 0.08  | 0.9586516 | 2 | 1.03 | 0.80 | 1.34 | 0.94 | 0.40 | 2.24  |

Locus Alleles Chr Location Neighborhood  
rs9491859 C|A 6q22.33 128106056 C6orf190

| SUBSET   | Rank | MAF         | Geno Counts               | Subjects  | score X2 | score p-value | df | het OR | het OR 95% CI | het OR 95% CI | hom OR | hom OR 95% CI | hom OR 95% CI_u |
|----------|------|-------------|---------------------------|-----------|----------|---------------|----|--------|---------------|---------------|--------|---------------|-----------------|
| STAGE1-3 | 3    | 0.357 0.376 | 534 613 160 2089 2392 784 | 1307 5265 | 5.97     | 0.0504192     | 2  | 1.00   | 0.88          | 1.14          | 1.25   | 1.03          | 1.52            |
| NHS      | 13   | 0.388 0.375 | 67 90 26 325 359 123      | 183 807   | 1.34     | 0.5128149     | 2  | 0.82   | 0.58          | 1.17          | 0.98   | 0.59          | 1.60            |
| STAGE1-2 | 12   | 0.372 0.376 | 308 368 107 1462 1649 555 | 783 3666  | 1.57     | 0.4563041     | 2  | 0.94   | 0.80          | 1.12          | 1.09   | 0.86          | 1.39            |
| STAGE2   | 13   | 0.367 0.377 | 241 278 81 1137 1290 432  | 600 2859  | 1.05     | 0.5922942     | 2  | 0.98   | 0.81          | 1.19          | 1.13   | 0.86          | 1.49            |
| CPSII    | 24   | 0.274 0.351 | 19 23 0 137 136 43        | 42 316    |          |               |    |        |               |               |        |               |                 |
| PBCS1    | 17   | 0.354 0.364 | 83 78 28 147 154 51       | 189 352   | 0.32     | 0.8523345     | 2  | 1.11   | 0.76          | 1.63          | 1.03   | 0.60          | 1.75            |
| PLCO     | 19   | 0.378 0.376 | 29 34 11 170 219 59       | 74 448    | 0.27     | 0.8715613     | 2  | 1.10   | 0.64          | 1.88          | 0.92   | 0.43          | 1.95            |
| WHI      | 14   | 0.385 0.384 | 110 143 42 683 781 279    | 295 1743  | 1.48     | 0.4763555     | 2  | 0.88   | 0.67          | 1.15          | 1.07   | 0.73          | 1.57            |
| STAGE3   | 3    | 0.335 0.375 | 226 245 53 628 743 229    | 524 1600  | 6.73     | 0.0346344     | 2  | 1.09   | 0.88          | 1.35          | 1.55   | 1.11          | 2.17            |
| NHS2     | 16   | 0.349 0.366 | 36 40 10 147 152 53       | 86 352    | 0.74     | 0.690758      | 2  | 0.93   | 0.56          | 1.54          | 1.30   | 0.60          | 2.80            |
| PBCS2    | 7    | 0.335 0.365 | 146 160 34 286 322 96     | 340 704   | 2.82     | 0.2443289     | 2  | 1.03   | 0.78          | 1.35          | 1.44   | 0.93          | 2.24            |
| WHS      | 6    | 0.321 0.394 | 44 45 9 195 269 80        | 98 544    | 3.87     | 0.1447022     | 2  | 1.35   | 0.86          | 2.13          | 2.01   | 0.94          | 4.30            |
| PBCS 1+2 | 9    | 0.342 0.365 | 229 238 62 432 476 147    | 529 1055  | 1.77     | 0.4122232     | 2  | 1.06   | 0.85          | 1.33          | 1.26   | 0.90          | 1.76            |

Locus Alleles Chr Location Neighborhood  
rs7716600 C|A 5p12 44910762

| SUBSET   | Rank | MAF         | Geno Counts              | Subjects  | score X2 | score p-value | df | het OR | het OR 95% CI | het OR 95% CI | hom OR | hom OR 95% CI | hom OR 95% CI_u |
|----------|------|-------------|--------------------------|-----------|----------|---------------|----|--------|---------------|---------------|--------|---------------|-----------------|
| STAGE1-3 | 4    | 0.221 0.243 | 800 446 67 3042 1901 333 | 1313 5276 | 5.72     | 0.0573559     | 2  | 1.12   | 0.99          | 1.28          | 1.31   | 0.99          | 1.72            |
| NHS      | 10   | 0.246 0.253 | 108 60 15 451 303 53     | 183 807   | 1.76     | 0.4154137     | 2  | 1.21   | 0.85          | 1.71          | 0.85   | 0.46          | 1.56            |
| STAGE1-2 | 5    | 0.227 0.249 | 473 265 45 2095 1316 253 | 783 3664  | 3.24     | 0.1982456     | 2  | 1.12   | 0.95          | 1.32          | 1.27   | 0.91          | 1.77            |
| STAGE2   | 4    | 0.221 0.247 | 365 205 30 1644 1013 200 | 600 2857  | 4.14     | 0.1261645     | 2  | 1.10   | 0.91          | 1.32          | 1.48   | 0.99          | 2.21            |
| CPSII    | 17   | 0.226 0.241 | 26 13 3 186 108 22       | 42 316    | 0.17     | 0.9167629     | 2  | 1.16   | 0.57          | 2.35          | 1.03   | 0.29          | 3.67            |
| PBCS1    | 20   | 0.272 0.272 | 99 77 13 186 139 26      | 189 351   | 0.10     | 0.9530477     | 2  | 0.96   | 0.66          | 1.39          | 1.06   | 0.52          | 2.16            |
| PLCO     | 5    | 0.169 0.232 | 52 19 3 261 166 21       | 74 448    | 3.90     | 0.1420342     | 2  | 1.74   | 0.99          | 3.05          | 1.39   | 0.40          | 4.85            |
| WHI      | 2    | 0.200 0.247 | 188 96 11 1011 600 131   | 295 1742  | 6.86     | 0.0324322     | 2  | 1.16   | 0.89          | 1.52          | 2.21   | 1.17          | 4.18            |
| STAGE3   | 13   | 0.212 0.231 | 327 181 22 948 587 79    | 530 1614  | 1.61     | 0.4481547     | 2  | 1.12   | 0.91          | 1.38          | 1.24   | 0.76          | 2.02            |
| NHS2     | 15   | 0.261 0.232 | 49 35 6 205 131 16       | 90 352    | 0.88     | 0.6437466     | 2  | 0.89   | 0.55          | 1.45          | 0.64   | 0.24          | 1.71            |
| PBCS2    | 3    | 0.195 0.233 | 219 111 11 417 254 38    | 341 709   | 4.07     | 0.1307988     | 2  | 1.20   | 0.91          | 1.58          | 1.81   | 0.91          | 3.62            |
| WHS      | 23   | 0.227 0.228 | 59 35 5 326 202 25       | 99 553    | 0.09     | 0.9564842     | 2  | 1.04   | 0.66          | 1.64          | 0.90   | 0.33          | 2.46            |
| PBCS 1+2 | 7    | 0.223 0.246 | 318 188 24 602 391 65    | 530 1058  | 2.44     | 0.2947345     | 2  | 1.10   | 0.88          | 1.37          | 1.43   | 0.88          | 2.33            |

Locus Alleles Chr Location Neighborhood  
rs3817198 T|C 11p15.5 1865582 LSP1

| SUBSET   | Rank | MAF         | Geno Counts               | Subjects  | score X2 | score p-value | df | het OR | het OR 95% CI | het OR 95% CI | hom OR | hom OR 95% CI | hom OR 95% CI_u |
|----------|------|-------------|---------------------------|-----------|----------|---------------|----|--------|---------------|---------------|--------|---------------|-----------------|
| STAGE1-3 | 5    | 0.323 0.335 | 592 587 129 2368 2287 625 | 1308 5280 | 4.20     | 0.1225441     | 2  | 0.97   | 0.86          | 1.11          | 1.21   | 0.98          | 1.49            |
| NHS      | 3    | 0.308 0.328 | 82 88 12 373 339 95       | 182 807   | 5.11     | 0.0777137     | 2  | 0.85   | 0.61          | 1.18          | 1.74   | 0.91          | 3.32            |
| STAGE1-2 | 3    | 0.335 0.337 | 336 366 78 1631 1595 436  | 780 3662  | 3.98     | 0.1366226     | 2  | 0.90   | 0.76          | 1.06          | 1.15   | 0.88          | 1.51            |

|          |    |             |                          |          |      |           |   |      |      |      |      |      |       |
|----------|----|-------------|--------------------------|----------|------|-----------|---|------|------|------|------|------|-------|
| STAGE2   | 12 | 0.343 0.339 | 254 278 66 1258 1256 341 | 598 2855 | 1.32 | 0.5160774 | 2 | 0.91 | 0.76 | 1.10 | 1.04 | 0.78 | 1.40  |
| CPSII    | 13 | 0.381 0.340 | 16 20 6 139 138 38       | 42 315   | 0.58 | 0.748061  | 2 | 0.79 | 0.40 | 1.60 | 0.73 | 0.27 | 1.99  |
| PBCS1    | 14 | 0.321 0.326 | 84 86 17 161 150 39      | 187 350  | 0.80 | 0.6718816 | 2 | 0.91 | 0.63 | 1.32 | 1.20 | 0.64 | 2.24  |
| PLCO     | 18 | 0.365 0.334 | 28 38 8 190 215 42       | 74 447   | 0.60 | 0.7403105 | 2 | 0.83 | 0.49 | 1.41 | 0.77 | 0.33 | 1.82  |
| WHI      | 19 | 0.346 0.343 | 126 134 35 768 753 222   | 295 1743 | 0.54 | 0.7620993 | 2 | 0.92 | 0.71 | 1.20 | 1.04 | 0.70 | 1.56  |
| STAGE3   | 9  | 0.308 0.331 | 255 222 52 734 693 189   | 529 1616 | 1.98 | 0.3710204 | 2 | 1.08 | 0.88 | 1.33 | 1.26 | 0.90 | 1.77  |
| NHS2     | 2  | 0.264 0.331 | 52 30 9 162 155 41       | 91 358   | 4.19 | 0.1230387 | 2 | 1.66 | 1.01 | 2.74 | 1.46 | 0.67 | 3.21  |
| PBCS2    | 22 | 0.333 0.330 | 154 148 40 326 301 84    | 342 711  | 0.08 | 0.9584781 | 2 | 0.96 | 0.73 | 1.26 | 0.99 | 0.65 | 1.51  |
| WHS      | 2  | 0.260 0.334 | 49 44 3 246 237 64       | 96 547   | 6.54 | 0.0380763 | 2 | 1.07 | 0.69 | 1.67 | 4.25 | 1.28 | 14.08 |
| PBCS 1+2 | 19 | 0.327 0.327 | 239 233 56 490 450 123   | 528 1063 | 0.61 | 0.7370822 | 2 | 0.94 | 0.76 | 1.18 | 1.07 | 0.75 | 1.52  |

Locus Alleles Chr Location Neighborhood  
rs2067980 A|G 5p12 45018074

| SUBSET   | Rank | MAF         | Geno Counts              | Subjects  | score X2 | score p-value | df | het OR | het OR 95% CI | het OR 95% CI | hom OR | hom OR 95% CI | hom OR 95% CI_u |
|----------|------|-------------|--------------------------|-----------|----------|---------------|----|--------|---------------|---------------|--------|---------------|-----------------|
| STAGE1-3 | 6    | 0.164 0.176 | 915 363 34 3610 1460 197 | 1312 5267 | 4.17     | 0.1243521     | 2  | 1.02   | 0.89          | 1.17          | 1.47   | 1.01          | 2.13            |
| NHS      | 20   | 0.172 0.179 | 125 53 5 542 240 24      | 183 806   | 0.09     | 0.9565086     | 2  | 1.04   | 0.73          | 1.49          | 1.11   | 0.41          | 2.96            |
| STAGE1-2 | 20   | 0.173 0.176 | 538 219 26 2510 1021 135 | 783 3666  | 0.24     | 0.8858668     | 2  | 1.00   | 0.84          | 1.19          | 1.11   | 0.72          | 1.71            |
| STAGE2   | 21   | 0.173 0.175 | 413 166 21 1968 781 111  | 600 2860  | 0.21     | 0.8993289     | 2  | 0.99   | 0.81          | 1.20          | 1.11   | 0.69          | 1.79            |
| CPSII    | 16   | 0.190 0.171 | 28 12 2 221 82 13        | 42 316    | 0.19     | 0.9088189     | 2  | 0.87   | 0.42          | 1.78          | 0.82   | 0.18          | 3.84            |
| PBCS1    | 13   | 0.251 0.231 | 107 69 13 208 127 18     | 189 353   | 0.80     | 0.66904       | 2  | 0.95   | 0.65          | 1.38          | 0.71   | 0.34          | 1.51            |
| PLCO     | 11   | 0.122 0.156 | 57 16 1 322 112 14       | 74 448    | 1.22     | 0.5425203     | 2  | 1.24   | 0.68          | 2.25          | 2.48   | 0.32          | 19.22           |
| WHI      | 4    | 0.134 0.170 | 221 69 5 1217 460 66     | 295 1743  | 4.97     | 0.0832594     | 2  | 1.21   | 0.91          | 1.62          | 2.40   | 0.95          | 6.02            |
| STAGE3   | 1    | 0.151 0.176 | 377 144 8 1100 440 62    | 529 1602  | 7.13     | 0.0283257     | 2  | 1.05   | 0.84          | 1.31          | 2.66   | 1.26          | 5.60            |
| NHS2     | 23   | 0.148 0.162 | 62 26 0 249 82 15        | 88 346    |          |               |    |        |               |               |        |               |                 |
| PBCS2    | 5    | 0.156 0.188 | 243 93 7 467 211 27      | 343 705   | 3.63     | 0.1629407     | 2  | 1.18   | 0.88          | 1.58          | 2.01   | 0.86          | 4.68            |
| WHS      | 12   | 0.138 0.170 | 72 25 1 384 147 20       | 98 551    | 1.96     | 0.3748168     | 2  | 1.10   | 0.67          | 1.81          | 3.75   | 0.50          | 28.38           |
| PBCS 1+2 | 17   | 0.190 0.202 | 350 162 20 675 337 45    | 532 1057  | 0.65     | 0.7226425     | 2  | 1.08   | 0.86          | 1.35          | 1.17   | 0.68          | 2.01            |

Locus Alleles Chr Location Neighborhood  
rs2391406 T|G 13q33.3 106586873

| SUBSET   | Rank | MAF         | Geno Counts               | Subjects  | score X2 | score p-value | df | het OR | het OR 95% CI | het OR 95% CI | hom OR | hom OR 95% CI | hom OR 95% CI_u |
|----------|------|-------------|---------------------------|-----------|----------|---------------|----|--------|---------------|---------------|--------|---------------|-----------------|
| STAGE1-3 | 7    | 0.359 0.367 | 521 636 152 2088 2463 694 | 1309 5245 | 2.72     | 0.2571611     | 2  | 0.97   | 0.85          | 1.10          | 1.14   | 0.93          | 1.39            |
| NHS      | 14   | 0.358 0.366 | 72 91 20 323 377 107      | 183 807   | 0.93     | 0.6266846     | 2  | 0.92   | 0.66          | 1.30          | 1.19   | 0.69          | 2.05            |
| STAGE1-2 | 16   | 0.355 0.363 | 314 380 87 1453 1759 451  | 781 3663  | 0.83     | 0.6596539     | 2  | 1.00   | 0.85          | 1.18          | 1.12   | 0.86          | 1.45            |
| STAGE2   | 17   | 0.354 0.362 | 242 289 67 1130 1382 344  | 598 2856  | 0.40     | 0.820564      | 2  | 1.02   | 0.85          | 1.24          | 1.10   | 0.82          | 1.48            |
| CPSII    | 4    | 0.402 0.339 | 12 25 4 132 150 31        | 41 313    | 2.73     | 0.2548601     | 2  | 0.55   | 0.26          | 1.13          | 0.70   | 0.21          | 2.33            |
| PBCS1    | 5    | 0.362 0.375 | 78 84 26 125 190 37       | 188 352   | 4.41     | 0.1103076     | 2  | 1.41   | 0.96          | 2.07          | 0.89   | 0.50          | 1.58            |
| PLCO     | 9    | 0.345 0.360 | 29 39 6 180 213 55        | 74 448    | 1.31     | 0.5194465     | 2  | 0.88   | 0.52          | 1.48          | 1.48   | 0.58          | 3.74            |
| WHI      | 15   | 0.344 0.365 | 123 141 31 693 829 221    | 295 1743  | 1.20     | 0.548645      | 2  | 1.04   | 0.80          | 1.36          | 1.27   | 0.83          | 1.93            |
| STAGE3   | 6    | 0.365 0.376 | 207 255 65 635 705 243    | 527 1583  | 3.82     | 0.147867      | 2  | 0.90   | 0.73          | 1.11          | 1.22   | 0.89          | 1.67            |
| NHS2     | 9    | 0.348 0.402 | 37 42 10 129 162 60       | 89 351    | 1.99     | 0.3705927     | 2  | 1.11   | 0.67          | 1.82          | 1.72   | 0.80          | 3.69            |
| PBCS2    | 10   | 0.382 0.381 | 126 171 45 275 321 108    | 342 704   | 1.99     | 0.3688323     | 2  | 0.86   | 0.65          | 1.14          | 1.10   | 0.73          | 1.65            |
| WHS      | 16   | 0.323 0.352 | 44 42 10 231 222 75       | 96 528    | 0.99     | 0.6091443     | 2  | 1.01   | 0.63          | 1.60          | 1.43   | 0.69          | 2.98            |
| PBCS 1+2 | 23   | 0.375 0.379 | 204 256 71 400 510 145    | 531 1055  | 0.06     | 0.9700365     | 2  | 1.02   | 0.81          | 1.27          | 1.04   | 0.75          | 1.45            |

Locus Alleles Chr Location Neighborhood  
rs12622050 G|A 2q11.2 100945886 NPAS2

| SUBSET   | Rank | MAF         | Geno Counts              | Subjects  | score X2 | score p-value | df | het OR | het OR 95% CI | het OR 95% CI | hom OR | hom OR 95% CI | hom OR 95% CI_u |
|----------|------|-------------|--------------------------|-----------|----------|---------------|----|--------|---------------|---------------|--------|---------------|-----------------|
| STAGE1-3 | 8    | 0.223 0.208 | 795 444 70 3307 1695 246 | 1309 5248 | 2.66     | 0.2641403     | 2  | 0.92   | 0.81          | 1.05          | 0.84   | 0.64          | 1.11            |
| NHS      | 12   | 0.191 0.189 | 122 52 9 529 251 27      | 183 807   | 1.39     | 0.4979787     | 2  | 1.11   | 0.78          | 1.59          | 0.69   | 0.32          | 1.51            |
| STAGE1-2 | 22   | 0.200 0.200 | 504 243 35 2361 1141 162 | 782 3664  | 0.01     | 0.9973911     | 2  | 1.00   | 0.85          | 1.19          | 0.99   | 0.68          | 1.44            |
| STAGE2   | 20   | 0.203 0.203 | 382 191 26 1832 890 135  | 599 2857  | 0.25     | 0.8814952     | 2  | 0.97   | 0.80          | 1.18          | 1.08   | 0.70          | 1.67            |
| CPSII    | 21   | 0.146 0.213 | 29 12 0 201 94 20        | 41 315    |          |               |    |        |               |               |        |               |                 |
| PBCS1    | 10   | 0.222 0.249 | 114 66 9 204 121 27      | 189 352   | 1.69     | 0.4293973     | 2  | 1.02   | 0.70          | 1.49          | 1.68   | 0.76          | 3.69            |

|          |    |             |                       |          |      |           |   |      |      |      |      |      |      |
|----------|----|-------------|-----------------------|----------|------|-----------|---|------|------|------|------|------|------|
| PLCO     | 21 | 0.203 0.195 | 47 24 3 288 145 15    | 74 448   | 0.10 | 0.9523018 | 2 | 0.99 | 0.58 | 1.68 | 0.82 | 0.23 | 2.93 |
| WHI      | 20 | 0.198 0.194 | 192 89 14 1139 530 73 | 295 1742 | 0.19 | 0.9089443 | 2 | 1.00 | 0.77 | 1.32 | 0.88 | 0.49 | 1.59 |
| STAGE3   | 5  | 0.257 0.227 | 291 201 35 947 555 83 | 527 1585 | 3.86 | 0.145157  | 2 | 0.85 | 0.69 | 1.04 | 0.73 | 0.48 | 1.11 |
| NHS2     | 21 | 0.206 0.215 | 53 29 3 210 117 15    | 85 342   | 0.13 | 0.9377118 | 2 | 1.02 | 0.61 | 1.69 | 1.26 | 0.35 | 4.52 |
| PBCS2    | 6  | 0.278 0.245 | 177 141 25 402 254 45 | 343 701  | 3.08 | 0.2148892 | 2 | 0.79 | 0.60 | 1.04 | 0.79 | 0.47 | 1.33 |
| WHS      | 14 | 0.227 0.212 | 61 31 7 335 184 23    | 99 542   | 1.60 | 0.4485628 | 2 | 1.08 | 0.68 | 1.73 | 0.60 | 0.25 | 1.46 |
| PBCS 1+2 | 10 | 0.258 0.247 | 291 207 34 605 374 73 | 532 1052 | 1.74 | 0.4195856 | 2 | 0.87 | 0.70 | 1.08 | 1.03 | 0.67 | 1.59 |

Locus Alleles Chr Location Neighborhood  
rs7936636 C|T 11p11.2 44397546

| SUBSET   | Rank | MAF         | Geno Counts              | Subjects  | score X2 | score p-value | df | het OR | het OR 95% CI | het OR 95% CI | hom OR | hom OR 95% CI | hom OR 95% CI_u |
|----------|------|-------------|--------------------------|-----------|----------|---------------|----|--------|---------------|---------------|--------|---------------|-----------------|
| STAGE1-3 | 9    | 0.234 0.249 | 773 464 75 2989 1934 347 | 1312 5270 | 2.64     | 0.2676472     | 2  | 1.08   | 0.95          | 1.23          | 1.20   | 0.92          | 1.55            |
| NHS      | 4    | 0.219 0.247 | 110 66 7 470 276 61      | 183 807   | 3.27     | 0.1952732     | 2  | 0.98   | 0.70          | 1.37          | 2.04   | 0.91          | 4.58            |
| STAGE1-2 | 9    | 0.226 0.245 | 474 264 45 2117 1303 246 | 783 3666  | 2.39     | 0.3029723     | 2  | 1.11   | 0.94          | 1.30          | 1.22   | 0.88          | 1.71            |
| STAGE2   | 10   | 0.228 0.244 | 364 198 38 1647 1027 185 | 600 2859  | 2.01     | 0.366389      | 2  | 1.15   | 0.95          | 1.39          | 1.08   | 0.75          | 1.55            |
| CPSII    | 9    | 0.274 0.222 | 23 15 4 197 98 21        | 42 316    | 1.05     | 0.5927303     | 2  | 0.76   | 0.38          | 1.53          | 0.61   | 0.19          | 1.94            |
| PBCS1    | 21   | 0.228 0.229 | 115 62 12 212 119 21     | 189 352   | 0.07     | 0.9634992     | 2  | 1.04   | 0.71          | 1.53          | 0.95   | 0.45          | 2.00            |
| PLCO     | 10   | 0.243 0.253 | 45 22 7 254 161 33       | 74 448    | 1.25     | 0.535525      | 2  | 1.30   | 0.75          | 2.24          | 0.84   | 0.35          | 2.00            |
| WHI      | 9    | 0.219 0.249 | 181 99 15 984 649 110    | 295 1743  | 2.61     | 0.2715202     | 2  | 1.21   | 0.93          | 1.57          | 1.35   | 0.77          | 2.37            |
| STAGE3   | 20   | 0.246 0.259 | 299 200 30 872 631 100   | 529 1603  | 0.78     | 0.6758018     | 2  | 1.08   | 0.88          | 1.33          | 1.14   | 0.74          | 1.75            |
| NHS2     | 18   | 0.233 0.241 | 51 33 4 204 123 23       | 88 350    | 0.58     | 0.7485451     | 2  | 0.93   | 0.57          | 1.52          | 1.44   | 0.48          | 4.34            |
| PBCS2    | 21   | 0.265 0.268 | 185 133 24 372 282 47    | 342 701   | 0.18     | 0.9130033     | 2  | 1.05   | 0.80          | 1.38          | 0.97   | 0.58          | 1.64            |
| WHS      | 4    | 0.192 0.259 | 63 34 2 296 226 30       | 99 552    | 4.43     | 0.1090148     | 2  | 1.41   | 0.90          | 2.22          | 3.19   | 0.74          | 13.71           |
| PBCS 1+2 | 21   | 0.251 0.256 | 300 195 36 584 401 69    | 531 1054  | 0.27     | 0.8744586     | 2  | 1.06   | 0.85          | 1.32          | 0.98   | 0.64          | 1.51            |

Locus Alleles Chr Location Neighborhood  
rs999737 C|T 14q24.1 68104435 RAD51L1

| SUBSET   | Rank | MAF         | Geno Counts              | Subjects  | score X2 | score p-value | df | het OR | het OR 95% CI | het OR 95% CI | hom OR | hom OR 95% CI | hom OR 95% CI_u |
|----------|------|-------------|--------------------------|-----------|----------|---------------|----|--------|---------------|---------------|--------|---------------|-----------------|
| STAGE1-3 | 10   | 0.229 0.216 | 773 472 64 3232 1803 234 | 1309 5269 | 2.39     | 0.3025389     | 2  | 0.91   | 0.80          | 1.04          | 0.87   | 0.66          | 1.17            |
| NHS      | 8    | 0.239 0.209 | 105 67 10 499 278 30     | 182 807   | 1.81     | 0.4035994     | 2  | 0.87   | 0.62          | 1.23          | 0.63   | 0.30          | 1.33            |
| STAGE1-2 | 13   | 0.224 0.211 | 469 275 38 2274 1237 156 | 782 3667  | 1.37     | 0.5053423     | 2  | 0.93   | 0.79          | 1.09          | 0.85   | 0.59          | 1.22            |
| STAGE2   | 16   | 0.220 0.212 | 364 208 28 1775 959 126  | 600 2860  | 0.42     | 0.8098376     | 2  | 0.95   | 0.78          | 1.14          | 0.92   | 0.60          | 1.41            |
| CPSII    | 14   | 0.214 0.223 | 27 12 3 193 105 18       | 42 316    | 0.44     | 0.8023692     | 2  | 1.22   | 0.60          | 2.52          | 0.84   | 0.23          | 3.04            |
| PBCS1    | 4    | 0.228 0.203 | 115 62 12 219 125 9      | 189 353   | 4.86     | 0.0881458     | 2  | 1.06   | 0.72          | 1.55          | 0.39   | 0.16          | 0.96            |
| PLCO     | 12   | 0.189 0.225 | 48 24 2 262 170 16       | 74 448    | 1.09     | 0.5786154     | 2  | 1.30   | 0.77          | 2.20          | 1.47   | 0.33          | 6.58            |
| WHI      | 8    | 0.224 0.208 | 174 110 11 1101 559 83   | 295 1743  | 3.38     | 0.1843701     | 2  | 0.80   | 0.62          | 1.04          | 1.19   | 0.62          | 2.28            |
| STAGE3   | 21   | 0.236 0.225 | 305 197 26 959 567 78    | 528 1604  | 0.70     | 0.7033715     | 2  | 0.92   | 0.74          | 1.13          | 0.95   | 0.60          | 1.51            |
| NHS2     | 12   | 0.208 0.234 | 55 31 3 205 120 21       | 89 346    | 1.01     | 0.6029615     | 2  | 1.04   | 0.63          | 1.70          | 1.88   | 0.54          | 6.53            |
| PBCS2    | 18   | 0.234 0.224 | 198 125 17 422 248 34    | 340 704   | 0.28     | 0.8702588     | 2  | 0.93   | 0.71          | 1.22          | 0.94   | 0.51          | 1.72            |
| WHS      | 11   | 0.268 0.221 | 52 41 6 332 199 23       | 99 554    | 2.16     | 0.3393334     | 2  | 0.76   | 0.49          | 1.19          | 0.60   | 0.23          | 1.54            |
| PBCS 1+2 | 11   | 0.232 0.217 | 312 187 29 640 372 43    | 528 1055  | 1.70     | 0.4274835     | 2  | 0.97   | 0.78          | 1.21          | 0.72   | 0.44          | 1.18            |

Locus Alleles Chr Location Neighborhood  
rs10941679 A|G 5p12 44742255

| SUBSET   | Rank | MAF         | Geno Counts            | Subjects | score X2 | score p-value | df | het OR | het OR 95% CI | het OR 95% CI | hom OR | hom OR 95% CI | hom OR 95% CI_u |
|----------|------|-------------|------------------------|----------|----------|---------------|----|--------|---------------|---------------|--------|---------------|-----------------|
| STAGE1-3 | 11   | 0.262 0.282 | 383 276 47 991 791 148 | 706 1930 | 2.01     | 0.3667166     | 2  | 1.11   | 0.92          | 1.33          | 1.22   | 0.86          | 1.72            |
| STAGE3   | 4    | 0.245 0.277 | 298 198 30 830 650 118 | 526 1598 | 4.17     | 0.1241572     | 2  | 1.18   | 0.96          | 1.45          | 1.41   | 0.93          | 2.15            |
| NHS2     | 14   | 0.262 0.283 | 49 29 8 181 137 30     | 86 348   | 0.93     | 0.6274178     | 2  | 1.28   | 0.77          | 2.13          | 1.02   | 0.44          | 2.35            |
| PBCS2    | 1    | 0.235 0.288 | 196 130 15 350 308 50  | 341 708  | 7.09     | 0.0288646     | 2  | 1.33   | 1.01          | 1.74          | 1.87   | 1.02          | 3.41            |
| WHS      | 22   | 0.268 0.259 | 53 39 7 299 205 38     | 99 542   | 0.10     | 0.9534966     | 2  | 0.93   | 0.59          | 1.46          | 0.96   | 0.41          | 2.27            |
| PBCS 1+2 | 3    | 0.261 0.293 | 281 208 32 511 449 80  | 521 1040 | 3.61     | 0.164468      | 2  | 1.19   | 0.95          | 1.48          | 1.37   | 0.89          | 2.12            |

Locus Alleles Chr Location Neighborhood  
rs998592 G|A 16p13.13 11107179 CLEC16A



| SUBSET   | Rank | MAF         | Geno Counts               | Subjects  | score X2 | score p-value | df | het OR | het OR 95% CI | het OR 95% CI | hom OR | hom OR 95% CI | hom OR 95% CI_u |
|----------|------|-------------|---------------------------|-----------|----------|---------------|----|--------|---------------|---------------|--------|---------------|-----------------|
| STAGE1-3 | 12   | 0.405 0.418 | 452 660 202 1751 2638 885 | 1314 5274 | 1.72     | 0.4223459     | 2  | 1.03   | 0.90          | 1.18          | 1.13   | 0.94          | 1.36            |
| NHS      | 17   | 0.434 0.429 | 54 99 30 253 415 139      | 183 807   | 0.43     | 0.8069602     | 2  | 0.89   | 0.62          | 1.29          | 0.99   | 0.60          | 1.62            |
| STAGE1-2 | 7    | 0.402 0.425 | 270 396 117 1181 1857 629 | 783 3667  | 2.91     | 0.2337785     | 2  | 1.07   | 0.90          | 1.27          | 1.23   | 0.97          | 1.56            |
| STAGE2   | 5    | 0.393 0.423 | 216 297 87 928 1442 490   | 600 2860  | 4.04     | 0.132788      | 2  | 1.13   | 0.93          | 1.37          | 1.31   | 1.00          | 1.72            |
| CPSII    | 12   | 0.369 0.416 | 17 19 6 107 155 54        | 42 316    | 0.75     | 0.6862368     | 2  | 1.30   | 0.64          | 2.61          | 1.43   | 0.53          | 3.83            |
| PBCS1    | 18   | 0.368 0.368 | 74 91 24 141 164 48       | 189 353   | 0.17     | 0.918989      | 2  | 0.95   | 0.65          | 1.38          | 1.05   | 0.60          | 1.85            |
| PLCO     | 15   | 0.426 0.393 | 25 35 14 162 220 66       | 74 448    | 0.87     | 0.6475392     | 2  | 0.97   | 0.56          | 1.68          | 0.73   | 0.36          | 1.49            |
| WHI      | 7    | 0.403 0.444 | 100 152 43 518 903 322    | 295 1743  | 3.60     | 0.165525      | 2  | 1.15   | 0.87          | 1.51          | 1.45   | 0.99          | 2.12            |
| STAGE3   | 23   | 0.409 0.402 | 182 265 85 570 782 256    | 532 1608  | 0.29     | 0.8655615     | 2  | 0.94   | 0.76          | 1.17          | 0.96   | 0.71          | 1.29            |
| NHS2     | 7    | 0.483 0.423 | 22 47 19 119 167 65       | 88 351    | 2.57     | 0.2760643     | 2  | 0.66   | 0.38          | 1.15          | 0.63   | 0.32          | 1.25            |
| PBCS2    | 16   | 0.397 0.386 | 122 171 51 266 333 105    | 344 704   | 0.62     | 0.7350815     | 2  | 0.89   | 0.67          | 1.19          | 0.94   | 0.63          | 1.40            |
| WHS      | 18   | 0.385 0.410 | 38 47 15 185 282 86       | 100 553   | 0.80     | 0.671202      | 2  | 1.23   | 0.77          | 1.96          | 1.18   | 0.61          | 2.26            |
| PBCS 1+2 | 18   | 0.386 0.380 | 196 261 75 407 496 153    | 532 1056  | 0.63     | 0.7293983     | 2  | 0.92   | 0.73          | 1.15          | 0.98   | 0.71          | 1.36            |

Locus Alleles Chr Location Neighborhood  
rs17740709 A|G 12q21.31 81947471 TMTC2

| SUBSET   | Rank | MAF         | Geno Counts              | Subjects  | score X2 | score p-value | df | het OR | het OR 95% CI | het OR 95% CI | hom OR | hom OR 95% CI | hom OR 95% CI_u |
|----------|------|-------------|--------------------------|-----------|----------|---------------|----|--------|---------------|---------------|--------|---------------|-----------------|
| STAGE1-3 | 13   | 0.209 0.219 | 828 417 65 3251 1707 300 | 1310 5258 | 1.49     | 0.4738534     | 2  | 1.04   | 0.91          | 1.19          | 1.18   | 0.89          | 1.55            |
| NHS      | 2    | 0.180 0.222 | 121 58 4 502 251 54      | 183 807   | 5.55     | 0.0623801     | 2  | 1.04   | 0.74          | 1.48          | 3.25   | 1.16          | 9.16            |
| STAGE1-2 | 19   | 0.210 0.216 | 494 249 40 2293 1165 209 | 783 3667  | 0.44     | 0.8044625     | 2  | 1.01   | 0.85          | 1.19          | 1.13   | 0.79          | 1.60            |
| STAGE2   | 18   | 0.219 0.214 | 373 191 36 1791 914 155  | 600 2860  | 0.32     | 0.8514827     | 2  | 1.00   | 0.82          | 1.21          | 0.90   | 0.61          | 1.31            |
| CPSII    | 6    | 0.131 0.199 | 32 9 1 205 96 15         | 42 316    | 2.19     | 0.3338227     | 2  | 1.67   | 0.76          | 3.63          | 2.34   | 0.30          | 18.34           |
| PBCS1    | 19   | 0.254 0.245 | 106 70 13 203 127 23     | 189 353   | 0.11     | 0.9483328     | 2  | 0.95   | 0.65          | 1.38          | 0.92   | 0.45          | 1.90            |
| PLCO     | 17   | 0.209 0.218 | 48 21 5 277 147 24       | 74 448    | 0.71     | 0.7026286     | 2  | 1.21   | 0.70          | 2.10          | 0.83   | 0.30          | 2.29            |
| WHI      | 22   | 0.212 0.209 | 187 91 17 1106 544 93    | 295 1743  | 0.10     | 0.9530862     | 2  | 1.01   | 0.77          | 1.33          | 0.93   | 0.54          | 1.59            |
| STAGE3   | 10   | 0.207 0.228 | 334 168 25 958 544 91    | 527 1593  | 1.97     | 0.3736279     | 2  | 1.13   | 0.91          | 1.40          | 1.27   | 0.80          | 2.01            |
| NHS2     | 19   | 0.206 0.211 | 55 25 5 214 112 16       | 85 342    | 0.49     | 0.7842419     | 2  | 1.15   | 0.68          | 1.95          | 0.82   | 0.29          | 2.34            |
| PBCS2    | 2    | 0.212 0.254 | 215 109 18 398 260 50    | 342 708   | 4.44     | 0.1083745     | 2  | 1.29   | 0.98          | 1.70          | 1.50   | 0.85          | 2.64            |
| WHS      | 15   | 0.190 0.204 | 64 34 2 346 172 25       | 100 543   | 1.51     | 0.4706761     | 2  | 0.94   | 0.59          | 1.47          | 2.31   | 0.53          | 10.00           |
| PBCS 1+2 | 8    | 0.227 0.251 | 321 179 31 601 385 73    | 531 1059  | 2.13     | 0.3439063     | 2  | 1.15   | 0.92          | 1.44          | 1.26   | 0.81          | 1.96            |

Locus Alleles Chr Location Neighborhood  
rs11077820 T|C 17q25.1 71966263 UBE2O,AANAT

| SUBSET   | Rank | MAF         | Geno Counts               | Subjects  | score X2 | score p-value | df | het OR | het OR 95% CI | het OR 95% CI | hom OR | hom OR 95% CI | hom OR 95% CI_u |
|----------|------|-------------|---------------------------|-----------|----------|---------------|----|--------|---------------|---------------|--------|---------------|-----------------|
| STAGE1-3 | 14   | 0.359 0.367 | 543 598 173 2153 2342 760 | 1314 5255 | 1.48     | 0.4759543     | 2  | 0.99   | 0.87          | 1.13          | 1.11   | 0.92          | 1.34            |
| NHS      | 19   | 0.374 0.374 | 73 83 27 329 353 125      | 183 807   | 0.17     | 0.918994      | 2  | 0.94   | 0.67          | 1.34          | 1.03   | 0.63          | 1.67            |
| STAGE1-2 | 11   | 0.361 0.368 | 318 364 101 1502 1623 538 | 783 3663  | 2.15     | 0.3420604     | 2  | 0.94   | 0.80          | 1.11          | 1.13   | 0.88          | 1.44            |
| STAGE2   | 9    | 0.357 0.367 | 245 281 74 1173 1270 413  | 600 2856  | 2.22     | 0.3299432     | 2  | 0.94   | 0.78          | 1.14          | 1.17   | 0.88          | 1.55            |
| CPSII    | 18   | 0.357 0.359 | 17 20 5 131 143 42        | 42 316    | 0.11     | 0.9472167     | 2  | 0.93   | 0.47          | 1.85          | 1.09   | 0.38          | 3.13            |
| PBCS1    | 7    | 0.381 0.334 | 74 86 29 160 150 43       | 189 353   | 2.27     | 0.3215621     | 2  | 0.81   | 0.55          | 1.18          | 0.69   | 0.40          | 1.18            |
| PLCO     | 20   | 0.358 0.354 | 30 35 9 188 200 58        | 74 446    | 0.16     | 0.9236333     | 2  | 0.91   | 0.54          | 1.54          | 1.03   | 0.46          | 2.29            |
| WHI      | 3    | 0.342 0.378 | 124 140 31 694 777 270    | 295 1741  | 5.01     | 0.0816925     | 2  | 0.99   | 0.76          | 1.29          | 1.56   | 1.02          | 2.36            |
| STAGE3   | 22   | 0.356 0.365 | 225 234 72 651 720 222    | 531 1593  | 0.37     | 0.8297748     | 2  | 1.06   | 0.86          | 1.31          | 1.07   | 0.78          | 1.45            |
| NHS2     | 3    | 0.337 0.373 | 43 32 14 136 163 48       | 89 347    | 3.54     | 0.170521      | 2  | 1.61   | 0.97          | 2.68          | 1.08   | 0.55          | 2.15            |
| PBCS2    | 15   | 0.366 0.382 | 141 153 49 269 335 102    | 343 706   | 0.94     | 0.6252447     | 2  | 1.15   | 0.87          | 1.52          | 1.09   | 0.73          | 1.62            |
| WHS      | 9    | 0.338 0.339 | 41 49 9 246 222 72        | 99 540    | 2.89     | 0.235282      | 2  | 0.76   | 0.48          | 1.19          | 1.33   | 0.62          | 2.87            |
| PBCS 1+2 | 20   | 0.371 0.366 | 215 239 78 429 484 145    | 532 1058  | 0.29     | 0.8671371     | 2  | 1.01   | 0.81          | 1.27          | 0.93   | 0.68          | 1.28            |

Locus Alleles Chr Location Neighborhood  
rs7121523 G|A 11p15.4 7556781 PPFIBP2

| SUBSET   | Rank | MAF         | Geno Counts              | Subjects  | score X2 | score p-value | df | het OR | het OR 95% CI | het OR 95% CI | hom OR | hom OR 95% CI | hom OR 95% CI_u |
|----------|------|-------------|--------------------------|-----------|----------|---------------|----|--------|---------------|---------------|--------|---------------|-----------------|
| STAGE1-3 | 15   | 0.162 0.161 | 925 353 36 3746 1354 170 | 1314 5270 | 1.42     | 0.4913632     | 2  | 0.95   | 0.83          | 1.09          | 1.17   | 0.81          | 1.68            |

|          |    |             |                         |          |      |           |   |      |      |      |      |      |       |
|----------|----|-------------|-------------------------|----------|------|-----------|---|------|------|------|------|------|-------|
| NHS      | 15 | 0.164 0.168 | 129 48 6 572 199 36     | 183 807  | 0.64 | 0.7253908 | 2 | 0.94 | 0.65 | 1.35 | 1.35 | 0.56 | 3.28  |
| STAGE1-2 | 4  | 0.176 0.161 | 533 223 26 2613 923 129 | 782 3665 | 3.74 | 0.1537875 | 2 | 0.84 | 0.71 | 1.00 | 1.01 | 0.66 | 1.56  |
| STAGE2   | 6  | 0.179 0.159 | 404 175 20 2041 724 93  | 599 2858 | 3.98 | 0.136395  | 2 | 0.82 | 0.67 | 1.00 | 0.92 | 0.56 | 1.51  |
| CPSII    | 8  | 0.183 0.171 | 29 9 3 220 84 12        | 41 316   | 1.38 | 0.50279   | 2 | 1.23 | 0.56 | 2.71 | 0.53 | 0.14 | 1.98  |
| PBCS1    | 1  | 0.148 0.156 | 134 54 1 259 76 17      | 189 352  | 9.45 | 0.0088682 | 2 | 0.73 | 0.49 | 1.09 | 8.80 | 1.16 | 66.80 |
| PLCO     | 2  | 0.230 0.160 | 41 32 1 318 117 13      | 74 448   | 9.34 | 0.0093884 | 2 | 0.47 | 0.28 | 0.78 | 1.68 | 0.21 | 13.15 |
| WHI      | 5  | 0.186 0.158 | 200 80 15 1244 447 51   | 295 1742 | 4.30 | 0.1167437 | 2 | 0.90 | 0.68 | 1.19 | 0.55 | 0.30 | 0.99  |
| STAGE3   | 8  | 0.141 0.160 | 392 130 10 1133 431 41  | 532 1605 | 2.19 | 0.3349858 | 2 | 1.15 | 0.91 | 1.44 | 1.42 | 0.70 | 2.86  |
| NHS2     | 20 | 0.154 0.153 | 65 24 2 254 88 10       | 91 352   | 0.17 | 0.9186397 | 2 | 0.94 | 0.55 | 1.59 | 1.28 | 0.27 | 5.98  |
| PBCS2    | 12 | 0.136 0.158 | 254 81 6 496 184 18     | 341 698  | 1.65 | 0.4384753 | 2 | 1.16 | 0.86 | 1.57 | 1.54 | 0.60 | 3.92  |
| WHS      | 19 | 0.145 0.167 | 73 25 2 383 159 13      | 100 555  | 0.64 | 0.7265944 | 2 | 1.21 | 0.74 | 1.98 | 1.24 | 0.27 | 5.61  |
| PBCS 1+2 | 2  | 0.141 0.157 | 388 135 7 755 260 35    | 530 1050 | 5.52 | 0.0632762 | 2 | 0.99 | 0.78 | 1.26 | 2.57 | 1.13 | 5.84  |

Locus Alleles Chr Location Neighborhood  
rs17570439 T|C 1p34.2 40096797 TRIT1

| SUBSET   | Rank | MAF         | Geno Counts              | Subjects  | score X2 | score p-value | df | het OR | het OR 95% CI | het OR 95% CI | hom OR | hom OR 95% CI | hom OR 95% CI_u |
|----------|------|-------------|--------------------------|-----------|----------|---------------|----|--------|---------------|---------------|--------|---------------|-----------------|
| STAGE1-3 | 16   | 0.231 0.224 | 769 476 65 3177 1825 269 | 1310 5271 | 1.35     | 0.5083239     | 2  | 0.93   | 0.82          | 1.05          | 1.00   | 0.76          | 1.33            |
| NHS      | 18   | 0.238 0.245 | 107 65 11 457 304 46     | 183 807   | 0.30     | 0.8611642     | 2  | 1.10   | 0.78          | 1.54          | 0.98   | 0.49          | 1.95            |
| STAGE1-2 | 8    | 0.234 0.228 | 453 292 37 2196 1270 201 | 782 3667  | 2.44     | 0.2956243     | 2  | 0.90   | 0.76          | 1.06          | 1.12   | 0.78          | 1.61            |
| STAGE2   | 3    | 0.233 0.223 | 346 227 26 1739 966 155  | 599 2860  | 4.30     | 0.1164981     | 2  | 0.85   | 0.70          | 1.02          | 1.19   | 0.77          | 1.83            |
| CPSII    | 5    | 0.262 0.201 | 22 18 2 203 99 14        | 42 316    | 2.35     | 0.3093954     | 2  | 0.60   | 0.31          | 1.16          | 0.76   | 0.16          | 3.56            |
| PBCS1    | 2    | 0.214 0.215 | 113 71 5 223 108 22      | 189 353   | 5.22     | 0.0736171     | 2  | 0.77   | 0.53          | 1.12          | 2.23   | 0.82          | 6.04            |
| PLCO     | 8    | 0.243 0.238 | 40 32 2 259 165 24       | 74 448    | 1.75     | 0.4174628     | 2  | 0.80   | 0.48          | 1.32          | 1.85   | 0.42          | 8.14            |
| WHI      | 18   | 0.238 0.225 | 171 106 17 1054 594 95   | 294 1743  | 0.56     | 0.7562711     | 2  | 0.91   | 0.74          | 1.18          | 0.91   | 0.53          | 1.56            |
| STAGE3   | 14   | 0.227 0.215 | 316 184 28 981 555 68    | 528 1604  | 1.12     | 0.5719789     | 2  | 0.97   | 0.79          | 1.20          | 0.78   | 0.49          | 1.24            |
| NHS2     | 17   | 0.236 0.232 | 53 30 6 201 125 17       | 89 343    | 0.58     | 0.7478005     | 2  | 1.10   | 0.67          | 1.81          | 0.75   | 0.28          | 1.99            |
| PBCS2    | 19   | 0.215 0.210 | 211 115 16 448 228 35    | 342 711   | 0.26     | 0.8762158     | 2  | 0.93   | 0.71          | 1.23          | 1.03   | 0.56          | 1.90            |
| WHS      | 7    | 0.263 0.213 | 52 39 6 332 202 16       | 97 550    | 3.51     | 0.1733184     | 2  | 0.81   | 0.52          | 1.27          | 0.42   | 0.16          | 1.12            |
| PBCS 1+2 | 5    | 0.215 0.211 | 324 186 21 671 336 57    | 531 1064  | 2.95     | 0.2287657     | 2  | 0.87   | 0.70          | 1.09          | 1.31   | 0.78          | 2.20            |

Locus Alleles Chr Location Neighborhood  
rs10850145 C|T 12q24.13 112428512

| SUBSET   | Rank | MAF         | Geno Counts              | Subjects  | score X2 | score p-value | df | het OR | het OR 95% CI | het OR 95% CI | hom OR | hom OR 95% CI | hom OR 95% CI_u |
|----------|------|-------------|--------------------------|-----------|----------|---------------|----|--------|---------------|---------------|--------|---------------|-----------------|
| STAGE1-3 | 17   | 0.108 0.109 | 1047 249 17 4185 1048 54 | 1313 5287 | 1.17     | 0.5570964     | 2  | 1.05   | 0.90          | 1.23          | 0.79   | 0.46          | 1.38            |
| NHS      | 6    | 0.117 0.108 | 145 33 5 642 155 10      | 183 807   | 2.31     | 0.3158402     | 2  | 1.06   | 0.70          | 1.61          | 0.45   | 0.15          | 1.34            |
| STAGE1-2 | 17   | 0.107 0.111 | 626 146 11 2898 724 43   | 783 3665  | 0.75     | 0.6863624     | 2  | 1.07   | 0.88          | 1.31          | 0.84   | 0.43          | 1.65            |
| STAGE2   | 15   | 0.104 0.111 | 481 113 6 2256 569 33    | 600 2858  | 0.49     | 0.782334      | 2  | 1.07   | 0.86          | 1.34          | 1.17   | 0.49          | 2.81            |
| CPSII    | 3    | 0.071 0.111 | 37 4 1 250 62 4          | 42 316    | 2.75     | 0.2524626     | 2  | 2.29   | 0.79          | 6.68          | 0.59   | 0.06          | 5.44            |
| PBCS1    | 11   | 0.101 0.123 | 152 36 1 270 79 4        | 189 353   | 1.38     | 0.5026115     | 2  | 1.24   | 0.79          | 1.92          | 2.25   | 0.25          | 20.33           |
| PLCO     | 22   | 0.122 0.106 | 56 18 0 357 87 4         | 74 448    |          |               |    |        |               |               |        |               |                 |
| WHI      | 21   | 0.107 0.110 | 236 55 4 1379 341 21     | 295 1741  | 0.18     | 0.9133754     | 2  | 1.06   | 0.77          | 1.46          | 0.90   | 0.31          | 2.64            |
| STAGE3   | 16   | 0.108 0.107 | 421 103 6 1289 324 11    | 530 1624  | 1.10     | 0.576665      | 2  | 1.03   | 0.80          | 1.32          | 0.60   | 0.22          | 1.63            |
| NHS2     | 6    | 0.136 0.100 | 68 16 4 290 59 6         | 88 355    | 2.82     | 0.2442824     | 2  | 0.86   | 0.47          | 1.60          | 0.35   | 0.10          | 1.28            |
| PBCS2    | 23   | 0.105 0.107 | 273 68 2 565 143 5       | 343 713   | 0.06     | 0.9711576     | 2  | 1.02   | 0.74          | 1.40          | 1.21   | 0.23          | 6.27            |
| WHS      | 24   | 0.096 0.110 | 80 19 0 434 122 0        | 99 556    |          |               |    |        |               |               |        |               |                 |
| PBCS 1+2 | 15   | 0.103 0.113 | 425 104 3 833 222 9      | 532 1064  | 0.79     | 0.6735189     | 2  | 1.09   | 0.84          | 1.41          | 1.53   | 0.41          | 5.68            |

Locus Alleles Chr Location Neighborhood  
rs37936 A|G 7q21.11 79806994

| SUBSET   | Rank | MAF         | Geno Counts               | Subjects  | score X2 | score p-value | df | het OR | het OR 95% CI | het OR 95% CI | hom OR | hom OR 95% CI | hom OR 95% CI_u |
|----------|------|-------------|---------------------------|-----------|----------|---------------|----|--------|---------------|---------------|--------|---------------|-----------------|
| STAGE1-3 | 18   | 0.370 0.367 | 521 572 187 2078 2378 707 | 1280 5163 | 1.09     | 0.5787631     | 2  | 1.04   | 0.91          | 1.19          | 0.95   | 0.79          | 1.14            |
| NHS      | 11   | 0.369 0.362 | 77 68 31 333 343 115      | 176 791   | 1.75     | 0.4166609     | 2  | 1.17   | 0.81          | 1.67          | 0.86   | 0.54          | 1.37            |
| STAGE1-2 | 14   | 0.374 0.363 | 233 255 88 1325 1468 438  | 576 3231  | 1.23     | 0.5400573     | 2  | 1.01   | 0.84          | 1.23          | 0.88   | 0.67          | 1.14            |
| STAGE2   | 14   | 0.376 0.363 | 156 187 57 992 1125 323   | 400 2440  | 0.53     | 0.7683314     | 2  | 0.95   | 0.75          | 1.19          | 0.89   | 0.64          | 1.24            |



|          |    |             |                       |          |      |           |   |      |      |      |      |      |      |
|----------|----|-------------|-----------------------|----------|------|-----------|---|------|------|------|------|------|------|
| NHS2     | 13 | 0.278 0.286 | 48 31 9 179 142 29    | 88 350   | 0.97 | 0.6153598 | 2 | 1.23 | 0.74 | 2.03 | 0.86 | 0.38 | 1.95 |
| PBCS2    | 11 | 0.244 0.265 | 198 121 23 381 280 48 | 342 709  | 1.75 | 0.417508  | 2 | 1.20 | 0.91 | 1.58 | 1.08 | 0.64 | 1.84 |
| WHS      | 10 | 0.283 0.271 | 48 46 5 29 214 43     | 99 554   | 2.55 | 0.2790198 | 2 | 0.75 | 0.48 | 1.17 | 1.39 | 0.52 | 3.68 |
| PBCS 1+2 | 12 | 0.245 0.265 | 303 191 34 579 403 80 | 528 1062 | 1.41 | 0.4947511 | 2 | 1.10 | 0.89 | 1.38 | 1.23 | 0.81 | 1.88 |

Locus Alleles Chr Location Neighborhood  
rs3134615 G|T 1p34.2 40134653 TRIT1,MYCL1

| SUBSET   | Rank | MAF         | Geno Counts              | Subjects  | score X2 | score p-value | df | het OR | het OR 95% CI | het OR 95% CI | hom OR | hom OR 95% CI | hom OR 95% CI_u |
|----------|------|-------------|--------------------------|-----------|----------|---------------|----|--------|---------------|---------------|--------|---------------|-----------------|
| STAGE1-3 | 22   | 0.249 0.243 | 734 499 77 3003 1970 297 | 1310 5270 | 0.42     | 0.811853      | 2  | 0.97   | 0.85          | 1.10          | 0.94   | 0.72          | 1.23            |
| NHS      | 16   | 0.260 0.262 | 101 69 13 433 325 49     | 183 807   | 0.57     | 0.7535155     | 2  | 1.10   | 0.78          | 1.54          | 0.88   | 0.46          | 1.68            |
| STAGE1-2 | 15   | 0.255 0.247 | 428 310 45 2072 1377 218 | 783 3667  | 1.14     | 0.565246      | 2  | 0.92   | 0.78          | 1.08          | 1.00   | 0.71          | 1.40            |
| STAGE2   | 7    | 0.254 0.243 | 327 241 32 1639 1052 169 | 600 2860  | 2.49     | 0.2878889     | 2  | 0.87   | 0.72          | 1.05          | 1.05   | 0.71          | 1.57            |
| CPSII    | 11   | 0.250 0.222 | 23 17 2 193 106 17       | 42 316    | 0.79     | 0.6736434     | 2  | 0.74   | 0.38          | 1.45          | 1.01   | 0.22          | 4.67            |
| PBCS1    | 3    | 0.235 0.231 | 106 77 6 213 117 23      | 189 353   | 4.93     | 0.084963      | 2  | 0.76   | 0.52          | 1.09          | 1.91   | 0.75          | 4.83            |
| PLCO     | 13   | 0.264 0.253 | 38 33 3 247 175 26       | 74 448    | 1.00     | 0.6052829     | 2  | 0.82   | 0.49          | 1.35          | 1.33   | 0.38          | 4.62            |
| WHI      | 16   | 0.264 0.247 | 160 114 21 986 654 103   | 295 1743  | 0.93     | 0.626649      | 2  | 0.93   | 0.72          | 1.21          | 0.80   | 0.48          | 1.31            |
| STAGE3   | 17   | 0.241 0.235 | 306 190 32 931 595 80    | 528 1606  | 1.00     | 0.6052663     | 2  | 1.03   | 0.84          | 1.27          | 0.82   | 0.53          | 1.26            |
| NHS2     | 8    | 0.230 0.244 | 54 26 7 196 131 19       | 87 346    | 2.33     | 0.3120306     | 2  | 1.39   | 0.83          | 2.33          | 0.75   | 0.30          | 1.87            |
| PBCS2    | 17   | 0.230 0.225 | 202 124 17 427 240 39    | 343 706   | 0.55     | 0.7609846     | 2  | 0.92   | 0.70          | 1.20          | 1.09   | 0.60          | 1.97            |
| WHS      | 8    | 0.286 0.242 | 50 40 8 308 224 22       | 98 554    | 3.50     | 0.1736943     | 2  | 0.91   | 0.58          | 1.43          | 0.45   | 0.19          | 1.06            |
| PBCS 1+2 | 4    | 0.232 0.226 | 308 200 23 640 355 61    | 531 1056  | 3.45     | 0.1782114     | 2  | 0.85   | 0.69          | 1.06          | 1.28   | 0.78          | 2.10            |

Locus Alleles Chr Location Neighborhood  
rs2303659 G|A 11q24.3 129326474 PRDM10

| SUBSET   | Rank | MAF         | Geno Counts          | Subjects  | score X2 | score p-value | df | het OR | het OR 95% CI | het OR 95% CI | hom OR | hom OR 95% CI | hom OR 95% CI_u |
|----------|------|-------------|----------------------|-----------|----------|---------------|----|--------|---------------|---------------|--------|---------------|-----------------|
| STAGE1-3 | 23   | 0.024 0.026 | 1251 59 2 4997 257 9 | 1312 5263 | 0.37     | 0.8329134     | 2  | 1.09   | 0.82          | 1.46          | 1.13   | 0.24          | 5.22            |
| NHS      | 22   | 0.022 0.026 | 175 8 0 765 42 0     | 183 807   |          |               |    |        |               |               |        |               |                 |
| STAGE1-2 | 23   | 0.022 0.025 | 749 34 0 3487 178 2  | 783 3667  |          |               |    |        |               |               |        |               |                 |
| STAGE2   | 23   | 0.022 0.024 | 574 26 0 2722 136 2  | 600 2860  |          |               |    |        |               |               |        |               |                 |
| CPSII    | 22   | 0.000 0.019 | 42 0 0 305 10 1      | 42 316    |          |               |    |        |               |               |        |               |                 |
| PBCS1    | 22   | 0.021 0.024 | 181 8 0 336 17 0     | 189 353   |          |               |    |        |               |               |        |               |                 |
| PLCO     | 24   | 0.020 0.026 | 71 3 0 425 23 0      | 74 448    |          |               |    |        |               |               |        |               |                 |
| WHI      | 24   | 0.025 0.025 | 280 15 0 1656 86 1   | 295 1743  |          |               |    |        |               |               |        |               |                 |
| STAGE3   | 24   | 0.027 0.029 | 502 25 2 1511 79 7   | 529 1597  | 0.08     | 0.9622211     | 2  | 1.05   | 0.66          | 1.66          | 1.16   | 0.24          | 5.62            |
| NHS2     | 24   | 0.000 0.030 | 88 0 0 334 15 3      | 88 352    |          |               |    |        |               |               |        |               |                 |
| PBCS2    | 24   | 0.033 0.028 | 322 21 1 669 40 0    | 344 709   |          |               |    |        |               |               |        |               |                 |
| WHS      | 21   | 0.031 0.030 | 92 4 1 508 24 4      | 97 536    | 0.11     | 0.947642      | 2  | 1.09   | 0.37          | 3.20          | 0.72   | 0.08          | 6.55            |
| PBCS 1+2 | 24   | 0.029 0.027 | 503 29 1 1004 57 0   | 533 1061  |          |               |    |        |               |               |        |               |                 |

Locus Alleles Chr Location Neighborhood  
rs4666451 G|A 2p24.1 19150424

| SUBSET   | Rank | MAF         | Geno Counts               | Subjects  | score X2 | score p-value | df | het OR | het OR 95% CI | het OR 95% CI | hom OR | hom OR 95% CI | hom OR 95% CI_u |
|----------|------|-------------|---------------------------|-----------|----------|---------------|----|--------|---------------|---------------|--------|---------------|-----------------|
| STAGE1-3 | 24   | 0.385 0.386 | 428 533 168 1679 2133 657 | 1129 4469 | 0.10     | 0.9520765     | 2  | 1.02   | 0.88          | 1.18          | 1.00   | 0.82          | 1.22            |
| STAGE1-2 | 10   | 0.361 0.384 | 245 277 78 1078 1366 416  | 600 2860  | 2.38     | 0.3049464     | 2  | 1.12   | 0.93          | 1.35          | 1.21   | 0.92          | 1.60            |
| STAGE2   | 8    | 0.361 0.384 | 245 277 78 1078 1366 416  | 600 2860  | 2.38     | 0.3049464     | 2  | 1.12   | 0.93          | 1.35          | 1.21   | 0.92          | 1.60            |
| CPSII    | 2    | 0.369 0.413 | 18 17 7 96 179 41         | 42 316    | 3.96     | 0.1380846     | 2  | 1.97   | 0.97          | 4.01          | 1.10   | 0.43          | 2.83            |
| PBCS1    | 6    | 0.384 0.375 | 67 99 23 140 161 52       | 189 353   | 2.33     | 0.3116446     | 2  | 0.78   | 0.53          | 1.14          | 1.08   | 0.61          | 1.91            |
| PLCO     | 6    | 0.338 0.394 | 30 38 6 170 203 75        | 74 448    | 3.66     | 0.1601322     | 2  | 0.94   | 0.56          | 1.59          | 2.21   | 0.88          | 5.52            |
| WHI      | 6    | 0.351 0.378 | 130 123 42 672 823 248    | 295 1743  | 3.61     | 0.1647454     | 2  | 1.29   | 0.99          | 1.69          | 1.14   | 0.78          | 1.67            |
| STAGE3   | 11   | 0.412 0.388 | 183 257 90 601 769 241    | 530 1611  | 1.94     | 0.3787062     | 2  | 0.91   | 0.73          | 1.13          | 0.82   | 0.61          | 1.09            |
| NHS2     | 1    | 0.439 0.369 | 33 35 22 134 171 43       | 90 348    | 8.70     | 0.0128981     | 2  | 1.20   | 0.71          | 2.04          | 0.48   | 0.25          | 0.91            |
| PBCS2    | 4    | 0.411 0.398 | 111 181 50 263 330 118    | 342 711   | 3.92     | 0.1409327     | 2  | 0.77   | 0.58          | 1.02          | 1.00   | 0.67          | 1.48            |
| WHS      | 13   | 0.393 0.388 | 39 41 18 204 268 80       | 98 552    | 1.80     | 0.4071124     | 2  | 1.25   | 0.78          | 2.01          | 0.85   | 0.46          | 1.57            |
| PBCS 1+2 | 1    | 0.401 0.390 | 178 279 73 403 489 170    | 530 1062  | 6.19     | 0.0453098     | 2  | 0.77   | 0.62          | 0.97          | 1.03   | 0.74          | 1.43            |

unadj\_trend

| Locus      | Alleles | Chr         | Location                   | Neighborhood |           |               |    |        |               |               |        |               |                 |      |  |  |  |
|------------|---------|-------------|----------------------------|--------------|-----------|---------------|----|--------|---------------|---------------|--------|---------------|-----------------|------|--|--|--|
| rs11249433 | T C     | 1p11.2      |                            | 120982136    | LOC647121 |               |    |        |               |               |        |               |                 |      |  |  |  |
| SUBSET     | Rank    | MAF         | Geno Counts                | Subjects     | score X2  | score p-value | df | het OR | het OR 95% CI | het OR 95% CI | hom OR | hom OR 95% CI | hom OR 95% CI_u |      |  |  |  |
| STAGE1-3   | 1       | 0.399 0.439 | 478 610 215 1655 2556 1017 | 1303 5228    | 13.39     | 2.53E-04      | 1  | 1.18   | 1.08          | 1.28          | 1.38   | 1.38          | 1.16            | 1.65 |  |  |  |
| NHS        | 3       | 0.412 0.448 | 65 84 33 238 411 155       | 182 804      | 1.61      | 0.2038633     | 1  | 1.16   | 0.92          | 1.47          | 1.35   | 1.35          | 0.85            | 2.16 |  |  |  |
| STAGE1-2   | 1       | 0.407 0.441 | 271 383 126 1124 1831 695  | 780 3650     | 6.21      | 0.0126829     | 1  | 1.15   | 1.03          | 1.29          | 1.33   | 1.29          | 1.06            | 1.66 |  |  |  |
| STAGE2     | 1       | 0.406 0.439 | 206 299 93 886 1420 540    | 598 2846     | 4.65      | 0.03114       | 1  | 1.15   | 1.01          | 1.31          | 1.32   | 1.32          | 1.03            | 1.71 |  |  |  |
| CPSII      | 1       | 0.524 0.405 | 8 24 10 108 159 48         | 42 315       | 4.56      | 0.0327818     | 1  | 0.60   | 0.37          | 0.96          | 0.36   | 0.36          | 0.14            | 0.93 |  |  |  |
| PBCS1      | 9       | 0.392 0.407 | 67 96 26 124 171 58        | 189 353      | 0.24      | 0.6271678     | 1  | 1.07   | 0.82          | 1.38          | 1.14   | 1.14          | 0.68            | 1.91 |  |  |  |
| PLCO       | 15      | 0.411 0.427 | 26 34 13 140 232 75        | 73 447       | 0.14      | 0.7046061     | 1  | 1.07   | 0.75          | 1.54          | 1.15   | 1.15          | 0.56            | 2.38 |  |  |  |
| WHI        | 1       | 0.396 0.455 | 105 145 44 514 858 359     | 294 1731     | 7.09      | 0.0077679     | 1  | 1.27   | 1.07          | 1.52          | 1.62   | 1.62          | 1.14            | 2.32 |  |  |  |
| STAGE3     | 1       | 0.387 0.434 | 207 227 89 531 725 322     | 523 1578     | 6.52      | 0.0106382     | 1  | 1.20   | 1.04          | 1.38          | 1.43   | 1.43          | 1.09            | 1.89 |  |  |  |
| NHS2       | 18      | 0.450 0.440 | 29 41 20 114 152 73        | 90 339       | 0.06      | 0.8094536     | 1  | 0.96   | 0.70          | 1.32          | 0.93   | 0.93          | 0.49            | 1.74 |  |  |  |
| PBCS2      | 6       | 0.372 0.410 | 137 149 51 246 324 121     | 337 691      | 2.51      | 0.1129798     | 1  | 1.16   | 0.96          | 1.40          | 1.35   | 1.35          | 0.93            | 1.96 |  |  |  |
| WHS        | 3       | 0.380 0.461 | 41 37 18 171 249 128       | 96 548       | 3.89      | 0.0486311     | 1  | 1.35   | 1.00          | 1.83          | 1.83   | 1.83          | 1.00            | 3.34 |  |  |  |
| PBCS 1+2   | 2       | 0.379 0.409 | 204 245 77 370 495 179     | 526 1044     | 2.45      | 0.1172055     | 1  | 1.13   | 0.97          | 1.31          | 1.27   | 1.27          | 0.94            | 1.72 |  |  |  |

| Locus     | Alleles | Chr         | Location                 | Neighborhood |          |               |    |        |               |               |        |               |                 |      |  |  |
|-----------|---------|-------------|--------------------------|--------------|----------|---------------|----|--------|---------------|---------------|--------|---------------|-----------------|------|--|--|
| rs7716600 | C A     | 5p12        |                          | 44910762     |          |               |    |        |               |               |        |               |                 |      |  |  |
| SUBSET    | Rank    | MAF         | Geno Counts              | Subjects     | score X2 | score p-value | df | het OR | het OR 95% CI | het OR 95% CI | hom OR | hom OR 95% CI | hom OR 95% CI_u |      |  |  |
| STAGE1-3  | 2       | 0.221 0.243 | 800 446 67 3042 1901 333 | 1313 5276    | 5.69     | 0.0170562     | 1  | 1.13   | 1.02          | 1.25          | 1.28   | 1.28          | 1.04            | 1.57 |  |  |
| NHS       | 14      | 0.246 0.253 | 108 60 15 451 303 53     | 183 807      | 0.09     | 0.768301      | 1  | 1.04   | 0.80          | 1.35          | 1.08   | 1.08          | 0.64            | 1.82 |  |  |
| STAGE1-2  | 3       | 0.227 0.249 | 473 265 45 2095 1316 253 | 783 3664     | 3.24     | 0.0720145     | 1  | 1.12   | 0.99          | 1.28          | 1.26   | 1.26          | 0.98            | 1.63 |  |  |
| STAGE2    | 3       | 0.221 0.247 | 365 205 30 1644 1013 200 | 600 2857     | 3.63     | 0.0568978     | 1  | 1.15   | 1.00          | 1.33          | 1.33   | 1.33          | 0.99            | 1.78 |  |  |
| CPSII     | 17      | 0.226 0.241 | 26 13 3 186 108 22       | 42 316       | 0.08     | 0.7798982     | 1  | 1.08   | 0.64          | 1.82          | 1.16   | 1.16          | 0.41            | 3.32 |  |  |
| PBCS1     | 22      | 0.272 0.272 | 99 77 13 186 139 26      | 189 351      | 0.00     | 0.9885096     | 1  | 1.00   | 0.75          | 1.32          | 1.00   | 1.00          | 0.57            | 1.75 |  |  |
| PLCO      | 2       | 0.169 0.232 | 52 19 3 261 166 21       | 74 448       | 2.99     | 0.0835335     | 1  | 1.50   | 0.94          | 2.39          | 2.25   | 2.25          | 0.89            | 5.69 |  |  |
| WHI       | 2       | 0.200 0.247 | 188 96 11 1011 600 131   | 295 1742     | 5.83     | 0.0157414     | 1  | 1.29   | 1.05          | 1.60          | 1.68   | 1.68          | 1.10            | 2.55 |  |  |
| STAGE3    | 10      | 0.212 0.231 | 327 181 22 948 587 79    | 530 1614     | 1.60     | 0.2055755     | 1  | 1.12   | 0.94          | 1.32          | 1.25   | 1.25          | 0.89            | 1.75 |  |  |
| NHS2      | 9       | 0.261 0.232 | 49 35 6 205 131 16       | 90 352       | 0.72     | 0.3965445     | 1  | 0.85   | 0.58          | 1.24          | 0.72   | 0.72          | 0.33            | 1.55 |  |  |
| PBCS2     | 3       | 0.195 0.233 | 219 111 11 417 254 38    | 341 709      | 3.85     | 0.0496455     | 1  | 1.26   | 1.00          | 1.58          | 1.58   | 1.58          | 1.00            | 2.49 |  |  |
| WHS       | 23      | 0.227 0.228 | 59 35 5 326 202 25       | 99 553       | 0.00     | 0.9855727     | 1  | 1.00   | 0.70          | 1.45          | 1.01   | 1.01          | 0.48            | 2.10 |  |  |
| PBCS 1+2  | 3       | 0.223 0.246 | 318 188 24 602 391 65    | 530 1058     | 2.17     | 0.1405657     | 1  | 1.14   | 0.96          | 1.36          | 1.30   | 1.30          | 0.92            | 1.85 |  |  |

| Locus     | Alleles | Chr         | Location                  | Neighborhood |          |               |    |        |               |               |        |               |                 |      |  |  |  |
|-----------|---------|-------------|---------------------------|--------------|----------|---------------|----|--------|---------------|---------------|--------|---------------|-----------------|------|--|--|--|
| rs9491859 | C A     | 6q22.33     |                           | 128106056    | C6orf190 |               |    |        |               |               |        |               |                 |      |  |  |  |
| SUBSET    | Rank    | MAF         | Geno Counts               | Subjects     | score X2 | score p-value | df | het OR | het OR 95% CI | het OR 95% CI | hom OR | hom OR 95% CI | hom OR 95% CI_u |      |  |  |  |
| STAGE1-3  | 3       | 0.357 0.376 | 534 613 160 2089 2392 784 | 1307 5265    | 3.21     | 0.0729782     | 1  | 1.08   | 0.99          | 1.18          | 1.18   | 1.18          | 0.99            | 1.40 |  |  |  |
| NHS       | 9       | 0.388 0.375 | 67 90 26 325 359 123      | 183 807      | 0.21     | 0.6454652     | 1  | 0.95   | 0.75          | 1.19          | 0.90   | 0.90          | 0.57            | 1.42 |  |  |  |
| STAGE1-2  | 17      | 0.372 0.376 | 308 368 107 1462 1649 555 | 783 3666     | 0.12     | 0.7344567     | 1  | 1.02   | 0.91          | 1.14          | 1.04   | 1.04          | 0.83            | 1.30 |  |  |  |
| STAGE2    | 12      | 0.367 0.377 | 241 278 81 1137 1290 432  | 600 2859     | 0.41     | 0.5205098     | 1  | 1.04   | 0.92          | 1.18          | 1.09   | 1.09          | 0.84            | 1.40 |  |  |  |
| CPSII     | 4       | 0.274 0.351 | 19 23 0 137 136 43        | 42 316       | 1.95     | 0.1625855     | 1  | 1.43   | 0.86          | 2.37          | 2.05   | 2.05          | 0.75            | 5.63 |  |  |  |
| PBCS1     | 15      | 0.354 0.364 | 83 78 28 147 154 51       | 189 352      | 0.08     | 0.7728884     | 1  | 1.04   | 0.81          | 1.34          | 1.08   | 1.08          | 0.65            | 1.78 |  |  |  |
| PLCO      | 23      | 0.378 0.376 | 29 34 11 170 219 59       | 74 448       | 0.00     | 0.9573337     | 1  | 0.99   | 0.69          | 1.43          | 0.98   | 0.98          | 0.47            | 2.03 |  |  |  |
| WHI       | 22      | 0.385 0.384 | 110 143 42 683 781 279    | 295 1743     | 0.00     | 0.9769745     | 1  | 1.00   | 0.84          | 1.19          | 0.99   | 0.99          | 0.70            | 1.41 |  |  |  |
| STAGE3    | 2       | 0.335 0.375 | 226 245 53 628 743 229    | 524 1600     | 5.57     | 0.0182593     | 1  | 1.19   | 1.03          | 1.38          | 1.43   | 1.43          | 1.06            | 1.91 |  |  |  |
| NHS2      | 15      | 0.349 0.366 | 36 40 10 147 152 53       | 86 352       | 0.18     | 0.674142      | 1  | 1.08   | 0.77          | 1.51          | 1.16   | 1.16          | 0.59            | 2.29 |  |  |  |
| PBCS2     | 7       | 0.335 0.365 | 146 160 34 286 322 96     | 340 704      | 1.79     | 0.1813084     | 1  | 1.14   | 0.94          | 1.38          | 1.30   | 1.30          | 0.88            | 1.92 |  |  |  |
| WHS       | 4       | 0.321 0.394 | 44 45 9 195 269 80        | 98 544       | 3.87     | 0.0492851     | 1  | 1.39   | 1.00          | 1.94          | 1.93   | 1.93          | 1.00            | 3.75 |  |  |  |
| PBCS 1+2  | 5       | 0.342 0.365 | 229 238 62 432 476 147    | 529 1055     | 1.56     | 0.2113033     | 1  | 1.10   | 0.95          | 1.29          | 1.22   | 1.22          | 0.89            | 1.65 |  |  |  |

Locus Alleles Chr Location Neighborhood

| rs12622050 | G A  | 2q11.2      | 100945886                | NPAS2     |          |               |    |        |               |               |        |               |               |                 |  |
|------------|------|-------------|--------------------------|-----------|----------|---------------|----|--------|---------------|---------------|--------|---------------|---------------|-----------------|--|
| SUBSET     | Rank | MAF         | Geno Counts              | Subjects  | score X2 | score p-value | df | het OR | het OR 95% CI | het OR 95% CI | hom OR | hom OR 95% CI | hom OR 95% CI | hom OR 95% CI_u |  |
| STAGE1-3   | 4    | 0.223 0.208 | 795 444 70 3307 1695 246 | 1309 5248 | 2.66     | 0.1027384     | 1  | 0.92   | 0.83          | 1.02          | 0.84   | 0.69          | 1.03          |                 |  |
| NHS        | 19   | 0.191 0.189 | 122 52 9 529 251 27      | 183 807   | 0.01     | 0.9198816     | 1  | 0.99   | 0.74          | 1.31          | 0.97   | 0.55          | 1.73          |                 |  |
| STAGE1-2   | 23   | 0.200 0.200 | 504 243 35 2361 1141 162 | 782 3664  | 0.00     | 0.9851776     | 1  | 1.00   | 0.87          | 1.14          | 1.00   | 0.76          | 1.31          |                 |  |
| STAGE2     | 23   | 0.203 0.203 | 382 191 26 1832 890 135  | 599 2857  | 0.00     | 0.9894318     | 1  | 1.00   | 0.86          | 1.17          | 1.00   | 0.74          | 1.36          |                 |  |
| CPSII      | 5    | 0.146 0.213 | 29 12 0 201 94 20        | 41 315    | 1.80     | 0.1792826     | 1  | 1.53   | 0.82          | 2.84          | 2.33   | 0.67          | 8.08          |                 |  |
| PBCS1      | 5    | 0.222 0.249 | 114 66 9 204 121 27      | 189 352   | 0.89     | 0.344647      | 1  | 1.15   | 0.86          | 1.54          | 1.32   | 0.74          | 2.36          |                 |  |
| PLCO       | 20   | 0.203 0.195 | 47 24 3 288 145 15       | 74 448    | 0.05     | 0.8317723     | 1  | 0.95   | 0.61          | 1.48          | 0.91   | 0.38          | 2.19          |                 |  |
| WHI        | 18   | 0.198 0.194 | 192 89 14 1139 530 73    | 295 1742  | 0.06     | 0.8111826     | 1  | 0.97   | 0.79          | 1.21          | 0.95   | 0.62          | 1.46          |                 |  |
| STAGE3     | 4    | 0.257 0.227 | 291 201 35 947 555 83    | 527 1585  | 3.86     | 0.049454      | 1  | 0.85   | 0.72          | 1.00          | 0.72   | 0.52          | 1.00          |                 |  |
| NHS2       | 17   | 0.206 0.215 | 53 29 3 210 117 15       | 85 342    | 0.07     | 0.7949841     | 1  | 1.06   | 0.70          | 1.61          | 1.12   | 0.48          | 2.58          |                 |  |
| PBCS2      | 5    | 0.278 0.245 | 177 141 25 402 254 45    | 343 701   | 2.62     | 0.1053411     | 1  | 0.84   | 0.69          | 1.04          | 0.71   | 0.47          | 1.07          |                 |  |
| WHS        | 17   | 0.227 0.212 | 61 31 7 335 184 23       | 99 542    | 0.23     | 0.6349787     | 1  | 0.92   | 0.64          | 1.32          | 0.84   | 0.41          | 1.73          |                 |  |
| PBCS 1+2   | 13   | 0.258 0.247 | 291 207 34 605 374 73    | 532 1052  | 0.47     | 0.4932279     | 1  | 0.94   | 0.80          | 1.11          | 0.89   | 0.64          | 1.24          |                 |  |

Locus Alleles Chr Location Neighborhood  
rs7936636 C|T 11p11.2 44397546

| SUBSET   | Rank | MAF         | Geno Counts              | Subjects  | score X2 | score p-value | df | het OR | het OR 95% CI | het OR 95% CI | hom OR | hom OR 95% CI | hom OR 95% CI_u |
|----------|------|-------------|--------------------------|-----------|----------|---------------|----|--------|---------------|---------------|--------|---------------|-----------------|
| STAGE1-3 | 5    | 0.234 0.249 | 773 464 75 2989 1934 347 | 1312 5270 | 2.62     | 0.105839      | 1  | 1.09   | 0.98          | 1.20          | 1.18   | 0.97          | 1.44            |
| NHS      | 5    | 0.219 0.247 | 110 66 7 470 276 61      | 183 807   | 1.21     | 0.2713948     | 1  | 1.16   | 0.89          | 1.51          | 1.35   | 0.79          | 2.29            |
| STAGE1-2 | 5    | 0.226 0.245 | 474 264 45 2117 1303 246 | 783 3666  | 2.39     | 0.1222858     | 1  | 1.11   | 0.97          | 1.26          | 1.22   | 0.95          | 1.58            |
| STAGE2   | 7    | 0.228 0.244 | 364 198 38 1647 1027 185 | 600 2859  | 1.34     | 0.24734       | 1  | 1.09   | 0.94          | 1.26          | 1.19   | 0.89          | 1.59            |
| CPSII    | 9    | 0.274 0.222 | 23 15 4 197 98 21        | 42 316    | 1.05     | 0.3064476     | 1  | 0.78   | 0.48          | 1.26          | 0.60   | 0.23          | 1.60            |
| PBCS1    | 19   | 0.228 0.229 | 115 62 12 212 119 21     | 189 352   | 0.00     | 0.9656885     | 1  | 1.01   | 0.75          | 1.35          | 1.01   | 0.57          | 1.81            |
| PLCO     | 18   | 0.243 0.253 | 45 22 7 254 161 33       | 74 448    | 0.06     | 0.7997809     | 1  | 1.05   | 0.71          | 1.56          | 1.11   | 0.51          | 2.42            |
| WHI      | 7    | 0.219 0.249 | 181 99 15 984 649 110    | 295 1743  | 2.54     | 0.1107957     | 1  | 1.19   | 0.96          | 1.46          | 1.41   | 0.92          | 2.14            |
| STAGE3   | 12   | 0.246 0.259 | 299 200 30 872 631 100   | 529 1603  | 0.77     | 0.3787901     | 1  | 1.08   | 0.91          | 1.27          | 1.16   | 0.84          | 1.60            |
| NHS2     | 19   | 0.233 0.241 | 51 33 4 204 123 23       | 88 350    | 0.05     | 0.8159587     | 1  | 1.05   | 0.71          | 1.54          | 1.10   | 0.51          | 2.37            |
| PBCS2    | 20   | 0.265 0.268 | 185 133 24 372 282 47    | 342 701   | 0.03     | 0.8615618     | 1  | 1.02   | 0.83          | 1.26          | 1.04   | 0.68          | 1.58            |
| WHS      | 1    | 0.192 0.259 | 63 34 2 296 226 30       | 99 552    | 4.35     | 0.0371067     | 1  | 1.51   | 1.02          | 2.24          | 2.29   | 1.05          | 5.01            |
| PBCS 1+2 | 20   | 0.251 0.256 | 300 195 36 584 401 69    | 531 1054  | 0.07     | 0.7947711     | 1  | 1.02   | 0.86          | 1.21          | 1.05   | 0.75          | 1.47            |

Locus Alleles Chr Location Neighborhood  
rs999737 C|T 14q24.1 68104435 RAD51L1

| SUBSET   | Rank | MAF         | Geno Counts              | Subjects  | score X2 | score p-value | df | het OR | het OR 95% CI | het OR 95% CI | hom OR | hom OR 95% CI | hom OR 95% CI_u |
|----------|------|-------------|--------------------------|-----------|----------|---------------|----|--------|---------------|---------------|--------|---------------|-----------------|
| STAGE1-3 | 6    | 0.229 0.216 | 773 472 64 3232 1803 234 | 1309 5269 | 2.33     | 0.1268253     | 1  | 0.92   | 0.83          | 1.02          | 0.85   | 0.69          | 1.05            |
| NHS      | 4    | 0.239 0.209 | 105 67 10 499 278 30     | 182 807   | 1.60     | 0.2064646     | 1  | 0.84   | 0.64          | 1.10          | 0.70   | 0.41          | 1.22            |
| STAGE1-2 | 8    | 0.224 0.211 | 469 275 38 2274 1237 156 | 782 3667  | 1.36     | 0.2440733     | 1  | 0.92   | 0.81          | 1.06          | 0.85   | 0.66          | 1.11            |
| STAGE2   | 13   | 0.220 0.212 | 364 208 28 1775 959 126  | 600 2860  | 0.41     | 0.5227958     | 1  | 0.95   | 0.82          | 1.11          | 0.91   | 0.67          | 1.23            |
| CPSII    | 20   | 0.214 0.223 | 27 12 3 193 105 18       | 42 316    | 0.03     | 0.8588138     | 1  | 1.05   | 0.61          | 1.80          | 1.10   | 0.37          | 3.25            |
| PBCS1    | 4    | 0.228 0.203 | 115 62 12 219 125 9      | 189 353   | 0.95     | 0.3285901     | 1  | 0.86   | 0.63          | 1.17          | 0.74   | 0.40          | 1.36            |
| PLCO     | 8    | 0.189 0.225 | 48 24 2 262 170 16       | 74 448    | 1.06     | 0.3035114     | 1  | 1.27   | 0.80          | 2.01          | 1.62   | 0.65          | 4.04            |
| WHI      | 14   | 0.224 0.208 | 174 110 11 1101 559 83   | 295 1743  | 0.75     | 0.387869      | 1  | 0.91   | 0.74          | 1.12          | 0.83   | 0.55          | 1.26            |
| STAGE3   | 15   | 0.236 0.225 | 305 197 26 959 567 78    | 528 1604  | 0.50     | 0.479805      | 1  | 0.94   | 0.80          | 1.11          | 0.89   | 0.64          | 1.24            |
| NHS2     | 10   | 0.208 0.234 | 55 31 3 205 120 21       | 89 346    | 0.54     | 0.4608853     | 1  | 1.16   | 0.78          | 1.73          | 1.35   | 0.61          | 3.00            |
| PBCS2    | 17   | 0.234 0.224 | 198 125 17 422 248 34    | 340 704   | 0.23     | 0.6285667     | 1  | 0.95   | 0.76          | 1.18          | 0.90   | 0.58          | 1.39            |
| WHS      | 6    | 0.268 0.221 | 52 41 6 332 199 23       | 99 554    | 2.16     | 0.141508      | 1  | 0.77   | 0.54          | 1.09          | 0.59   | 0.29          | 1.20            |
| PBCS 1+2 | 9    | 0.232 0.217 | 312 187 29 640 372 43    | 528 1055  | 0.93     | 0.3346859     | 1  | 0.92   | 0.77          | 1.09          | 0.84   | 0.59          | 1.20            |

Locus Alleles Chr Location Neighborhood  
rs12608723 A|G 19q13.11 38508973

| SUBSET | Rank | MAF | Geno Counts | Subjects | score X2 | score p-value | df | het OR | het OR 95% CI | het OR 95% CI | hom OR | hom OR 95% CI | hom OR 95% CI_u |
|--------|------|-----|-------------|----------|----------|---------------|----|--------|---------------|---------------|--------|---------------|-----------------|
|--------|------|-----|-------------|----------|----------|---------------|----|--------|---------------|---------------|--------|---------------|-----------------|

|          |    |             |                          |           |      |           |   |      |      |      |      |      |      |
|----------|----|-------------|--------------------------|-----------|------|-----------|---|------|------|------|------|------|------|
| STAGE1-3 | 7  | 0.131 0.121 | 1001 279 33 4075 1120 78 | 1313 5273 | 2.07 | 0.1503945 | 1 | 0.91 | 0.80 | 1.03 | 0.83 | 0.65 | 1.07 |
| NHS      | 1  | 0.156 0.121 | 127 55 1 624 169 13      | 183 806   | 3.31 | 0.0690526 | 1 | 0.74 | 0.54 | 1.02 | 0.55 | 0.29 | 1.05 |
| STAGE1-2 | 2  | 0.143 0.121 | 581 180 22 2831 783 52   | 783 3666  | 5.69 | 0.0170217 | 1 | 0.83 | 0.71 | 0.97 | 0.68 | 0.50 | 0.93 |
| STAGE2   | 4  | 0.139 0.121 | 454 125 21 2207 614 39   | 600 2860  | 2.97 | 0.0850757 | 1 | 0.85 | 0.71 | 1.02 | 0.73 | 0.51 | 1.05 |
| CPSII    | 15 | 0.131 0.114 | 33 7 2 250 60 6          | 42 316    | 0.19 | 0.6604261 | 1 | 0.86 | 0.45 | 1.66 | 0.75 | 0.20 | 2.74 |
| PBCS1    | 2  | 0.135 0.110 | 142 43 4 278 72 3        | 189 353   | 1.42 | 0.2335065 | 1 | 0.79 | 0.54 | 1.16 | 0.63 | 0.29 | 1.35 |
| PLCO     | 4  | 0.162 0.116 | 57 10 7 348 96 4         | 74 448    | 2.38 | 0.1232912 | 1 | 0.69 | 0.43 | 1.11 | 0.48 | 0.19 | 1.23 |
| WHI      | 15 | 0.137 0.126 | 222 65 8 1331 386 26     | 295 1743  | 0.61 | 0.433673  | 1 | 0.90 | 0.70 | 1.17 | 0.82 | 0.49 | 1.36 |
| STAGE3   | 17 | 0.115 0.122 | 420 100 11 1244 340 26   | 531 1610  | 0.35 | 0.556083  | 1 | 1.07 | 0.86 | 1.32 | 1.14 | 0.74 | 1.74 |
| NHS2     | 13 | 0.132 0.117 | 71 16 4 272 72 5         | 91 349    | 0.27 | 0.6052523 | 1 | 0.88 | 0.55 | 1.42 | 0.78 | 0.30 | 2.01 |
| PBCS2    | 10 | 0.102 0.119 | 276 62 4 554 145 12      | 342 711   | 1.22 | 0.2688138 | 1 | 1.18 | 0.88 | 1.58 | 1.39 | 0.78 | 2.49 |
| WHS      | 15 | 0.143 0.128 | 73 22 3 418 123 9        | 98 550    | 0.31 | 0.5765855 | 1 | 0.88 | 0.57 | 1.36 | 0.78 | 0.33 | 1.86 |
| PBCS 1+2 | 23 | 0.113 0.115 | 418 104 8 832 214 15     | 530 1061  | 0.02 | 0.8826962 | 1 | 1.02 | 0.81 | 1.28 | 1.04 | 0.65 | 1.64 |

Locus Alleles Chr Location Neighborhood  
rs10941679 A|G 5p12 44742255

| SUBSET   | Rank | MAF         | Geno Counts            | Subjects | score X2 | score p-value | df | het OR | het OR 95% CI | het OR 95% CI | hom OR | hom OR 95% CI | hom OR 95% CI_u |
|----------|------|-------------|------------------------|----------|----------|---------------|----|--------|---------------|---------------|--------|---------------|-----------------|
| STAGE1-3 | 8    | 0.262 0.282 | 383 276 47 991 791 148 | 706 1930 | 2.00     | 0.1569693     | 1  | 1.11   | 0.96          | 1.27          | 1.22   | 0.93          | 1.61            |
| STAGE3   | 3    | 0.245 0.277 | 298 198 30 830 650 118 | 526 1598 | 4.17     | 0.0410873     | 1  | 1.18   | 1.01          | 1.39          | 1.40   | 1.01          | 1.94            |
| NHS2     | 12   | 0.262 0.283 | 49 29 8 181 137 30     | 86 348   | 0.30     | 0.5838894     | 1  | 1.11   | 0.77          | 1.60          | 1.23   | 0.59          | 2.57            |
| PBCS2    | 1    | 0.235 0.288 | 196 130 15 350 308 50  | 341 708  | 7.09     | 0.0077615     | 1  | 1.34   | 1.08          | 1.67          | 1.81   | 1.17          | 2.79            |
| WHS      | 20   | 0.268 0.259 | 53 39 7 299 205 38     | 99 542   | 0.06     | 0.8044001     | 1  | 0.96   | 0.68          | 1.35          | 0.92   | 0.46          | 1.81            |
| PBCS 1+2 | 1    | 0.261 0.293 | 281 208 32 511 449 80  | 521 1040 | 3.60     | 0.0579455     | 1  | 1.18   | 0.99          | 1.40          | 1.39   | 0.99          | 1.96            |

Locus Alleles Chr Location Neighborhood  
rs2067980 A|G 5p12 45018074

| SUBSET   | Rank | MAF         | Geno Counts              | Subjects  | score X2 | score p-value | df | het OR | het OR 95% CI | het OR 95% CI | hom OR | hom OR 95% CI | hom OR 95% CI_u |
|----------|------|-------------|--------------------------|-----------|----------|---------------|----|--------|---------------|---------------|--------|---------------|-----------------|
| STAGE1-3 | 9    | 0.164 0.176 | 915 363 34 3610 1460 197 | 1312 5267 | 1.95     | 0.1622491     | 1  | 1.08   | 0.97          | 1.21          | 1.17   | 0.94          | 1.47            |
| NHS      | 13   | 0.172 0.179 | 125 53 5 542 240 24      | 183 806   | 0.09     | 0.7661948     | 1  | 1.05   | 0.77          | 1.42          | 1.10   | 0.60          | 2.01            |
| STAGE1-2 | 19   | 0.173 0.176 | 538 219 26 2510 1021 135 | 783 3666  | 0.08     | 0.7791053     | 1  | 1.02   | 0.89          | 1.18          | 1.04   | 0.78          | 1.38            |
| STAGE2   | 21   | 0.173 0.175 | 413 166 21 1968 781 111  | 600 2860  | 0.03     | 0.8705694     | 1  | 1.01   | 0.86          | 1.19          | 1.03   | 0.75          | 1.41            |
| CPSII    | 16   | 0.190 0.171 | 28 12 2 221 82 13        | 42 316    | 0.18     | 0.6684132     | 1  | 0.89   | 0.51          | 1.55          | 0.78   | 0.26          | 2.40            |
| PBCS1    | 6    | 0.251 0.231 | 107 69 13 208 127 18     | 189 353   | 0.57     | 0.4519804     | 1  | 0.89   | 0.67          | 1.20          | 0.80   | 0.45          | 1.43            |
| PLCO     | 7    | 0.122 0.156 | 57 16 1 322 112 14       | 74 448    | 1.13     | 0.2868424     | 1  | 1.32   | 0.79          | 2.21          | 1.75   | 0.62          | 4.90            |
| WHI      | 3    | 0.134 0.170 | 221 69 5 1217 460 66     | 295 1743  | 4.48     | 0.034234      | 1  | 1.31   | 1.02          | 1.67          | 1.70   | 1.04          | 2.79            |
| STAGE3   | 5    | 0.151 0.176 | 377 144 8 1100 440 62    | 529 1602  | 3.37     | 0.0662407     | 1  | 1.19   | 0.99          | 1.44          | 1.42   | 0.98          | 2.08            |
| NHS2     | 14   | 0.148 0.162 | 62 26 0 249 82 15        | 88 346    | 0.20     | 0.658212      | 1  | 1.11   | 0.71          | 1.73          | 1.22   | 0.50          | 3.00            |
| PBCS2    | 4    | 0.156 0.188 | 243 93 7 467 211 27      | 343 705   | 3.21     | 0.0732078     | 1  | 1.25   | 0.98          | 1.60          | 1.57   | 0.96          | 2.56            |
| WHS      | 9    | 0.138 0.170 | 72 25 1 384 147 20       | 98 551    | 1.19     | 0.2757344     | 1  | 1.27   | 0.83          | 1.95          | 1.61   | 0.68          | 3.80            |
| PBCS 1+2 | 12   | 0.190 0.202 | 350 162 20 675 337 45    | 532 1057  | 0.65     | 0.420228      | 1  | 1.08   | 0.90          | 1.30          | 1.16   | 0.80          | 1.69            |

Locus Alleles Chr Location Neighborhood  
rs998592 G|A 16p13.13 11107179 CLEC16A

| SUBSET   | Rank | MAF         | Geno Counts               | Subjects  | score X2 | score p-value | df | het OR | het OR 95% CI | het OR 95% CI | hom OR | hom OR 95% CI | hom OR 95% CI_u |
|----------|------|-------------|---------------------------|-----------|----------|---------------|----|--------|---------------|---------------|--------|---------------|-----------------|
| STAGE1-3 | 10   | 0.405 0.418 | 452 660 202 1751 2638 885 | 1314 5274 | 1.52     | 0.2180189     | 1  | 1.06   | 0.97          | 1.15          | 1.12   | 0.94          | 1.33            |
| NHS      | 16   | 0.434 0.429 | 54 99 30 253 415 139      | 183 807   | 0.03     | 0.855658      | 1  | 0.98   | 0.77          | 1.24          | 0.96   | 0.60          | 1.53            |
| STAGE1-2 | 4    | 0.402 0.425 | 270 396 117 1181 1857 629 | 783 3667  | 2.77     | 0.0959142     | 1  | 1.10   | 0.98          | 1.23          | 1.21   | 0.97          | 1.52            |
| STAGE2   | 2    | 0.393 0.423 | 216 297 87 928 1442 490   | 600 2860  | 4.03     | 0.0446343     | 1  | 1.14   | 1.00          | 1.30          | 1.30   | 1.01          | 1.69            |
| CPSII    | 11   | 0.369 0.416 | 17 19 6 107 155 54        | 42 316    | 0.68     | 0.4088112     | 1  | 1.22   | 0.76          | 1.96          | 1.49   | 0.58          | 3.83            |
| PBCS1    | 21   | 0.368 0.368 | 74 91 24 141 164 48       | 189 353   | 0.00     | 0.9857181     | 1  | 1.00   | 0.77          | 1.30          | 1.00   | 0.60          | 1.69            |
| PLCO     | 9    | 0.426 0.393 | 25 35 14 162 220 66       | 74 448    | 0.58     | 0.445215      | 1  | 0.87   | 0.61          | 1.24          | 0.76   | 0.37          | 1.55            |
| WHI      | 4    | 0.403 0.444 | 100 152 43 518 903 322    | 295 1743  | 3.53     | 0.0604453     | 1  | 1.19   | 0.99          | 1.43          | 1.42   | 0.98          | 2.04            |
| STAGE3   | 20   | 0.409 0.402 | 182 265 85 570 782 256    | 532 1608  | 0.14     | 0.7069771     | 1  | 0.97   | 0.84          | 1.12          | 0.95   | 0.71          | 1.26            |
| NHS2     | 4    | 0.483 0.423 | 22 47 19 119 167 65       | 88 351    | 2.04     | 0.1536396     | 1  | 0.79   | 0.56          | 1.09          | 0.62   | 0.32          | 1.20            |

|          |    |             |                        |          |      |           |   |      |      |      |      |      |      |
|----------|----|-------------|------------------------|----------|------|-----------|---|------|------|------|------|------|------|
| PBCS2    | 16 | 0.397 0.386 | 122 171 51 266 333 105 | 344 704  | 0.24 | 0.6210363 | 1 | 0.95 | 0.79 | 1.15 | 0.91 | 0.62 | 1.32 |
| WHS      | 13 | 0.385 0.410 | 38 47 15 185 282 86    | 100 553  | 0.48 | 0.4897434 | 1 | 1.12 | 0.81 | 1.53 | 1.25 | 0.66 | 2.35 |
| PBCS 1+2 | 18 | 0.386 0.380 | 196 261 75 407 496 153 | 532 1056 | 0.13 | 0.7188577 | 1 | 0.97 | 0.84 | 1.13 | 0.95 | 0.70 | 1.28 |

Locus Alleles Chr Location Neighborhood  
rs3817198 T|C 11p15.5 1865582 LSP1

| SUBSET   | Rank | MAF         | Geno Counts               | Subjects  | score X2 | score p-value | df | het OR | het OR 95% CI | het OR 95% CI | hom OR | hom OR 95% CI | hom OR 95% CI_u |
|----------|------|-------------|---------------------------|-----------|----------|---------------|----|--------|---------------|---------------|--------|---------------|-----------------|
| STAGE1-3 | 11   | 0.323 0.335 | 592 587 129 2368 2287 625 | 1308 5280 | 1.32     | 0.2502952     | 1  | 1.05   | 0.96          | 1.15          | 1.11   | 0.93          | 1.33            |
| NHS      | 6    | 0.308 0.328 | 82 88 12 373 339 95       | 182 807   | 0.54     | 0.4632186     | 1  | 1.10   | 0.86          | 1.40          | 1.20   | 0.74          | 1.96            |
| STAGE1-2 | 21   | 0.335 0.337 | 336 366 78 1631 1595 436  | 780 3662  | 0.03     | 0.8667912     | 1  | 1.01   | 0.90          | 1.13          | 1.02   | 0.81          | 1.28            |
| STAGE2   | 19   | 0.343 0.339 | 254 278 66 1258 1256 341  | 598 2855  | 0.05     | 0.8220666     | 1  | 0.99   | 0.86          | 1.12          | 0.97   | 0.75          | 1.26            |
| CPSII    | 13   | 0.381 0.340 | 16 20 6 139 138 38        | 42 315    | 0.55     | 0.4591504     | 1  | 0.84   | 0.53          | 1.34          | 0.70   | 0.28          | 1.79            |
| PBCS1    | 18   | 0.321 0.326 | 84 86 17 161 150 39       | 187 350   | 0.03     | 0.8710312     | 1  | 1.02   | 0.78          | 1.34          | 1.05   | 0.61          | 1.79            |
| PLCO     | 10   | 0.365 0.334 | 28 38 8 190 215 42        | 74 447    | 0.57     | 0.4493308     | 1  | 0.86   | 0.59          | 1.26          | 0.75   | 0.35          | 1.59            |
| WHI      | 21   | 0.346 0.343 | 126 134 35 768 753 222    | 295 1743  | 0.01     | 0.9115703     | 1  | 0.99   | 0.83          | 1.19          | 0.98   | 0.68          | 1.41            |
| STAGE3   | 9    | 0.308 0.331 | 255 222 52 734 693 189    | 529 1616  | 1.91     | 0.1673563     | 1  | 1.11   | 0.96          | 1.29          | 1.23   | 0.92          | 1.65            |
| NHS2     | 2    | 0.264 0.331 | 52 30 9 162 155 41        | 91 358    | 2.89     | 0.0891744     | 1  | 1.36   | 0.95          | 1.95          | 1.86   | 0.91          | 3.80            |
| PBCS2    | 22   | 0.333 0.330 | 154 148 40 326 301 84     | 342 711   | 0.02     | 0.8747063     | 1  | 0.98   | 0.81          | 1.19          | 0.97   | 0.66          | 1.42            |
| WHS      | 2    | 0.260 0.334 | 49 44 3 246 237 64        | 96 547    | 4.01     | 0.0453537     | 1  | 1.42   | 1.01          | 2.01          | 2.03   | 1.01          | 4.06            |
| PBCS 1+2 | 24   | 0.327 0.327 | 239 233 56 490 450 123    | 528 1063  | 0.00     | 0.9700755     | 1  | 1.00   | 0.86          | 1.17          | 1.01   | 0.74          | 1.37            |

Locus Alleles Chr Location Neighborhood  
rs17740709 A|G 12q21.31 81947471 TMTC2

| SUBSET   | Rank | MAF         | Geno Counts              | Subjects  | score X2 | score p-value | df | het OR | het OR 95% CI | het OR 95% CI | hom OR | hom OR 95% CI | hom OR 95% CI_u |
|----------|------|-------------|--------------------------|-----------|----------|---------------|----|--------|---------------|---------------|--------|---------------|-----------------|
| STAGE1-3 | 12   | 0.209 0.219 | 828 417 65 3251 1707 300 | 1310 5258 | 1.32     | 0.2503891     | 1  | 1.06   | 0.96          | 1.18          | 1.13   | 0.92          | 1.38            |
| NHS      | 2    | 0.180 0.222 | 121 58 4 502 251 54      | 183 807   | 2.92     | 0.0874756     | 1  | 1.28   | 0.96          | 1.70          | 1.63   | 0.93          | 2.87            |
| STAGE1-2 | 15   | 0.210 0.216 | 494 249 40 2293 1165 209 | 783 3667  | 0.24     | 0.6246167     | 1  | 1.03   | 0.91          | 1.18          | 1.07   | 0.82          | 1.38            |
| STAGE2   | 18   | 0.219 0.214 | 373 191 36 1791 914 155  | 600 2860  | 0.15     | 0.6987422     | 1  | 0.97   | 0.84          | 1.13          | 0.94   | 0.70          | 1.27            |
| CPSII    | 3    | 0.131 0.199 | 32 9 1 205 96 15         | 42 316    | 2.13     | 0.1442933     | 1  | 1.62   | 0.84          | 3.11          | 2.62   | 0.71          | 9.66            |
| PBCS1    | 13   | 0.254 0.245 | 106 70 13 203 127 23     | 189 353   | 0.10     | 0.7488889     | 1  | 0.95   | 0.72          | 1.27          | 0.91   | 0.52          | 1.61            |
| PLCO     | 19   | 0.209 0.218 | 48 21 5 277 147 24       | 74 448    | 0.05     | 0.8272912     | 1  | 1.05   | 0.69          | 1.59          | 1.10   | 0.48          | 2.52            |
| WHI      | 20   | 0.212 0.209 | 187 91 17 1106 544 93    | 295 1743  | 0.02     | 0.8953253     | 1  | 0.99   | 0.80          | 1.21          | 0.97   | 0.64          | 1.47            |
| STAGE3   | 7    | 0.207 0.228 | 334 168 25 958 544 91    | 527 1593  | 1.97     | 0.1607257     | 1  | 1.13   | 0.95          | 1.33          | 1.27   | 0.91          | 1.78            |
| NHS2     | 21   | 0.206 0.211 | 55 25 5 214 112 16       | 85 342    | 0.02     | 0.8957158     | 1  | 1.03   | 0.68          | 1.55          | 1.06   | 0.47          | 2.39            |
| PBCS2    | 2    | 0.212 0.254 | 215 109 18 398 260 50    | 342 708   | 4.34     | 0.0371725     | 1  | 1.26   | 1.01          | 1.56          | 1.58   | 1.03          | 2.43            |
| WHS      | 18   | 0.190 0.204 | 64 34 2 346 172 25       | 100 543   | 0.22     | 0.6419291     | 1  | 1.09   | 0.75          | 1.60          | 1.20   | 0.56          | 2.57            |
| PBCS 1+2 | 4    | 0.227 0.251 | 321 179 31 601 385 73    | 531 1059  | 2.10     | 0.1471582     | 1  | 1.13   | 0.96          | 1.35          | 1.29   | 0.91          | 1.81            |

Locus Alleles Chr Location Neighborhood  
rs17570439 T|C 1p34.2 40096797 TRIT1

| SUBSET   | Rank | MAF         | Geno Counts              | Subjects  | score X2 | score p-value | df | het OR | het OR 95% CI | het OR 95% CI | hom OR | hom OR 95% CI | hom OR 95% CI_u |
|----------|------|-------------|--------------------------|-----------|----------|---------------|----|--------|---------------|---------------|--------|---------------|-----------------|
| STAGE1-3 | 13   | 0.231 0.224 | 769 476 65 3177 1825 269 | 1310 5271 | 0.61     | 0.4332843     | 1  | 0.96   | 0.87          | 1.06          | 0.92   | 0.75          | 1.13            |
| NHS      | 11   | 0.238 0.245 | 107 65 11 457 304 46     | 183 807   | 0.10     | 0.7571436     | 1  | 1.04   | 0.80          | 1.36          | 1.09   | 0.64          | 1.86            |
| STAGE1-2 | 13   | 0.234 0.228 | 453 292 37 2196 1270 201 | 782 3667  | 0.26     | 0.607093      | 1  | 0.97   | 0.85          | 1.10          | 0.93   | 0.72          | 1.21            |
| STAGE2   | 9    | 0.233 0.223 | 346 227 26 1739 966 155  | 599 2860  | 0.54     | 0.4617744     | 1  | 0.95   | 0.82          | 1.10          | 0.90   | 0.67          | 1.20            |
| CPSII    | 6    | 0.262 0.201 | 22 18 2 203 99 14        | 42 316    | 1.66     | 0.1979045     | 1  | 0.71   | 0.42          | 1.20          | 0.50   | 0.18          | 1.44            |
| PBCS1    | 20   | 0.214 0.215 | 113 71 5 223 108 22      | 189 353   | 0.00     | 0.9694986     | 1  | 1.01   | 0.74          | 1.36          | 1.01   | 0.55          | 1.85            |
| PLCO     | 21   | 0.243 0.238 | 40 32 2 259 165 24       | 74 448    | 0.02     | 0.8816248     | 1  | 0.97   | 0.64          | 1.47          | 0.94   | 0.41          | 2.15            |
| WHI      | 17   | 0.238 0.225 | 171 106 17 1054 594 95   | 294 1743  | 0.49     | 0.4840673     | 1  | 0.93   | 0.76          | 1.14          | 0.86   | 0.58          | 1.30            |
| STAGE3   | 13   | 0.227 0.215 | 316 184 28 981 555 68    | 528 1604  | 0.67     | 0.4142288     | 1  | 0.93   | 0.79          | 1.10          | 0.87   | 0.62          | 1.22            |
| NHS2     | 22   | 0.236 0.232 | 53 30 6 201 125 17       | 89 343    | 0.01     | 0.9062201     | 1  | 0.98   | 0.66          | 1.44          | 0.95   | 0.44          | 2.08            |
| PBCS2    | 18   | 0.215 0.210 | 211 115 16 448 228 35    | 342 711   | 0.08     | 0.7806999     | 1  | 0.97   | 0.78          | 1.21          | 0.94   | 0.60          | 1.46            |
| WHS      | 5    | 0.263 0.213 | 52 39 6 332 202 16       | 97 550    | 2.64     | 0.1042766     | 1  | 0.74   | 0.51          | 1.07          | 0.54   | 0.26          | 1.14            |
| PBCS 1+2 | 22   | 0.215 0.211 | 324 186 21 671 336 57    | 531 1064  | 0.04     | 0.8356984     | 1  | 0.98   | 0.82          | 1.17          | 0.96   | 0.68          | 1.37            |



| Locus      | Alleles | Chr         | Location                  | Neighborhood |             |               |    |        |               |               |        |               |                 |  |  |
|------------|---------|-------------|---------------------------|--------------|-------------|---------------|----|--------|---------------|---------------|--------|---------------|-----------------|--|--|
| rs2391406  | T G     | 13q33.3     |                           | 106586873    |             |               |    |        |               |               |        |               |                 |  |  |
| SUBSET     | Rank    | MAF         | Geno Counts               | Subjects     | score X2    | score p-value | df | het OR | het OR 95% CI | het OR 95% CI | hom OR | hom OR 95% CI | hom OR 95% CI_u |  |  |
| STAGE1-3   | 14      | 0.359 0.367 | 521 636 152 2088 2463 694 | 1309 5245    | 0.60        | 0.4392051     | 1  | 1.04   | 0.95          | 1.13          | 1.07   | 0.90          | 1.29            |  |  |
| NHS        | 12      | 0.358 0.366 | 72 91 20 323 377 107      | 183 807      | 0.09        | 0.7649385     | 1  | 1.04   | 0.82          | 1.32          | 1.08   | 0.67          | 1.73            |  |  |
| STAGE1-2   | 12      | 0.355 0.363 | 314 380 87 1453 1759 451  | 781 3663     | 0.43        | 0.5139465     | 1  | 1.04   | 0.93          | 1.17          | 1.08   | 0.86          | 1.36            |  |  |
| STAGE2     | 15      | 0.354 0.362 | 242 289 67 1130 1382 344  | 598 2856     | 0.34        | 0.5584328     | 1  | 1.04   | 0.91          | 1.19          | 1.08   | 0.83          | 1.41            |  |  |
| CPSII      | 7       | 0.402 0.339 | 12 25 4 132 150 31        | 41 313       | 1.44        | 0.2308214     | 1  | 0.74   | 0.45          | 1.21          | 0.54   | 0.20          | 1.48            |  |  |
| PBCS1      | 10      | 0.362 0.375 | 78 84 26 125 190 37       | 188 352      | 0.20        | 0.6516887     | 1  | 1.06   | 0.81          | 1.40          | 1.13   | 0.66          | 1.95            |  |  |
| PLCO       | 14      | 0.345 0.360 | 29 39 6 180 213 55        | 74 448       | 0.15        | 0.7014692     | 1  | 1.08   | 0.74          | 1.57          | 1.16   | 0.55          | 2.45            |  |  |
| WHI        | 11      | 0.344 0.365 | 123 141 31 693 829 221    | 295 1743     | 0.95        | 0.3294828     | 1  | 1.10   | 0.91          | 1.32          | 1.20   | 0.83          | 1.75            |  |  |
| STAGE3     | 16      | 0.365 0.376 | 207 255 65 635 705 243    | 527 1583     | 0.39        | 0.5316013     | 1  | 1.05   | 0.91          | 1.21          | 1.10   | 0.82          | 1.46            |  |  |
| NHS2       | 6       | 0.348 0.402 | 37 42 10 129 162 60       | 89 351       | 1.66        | 0.1980689     | 1  | 1.25   | 0.89          | 1.76          | 1.56   | 0.79          | 3.08            |  |  |
| PBCS2      | 24      | 0.382 0.381 | 126 171 45 275 321 108    | 342 704      | 0.00        | 0.9934236     | 1  | 1.00   | 0.83          | 1.21          | 1.00   | 0.69          | 1.45            |  |  |
| WHS        | 12      | 0.323 0.352 | 44 42 10 231 222 75       | 96 528       | 0.58        | 0.4469854     | 1  | 1.13   | 0.82          | 1.55          | 1.28   | 0.68          | 2.42            |  |  |
| PBCS 1+2   | 21      | 0.375 0.379 | 204 256 71 400 510 145    | 531 1055     | 0.06        | 0.8075242     | 1  | 1.02   | 0.87          | 1.19          | 1.04   | 0.76          | 1.41            |  |  |
| Locus      | Alleles | Chr         | Location                  | Neighborhood |             |               |    |        |               |               |        |               |                 |  |  |
| rs11077820 | T C     | 17q25.1     |                           | 71966263     | UBE2O,AANAT |               |    |        |               |               |        |               |                 |  |  |
| SUBSET     | Rank    | MAF         | Geno Counts               | Subjects     | score X2    | score p-value | df | het OR | het OR 95% CI | het OR 95% CI | hom OR | hom OR 95% CI | hom OR 95% CI_u |  |  |
| STAGE1-3   | 15      | 0.359 0.367 | 543 598 173 2153 2342 760 | 1314 5255    | 0.60        | 0.4401695     | 1  | 1.04   | 0.95          | 1.13          | 1.07   | 0.90          | 1.28            |  |  |
| NHS        | 21      | 0.374 0.374 | 73 83 27 329 353 125      | 183 807      | 0.00        | 0.9803225     | 1  | 1.00   | 0.79          | 1.25          | 0.99   | 0.63          | 1.57            |  |  |
| STAGE1-2   | 14      | 0.361 0.368 | 318 364 101 1502 1623 538 | 783 3663     | 0.26        | 0.6095677     | 1  | 1.03   | 0.92          | 1.15          | 1.06   | 0.85          | 1.32            |  |  |
| STAGE2     | 14      | 0.357 0.367 | 245 281 74 1173 1270 413  | 600 2856     | 0.37        | 0.5431218     | 1  | 1.04   | 0.92          | 1.18          | 1.08   | 0.84          | 1.40            |  |  |
| CPSII      | 22      | 0.357 0.359 | 17 20 5 131 143 42        | 42 316       | 0.00        | 0.9710228     | 1  | 1.01   | 0.63          | 1.62          | 1.02   | 0.40          | 2.62            |  |  |
| PBCS1      | 1       | 0.381 0.334 | 74 86 29 160 150 43       | 189 353      | 2.26        | 0.1330034     | 1  | 0.82   | 0.64          | 1.06          | 0.68   | 0.41          | 1.13            |  |  |
| PLCO       | 22      | 0.358 0.354 | 30 35 9 188 200 58        | 74 446       | 0.01        | 0.9282604     | 1  | 0.98   | 0.69          | 1.41          | 0.97   | 0.47          | 1.99            |  |  |
| WHI        | 6       | 0.342 0.378 | 124 140 31 694 777 270    | 295 1741     | 2.67        | 0.1019762     | 1  | 1.16   | 0.97          | 1.39          | 1.35   | 0.94          | 1.94            |  |  |
| STAGE3     | 18      | 0.356 0.365 | 225 234 72 651 720 222    | 531 1593     | 0.30        | 0.585848      | 1  | 1.04   | 0.90          | 1.20          | 1.08   | 0.81          | 1.44            |  |  |
| NHS2       | 8       | 0.337 0.373 | 43 32 14 136 163 48       | 89 347       | 0.77        | 0.3805511     | 1  | 1.16   | 0.83          | 1.64          | 1.36   | 0.69          | 2.68            |  |  |
| PBCS2      | 13      | 0.366 0.382 | 141 153 49 269 335 102    | 343 706      | 0.49        | 0.4844427     | 1  | 1.07   | 0.89          | 1.29          | 1.14   | 0.79          | 1.67            |  |  |
| WHS        | 24      | 0.338 0.339 | 41 49 9 246 222 72        | 99 540       | 0.00        | 0.98927       | 1  | 1.00   | 0.73          | 1.37          | 1.00   | 0.54          | 1.87            |  |  |
| PBCS 1+2   | 19      | 0.371 0.366 | 215 239 78 429 484 145    | 532 1058     | 0.09        | 0.7658237     | 1  | 0.98   | 0.84          | 1.14          | 0.96   | 0.71          | 1.29            |  |  |
| Locus      | Alleles | Chr         | Location                  | Neighborhood |             |               |    |        |               |               |        |               |                 |  |  |
| rs4415084  | C T     | 5p12        |                           | 44698272     |             |               |    |        |               |               |        |               |                 |  |  |
| SUBSET     | Rank    | MAF         | Geno Counts               | Subjects     | score X2    | score p-value | df | het OR | het OR 95% CI | het OR 95% CI | hom OR | hom OR 95% CI | hom OR 95% CI_u |  |  |
| STAGE1-3   | 16      | 0.423 0.430 | 439 636 236 1736 2512 998 | 1311 5246    | 0.42        | 0.516192      | 1  | 1.03   | 0.94          | 1.12          | 1.06   | 0.89          | 1.26            |  |  |
| NHS        | 10      | 0.448 0.437 | 57 87 38 240 421 139      | 182 800      | 0.15        | 0.6972068     | 1  | 0.95   | 0.75          | 1.21          | 0.91   | 0.57          | 1.46            |  |  |
| STAGE1-2   | 18      | 0.424 0.428 | 267 367 148 1209 1769 681 | 782 3659     | 0.08        | 0.77770145    | 1  | 1.02   | 0.91          | 1.13          | 1.03   | 0.83          | 1.28            |  |  |
| STAGE2     | 17      | 0.417 0.425 | 210 280 110 969 1348 542  | 600 2859     | 0.29        | 0.5878464     | 1  | 1.03   | 0.91          | 1.17          | 1.07   | 0.84          | 1.37            |  |  |
| CPSII      | 21      | 0.393 0.389 | 16 19 7 121 144 51        | 42 316       | 0.00        | 0.9501369     | 1  | 0.99   | 0.62          | 1.56          | 0.97   | 0.39          | 2.42            |  |  |
| PBCS1      | 11      | 0.476 0.463 | 55 88 46 97 185 71        | 189 353      | 0.17        | 0.6805199     | 1  | 0.95   | 0.74          | 1.22          | 0.90   | 0.54          | 1.49            |  |  |
| PLCO       | 3       | 0.338 0.407 | 28 42 4 163 205 80        | 74 448       | 2.53        | 0.1114793     | 1  | 1.34   | 0.93          | 1.94          | 1.81   | 0.87          | 3.75            |  |  |
| WHI        | 9       | 0.402 0.429 | 111 131 53 588 814 340    | 295 1742     | 1.45        | 0.2292366     | 1  | 1.11   | 0.94          | 1.32          | 1.24   | 0.87          | 1.75            |  |  |
| STAGE3     | 14      | 0.421 0.434 | 173 269 89 528 747 319    | 531 1594     | 0.58        | 0.4460561     | 1  | 1.06   | 0.92          | 1.21          | 1.11   | 0.84          | 1.47            |  |  |
| NHS2       | 7       | 0.402 0.447 | 32 46 14 111 161 74       | 92 346       | 1.12        | 0.2903527     | 1  | 1.19   | 0.86          | 1.65          | 1.42   | 0.74          | 2.72            |  |  |
| PBCS2      | 9       | 0.413 0.440 | 117 165 58 226 346 140    | 340 712      | 1.29        | 0.2555841     | 1  | 1.11   | 0.93          | 1.34          | 1.24   | 0.86          | 1.79            |  |  |
| WHS        | 8       | 0.465 0.420 | 24 58 17 191 240 105      | 99 536       | 1.32        | 0.2503235     | 1  | 0.84   | 0.62          | 1.13          | 0.70   | 0.39          | 1.28            |  |  |
| PBCS 1+2   | 14      | 0.435 0.447 | 171 253 103 322 527 209   | 527 1058     | 0.35        | 0.5534333     | 1  | 1.05   | 0.90          | 1.21          | 1.09   | 0.81          | 1.47            |  |  |
| Locus      | Alleles | Chr         | Location                  | Neighborhood |             |               |    |        |               |               |        |               |                 |  |  |
| rs3134615  | G T     | 1p34.2      |                           | 40134653     | TRIT1,MYCL1 |               |    |        |               |               |        |               |                 |  |  |

| SUBSET   | Rank | MAF         | Geno Counts              | Subjects  | score X2 | score p-value | df | het OR | het OR 95% CI | het OR 95% CI | hom OR | hom OR 95% CI | hom OR 95% CI_u |
|----------|------|-------------|--------------------------|-----------|----------|---------------|----|--------|---------------|---------------|--------|---------------|-----------------|
| STAGE1-3 | 17   | 0.249 0.243 | 734 499 77 3003 1970 297 | 1310 5270 | 0.41     | 0.5210439     | 1  | 0.97   | 0.88          | 1.07          | 0.94   | 0.77          | 1.14            |
| NHS      | 20   | 0.260 0.262 | 101 69 13 433 325 49     | 183 807   | 0.01     | 0.9199331     | 1  | 1.01   | 0.78          | 1.32          | 1.03   | 0.61          | 1.74            |
| STAGE1-2 | 11   | 0.255 0.247 | 428 310 45 2072 1377 218 | 783 3667  | 0.47     | 0.4911162     | 1  | 0.96   | 0.84          | 1.09          | 0.92   | 0.71          | 1.18            |
| STAGE2   | 8    | 0.254 0.243 | 327 241 32 1639 1052 169 | 600 2860  | 0.67     | 0.4113562     | 1  | 0.94   | 0.82          | 1.09          | 0.89   | 0.66          | 1.18            |
| CPSII    | 14   | 0.250 0.222 | 23 17 2 193 106 17       | 42 316    | 0.34     | 0.5597335     | 1  | 0.86   | 0.51          | 1.45          | 0.73   | 0.26          | 2.09            |
| PBCS1    | 17   | 0.235 0.231 | 106 77 6 213 117 23      | 189 353   | 0.03     | 0.8649575     | 1  | 0.97   | 0.73          | 1.31          | 0.95   | 0.53          | 1.72            |
| PLCO     | 17   | 0.264 0.253 | 38 33 3 247 175 26       | 74 448    | 0.07     | 0.7874276     | 1  | 0.95   | 0.63          | 1.42          | 0.89   | 0.40          | 2.01            |
| WHI      | 12   | 0.264 0.247 | 160 114 21 986 654 103   | 295 1743  | 0.85     | 0.3562168     | 1  | 0.91   | 0.75          | 1.11          | 0.83   | 0.56          | 1.23            |
| STAGE3   | 21   | 0.241 0.235 | 306 190 32 931 595 80    | 528 1606  | 0.13     | 0.7138456     | 1  | 0.97   | 0.82          | 1.14          | 0.94   | 0.68          | 1.31            |
| NHS2     | 16   | 0.230 0.244 | 54 26 7 196 131 19       | 87 346    | 0.15     | 0.6942542     | 1  | 1.08   | 0.73          | 1.60          | 1.17   | 0.53          | 2.56            |
| PBCS2    | 19   | 0.230 0.225 | 202 124 17 427 240 39    | 343 706   | 0.07     | 0.7943547     | 1  | 0.97   | 0.78          | 1.21          | 0.94   | 0.61          | 1.45            |
| WHS      | 7    | 0.286 0.242 | 50 40 8 308 224 22       | 98 554    | 1.87     | 0.1713057     | 1  | 0.78   | 0.55          | 1.11          | 0.61   | 0.30          | 1.24            |
| PBCS 1+2 | 16   | 0.232 0.226 | 308 200 23 640 355 61    | 531 1056  | 0.13     | 0.7146185     | 1  | 0.97   | 0.81          | 1.15          | 0.94   | 0.66          | 1.33            |

Locus Alleles Chr Location Neighborhood  
rs2303659 G|A 11q24.3 129326474 PRDM10

| SUBSET   | Rank | MAF         | Geno Counts          | Subjects  | score X2 | score p-value | df | het OR | het OR 95% CI | het OR 95% CI | hom OR | hom OR 95% CI | hom OR 95% CI_u |
|----------|------|-------------|----------------------|-----------|----------|---------------|----|--------|---------------|---------------|--------|---------------|-----------------|
| STAGE1-3 | 18   | 0.024 0.026 | 1251 59 2 4997 257 9 | 1312 5263 | 0.36     | 0.5478617     | 1  | 1.09   | 0.83          | 1.43          | 1.18   | 0.69          | 2.04            |
| NHS      | 8    | 0.022 0.026 | 175 8 0 765 42 0     | 183 807   | 0.22     | 0.6422698     | 1  | 1.20   | 0.55          | 2.60          | 1.44   | 0.31          | 6.78            |
| STAGE1-2 | 10   | 0.022 0.025 | 749 34 0 3487 178 2  | 783 3667  | 0.53     | 0.4673041     | 1  | 1.15   | 0.79          | 1.66          | 1.32   | 0.63          | 2.77            |
| STAGE2   | 16   | 0.022 0.024 | 574 26 0 2722 136 2  | 600 2860  | 0.33     | 0.5631877     | 1  | 1.13   | 0.74          | 1.73          | 1.28   | 0.55          | 2.99            |
| CPSII    | 24   | 0.000 0.019 | 42 0 0 305 10 1      | 42 316    |          |               |    |        |               |               |        |               |                 |
| PBCS1    | 14   | 0.021 0.024 | 181 8 0 336 17 0     | 189 353   | 0.10     | 0.7577773     | 1  | 1.14   | 0.48          | 2.70          | 1.31   | 0.23          | 7.31            |
| PLCO     | 13   | 0.020 0.026 | 71 3 0 425 23 0      | 74 448    | 0.16     | 0.6924138     | 1  | 1.28   | 0.37          | 4.38          | 1.64   | 0.14          | 19.17           |
| WHI      | 23   | 0.025 0.025 | 280 15 0 1656 86 1   | 295 1743  | 0.00     | 0.979396      | 1  | 0.99   | 0.57          | 1.73          | 0.99   | 0.32          | 3.00            |
| STAGE3   | 23   | 0.027 0.029 | 502 25 2 1511 79 7   | 529 1597  | 0.07     | 0.7855634     | 1  | 1.06   | 0.71          | 1.58          | 1.12   | 0.50          | 2.48            |
| NHS2     | 24   | 0.000 0.030 | 88 0 0 334 15 3      | 88 352    |          |               |    |        |               |               |        |               |                 |
| PBCS2    | 14   | 0.033 0.028 | 322 21 1 669 40 0    | 344 709   | 0.43     | 0.5098409     | 1  | 0.84   | 0.50          | 1.41          | 0.70   | 0.25          | 2.00            |
| WHS      | 22   | 0.031 0.030 | 92 4 1 508 24 4      | 97 536    | 0.01     | 0.9420891     | 1  | 0.97   | 0.44          | 2.15          | 0.94   | 0.19          | 4.62            |
| PBCS 1+2 | 17   | 0.029 0.027 | 503 29 1 1004 57 0   | 533 1061  | 0.13     | 0.717556      | 1  | 0.92   | 0.59          | 1.44          | 0.85   | 0.35          | 2.07            |

Locus Alleles Chr Location Neighborhood  
rs724244 C|T 3p24.1 27217157 NEK10

| SUBSET   | Rank | MAF         | Geno Counts              | Subjects  | score X2 | score p-value | df | het OR | het OR 95% CI | het OR 95% CI | hom OR | hom OR 95% CI | hom OR 95% CI_u |
|----------|------|-------------|--------------------------|-----------|----------|---------------|----|--------|---------------|---------------|--------|---------------|-----------------|
| STAGE1-3 | 19   | 0.267 0.274 | 609 432 85 2365 1767 340 | 1126 4472 | 0.35     | 0.5517828     | 1  | 1.03   | 0.93          | 1.14          | 1.07   | 0.87          | 1.31            |
| STAGE1-2 | 22   | 0.277 0.275 | 316 234 49 1508 1131 220 | 599 2859  | 0.03     | 0.8673675     | 1  | 0.99   | 0.86          | 1.14          | 0.98   | 0.74          | 1.29            |
| STAGE2   | 20   | 0.277 0.275 | 316 234 49 1508 1131 220 | 599 2859  | 0.03     | 0.8673675     | 1  | 0.99   | 0.86          | 1.14          | 0.98   | 0.74          | 1.29            |
| CPSII    | 12   | 0.310 0.266 | 21 16 5 173 118 25       | 42 316    | 0.68     | 0.4092313     | 1  | 0.82   | 0.50          | 1.32          | 0.67   | 0.25          | 1.75            |
| PBCS1    | 8    | 0.250 0.265 | 106 70 12 198 123 32     | 188 353   | 0.26     | 0.6078967     | 1  | 1.08   | 0.81          | 1.42          | 1.16   | 0.66          | 2.01            |
| PLCO     | 16   | 0.257 0.271 | 44 22 8 235 182 30       | 74 447    | 0.13     | 0.7236253     | 1  | 1.07   | 0.72          | 1.60          | 1.15   | 0.52          | 2.55            |
| WHI      | 16   | 0.295 0.279 | 145 126 24 902 708 133   | 295 1743  | 0.61     | 0.4359268     | 1  | 0.93   | 0.76          | 1.12          | 0.86   | 0.58          | 1.26            |
| STAGE3   | 11   | 0.257 0.272 | 294 198 37 857 636 120   | 529 1613  | 0.84     | 0.3587591     | 1  | 1.08   | 0.92          | 1.26          | 1.16   | 0.85          | 1.59            |
| NHS2     | 20   | 0.278 0.286 | 48 31 9 179 142 29       | 88 350    | 0.04     | 0.8498463     | 1  | 1.04   | 0.72          | 1.49          | 1.07   | 0.52          | 2.22            |
| PBCS2    | 11   | 0.244 0.265 | 198 121 23 381 280 48    | 342 709   | 1.06     | 0.3035432     | 1  | 1.12   | 0.90          | 1.38          | 1.25   | 0.82          | 1.90            |
| WHS      | 19   | 0.283 0.271 | 48 46 5 297 214 43       | 99 554    | 0.12     | 0.7248184     | 1  | 0.94   | 0.67          | 1.32          | 0.89   | 0.45          | 1.74            |
| PBCS 1+2 | 7    | 0.245 0.265 | 303 191 34 579 403 80    | 528 1062  | 1.41     | 0.2355662     | 1  | 1.11   | 0.94          | 1.31          | 1.23   | 0.88          | 1.72            |

Locus Alleles Chr Location Neighborhood  
rs1274466 T|C 10p11.21 34510210 PARD3

| SUBSET   | Rank | MAF         | Geno Counts                | Subjects  | score X2 | score p-value | df | het OR | het OR 95% CI | het OR 95% CI | hom OR | hom OR 95% CI | hom OR 95% CI_u |
|----------|------|-------------|----------------------------|-----------|----------|---------------|----|--------|---------------|---------------|--------|---------------|-----------------|
| STAGE1-3 | 20   | 0.436 0.433 | 411 654 244 1706 2563 1004 | 1309 5273 | 0.07     | 0.7980389     | 1  | 0.99   | 0.91          | 1.08          | 0.98   | 0.82          | 1.16            |
| NHS      | 18   | 0.432 0.436 | 55 98 30 261 388 158       | 183 807   | 0.02     | 0.8758088     | 1  | 1.02   | 0.81          | 1.28          | 1.04   | 0.66          | 1.64            |

|          |    |             |                           |          |      |           |   |      |      |      |      |      |      |
|----------|----|-------------|---------------------------|----------|------|-----------|---|------|------|------|------|------|------|
| STAGE1-2 | 20 | 0.427 0.429 | 248 402 133 1213 1761 692 | 783 3666 | 0.03 | 0.8634978 | 1 | 1.01 | 0.90 | 1.13 | 1.02 | 0.82 | 1.27 |
| STAGE2   | 22 | 0.425 0.427 | 193 304 103 952 1373 534  | 600 2859 | 0.01 | 0.904253  | 1 | 1.01 | 0.89 | 1.14 | 1.02 | 0.79 | 1.30 |
| CPSII    | 19 | 0.429 0.440 | 15 18 9 101 152 63        | 42 316   | 0.04 | 0.8471834 | 1 | 1.05 | 0.67 | 1.64 | 1.09 | 0.44 | 2.70 |
| PBCS1    | 7  | 0.439 0.457 | 57 98 34 104 174 74       | 189 352  | 0.34 | 0.5625296 | 1 | 1.08 | 0.84 | 1.39 | 1.16 | 0.70 | 1.93 |
| PLCO     | 5  | 0.453 0.391 | 22 37 15 167 212 69       | 74 448   | 2.03 | 0.154338  | 1 | 0.78 | 0.55 | 1.10 | 0.60 | 0.30 | 1.21 |
| WHI      | 13 | 0.408 0.428 | 99 151 45 580 835 328     | 295 1743 | 0.76 | 0.3844313 | 1 | 1.08 | 0.91 | 1.29 | 1.17 | 0.82 | 1.66 |
| STAGE3   | 22 | 0.450 0.444 | 164 252 111 493 802 313   | 527 1608 | 0.10 | 0.747313  | 1 | 0.98 | 0.85 | 1.12 | 0.96 | 0.72 | 1.26 |
| NHS2     | 3  | 0.500 0.429 | 21 47 21 114 168 65       | 89 347   | 2.86 | 0.0909365 | 1 | 0.75 | 0.54 | 1.05 | 0.57 | 0.29 | 1.10 |
| PBCS2    | 12 | 0.432 0.451 | 115 156 69 211 357 141    | 340 709  | 0.62 | 0.4325401 | 1 | 1.08 | 0.90 | 1.29 | 1.16 | 0.80 | 1.67 |
| WHS      | 16 | 0.464 0.445 | 28 49 21 168 277 107      | 98 552   | 0.26 | 0.6096394 | 1 | 0.92 | 0.68 | 1.25 | 0.85 | 0.46 | 1.57 |
| PBCS 1+2 | 10 | 0.436 0.452 | 171 254 103 315 531 214   | 528 1060 | 0.80 | 0.37099   | 1 | 1.07 | 0.92 | 1.24 | 1.15 | 0.85 | 1.54 |

Locus Alleles Chr Location Neighborhood  
rs10850145 C|T 12q24.13 112428512

| SUBSET   | Rank | MAF         | Geno Counts              | Subjects  | score X2 | score p-value | df | het OR | het OR 95% CI | het OR 95% CI | hom OR | hom OR 95% CI | hom OR 95% CI_u |
|----------|------|-------------|--------------------------|-----------|----------|---------------|----|--------|---------------|---------------|--------|---------------|-----------------|
| STAGE1-3 | 21   | 0.108 0.109 | 1047 249 17 4185 1048 54 | 1313 5287 | 0.05     | 0.8178044     | 1  | 1.02   | 0.89          | 1.17          | 1.03   | 0.78          | 1.36            |
| NHS      | 7    | 0.117 0.108 | 145 33 5 642 155 10      | 183 807   | 0.24     | 0.6224405     | 1  | 0.92   | 0.65          | 1.30          | 0.84   | 0.42          | 1.69            |
| STAGE1-2 | 16   | 0.107 0.111 | 626 146 11 2898 724 43   | 783 3665  | 0.14     | 0.7112003     | 1  | 1.03   | 0.87          | 1.23          | 1.07   | 0.75          | 1.52            |
| STAGE2   | 11   | 0.104 0.111 | 481 113 6 2256 569 33    | 600 2858  | 0.49     | 0.4838183     | 1  | 1.08   | 0.88          | 1.32          | 1.16   | 0.77          | 1.74            |
| CPSII    | 8    | 0.071 0.111 | 37 4 1 250 62 4          | 42 316    | 1.18     | 0.278287      | 1  | 1.60   | 0.68          | 3.78          | 2.57   | 0.46          | 14.31           |
| PBCS1    | 3    | 0.101 0.123 | 152 36 1 270 79 4        | 189 353   | 1.30     | 0.2550826     | 1  | 1.27   | 0.84          | 1.92          | 1.61   | 0.71          | 3.67            |
| PLCO     | 11   | 0.122 0.106 | 56 18 0 357 87 4         | 74 448    | 0.33     | 0.5632749     | 1  | 0.85   | 0.49          | 1.47          | 0.72   | 0.24          | 2.17            |
| WHI      | 19   | 0.107 0.110 | 236 55 4 1379 341 21     | 295 1741  | 0.05     | 0.8174184     | 1  | 1.03   | 0.78          | 1.37          | 1.07   | 0.61          | 1.88            |
| STAGE3   | 24   | 0.108 0.107 | 421 103 6 1289 324 11    | 530 1624  | 0.03     | 0.8547972     | 1  | 0.98   | 0.78          | 1.23          | 0.96   | 0.61          | 1.51            |
| NHS2     | 5    | 0.136 0.100 | 68 16 4 290 59 6         | 88 355    | 1.75     | 0.1863582     | 1  | 0.73   | 0.46          | 1.17          | 0.53   | 0.21          | 1.36            |
| PBCS2    | 21   | 0.105 0.107 | 273 68 2 565 143 5       | 343 713   | 0.03     | 0.8672025     | 1  | 1.03   | 0.76          | 1.39          | 1.05   | 0.57          | 1.93            |
| WHS      | 14   | 0.096 0.110 | 80 19 0 434 122 0        | 99 556    | 0.38     | 0.539559      | 1  | 1.18   | 0.69          | 2.03          | 1.40   | 0.48          | 4.12            |
| PBCS 1+2 | 11   | 0.103 0.113 | 425 104 3 833 222 9      | 532 1064  | 0.67     | 0.4120617     | 1  | 1.11   | 0.87          | 1.41          | 1.23   | 0.75          | 2.00            |

Locus Alleles Chr Location Neighborhood  
rs37936 A|G 7q21.11 79806994

| SUBSET   | Rank | MAF         | Geno Counts               | Subjects  | score X2 | score p-value | df | het OR | het OR 95% CI | het OR 95% CI | hom OR | hom OR 95% CI | hom OR 95% CI_u |
|----------|------|-------------|---------------------------|-----------|----------|---------------|----|--------|---------------|---------------|--------|---------------|-----------------|
| STAGE1-3 | 22   | 0.370 0.367 | 521 572 187 2078 2378 707 | 1280 5163 | 0.05     | 0.8300158     | 1  | 0.99   | 0.91          | 1.08          | 0.98   | 0.82          | 1.17            |
| NHS      | 15   | 0.369 0.362 | 77 68 31 333 343 115      | 176 791   | 0.06     | 0.809188      | 1  | 0.97   | 0.77          | 1.22          | 0.94   | 0.60          | 1.50            |
| STAGE1-2 | 9    | 0.374 0.363 | 233 255 88 1325 1468 438  | 576 3231  | 0.54     | 0.4641672     | 1  | 0.95   | 0.84          | 1.08          | 0.91   | 0.70          | 1.17            |
| STAGE2   | 10   | 0.376 0.363 | 156 187 57 992 1125 323   | 400 2440  | 0.53     | 0.468207      | 1  | 0.94   | 0.81          | 1.10          | 0.89   | 0.66          | 1.21            |
| CPSII    | 2    | 0.263 0.355 | 19 21 0 131 139 41        | 40 311    | 2.73     | 0.0986547     | 1  | 1.56   | 0.92          | 2.64          | 2.42   | 0.84          | 6.98            |
| PLCO     | 12   | 0.396 0.372 | 26 35 11 181 186 69       | 72 436    | 0.29     | 0.5903116     | 1  | 0.91   | 0.64          | 1.29          | 0.83   | 0.41          | 1.66            |
| WHI      | 10   | 0.387 0.362 | 111 131 46 680 800 213    | 288 1693  | 1.35     | 0.2449846     | 1  | 0.90   | 0.75          | 1.08          | 0.80   | 0.56          | 1.16            |
| STAGE3   | 19   | 0.382 0.374 | 205 241 81 624 763 219    | 527 1606  | 0.24     | 0.622882      | 1  | 0.96   | 0.84          | 1.11          | 0.93   | 0.70          | 1.24            |
| NHS2     | 11   | 0.422 0.399 | 33 38 19 128 174 56       | 90 358    | 0.30     | 0.5809346     | 1  | 0.91   | 0.66          | 1.27          | 0.83   | 0.43          | 1.60            |
| PBCS2    | 23   | 0.362 0.360 | 134 163 41 283 324 88     | 338 695   | 0.01     | 0.9029782     | 1  | 0.99   | 0.81          | 1.20          | 0.98   | 0.66          | 1.44            |
| WHS      | 10   | 0.414 0.375 | 38 40 21 213 265 75       | 99 553    | 1.07     | 0.3011098     | 1  | 0.85   | 0.63          | 1.16          | 0.72   | 0.39          | 1.34            |
| PBCS 1+2 | 8    | 0.347 0.366 | 217 239 59 412 471 138    | 515 1021  | 1.10     | 0.2937436     | 1  | 1.09   | 0.93          | 1.27          | 1.18   | 0.86          | 1.62            |

Locus Alleles Chr Location Neighborhood  
rs7121523 G|A 11p15.4 7556781 PPFIBP2

| SUBSET   | Rank | MAF         | Geno Counts              | Subjects  | score X2 | score p-value | df | het OR | het OR 95% CI | het OR 95% CI | hom OR | hom OR 95% CI | hom OR 95% CI_u |
|----------|------|-------------|--------------------------|-----------|----------|---------------|----|--------|---------------|---------------|--------|---------------|-----------------|
| STAGE1-3 | 23   | 0.162 0.161 | 925 353 36 3746 1354 170 | 1314 5270 | 0.01     | 0.9026954     | 1  | 0.99   | 0.89          | 1.11          | 0.99   | 0.79          | 1.24            |
| NHS      | 17   | 0.164 0.168 | 129 48 6 572 199 36      | 183 807   | 0.03     | 0.8611038     | 1  | 1.03   | 0.77          | 1.37          | 1.05   | 0.59          | 1.89            |
| STAGE1-2 | 7    | 0.176 0.161 | 533 223 26 2613 923 129  | 782 3665  | 1.92     | 0.1653389     | 1  | 0.91   | 0.79          | 1.04          | 0.82   | 0.62          | 1.09            |
| STAGE2   | 5    | 0.179 0.159 | 404 175 20 2041 724 93   | 599 2858  | 2.85     | 0.0910964     | 1  | 0.87   | 0.74          | 1.02          | 0.76   | 0.55          | 1.05            |
| CPSII    | 18   | 0.183 0.171 | 29 9 3 220 84 12         | 41 316    | 0.07     | 0.7943898     | 1  | 0.93   | 0.52          | 1.64          | 0.86   | 0.27          | 2.70            |
| PBCS1    | 12   | 0.148 0.156 | 134 54 1 259 76 17       | 189 352   | 0.12     | 0.7338234     | 1  | 1.06   | 0.76          | 1.49          | 1.12   | 0.57          | 2.21            |

|          |    |             |                        |          |      |           |   |      |      |      |      |      |      |
|----------|----|-------------|------------------------|----------|------|-----------|---|------|------|------|------|------|------|
| PLCO     | 1  | 0.230 0.160 | 41 32 1 318 117 13     | 74 448   | 4.50 | 0.0339221 | 1 | 0.63 | 0.41 | 0.97 | 0.40 | 0.17 | 0.94 |
| WHI      | 5  | 0.186 0.158 | 200 80 15 1244 447 51  | 295 1742 | 2.96 | 0.0851514 | 1 | 0.82 | 0.66 | 1.03 | 0.68 | 0.44 | 1.06 |
| STAGE3   | 6  | 0.141 0.160 | 392 130 10 1133 431 41 | 532 1605 | 2.17 | 0.1410471 | 1 | 1.16 | 0.95 | 1.41 | 1.34 | 0.91 | 1.99 |
| NHS2     | 23 | 0.154 0.153 | 65 24 2 254 88 10      | 91 352   | 0.00 | 0.9885213 | 1 | 1.00 | 0.64 | 1.56 | 0.99 | 0.41 | 2.42 |
| PBCS2    | 8  | 0.136 0.158 | 254 81 6 496 184 18    | 341 698  | 1.61 | 0.2046553 | 1 | 1.18 | 0.91 | 1.54 | 1.40 | 0.83 | 2.37 |
| WHS      | 11 | 0.145 0.167 | 73 25 2 383 159 13     | 100 555  | 0.60 | 0.4390887 | 1 | 1.18 | 0.77 | 1.82 | 1.40 | 0.59 | 3.32 |
| PBCS 1+2 | 6  | 0.141 0.157 | 388 135 7 755 260 35   | 530 1050 | 1.46 | 0.2262763 | 1 | 1.14 | 0.92 | 1.40 | 1.29 | 0.85 | 1.95 |

Locus Alleles Chr Location Neighborhood  
rs4666451 G|A 2p24.1 19150424

| SUBSET   | Rank | MAF         | Geno Counts               | Subjects  | score X2 | score p-value | df | het OR | het OR 95% CI | het OR 95% CI | hom OR | hom OR 95% CI | hom OR 95% CI_u |
|----------|------|-------------|---------------------------|-----------|----------|---------------|----|--------|---------------|---------------|--------|---------------|-----------------|
| STAGE1-3 | 24   | 0.385 0.386 | 428 533 168 1679 2133 657 | 1129 4469 | 0.00     | 0.9440175     | 1  | 1.00   | 0.91          | 1.10          | 1.01   | 0.83          | 1.22            |
| STAGE1-2 | 6    | 0.361 0.384 | 245 277 78 1078 1366 416  | 600 2860  | 2.33     | 0.127         | 1  | 1.11   | 0.97          | 1.26          | 1.22   | 0.94          | 1.59            |
| STAGE2   | 6    | 0.361 0.384 | 245 277 78 1078 1366 416  | 600 2860  | 2.33     | 0.127         | 1  | 1.11   | 0.97          | 1.26          | 1.22   | 0.94          | 1.59            |
| CPSII    | 10   | 0.369 0.413 | 18 17 7 96 179 41         | 42 316    | 0.68     | 0.4083213     | 1  | 1.24   | 0.75          | 2.05          | 1.53   | 0.56          | 4.20            |
| PBCS1    | 16   | 0.384 0.375 | 67 99 23 140 161 52       | 189 353   | 0.07     | 0.7876051     | 1  | 0.96   | 0.74          | 1.25          | 0.93   | 0.55          | 1.57            |
| PLCO     | 6    | 0.338 0.394 | 30 38 6 170 203 75        | 74 448    | 1.65     | 0.1995048     | 1  | 1.27   | 0.88          | 1.82          | 1.61   | 0.78          | 3.31            |
| WHI      | 8    | 0.351 0.378 | 130 123 42 672 823 248    | 295 1743  | 1.62     | 0.203473      | 1  | 1.13   | 0.94          | 1.35          | 1.27   | 0.88          | 1.82            |
| STAGE3   | 8    | 0.412 0.388 | 183 257 90 601 769 241    | 530 1611  | 1.93     | 0.1648011     | 1  | 0.90   | 0.79          | 1.04          | 0.82   | 0.62          | 1.09            |
| NHS2     | 1    | 0.439 0.369 | 33 35 22 134 171 43       | 90 348    | 2.92     | 0.0876378     | 1  | 0.75   | 0.54          | 1.04          | 0.56   | 0.29          | 1.09            |
| PBCS2    | 15   | 0.411 0.398 | 111 181 50 263 330 118    | 342 711   | 0.32     | 0.5733975     | 1  | 0.95   | 0.79          | 1.14          | 0.90   | 0.62          | 1.30            |
| WHS      | 21   | 0.393 0.388 | 39 41 18 204 268 80       | 98 552    | 0.02     | 0.8909936     | 1  | 0.98   | 0.72          | 1.34          | 0.96   | 0.51          | 1.78            |
| PBCS 1+2 | 15   | 0.401 0.390 | 178 279 73 403 489 170    | 530 1062  | 0.34     | 0.560426      | 1  | 0.96   | 0.82          | 1.11          | 0.91   | 0.68          | 1.24            |

**unadj\_re**

Locus Alleles Chr Location Neighborhood  
rs12608723 A|G 19q13.11 38508973

| SUBSET   | Rank | MAF         | Geno Counts              | Subjects  | score X2 | score p-value | df | hom OR | hom OR 95% CI | hom OR 95% CI_u |
|----------|------|-------------|--------------------------|-----------|----------|---------------|----|--------|---------------|-----------------|
| STAGE1-3 | 1    | 0.131 0.121 | 1001 279 33 4075 1120 78 | 1313 5273 | 6.78     | 0.0091966     | 1  | 0.58   | 0.39          | 0.88            |
| NHS      | 6    | 0.156 0.121 | 127 55 1 624 169 13      | 183 806   | 1.22     | 0.2702566     | 1  | 2.98   | 0.39          | 22.95           |
| STAGE1-2 | 1    | 0.143 0.121 | 581 180 22 2831 783 52   | 783 3666  | 7.64     | 0.0057236     | 1  | 0.50   | 0.30          | 0.82            |
| STAGE2   | 1    | 0.139 0.121 | 454 125 21 2207 614 39   | 600 2860  | 13.28    | 2.68E-04      | 1  | 0.38   | 0.22          | 0.65            |
| CPSII    | 2    | 0.131 0.114 | 33 7 2 250 60 6          | 42 316    | 1.39     | 0.2382208     | 1  | 0.39   | 0.08          | 1.98            |
| PBCS1    | 6    | 0.135 0.110 | 142 43 4 278 72 3        | 189 353   | 1.55     | 0.2132974     | 1  | 0.40   | 0.09          | 1.79            |
| PLCO     | 1    | 0.162 0.116 | 57 10 7 348 96 4         | 74 448    | 22.59    | 2.00E-06      | 1  | 0.09   | 0.02          | 0.30            |
| WHI      | 8    | 0.137 0.126 | 222 65 8 1331 386 26     | 295 1743  | 2.29     | 0.1302269     | 1  | 0.54   | 0.24          | 1.21            |
| STAGE3   | 18   | 0.115 0.122 | 420 100 11 1244 340 26   | 531 1610  | 0.49     | 0.4837902     | 1  | 0.78   | 0.38          | 1.58            |
| NHS2     | 2    | 0.132 0.117 | 71 16 4 272 72 5         | 91 349    | 3.16     | 0.0753427     | 1  | 0.32   | 0.08          | 1.20            |
| PBCS2    | 11   | 0.102 0.119 | 276 62 4 554 145 12      | 342 711   | 0.41     | 0.5197661     | 1  | 1.45   | 0.46          | 4.53            |
| WHS      | 14   | 0.143 0.128 | 73 22 3 418 123 9        | 98 550    | 0.93     | 0.3350925     | 1  | 0.53   | 0.14          | 1.98            |
| PBCS 1+2 | 22   | 0.113 0.115 | 418 104 8 832 214 15     | 530 1061  | 0.02     | 0.8802202     | 1  | 0.94   | 0.39          | 2.22            |

Locus Alleles Chr Location Neighborhood  
rs9491859 C|A 6q22.33 128106056 C6orf190

| SUBSET   | Rank | MAF         | Geno Counts               | Subjects  | score X2 | score p-value | df | hom OR | hom OR 95% CI | hom OR 95% CI_u |
|----------|------|-------------|---------------------------|-----------|----------|---------------|----|--------|---------------|-----------------|
| STAGE1-3 | 2    | 0.357 0.376 | 534 613 160 2089 2392 784 | 1307 5265 | 5.97     | 0.0145242     | 1  | 1.25   | 1.05          | 1.50            |
| NHS      | 16   | 0.388 0.375 | 67 90 26 325 359 123      | 183 807   | 0.12     | 0.7239492     | 1  | 1.09   | 0.69          | 1.72            |
| STAGE1-2 | 9    | 0.372 0.376 | 308 368 107 1462 1649 555 | 783 3666  | 1.11     | 0.2928742     | 1  | 1.13   | 0.90          | 1.41            |
| STAGE2   | 7    | 0.367 0.377 | 241 278 81 1137 1290 432  | 600 2859  | 1.02     | 0.3130128     | 1  | 1.14   | 0.88          | 1.47            |
| CPSII    | 24   | 0.274 0.351 | 19 23 0 137 136 43        | 42 316    |          |               |    |        |               |                 |
| PBCS1    | 21   | 0.354 0.364 | 83 78 28 147 154 51       | 189 352   | 0.01     | 0.9184164     | 1  | 0.97   | 0.59          | 1.60            |
| PLCO     | 14   | 0.378 0.376 | 29 34 11 170 219 59       | 74 448    | 0.16     | 0.6917663     | 1  | 0.87   | 0.43          | 1.74            |
| WHI      | 14   | 0.385 0.384 | 110 143 42 683 781 279    | 295 1743  | 0.60     | 0.4403449     | 1  | 1.15   | 0.81          | 1.63            |
| STAGE3   | 2    | 0.335 0.375 | 226 245 53 628 743 229    | 524 1600  | 6.04     | 0.0139727     | 1  | 1.48   | 1.08          | 2.04            |

|          |    |             |                        |          |      |           |   |      |      |      |
|----------|----|-------------|------------------------|----------|------|-----------|---|------|------|------|
| NHS2     | 11 | 0.349 0.366 | 36 40 10 147 152 53    | 86 352   | 0.66 | 0.4166072 | 1 | 1.35 | 0.66 | 2.77 |
| PBCS2    | 2  | 0.335 0.365 | 146 160 34 286 322 96  | 340 704  | 2.78 | 0.0953901 | 1 | 1.42 | 0.94 | 2.15 |
| WHS      | 5  | 0.321 0.394 | 44 45 9 195 269 80     | 98 544   | 2.12 | 0.1453241 | 1 | 1.71 | 0.83 | 3.52 |
| PBCS 1+2 | 5  | 0.342 0.365 | 229 238 62 432 476 147 | 529 1055 | 1.51 | 0.2195817 | 1 | 1.22 | 0.89 | 1.67 |

Locus Alleles Chr Location Neighborhood  
rs11249433 T|C 1p11.2 120982136 LOC647121

| SUBSET   | Rank | MAF         | Geno Counts                | Subjects  | score X2 | score p-value | df | hom OR | hom OR 95% CI_l | hom OR 95% CI_u |
|----------|------|-------------|----------------------------|-----------|----------|---------------|----|--------|-----------------|-----------------|
| STAGE1-3 | 3    | 0.399 0.439 | 478 610 215 1655 2556 1017 | 1303 5228 | 5.94     | 0.0147934     | 1  | 1.22   | 1.04            | 1.44            |
| NHS      | 15   | 0.412 0.448 | 65 84 33 238 411 155       | 182 804   | 0.13     | 0.7221251     | 1  | 1.08   | 0.71            | 1.63            |
| STAGE1-2 | 2    | 0.407 0.441 | 271 383 126 1124 1831 695  | 780 3650  | 3.55     | 0.0596037     | 1  | 1.22   | 0.99            | 1.50            |
| STAGE2   | 2    | 0.406 0.439 | 206 299 93 886 1420 540    | 598 2846  | 3.86     | 0.0495164     | 1  | 1.27   | 1.00            | 1.62            |
| CPSII    | 1    | 0.524 0.405 | 8 24 10 108 159 48         | 42 315    | 2.00     | 0.1572011     | 1  | 0.58   | 0.27            | 1.25            |
| PBCS1    | 14   | 0.392 0.407 | 67 96 26 124 171 58        | 189 353   | 0.67     | 0.4123345     | 1  | 1.23   | 0.75            | 2.03            |
| PLCO     | 19   | 0.411 0.427 | 26 34 13 140 232 75        | 73 447    | 0.05     | 0.8277862     | 1  | 0.93   | 0.49            | 1.78            |
| WHI      | 2    | 0.396 0.455 | 105 145 44 514 858 359     | 294 1731  | 5.26     | 0.0218816     | 1  | 1.49   | 1.06            | 2.09            |
| STAGE3   | 4    | 0.387 0.434 | 207 227 89 531 725 322     | 523 1578  | 2.87     | 0.0904653     | 1  | 1.25   | 0.97            | 1.62            |
| NHS2     | 22   | 0.450 0.440 | 29 41 20 114 152 73        | 90 339    | 0.02     | 0.8879734     | 1  | 0.96   | 0.55            | 1.68            |
| PBCS2    | 7    | 0.372 0.410 | 137 149 51 246 324 121     | 337 691   | 0.92     | 0.3377601     | 1  | 1.19   | 0.83            | 1.70            |
| WHS      | 12   | 0.380 0.461 | 41 37 18 171 249 128       | 96 548    | 0.99     | 0.3199196     | 1  | 1.32   | 0.76            | 2.29            |
| PBCS 1+2 | 4    | 0.379 0.409 | 204 245 77 370 495 179     | 526 1044  | 1.61     | 0.2044044     | 1  | 1.21   | 0.90            | 1.61            |

Locus Alleles Chr Location Neighborhood  
rs2067980 A|G 5p12 45018074

| SUBSET   | Rank | MAF         | Geno Counts              | Subjects  | score X2 | score p-value | df | hom OR | hom OR 95% CI_l | hom OR 95% CI_u |
|----------|------|-------------|--------------------------|-----------|----------|---------------|----|--------|-----------------|-----------------|
| STAGE1-3 | 4    | 0.164 0.176 | 915 363 34 3610 1460 197 | 1312 5267 | 4.09     | 0.0430948     | 1  | 1.46   | 1.01            | 2.11            |
| NHS      | 19   | 0.172 0.179 | 125 53 5 542 240 24      | 183 806   | 0.03     | 0.8589934     | 1  | 1.09   | 0.41            | 2.90            |
| STAGE1-2 | 17   | 0.173 0.176 | 538 219 26 2510 1021 135 | 783 3666  | 0.24     | 0.6225412     | 1  | 1.11   | 0.73            | 1.71            |
| STAGE2   | 15   | 0.173 0.175 | 413 166 21 1968 781 111  | 600 2860  | 0.20     | 0.6577105     | 1  | 1.11   | 0.69            | 1.79            |
| CPSII    | 14   | 0.190 0.171 | 28 12 2 221 82 13        | 42 316    | 0.04     | 0.843894      | 1  | 0.86   | 0.19            | 3.94            |
| PBCS1    | 11   | 0.251 0.231 | 107 69 13 208 127 18     | 189 353   | 0.72     | 0.3953013     | 1  | 0.73   | 0.35            | 1.52            |
| PLCO     | 9    | 0.122 0.156 | 57 16 1 322 112 14       | 74 448    | 0.72     | 0.3975117     | 1  | 2.35   | 0.31            | 18.18           |
| WHI      | 5    | 0.134 0.170 | 221 69 5 1217 460 66     | 295 1743  | 3.28     | 0.0700099     | 1  | 2.28   | 0.91            | 5.71            |
| STAGE3   | 1    | 0.151 0.176 | 377 144 8 1100 440 62    | 529 1602  | 6.96     | 0.0083383     | 1  | 2.62   | 1.25            | 5.51            |
| NHS2     | 23   | 0.148 0.162 | 62 26 0 249 82 15        | 88 346    |          |               |    |        |                 |                 |
| PBCS2    | 4    | 0.156 0.188 | 243 93 7 467 211 27      | 343 705   | 2.35     | 0.1250803     | 1  | 1.91   | 0.82            | 4.43            |
| WHS      | 7    | 0.138 0.170 | 72 25 1 384 147 20       | 98 551    | 1.81     | 0.1785925     | 1  | 3.65   | 0.48            | 27.54           |
| PBCS 1+2 | 16   | 0.190 0.202 | 350 162 20 675 337 45    | 532 1057  | 0.22     | 0.6362782     | 1  | 1.14   | 0.67            | 1.95            |

Locus Alleles Chr Location Neighborhood  
rs3817198 T|C 11p15.5 1865582 LSP1

| SUBSET   | Rank | MAF         | Geno Counts               | Subjects  | score X2 | score p-value | df | hom OR | hom OR 95% CI_l | hom OR 95% CI_u |
|----------|------|-------------|---------------------------|-----------|----------|---------------|----|--------|-----------------|-----------------|
| STAGE1-3 | 5    | 0.323 0.335 | 592 587 129 2368 2287 625 | 1308 5280 | 4.03     | 0.0446069     | 1  | 1.23   | 1.00            | 1.50            |
| NHS      | 2    | 0.308 0.328 | 82 88 12 373 339 95       | 182 807   | 4.13     | 0.0421858     | 1  | 1.89   | 1.01            | 3.53            |
| STAGE1-2 | 3    | 0.335 0.337 | 336 366 78 1631 1595 436  | 780 3662  | 2.28     | 0.1307875     | 1  | 1.22   | 0.94            | 1.57            |
| STAGE2   | 10   | 0.343 0.339 | 254 278 66 1258 1256 341  | 598 2855  | 0.39     | 0.5315952     | 1  | 1.09   | 0.83            | 1.45            |
| CPSII    | 10   | 0.381 0.340 | 16 20 6 139 138 38        | 42 315    | 0.17     | 0.6806829     | 1  | 0.82   | 0.33            | 2.08            |
| PBCS1    | 15   | 0.321 0.326 | 84 86 17 161 150 39       | 187 350   | 0.55     | 0.4585656     | 1  | 1.25   | 0.69            | 2.28            |
| PLCO     | 15   | 0.365 0.334 | 28 38 8 190 215 42        | 74 447    | 0.15     | 0.7019153     | 1  | 0.86   | 0.38            | 1.90            |
| WHI      | 17   | 0.346 0.343 | 126 134 35 768 753 222    | 295 1743  | 0.17     | 0.6764183     | 1  | 1.08   | 0.74            | 1.59            |
| STAGE3   | 8    | 0.308 0.331 | 255 222 52 734 693 189    | 529 1616  | 1.39     | 0.2382438     | 1  | 1.21   | 0.88            | 1.68            |
| NHS2     | 18   | 0.264 0.331 | 52 30 9 162 155 41        | 91 358    | 0.18     | 0.6722477     | 1  | 1.18   | 0.55            | 2.52            |
| PBCS2    | 21   | 0.333 0.330 | 154 148 40 326 301 84     | 342 711   | 0.00     | 0.9554698     | 1  | 1.01   | 0.68            | 1.51            |
| WHS      | 1    | 0.260 0.334 | 49 44 3 246 237 64        | 96 547    | 6.43     | 0.0111977     | 1  | 4.11   | 1.26            | 13.35           |

PBCS 1+2 14 0.327|0.327 239|233|56/490|450|123 528|1063 0.33 0.5662589 1 1.10 0.79 1.54

Locus Alleles Chr Location Neighborhood  
rs7716600 C|A 5p12 44910762

| SUBSET   | Rank | MAF         | Geno Counts              | Subjects  | score X2 | score p-value | df | hom OR | hom OR 95% CI_l | hom OR 95% CI_u |
|----------|------|-------------|--------------------------|-----------|----------|---------------|----|--------|-----------------|-----------------|
| STAGE1-3 | 6    | 0.221 0.243 | 800 446 67 3042 1901 333 | 1313 5276 | 2.69     | 0.100724      | 1  | 1.25   | 0.96            | 1.64            |
| NHS      | 12   | 0.246 0.253 | 108 60 15 451 303 53     | 183 807   | 0.62     | 0.4314343     | 1  | 0.79   | 0.43            | 1.43            |
| STAGE1-2 | 7    | 0.227 0.249 | 473 265 45 2095 1316 253 | 783 3664  | 1.38     | 0.2395144     | 1  | 1.22   | 0.88            | 1.69            |
| STAGE2   | 3    | 0.221 0.247 | 365 205 30 1644 1013 200 | 600 2857  | 3.19     | 0.073872      | 1  | 1.43   | 0.96            | 2.12            |
| CPSII    | 18   | 0.226 0.241 | 26 13 3 186 108 22       | 42 316    | 0.00     | 0.9655414     | 1  | 0.97   | 0.28            | 3.40            |
| PBCS1    | 18   | 0.272 0.272 | 99 77 13 186 139 26      | 189 351   | 0.05     | 0.8207719     | 1  | 1.08   | 0.54            | 2.16            |
| PLCO     | 18   | 0.169 0.232 | 52 19 3 261 166 21       | 74 448    | 0.06     | 0.8095283     | 1  | 1.16   | 0.34            | 4.00            |
| WHI      | 1    | 0.200 0.247 | 188 96 11 1011 600 131   | 295 1742  | 5.59     | 0.018047      | 1  | 2.10   | 1.12            | 3.93            |
| STAGE3   | 17   | 0.212 0.231 | 327 181 22 948 587 79    | 530 1614  | 0.49     | 0.4831988     | 1  | 1.19   | 0.73            | 1.93            |
| NHS2     | 10   | 0.261 0.232 | 49 35 6 205 131 16       | 90 352    | 0.68     | 0.4089424     | 1  | 0.67   | 0.25            | 1.76            |
| PBCS2    | 3    | 0.195 0.233 | 219 111 11 417 254 38    | 341 709   | 2.36     | 0.1247522     | 1  | 1.70   | 0.86            | 3.37            |
| WHS      | 20   | 0.227 0.228 | 59 35 5 326 202 25       | 99 553    | 0.05     | 0.8167877     | 1  | 0.89   | 0.33            | 2.38            |
| PBCS 1+2 | 2    | 0.223 0.246 | 318 188 24 602 391 65    | 530 1058  | 1.74     | 0.1869294     | 1  | 1.38   | 0.85            | 2.23            |

Locus Alleles Chr Location Neighborhood  
rs2391406 T|G 13q33.3 106586873

| SUBSET   | Rank | MAF         | Geno Counts               | Subjects  | score X2 | score p-value | df | hom OR | hom OR 95% CI_l | hom OR 95% CI_u |
|----------|------|-------------|---------------------------|-----------|----------|---------------|----|--------|-----------------|-----------------|
| STAGE1-3 | 7    | 0.359 0.367 | 521 636 152 2088 2463 694 | 1309 5245 | 2.44     | 0.1179233     | 1  | 1.16   | 0.96            | 1.40            |
| NHS      | 11   | 0.358 0.366 | 72 91 20 323 377 107      | 183 807   | 0.72     | 0.3947659     | 1  | 1.25   | 0.75            | 2.07            |
| STAGE1-2 | 12   | 0.355 0.363 | 314 380 87 1453 1759 451  | 781 3663  | 0.83     | 0.3616764     | 1  | 1.12   | 0.88            | 1.43            |
| STAGE2   | 11   | 0.354 0.362 | 242 289 67 1130 1382 344  | 598 2856  | 0.33     | 0.5636358     | 1  | 1.09   | 0.82            | 1.43            |
| CPSII    | 19   | 0.402 0.339 | 12 25 4 132 150 31        | 41 313    | 0.00     | 0.9761748     | 1  | 1.02   | 0.34            | 3.04            |
| PBCS1    | 7    | 0.362 0.375 | 78 84 26 125 190 37       | 188 352   | 1.31     | 0.2524888     | 1  | 0.73   | 0.43            | 1.25            |
| PLCO     | 6    | 0.345 0.360 | 29 39 6 180 213 55        | 74 448    | 1.07     | 0.3010777     | 1  | 1.59   | 0.66            | 3.83            |
| WHI      | 10   | 0.344 0.365 | 123 141 31 693 829 221    | 295 1743  | 1.10     | 0.2948808     | 1  | 1.24   | 0.83            | 1.84            |
| STAGE3   | 3    | 0.365 0.376 | 207 255 65 635 705 243    | 527 1583  | 2.89     | 0.0893461     | 1  | 1.29   | 0.96            | 1.73            |
| NHS2     | 4    | 0.348 0.402 | 37 42 10 129 162 60       | 89 351    | 1.82     | 0.1771703     | 1  | 1.63   | 0.80            | 3.33            |
| PBCS2    | 8    | 0.382 0.381 | 126 171 45 275 321 108    | 342 704   | 0.88     | 0.3486356     | 1  | 1.20   | 0.82            | 1.74            |
| WHS      | 11   | 0.323 0.352 | 44 42 10 231 222 75       | 96 528    | 0.99     | 0.3196092     | 1  | 1.42   | 0.71            | 2.86            |
| PBCS 1+2 | 20   | 0.375 0.379 | 204 256 71 400 510 145    | 531 1055  | 0.04     | 0.8380202     | 1  | 1.03   | 0.76            | 1.40            |

Locus Alleles Chr Location Neighborhood  
rs998592 G|A 16p13.13 11107179 CLEC16A

| SUBSET   | Rank | MAF         | Geno Counts               | Subjects  | score X2 | score p-value | df | hom OR | hom OR 95% CI_l | hom OR 95% CI_u |
|----------|------|-------------|---------------------------|-----------|----------|---------------|----|--------|-----------------|-----------------|
| STAGE1-3 | 8    | 0.405 0.418 | 452 660 202 1751 2638 885 | 1314 5274 | 1.51     | 0.2187395     | 1  | 1.11   | 0.94            | 1.31            |
| NHS      | 17   | 0.434 0.429 | 54 99 30 253 415 139      | 183 807   | 0.07     | 0.7873892     | 1  | 1.06   | 0.69            | 1.63            |
| STAGE1-2 | 4    | 0.402 0.425 | 270 396 117 1181 1857 629 | 783 3667  | 2.26     | 0.1328082     | 1  | 1.18   | 0.95            | 1.46            |
| STAGE2   | 4    | 0.393 0.423 | 216 297 87 928 1442 490   | 600 2860  | 2.47     | 0.11573       | 1  | 1.22   | 0.95            | 1.56            |
| CPSII    | 9    | 0.369 0.416 | 17 19 6 107 155 54        | 42 316    | 0.21     | 0.6477343     | 1  | 1.24   | 0.50            | 3.08            |
| PBCS1    | 17   | 0.368 0.368 | 74 91 24 141 164 48       | 189 353   | 0.09     | 0.7687734     | 1  | 1.08   | 0.64            | 1.83            |
| PLCO     | 8    | 0.426 0.393 | 25 35 14 162 220 66       | 74 448    | 0.86     | 0.3543321     | 1  | 0.74   | 0.39            | 1.40            |
| WHI      | 6    | 0.403 0.444 | 100 152 43 518 903 322    | 295 1743  | 2.61     | 0.1063954     | 1  | 1.33   | 0.94            | 1.88            |
| STAGE3   | 24   | 0.409 0.402 | 182 265 85 570 782 256    | 532 1608  | 0.00     | 0.9751398     | 1  | 1.00   | 0.76            | 1.30            |
| NHS2     | 14   | 0.483 0.423 | 22 47 19 119 167 65       | 88 351    | 0.43     | 0.5123624     | 1  | 0.83   | 0.46            | 1.47            |
| PBCS2    | 22   | 0.397 0.386 | 122 171 51 266 333 105    | 344 704   | 0.00     | 0.969615      | 1  | 1.01   | 0.70            | 1.45            |
| WHS      | 22   | 0.385 0.410 | 38 47 15 185 282 86       | 100 553   | 0.02     | 0.8883704     | 1  | 1.04   | 0.58            | 1.89            |
| PBCS 1+2 | 19   | 0.386 0.380 | 196 261 75 407 496 153    | 532 1056  | 0.04     | 0.8339265     | 1  | 1.03   | 0.77            | 1.39            |

Locus Alleles Chr Location Neighborhood

| rs11077820 | T C     | 17q25.1     | 71966263                  | UBE2O,AANAT  |          |               |    |        |                 |                 |  |  |  |  |
|------------|---------|-------------|---------------------------|--------------|----------|---------------|----|--------|-----------------|-----------------|--|--|--|--|
| SUBSET     | Rank    | MAF         | Geno Counts               | Subjects     | score X2 | score p-value | df | hom OR | hom OR 95% CI_l | hom OR 95% CI_u |  |  |  |  |
| STAGE1-3   | 9       | 0.359 0.367 | 543 598 173 2153 2342 760 | 1314 5255    | 1.45     | 0.2285284     | 1  | 1.12   | 0.93            | 1.33            |  |  |  |  |
| NHS        | 18      | 0.374 0.374 | 73 83 27 329 353 125      | 183 807      | 0.06     | 0.8032534     | 1  | 1.06   | 0.67            | 1.66            |  |  |  |  |
| STAGE1-2   | 5       | 0.361 0.368 | 318 364 101 1502 1623 538 | 783 3663     | 1.68     | 0.1954078     | 1  | 1.16   | 0.93            | 1.46            |  |  |  |  |
| STAGE2     | 5       | 0.357 0.367 | 245 281 74 1173 1270 413  | 600 2856     | 1.85     | 0.1733419     | 1  | 1.20   | 0.92            | 1.57            |  |  |  |  |
| CPSII      | 12      | 0.357 0.359 | 17 20 5 131 143 42        | 42 316       | 0.06     | 0.8026221     | 1  | 1.13   | 0.42            | 3.05            |  |  |  |  |
| PBCS1      | 10      | 0.381 0.334 | 74 86 29 160 150 43       | 189 353      | 1.07     | 0.3012162     | 1  | 0.77   | 0.46            | 1.27            |  |  |  |  |
| PLCO       | 20      | 0.358 0.354 | 30 35 9 188 200 58        | 74 446       | 0.04     | 0.8412475     | 1  | 1.08   | 0.51            | 2.28            |  |  |  |  |
| WHI        | 3       | 0.342 0.378 | 124 140 31 694 777 270    | 295 1741     | 5.01     | 0.0252669     | 1  | 1.56   | 1.05            | 2.32            |  |  |  |  |
| STAGE3     | 21      | 0.356 0.365 | 225 234 72 651 720 222    | 531 1593     | 0.05     | 0.8276979     | 1  | 1.03   | 0.78            | 1.37            |  |  |  |  |
| NHS2       | 17      | 0.337 0.373 | 43 32 14 136 163 48       | 89 347       | 0.21     | 0.6474946     | 1  | 0.86   | 0.45            | 1.64            |  |  |  |  |
| PBCS2      | 20      | 0.366 0.382 | 141 153 49 269 335 102    | 343 706      | 0.00     | 0.9441424     | 1  | 1.01   | 0.70            | 1.46            |  |  |  |  |
| WHS        | 10      | 0.338 0.339 | 41 49 9 246 222 72        | 99 540       | 1.36     | 0.2434833     | 1  | 1.54   | 0.74            | 3.19            |  |  |  |  |
| PBCS 1+2   | 15      | 0.371 0.366 | 215 239 78 429 484 145    | 532 1058     | 0.27     | 0.6042597     | 1  | 0.92   | 0.69            | 1.24            |  |  |  |  |
| Locus      | Alleles | Chr         | Location                  | Neighborhood |          |               |    |        |                 |                 |  |  |  |  |
| rs7936636  | C T     | 11p11.2     |                           | 44397546     |          |               |    |        |                 |                 |  |  |  |  |
| SUBSET     | Rank    | MAF         | Geno Counts               | Subjects     | score X2 | score p-value | df | hom OR | hom OR 95% CI_l | hom OR 95% CI_u |  |  |  |  |
| STAGE1-3   | 10      | 0.234 0.249 | 773 464 75 2989 1934 347  | 1312 5270    | 1.32     | 0.2507822     | 1  | 1.16   | 0.90            | 1.50            |  |  |  |  |
| NHS        | 3       | 0.219 0.247 | 110 66 7 470 276 61       | 183 807      | 3.25     | 0.071384      | 1  | 2.06   | 0.92            | 4.57            |  |  |  |  |
| STAGE1-2   | 10      | 0.226 0.245 | 474 264 45 2117 1303 246  | 783 3666     | 0.98     | 0.3224038     | 1  | 1.18   | 0.85            | 1.64            |  |  |  |  |
| STAGE2     | 21      | 0.228 0.244 | 364 198 38 1647 1027 185  | 600 2859     | 0.02     | 0.9008035     | 1  | 1.02   | 0.71            | 1.47            |  |  |  |  |
| CPSII      | 6       | 0.274 0.222 | 23 15 4 197 98 21         | 42 316       | 0.47     | 0.491696      | 1  | 0.68   | 0.22            | 2.08            |  |  |  |  |
| PBCS1      | 19      | 0.228 0.229 | 115 62 12 212 119 21      | 189 352      | 0.03     | 0.8590356     | 1  | 0.94   | 0.45            | 1.95            |  |  |  |  |
| PLCO       | 11      | 0.243 0.253 | 45 22 7 254 161 33        | 74 448       | 0.39     | 0.5305468     | 1  | 0.76   | 0.32            | 1.79            |  |  |  |  |
| WHI        | 11      | 0.219 0.249 | 181 99 15 984 649 110     | 295 1743     | 0.66     | 0.4169429     | 1  | 1.26   | 0.72            | 2.19            |  |  |  |  |
| STAGE3     | 19      | 0.246 0.259 | 299 200 30 872 631 100    | 529 1603     | 0.22     | 0.6363847     | 1  | 1.11   | 0.73            | 1.69            |  |  |  |  |
| NHS2       | 12      | 0.233 0.241 | 51 33 4 204 123 23        | 88 350       | 0.50     | 0.4799467     | 1  | 1.48   | 0.50            | 4.39            |  |  |  |  |
| PBCS2      | 16      | 0.265 0.268 | 185 133 24 372 282 47     | 342 701      | 0.04     | 0.8506351     | 1  | 0.95   | 0.57            | 1.59            |  |  |  |  |
| WHS        | 6       | 0.192 0.259 | 63 34 2 296 226 30        | 99 552       | 2.09     | 0.1478725     | 1  | 2.79   | 0.66            | 11.86           |  |  |  |  |
| PBCS 1+2   | 21      | 0.251 0.256 | 300 195 36 584 401 69     | 531 1054     | 0.03     | 0.8601604     | 1  | 0.96   | 0.63            | 1.46            |  |  |  |  |
| Locus      | Alleles | Chr         | Location                  | Neighborhood |          |               |    |        |                 |                 |  |  |  |  |
| rs17740709 | A G     | 12q21.31    |                           | 81947471     | TMTC2    |               |    |        |                 |                 |  |  |  |  |
| SUBSET     | Rank    | MAF         | Geno Counts               | Subjects     | score X2 | score p-value | df | hom OR | hom OR 95% CI_l | hom OR 95% CI_u |  |  |  |  |
| STAGE1-3   | 11      | 0.209 0.219 | 828 417 65 3251 1707 300  | 1310 5258    | 1.11     | 0.2930975     | 1  | 1.16   | 0.88            | 1.53            |  |  |  |  |
| NHS        | 1       | 0.180 0.222 | 121 58 4 502 251 54       | 183 807      | 5.49     | 0.0191173     | 1  | 3.21   | 1.15            | 8.98            |  |  |  |  |
| STAGE1-2   | 15      | 0.210 0.216 | 494 249 40 2293 1165 209  | 783 3667     | 0.43     | 0.5136986     | 1  | 1.12   | 0.79            | 1.59            |  |  |  |  |
| STAGE2     | 12      | 0.219 0.214 | 373 191 36 1791 914 155   | 600 2860     | 0.32     | 0.5713954     | 1  | 0.90   | 0.62            | 1.30            |  |  |  |  |
| CPSII      | 5       | 0.131 0.199 | 32 9 1 205 96 15          | 42 316       | 0.49     | 0.4857052     | 1  | 2.04   | 0.26            | 15.88           |  |  |  |  |
| PBCS1      | 20      | 0.254 0.245 | 106 70 13 203 127 23      | 189 353      | 0.03     | 0.8716124     | 1  | 0.94   | 0.47            | 1.91            |  |  |  |  |
| PLCO       | 13      | 0.209 0.218 | 48 21 5 277 147 24        | 74 448       | 0.24     | 0.6263005     | 1  | 0.78   | 0.29            | 2.12            |  |  |  |  |
| WHI        | 19      | 0.212 0.209 | 187 91 17 1106 544 93     | 295 1743     | 0.09     | 0.7640171     | 1  | 0.92   | 0.54            | 1.57            |  |  |  |  |
| STAGE3     | 15      | 0.207 0.228 | 334 168 25 958 544 91     | 527 1593     | 0.72     | 0.3966789     | 1  | 1.22   | 0.77            | 1.92            |  |  |  |  |
| NHS2       | 16      | 0.206 0.211 | 55 25 5 214 112 16        | 85 342       | 0.21     | 0.6459501     | 1  | 0.79   | 0.28            | 2.21            |  |  |  |  |
| PBCS2      | 5       | 0.212 0.254 | 215 109 18 398 260 50     | 342 708      | 1.23     | 0.2669774     | 1  | 1.37   | 0.79            | 2.38            |  |  |  |  |
| WHS        | 9       | 0.190 0.204 | 64 34 2 346 172 25        | 100 543      | 1.42     | 0.2328239     | 1  | 2.36   | 0.55            | 10.15           |  |  |  |  |
| PBCS 1+2   | 11      | 0.227 0.251 | 321 179 31 601 385 73     | 531 1059     | 0.64     | 0.4221786     | 1  | 1.19   | 0.77            | 1.84            |  |  |  |  |
| Locus      | Alleles | Chr         | Location                  | Neighborhood |          |               |    |        |                 |                 |  |  |  |  |
| rs12622050 | G A     | 2q11.2      |                           | 100945886    | NPAS2    |               |    |        |                 |                 |  |  |  |  |
| SUBSET     | Rank    | MAF         | Geno Counts               | Subjects     | score X2 | score p-value | df | hom OR | hom OR 95% CI_l | hom OR 95% CI_u |  |  |  |  |

|          |    |             |                          |           |      |           |   |      |      |      |
|----------|----|-------------|--------------------------|-----------|------|-----------|---|------|------|------|
| STAGE1-3 | 12 | 0.223 0.208 | 795 444 70 3307 1695 246 | 1309 5248 | 1.00 | 0.3184759 | 1 | 0.87 | 0.66 | 1.14 |
| NHS      | 9  | 0.191 0.189 | 122 52 9 529 251 27      | 183 807   | 1.05 | 0.3049532 | 1 | 0.67 | 0.31 | 1.45 |
| STAGE1-2 | 22 | 0.200 0.200 | 504 243 35 2361 1141 162 | 782 3664  | 0.00 | 0.9465864 | 1 | 0.99 | 0.68 | 1.43 |
| STAGE2   | 16 | 0.203 0.203 | 382 191 26 1832 890 135  | 599 2857  | 0.16 | 0.684622  | 1 | 1.09 | 0.71 | 1.68 |
| CPSII    | 21 | 0.146 0.213 | 29 12 0 201 94 20        | 41 315    |      |           |   |      |      |      |
| PBCS1    | 5  | 0.222 0.249 | 114 66 9 204 121 27      | 189 352   | 1.67 | 0.1956179 | 1 | 1.66 | 0.76 | 3.61 |
| PLCO     | 17 | 0.203 0.195 | 47 24 3 288 145 15       | 74 448    | 0.10 | 0.7578696 | 1 | 0.82 | 0.23 | 2.90 |
| WHI      | 16 | 0.198 0.194 | 192 89 14 1139 530 73    | 295 1742  | 0.19 | 0.6627648 | 1 | 0.88 | 0.49 | 1.58 |
| STAGE3   | 7  | 0.257 0.227 | 291 201 35 947 555 83    | 527 1585  | 1.48 | 0.2238399 | 1 | 0.78 | 0.52 | 1.17 |
| NHS2     | 19 | 0.206 0.215 | 53 29 3 210 117 15       | 85 342    | 0.12 | 0.7250508 | 1 | 1.25 | 0.35 | 4.43 |
| PBCS2    | 12 | 0.278 0.245 | 177 141 25 402 254 45    | 343 701   | 0.28 | 0.5978974 | 1 | 0.87 | 0.53 | 1.45 |
| WHS      | 8  | 0.227 0.212 | 61 31 7 335 184 23       | 99 542    | 1.50 | 0.2207027 | 1 | 0.58 | 0.24 | 1.40 |
| PBCS 1+2 | 17 | 0.258 0.247 | 291 207 34 605 374 73    | 532 1052  | 0.17 | 0.6813879 | 1 | 1.09 | 0.72 | 1.66 |

Locus Alleles Chr Location Neighborhood  
rs7121523 G|A 11p15.4 7556781 PPFIBP2

| SUBSET   | Rank | MAF         | Geno Counts              | Subjects  | score X2 | score p-value | df | hom OR | hom OR 95% CI_l | hom OR 95% CI_u |
|----------|------|-------------|--------------------------|-----------|----------|---------------|----|--------|-----------------|-----------------|
| STAGE1-3 | 13   | 0.162 0.161 | 925 353 36 3746 1354 170 | 1314 5270 | 0.82     | 0.3652097     | 1  | 1.18   | 0.82            | 1.70            |
| NHS      | 13   | 0.164 0.168 | 129 48 6 572 199 36      | 183 807   | 0.51     | 0.473729      | 1  | 1.38   | 0.57            | 3.32            |
| STAGE1-2 | 19   | 0.176 0.161 | 533 223 26 2613 923 129  | 782 3665  | 0.07     | 0.7872606     | 1  | 1.06   | 0.69            | 1.63            |
| STAGE2   | 22   | 0.179 0.159 | 404 175 20 2041 724 93   | 599 2858  | 0.01     | 0.9154093     | 1  | 0.97   | 0.60            | 1.59            |
| CPSII    | 3    | 0.183 0.171 | 29 9 3 220 84 12         | 41 316    | 1.12     | 0.2905896     | 1  | 0.50   | 0.14            | 1.85            |
| PBCS1    | 1    | 0.148 0.156 | 134 54 1 259 76 17       | 189 352   | 7.07     | 0.007836      | 1  | 9.54   | 1.26            | 72.26           |
| PLCO     | 10   | 0.230 0.160 | 41 32 1 318 117 13       | 74 448    | 0.58     | 0.4443909     | 1  | 2.18   | 0.28            | 16.93           |
| WHI      | 4    | 0.186 0.158 | 200 80 15 1244 447 51    | 295 1742  | 3.74     | 0.0529904     | 1  | 0.56   | 0.31            | 1.02            |
| STAGE3   | 14   | 0.141 0.160 | 392 130 10 1133 431 41   | 532 1605  | 0.78     | 0.3768196     | 1  | 1.37   | 0.68            | 2.75            |
| NHS2     | 20   | 0.154 0.153 | 65 24 2 254 88 10        | 91 352    | 0.11     | 0.7362234     | 1  | 1.30   | 0.28            | 6.05            |
| PBCS2    | 9    | 0.136 0.158 | 254 81 6 496 184 18      | 341 698   | 0.68     | 0.4091075     | 1  | 1.48   | 0.58            | 3.76            |
| WHS      | 21   | 0.145 0.167 | 73 25 2 383 159 13       | 100 555   | 0.04     | 0.8331488     | 1  | 1.18   | 0.26            | 5.29            |
| PBCS 1+2 | 1    | 0.141 0.157 | 388 135 7 755 260 35     | 530 1050  | 5.51     | 0.0188709     | 1  | 2.58   | 1.14            | 5.84            |

Locus Alleles Chr Location Neighborhood  
rs10941679 A|G 5p12 44742255

| SUBSET   | Rank | MAF         | Geno Counts            | Subjects | score X2 | score p-value | df | hom OR | hom OR 95% CI_l | hom OR 95% CI_u |
|----------|------|-------------|------------------------|----------|----------|---------------|----|--------|-----------------|-----------------|
| STAGE1-3 | 14   | 0.262 0.282 | 383 276 47 991 791 148 | 706 1930 | 0.77     | 0.3797438     | 1  | 1.16   | 0.83            | 1.64            |
| STAGE3   | 6    | 0.245 0.277 | 298 198 30 830 650 118 | 526 1598 | 1.72     | 0.1890937     | 1  | 1.32   | 0.87            | 1.99            |
| NHS2     | 21   | 0.262 0.283 | 49 29 8 181 137 30     | 86 348   | 0.04     | 0.8412763     | 1  | 0.92   | 0.41            | 2.08            |
| PBCS2    | 1    | 0.235 0.288 | 196 130 15 350 308 50  | 341 708  | 2.81     | 0.0937558     | 1  | 1.65   | 0.91            | 2.99            |
| WHS      | 23   | 0.268 0.259 | 53 39 7 299 205 38     | 99 542   | 0.00     | 0.9829612     | 1  | 0.99   | 0.43            | 2.29            |
| PBCS 1+2 | 10   | 0.261 0.293 | 281 208 32 511 449 80  | 521 1040 | 1.25     | 0.2630611     | 1  | 1.27   | 0.83            | 1.95            |

Locus Alleles Chr Location Neighborhood  
rs10850145 C|T 12q24.13 112428512

| SUBSET   | Rank | MAF         | Geno Counts              | Subjects  | score X2 | score p-value | df | hom OR | hom OR 95% CI_l | hom OR 95% CI_u |
|----------|------|-------------|--------------------------|-----------|----------|---------------|----|--------|-----------------|-----------------|
| STAGE1-3 | 15   | 0.108 0.109 | 1047 249 17 4185 1048 54 | 1313 5287 | 0.74     | 0.3901039     | 1  | 0.79   | 0.45            | 1.36            |
| NHS      | 4    | 0.117 0.108 | 145 33 5 642 155 10      | 183 807   | 2.23     | 0.1354767     | 1  | 0.45   | 0.15            | 1.32            |
| STAGE1-2 | 16   | 0.107 0.111 | 626 146 11 2898 724 43   | 783 3665  | 0.29     | 0.5911162     | 1  | 0.83   | 0.43            | 1.62            |
| STAGE2   | 19   | 0.104 0.111 | 481 113 6 2256 569 33    | 600 2858  | 0.11     | 0.7443222     | 1  | 1.16   | 0.48            | 2.77            |
| CPSII    | 8    | 0.071 0.111 | 37 4 1 250 62 4          | 42 316    | 0.33     | 0.5628733     | 1  | 0.53   | 0.06            | 4.82            |
| PBCS1    | 16   | 0.101 0.123 | 152 36 1 270 79 4        | 189 353   | 0.49     | 0.4833068     | 1  | 2.15   | 0.24            | 19.42           |
| PLCO     | 22   | 0.122 0.106 | 56 18 0 357 87 4         | 74 448    |          |               |    |        |                 |                 |
| WHI      | 21   | 0.107 0.110 | 236 55 4 1379 341 21     | 295 1741  | 0.05     | 0.8290362     | 1  | 0.89   | 0.30            | 2.61            |
| STAGE3   | 10   | 0.108 0.107 | 421 103 6 1289 324 11    | 530 1624  | 1.06     | 0.3042918     | 1  | 0.60   | 0.22            | 1.62            |
| NHS2     | 3    | 0.136 0.100 | 68 16 4 290 59 6         | 88 355    | 2.61     | 0.1064761     | 1  | 0.36   | 0.10            | 1.31            |



|          |    |             |                     |          |      |           |   |      |      |      |
|----------|----|-------------|---------------------|----------|------|-----------|---|------|------|------|
| PBCS2    | 15 | 0.105 0.107 | 273 68 2 565 143 5  | 343 713  | 0.05 | 0.8246128 | 1 | 1.20 | 0.23 | 6.24 |
| WHS      | 24 | 0.096 0.110 | 80 19 0 434 122 0   | 99 556   | -    |           | 1 | 1.00 | 1.00 | 1.00 |
| PBCS 1+2 | 13 | 0.103 0.113 | 425 104 3 833 222 9 | 532 1064 | 0.38 | 0.538761  | 1 | 1.50 | 0.41 | 5.58 |

Locus rs37936 Alleles A|G Chr 7q21.11 Location Neighborhood 79806994

| SUBSET   | Rank | MAF         | Geno Counts               | Subjects  | score X2 | score p-value | df | hom OR | hom OR 95% CI_l | hom OR 95% CI_u |
|----------|------|-------------|---------------------------|-----------|----------|---------------|----|--------|-----------------|-----------------|
| STAGE1-3 | 16   | 0.370 0.367 | 521 572 187 2078 2378 707 | 1280 5163 | 0.72     | 0.3961964     | 1  | 0.93   | 0.78            | 1.10            |
| NHS      | 8    | 0.369 0.362 | 77 68 31 333 343 115      | 176 791   | 1.06     | 0.3027554     | 1  | 0.80   | 0.51            | 1.23            |
| STAGE1-2 | 8    | 0.374 0.363 | 233 255 88 1325 1468 438  | 576 3231  | 1.22     | 0.2699911     | 1  | 0.87   | 0.68            | 1.11            |
| STAGE2   | 13   | 0.376 0.363 | 156 187 57 992 1125 323   | 400 2440  | 0.30     | 0.5814769     | 1  | 0.92   | 0.68            | 1.24            |
| CPSII    | 23   | 0.263 0.355 | 19 21 0 131 139 41        | 40 311    |          |               |    |        |                 |                 |
| PLCO     | 21   | 0.396 0.372 | 26 35 11 181 186 69       | 72 436    | 0.01     | 0.9058733     | 1  | 1.04   | 0.52            | 2.08            |
| WHI      | 7    | 0.387 0.362 | 111 131 46 680 800 213    | 288 1693  | 2.49     | 0.1145473     | 1  | 0.76   | 0.54            | 1.07            |
| STAGE3   | 12   | 0.382 0.374 | 205 241 81 624 763 219    | 527 1606  | 0.99     | 0.3205482     | 1  | 0.87   | 0.66            | 1.15            |
| NHS2     | 6    | 0.422 0.399 | 33 38 19 128 174 56       | 90 358    | 1.54     | 0.2141569     | 1  | 0.69   | 0.39            | 1.24            |
| PBCS2    | 14   | 0.362 0.360 | 134 163 41 283 324 88     | 338 695   | 0.06     | 0.808362      | 1  | 1.05   | 0.71            | 1.56            |
| WHS      | 2    | 0.414 0.375 | 38 40 21 213 265 75       | 99 553    | 3.91     | 0.0479025     | 1  | 0.58   | 0.34            | 1.00            |
| PBCS 1+2 | 9    | 0.347 0.366 | 217 239 59 412 471 138    | 515 1021  | 1.30     | 0.2543744     | 1  | 1.21   | 0.87            | 1.67            |

Locus rs4415084 Alleles C|T Chr 5p12 Location Neighborhood 44698272

| SUBSET   | Rank | MAF         | Geno Counts               | Subjects  | score X2 | score p-value | df | hom OR | hom OR 95% CI_l | hom OR 95% CI_u |
|----------|------|-------------|---------------------------|-----------|----------|---------------|----|--------|-----------------|-----------------|
| STAGE1-3 | 17   | 0.423 0.430 | 439 636 236 1736 2512 998 | 1311 5246 | 0.72     | 0.3968765     | 1  | 1.07   | 0.91            | 1.25            |
| NHS      | 5    | 0.448 0.437 | 57 87 38 240 421 139      | 182 800   | 1.23     | 0.2669903     | 1  | 0.80   | 0.53            | 1.19            |
| STAGE1-2 | 21   | 0.424 0.428 | 267 367 148 1209 1769 681 | 782 3659  | 0.04     | 0.8378262     | 1  | 0.98   | 0.80            | 1.19            |
| STAGE2   | 18   | 0.417 0.425 | 210 280 110 969 1348 542  | 600 2859  | 0.13     | 0.7222166     | 1  | 1.04   | 0.83            | 1.31            |
| CPSII    | 17   | 0.393 0.389 | 16 19 7 121 144 51        | 42 316    | 0.01     | 0.9305476     | 1  | 0.96   | 0.41            | 2.29            |
| PBCS1    | 8    | 0.476 0.463 | 55 88 46 97 185 71        | 189 353   | 1.30     | 0.2545223     | 1  | 0.78   | 0.51            | 1.19            |
| PLCO     | 2    | 0.338 0.407 | 28 42 4 163 205 80        | 74 448    | 7.29     | 0.0069236     | 1  | 3.80   | 1.35            | 10.72           |
| WHI      | 15   | 0.402 0.429 | 111 131 53 588 814 340    | 295 1742  | 0.39     | 0.5322454     | 1  | 1.11   | 0.80            | 1.52            |
| STAGE3   | 5    | 0.421 0.434 | 173 269 89 528 747 319    | 531 1594  | 2.71     | 0.0994217     | 1  | 1.24   | 0.96            | 1.61            |
| NHS2     | 5    | 0.402 0.447 | 32 46 14 111 161 74       | 92 346    | 1.72     | 0.1892782     | 1  | 1.52   | 0.81            | 2.83            |
| PBCS2    | 6    | 0.413 0.440 | 117 165 58 226 346 140    | 340 712   | 1.02     | 0.3122037     | 1  | 1.19   | 0.85            | 1.67            |
| WHS      | 17   | 0.465 0.420 | 24 58 17 191 240 105      | 99 536    | 0.31     | 0.5747869     | 1  | 1.18   | 0.67            | 2.07            |
| PBCS 1+2 | 23   | 0.435 0.447 | 171 253 103 322 527 209   | 527 1058  | 0.01     | 0.9212189     | 1  | 1.01   | 0.78            | 1.32            |

Locus rs999737 Alleles C|T Chr 14q24.1 Location Neighborhood 68104435 RAD51L1

| SUBSET   | Rank | MAF         | Geno Counts              | Subjects  | score X2 | score p-value | df | hom OR | hom OR 95% CI_l | hom OR 95% CI_u |
|----------|------|-------------|--------------------------|-----------|----------|---------------|----|--------|-----------------|-----------------|
| STAGE1-3 | 18   | 0.229 0.216 | 773 472 64 3232 1803 234 | 1309 5269 | 0.49     | 0.4853092     | 1  | 0.90   | 0.68            | 1.20            |
| NHS      | 7    | 0.239 0.209 | 105 67 10 499 278 30     | 182 807   | 1.21     | 0.2716517     | 1  | 0.66   | 0.32            | 1.38            |
| STAGE1-2 | 14   | 0.224 0.211 | 469 275 38 2274 1237 156 | 782 3667  | 0.57     | 0.4518392     | 1  | 0.87   | 0.60            | 1.25            |
| STAGE2   | 20   | 0.220 0.212 | 364 208 28 1775 959 126  | 600 2860  | 0.08     | 0.777995      | 1  | 0.94   | 0.62            | 1.43            |
| CPSII    | 11   | 0.214 0.223 | 27 12 3 193 105 18       | 42 316    | 0.14     | 0.7077769     | 1  | 0.79   | 0.22            | 2.79            |
| PBCS1    | 2    | 0.228 0.203 | 115 62 12 219 125 9      | 189 353   | 4.77     | 0.0289334     | 1  | 0.39   | 0.16            | 0.93            |
| PLCO     | 16   | 0.189 0.225 | 48 24 2 262 170 16       | 74 448    | 0.14     | 0.7043753     | 1  | 1.33   | 0.30            | 5.92            |
| WHI      | 13   | 0.224 0.208 | 174 110 11 1101 559 83   | 295 1743  | 0.61     | 0.4340223     | 1  | 1.29   | 0.68            | 2.45            |
| STAGE3   | 23   | 0.236 0.225 | 305 197 26 959 567 78    | 528 1604  | 0.00     | 0.9546963     | 1  | 0.99   | 0.63            | 1.56            |
| NHS2     | 8    | 0.208 0.234 | 55 31 3 205 120 21       | 89 346    | 0.99     | 0.3200004     | 1  | 1.85   | 0.54            | 6.36            |
| PBCS2    | 19   | 0.234 0.224 | 198 125 17 422 248 34    | 340 704   | 0.01     | 0.9046922     | 1  | 0.96   | 0.53            | 1.75            |
| WHS      | 16   | 0.268 0.221 | 52 41 6 332 199 23       | 99 554    | 0.72     | 0.3957379     | 1  | 0.67   | 0.27            | 1.69            |
| PBCS 1+2 | 3    | 0.232 0.217 | 312 187 29 640 372 43    | 528 1055  | 1.63     | 0.2021839     | 1  | 0.73   | 0.45            | 1.19            |

| Locus     | Alleles | Chr         | Location                 | Neighborhood         |          |               |    |        |                 |                 |  |
|-----------|---------|-------------|--------------------------|----------------------|----------|---------------|----|--------|-----------------|-----------------|--|
| rs3134615 | G T     | 1p34.2      |                          | 40134653 TRIT1,MYCL1 |          |               |    |        |                 |                 |  |
| SUBSET    | Rank    | MAF         | Geno Counts              | Subjects             | score X2 | score p-value | df | hom OR | hom OR 95% CI_l | hom OR 95% CI_u |  |
| STAGE1-3  | 19      | 0.249 0.243 | 734 499 77 3003 1970 297 | 1310 5270            | 0.11     | 0.7347468     | 1  | 0.96   | 0.74            | 1.24            |  |
| NHS       | 14      | 0.260 0.262 | 101 69 13 433 325 49     | 183 807              | 0.27     | 0.6029241     | 1  | 0.85   | 0.45            | 1.59            |  |
| STAGE1-2  | 20      | 0.255 0.247 | 428 310 45 2072 1377 218 | 783 3667             | 0.05     | 0.8312862     | 1  | 1.04   | 0.74            | 1.44            |  |
| STAGE2    | 14      | 0.254 0.243 | 327 241 32 1639 1052 169 | 600 2860             | 0.30     | 0.5835917     | 1  | 1.11   | 0.76            | 1.64            |  |
| CPSII     | 15      | 0.250 0.222 | 23 17 2 193 106 17       | 42 316               | 0.03     | 0.866735      | 1  | 1.14   | 0.25            | 5.11            |  |
| PBCS1     | 4       | 0.235 0.231 | 106 77 6 213 117 23      | 189 353              | 2.71     | 0.0995267     | 1  | 2.13   | 0.85            | 5.32            |  |
| PLCO      | 12      | 0.264 0.253 | 38 33 3 247 175 26       | 74 448               | 0.37     | 0.5427395     | 1  | 1.46   | 0.43            | 4.95            |  |
| WHI       | 12      | 0.264 0.247 | 160 114 21 986 654 103   | 295 1743             | 0.65     | 0.4216586     | 1  | 0.82   | 0.50            | 1.33            |  |
| STAGE3    | 13      | 0.241 0.235 | 306 190 32 931 595 80    | 528 1606             | 0.93     | 0.3346599     | 1  | 0.81   | 0.53            | 1.24            |  |
| NHS2      | 9       | 0.230 0.244 | 54 26 7 196 131 19       | 87 346               | 0.80     | 0.3699434     | 1  | 0.66   | 0.27            | 1.63            |  |
| PBCS2     | 13      | 0.230 0.225 | 202 124 17 427 240 39    | 343 706              | 0.15     | 0.701148      | 1  | 1.12   | 0.62            | 2.01            |  |
| WHS       | 3       | 0.286 0.242 | 50 40 8 308 224 22       | 98 554               | 3.33     | 0.0678683     | 1  | 0.47   | 0.20            | 1.08            |  |
| PBCS 1+2  | 7       | 0.232 0.226 | 308 200 23 640 355 61    | 531 1056             | 1.47     | 0.2250496     | 1  | 1.35   | 0.83            | 2.21            |  |

| Locus     | Alleles | Chr         | Location                   | Neighborhood   |          |               |    |        |                 |                 |  |
|-----------|---------|-------------|----------------------------|----------------|----------|---------------|----|--------|-----------------|-----------------|--|
| rs1274466 | T C     | 10p11.21    |                            | 34510210 PARD3 |          |               |    |        |                 |                 |  |
| SUBSET    | Rank    | MAF         | Geno Counts                | Subjects       | score X2 | score p-value | df | hom OR | hom OR 95% CI_l | hom OR 95% CI_u |  |
| STAGE1-3  | 20      | 0.436 0.433 | 411 654 244 1706 2563 1004 | 1309 5273      | 0.11     | 0.7409293     | 1  | 1.03   | 0.88            | 1.20            |  |
| NHS       | 10      | 0.432 0.436 | 55 98 30 261 388 158       | 183 807        | 0.98     | 0.321259      | 1  | 1.24   | 0.81            | 1.91            |  |
| STAGE1-2  | 6       | 0.427 0.429 | 248 402 133 1213 1761 692  | 783 3666       | 1.53     | 0.2166931     | 1  | 1.14   | 0.93            | 1.39            |  |
| STAGE2    | 9       | 0.425 0.427 | 193 304 103 952 1373 534   | 600 2859       | 0.75     | 0.3852741     | 1  | 1.11   | 0.88            | 1.40            |  |
| CPSII     | 13      | 0.429 0.440 | 15 18 9 101 152 63         | 42 316         | 0.05     | 0.8207229     | 1  | 0.91   | 0.42            | 2.01            |  |
| PBCS1     | 12      | 0.439 0.457 | 57 98 34 104 174 74        | 189 352        | 0.71     | 0.4000596     | 1  | 1.21   | 0.77            | 1.91            |  |
| PLCO      | 5       | 0.453 0.391 | 22 37 15 167 212 69        | 74 448         | 1.11     | 0.2910312     | 1  | 0.72   | 0.38            | 1.33            |  |
| WHI       | 9       | 0.408 0.428 | 99 151 45 580 835 328      | 295 1743       | 2.14     | 0.1432089     | 1  | 1.29   | 0.92            | 1.81            |  |
| STAGE3    | 16      | 0.450 0.444 | 164 252 111 493 802 313    | 527 1608       | 0.64     | 0.4250174     | 1  | 0.91   | 0.71            | 1.16            |  |
| NHS2      | 7       | 0.500 0.429 | 21 47 21 114 168 65        | 89 347         | 1.06     | 0.3036413     | 1  | 0.75   | 0.43            | 1.30            |  |
| PBCS2     | 18      | 0.432 0.451 | 115 156 69 211 357 141     | 340 709        | 0.02     | 0.8774747     | 1  | 0.98   | 0.71            | 1.35            |  |
| WHS       | 18      | 0.464 0.445 | 28 49 21 168 277 107       | 98 552         | 0.22     | 0.6390572     | 1  | 0.88   | 0.52            | 1.49            |  |
| PBCS 1+2  | 18      | 0.436 0.452 | 171 254 103 315 531 214    | 528 1060       | 0.10     | 0.7490488     | 1  | 1.04   | 0.80            | 1.36            |  |

| Locus      | Alleles | Chr         | Location                 | Neighborhood   |          |               |    |        |                 |                 |  |
|------------|---------|-------------|--------------------------|----------------|----------|---------------|----|--------|-----------------|-----------------|--|
| rs17570439 | T C     | 1p34.2      |                          | 40096797 TRIT1 |          |               |    |        |                 |                 |  |
| SUBSET     | Rank    | MAF         | Geno Counts              | Subjects       | score X2 | score p-value | df | hom OR | hom OR 95% CI_l | hom OR 95% CI_u |  |
| STAGE1-3   | 21      | 0.231 0.224 | 769 476 65 3177 1825 269 | 1310 5271      | 0.04     | 0.8345139     | 1  | 1.03   | 0.78            | 1.36            |  |
| NHS        | 20      | 0.238 0.245 | 107 65 11 457 304 46     | 183 807        | 0.03     | 0.8705474     | 1  | 0.95   | 0.48            | 1.86            |  |
| STAGE1-2   | 13      | 0.234 0.228 | 453 292 37 2196 1270 201 | 782 3667       | 0.72     | 0.397531      | 1  | 1.17   | 0.82            | 1.67            |  |
| STAGE2     | 6       | 0.233 0.223 | 346 227 26 1739 966 155  | 599 2860       | 1.16     | 0.2808833     | 1  | 1.26   | 0.83            | 1.93            |  |
| CPSII      | 16      | 0.262 0.201 | 22 18 2 203 99 14        | 42 316         | 0.01     | 0.9221779     | 1  | 0.93   | 0.20            | 4.23            |  |
| PBCS1      | 3       | 0.214 0.215 | 113 71 5 223 108 22      | 189 353        | 3.35     | 0.0673839     | 1  | 2.45   | 0.91            | 6.57            |  |
| PLCO       | 7       | 0.243 0.238 | 40 32 2 259 165 24       | 74 448         | 0.95     | 0.3308621     | 1  | 2.04   | 0.47            | 8.81            |  |
| WHI        | 20      | 0.238 0.225 | 171 106 17 1054 594 95   | 294 1743       | 0.05     | 0.8173391     | 1  | 0.94   | 0.55            | 1.60            |  |
| STAGE3     | 11      | 0.227 0.215 | 316 184 28 981 555 68    | 528 1604       | 1.05     | 0.306639      | 1  | 0.79   | 0.50            | 1.24            |  |
| NHS2       | 13      | 0.236 0.232 | 53 30 6 201 125 17       | 89 343         | 0.45     | 0.5038446     | 1  | 0.72   | 0.28            | 1.89            |  |
| PBCS2      | 17      | 0.215 0.210 | 211 115 16 448 228 35    | 342 711        | 0.03     | 0.8627179     | 1  | 1.05   | 0.58            | 1.93            |  |
| WHS        | 4       | 0.263 0.213 | 52 39 6 332 202 16       | 97 550         | 2.69     | 0.1006669     | 1  | 0.45   | 0.17            | 1.19            |  |
| PBCS 1+2   | 6       | 0.215 0.211 | 324 186 21 671 336 57    | 531 1064       | 1.50     | 0.2210262     | 1  | 1.37   | 0.82            | 2.29            |  |

| Locus     | Alleles | Chr    | Location | Neighborhood |
|-----------|---------|--------|----------|--------------|
| rs4666451 | G A     | 2p24.1 |          | 19150424     |

| SUBSET   | Rank | MAF         | Geno Counts               | Subjects  | score X2 | score p-value | df | hom OR | hom OR 95% CI_l | hom OR 95% CI_u |
|----------|------|-------------|---------------------------|-----------|----------|---------------|----|--------|-----------------|-----------------|
| STAGE1-3 | 22   | 0.385 0.386 | 428 533 168 1679 2133 657 | 1129 4469 | 0.02     | 0.8794025     | 1  | 0.99   | 0.82            | 1.18            |
| STAGE1-2 | 11   | 0.361 0.384 | 245 277 78 1078 1366 416  | 600 2860  | 0.97     | 0.3252171     | 1  | 1.14   | 0.88            | 1.48            |
| STAGE2   | 8    | 0.361 0.384 | 245 277 78 1078 1366 416  | 600 2860  | 0.97     | 0.3252171     | 1  | 1.14   | 0.88            | 1.48            |
| CPSII    | 7    | 0.369 0.413 | 18 17 7 96 179 41         | 42 316    | 0.44     | 0.5094254     | 1  | 0.75   | 0.31            | 1.79            |
| PBCS1    | 13   | 0.384 0.375 | 67 99 23 140 161 52       | 189 353   | 0.68     | 0.4104708     | 1  | 1.25   | 0.74            | 2.11            |
| PLCO     | 3    | 0.338 0.394 | 30 38 6 170 203 75        | 74 448    | 3.61     | 0.0574133     | 1  | 2.28   | 0.95            | 5.44            |
| WHI      | 22   | 0.351 0.378 | 130 123 42 672 823 248    | 295 1743  | 0.00     | 0.9967546     | 1  | 1.00   | 0.70            | 1.42            |
| STAGE3   | 9    | 0.412 0.388 | 183 257 90 601 769 241    | 530 1611  | 1.25     | 0.2641516     | 1  | 0.86   | 0.66            | 1.12            |
| NHS2     | 1    | 0.439 0.369 | 33 35 22 134 171 43       | 90 348    | 8.27     | 0.0040354     | 1  | 0.44   | 0.24            | 0.78            |
| PBCS2    | 10   | 0.411 0.398 | 111 181 50 263 330 118    | 342 711   | 0.67     | 0.4120977     | 1  | 1.16   | 0.81            | 1.66            |
| WHS      | 13   | 0.393 0.388 | 39 41 18 204 268 80       | 98 552    | 0.98     | 0.3232353     | 1  | 0.75   | 0.43            | 1.32            |
| PBCS 1+2 | 8    | 0.401 0.390 | 178 279 73 403 489 170    | 530 1062  | 1.36     | 0.2428145     | 1  | 1.19   | 0.89            | 1.60            |

Locus Alleles Chr Location Neighborhood  
rs2303659 G|A 11q24.3 129326474 PRDM10

| SUBSET   | Rank | MAF         | Geno Counts          | Subjects  | score X2 | score p-value | df  | hom OR | hom OR 95% CI_l | hom OR 95% CI_u |
|----------|------|-------------|----------------------|-----------|----------|---------------|-----|--------|-----------------|-----------------|
| STAGE1-3 | 23   | 0.024 0.026 | 1251 59 2 4997 257 9 | 1312 5263 | 0.02     | 0.8829571     | 1   | 1.12   | 0.24            | 5.20            |
| NHS      | 22   | 0.022 0.026 | 175 8 0 765 42 0     | 183 807   | -        |               | 1 1 | 1.00   | 1.00            | 1.00            |
| STAGE1-2 | 23   | 0.022 0.025 | 749 34 0 3487 178 2  | 783 3667  |          |               |     |        |                 |                 |
| STAGE2   | 23   | 0.022 0.024 | 574 26 0 2722 136 2  | 600 2860  |          |               |     |        |                 |                 |
| CPSII    | 22   | 0.000 0.019 | 42 0 0 305 10 1      | 42 316    |          |               |     |        |                 |                 |
| PBCS1    | 22   | 0.021 0.024 | 181 8 0 336 17 0     | 189 353   | -        |               | 1 1 | 1.00   | 1.00            | 1.00            |
| PLCO     | 24   | 0.020 0.026 | 71 3 0 425 23 0      | 74 448    | -        |               | 1 1 | 1.00   | 1.00            | 1.00            |
| WHI      | 24   | 0.025 0.025 | 280 15 0 1656 86 1   | 295 1743  |          |               |     |        |                 |                 |
| STAGE3   | 22   | 0.027 0.029 | 502 25 2 1511 79 7   | 529 1597  | 0.03     | 0.8532405     | 1   | 1.16   | 0.24            | 5.60            |
| NHS2     | 24   | 0.000 0.030 | 88 0 0 334 15 3      | 88 352    |          |               |     |        |                 |                 |
| PBCS2    | 24   | 0.033 0.028 | 322 21 1 669 40 0    | 344 709   |          |               |     |        |                 |                 |
| WHS      | 19   | 0.031 0.030 | 92 4 1 508 24 4      | 97 536    | 0.08     | 0.7707244     | 1   | 0.72   | 0.08            | 6.53            |
| PBCS 1+2 | 24   | 0.029 0.027 | 503 29 1 1004 57 0   | 533 1061  |          |               |     |        |                 |                 |

Locus Alleles Chr Location Neighborhood  
rs724244 C|T 3p24.1 27217157 NEK10

| SUBSET   | Rank | MAF         | Geno Counts              | Subjects  | score X2 | score p-value | df | hom OR | hom OR 95% CI_l | hom OR 95% CI_u |
|----------|------|-------------|--------------------------|-----------|----------|---------------|----|--------|-----------------|-----------------|
| STAGE1-3 | 24   | 0.267 0.274 | 609 432 85 2365 1767 340 | 1126 4472 | 0.00     | 0.9512282     | 1  | 1.01   | 0.79            | 1.29            |
| STAGE1-2 | 18   | 0.277 0.275 | 316 234 49 1508 1131 220 | 599 2859  | 0.16     | 0.6867865     | 1  | 0.94   | 0.68            | 1.29            |
| STAGE2   | 17   | 0.277 0.275 | 316 234 49 1508 1131 220 | 599 2859  | 0.16     | 0.6867865     | 1  | 0.94   | 0.68            | 1.29            |
| CPSII    | 4    | 0.310 0.266 | 21 16 5 173 118 25       | 42 316    | 0.77     | 0.3802102     | 1  | 0.64   | 0.23            | 1.76            |
| PBCS1    | 9    | 0.250 0.265 | 106 70 12 198 123 32     | 188 353   | 1.18     | 0.2771272     | 1  | 1.46   | 0.73            | 2.91            |
| PLCO     | 4    | 0.257 0.271 | 44 22 8 235 182 30       | 74 447    | 1.58     | 0.2090594     | 1  | 0.59   | 0.26            | 1.35            |
| WHI      | 18   | 0.295 0.279 | 145 126 24 902 708 133   | 295 1743  | 0.09     | 0.7635183     | 1  | 0.93   | 0.59            | 1.47            |
| STAGE3   | 20   | 0.257 0.272 | 294 198 37 857 636 120   | 529 1613  | 0.12     | 0.7331334     | 1  | 1.07   | 0.73            | 1.57            |
| NHS2     | 15   | 0.278 0.286 | 48 31 9 179 142 29       | 88 350    | 0.33     | 0.5629826     | 1  | 0.79   | 0.36            | 1.74            |
| PBCS2    | 23   | 0.244 0.265 | 198 121 23 381 280 48    | 342 709   | 0.00     | 0.9782962     | 1  | 1.01   | 0.60            | 1.69            |
| WHS      | 15   | 0.283 0.271 | 48 46 5 297 214 43       | 99 554    | 0.91     | 0.3410305     | 1  | 1.58   | 0.61            | 4.10            |
| PBCS 1+2 | 12   | 0.245 0.265 | 303 191 34 579 403 80    | 528 1062  | 0.63     | 0.4260184     | 1  | 1.18   | 0.78            | 1.79            |
